# Supplementary material for: Propionyl-CoA carboxylase subunit B regulates anti-tumor T cells in a pancreatic cancer mouse model
Source: eLife. 2025 Mar 11;13:RP96925. doi: 10.7554/eLife.96925 (PMC11896608; doi:10.7554/eLife.96925)
Supplement: Figure 1—source data 1. [file elife-96925-fig1-data1.xlsx]

## Sheet: Clone size distribution
Clone size	aKO2	aKO1
1	133	615
2	12	15
3	4	9
4	2	4
5	2	5
6	2	5
7	1	1
8	0	1
9	0	2
10	1	2
11	0	2
15	1	1
16	0	1
17	1	0
19	0	1
22	0	1
36	1	0
45	1	0
46	1	0
47	0	1
57	0	1
68	0	1
82	0	1
102	0	1
134	1	0
140	1	0
180	0	1
303	1	0
551	1	0
