# Supplementary material for: Propionyl-CoA carboxylase subunit B regulates anti-tumor T cells in a pancreatic cancer mouse model
Source: eLife. 2025 Mar 11;13:RP96925. doi: 10.7554/eLife.96925 (PMC11896608; doi:10.7554/eLife.96925)
Supplement: Figure 1—source data 2. [file elife-96925-fig1-data2.xlsx]

## Sheet: aKO1
clone	clonotype_id	aKO	cdr3s_aa
clone_1_aK0	clonotype1aKO	183	TRB:CASRDRGLQNTLYF;TRA:CAMTYSAGNKLTF
clone_2_aK0	clonotype2aKO	128	TRB:CASSQEGRTDNERLFF;TRA:CAATRNNNNAPRF;TRA:CALPSNTNKVVF
clone_3_aK0	clonotype3aKO	105	TRB:CASSLRGSSAETLYF;TRA:CALGFSTNSAGNKLTF
clone_4_aK0	clonotype4aKO	83	TRB:CASSGGAHAEQFF;TRA:CAASYQGGRALIF;TRA:CALRDNTNTGKLTF
clone_5_aK0	clonotype5aKO	83	TRB:CASSSRDFNYAEQFF;TRA:CALSGQGGRALIF;TRA:CAVRDPPWGSSGNKLIF
clone_6_aK0	clonotype6aKO	68	TRB:CASGDIQSNTEVFF;TRA:CAASEHGGSALGRLHF
clone_7_aK0	clonotype7aKO	57	TRB:CASSLGLGVNTGQLYF;TRA:CALGDLYSNNRLTL
clone_8_aK0	clonotype8aKO	57	TRB:CASSRTGLNQDTQYF;TRA:CAARGAGSFNKLTF
clone_9_aK0	clonotype9aKO	47	TRB:CASSLWDTANSDYTF;TRA:CAVSVGNYKYVF
clone_10_aK0	clonotype10aKO	36	TRB:CASGEGRGYEQYF;TRA:CAASKGRGYSNNRLTL
clone_11_aK0	clonotype11aKO	36	TRB:CASSLGGQYAEQFF;TRA:CALGDRGSALGRLHF;TRA:CALSGQGGRALIF
clone_12_aK0	clonotype12aKO	32	TRB:CASSQEGRTDNERLFF
clone_13_aK0	clonotype16aKO	31	TRB:CASSFSGTGNERLFF;TRA:CALTNYNQGKLIF
clone_14_aK0	clonotype13aKO	30	TRB:CASSSGTKDTQYF;TRA:CALGRNSNNRIFF
clone_15_aK0	clonotype18aKO	27	TRB:CTCSADLTGQLYF;TRA:CAANVNTGNYKYVF
clone_16_aK0	clonotype17aKO	24	TRB:CASSTPGTGNERLFF;TRA:CAVASSGSWQLIF
clone_17_aK0	clonotype19aKO	24	TRB:CASSQEGRTDNERLFF;TRA:CAARRNNNNAPRF
clone_18_aK0	clonotype20aKO	22	TRB:CTCSADERKNTLYF;TRA:CAVRLSSSGSWQLIF
clone_19_aK0	clonotype21aKO	21	TRB:CASSPPGRHAEQFF;TRA:CAMRSTSSGQKLVF
clone_20_aK0	clonotype23aKO	21	TRB:CASSQEGRTSNERLFF;TRA:CAAVRNNNNAPRF
clone_21_aK0	clonotype22aKO	19	TRB:CASSLGGASAETLYF;TRA:CAAEAWSNYNVLYF;TRA:CAISNNRIFF
clone_22_aK0	clonotype25aKO	17	TRB:CASSPGQVANSDYTF;TRA:CIVTEQTGGYKVVF
clone_23_aK0	clonotype26aKO	17	TRB:CASSQEGRTNTGQLYF;TRA:CAVSRNNNNAPRF
clone_24_aK0	clonotype27aKO	17	TRB:CTCSAVTGGREQYF;TRA:CALEPTGGNNKLTF;TRA:CAVSGNTGYQNFYF
clone_25_aK0	clonotype30aKO	17	TRB:CASSSRDFNYAEQFF
clone_26_aK0	clonotype14aKO	16	TRB:CASSLGDRQDTQYF;TRA:CAMEWTGGYKVVF
clone_27_aK0	clonotype15aKO	16	TRB:CASRSGTGGAQDTQYF;TRA:CAVSVSNTNKVVF
clone_28_aK0	clonotype28aKO	16	TRB:CASSLSGGGSSAETLYF
clone_29_aK0	clonotype29aKO	16	TRB:CASSQDLGGRGQNTLYF;TRA:CAAGGNNKLTF
clone_30_aK0	clonotype31aKO	15	TRB:CASSDAAERLFF;TRA:CAAMATGGNNKLTF;TRA:CAARALNQGGSAKLIF
clone_31_aK0	clonotype36aKO	14	TRB:CASSDDRNTEVFF;TRA:CAMSHSGTYQRF
clone_32_aK0	clonotype32aKO	13	TRB:CASSPGVSNERLFF;TRB:CASSQDAWGLYAEQFF;TRA:CALGDYSNNRLTL
clone_33_aK0	clonotype34aKO	12	TRB:CTCSAGTGRGTGQLYF;TRA:CALTAGGSNAKLTF
clone_34_aK0	clonotype35aKO	12	TRB:CASSDAAERLFF;TRA:CAGMATGGNNKLTF
clone_35_aK0	clonotype39aKO	12	TRB:CASGVRANSDYTF
clone_36_aK0	clonotype43aKO	12	TRB:CASSLEYEQYF;TRA:CAASNGGNNKLTF
clone_37_aK0	clonotype38aKO	11	TRB:CASSLGGSNERLFF;TRA:CALAYMGYKLTF
clone_38_aK0	clonotype40aKO	11	TRB:CASGDARTGGAHAEQFF;TRA:CAVRNMATGGNNKLTF
clone_39_aK0	clonotype41aKO	11	TRB:CASSLESRGRAQYF;TRA:CALGGGTGNTGKLIF
clone_40_aK0	clonotype42aKO	11	TRB:CASSQDWGGRGIYAEQFF;TRA:CAASEHSNMGYKLTF
clone_41_aK0	clonotype24aKO	10	TRB:CASGDFQPANTEVFF;TRA:CAARPPNQGGSAKLIF;TRA:CALDTQGTGSKLSF
clone_42_aK0	clonotype44aKO	10	TRB:CASSQERETLYF;TRA:CAVMLSGSFNKLTF
clone_43_aK0	clonotype46aKO	10	TRB:CASSQDGSPNSDYTF;TRB:CASSVPGQGRTGQLYF;TRA:CAVNSNNRIFF
clone_44_aK0	clonotype33aKO	9	TRB:CASSFHRGQDTQYF;TRA:CAIDRANSGTYQRF;TRA:CAVSMDMGYKLTF
clone_45_aK0	clonotype47aKO	9	TRB:CASGDYRDWGGRAEQFF;TRA:CAMERRGGATGGNNKLTF
clone_46_aK0	clonotype48aKO	9	TRB:CASSLGRYEQYF;TRA:CAMALNTGNYKYVF
clone_47_aK0	clonotype49aKO	9	TRB:CASSSGTKDTQYF;TRA:CALGRNSNNRIFF
clone_48_aK0	clonotype50aKO	9	TRB:CASSLAGGRDTEVFF;TRA:CAASAHDTNAYKVIF
clone_49_aK0	clonotype45aKO	8	TRB:CASRRDRTIYEQYF;TRA:CILFTGSGGKLTL
clone_50_aK0	clonotype51aKO	8	TRB:CASSLSGGGSSAETLYF;TRA:CAMREWGGSGGKLTL
clone_51_aK0	clonotype56aKO	8	TRB:CASSLGGQYAEQFF
clone_52_aK0	clonotype52aKO	7	TRB:CASSDDIQAPLF;TRA:CAGNNAGAKLTF
clone_53_aK0	clonotype55aKO	7	TRB:CASPTGERGERLFF;TRB:CASSIGGGRGAETLYF;TRA:CSASIYNQGKLIF
clone_54_aK0	clonotype58aKO	7	TRB:CASSLEYEQYF;TRA:CAASSGGNNKLTF;TRA:CALERGSGGSNYKLTF
clone_55_aK0	clonotype59aKO	7	TRB:CASGADRGRAETLYF;TRA:CAAFSGGSNAKLTF
clone_56_aK0	clonotype61aKO	7	TRB:CASSQQGYEQYF;TRA:CALEPGSWQLIF;TRA:CAVNYNQGKLIF
clone_57_aK0	clonotype62aKO	7	TRB:CAWSRLQVSNERLFF;TRA:CALSGGGANTGKLTF
clone_58_aK0	clonotype53aKO	6	TRB:CASSDGGSYEQYF;TRA:CAASATASLGKLQF
clone_59_aK0	clonotype57aKO	6	TRB:CASRDRDTEVFF;TRB:CASSFTGTGEWTLYF;TRA:CALSPYDTNAYKVIF
clone_60_aK0	clonotype64aKO	6	TRB:CASGDEDSAETLYF;TRA:CAVSPTGFASALTF
clone_61_aK0	clonotype71aKO	6	TRB:CASSNWGNYAEQFF;TRB:CASSQDLGGRGQNTLYF;TRA:CAASKGRGYSNNRLTL;TRA:CATGGNNKLTF
clone_62_aK0	clonotype72aKO	6	TRB:CTCSPSRGSAETLYF;TRA:CALRGTGNTGKLIF
clone_63_aK0	clonotype73aKO	6	TRB:CASGDARGYNSPLYF;TRA:CAASEKTGANTGKLTF
clone_64_aK0	clonotype54aKO	5	TRB:CASIGRSGNTLYF;TRB:CASSDQKISNERLFF;TRA:CAIGKMSNYNVLYF
clone_65_aK0	clonotype60aKO	5	TRB:CASSPRLGTNTGQLYF;TRB:CASSRDRRTLYF;TRA:CAARRDYNQGKLIF
clone_66_aK0	clonotype65aKO	5	TRB:CASRDSAETLYF;TRA:CAAEPTGGNNKLTF
clone_67_aK0	clonotype68aKO	5	TRB:CASSQDWVNTGQLYF;TRA:CAASPLLGSGGKLTL;TRA:CAMREGGSSNTNKVVF;TRA:CAMREGGSSNTNKVVF
clone_68_aK0	clonotype74aKO	5	TRB:CASSLVGGAAAEQFF
clone_69_aK0	clonotype75aKO	5	TRB:CASGDIQSNTEVFF;TRA:CAASEHGGSALGRLHF
clone_70_aK0	clonotype76aKO	5	TRB:CASSQELGSAETLYF;TRA:CALSEGTGYQNFYF
clone_71_aK0	clonotype78aKO	5	TRB:CASSMGQYYAEQFF;TRA:CALGGGYQNFYF;TRA:CALWESHMDYANKMIF
clone_72_aK0	clonotype103aKO	4	TRB:CASGGDRGRAETLYF;TRA:CAAFSGGSNAKLTF
clone_73_aK0	clonotype104aKO	4	TRB:CASGDWGGGTGQLYF;TRA:CAVSAHNNNAPRF
clone_74_aK0	clonotype105aKO	4	TRB:CASSLVGGAAAEQFF;TRA:CAADSSGSWQLIF;TRA:CVLSANTGYQNFYF
clone_75_aK0	clonotype37aKO	4	TRB:CASSSSGASAETLYF;TRA:CAAELMSNYNVLYF
clone_76_aK0	clonotype66aKO	4	TRB:CASSPQNTEVFF;TRA:CALRWSSGSWQLIF;TRA:CAMRERGGSALGRLHF
clone_77_aK0	clonotype79aKO	4	TRB:CASSPGGSGERLFF;TRB:CAWSLLLGVDTQYF;TRA:CALNSGGSNAKLTF
clone_78_aK0	clonotype84aKO	4	TRB:CAWSLDGQLYF;TRA:CATYHNYAQGLTF
clone_79_aK0	clonotype85aKO	4	TRB:CASGDQNTEVFF;TRB:CAWRKDRYNSPLYF;TRA:CAAHNNYAQGLTF
clone_80_aK0	clonotype86aKO	4	TRB:CASSDGTGNSDYTF;TRA:CALGAQGGSAKLIF
clone_81_aK0	clonotype92aKO	4	TRB:CASGDWGGNTGQLYF;TRA:CAARTGSGGKLTL
clone_82_aK0	clonotype97aKO	4	TRB:CASGDYRDWGGRAEQFF;TRA:CAMERRGGATGGNNKLTF
clone_83_aK0	clonotype98aKO	4	TRB:CASSIGLVQNTLYF;TRA:CAENTGANTGKLTF
clone_84_aK0	clonotype100aKO	3	TRB:CASGEQLRQYF;TRA:CAFNTGNYKYVF
clone_85_aK0	clonotype101aKO	3	TRB:CASGTGTANTEVFF;TRA:CAASEASSGSWQLIF;TRA:CALSERYNQGKLIF
clone_86_aK0	clonotype102aKO	3	TRB:CASGDARGYNSPLYF;TRA:CAMREAPTGGYKVVF
clone_87_aK0	clonotype106aKO	3	TRB:CASSQGPGVEQYF;TRA:CAIDTEGADRLTF
clone_88_aK0	clonotype107aKO	3	TRB:CAWSIQGNTEVFF;TRA:CILRGMATGGNNKLTF
clone_89_aK0	clonotype109aKO	3	TRB:CAWSLGGAETLYF;TRA:CALALYQGGRALIF
clone_90_aK0	clonotype111aKO	3	TRB:CASSQEDTAEQFF;TRA:CAVRAMDSNYQLIW;TRA:CAVSAASSGQKLVF
clone_91_aK0	clonotype112aKO	3	TRB:CASSENSNQDTQYF;TRA:CAAGNSNNRIFF
clone_92_aK0	clonotype113aKO	3	TRB:CASSQEGDLDTQYF;TRA:CATDAGYGSSGNKLIF
clone_93_aK0	clonotype114aKO	3	TRB:CASSQEDTQDTQYF;TRA:CAVSARTNAYKVIF
clone_94_aK0	clonotype116aKO	3	TRB:CASRTGTGGRVFF;TRA:CAAEAGGSNAKLTF
clone_95_aK0	clonotype117aKO	3	TRB:CASSQEGWGSYEQYF;TRA:CAASEGQGTGSKLSF
clone_96_aK0	clonotype118aKO	3	TRB:CASSFTGGQNTLYF;TRA:CALSTANYNVLYF
clone_97_aK0	clonotype119aKO	3	TRB:CASSSGGWDTQYF;TRA:CASLNTGANTGKLTF
clone_98_aK0	clonotype120aKO	3	TRB:CASSLGLSYEQYF;TRA:CAMREGTSSGQKLVF
clone_99_aK0	clonotype121aKO	3	TRB:CASSLGQNSDYTF;TRA:CAVIWGGGNNKLTF
clone_100_aK0	clonotype122aKO	3	TRB:CASSQELGSAETLYF;TRA:CALSDGTGYQNFYF
clone_101_aK0	clonotype123aKO	3	TRB:CASSLQGAPEQFF;TRA:CALSDPGYQNFYF
clone_102_aK0	clonotype125aKO	3	TRB:CASSPLDRGVEQYF;TRA:CAANQGGSAKLIF
clone_103_aK0	clonotype126aKO	3	TRB:CASSLGQGGNERLFF;TRB:CASSQDGRANTEVFF;TRA:CAALDSNYQLIW
clone_104_aK0	clonotype127aKO	3	TRB:CASSLEGTLNTEVFF;TRA:CAMRPITGNTGKLIF
clone_105_aK0	clonotype130aKO	3	TRB:CASSITTSGNTLYF;TRA:CAANNYAQGLTF
clone_106_aK0	clonotype132aKO	3	TRB:CASGDIQSNTEVFF;TRA:CAASEHGGSALGRLHF
clone_107_aK0	clonotype63aKO	3	TRB:CASSFGGGLNYAEQFF
clone_108_aK0	clonotype67aKO	3	TRB:CASRPGGANTEVFF;TRB:CGASRGTGQLYF;TRA:CAVSARGGRALIF
clone_109_aK0	clonotype69aKO	3	TRB:CASGDARDRGHERLFF;TRB:CASGDARDRGHERLFF;TRB:CASSWDNNYAEQFF;TRA:CAVSAMNYNQGKLIF
clone_110_aK0	clonotype70aKO	3	TRB:CASSPTGGALYEQYF;TRA:CALSEGGYSNNRLTL
clone_111_aK0	clonotype77aKO	3	TRB:CASSQETGGLSYEQYF;TRB:CTCSAAGAETLYF;TRA:CAASMPNYNVLYF
clone_112_aK0	clonotype81aKO	3	TRB:CASSFYNYEQYF;TRB:CASSQETEQFF;TRA:CAASERGSALGRLHF
clone_113_aK0	clonotype82aKO	3	TRB:CASSPGLGGYEQYF;TRA:CAVSRGFASALTF;TRA:CAVYANKMIF
clone_114_aK0	clonotype88aKO	3	TRB:CASSPGTDEQYF;TRA:CALSGQGGRALIF
clone_115_aK0	clonotype89aKO	3	TRB:CASSLRDWNTGQLYF;TRA:CALGTGNTGKLIF
clone_116_aK0	clonotype93aKO	3	TRB:CASSQAGSSAETLYF;TRA:CAAEAMSNYNVLYF;TRA:CAAEAYSGYNKLTF
clone_117_aK0	clonotype94aKO	3	TRB:CASSSTGSVAETLYF;TRA:CAAEPMSNYNVLYF
clone_118_aK0	clonotype96aKO	3	TRB:CASSLEGTSGNTLYF;TRA:CAFNMGYKLTF
clone_119_aK0	clonotype99aKO	3	TRB:CASSLSRHQAPLF;TRA:CALGVTGNTGKLIF
clone_120_aK0	clonotype110aKO	2	TRB:CGATGGLNERLFF;TRA:CALGDPNAGAKLTF
clone_121_aK0	clonotype115aKO	2	TRB:CASKQGAFSQNTLYF;TRA:CAMREGPNTGKLTF
clone_122_aK0	clonotype131aKO	2	TRB:CASSQEGTGKGTQYF;TRA:CAARSNTNKVVF
clone_123_aK0	clonotype136aKO	2	TRB:CASSDAAETLYF;TRA:CAAMATGGNNKLTF
clone_124_aK0	clonotype138aKO	2	TRB:CASGEGRGYEQYF;TRB:CASSQEGHQDTQYF;TRA:CAASKGRGYSNNRLTL
clone_125_aK0	clonotype139aKO	2	TRB:CATGDRGFGNTLYF;TRA:CAAGLYAQGLTF
clone_126_aK0	clonotype140aKO	2	TRB:CASSDGRGQNTLYF;TRA:CAMREGYNQGKLIF
clone_127_aK0	clonotype141aKO	2	TRB:CASSAGGDTGQLYF;TRA:CAASHQGGSAKLIF;TRA:CAMEQGGFASALTF
clone_128_aK0	clonotype142aKO	2	TRB:CASGGQNTLYF;TRA:CAIDLYNQGKLIF
clone_129_aK0	clonotype143aKO	2	TRB:CAWSLQVSNERLFF;TRA:CALGSGGSNAKLTF
clone_130_aK0	clonotype144aKO	2	TRB:CASSDRRNSDYTF;TRA:CAVSMNNYAQGLTF;TRA:CSASKNTNTGKLTF
clone_131_aK0	clonotype145aKO	2	TRB:CGARETVNQDTQYF;TRA:CAVSEVPNTGKLTF
clone_132_aK0	clonotype149aKO	2	TRB:CASSDASSAETLYF;TRA:CAARDNTGKLTF
clone_133_aK0	clonotype153aKO	2	TRB:CASSQDFWSYEQYF;TRA:CAASVGNNAGAKLTF
clone_134_aK0	clonotype155aKO	2	TRB:CASSLSQYEQYF;TRA:CALSDRRNAGAKLTF
clone_135_aK0	clonotype156aKO	2	TRB:CASSQERLGGYEQYF;TRA:CVLSAGSSGNKLIF
clone_136_aK0	clonotype157aKO	2	TRB:CASSQATDSGNTLYF;TRA:CAASMSGSGGKLTL
clone_137_aK0	clonotype159aKO	2	TRB:CASSHVGFNQDTQYF;TRB:CASSPRKQDTQYF;TRA:CALSMLNTNKVVF
clone_138_aK0	clonotype160aKO	2	TRB:CASSLERGREQYF;TRA:CAVSATGGNNKLTF
clone_139_aK0	clonotype161aKO	2	TRB:CASSFLGVSYEQYF;TRA:CAVSATNYNVLYF
clone_140_aK0	clonotype162aKO	2	TRB:CASSQDYANTGQLYF;TRA:CAPNSNNRIFF
clone_141_aK0	clonotype163aKO	2	TRB:CASSQDKYSGNTLYF;TRA:CAALNTNTGKLTF;TRA:CATDAGYNQGKLIF
clone_142_aK0	clonotype164aKO	2	TRB:CASSQMGSSAETLYF;TRA:CAAEEFSNYNVLYF
clone_143_aK0	clonotype165aKO	2	TRB:CASSLEDNSPLYF;TRB:CASSLRDSAETLYF;TRA:CARLTSGGNYKPTF
clone_144_aK0	clonotype167aKO	2	TRB:CASSFGQNYAEQFF;TRB:CAWSSRLGSNTGQLYF;TRA:CVLSAPNTNKVVF
clone_145_aK0	clonotype168aKO	2	TRB:CASSSGGTETLYF;TRA:CVLGEANYNVLYF
clone_146_aK0	clonotype169aKO	2	TRB:CASSLTGGQNTLYF;TRA:CALSPSNYNVLYF
clone_147_aK0	clonotype170aKO	2	TRB:CASSGTGGNYAEQFF;TRA:CATDATSSSFSKLVF
clone_148_aK0	clonotype171aKO	2	TRB:CASSQEGRTNTGQLYF;TRA:CAVSAGNTGKLTF
clone_149_aK0	clonotype172aKO	2	TRB:CASSDAAETLYF;TRB:CASSIEGQNAEQFF;TRA:CAAMATGGNNKLTF;TRA:CALSRGSALGRLHF
clone_150_aK0	clonotype174aKO	2	TRB:CASSLGQGGNTLYF;TRA:CAMREGSNTGKLTF;TRA:CAVKTASLGKLQF
clone_151_aK0	clonotype176aKO	2	TRB:CASSFQGGNTEVFF;TRA:CAASERRYNQGKLIF
clone_152_aK0	clonotype178aKO	2	TRB:CAWSPTSGTGGLDTQYF;TRA:CAVSEPSSGSWQLIF
clone_153_aK0	clonotype180aKO	2	TRB:CASSPLQGANTGQLYF;TRA:CALSGQGTGSKLSF
clone_154_aK0	clonotype183aKO	2	TRB:CASTPDWGGVAEQFF;TRA:CALSDVTGSGGKLTL
clone_155_aK0	clonotype184aKO	2	TRB:CTCSVGGRYAEQFF;TRA:CALTPGGSNAKLTF
clone_156_aK0	clonotype185aKO	2	TRB:CASSLYGGNTGQLYF;TRA:CAASTGSFNKLTF
clone_157_aK0	clonotype187aKO	2	TRB:CTCSARGGAAEQFF;TRA:CALSRNNYAQGLTF
clone_158_aK0	clonotype188aKO	2	TRB:CASSPLDRGVEQYF;TRA:CALGDDSNNRIFF
clone_159_aK0	clonotype189aKO	2	TRB:CTCSARTGVNERLFF;TRA:CAVSGGSGTYQRF
clone_160_aK0	clonotype192aKO	2	TRB:CASSSGTVFSNERLFF;TRA:CAASTGNTGKLIF
clone_161_aK0	clonotype194aKO	2	TRB:CTCSASQGERNSPLYF;TRA:CALKNYNQGKLIF
clone_162_aK0	clonotype196aKO	2	TRB:CASGTGDSDYTF;TRA:CAASEGGNYKYVF
clone_163_aK0	clonotype197aKO	2	TRB:CASGEQGRNSPLYF;TRA:CAAERGSSGNKLIF
clone_164_aK0	clonotype198aKO	2	TRB:CASSLDNSGNTLYF;TRA:CAVSRATSSGQKLVF
clone_165_aK0	clonotype199aKO	2	TRB:CASGDADRANSDYTF;TRA:CAAEANSGTYQRF;TRA:CAAHGGSWQLIF
clone_166_aK0	clonotype201aKO	2	TRB:CASSFGGGLNYAEQFF;TRB:CGARGGRRDTQYF;TRA:CALSVNNNNAPRF;TRA:CAVRVMATGGNNKLTF
clone_167_aK0	clonotype83aKO	2	TRB:CASGDTGGNYAEQFF
clone_168_aK0	clonotype87aKO	2	TRB:CASSLDAEQFF;TRA:CAARRAGNTGKLIF
clone_169_aK0	clonotype91aKO	2	TRB:CASSAAGQFSNERLFF;TRB:CASSSGGSYNSPLYF;TRA:CALGEGQGGRALIF
clone_170_aK0	clonotype95aKO	2	TRB:CASSQTGASAETLYF;TRA:CAAEAFSNYNVLYF
clone_171_aK0	clonotype1000aKO	1	TRB:CASSQEGHSNERLFF;TRA:CAASEGGRALIF
clone_172_aK0	clonotype1002aKO	1	TRB:CASSPLGINQDTQYF;TRA:CAAMDSNYQLIW
clone_173_aK0	clonotype1003aKO	1	TRB:CASSLRDRGAETLYF;TRA:CILRASNQGGSAKLIF
clone_174_aK0	clonotype1005aKO	1	TRB:CASSKGISNERLFF;TRA:CAMERRTNTGKLTF
clone_175_aK0	clonotype1007aKO	1	TRB:CASSLTGGNEQYF;TRA:CAIDRDGSGTYQRF
clone_176_aK0	clonotype1008aKO	1	TRB:CASSFGGAETLYF;TRA:CAVGGYAQGLTF
clone_177_aK0	clonotype1009aKO	1	TRB:CASSEGRGSAETLYF;TRA:CAAGATSSGQKLVF
clone_178_aK0	clonotype1010aKO	1	TRB:CASSDLGGRLAEQFF;TRA:CAVSGNTNKVVF
clone_179_aK0	clonotype1011aKO	1	TRB:CASSDWDRGYAEQFF;TRA:CATGNAGAKLTF
clone_180_aK0	clonotype1012aKO	1	TRB:CASGADRGRAETLYF;TRA:CAAFSGGSNAKLTF
clone_181_aK0	clonotype1013aKO	1	TRB:CASSQDSYNSPLYF;TRA:CAAMTNSAGNKLTF
clone_182_aK0	clonotype1014aKO	1	TRB:CASSQDDSQNTLYF;TRA:CAAEANNAGAKLTF
clone_183_aK0	clonotype1015aKO	1	TRB:CASSQVGGRHEQYF;TRA:CAVSFSNNRIFF
clone_184_aK0	clonotype1016aKO	1	TRB:CASSPTISNERLFF;TRA:CAAEAAGNTGKLIF
clone_185_aK0	clonotype1017aKO	1	TRB:CTCSADRTEVFF;TRA:CAAEEGSALGRLHF
clone_186_aK0	clonotype1018aKO	1	TRB:CASSMRNEQYF;TRA:CALTSGGNYKPTF
clone_187_aK0	clonotype1019aKO	1	TRB:CASSQNRVNYAEQFF;TRA:CALSPITGNTGKLIF;TRA:CAVNAGAKLTF
clone_188_aK0	clonotype1020aKO	1	TRB:CASSQDIYNYAEQFF;TRB:CASSRSGINTEVFF;TRA:CAAHSNNRIFF;TRA:CAVSMWQGGRALIF
clone_189_aK0	clonotype1021aKO	1	TRB:CASSQDRLGKNTLYF;TRA:CALGLNSNNRIFF
clone_190_aK0	clonotype1022aKO	1	TRB:CASSPAGGKEQYF;TRA:CAASRGSNYKLTF
clone_191_aK0	clonotype1023aKO	1	TRB:CASSSTGAYEQYF;TRA:CAARTGNTGKLIF
clone_192_aK0	clonotype1024aKO	1	TRB:CASSLGRQNTLYF;TRA:CAENTEGADRLTF
clone_193_aK0	clonotype1025aKO	1	TRB:CASSLPGTNERLFF;TRB:CASSSWTTNTEVFF;TRA:CASNAGAKLTF
clone_194_aK0	clonotype1026aKO	1	TRB:CASSFTGDTEVFF;TRA:CAAEAFGANTGKLTF
clone_195_aK0	clonotype1027aKO	1	TRB:CASSLGGAYEQYF;TRA:CAVTNYNQGKLIF
clone_196_aK0	clonotype1028aKO	1	TRB:CASSYTGDAEQFF;TRA:CALGNYQLIW
clone_197_aK0	clonotype1029aKO	1	TRB:CASSPLGGHEQYF;TRB:CASSSGQPNTEVFF;TRA:CALDPHDTNAYKVIF;TRA:CAVSVAGGYKVVF
clone_198_aK0	clonotype1030aKO	1	TRB:CASSHRGRSQNTLYF;TRA:CAVSMPGYQNFYF
clone_199_aK0	clonotype1032aKO	1	TRB:CASSQERGNSPLYF;TRA:CGRGGSALGRLHF
clone_200_aK0	clonotype1033aKO	1	TRB:CASSQTGGYAEQFF;TRA:CASSGTGGYKVVF
clone_201_aK0	clonotype1034aKO	1	TRB:CASSLTGAGNTLYF;TRA:CALRRDSGTYQRF
clone_202_aK0	clonotype1035aKO	1	TRB:CTCSAKYTEVFF;TRA:CAASQDYAQGLTF
clone_203_aK0	clonotype1036aKO	1	TRB:CAKRQGSSAETLYF;TRA:CAVSADSNNRIFF
clone_204_aK0	clonotype1037aKO	1	TRB:CASSSPGNNSPLYF;TRA:CARNYAQGLTF
clone_205_aK0	clonotype1039aKO	1	TRB:CASSQEDRGGNTQYF;TRA:CAVSEGPGGRALIF
clone_206_aK0	clonotype1040aKO	1	TRB:CASSQDHRNTGQLYF;TRA:CAVRDDSGYNKLTF
clone_207_aK0	clonotype1041aKO	1	TRB:CASGADRGRAETLYF;TRB:CAWSLWTGGDTGQLYF;TRA:CALEGYNQGKLIF
clone_208_aK0	clonotype1042aKO	1	TRB:CASSRRDWGGEQYF;TRA:CAARAGTGSKLSF
clone_209_aK0	clonotype1044aKO	1	TRB:CASSLDPGYEQYF;TRA:CAASRGNEKITF
clone_210_aK0	clonotype1045aKO	1	TRB:CASSFSYNSPLYF;TRA:CALGANNNNAPRF
clone_211_aK0	clonotype1046aKO	1	TRB:CASSLAWGNTLYF;TRA:CAASHSNNRIFF
clone_212_aK0	clonotype1047aKO	1	TRB:CASSLGNQDTQYF;TRA:CAVKATGGNNKLTF
clone_213_aK0	clonotype1048aKO	1	TRB:CASRGYSGNTLYF;TRA:CALSDGTGGYKVVF
clone_214_aK0	clonotype1049aKO	1	TRB:CASRGQGYNYAEQFF;TRA:CATGANYGNEKITF
clone_215_aK0	clonotype1050aKO	1	TRB:CASSEGTGGFQNTLYF;TRA:CAVRSNYNVLYF
clone_216_aK0	clonotype1051aKO	1	TRB:CASSQDRRQDTQYF;TRA:CAMGLNTGGLSGKLTF
clone_217_aK0	clonotype1052aKO	1	TRB:CASSHTTANTEVFF;TRA:CAVRGSSGSWQLIF
clone_218_aK0	clonotype1053aKO	1	TRB:CASSPQGDNQAPLF;TRA:CATDARTNTGKLTF
clone_219_aK0	clonotype1054aKO	1	TRB:CASSYGTTNSDYTF;TRA:CAVSTGTGGYKVVF
clone_220_aK0	clonotype1055aKO	1	TRB:CASSFQAATGQLYF;TRA:CAARMNYNQGKLIF
clone_221_aK0	clonotype1056aKO	1	TRB:CASSSGTGFSPLYF;TRA:CVLGEPSGSWQLIF
clone_222_aK0	clonotype1057aKO	1	TRB:CASSLSNSGNTLYF;TRA:CAVSAPHSGSWQLIF
clone_223_aK0	clonotype1059aKO	1	TRB:CASSSWGEDTQYF;TRB:CASSTISNERLFF;TRA:CATDYNVGDNSKLIW
clone_224_aK0	clonotype1060aKO	1	TRB:CASSLGQKDTQYF;TRA:CAARDSGYNKLTF
clone_225_aK0	clonotype1061aKO	1	TRB:CASSSDSQNTLYF;TRA:CAASEPNYNQGKLIF
clone_226_aK0	clonotype1062aKO	1	TRB:CASSWRANTEVFF;TRA:CAAHEEGNMGYKLTF
clone_227_aK0	clonotype1064aKO	1	TRB:CASSLDRDYEQYF;TRA:CAASRQAGNTGKLIF
clone_228_aK0	clonotype1065aKO	1	TRB:CASSGIWGGQDTQYF;TRA:CALGGTGSKLSF
clone_229_aK0	clonotype1066aKO	1	TRB:CASSDWGSSSAETLYF;TRA:CAADNTNTGKLTF
clone_230_aK0	clonotype1067aKO	1	TRB:CASSSPGRYAEQFF;TRA:CALSDGGYKVVF
clone_231_aK0	clonotype1068aKO	1	TRB:CASSLGKNTLYF;TRB:CASSPGKENSPLYF;TRA:CALSMGNSAGNKLTF
clone_232_aK0	clonotype1070aKO	1	TRB:CASSQDRGRGERLFF;TRA:CALGHDSGYNKLTF
clone_233_aK0	clonotype1071aKO	1	TRB:CASSQDTGGNSDYTF;TRA:CAVSPSSGSWQLIF
clone_234_aK0	clonotype1072aKO	1	TRB:CASSQGQGSNERLFF;TRB:CASTGHKNYAEQFF;TRA:CALSEWSNYQLIW;TRA:CAVSPPTASLGKLQF
clone_235_aK0	clonotype1073aKO	1	TRB:CASSSEQSYEQYF;TRA:CALGADQGGRALIF
clone_236_aK0	clonotype1074aKO	1	TRB:CASSSGLVYEQYF;TRA:CAVSTYGSSGNKLIF
clone_237_aK0	clonotype1075aKO	1	TRB:CASSLGGNERLFF;TRA:CALGVNYNQGKLIF
clone_238_aK0	clonotype1077aKO	1	TRB:CASSPRDRGGQYF;TRA:CAASEGGSNAKLTF
clone_239_aK0	clonotype1079aKO	1	TRB:CASSRRIGERLFF;TRA:CAASEHGRSGSWQLIF
clone_240_aK0	clonotype1080aKO	1	TRB:CASSDRGQNSGNTLYF;TRA:CAVSGYQGGRALIF
clone_241_aK0	clonotype1081aKO	1	TRB:CASSQEGLNTEVFF;TRA:CALGEPGGNYKPTF
clone_242_aK0	clonotype1082aKO	1	TRB:CASSSTYSGNTLYF;TRA:CALVMSNYNVLYF
clone_243_aK0	clonotype1083aKO	1	TRB:CASSLGPGEDTQYF;TRA:CALSGTTGYQNFYF
clone_244_aK0	clonotype1084aKO	1	TRB:CASSFGQGVYEQYF;TRA:CVVGDRGSALGRLHF
clone_245_aK0	clonotype1085aKO	1	TRB:CASSQDWGGQDTQYF;TRA:CALAPSNSNNRIFF
clone_246_aK0	clonotype1086aKO	1	TRB:CASSQETGANSDYTF;TRA:CALGGNAGAKLTF
clone_247_aK0	clonotype1087aKO	1	TRB:CASSPGLGSAETLYF;TRA:CVVGDRGSALGRLHF
clone_248_aK0	clonotype1088aKO	1	TRB:CASSSSPYAEQFF;TRA:CAVALTNSAGNKLTF
clone_249_aK0	clonotype1089aKO	1	TRB:CASSLVGNERLFF;TRA:CALRENNNAGAKLTF
clone_250_aK0	clonotype108aKO	1	TRB:CASSGGGNSPLYF;TRA:CAASIGDNSKLIW
clone_251_aK0	clonotype1091aKO	1	TRB:CASSRGGGDTEVFF;TRA:CALGDKTSSGQKLVF
clone_252_aK0	clonotype1092aKO	1	TRB:CASSLWSNTEVFF;TRA:CAASTYGSSGNKLIF
clone_253_aK0	clonotype1093aKO	1	TRB:CASSPGSNQAPLF;TRA:CALMTNSAGNKLTF
clone_254_aK0	clonotype1094aKO	1	TRB:CASSDWGANTGQLYF;TRA:CAVNLNNNAGAKLTF
clone_255_aK0	clonotype1095aKO	1	TRB:CTCSGTAYEQYF;TRA:CVVGDRGSALGRLHF
clone_256_aK0	clonotype1096aKO	1	TRB:CTCSGSAETLYF;TRA:CAMREANTGANTGKLTF
clone_257_aK0	clonotype1097aKO	1	TRB:CASSQEGKNTGQLYF;TRA:CAMRAPQGGRALIF
clone_258_aK0	clonotype1098aKO	1	TRB:CASSQDRLAQDTQYF;TRA:CALSELGTNTGKLTF
clone_259_aK0	clonotype1099aKO	1	TRB:CASSPPWGVQDTQYF;TRA:CAMREGDTGNYKYVF
clone_260_aK0	clonotype1100aKO	1	TRB:CASSRGGARYEQYF;TRB:CTCSAGSGNTLYF;TRA:CALGRSSNTNKVVF
clone_261_aK0	clonotype1101aKO	1	TRB:CASSGDSQDTQYF;TRA:CALSPLASSSFSKLVF
clone_262_aK0	clonotype1102aKO	1	TRB:CASGDTDRGNTLYF;TRB:CASSLAGGDEQYF;TRA:CALSDQYNAGAKLTF;TRA:CAMRESTGSGGKLTL
clone_263_aK0	clonotype1103aKO	1	TRB:CASSLTAYAEQFF;TRA:CAVSDANTGANTGKLTF
clone_264_aK0	clonotype1104aKO	1	TRB:CASSLWTQQNTLYF;TRA:CAMREEGTEGADRLTF
clone_265_aK0	clonotype1105aKO	1	TRB:CASSWGQNERLFF;TRA:CAMRKNTGANTGKLTF
clone_266_aK0	clonotype1106aKO	1	TRB:CASSLRVNTEVFF;TRA:CAAGNYNVLYF
clone_267_aK0	clonotype1107aKO	1	TRB:CASGDHRIANSDYTF;TRA:CALTDLPGTGSNRLTF
clone_268_aK0	clonotype1109aKO	1	TRB:CASSLEENTEVFF;TRA:CAASGSNNRIFF
clone_269_aK0	clonotype1110aKO	1	TRB:CASSSNANTEVFF;TRA:CALSDQDSGGSNYKLTF
clone_270_aK0	clonotype1111aKO	1	TRB:CASSPLDRGVEQYF;TRB:CASSSGQGTEVFF;TRA:CAARGSNAKLTF
clone_271_aK0	clonotype1113aKO	1	TRB:CASRPDRGREQYF;TRA:CAAMATGGNNKLTF
clone_272_aK0	clonotype1114aKO	1	TRB:CASSLGRSYEQYF;TRA:CAARVNTGNYKYVF
clone_273_aK0	clonotype1115aKO	1	TRB:CASSRDWGGDTLYF;TRA:CAARGAGGYKVVF
clone_274_aK0	clonotype1116aKO	1	TRB:CASSKQDSNERLFF;TRA:CAARTQVVGQLTF
clone_275_aK0	clonotype1117aKO	1	TRB:CASSPWRGNTEVFF;TRA:CAASESNYAQGLTF
clone_276_aK0	clonotype1119aKO	1	TRB:CASSPDWGDSYEQYF;TRA:CAASEASNNRIFF
clone_277_aK0	clonotype1120aKO	1	TRB:CASSPDWGNQDTQYF;TRA:CAASRSSGSWQLIF
clone_278_aK0	clonotype1121aKO	1	TRB:CASSDWGQGEAERLFF;TRA:CAASDRGGSAKLIF
clone_279_aK0	clonotype1122aKO	1	TRB:CARERGARAETLYF;TRB:CASSQEGTGGAETLYF;TRA:CAAYNTGNYKYVF
clone_280_aK0	clonotype1123aKO	1	TRB:CTCSTQGWEQYF;TRA:CAASETGNYKYVF
clone_281_aK0	clonotype1124aKO	1	TRB:CASGLQGDNQAPLF;TRB:CASRQGANERLFF;TRA:CAAGSLNQGGSAKLIF
clone_282_aK0	clonotype1125aKO	1	TRB:CASSDGGFSSYEQYF;TRA:CAASKAGSGGKLTL
clone_283_aK0	clonotype1126aKO	1	TRB:CASSQDTANSDYTF;TRA:CAASFGSSGNKLIF
clone_284_aK0	clonotype1127aKO	1	TRB:CASSRGQYAEQFF;TRA:CAASAVGSSGNKLIF
clone_285_aK0	clonotype1129aKO	1	TRB:CASSQEPDSGNTLYF;TRA:CALSDRYNKLTF
clone_286_aK0	clonotype1130aKO	1	TRB:CASSTDGFYEQYF;TRA:CALSDSNYQLIW
clone_287_aK0	clonotype1131aKO	1	TRB:CASSFGTKDTQYF;TRA:CALSRNSNNRIFF
clone_288_aK0	clonotype1132aKO	1	TRB:CASSLGQAETLYF;TRA:CALRGTGNTGKLIF
clone_289_aK0	clonotype1133aKO	1	TRB:CASSRDNYAEQFF;TRA:CALTYVGDNSKLIW
clone_290_aK0	clonotype1134aKO	1	TRA:CVVGAGSNYQLIW
clone_291_aK0	clonotype1135aKO	1	TRA:CAASEHSNMGYKLTF
clone_292_aK0	clonotype1136aKO	1	TRA:CAASEHSNMGYKLTF
clone_293_aK0	clonotype1137aKO	1	TRA:CAASEHSNMGYKLTF
clone_294_aK0	clonotype1140aKO	1	TRB:CASSTGGSDYTF
clone_295_aK0	clonotype1141aKO	1	TRB:CASSIRGLEQYF
clone_296_aK0	clonotype1142aKO	1	TRA:CVLGPFNAGAKLTF
clone_297_aK0	clonotype1144aKO	1	TRA:CALSDPGYQNFYF
clone_298_aK0	clonotype1145aKO	1	TRA:CAVSDPGGYKVVF
clone_299_aK0	clonotype1147aKO	1	TRA:CAASYQGGRALIF
clone_300_aK0	clonotype1148aKO	1	TRA:CAASYQGGRALIF
clone_301_aK0	clonotype1149aKO	1	TRB:CASSSGTGNTGQLYF
clone_302_aK0	clonotype1150aKO	1	TRB:CASRDTNSYNSPLYF
clone_303_aK0	clonotype1151aKO	1	TRB:CASSNRGDNNQAPLF
clone_304_aK0	clonotype1153aKO	1	TRB:CASSSGGSYNSPLYF
clone_305_aK0	clonotype1154aKO	1	TRB:CASSLQGQANSDYTF
clone_306_aK0	clonotype1156aKO	1	TRB:CASSLSRASAETLYF
clone_307_aK0	clonotype1157aKO	1	TRB:CASSLSLSNQDTQYF
clone_308_aK0	clonotype1158aKO	1	TRB:CASSLWDSSGNTLYF
clone_309_aK0	clonotype1159aKO	1	TRB:CASSQDGGDNYAEQFF
clone_310_aK0	clonotype1160aKO	1	TRB:CASSQEGHNNNQAPLF
clone_311_aK0	clonotype1161aKO	1	TRB:CASSQEGLGGAETLYF
clone_312_aK0	clonotype1162aKO	1	TRB:CASSQEGRTDNERLFF
clone_313_aK0	clonotype1163aKO	1	TRB:CASSQEGRTDNERLFF
clone_314_aK0	clonotype1164aKO	1	TRB:CASSQEGGGRSYEQYF
clone_315_aK0	clonotype1165aKO	1	TRB:CASSQDMGQGAERLFF
clone_316_aK0	clonotype1166aKO	1	TRB:CASSQDWGRAGNTLYF
clone_317_aK0	clonotype1167aKO	1	TRB:CASSQAGTGGSERLFF
clone_318_aK0	clonotype1168aKO	1	TRB:CASSPLQGANTGQLYF
clone_319_aK0	clonotype1169aKO	1	TRB:CASSPLQGANTGQLYF
clone_320_aK0	clonotype1170aKO	1	TRB:CASSPRLGGYQDTQYF
clone_321_aK0	clonotype1171aKO	1	TRA:CAVSVNTGYQNFYF
clone_322_aK0	clonotype1172aKO	1	TRA:CVLTITGNTGKLIF
clone_323_aK0	clonotype1173aKO	1	TRA:CVLSANTGYQNFYF
clone_324_aK0	clonotype1174aKO	1	TRA:CVLSANTGYQNFYF
clone_325_aK0	clonotype1175aKO	1	TRA:CAVRDPPWGSSGNKLIF
clone_326_aK0	clonotype1176aKO	1	TRB:CAWSPTSGTGGLDTQYF
clone_327_aK0	clonotype1177aKO	1	TRB:CAWSPTSGTGGLDTQYF
clone_328_aK0	clonotype1178aKO	1	TRB:CAWSPTSGTGGLDTQYF
clone_329_aK0	clonotype1179aKO	1	TRB:CAWSLGWGGSSAETLYF
clone_330_aK0	clonotype1180aKO	1	TRA:CALSGQGGRALIF
clone_331_aK0	clonotype1181aKO	1	TRA:CALSGQGGRALIF
clone_332_aK0	clonotype1182aKO	1	TRA:CALGTSNTNKVVF
clone_333_aK0	clonotype1183aKO	1	TRA:CALGETNYNVLYF
clone_334_aK0	clonotype1184aKO	1	TRB:CASSNRGNQDTQYF
clone_335_aK0	clonotype1185aKO	1	TRB:CASSNWGNYAEQFF
clone_336_aK0	clonotype1186aKO	1	TRB:CASSNWGNYAEQFF
clone_337_aK0	clonotype1187aKO	1	TRB:CASSSQRGQNTLYF
clone_338_aK0	clonotype1188aKO	1	TRB:CASSPRGGNTEVFF
clone_339_aK0	clonotype1189aKO	1	TRB:CASSPDRANTEVFF
clone_340_aK0	clonotype1190aKO	1	TRB:CASSRDRGAETLYF
clone_341_aK0	clonotype1191aKO	1	TRB:CASSLRDRKYEQYF
clone_342_aK0	clonotype1192aKO	1	TRB:CASSSPTDTGQLYF
clone_343_aK0	clonotype1193aKO	1	TRB:CASSSLKNTGQLYF
clone_344_aK0	clonotype1194aKO	1	TRB:CASSSGQGYAEQFF
clone_345_aK0	clonotype1195aKO	1	TRB:CASSWDWGVDTQYF
clone_346_aK0	clonotype1196aKO	1	TRB:CASSWGQGGTEVFF
clone_347_aK0	clonotype1197aKO	1	TRB:CASSLKLGENTLYF
clone_348_aK0	clonotype1198aKO	1	TRB:CASSLESRGRAQYF
clone_349_aK0	clonotype1199aKO	1	TRB:CASSLESRGRAQYF
clone_350_aK0	clonotype1200aKO	1	TRB:CASSLESRGRAQYF
clone_351_aK0	clonotype1201aKO	1	TRB:CASSLEGNTGQLYF
clone_352_aK0	clonotype1202aKO	1	TRB:CASSLEGRGNTLYF
clone_353_aK0	clonotype1203aKO	1	TRB:CASSLEGRGNTLYF
clone_354_aK0	clonotype1204aKO	1	TRB:CASSLDRGGTEVFF
clone_355_aK0	clonotype1205aKO	1	TRB:CASSLEGSNTEVFF
clone_356_aK0	clonotype1206aKO	1	TRB:CASSLDGSQDTQYF
clone_357_aK0	clonotype1208aKO	1	TRB:CASSLAGDYAEQFF
clone_358_aK0	clonotype1209aKO	1	TRB:CASSLALRNSDYTF
clone_359_aK0	clonotype1210aKO	1	TRB:CASSLGQSAETLYF
clone_360_aK0	clonotype1211aKO	1	TRB:CASSLGTGTYEQYF
clone_361_aK0	clonotype1212aKO	1	TRB:CASSLGRQGDTQYF
clone_362_aK0	clonotype1213aKO	1	TRB:CASSLGGNYAEQFF
clone_363_aK0	clonotype1215aKO	1	TRB:CASSLVGQNTEVFF
clone_364_aK0	clonotype1216aKO	1	TRB:CASSLVWGAETLYF
clone_365_aK0	clonotype1217aKO	1	TRB:CASSFRGSSYEQYF
clone_366_aK0	clonotype1218aKO	1	TRB:CASSRDRSAETLYF
clone_367_aK0	clonotype1219aKO	1	TRB:CASSSGTGGAEVFF
clone_368_aK0	clonotype1220aKO	1	TRB:CASSRMGESNERLFF
clone_369_aK0	clonotype1221aKO	1	TRB:CASSPLDRGVEQYF
clone_370_aK0	clonotype1222aKO	1	TRB:CASSPLDRGVEQYF
clone_371_aK0	clonotype1223aKO	1	TRB:CASSPGTGGYEQYF
clone_372_aK0	clonotype1224aKO	1	TRB:CASSGTGGYAEQFF
clone_373_aK0	clonotype1225aKO	1	TRB:CASSLEGGQDTQYF
clone_374_aK0	clonotype1226aKO	1	TRB:CASSLGDWGVEQYF
clone_375_aK0	clonotype1227aKO	1	TRB:CASSLGGQYAEQFF
clone_376_aK0	clonotype1228aKO	1	TRB:CASSLGGQYAEQFF
clone_377_aK0	clonotype1229aKO	1	TRB:CASSLGGEQNTLYF
clone_378_aK0	clonotype1230aKO	1	TRB:CASSLGGEQNTLYF
clone_379_aK0	clonotype1232aKO	1	TRB:CASSFDNNNQAPLF
clone_380_aK0	clonotype1233aKO	1	TRB:CASSLGGTGVEQYF
clone_381_aK0	clonotype1234aKO	1	TRB:CASSPGTGENTLYF
clone_382_aK0	clonotype1235aKO	1	TRB:CASSDWGGAREQYF
clone_383_aK0	clonotype1237aKO	1	TRB:CASSPDSNYAEQFF
clone_384_aK0	clonotype1238aKO	1	TRB:CASSRGHSNSDYTF
clone_385_aK0	clonotype1240aKO	1	TRB:CASSLQNSNERLFF
clone_386_aK0	clonotype1241aKO	1	TRB:CASSLDKNTGQLYF
clone_387_aK0	clonotype1242aKO	1	TRB:CASSLDNSGNTLYF
clone_388_aK0	clonotype1243aKO	1	TRB:CASSLDRAGSDYTF
clone_389_aK0	clonotype1244aKO	1	TRB:CASSLSTGNTEVFF
clone_390_aK0	clonotype1245aKO	1	TRB:CASSLQNYNSPLYF
clone_391_aK0	clonotype1246aKO	1	TRB:CASSDWGGGREQYF
clone_392_aK0	clonotype1247aKO	1	TRB:CASSYRDRVTEVFF
clone_393_aK0	clonotype1248aKO	1	TRB:CASRGQSSQNTLYF
clone_394_aK0	clonotype1249aKO	1	TRB:CASRDRGLQNTLYF
clone_395_aK0	clonotype124aKO	1	TRB:CASSLGGRSAETLYF;TRA:CAAEALSNYNVLYF
clone_396_aK0	clonotype1250aKO	1	TRB:CASSLGTANTEVFF
clone_397_aK0	clonotype1251aKO	1	TRB:CASSFHRGQDTQYF
clone_398_aK0	clonotype1252aKO	1	TRB:CASSFHRGQDTQYF
clone_399_aK0	clonotype1254aKO	1	TRB:CASSPDWGGYEQYF
clone_400_aK0	clonotype1255aKO	1	TRB:CASSSDWGDYEQYF
clone_401_aK0	clonotype1256aKO	1	TRB:CASSPGTYYAEQFF
clone_402_aK0	clonotype1257aKO	1	TRB:CASSRDSSQNTLYF
clone_403_aK0	clonotype1260aKO	1	TRB:CASSFDTSSYEQYF
clone_404_aK0	clonotype1261aKO	1	TRB:CASSLGQGAERLFF
clone_405_aK0	clonotype1262aKO	1	TRB:CASSLGGDTGQLYF
clone_406_aK0	clonotype1263aKO	1	TRB:CASSFSVSNERLFF
clone_407_aK0	clonotype1264aKO	1	TRB:CASSDKGQISNERLFF
clone_408_aK0	clonotype1265aKO	1	TRB:CASSERLGGVQDTQYF
clone_409_aK0	clonotype1266aKO	1	TRB:CASSDRDWALQNTLYF
clone_410_aK0	clonotype1267aKO	1	TRB:CASSDGTGGLYTEVFF
clone_411_aK0	clonotype1268aKO	1	TRB:CASGDAGRGGDTEVFF
clone_412_aK0	clonotype1269aKO	1	TRB:CASGDAGQGANTEVFF
clone_413_aK0	clonotype1270aKO	1	TRB:CASGAAGADSGNTLYF
clone_414_aK0	clonotype1271aKO	1	TRB:CASSDPGLGESSYEQYF
clone_415_aK0	clonotype1272aKO	1	TRB:CASSFSGESLSNERLFF
clone_416_aK0	clonotype1273aKO	1	TRB:CASSQSLLGGDTLYF
clone_417_aK0	clonotype1274aKO	1	TRB:CASSQEADSGNTLYF
clone_418_aK0	clonotype1275aKO	1	TRB:CASSQEGTGPETLYF
clone_419_aK0	clonotype1276aKO	1	TRB:CASSRDNSYNSPLYF
clone_420_aK0	clonotype1277aKO	1	TRB:CASSQAGSSAETLYF
clone_421_aK0	clonotype1278aKO	1	TRB:CASSQAGSSAETLYF
clone_422_aK0	clonotype1279aKO	1	TRB:CASSQTGRAGNTLYF
clone_423_aK0	clonotype1280aKO	1	TRB:CASSPRDWTSGTQYF
clone_424_aK0	clonotype1281aKO	1	TRB:CASSPDWGNYAEQFF
clone_425_aK0	clonotype1282aKO	1	TRB:CASSPGTTSQNTLYF
clone_426_aK0	clonotype1283aKO	1	TRB:CASSLRDRGPSDYTF
clone_427_aK0	clonotype1284aKO	1	TRB:CASSLGGASAETLYF
clone_428_aK0	clonotype1285aKO	1	TRB:CASSLGGASAETLYF
clone_429_aK0	clonotype1286aKO	1	TRB:CASSLGGASAETLYF
clone_430_aK0	clonotype1287aKO	1	TRB:CASSFRDKGNTEVFF
clone_431_aK0	clonotype1288aKO	1	TRB:CSSSQGGNTGQLYF
clone_432_aK0	clonotype1289aKO	1	TRB:CTCRTGENTEVFF
clone_433_aK0	clonotype128aKO	1	TRB:CASSSGTANTEVFF;TRA:CVLGDGSNMGYKLTF
clone_434_aK0	clonotype1290aKO	1	TRB:CTCSTGGQNTLYF
clone_435_aK0	clonotype1291aKO	1	TRB:CTCSANRNSDYTF
clone_436_aK0	clonotype1293aKO	1	TRB:CTCSADYYAEQFF
clone_437_aK0	clonotype1295aKO	1	TRB:CTCSAVGGAEQFF
clone_438_aK0	clonotype1296aKO	1	TRB:CTCSAGQKNTLYF
clone_439_aK0	clonotype1297aKO	1	TRB:CTCSAWGGDEQYF
clone_440_aK0	clonotype1299aKO	1	TRB:CASSSGLGGYEQYF;TRA:CAIDSNNRIFF
clone_441_aK0	clonotype1300aKO	1	TRB:CASSLSPGRNSPLYF;TRA:CILRVTGSGGKLTL
clone_442_aK0	clonotype1301aKO	1	TRB:CASSRPGGVSAETLYF;TRA:CAAANSGTYQRF
clone_443_aK0	clonotype1302aKO	1	TRB:CASSLTPLNSDYTF;TRA:CAADANTGKLTF
clone_444_aK0	clonotype1303aKO	1	TRB:CASSLERPNTEVFF;TRA:CATDHYSNNRLTL
clone_445_aK0	clonotype1304aKO	1	TRB:CASSSTDSYNSPLYF;TRA:CAIEGNAYKVIF
clone_446_aK0	clonotype1305aKO	1	TRB:CTCSAALNTEVFF;TRA:CADNNAGAKLTF
clone_447_aK0	clonotype1306aKO	1	TRB:CASSIWGREQYF;TRA:CAIDIGYAQGLTF
clone_448_aK0	clonotype1307aKO	1	TRB:CASSAGDDTQYF;TRA:CATDYAQGLTF
clone_449_aK0	clonotype1308aKO	1	TRB:CASSPQLSGNTLYF;TRA:CALVNNAGAKLTF
clone_450_aK0	clonotype1309aKO	1	TRB:CASSLGTGGYEQYF;TRA:CALADTNAYKVIF
clone_451_aK0	clonotype1310aKO	1	TRB:CASSGWGGQNTLYF;TRA:CALETSSNNRIFF
clone_452_aK0	clonotype1311aKO	1	TRB:CASSLGQSSYEQYF;TRA:CAARNTGKLIF
clone_453_aK0	clonotype1312aKO	1	TRB:CASSLGNSGNTLYF;TRA:CAIDPTNAYKVIF
clone_454_aK0	clonotype1314aKO	1	TRB:CASSPSRGGNTLYF;TRA:CAMGRNNNNAPRF
clone_455_aK0	clonotype1315aKO	1	TRB:CASGDYRGYSGNTLYF;TRB:CASSADWVNQDTQYF;TRA:CALGSSGSWQLIF;TRA:CAMERSQGGRALIF
clone_456_aK0	clonotype1317aKO	1	TRB:CASSSTGGNSDYTF;TRA:CAVDRGSALGRLHF
clone_457_aK0	clonotype1318aKO	1	TRB:CASSLGGRRDTQYF;TRA:CAGRYNQGKLIF
clone_458_aK0	clonotype1319aKO	1	TRB:CASSLGQPNTEVFF;TRA:CALMDSNYQLIW;TRA:CAMREGHYNQGKLIF
clone_459_aK0	clonotype1320aKO	1	TRB:CASRGLGGPETLYF;TRA:CAARYGNEKITF
clone_460_aK0	clonotype1324aKO	1	TRB:CASRPTGERLFF;TRA:CAALSSGSWQLIF
clone_461_aK0	clonotype1325aKO	1	TRB:CASSSGVSNTGQLYF;TRA:CAASLNSGTYQRF
clone_462_aK0	clonotype1326aKO	1	TRB:CASSQEQGAGAETLYF;TRA:CAVGDTNAYKVIF
clone_463_aK0	clonotype1327aKO	1	TRB:CASSPGTLYAEQFF;TRA:CAVRAGGNNKLTF
clone_464_aK0	clonotype1328aKO	1	TRB:CASSAGQGNERLFF;TRA:CAAGRGNSAGNKLTF
clone_465_aK0	clonotype1329aKO	1	TRB:CASSGDWGENTLYF;TRA:CAVSMTGGYKVVF
clone_466_aK0	clonotype1331aKO	1	TRB:CASSFGGNQDTQYF;TRA:CAVSGNNNAPRF
clone_467_aK0	clonotype1332aKO	1	TRB:CASSPQGNQDTQYF;TRA:CAMVAATGGNNKLTF
clone_468_aK0	clonotype1333aKO	1	TRB:CASSSRDRNTEVFF;TRA:CAASPQGGRALIF
clone_469_aK0	clonotype1334aKO	1	TRB:CASSSTGLQDTQYF;TRA:CAATSGGNYKPTF
clone_470_aK0	clonotype1335aKO	1	TRB:CASSPPGQGTTLYF;TRA:CALSNYQLIW
clone_471_aK0	clonotype1336aKO	1	TRB:CASSPGHNNQAPLF;TRA:CAASGQGGRALIF;TRA:CAVSGGQGGRALIF
clone_472_aK0	clonotype1337aKO	1	TRB:CASSLAGTVTEVFF;TRA:CAASYQGGRALIF
clone_473_aK0	clonotype1338aKO	1	TRB:CASSLKGVQNTLYF;TRA:CALNSNNRIFF
clone_474_aK0	clonotype1339aKO	1	TRB:CASSGWPGGDGQDTQYF;TRA:CAVSITGNYKYVF
clone_475_aK0	clonotype133aKO	1	TRB:CGASPGNSDYTF;TRA:CAVSGFWANKMIF
clone_476_aK0	clonotype1340aKO	1	TRB:CASSPTGGWNSPLYF;TRA:CAVRDTNAYKVIF
clone_477_aK0	clonotype1341aKO	1	TRB:CASSAGLANYAEQFF;TRA:CAVSARGNYKPTF
clone_478_aK0	clonotype1343aKO	1	TRB:CASSWLGGRKDTQYF;TRA:CAVATSSGQKLVF
clone_479_aK0	clonotype1344aKO	1	TRB:CSSSQQGSGNTLYF;TRA:CAMRVLTSGGNYKPTF;TRA:CAVSENSGTYQRF
clone_480_aK0	clonotype1345aKO	1	TRB:CTCSAAANSDYTF;TRA:CAALNSGGSNYKLTF
clone_481_aK0	clonotype1346aKO	1	TRB:CASSSGQGANTEVFF;TRA:CALRAGTGGYKVVF
clone_482_aK0	clonotype1347aKO	1	TRB:CAWSLELGNIGDERLFF;TRA:CAARVSGSFNKLTF
clone_483_aK0	clonotype1348aKO	1	TRB:CAWSLGTGGANTGQLYF;TRA:CALGEDRLTL
clone_484_aK0	clonotype134aKO	1	TRB:CGAREGYSDYTF;TRA:CAIDYQGGRALIF
clone_485_aK0	clonotype1350aKO	1	TRB:CASSSDNSGNTLYF;TRA:CAASPNTNKVVF
clone_486_aK0	clonotype1351aKO	1	TRB:CASSSGISGNTLYF;TRA:CVLRPSNYNVLYF
clone_487_aK0	clonotype1352aKO	1	TRB:CASSLGGSQNTLYF;TRB:CASSSSAGAETLYF;TRA:CAVSMDSNYQLIW
clone_488_aK0	clonotype1353aKO	1	TRB:CASSLGLGGDTQYF;TRA:CAVSAYQGGRALIF
clone_489_aK0	clonotype1354aKO	1	TRB:CASSFRGGDERLFF;TRB:CASSQEGQNSYNSPLYF;TRA:CAVGGNYNVLYF
clone_490_aK0	clonotype1355aKO	1	TRB:CASSRGGTGGYEQYF;TRA:CAATSSNMGYKLTF
clone_491_aK0	clonotype1356aKO	1	TRB:CASSPKGVTGQLYF;TRA:CVLSATGNYKYVF
clone_492_aK0	clonotype1357aKO	1	TRB:CASGAWGNYAEQFF;TRB:CASSPDRGNQAPLF;TRA:CATDAGTGGYKVVF
clone_493_aK0	clonotype1358aKO	1	TRB:CASSAGTANTEVFF;TRA:CAASKAGNTGKLIF
clone_494_aK0	clonotype1359aKO	1	TRB:CASSLEGGRDTQYF;TRA:CAMSRTGSGGKLTL
clone_495_aK0	clonotype135aKO	1	TRB:CASSDWGGANTQYF;TRB:CSSTGSSYEQYF;TRA:CALGETTNAYKVIF
clone_496_aK0	clonotype1360aKO	1	TRB:CASSLGGGVYEQYF;TRA:CAVSLTGNTGKLIF
clone_497_aK0	clonotype1361aKO	1	TRB:CASSLPGAGNTLYF;TRA:CAVSGTASLGKLQF
clone_498_aK0	clonotype1363aKO	1	TRB:CASSPGTANTEVFF;TRA:CALTGSGGKLTL
clone_499_aK0	clonotype1365aKO	1	TRB:CASGDRLGGGSYEQYF;TRA:CVLSGSSNNRIFF
clone_500_aK0	clonotype1367aKO	1	TRB:CASSQDWQNNQAPLF;TRA:CVLSVYNQGKLIF
clone_501_aK0	clonotype1368aKO	1	TRB:CASSMGRNTLYF;TRA:CAVSMASSSFSKLVF
clone_502_aK0	clonotype1369aKO	1	TRB:CASSSGGSYNSPLYF;TRA:CVVASSSFSKLVF
clone_503_aK0	clonotype1370aKO	1	TRB:CASSQDRPGSNERLFF;TRA:CAVSNTGNYKYVF
clone_504_aK0	clonotype1371aKO	1	TRB:CASSLNWGAFSYEQYF;TRA:CAASVRGNNKLTF
clone_505_aK0	clonotype1372aKO	1	TRB:CASSNWGNYAEQFF;TRA:CAASRNSNNRIFF
clone_506_aK0	clonotype1373aKO	1	TRB:CASSQGTFQDTQYF;TRA:CAARGYNQGKLIF
clone_507_aK0	clonotype1374aKO	1	TRB:CASSQTGGPETLYF;TRA:CVLSAGTGGYKVVF
clone_508_aK0	clonotype1375aKO	1	TRB:CASSGGTGDAEQFF;TRA:CAVSASTASLGKLQF
clone_509_aK0	clonotype1376aKO	1	TRB:CASSLGDWGVEQFF;TRA:CAVSRGTQVVGQLTF
clone_510_aK0	clonotype1377aKO	1	TRB:CASSRDSGNQDTQYF;TRA:CAASGPNTGKLTF
clone_511_aK0	clonotype1379aKO	1	TRB:CASSPWGADAEQFF;TRA:CAVSAAEGADRLTF
clone_512_aK0	clonotype137aKO	1	TRB:CASGDTGGNYAEQFF;TRB:CASSRQNTEVFF;TRA:CAMRERDNYAQGLTF;TRA:CAVRHMATGGNNKLTF
clone_513_aK0	clonotype1381aKO	1	TRB:CASSDGWGGNQNTLYF;TRA:CAASNYNQGKLIF
clone_514_aK0	clonotype1382aKO	1	TRB:CASGDVWGGSQNTLYF;TRA:CALGASSGSWQLIF
clone_515_aK0	clonotype1383aKO	1	TRB:CASSQDPQGQDTQYF;TRA:CASSNMGYKLTF
clone_516_aK0	clonotype1384aKO	1	TRB:CASSYRTGGGERLFF;TRA:CAASEGNNYAQGLTF
clone_517_aK0	clonotype1385aKO	1	TRB:CASSLDRGRQNTLYF;TRA:CALSDPGNNRIFF
clone_518_aK0	clonotype1386aKO	1	TRB:CTCSAERQNTLYF;TRA:CVLSDASGSWQLIF
clone_519_aK0	clonotype1387aKO	1	TRB:CTCSADPNTEVFF;TRA:CAASEQGYNQGKLIF
clone_520_aK0	clonotype1388aKO	1	TRB:CTCSAGSQNTLYF;TRA:CAVSTASSGSWQLIF
clone_521_aK0	clonotype1389aKO	1	TRB:CASRTGGIDAETLYF;TRA:CALSNTNTGKLTF
clone_522_aK0	clonotype1390aKO	1	TRB:CASSLSGTDNQAPLF;TRA:CALLSSNTNKVVF
clone_523_aK0	clonotype1391aKO	1	TRB:CASSQSPQGGQDTQYF;TRA:CAMEHYNQGKLIF
clone_524_aK0	clonotype1392aKO	1	TRB:CASSQERGTGNERLFF;TRA:CAVRYTEGADRLTF
clone_525_aK0	clonotype1393aKO	1	TRB:CASSQARTGSAETLYF;TRA:CAVRWTLSGSFNKLTF
clone_526_aK0	clonotype1396aKO	1	TRB:CASSRDRQNYAEQFF;TRA:CAVRYNTNTGKLTF
clone_527_aK0	clonotype1397aKO	1	TRB:CASSHRGDTGQLYF;TRA:CALSDRGSWQLIF
clone_528_aK0	clonotype1398aKO	1	TRB:CASSPPPSQNTLYF;TRA:CALSGQGTGSKLSF
clone_529_aK0	clonotype1399aKO	1	TRB:CASSPTGANTEVFF;TRA:CAVEPGTGSNRLTF
clone_530_aK0	clonotype1400aKO	1	TRB:CASSPTGAYAEQFF;TRA:CAAGIDRGSALGRLHF
clone_531_aK0	clonotype1401aKO	1	TRB:CASSSGLGVDTQYF;TRA:CAASSMDSNYQLIW
clone_532_aK0	clonotype1402aKO	1	TRB:CASSLDETNQAPLF;TRA:CALSPGTGGYKVVF
clone_533_aK0	clonotype1403aKO	1	TRB:CASRKTTIQDTQYF;TRA:CALSHRNNYAQGLTF
clone_534_aK0	clonotype1404aKO	1	TRB:CASSPTGEGSPLYF;TRA:CALPGTGGYKVVF
clone_535_aK0	clonotype1405aKO	1	TRB:CASSFGQNYAEQFF;TRA:CALSDPNYAQGLTF
clone_536_aK0	clonotype1407aKO	1	TRB:CTCSADSLYEQYF;TRA:CALTDTNAYKVIF
clone_537_aK0	clonotype1408aKO	1	TRB:CASSSGDGEPSDYTF;TRA:CAMREDSGTYQRF
clone_538_aK0	clonotype1409aKO	1	TRB:CASSLGNLNQDTQYF;TRA:CALSGTSSGQKLVF
clone_539_aK0	clonotype1410aKO	1	TRB:CASSQEDRKNYAEQFF;TRA:CALSRTSSGQKLVF
clone_540_aK0	clonotype1411aKO	1	TRB:CASSFRTGANTGQLYF;TRB:CASSSTGGAETLYF;TRA:CALSDQTNAYKVIF;TRA:CALSDRYSNNRLTL
clone_541_aK0	clonotype1412aKO	1	TRB:CASSLRQGAGQLYF;TRA:CAMDSDTNAYKVIF
clone_542_aK0	clonotype1413aKO	1	TRB:CASSLELGQDTQYF;TRA:CAVRKETGNTGKLIF
clone_543_aK0	clonotype1415aKO	1	TRB:CASSFPGGDYEQYF;TRA:CALGDAGSWQLIF
clone_544_aK0	clonotype1416aKO	1	TRB:CASRSTDSGNTLYF;TRA:CASLSGSFNKLTF
clone_545_aK0	clonotype1417aKO	1	TRB:CASSDTGGLNYAEQFF;TRA:CAMRFDSGYNKLTF
clone_546_aK0	clonotype1420aKO	1	TRB:CASSSGGSYNSPLYF;TRA:CALGRNTNTGKLTF
clone_547_aK0	clonotype1421aKO	1	TRB:CASSLVGGGDTQYF;TRA:CALESSGGSNYKLTF
clone_548_aK0	clonotype1422aKO	1	TRB:CASRDWGGYAEQFF;TRA:CAMREGYNQGKLIF
clone_549_aK0	clonotype1425aKO	1	TRB:CASSLAGAQDTQYF;TRA:CAASITGNTGKLIF;TRA:CALVVPLISNTNKVVF
clone_550_aK0	clonotype1426aKO	1	TRB:CASSLGQGAAEVFF;TRA:CAMRATGFASALTF
clone_551_aK0	clonotype1427aKO	1	TRB:CASSDNRDWGGNAEQFF;TRA:CALSDRASSGSWQLIF
clone_552_aK0	clonotype1428aKO	1	TRB:CASSQGTGGYAEQFF;TRA:CAGAGNTGKLIF
clone_553_aK0	clonotype1429aKO	1	TRB:CASSFLNSGNTLYF;TRA:CAMREGMDSGYNKLTF
clone_554_aK0	clonotype1430aKO	1	TRB:CASSLVWGTYEQYF;TRA:CAASGGGRALIF
clone_555_aK0	clonotype1431aKO	1	TRB:CASSDSDWGGAYAEQFF;TRA:CALHTNAYKVIF
clone_556_aK0	clonotype1432aKO	1	TRB:CASSQPGGAEDTQYF;TRA:CAASARNNRIFF
clone_557_aK0	clonotype1433aKO	1	TRB:CASSFGQGDTEVFF;TRA:CAASGNSGTYQRF
clone_558_aK0	clonotype1434aKO	1	TRB:CASSDNRGQGAETLYF;TRA:CAASVNSNNRIFF
clone_559_aK0	clonotype1435aKO	1	TRB:CASSRQGPNTGQLYF;TRA:CAASGNMGYKLTF
clone_560_aK0	clonotype1436aKO	1	TRB:CASSRLDNSYNSPLYF;TRA:CAASGSSGNKLIF
clone_561_aK0	clonotype1438aKO	1	TRB:CASSLSRDIYEQYF;TRA:CAASATSSGQKLVF
clone_562_aK0	clonotype1439aKO	1	TRB:CASRTGGFSNERLFF;TRA:CAASGNSGTYQRF
clone_563_aK0	clonotype1441aKO	1	TRB:CASSLTRDNSPLYF;TRA:CAARTGNTGKLIF
clone_564_aK0	clonotype1442aKO	1	TRB:CTCSAGSTGQLYF;TRA:CAASFGANTGKLTF
clone_565_aK0	clonotype1443aKO	1	TRB:CASSLDGGGNTLYF;TRA:CAASANYGNEKITF
clone_566_aK0	clonotype1444aKO	1	TRB:CASSLEGGWAEQFF;TRA:CAASDNYGNEKITF
clone_567_aK0	clonotype1445aKO	1	TRB:CASSLKGYTGQLYF;TRB:CTCSADGGYAEQFF;TRA:CAASINTGNYKYVF;TRA:CALSEAGYQNFYF
clone_568_aK0	clonotype1446aKO	1	TRB:CASSWDWGGFYEQYF;TRA:CAASLPGTGSNRLTF
clone_569_aK0	clonotype1447aKO	1	TRB:CTCTRVGNTEVFF;TRA:CAASGSGGSNYKLTF
clone_570_aK0	clonotype1449aKO	1	TRB:CASSLGVSGNTLYF;TRA:CAASANTGANTGKLTF
clone_571_aK0	clonotype1450aKO	1	TRB:CASSNDRGQNTLYF;TRA:CALSELISGSFNKLTF
clone_572_aK0	clonotype1451aKO	1	TRB:CASSLADTYAEQFF;TRA:CALTNYGNEKITF
clone_573_aK0	clonotype1452aKO	1	TRB:CASSLRGQGDTQYF;TRB:CASSSTGGASAETLYF;TRA:CALSANYNQGKLIF
clone_574_aK0	clonotype1453aKO	1	TRB:CASSQSGGGNTEVFF;TRA:CALAPQGTGSKLSF
clone_575_aK0	clonotype1454aKO	1	TRA:CAARGAGSFNKLTF
clone_576_aK0	clonotype1455aKO	1	TRA:CAARGAGSFNKLTF
clone_577_aK0	clonotype1456aKO	1	TRA:CAASEHGGSALGRLHF
clone_578_aK0	clonotype1457aKO	1	TRA:CAASEHGGSALGRLHF
clone_579_aK0	clonotype1458aKO	1	TRA:CAVSIWYGSSGNKLIF
clone_580_aK0	clonotype1459aKO	1	TRB:CASSTRAGNTLYF
clone_581_aK0	clonotype1460aKO	1	TRB:CASSTGQGTEVFF
clone_582_aK0	clonotype1461aKO	1	TRB:CASSIAWGYEQYF
clone_583_aK0	clonotype1462aKO	1	TRB:CASSIGIGSDYTF
clone_584_aK0	clonotype1464aKO	1	TRB:CASSPGHNTEVFF
clone_585_aK0	clonotype1465aKO	1	TRB:CASSGGAGNTLYF
clone_586_aK0	clonotype1466aKO	1	TRB:CASSSGNYAEQFF
clone_587_aK0	clonotype1467aKO	1	TRB:CASSLGHLYEQYF
clone_588_aK0	clonotype1468aKO	1	TRB:CASIHGTGREVFF
clone_589_aK0	clonotype1469aKO	1	TRA:CAVSANNYAQGLTF
clone_590_aK0	clonotype146aKO	1	TRB:CASSQEQGGSDYTF;TRA:CAPGTNAYKVIF
clone_591_aK0	clonotype1470aKO	1	TRB:CASSPSGTGVNSPLYF
clone_592_aK0	clonotype1471aKO	1	TRB:CASSQERGASNTGQLYF
clone_593_aK0	clonotype1472aKO	1	TRB:CASSQDLGGRGQNTLYF
clone_594_aK0	clonotype1473aKO	1	TRB:CASSQDLGGRGQNTLYF
clone_595_aK0	clonotype1474aKO	1	TRA:CAVTPNTGANTGKLTF
clone_596_aK0	clonotype1475aKO	1	TRA:CALRKNNNNAPRF
clone_597_aK0	clonotype1476aKO	1	TRA:CALLTQVVGQLTF
clone_598_aK0	clonotype1477aKO	1	TRA:CALGEAEGADRLTF
clone_599_aK0	clonotype1479aKO	1	TRB:CASSPQTGGALGQYF
clone_600_aK0	clonotype147aKO	1	TRB:CASGDHWGSAETLYF;TRB:CASSQDQGGTEVFF;TRA:CAASANTGYQNFYF
clone_601_aK0	clonotype1480aKO	1	TRB:CASSPGQGRNTEVFF
clone_602_aK0	clonotype1481aKO	1	TRB:CASSPGGAGQNTLYF
clone_603_aK0	clonotype1482aKO	1	TRB:CASSEDWGGAGTQYF
clone_604_aK0	clonotype1483aKO	1	TRB:CASSGTGGSAETLYF
clone_605_aK0	clonotype1484aKO	1	TRB:CASSSGLGGLYEQYF
clone_606_aK0	clonotype1485aKO	1	TRB:CASSLLGGAAETLYF
clone_607_aK0	clonotype1486aKO	1	TRB:CASSLELGGLAEQFF
clone_608_aK0	clonotype1488aKO	1	TRB:CASSLGTGSGNTLYF
clone_609_aK0	clonotype1489aKO	1	TRB:CASSLVQGNYAEQFF
clone_610_aK0	clonotype148aKO	1	TRB:CASSRLNQDTQYF;TRA:CAIRGGYQNFYF
clone_611_aK0	clonotype1490aKO	1	TRB:CASSLSGENYAEQFF
clone_612_aK0	clonotype1491aKO	1	TRB:CASSLWGGAQNTLYF
clone_613_aK0	clonotype1492aKO	1	TRB:CASSFLDNSGNTLYF
clone_614_aK0	clonotype1493aKO	1	TRB:CASSFGGGRAETLYF
clone_615_aK0	clonotype1495aKO	1	TRB:CASSLGQGAGNTLYF
clone_616_aK0	clonotype1496aKO	1	TRB:CASSFNWGNYAEQFF
clone_617_aK0	clonotype1497aKO	1	TRB:CASSFAGAGTGQLYF
clone_618_aK0	clonotype1498aKO	1	TRB:CASSFAGAGTGQLYF
clone_619_aK0	clonotype1499aKO	1	TRB:CASSRGGGISGNTLYF
clone_620_aK0	clonotype1500aKO	1	TRB:CASSPDWGSSYEQYF
clone_621_aK0	clonotype1501aKO	1	TRB:CASSSGQGGQNTLYF
clone_622_aK0	clonotype1502aKO	1	TRB:CASSLEGGGGDTQYF
clone_623_aK0	clonotype1503aKO	1	TRB:CASSLDWGQNQAPLF
clone_624_aK0	clonotype1504aKO	1	TRB:CASSLDWGQNQAPLF
clone_625_aK0	clonotype1505aKO	1	TRB:CASSLAGGRDTEVFF
clone_626_aK0	clonotype1506aKO	1	TRB:CASSLAGGRDTEVFF
clone_627_aK0	clonotype1507aKO	1	TRB:CASSLVGGRAETLYF
clone_628_aK0	clonotype1508aKO	1	TRB:CASSLSGGNYAEQFF
clone_629_aK0	clonotype1509aKO	1	TRB:CASSFTGTGEWTLYF
clone_630_aK0	clonotype150aKO	1	TRB:CASSFSGDEQYF;TRA:CAVRAANTGKLTF
clone_631_aK0	clonotype1510aKO	1	TRB:CASSFTGTGEWTLYF
clone_632_aK0	clonotype1511aKO	1	TRB:CASSFTGTGEWTLYF
clone_633_aK0	clonotype1512aKO	1	TRB:CASSFGTASQNTLYF
clone_634_aK0	clonotype1513aKO	1	TRB:CASSLEGGGSYEQYF
clone_635_aK0	clonotype1514aKO	1	TRB:CASSLYQGSNSDYTF
clone_636_aK0	clonotype1515aKO	1	TRB:CASSRDWGPSYEQYF
clone_637_aK0	clonotype1517aKO	1	TRB:CASSRTGGYNSPLYF
clone_638_aK0	clonotype1518aKO	1	TRB:CASSFLRGDQDTQYF
clone_639_aK0	clonotype1519aKO	1	TRB:CASSFGTDSNERLFF
clone_640_aK0	clonotype1520aKO	1	TRB:CASSFSGTGNERLFF
clone_641_aK0	clonotype1521aKO	1	TRB:CASSFSGTGNERLFF
clone_642_aK0	clonotype1522aKO	1	TRB:CASSFFGGGYAEQFF
clone_643_aK0	clonotype1523aKO	1	TRB:CASSLGGTGYAEQFF
clone_644_aK0	clonotype1524aKO	1	TRB:CASSPAGTSQNTLYF
clone_645_aK0	clonotype1525aKO	1	TRB:CASSLDRNSQNTLYF
clone_646_aK0	clonotype1526aKO	1	TRB:CASSLDRLNYAEQFF
clone_647_aK0	clonotype1527aKO	1	TRB:CASSLAPGLGVEQYF
clone_648_aK0	clonotype1528aKO	1	TRB:CASSLGGSSQNTLYF
clone_649_aK0	clonotype1529aKO	1	TRB:CASGDARTGGAHAEQFF
clone_650_aK0	clonotype152aKO	1	TRB:CASRDISYNSPLYF;TRA:CAVRNYGSSGNKLIF
clone_651_aK0	clonotype1530aKO	1	TRB:CASSQTGAGGQNTLYF
clone_652_aK0	clonotype1531aKO	1	TRB:CASSQDGGHSAETLYF
clone_653_aK0	clonotype1532aKO	1	TRB:CSSSQSVTANTEVFF
clone_654_aK0	clonotype1534aKO	1	TRB:CTCRPTGHTGQLYF
clone_655_aK0	clonotype1535aKO	1	TRB:CTCSDRGTNERLFF
clone_656_aK0	clonotype1537aKO	1	TRB:CTCSARGGAAEQFF
clone_657_aK0	clonotype1539aKO	1	TRB:CTCSADKSNTEVFF
clone_658_aK0	clonotype1540aKO	1	TRB:CTCSADRANTEVFF
clone_659_aK0	clonotype1541aKO	1	TRB:CTCSADGYNQAPLF
clone_660_aK0	clonotype1542aKO	1	TRB:CTCSADQRGERLFF
clone_661_aK0	clonotype1543aKO	1	TRB:CTCSADLGGYEQYF
clone_662_aK0	clonotype1544aKO	1	TRB:CTCSADVRGQAPLF
clone_663_aK0	clonotype1545aKO	1	TRB:CTCSADLYNQAPLF
clone_664_aK0	clonotype1546aKO	1	TRB:CTCSAAGGNYEQYF
clone_665_aK0	clonotype1547aKO	1	TRB:CTCSAGQGAYEQYF
clone_666_aK0	clonotype1548aKO	1	TRB:CTCSAGDISYEQYF
clone_667_aK0	clonotype1549aKO	1	TRB:CTCSAVTGGREQYF
clone_668_aK0	clonotype154aKO	1	TRB:CASGEGWGAAEQFF;TRA:CALGSSGSWQLIF
clone_669_aK0	clonotype1550aKO	1	TRB:CTCSAVTGGREQYF
clone_670_aK0	clonotype1551aKO	1	TRB:CTCSARQGKNTLYF
clone_671_aK0	clonotype1552aKO	1	TRB:CTCSARTGGYEQYF
clone_672_aK0	clonotype1553aKO	1	TRB:CTCSAGTNNQAPLF
clone_673_aK0	clonotype1554aKO	1	TRB:CTCSAGQSSYEQYF
clone_674_aK0	clonotype1555aKO	1	TRB:CTCSGTTNTGQLYF
clone_675_aK0	clonotype1557aKO	1	TRB:CTCSGDRNYAEQFF
clone_676_aK0	clonotype1558aKO	1	TRB:CTCSGGQKNTEVFF
clone_677_aK0	clonotype1559aKO	1	TRB:CTCSVGGRYAEQFF
clone_678_aK0	clonotype1560aKO	1	TRB:CTCSVGGRYAEQFF
clone_679_aK0	clonotype1561aKO	1	TRB:CTCSSGQNYAEQFF
clone_680_aK0	clonotype1562aKO	1	TRB:CASSPGTGGQDTQYF;TRA:CILRDYANKMIF
clone_681_aK0	clonotype1564aKO	1	TRB:CTCSRTGDTGQLYF;TRA:CILITNTGKLTF
clone_682_aK0	clonotype1565aKO	1	TRB:CASSRDWGDAETLYF;TRA:CATVSSNTNKVVF
clone_683_aK0	clonotype1567aKO	1	TRB:CTCSGTGGAETLYF;TRA:CAPPDYSNNRLTL;TRA:CAVSSGTGGYKVVF
clone_684_aK0	clonotype1569aKO	1	TRB:CASSLEGISNERLFF;TRA:CAASNYGNEKITF
clone_685_aK0	clonotype1570aKO	1	TRB:CASSLRDRGFSDYTF;TRA:CAIVRTGGYKVVF
clone_686_aK0	clonotype1572aKO	1	TRB:CASSSVGGGAGEQYF;TRA:CILRVAQGGSAKLIF
clone_687_aK0	clonotype1573aKO	1	TRB:CASSLAQGGNTEVFF;TRA:CATDARGNTGKLIF
clone_688_aK0	clonotype1574aKO	1	TRB:CASGDGLGGNYAEQFF;TRB:CASSLGDRTYAEQFF;TRA:CAASTSSGQKLVF
clone_689_aK0	clonotype1575aKO	1	TRB:CASSFLGGSYAEQFF;TRA:CAAETRGNYKPTF
clone_690_aK0	clonotype1576aKO	1	TRB:CTCSARSANTEVFF;TRA:CAAHRNSNNRIFF
clone_691_aK0	clonotype1577aKO	1	TRB:CTCSGRDSNQAPLF;TRA:CASFSGGNYKPTF
clone_692_aK0	clonotype1578aKO	1	TRB:CASTRTTNSDYTF;TRB:CTCSDQTVSNERLFF;TRA:CAAEEGSALGRLHF;TRA:CALIGQGGRALIF
clone_693_aK0	clonotype1579aKO	1	TRB:CASSAGVYAEQFF;TRB:CTCSAEGQDSNERLFF;TRA:CAARTNTGKLTF
clone_694_aK0	clonotype1580aKO	1	TRB:CASSFDSNERLFF;TRA:CAANTNTGKLTF
clone_695_aK0	clonotype1581aKO	1	TRB:CASSHDRGLNERLFF;TRA:CAIVRGSALGRLHF
clone_696_aK0	clonotype1582aKO	1	TRB:CASSPRDRAPERLFF;TRA:CALAGAGNTGKLIF
clone_697_aK0	clonotype1583aKO	1	TRB:CASSSRLGGRDTQYF;TRA:CAVNYSNNRLTL
clone_698_aK0	clonotype1584aKO	1	TRB:CASSPPLGGPNTLYF;TRA:CALERNTGYQNFYF
clone_699_aK0	clonotype1585aKO	1	TRB:CASSLRKGTSERLFF;TRA:CAASPNTGKLTF
clone_700_aK0	clonotype1586aKO	1	TRB:CASSLDGDWGYEQYF;TRA:CAVSNNNNAPRF
clone_701_aK0	clonotype1587aKO	1	TRB:CASSLESGDNSPLYF;TRA:CAAPLAGNTGKLIF
clone_702_aK0	clonotype1589aKO	1	TRB:CTCSAWGPSAEQFF;TRA:CAMERSTGYQNFYF
clone_703_aK0	clonotype158aKO	1	TRB:CASSQDGRANTEVFF;TRA:CALGGGNNRIFF
clone_704_aK0	clonotype1590aKO	1	TRB:CASIRENYAEQFF;TRA:CAVMSSGSWQLIF
clone_705_aK0	clonotype1591aKO	1	TRB:CASSQEGTGGAQDTQYF;TRA:CVLGDTGGYKVVF
clone_706_aK0	clonotype1594aKO	1	TRB:CASSLGWGSAETLYF;TRA:CAAEVGGGSNAKLTF
clone_707_aK0	clonotype1595aKO	1	TRB:CASSLGGVNYAEQFF;TRA:CALSGYSNNRLTL
clone_708_aK0	clonotype1596aKO	1	TRB:CTCSAKSSAETLYF;TRA:CAATYANKMIF
clone_709_aK0	clonotype1597aKO	1	TRB:CASSMGENTEVFF;TRA:CAARNTGSGGKLTL
clone_710_aK0	clonotype1598aKO	1	TRB:CASSMGGSYEQYF;TRA:CALSDDMGYKLTF;TRA:CAVLTSGGNYKPTF
clone_711_aK0	clonotype1599aKO	1	TRB:CASSPRTEGQNTLYF;TRA:CALSDRPGYNKLTF
clone_712_aK0	clonotype1600aKO	1	TRB:CASSRQGASQNTLYF;TRA:CAASRVNYAQGLTF
clone_713_aK0	clonotype1601aKO	1	TRB:CASSLALGGLYEQYF;TRA:CAARNYAQGLTF
clone_714_aK0	clonotype1604aKO	1	TRB:CASSLGTGRNTEVFF;TRA:CATDAGNMGYKLTF
clone_715_aK0	clonotype1605aKO	1	TRB:CASSWDWGNYAEQFF;TRA:CVLGDHSAGNKLTF
clone_716_aK0	clonotype1606aKO	1	TRB:CASSLRQGGAETLYF;TRA:CALGDEGRALIF
clone_717_aK0	clonotype1607aKO	1	TRB:CASRTGGANTGQLYF;TRA:CAASMCAQGLTF
clone_718_aK0	clonotype1609aKO	1	TRB:CASSPRDWGVNQDTQYF;TRA:CAASYSNYQLIW
clone_719_aK0	clonotype1610aKO	1	TRB:CSSSQSAQYNSPLYF;TRA:CAVRSSNNRIFF
clone_720_aK0	clonotype1611aKO	1	TRB:CTCSAVSYNSPLYF;TRA:CAVPDYSNNRLTL;TRA:CAVSMNQGGRALIF
clone_721_aK0	clonotype1612aKO	1	TRB:CTCSAQGGNERLFF;TRA:CAASASSGSWQLIF
clone_722_aK0	clonotype1613aKO	1	TRB:CASNRGWQNTLYF;TRA:CAVSSGGSNYKLTF
clone_723_aK0	clonotype1614aKO	1	TRB:CASSPGTGGRGTEVFF;TRA:CAVSDNSGTYQRF
clone_724_aK0	clonotype1615aKO	1	TRB:CASSQDFGTFSNERLFF;TRA:CALFRGGRALIF
clone_725_aK0	clonotype1616aKO	1	TRB:CASSLGQGGNERLFF;TRA:CATDNGNYNQGKLIF
clone_726_aK0	clonotype1617aKO	1	TRB:CASSWGGSNTGQLYF;TRA:CALSPNSGTYQRF
clone_727_aK0	clonotype1618aKO	1	TRB:CASSPSGTLNSDYTF;TRA:CAVSASNTNKVVF
clone_728_aK0	clonotype1620aKO	1	TRB:CASSPRDNSGNTLYF;TRA:CAASDTGSSGNKLIF;TRA:CALASSNTNKVVF
clone_729_aK0	clonotype1621aKO	1	TRB:CASSLSGQSNERLFF;TRA:CAVSRYSNNRLTL
clone_730_aK0	clonotype1622aKO	1	TRB:CASSLSWGGYAEQFF;TRA:CAATRNNNNAPRF;TRA:CALGPNTNTGKLTF
clone_731_aK0	clonotype1623aKO	1	TRB:CASSSTGGAREETLYF;TRA:CALSDQDNMGYKLTF
clone_732_aK0	clonotype1624aKO	1	TRB:CTCSADLSNSDYTF;TRA:CSASKNSGTYQRF
clone_733_aK0	clonotype1626aKO	1	TRB:CTCSAQFSNERLFF;TRA:CAASGGSNYQLIW
clone_734_aK0	clonotype1627aKO	1	TRB:CASSIWGPYEQYF;TRA:CAASETVSSGSWQLIF
clone_735_aK0	clonotype1628aKO	1	TRB:CASSRDSQNTLYF;TRA:CATKRANVGDNSKLIW
clone_736_aK0	clonotype1629aKO	1	TRB:CASSWDRGPGNTLYF;TRA:CAASGNYNQGKLIF
clone_737_aK0	clonotype1630aKO	1	TRB:CASSLRQTSQNTLYF;TRA:CALSEDQGGRALIF
clone_738_aK0	clonotype1631aKO	1	TRB:CASSLPDRAGNTLYF;TRA:CALGNYNQGKLIF
clone_739_aK0	clonotype1632aKO	1	TRB:CASRAGDNTGQLYF;TRB:CASTPTGGAQDTQYF;TRA:CALSDYYAQGLTF
clone_740_aK0	clonotype1633aKO	1	TRB:CASSLSQGAAETLYF;TRA:CAASGNNYAQGLTF
clone_741_aK0	clonotype1634aKO	1	TRB:CASSRTGGYNSPLYF;TRA:CAMRDTNAYKVIF
clone_742_aK0	clonotype1635aKO	1	TRB:CASSTGTGGAYSDYTF;TRA:CAVRFPNYGNEKITF
clone_743_aK0	clonotype1636aKO	1	TRB:CTCSARGGAAEQFF;TRA:CALSIWDSAGNKLTF
clone_744_aK0	clonotype1637aKO	1	TRB:CTCSADKRNTEVFF;TRA:CAMREDSNYQLIW
clone_745_aK0	clonotype1638aKO	1	TRB:CASSLNDRGQAEQFF;TRA:CALSDNYNQGKLIF
clone_746_aK0	clonotype1639aKO	1	TRB:CASSLEGGGQNTLYF;TRA:CAVSAAWNSNNRIFF
clone_747_aK0	clonotype1640aKO	1	TRB:CASSLGLGSSYEQYF;TRA:CALSVPGSGGKLTL
clone_748_aK0	clonotype1641aKO	1	TRB:CASSLGRRSQNTLYF;TRA:CAVSARGSALGRLHF
clone_749_aK0	clonotype1642aKO	1	TRB:CASSRTGGYNSPLYF;TRA:CAMRDTNAYKVIF
clone_750_aK0	clonotype1643aKO	1	TRB:CASSFSGTGGDTQYF;TRA:CALSDNYNQGKLIF
clone_751_aK0	clonotype1644aKO	1	TRB:CASSTDWPSQNTLYF;TRA:CALRITGNTGKLIF
clone_752_aK0	clonotype1647aKO	1	TRB:CASSPWGSNYAEQFF;TRA:CALGDRATGGNNKLTF
clone_753_aK0	clonotype1648aKO	1	TRB:CASSLNLGGYAEQFF;TRA:CALGDLSTQVVGQLTF
clone_754_aK0	clonotype1649aKO	1	TRB:CASSLAGGAPETLYF;TRA:CAMREGYNQGKLIF
clone_755_aK0	clonotype1650aKO	1	TRB:CASSLELGEGSEQYF;TRA:CALGENTGGLSGKLTF
clone_756_aK0	clonotype1651aKO	1	TRB:CASSLGDWGGNTLYF;TRA:CAMRGDNTNTGKLTF
clone_757_aK0	clonotype1652aKO	1	TRB:CASSLLTGGPYEQYF;TRA:CAMREGPGGNYKPTF
clone_758_aK0	clonotype1654aKO	1	TRB:CASSQELGASQNTLYF;TRA:CAMRAVNTGNYKYVF
clone_759_aK0	clonotype1657aKO	1	TRB:CASSPDRANTGQLYF;TRA:CAASAANTNKVVF
clone_760_aK0	clonotype1659aKO	1	TRB:CTCSAEAGYAEQFF;TRA:CAASEGNYAQGLTF
clone_761_aK0	clonotype1660aKO	1	TRB:CASSSDWGNQDTQYF;TRA:CALCRDYANKMIF
clone_762_aK0	clonotype1661aKO	1	TRB:CASSLLGYNYAEQFF;TRA:CALSHTGYQNFYF
clone_763_aK0	clonotype1662aKO	1	TRB:CASSQDGTANNQAPLF;TRA:CALSNYNQGKLIF
clone_764_aK0	clonotype1663aKO	1	TRB:CASSIGNQNTLYF;TRA:CALSDPGANTGKLTF
clone_765_aK0	clonotype1665aKO	1	TRB:CASSIGASGNTLYF
clone_766_aK0	clonotype1666aKO	1	TRB:CASSITASQNTLYF
clone_767_aK0	clonotype1667aKO	1	TRB:CASSIQGANSDYTF
clone_768_aK0	clonotype1668aKO	1	TRB:CASSIGTDYAEQFF
clone_769_aK0	clonotype1669aKO	1	TRB:CASSMRTSNERLFF
clone_770_aK0	clonotype166aKO	1	TRB:CASSLDTGDEQYF;TRA:CAASDTNAYKVIF;TRA:CAIDRGSALGRLHF
clone_771_aK0	clonotype1670aKO	1	TRB:CASSMVGGTYEQYF
clone_772_aK0	clonotype1671aKO	1	TRB:CASSIGSYNSPLYF
clone_773_aK0	clonotype1672aKO	1	TRB:CASSPDSSGNTLYF
clone_774_aK0	clonotype1674aKO	1	TRA:CALSDRGGNTGKLIF
clone_775_aK0	clonotype1675aKO	1	TRA:CSATLASSGSWQLIF
clone_776_aK0	clonotype1676aKO	1	TRA:CALVPRNNNNAPRF
clone_777_aK0	clonotype1677aKO	1	TRB:CASSSRLGGNSYEQYF
clone_778_aK0	clonotype1678aKO	1	TRB:CASSLIGESNTGQLYF
clone_779_aK0	clonotype1679aKO	1	TRB:CASSLDGWGSAETLYF
clone_780_aK0	clonotype1680aKO	1	TRB:CASSLEGGANTGQLYF
clone_781_aK0	clonotype1681aKO	1	TRB:CASSLVLGVSAETLYF
clone_782_aK0	clonotype1682aKO	1	TRB:CASSLVSWGNTGQLYF
clone_783_aK0	clonotype1683aKO	1	TRB:CASSPGTEISNERLFF
clone_784_aK0	clonotype1684aKO	1	TRB:CASSGDWGGSAETLYF
clone_785_aK0	clonotype1685aKO	1	TRB:CASSLDKGGRDAEQFF
clone_786_aK0	clonotype1686aKO	1	TRB:CASSLDPRGSGNTLYF
clone_787_aK0	clonotype1687aKO	1	TRB:CASSLDGTVNTGQLYF
clone_788_aK0	clonotype1688aKO	1	TRB:CASSLDGGPSAETLYF
clone_789_aK0	clonotype1689aKO	1	TRB:CASSLGRGPGYAEQFF
clone_790_aK0	clonotype1690aKO	1	TRB:CASSFPGQGTGNTLYF
clone_791_aK0	clonotype1692aKO	1	TRB:CASSPGGGPNYAEQFF
clone_792_aK0	clonotype1693aKO	1	TRB:CASSFRSPLSGNTLYF
clone_793_aK0	clonotype1695aKO	1	TRA:CALGDYSNNRLTL
clone_794_aK0	clonotype1696aKO	1	TRA:CALGDYSNNRLTL
clone_795_aK0	clonotype1697aKO	1	TRA:CALGDYSNNRLTL
clone_796_aK0	clonotype1698aKO	1	TRB:CTCRDWGGNTGQLYF
clone_797_aK0	clonotype1699aKO	1	TRB:CTCSPDRVNNQAPLF
clone_798_aK0	clonotype1700aKO	1	TRB:CTCSARRQTNTEVFF
clone_799_aK0	clonotype1701aKO	1	TRB:CTCSAELGGENTLYF
clone_800_aK0	clonotype1702aKO	1	TRB:CTCSAEGGYNSPLYF
clone_801_aK0	clonotype1703aKO	1	TRB:CTCSADQGAYAEQFF
clone_802_aK0	clonotype1705aKO	1	TRB:CTCSAADSYNSPLYF
clone_803_aK0	clonotype1706aKO	1	TRB:CTCSAGTGGNQAPLF
clone_804_aK0	clonotype1707aKO	1	TRB:CTCSAGGISNERLFF
clone_805_aK0	clonotype1708aKO	1	TRB:CTCSAVRDGAETLYF
clone_806_aK0	clonotype1709aKO	1	TRB:CTCSATGTLNQAPLF
clone_807_aK0	clonotype1710aKO	1	TRB:CTCSARTSNTGQLYF
clone_808_aK0	clonotype1711aKO	1	TRB:CTCSAGTSSAETLYF
clone_809_aK0	clonotype1712aKO	1	TRB:CTCSAGGRSAETLYF
clone_810_aK0	clonotype1713aKO	1	TRB:CTCSGTGGTNERLFF
clone_811_aK0	clonotype1715aKO	1	TRB:CASSLWGQGSNSDYTF;TRA:CATDDSGSWQLIF
clone_812_aK0	clonotype1716aKO	1	TRB:CASSPPGRTYEQYF;TRA:CALGDSGGNYKPTF;TRA:CVANSGTYQRF
clone_813_aK0	clonotype1718aKO	1	TRB:CTCSAVGGAGNTLYF;TRA:CAIDRGNNNAPRF
clone_814_aK0	clonotype1719aKO	1	TRB:CASSIAAGDYEQYF;TRA:CAGNYNQGKLIF
clone_815_aK0	clonotype1720aKO	1	TRB:CASSSDRGSETLYF;TRA:CAVRSGSWQLIF
clone_816_aK0	clonotype1721aKO	1	TRB:CASSSGHRAETLYF;TRA:CAASGLGYKLTF
clone_817_aK0	clonotype1722aKO	1	TRB:CASSLEGGGGAETLYF;TRA:CAMNYNQGKLIF
clone_818_aK0	clonotype1723aKO	1	TRB:CASSPGTGGNYAEQFF;TRA:CAAEADTNAYKVIF
clone_819_aK0	clonotype1725aKO	1	TRB:CASSIVGGQDTQYF;TRA:CVLSAGSAKLIF
clone_820_aK0	clonotype1726aKO	1	TRB:CASSPGLGTSAETLYF;TRA:CATDDGGNNRIFF
clone_821_aK0	clonotype1728aKO	1	TRB:CASSRDWGGDYAEQFF;TRA:CATDGSAGNKLTF
clone_822_aK0	clonotype1730aKO	1	TRB:CASSMGANTGQLYF;TRA:CAVSWTGNYKYVF
clone_823_aK0	clonotype1731aKO	1	TRB:CASSIQGAGERLFF;TRA:CAVTYNNNNAPRF
clone_824_aK0	clonotype1732aKO	1	TRB:CASRRDWGGENTLYF;TRB:CASSIVQNQDTQYF;TRA:CSATSSGQKLVF
clone_825_aK0	clonotype1733aKO	1	TRB:CASSMEGDTGQLYF;TRA:CAVSAHTNTGKLTF
clone_826_aK0	clonotype1734aKO	1	TRB:CASSLGLGSSAETLYF;TRA:CAASGGNAKLTF;TRA:CALSDLKGSSGNKLIF
clone_827_aK0	clonotype1735aKO	1	TRB:CASSFRDWGPSAETLYF;TRA:CALRPDYSNNRLTL
clone_828_aK0	clonotype1736aKO	1	TRB:CTCSATGGWGTEVFF;TRA:CAVSRSNNRIFF
clone_829_aK0	clonotype1739aKO	1	TRB:CASSHGTGGAGNTLYF;TRA:CVLSGYQGGRALIF
clone_830_aK0	clonotype173aKO	1	TRB:CASSLQTSGNTLYF;TRA:CAMRGNTGANTGKLTF
clone_831_aK0	clonotype1740aKO	1	TRB:CASSLGTGGAQNTLYF;TRA:CALSENTGNYKYVF;TRA:CAVTNNAGAKLTF
clone_832_aK0	clonotype1741aKO	1	TRB:CTCSVGQGANERLFF;TRA:CAARNTGYQNFYF
clone_833_aK0	clonotype1743aKO	1	TRB:CASSMGRANTEVFF;TRA:CALGAGGSNAKLTF
clone_834_aK0	clonotype1744aKO	1	TRB:CASSPWKEHSGNTLYF;TRA:CAVRSRHNTNTGKLTF
clone_835_aK0	clonotype1745aKO	1	TRB:CTCSAERGNQDTQYF;TRA:CALSDYSNNRLTL
clone_836_aK0	clonotype1746aKO	1	TRB:CASSLGRVNSGNTLYF;TRA:CALRLTGNTGKLIF
clone_837_aK0	clonotype1747aKO	1	TRB:CASSSDWGGGQDTQYF;TRA:CALGSSGSWQLIF
clone_838_aK0	clonotype1748aKO	1	TRB:CASSIGLVQNTLYF;TRA:CALSAAMNYNQGKLIF
clone_839_aK0	clonotype1749aKO	1	TRB:CASSRGLSQNTLYF;TRA:CAMRAFITGNTGKLIF
clone_840_aK0	clonotype1750aKO	1	TRB:CASSMTGGAETLYF;TRA:CAAEGTGNYKYVF
clone_841_aK0	clonotype1751aKO	1	TRB:CASSLSLGEVAETLYF;TRA:CAAVEGSFNKLTF
clone_842_aK0	clonotype1752aKO	1	TRB:CTCSAPGGSNERLFF;TRA:CAASKPGTGSNRLTF
clone_843_aK0	clonotype1753aKO	1	TRB:CASSMDRNTGQLYF;TRA:CALSLSNNRIFF
clone_844_aK0	clonotype1754aKO	1	TRB:CASSYGLGGLNYAEQFF;TRA:CALWEPLNTGYQNFYF
clone_845_aK0	clonotype1755aKO	1	TRB:CASSAGQGLYEQYF;TRA:CALSDHTEGADRLTF
clone_846_aK0	clonotype1756aKO	1	TRB:CTCSAGTANTGQLYF;TRA:CALSDVTEGADRLTF
clone_847_aK0	clonotype1757aKO	1	TRB:CASTPSTVSGNTLYF
clone_848_aK0	clonotype1758aKO	1	TRB:CASRYRGNSNERLFF
clone_849_aK0	clonotype1759aKO	1	TRB:CASSIAGGSSYEQYF
clone_850_aK0	clonotype175aKO	1	TRB:CASSLGQGEVAPLF;TRA:CALTLDTNAYKVIF
clone_851_aK0	clonotype1760aKO	1	TRB:CASSATGGNTGQLYF
clone_852_aK0	clonotype1761aKO	1	TRB:CASSLGGGPAETLYF
clone_853_aK0	clonotype1762aKO	1	TRA:CALSDRGNYAQGLTF
clone_854_aK0	clonotype1763aKO	1	TRA:CALSDRSSGSWQLIF
clone_855_aK0	clonotype1764aKO	1	TRA:CALSAPNSAGNKLTF
clone_856_aK0	clonotype1765aKO	1	TRA:CAMRGTNYGNEKITF
clone_857_aK0	clonotype1766aKO	1	TRA:CAMRGTSSGQKLVF
clone_858_aK0	clonotype1767aKO	1	TRA:CAMRDLSNTNKVVF
clone_859_aK0	clonotype1768aKO	1	TRB:CASSRDRGNYNNQAPLF
clone_860_aK0	clonotype1769aKO	1	TRB:CASSSGTGGGSQNTLYF
clone_861_aK0	clonotype1770aKO	1	TRB:CASSPPGLGGTYAEQFF
clone_862_aK0	clonotype1771aKO	1	TRB:CASGERGREQYF
clone_863_aK0	clonotype1773aKO	1	TRB:CASSQDWGGRGIYAEQFF
clone_864_aK0	clonotype1774aKO	1	TRA:CALGRNTNTGKLTF
clone_865_aK0	clonotype1775aKO	1	TRA:CALGRNTNTGKLTF
clone_866_aK0	clonotype1776aKO	1	TRA:CALGDSSGSWQLIF
clone_867_aK0	clonotype1777aKO	1	TRA:CALGVGSSGNKLIF
clone_868_aK0	clonotype1778aKO	1	TRB:CTCSAEDFISNERLFF
clone_869_aK0	clonotype1779aKO	1	TRB:CTCSAEDRVYNSPLYF
clone_870_aK0	clonotype177aKO	1	TRB:CASSQTGRAGNTLYF;TRA:CAAEFMSNYNVLYF
clone_871_aK0	clonotype1780aKO	1	TRB:CTCSADRIISNERLFF
clone_872_aK0	clonotype1781aKO	1	TRB:CTCSADGTANTGQLYF
clone_873_aK0	clonotype1782aKO	1	TRB:CTCSADSRGRDTEVFF
clone_874_aK0	clonotype1783aKO	1	TRB:CTCSADWGQGAVTLYF
clone_875_aK0	clonotype1784aKO	1	TRB:CTCSAAGGMNQDTQYF
clone_876_aK0	clonotype1785aKO	1	TRB:CTCSAGPGQGAETLYF
clone_877_aK0	clonotype1786aKO	1	TRB:CTCSVRDRGSNERLFF
clone_878_aK0	clonotype1787aKO	1	TRB:CASSIAGGSAETLYF;TRA:CAVDMGYKLTF
clone_879_aK0	clonotype1788aKO	1	TRB:CASSFPDWEGSAETLYF;TRA:CAMEGNMGYKLTF
clone_880_aK0	clonotype1789aKO	1	TRB:CASSRWTGANERLFF;TRA:CATANNNNAPRF
clone_881_aK0	clonotype1790aKO	1	TRB:CASSIRGANTGQLYF;TRA:CAMPPNYGNEKITF
clone_882_aK0	clonotype1791aKO	1	TRB:CASSLTGGAREQYF;TRB:CTCSPGLGVNQDTQYF;TRA:CAVSSNTNKVVF
clone_883_aK0	clonotype1792aKO	1	TRB:CASSIEGQSQNTLYF;TRA:CAASEPSGSWQLIF
clone_884_aK0	clonotype1794aKO	1	TRB:CTCSADLGLGSYEQYF;TRA:CAVTPNSNNRIFF
clone_885_aK0	clonotype1795aKO	1	TRB:CTCSADLGGSSYEQYF;TRA:CAVMTTASLGKLQF
clone_886_aK0	clonotype1797aKO	1	TRB:CTCSAAGLGGGDTQYF;TRA:CAVNPGANTGKLTF
clone_887_aK0	clonotype1798aKO	1	TRB:CTCSALDREDNERLFF;TRA:CAVSPDGSNNRLTL
clone_888_aK0	clonotype1799aKO	1	TRB:CTCSSSLTGIYAEQFF;TRA:CAVSGYGSSGNKLIF
clone_889_aK0	clonotype179aKO	1	TRB:CASSLEGGRNTLYF;TRA:CALSDGSGGNYKPTF
clone_890_aK0	clonotype1801aKO	1	TRB:CASSPPGHSQNTLYF;TRA:CAAGYAQGLTF
clone_891_aK0	clonotype1802aKO	1	TRB:CASSIGQGSGNTLYF;TRA:CALGGPTSGGNYKPTF
clone_892_aK0	clonotype1803aKO	1	TRB:CASGAAGTNTEVFF;TRB:CASSQDWGGRGIYAEQFF;TRA:CAASPNAYKVIF
clone_893_aK0	clonotype1804aKO	1	TRB:CASSPDIFSNERLFF;TRA:CALSDWSNNRIFF
clone_894_aK0	clonotype1805aKO	1	TRB:CASTPGGPANTGQLYF
clone_895_aK0	clonotype1806aKO	1	TRB:CASSIRQRAGQNTLYF
clone_896_aK0	clonotype1807aKO	1	TRB:CASSIGGGRGAETLYF
clone_897_aK0	clonotype1808aKO	1	TRB:CASSIWDTSYNSPLYF
clone_898_aK0	clonotype1809aKO	1	TRB:CASSIGTGGALAEQFF
clone_899_aK0	clonotype1811aKO	1	TRB:CASGVRGQNTLYF
clone_900_aK0	clonotype1812aKO	1	TRB:CTCSADRGAHDNQAPLF
clone_901_aK0	clonotype1813aKO	1	TRB:CASSIEAGGAADTQYF;TRA:CATDGGSGGKLTL
clone_902_aK0	clonotype1814aKO	1	TRB:CASSIEDRGGAETLYF;TRA:CAGGTNTGKLTF
clone_903_aK0	clonotype1815aKO	1	TRB:CASSIDGQGSQNTLYF;TRA:CAVRNNYAQGLTF
clone_904_aK0	clonotype1816aKO	1	TRB:CASSIGGGRGAETLYF;TRA:CAARVSAGNKLTF
clone_905_aK0	clonotype1817aKO	1	TRB:CASSFPGLGGSNYAEQFF;TRA:CAAANTGYQNFYF
clone_906_aK0	clonotype1818aKO	1	TRB:CASGYEQYF;TRA:CALGDPYQGGRALIF;TRA:CALGHLGYKLTF
clone_907_aK0	clonotype1819aKO	1	TRB:CASSPGTGGAPGQLYF;TRA:CAVSARGSSGNKLIF
clone_908_aK0	clonotype181aKO	1	TRB:CASSLVPANTEVFF;TRA:CAMRDNYAQGLTF
clone_909_aK0	clonotype1821aKO	1	TRA:CAASAYNVLYF
clone_910_aK0	clonotype1822aKO	1	TRA:CAGTGGYKVVF
clone_911_aK0	clonotype1823aKO	1	TRB:CASGEQGYTGQLYF
clone_912_aK0	clonotype1825aKO	1	TRB:CTCSADKSRGASNERLFF
clone_913_aK0	clonotype1826aKO	1	TRB:CASGDSGGAETLYF;TRA:CAAEAPGNTGKLIF
clone_914_aK0	clonotype1827aKO	1	TRB:CASGEPLSGNTLYF;TRA:CAVRGNSNNRIFF
clone_915_aK0	clonotype1828aKO	1	TRB:CASSITRTGGSQNTLYF;TRA:CAVSMVLSGSFNKLTF
clone_916_aK0	clonotype1829aKO	1	TRB:CASGDEDSAETLYF;TRA:CAVSPTGFASALTF
clone_917_aK0	clonotype1830aKO	1	TRB:CASGDDGVFF;TRA:CAARSGGSNAKLTF
clone_918_aK0	clonotype1831aKO	1	TRB:CATSSQNTLYF
clone_919_aK0	clonotype1832aKO	1	TRB:CASGELTDAFF
clone_920_aK0	clonotype1833aKO	1	TRB:CASGDAHEQYF
clone_921_aK0	clonotype1834aKO	1	TRB:CASGDGYEQYF
clone_922_aK0	clonotype1835aKO	1	TRB:CASSPQGEVFF
clone_923_aK0	clonotype1836aKO	1	TRB:CASSLHYEQYF
clone_924_aK0	clonotype1837aKO	1	TRB:CASSDWGTLYF
clone_925_aK0	clonotype1838aKO	1	TRB:CASSGGLEQYF
clone_926_aK0	clonotype1839aKO	1	TRB:CASGDAQAPLF;TRA:CAAEGSGGSNAKLTF
clone_927_aK0	clonotype1840aKO	1	TRB:CASSLGYEQYF;TRA:CAMGPASSGSWQLIF
clone_928_aK0	clonotype1841aKO	1	TRB:CASGDQGRLYF;TRA:CAARGSNYQLIW
clone_929_aK0	clonotype1843aKO	1	TRB:CTCSAPPGLGTVNQDTQYF;TRA:CALATSSGQKLVF
clone_930_aK0	clonotype1845aKO	1	TRB:CASGDEGEQYF;TRA:CAARGGSNAKLTF
clone_931_aK0	clonotype1846aKO	1	TRB:CASSLEYEQYF;TRA:CAASAGGNNKLTF
clone_932_aK0	clonotype1848aKO	1	TRA:CAARKGSNYQLIW
clone_933_aK0	clonotype1849aKO	1	TRA:CAASPSNYNVLYF
clone_934_aK0	clonotype1850aKO	1	TRA:CAARRNNNNAPRF
clone_935_aK0	clonotype1851aKO	1	TRA:CAARRNNNNAPRF
clone_936_aK0	clonotype1852aKO	1	TRA:CAASDYSNNRLTL
clone_937_aK0	clonotype1853aKO	1	TRA:CAASASSGSWQLIF
clone_938_aK0	clonotype1854aKO	1	TRA:CAASGQGGRALIF
clone_939_aK0	clonotype1855aKO	1	TRA:CAADNTNTGKLTF
clone_940_aK0	clonotype1856aKO	1	TRB:CASGDAGGVNQDTQYF
clone_941_aK0	clonotype1857aKO	1	TRB:CASGDADREVFF
clone_942_aK0	clonotype1858aKO	1	TRB:CASGDVWAIEYF
clone_943_aK0	clonotype1859aKO	1	TRB:CASGGGGNTLYF
clone_944_aK0	clonotype1860aKO	1	TRB:CARDRDNQAPLF
clone_945_aK0	clonotype1861aKO	1	TRB:CASSLGQYEQYF
clone_946_aK0	clonotype1862aKO	1	TRB:CASSLGGSEQYF;TRA:CALEPNTNKVVF
clone_947_aK0	clonotype1863aKO	1	TRB:CASGDWGGALYF;TRA:CAHNNNNAPRF
clone_948_aK0	clonotype1864aKO	1	TRB:CASSQQGNTLYF;TRA:CAMRGSALGRLHF
clone_949_aK0	clonotype1865aKO	1	TRB:CASSLDWNEQYF;TRA:CALENTGYQNFYF
clone_950_aK0	clonotype1866aKO	1	TRB:CASSLAQQAPLF;TRA:CAADTNAYKVIF
clone_951_aK0	clonotype1867aKO	1	TRB:CASSLKGWEQYF;TRA:CALSDRNTGNYKYVF;TRA:CVLSDMGYKLTF
clone_952_aK0	clonotype1869aKO	1	TRB:CASGDRGSDYTF;TRA:CAVSATGGNNKLTF
clone_953_aK0	clonotype186aKO	1	TRB:CASSLGQGAGNTLYF;TRA:CAASEHHGSSGNKLIF
clone_954_aK0	clonotype1870aKO	1	TRB:CASGDVGTEVFF;TRA:CALSDTGGYKVVF
clone_955_aK0	clonotype1871aKO	1	TRB:CASGDDNQAPLF;TRA:CAASHPNTGKLTF;TRA:CALSGGSNAKLTF
clone_956_aK0	clonotype1872aKO	1	TRB:CASSLGNSPLYF;TRA:CAASDNTNTGKLTF
clone_957_aK0	clonotype1873aKO	1	TRA:CAASGRAGNYKYVF
clone_958_aK0	clonotype1874aKO	1	TRA:CAASGTEGADRLTF
clone_959_aK0	clonotype1875aKO	1	TRA:CAANVNTGNYKYVF
clone_960_aK0	clonotype1876aKO	1	TRA:CAANVNTGNYKYVF
clone_961_aK0	clonotype1877aKO	1	TRA:CAANVNTGNYKYVF
clone_962_aK0	clonotype1878aKO	1	TRA:CAANVNTGNYKYVF
clone_963_aK0	clonotype1879aKO	1	TRA:CAASRGSNYNVLYF
clone_964_aK0	clonotype1880aKO	1	TRB:CASAGQGSETLYF
clone_965_aK0	clonotype1881aKO	1	TRB:CASGEGGADTQYF
clone_966_aK0	clonotype1882aKO	1	TRB:CASGGDSATEVFF
clone_967_aK0	clonotype1883aKO	1	TRB:CASGWTGEDTQYF
clone_968_aK0	clonotype1884aKO	1	TRB:CASGHFSNERLFF
clone_969_aK0	clonotype1885aKO	1	TRB:CASGPGQQDTQYF
clone_970_aK0	clonotype1886aKO	1	TRB:CASGENRNTEVFF
clone_971_aK0	clonotype1887aKO	1	TRB:CASGETGNSDYTF
clone_972_aK0	clonotype1888aKO	1	TRB:CASGEQNTGQLYF
clone_973_aK0	clonotype1889aKO	1	TRB:CASGEGTHYEQYF
clone_974_aK0	clonotype1890aKO	1	TRB:CASGDRSSYEQYF
clone_975_aK0	clonotype1891aKO	1	TRB:CASGDADNSPLYF
clone_976_aK0	clonotype1893aKO	1	TRB:CASGDGLGNTLYF
clone_977_aK0	clonotype1894aKO	1	TRB:CASAGQNQNTLYF
clone_978_aK0	clonotype1896aKO	1	TRB:CASSHRQGFEQYF
clone_979_aK0	clonotype1897aKO	1	TRB:CASSPSLDSPLYF
clone_980_aK0	clonotype1898aKO	1	TRB:CASSLEQINTLYF
clone_981_aK0	clonotype1899aKO	1	TRB:CASSLGGLDTQYF
clone_982_aK0	clonotype1900aKO	1	TRB:CASSGGAGDTQYF
clone_983_aK0	clonotype1901aKO	1	TRB:CASSPGPNSDYTF
clone_984_aK0	clonotype1902aKO	1	TRB:CASSDSANSDYTF
clone_985_aK0	clonotype1903aKO	1	TRB:CASSPGGYAEQFF
clone_986_aK0	clonotype1905aKO	1	TRB:CASSLAGGLEQYF
clone_987_aK0	clonotype1906aKO	1	TRB:CASSLETEDTQYF
clone_988_aK0	clonotype1907aKO	1	TRB:CASSSGQQNTLYF
clone_989_aK0	clonotype1908aKO	1	TRB:CASGDGGTGQLYF;TRA:CAADDGNEKITF;TRA:CALSSSNNRIFF
clone_990_aK0	clonotype1909aKO	1	TRB:CASGEDWGDTQYF;TRA:CAVSMGYKLTF
clone_991_aK0	clonotype190aKO	1	TRB:CASSPTGGAIYAEQFF;TRA:CALLNTEGADRLTF;TRA:CAVLASSSFSKLVF
clone_992_aK0	clonotype1910aKO	1	TRB:CASSSGTGDTQYF;TRA:CAAEADYANKMIF
clone_993_aK0	clonotype1912aKO	1	TRB:CASSATANSDYTF;TRA:CAAVNNAGAKLTF
clone_994_aK0	clonotype1913aKO	1	TRB:CASSPSGNSDYTF;TRA:CAMERGSALGRLHF
clone_995_aK0	clonotype1914aKO	1	TRB:CASSLTGGWEQYF;TRA:CALENSSGSWQLIF
clone_996_aK0	clonotype1916aKO	1	TRB:CASGDAGGYEQYF;TRA:CAMRGSSGSWQLIF;TRA:CAMVNTNTGKLTF
clone_997_aK0	clonotype1917aKO	1	TRB:CASSDWGGYEQYF;TRA:CAVSRTGGYKVVF
clone_998_aK0	clonotype1918aKO	1	TRB:CASGGTAQNTLYF;TRA:CAVSADQGGRALIF
clone_999_aK0	clonotype1919aKO	1	TRB:CASGDTSQDTQYF;TRA:CAVRYMGYKLTF
clone_1000_aK0	clonotype191aKO	1	TRB:CTCSTTGGAHAEQFF;TRA:CALSIYSNNRLTL
clone_1001_aK0	clonotype1920aKO	1	TRB:CASGDAPGYEQYF;TRA:CAVSIGTGGYKVVF
clone_1002_aK0	clonotype1921aKO	1	TRB:CASGDVGGQAPLF;TRB:CASSPGLGGRRNTQYF;TRA:CAASNNNNAPRF
clone_1003_aK0	clonotype1922aKO	1	TRB:CASGGPGYSDYTF;TRA:CALRWGGTGSKLSF
clone_1004_aK0	clonotype1923aKO	1	TRB:CASGLGVSYEQYF;TRA:CALEGRGTGSKLSF
clone_1005_aK0	clonotype1924aKO	1	TRB:CASGVGNQNTLYF;TRA:CAVRDPPWGSSGNKLIF
clone_1006_aK0	clonotype1926aKO	1	TRB:CASGEGLGASQYF;TRA:CAASKTASLGKLQF
clone_1007_aK0	clonotype1928aKO	1	TRB:CASGDVWGDTLYF;TRA:CVVGDRGSALGRLHF
clone_1008_aK0	clonotype1929aKO	1	TRB:CASSYDPNSDYTF;TRA:CALGDQGGRALIF
clone_1009_aK0	clonotype1930aKO	1	TRB:CASSGGATYEQYF;TRA:CAASPLLGSGGKLTL
clone_1010_aK0	clonotype1931aKO	1	TRB:CASSLGGSSEQYF;TRA:CAVSAGGTQVVGQLTF
clone_1011_aK0	clonotype1932aKO	1	TRB:CASGEGWGGEQYF;TRA:CAAITGANTGKLTF
clone_1012_aK0	clonotype1933aKO	1	TRA:CAASDQANAGAKLTF
clone_1013_aK0	clonotype1934aKO	1	TRB:CASGTGTGNTEVFF
clone_1014_aK0	clonotype1935aKO	1	TRB:CASGLQGDNQAPLF
clone_1015_aK0	clonotype1936aKO	1	TRB:CASGLQGDNQAPLF
clone_1016_aK0	clonotype1937aKO	1	TRB:CASGPTRDTYEQYF
clone_1017_aK0	clonotype1938aKO	1	TRB:CASGPGTGGYEQYF
clone_1018_aK0	clonotype193aKO	1	TRB:CASSPGTTNTEVFF;TRA:CALSDRSNYNVLYF
clone_1019_aK0	clonotype1940aKO	1	TRB:CASGELGNYAEQFF
clone_1020_aK0	clonotype1941aKO	1	TRB:CASGDGGNQDTQYF
clone_1021_aK0	clonotype1942aKO	1	TRB:CASGDWGGANTQYF
clone_1022_aK0	clonotype1943aKO	1	TRB:CASGDPGAYAEQFF
clone_1023_aK0	clonotype1944aKO	1	TRB:CASGDAGLDSDYTF
clone_1024_aK0	clonotype1945aKO	1	TRB:CASGDAGGGQAPLF
clone_1025_aK0	clonotype1946aKO	1	TRB:CASGARRGGNTLYF
clone_1026_aK0	clonotype1947aKO	1	TRB:CASGGDRDGTEVFF
clone_1027_aK0	clonotype1949aKO	1	TRB:CASGSGGSTGQLYF
clone_1028_aK0	clonotype1950aKO	1	TRB:CASSLEGDTGQLYF
clone_1029_aK0	clonotype1951aKO	1	TRB:CASSLTGGFSDYTF
clone_1030_aK0	clonotype1952aKO	1	TRB:CASSHSGDQNTLYF
clone_1031_aK0	clonotype1954aKO	1	TRB:CASSPGLGGYEQYF
clone_1032_aK0	clonotype1955aKO	1	TRB:CASSRGASQNTLYF
clone_1033_aK0	clonotype1956aKO	1	TRB:CASSLGQSSYEQYF
clone_1034_aK0	clonotype1957aKO	1	TRB:CASSLRTGGYEQYF
clone_1035_aK0	clonotype1958aKO	1	TRB:CASSLWGNYAEQFF
clone_1036_aK0	clonotype1959aKO	1	TRB:CASSLTDSQNTLYF
clone_1037_aK0	clonotype1960aKO	1	TRB:CASGEGRGRERLFF;TRA:CASSGSWQLIF
clone_1038_aK0	clonotype1961aKO	1	TRB:CASGRQGANSDYTF;TRA:CAANYNQGKLIF;TRA:CAMREGSSGSWQLIF
clone_1039_aK0	clonotype1962aKO	1	TRB:CASSLRSSAETLYF;TRA:CIVTDMTNTGKLTF
clone_1040_aK0	clonotype1963aKO	1	TRB:CASGDRGLYAEQFF;TRA:CAASMSNMGYKLTF;TRA:CAMELPGGYKVVF
clone_1041_aK0	clonotype1964aKO	1	TRB:CASGGDWGGYEQYF;TRA:CATNGSSGNKLIF
clone_1042_aK0	clonotype1965aKO	1	TRB:CASSLTGAGSDYTF;TRA:CALVMDSNYQLIW
clone_1043_aK0	clonotype1966aKO	1	TRB:CASSLNGANSDYTF;TRA:CAIDNQGGRALIF
clone_1044_aK0	clonotype1968aKO	1	TRB:CASSLVGNTGQLYF;TRA:CAAEADNNNAPRF
clone_1045_aK0	clonotype1969aKO	1	TRB:CASARTYSGNTLYF;TRA:CALERGQGGRALIF
clone_1046_aK0	clonotype1970aKO	1	TRB:CASGRTESNTEVFF;TRA:CALELDYGNEKITF
clone_1047_aK0	clonotype1971aKO	1	TRB:CASGDAGGAIEQYF;TRA:CAALAYQGGRALIF;TRA:CAARGATSSGQKLVF
clone_1048_aK0	clonotype1972aKO	1	TRB:CASGDGLGGYEQYF;TRA:CATDVNTGKLTF
clone_1049_aK0	clonotype1973aKO	1	TRB:CASGGTGGAETLYF;TRA:CAVSRNNNAPRF
clone_1050_aK0	clonotype1974aKO	1	TRB:CASSPDSNQDTQYF;TRA:CILRVEDTEGADRLTF
clone_1051_aK0	clonotype1975aKO	1	TRB:CASARDRDTSDYTF;TRA:CILRVAKATGGNNKLTF
clone_1052_aK0	clonotype1976aKO	1	TRB:CASSLAGESSDYTF;TRA:CAVRMDYANKMIF
clone_1053_aK0	clonotype1977aKO	1	TRB:CASSLGTGGERLFF;TRA:CALRDYGNEKITF
clone_1054_aK0	clonotype1978aKO	1	TRB:CASSSGQPNSDYTF;TRA:CAVSMDYANKMIF
clone_1055_aK0	clonotype1979aKO	1	TRB:CASGAGTGQDTQYF;TRA:CALRGSSNTNKVVF;TRA:CAVSLNYNQGKLIF
clone_1056_aK0	clonotype1980aKO	1	TRB:CASGDAWGEDTQYF;TRA:CAASASSGSWQLIF
clone_1057_aK0	clonotype1981aKO	1	TRB:CASGDGLGGLEQYF;TRA:CAVSMNTGYQNFYF
clone_1058_aK0	clonotype1982aKO	1	TRB:CASSPGQGNSPLYF;TRA:CAPNYGNEKITF
clone_1059_aK0	clonotype1983aKO	1	TRB:CASSLGGAEDTQYF;TRA:CAASSGGNNKLTF;TRA:CALERGSGGSNYKLTF
clone_1060_aK0	clonotype1984aKO	1	TRB:CASGDWGGQDTQYF;TRA:CAASVRGNEKITF
clone_1061_aK0	clonotype1985aKO	1	TRB:CASSPGYSGNTLYF;TRA:CALSSSSGSWQLIF
clone_1062_aK0	clonotype1987aKO	1	TRB:CASSLQGGNPPLYF;TRA:CAARPSSNTNKVVF
clone_1063_aK0	clonotype1988aKO	1	TRB:CASSPPYSAETLYF;TRA:CALDPDYSNNRLTL
clone_1064_aK0	clonotype1989aKO	1	TRB:CASGEGWGAAEQFF;TRA:CALGSSGSWQLIF
clone_1065_aK0	clonotype1990aKO	1	TRB:CASGDAGGTGQLYF;TRA:CALSDLWNQGKLIF
clone_1066_aK0	clonotype1991aKO	1	TRB:CASGDAGSQNTLYF;TRA:CAMVTQVVGQLTF
clone_1067_aK0	clonotype1994aKO	1	TRB:CASSLGDRFYEQYF;TRA:CALGEPSGSWQLIF
clone_1068_aK0	clonotype1995aKO	1	TRB:CASGDAGTNSDYTF;TRA:CALGDPGTGGYKVVF
clone_1069_aK0	clonotype1996aKO	1	TRB:CASSRRLGGSEQYF;TRA:CAASPPGNYKYVF
clone_1070_aK0	clonotype1998aKO	1	TRB:CASSLGLSQNTLYF;TRA:CAASEQGTGSKLSF
clone_1071_aK0	clonotype1999aKO	1	TRB:CASSPGLGDYEQYF;TRA:CAARRNYNQGKLIF
clone_1072_aK0	clonotype2000aKO	1	TRA:CALSGMGYKLTF
clone_1073_aK0	clonotype2003aKO	1	TRB:CASGEGGANTGQLYF
clone_1074_aK0	clonotype2004aKO	1	TRB:CASGDTGVSNERLFF
clone_1075_aK0	clonotype2005aKO	1	TRB:CASGDHRASGNTLYF
clone_1076_aK0	clonotype2006aKO	1	TRB:CASGDAGGTGNTLYF
clone_1077_aK0	clonotype2007aKO	1	TRB:CASGDATGGFAEQFF
clone_1078_aK0	clonotype2008aKO	1	TRB:CASGDGQGFNQAPLF
clone_1079_aK0	clonotype200aKO	1	TRB:CASSLVGGAAAEQFF;TRB:CTCSAEGLGVSAETLYF;TRA:CVLSANTGYQNFYF
clone_1080_aK0	clonotype2010aKO	1	TRB:CASGDWDWVQDTQYF
clone_1081_aK0	clonotype2011aKO	1	TRB:CASGADRGRAETLYF
clone_1082_aK0	clonotype2013aKO	1	TRB:CASGADRGRAETLYF
clone_1083_aK0	clonotype2014aKO	1	TRB:CASGGLGGYSYEQYF
clone_1084_aK0	clonotype2015aKO	1	TRB:CASGGDRGRAETLYF
clone_1085_aK0	clonotype2016aKO	1	TRB:CASGGTGGNYAEQFF
clone_1086_aK0	clonotype2017aKO	1	TRB:CASGGTGGNYAEQFF
clone_1087_aK0	clonotype2018aKO	1	TRB:CASGGTGGNYAEQFF
clone_1088_aK0	clonotype2019aKO	1	TRB:CASGGGTNNQDTQYF
clone_1089_aK0	clonotype2020aKO	1	TRB:CASSPDRISNERLFF
clone_1090_aK0	clonotype2021aKO	1	TRB:CASSRDWGVAETLYF
clone_1091_aK0	clonotype2022aKO	1	TRB:CASSLGTANTGQLYF
clone_1092_aK0	clonotype2023aKO	1	TRB:CASSAHRGSYAEQFF
clone_1093_aK0	clonotype2024aKO	1	TRB:CASSLDWGYQDTQYF
clone_1094_aK0	clonotype2025aKO	1	TRB:CASSLAGQGVAEQFF
clone_1095_aK0	clonotype2027aKO	1	TRB:CASSLGLGSAETLYF
clone_1096_aK0	clonotype2028aKO	1	TRB:CASSQNWGSYAEQFF
clone_1097_aK0	clonotype2029aKO	1	TRB:CASSPSGGAYAEQFF
clone_1098_aK0	clonotype2030aKO	1	TRB:CASSPRQDANSDYTF
clone_1099_aK0	clonotype2031aKO	1	TRB:CASSLGTGGGAEQFF
clone_1100_aK0	clonotype2032aKO	1	TRB:CASSSRLGGYAEQFF
clone_1101_aK0	clonotype2033aKO	1	TRB:CASSSRLGGYAEQFF
clone_1102_aK0	clonotype2034aKO	1	TRB:CASSLGDNLNTEVFF;TRA:CAMELRNYQLIW
clone_1103_aK0	clonotype2035aKO	1	TRB:CASGEAGGSNERLFF;TRA:CAAEGYNQGKLIF
clone_1104_aK0	clonotype2036aKO	1	TRB:CASSLDDRANSDYTF;TRA:CAMDRDSNYQLIW
clone_1105_aK0	clonotype2037aKO	1	TRB:CASSLDGISNERLFF;TRA:CAAEDTNTGKLTF
clone_1106_aK0	clonotype2038aKO	1	TRB:CASSPWGENYAEQFF;TRA:CAIDRWSNYQLIW
clone_1107_aK0	clonotype2039aKO	1	TRB:CASSPHWGNQDTQYF;TRA:CALERRDSNYQLIW
clone_1108_aK0	clonotype203aKO	1	TRB:CAWSPPQYF
clone_1109_aK0	clonotype2041aKO	1	TRB:CASGGTGGNYAEQFF;TRA:CAVSMTGYQNFYF
clone_1110_aK0	clonotype2042aKO	1	TRB:CASSPRPVSQNTLYF;TRA:CALSDNYAQGLTF
clone_1111_aK0	clonotype2043aKO	1	TRB:CASSLWTGGSYEQYF;TRA:CALDGDNNAGAKLTF
clone_1112_aK0	clonotype2044aKO	1	TRB:CASSRLGGGAETLYF;TRA:CATEDSGYNKLTF
clone_1113_aK0	clonotype2045aKO	1	TRB:CASSLDWGNYAEQFF;TRA:CAVTLNAYKVIF
clone_1114_aK0	clonotype2046aKO	1	TRB:CASGPTGGAPAEQFF;TRA:CAVIPSSGSWQLIF
clone_1115_aK0	clonotype2047aKO	1	TRB:CASGAGQDSGNTLYF;TRA:CALSRSNMGYKLTF
clone_1116_aK0	clonotype2048aKO	1	TRB:CASSLGHNSNERLFF;TRA:CAAFNYAQGLTF
clone_1117_aK0	clonotype204aKO	1	TRA:CAISNNRIFF
clone_1118_aK0	clonotype2052aKO	1	TRB:CASGVGTDYNSPLYF;TRA:CAASYQGGRALIF
clone_1119_aK0	clonotype2053aKO	1	TRB:CASSLQGDSGNTLYF;TRA:CAASDNNRIFF;TRA:CALSLDYANKMIF
clone_1120_aK0	clonotype2054aKO	1	TRB:CASSLSDGSSYEQYF;TRA:CALGVNYAQGLTF
clone_1121_aK0	clonotype2055aKO	1	TRB:CASSAPGQGQNTLYF;TRA:CALGDQGGRALIF
clone_1122_aK0	clonotype2057aKO	1	TRB:CASSLGTGGAYEQYF;TRA:CAATPDTGYQNFYF
clone_1123_aK0	clonotype2058aKO	1	TRB:CASGAREGTGNTLYF;TRA:CVVGDRGSALGRLHF
clone_1124_aK0	clonotype2059aKO	1	TRB:CASSLVGGRHAEQFF;TRA:CVLTGMQQGTGSKLSF
clone_1125_aK0	clonotype205aKO	1	TRB:CAWSLYEQYF
clone_1126_aK0	clonotype2060aKO	1	TRB:CASSLEDISGNTLYF;TRA:CALGDPNSAGNKLTF
clone_1127_aK0	clonotype2062aKO	1	TRB:CASSPGGAHYAEQFF;TRA:CALGAYNYAQGLTF
clone_1128_aK0	clonotype2063aKO	1	TRB:CASGAATGSAETLYF;TRA:CAMREGGAGNTGKLIF
clone_1129_aK0	clonotype2064aKO	1	TRB:CASSLEGTYNQAPLF;TRA:CAMREGGGSALGRLHF
clone_1130_aK0	clonotype2065aKO	1	TRB:CASGGGQGGTGQLYF;TRA:CAASNSGSWQLIF
clone_1131_aK0	clonotype2066aKO	1	TRB:CASSLGTGGAYEQYF;TRA:CAASEDQGGRALIF
clone_1132_aK0	clonotype2067aKO	1	TRB:CASPLHRENTGQLYF;TRA:CAASGTDYNQGKLIF
clone_1133_aK0	clonotype2068aKO	1	TRB:CASGDPGGGAETLYF;TRA:CALSETGNTGKLIF
clone_1134_aK0	clonotype2069aKO	1	TRB:CASGAGTGRANTEVFF
clone_1135_aK0	clonotype206aKO	1	TRB:CASSDFEQYF
clone_1136_aK0	clonotype2070aKO	1	TRB:CASGEQGAFNQDTQYF
clone_1137_aK0	clonotype2071aKO	1	TRB:CASGEGTGVNYAEQFF
clone_1138_aK0	clonotype2072aKO	1	TRB:CASGVPGQGADTEVFF
clone_1139_aK0	clonotype2073aKO	1	TRB:CASSLRDWGFYAEQFF
clone_1140_aK0	clonotype2075aKO	1	TRB:CASSLSGAGSQNTLYF
clone_1141_aK0	clonotype2076aKO	1	TRB:CASSHRDTYNYAEQFF
clone_1142_aK0	clonotype2077aKO	1	TRB:CASSPPDKISNERLFF
clone_1143_aK0	clonotype2078aKO	1	TRB:CASSPFRGGSAETLYF
clone_1144_aK0	clonotype2079aKO	1	TRB:CASSLEDWGDTGQLYF
clone_1145_aK0	clonotype207aKO	1	TRB:CGDRQGEQYF;TRA:CAADTNAYKVIF
clone_1146_aK0	clonotype2080aKO	1	TRB:CASSAGLGGSQNTLYF
clone_1147_aK0	clonotype2082aKO	1	TRB:CASGDYRGYSGNTLYF;TRA:CILRVADTGANTGKLTF
clone_1148_aK0	clonotype2083aKO	1	TRB:CASSLGLGASAETLYF;TRA:CATDNYSNNRLTL
clone_1149_aK0	clonotype2084aKO	1	TRB:CASGDAPKISNERLFF;TRA:CAASMNYNQGKLIF
clone_1150_aK0	clonotype2086aKO	1	TRB:CASGDVLGARQDTQYF;TRA:CALSPSGSWQLIF
clone_1151_aK0	clonotype2089aKO	1	TRB:CASSLGDRQDAETLYF;TRA:CALVEASSGQKLVF
clone_1152_aK0	clonotype208aKO	1	TRB:CAWSQAAEQFF
clone_1153_aK0	clonotype2090aKO	1	TRB:CASSLGQGEGAETLYF;TRA:CAMRATSSGQKLVF
clone_1154_aK0	clonotype2091aKO	1	TRA:CALSYNTGNYKYVF
clone_1155_aK0	clonotype2092aKO	1	TRB:CASGDVPGLGGQDTQYF
clone_1156_aK0	clonotype2093aKO	1	TRB:CASSLGSGGYNYAEQFF
clone_1157_aK0	clonotype2094aKO	1	TRB:CASSQRLGGRAQNTLYF;TRA:CATDDTNAYKVIF
clone_1158_aK0	clonotype2095aKO	1	TRB:CASGDGTGGADTGQLYF;TRA:CAASAGYNQGKLIF
clone_1159_aK0	clonotype2096aKO	1	TRA:CALSDLAGGNNKLTF
clone_1160_aK0	clonotype2097aKO	1	TRB:CASGVSGTGDPFSNERLFF
clone_1161_aK0	clonotype209aKO	1	TRA:CILFTGSGGKLTL
clone_1162_aK0	clonotype210aKO	1	TRA:CILFTGSGGKLTL
clone_1163_aK0	clonotype211aKO	1	TRB:CGARGDSIPLF
clone_1164_aK0	clonotype212aKO	1	TRB:CASSLGGQYAEQFF;TRB:CAWSLDSDYTF;TRA:CAISSNTNKVVF
clone_1165_aK0	clonotype213aKO	1	TRB:CASSQATQYF;TRA:CAVREDNTGKLTF
clone_1166_aK0	clonotype214aKO	1	TRB:CASRASAETLYF;TRB:CAWEQDYEQYF;TRA:CAMENTGNYKYVF
clone_1167_aK0	clonotype215aKO	1	TRB:CASSQDTQYF;TRB:CASSQSAGGDNQAPLF;TRA:CAARAGNTGKLIF;TRA:CALGDYSNNRLTL
clone_1168_aK0	clonotype216aKO	1	TRB:CASSSSYEQYF;TRA:CAVSSGGNYKPTF
clone_1169_aK0	clonotype217aKO	1	TRB:CASRGQGYNYAEQFF;TRB:CAWSGVYEQYF;TRA:CAASASSYGSSGNKLIF;TRA:CATGANYGNEKITF
clone_1170_aK0	clonotype218aKO	1	TRB:CASINTGQLYF;TRA:CAMREGAGYQNFYF
clone_1171_aK0	clonotype219aKO	1	TRB:CASGDHLQYF;TRA:CAPTLMDYANKMIF
clone_1172_aK0	clonotype220aKO	1	TRB:CASSFGTEVFF;TRB:CGAREGAEVFF;TRA:CALSETGFASALTF
clone_1173_aK0	clonotype221aKO	1	TRB:CASSLSGGLSYEQYF;TRB:CGAMSPYEQYF;TRA:CAASSGESWQLIF
clone_1174_aK0	clonotype222aKO	1	TRA:CAMRSGSWQLIF
clone_1175_aK0	clonotype223aKO	1	TRA:CAITEGADRLTF
clone_1176_aK0	clonotype224aKO	1	TRB:CASSQETEQFF
clone_1177_aK0	clonotype225aKO	1	TRB:CASSQETEQFF
clone_1178_aK0	clonotype226aKO	1	TRB:CASSQETEQFF
clone_1179_aK0	clonotype227aKO	1	TRA:CAAEYYAQGLTF
clone_1180_aK0	clonotype228aKO	1	TRB:CARTQGNTEVFF
clone_1181_aK0	clonotype229aKO	1	TRB:CAWSQGRDTLYF
clone_1182_aK0	clonotype230aKO	1	TRB:CAWSLRDSDYTF
clone_1183_aK0	clonotype231aKO	1	TRB:CAWDQGRTEVFF
clone_1184_aK0	clonotype232aKO	1	TRB:CASRGINTLYF
clone_1185_aK0	clonotype233aKO	1	TRB:CASGDSYEQYF
clone_1186_aK0	clonotype234aKO	1	TRB:CASGDVDEQYF
clone_1187_aK0	clonotype235aKO	1	TRB:CASKETNYEQYF
clone_1188_aK0	clonotype236aKO	1	TRB:CASRDTNSDYTF
clone_1189_aK0	clonotype237aKO	1	TRB:CASRDSAETLYF
clone_1190_aK0	clonotype238aKO	1	TRB:CASRDSAETLYF
clone_1191_aK0	clonotype239aKO	1	TRB:CASRDSAETLYF
clone_1192_aK0	clonotype240aKO	1	TRB:CASRDSAETLYF
clone_1193_aK0	clonotype241aKO	1	TRB:CASSDATDEQYF
clone_1194_aK0	clonotype242aKO	1	TRB:CASSDAAERLFF
clone_1195_aK0	clonotype243aKO	1	TRB:CASSDAAERLFF
clone_1196_aK0	clonotype244aKO	1	TRB:CASSDAAERLFF
clone_1197_aK0	clonotype245aKO	1	TRB:CASSDAAERLFF
clone_1198_aK0	clonotype246aKO	1	TRB:CASSDAAERLFF
clone_1199_aK0	clonotype247aKO	1	TRB:CASSSNEQYF
clone_1200_aK0	clonotype248aKO	1	TRB:CSSGGRSTEVFF
clone_1201_aK0	clonotype249aKO	1	TRB:CGARQGGAEQFF
clone_1202_aK0	clonotype250aKO	1	TRB:CGARTSNSDYTF
clone_1203_aK0	clonotype251aKO	1	TRB:CGARVPGERLFF
clone_1204_aK0	clonotype252aKO	1	TRB:CGGTGVNQAPLF
clone_1205_aK0	clonotype253aKO	1	TRB:CGARDQANSDYTF;TRB:CGARQGVTEVFF;TRA:CAIGRGYKLTF;TRA:CLGYKLTF
clone_1206_aK0	clonotype254aKO	1	TRB:CASSDGNSDYTF;TRA:CALNTNTGKLTF
clone_1207_aK0	clonotype255aKO	1	TRB:CAWSLTNERLFF;TRA:CAAENTGYQNFYF
clone_1208_aK0	clonotype256aKO	1	TRB:CAWSLARGEQYF;TRA:CAHLYGSSGNKLIF
clone_1209_aK0	clonotype257aKO	1	TRB:CAGLGDGNTLYF;TRA:CALRNNNNAPRF
clone_1210_aK0	clonotype258aKO	1	TRB:CAWSPRGQAPLF;TRA:CAVPLPGTGSNRLTF
clone_1211_aK0	clonotype259aKO	1	TRB:CAWSLGITEVFF;TRA:CAVSIRSNNRIFF
clone_1212_aK0	clonotype260aKO	1	TRB:CASSLRDNAETLYF;TRB:CASSNRDEQYF;TRA:CAAPIASSSFSKLVF
clone_1213_aK0	clonotype261aKO	1	TRB:CGARLGGYEQYF;TRA:CAVRANSGTYQRF
clone_1214_aK0	clonotype263aKO	1	TRB:CAWSRGPERLFF;TRA:CALGGGSNYKLTF;TRA:CAVSLPTGGNNKLTF
clone_1215_aK0	clonotype264aKO	1	TRB:CAWSLRQNTLYF;TRA:CVLSDDSGYNKLTF
clone_1216_aK0	clonotype265aKO	1	TRB:CASGAKDTQYF;TRA:CAASITNYNVLYF
clone_1217_aK0	clonotype266aKO	1	TRB:CASSGTGDEQYF;TRA:CAARPSGSWQLIF
clone_1218_aK0	clonotype267aKO	1	TRB:CGARGGGYEQYF;TRA:CALTSSNYNVLYF
clone_1219_aK0	clonotype268aKO	1	TRB:CAWSWGTYEQYF;TRA:CAASAGTGNYKYVF
clone_1220_aK0	clonotype270aKO	1	TRB:CASSNRGAEQFF;TRA:CAVSDTSNYNVLYF
clone_1221_aK0	clonotype271aKO	1	TRB:CGARADRGEVFF;TRA:CVLGRNYGSSGNKLIF
clone_1222_aK0	clonotype272aKO	1	TRB:CASSGGNTEVFF;TRA:CALIRNYNQGKLIF
clone_1223_aK0	clonotype273aKO	1	TRB:CASSDPGYEQYF;TRA:CALGDTGANTGKLTF
clone_1224_aK0	clonotype274aKO	1	TRB:CASSPSDYTF;TRB:CASSWTGTTGQLYF;TRA:CALSEAGGNYKPTF
clone_1225_aK0	clonotype275aKO	1	TRB:CAWSLDRGEVFF;TRA:CALGRGASSSFSKLVF
clone_1226_aK0	clonotype276aKO	1	TRB:CASLGGAETLYF;TRA:CAATGDSGGSNYKLTF
clone_1227_aK0	clonotype277aKO	1	TRB:CASSPPREGPGQLYF;TRB:CGAREGYSDYTF;TRA:CALSDQDTNTGKLTF
clone_1228_aK0	clonotype278aKO	1	TRB:CSSTGSSYEQYF;TRA:CAASEGYNVLYF
clone_1229_aK0	clonotype279aKO	1	TRB:CASSTAEVFF;TRA:CAARAGTGSNRLTF
clone_1230_aK0	clonotype280aKO	1	TRB:CASRTGQYF;TRB:CASSLAGSQNTLYF;TRA:CAGASSGSWQLIF
clone_1231_aK0	clonotype281aKO	1	TRB:CASSDGGTEVFF;TRA:CAASSGSNYQLIW
clone_1232_aK0	clonotype282aKO	1	TRB:CGARARRDTQYF;TRA:CAASGDSGTYQRF
clone_1233_aK0	clonotype283aKO	1	TRA:CAAGSNYQLIW
clone_1234_aK0	clonotype284aKO	1	TRA:CARASSGSWQLIF
clone_1235_aK0	clonotype285aKO	1	TRA:CAMEPANAYKVIF
clone_1236_aK0	clonotype286aKO	1	TRB:CASNANTEVFF
clone_1237_aK0	clonotype287aKO	1	TRB:CASTDWGEQFF
clone_1238_aK0	clonotype288aKO	1	TRB:CASQGGDTQYF
clone_1239_aK0	clonotype289aKO	1	TRB:CASVMDERLFF
clone_1240_aK0	clonotype290aKO	1	TRB:CASRKGGSEQYF
clone_1241_aK0	clonotype291aKO	1	TRB:CASSQEGTEVFF
clone_1242_aK0	clonotype292aKO	1	TRB:CASSQDNYEQYF
clone_1243_aK0	clonotype293aKO	1	TRB:CASSDDNYEQYF
clone_1244_aK0	clonotype294aKO	1	TRA:CAAVPGNTGKLIF
clone_1245_aK0	clonotype296aKO	1	TRA:CAAEAANTGKLTF
clone_1246_aK0	clonotype297aKO	1	TRB:CAWKLGGEETLYF
clone_1247_aK0	clonotype298aKO	1	TRB:CAWNWGNYAEQFF
clone_1248_aK0	clonotype299aKO	1	TRB:CAWNQGDYAEQFF
clone_1249_aK0	clonotype300aKO	1	TRB:CAWSPGGANEQYF
clone_1250_aK0	clonotype301aKO	1	TRB:CAWSPNSQNTLYF
clone_1251_aK0	clonotype302aKO	1	TRB:CAWSPYRGETLYF
clone_1252_aK0	clonotype303aKO	1	TRB:CAWSLRANSDYTF
clone_1253_aK0	clonotype304aKO	1	TRB:CAWSLEGGLEQYF
clone_1254_aK0	clonotype305aKO	1	TRB:CAWSLEGWAEVFF
clone_1255_aK0	clonotype306aKO	1	TRB:CAWSLWNYAEQFF
clone_1256_aK0	clonotype307aKO	1	TRB:CAWSLRGATEVFF
clone_1257_aK0	clonotype308aKO	1	TRB:CAWSLGDGNTLYF
clone_1258_aK0	clonotype309aKO	1	TRB:CAWSGTANTEVFF
clone_1259_aK0	clonotype310aKO	1	TRB:CAWIQDSQNTLYF
clone_1260_aK0	clonotype311aKO	1	TRB:CAWGDWDYAEQFF
clone_1261_aK0	clonotype312aKO	1	TRB:CAWSSTYNSPLYF
clone_1262_aK0	clonotype313aKO	1	TRB:CASSFYAEQFF
clone_1263_aK0	clonotype314aKO	1	TRB:CASSQGTYEQYF
clone_1264_aK0	clonotype315aKO	1	TRB:CASSDDRYEQYF
clone_1265_aK0	clonotype316aKO	1	TRB:CASSVRKNTLYF
clone_1266_aK0	clonotype317aKO	1	TRB:CASGDAKDTQYF
clone_1267_aK0	clonotype318aKO	1	TRB:CASSRDRNAEQFF
clone_1268_aK0	clonotype319aKO	1	TRB:CASSDDRNTEVFF
clone_1269_aK0	clonotype321aKO	1	TRB:CASSNWGSDEQYF
clone_1270_aK0	clonotype322aKO	1	TRB:CASSHRSAETLYF
clone_1271_aK0	clonotype323aKO	1	TRB:CASSEQKNTEVFF
clone_1272_aK0	clonotype324aKO	1	TRB:CASSDAQGGEQFF
clone_1273_aK0	clonotype325aKO	1	TRB:CASSDAGLYEQYF
clone_1274_aK0	clonotype326aKO	1	TRB:CASSDGRDERLFF
clone_1275_aK0	clonotype327aKO	1	TRB:CASGGTHNTEVFF
clone_1276_aK0	clonotype328aKO	1	TRB:CASSQRDEQYF
clone_1277_aK0	clonotype329aKO	1	TRB:CSSSTGSGNTLYF
clone_1278_aK0	clonotype331aKO	1	TRB:CGASREKNTEVFF
clone_1279_aK0	clonotype332aKO	1	TRB:CGASRDSRSDYTF
clone_1280_aK0	clonotype333aKO	1	TRB:CGARTASAETLYF
clone_1281_aK0	clonotype334aKO	1	TRB:CGARDWGVYEQYF
clone_1282_aK0	clonotype335aKO	1	TRB:CGAHWGSAETLYF
clone_1283_aK0	clonotype336aKO	1	TRB:CGARTGGVAEQFF
clone_1284_aK0	clonotype337aKO	1	TRB:CGAWTGYQDTQYF
clone_1285_aK0	clonotype339aKO	1	TRB:CGAGGGRQNTLYF;TRA:CAISNNRIFF
clone_1286_aK0	clonotype341aKO	1	TRB:CASSGTKYEQYF;TRA:CAAEEGGRALIF
clone_1287_aK0	clonotype342aKO	1	TRB:CASSETGNTEVFF;TRA:CATDASGSWQLIF
clone_1288_aK0	clonotype344aKO	1	TRB:CASSPLDRGVEQYF;TRB:CGARDPDSYEQYF;TRA:CAINYSNNRLTL
clone_1289_aK0	clonotype345aKO	1	TRB:CGARDLANSDYTF;TRA:CAMGTGGYKVVF
clone_1290_aK0	clonotype346aKO	1	TRB:CAWSLGDNSPLYF;TRA:CAAASSGSWQLIF
clone_1291_aK0	clonotype347aKO	1	TRB:CAWSLGDQDTQYF;TRA:CAPNSGGSNAKLTF
clone_1292_aK0	clonotype348aKO	1	TRB:CASSDREETLYF;TRA:CALATGNTGKLIF
clone_1293_aK0	clonotype350aKO	1	TRB:CASRGVGENTLYF;TRB:CASSLDGGWNQNTLYF;TRA:CALLHDTNAYKVIF
clone_1294_aK0	clonotype351aKO	1	TRB:CASSDGYSYEQYF;TRA:CAIASSSFSKLVF
clone_1295_aK0	clonotype352aKO	1	TRB:CASSQRGEVFF;TRA:CAIRMDSNYQLIW
clone_1296_aK0	clonotype353aKO	1	TRB:CGAREGVSYEQYF;TRA:CAASEEDYANKMIF;TRA:CAVNSNNRIFF
clone_1297_aK0	clonotype354aKO	1	TRB:CASSDRNSDYTF;TRA:CAVRNSNNRIFF
clone_1298_aK0	clonotype355aKO	1	TRB:CASSDRSYEQYF;TRA:CAARDSNYQLIW
clone_1299_aK0	clonotype356aKO	1	TRB:CASSDGQKDTQYF;TRA:CAMNYNQGKLIF
clone_1300_aK0	clonotype357aKO	1	TRB:CASSADRGRTLYF;TRA:CILRARASSSFSKLVF
clone_1301_aK0	clonotype358aKO	1	TRB:CASSVGGGNTLYF;TRA:CAGTGGNNKLTF
clone_1302_aK0	clonotype359aKO	1	TRB:CGAREGKDTEVFF;TRA:CAVSRSNNRIFF
clone_1303_aK0	clonotype360aKO	1	TRB:CGAGGQGNSDYTF;TRA:CAENYNQGKLIF
clone_1304_aK0	clonotype361aKO	1	TRB:CASRGRGSQYF;TRA:CAASAHSNYQLIW;TRA:CAVSATDNYAQGLTF
clone_1305_aK0	clonotype362aKO	1	TRB:CAWTWGGQNTLYF;TRA:CAVRRSALGRLHF
clone_1306_aK0	clonotype363aKO	1	TRB:CAWSGQNNQAPLF;TRA:CALSNYGNEKITF
clone_1307_aK0	clonotype364aKO	1	TRB:CASSDRGNTLYF;TRA:CAAEGAGANTGKLTF
clone_1308_aK0	clonotype365aKO	1	TRB:CGAGGGRQNTLYF;TRA:CAVRGNMGYKLTF
clone_1309_aK0	clonotype366aKO	1	TRB:CASLGGAGQLYF;TRA:CAARVTGNTGKLIF
clone_1310_aK0	clonotype367aKO	1	TRB:CASGDINSDYTF;TRA:CAASHDTNAYKVIF
clone_1311_aK0	clonotype368aKO	1	TRB:CSSRRTNSYEQYF;TRA:CAASLASNYNVLYF
clone_1312_aK0	clonotype369aKO	1	TRB:CGARPSVNSDYTF;TRA:CAPRNYNQGKLIF;TRA:CVLKTGNTGKLIF
clone_1313_aK0	clonotype370aKO	1	TRB:CGARDNSGNTLYF;TRA:CAASWGTGGYKVVF
clone_1314_aK0	clonotype371aKO	1	TRB:CGAADRSYAEQFF;TRA:CVLSAYSNNRIFF
clone_1315_aK0	clonotype372aKO	1	TRB:CAWSDRANTEVFF;TRA:CAASFLAKGKLIF
clone_1316_aK0	clonotype373aKO	1	TRB:CAWSLQGNSDYTF;TRA:CALFNTGNYKYVF
clone_1317_aK0	clonotype374aKO	1	TRB:CASRDRGGAEQFF;TRA:CAASERIGSFNKLTF
clone_1318_aK0	clonotype375aKO	1	TRB:CASSDTGKNTLYF;TRA:CAAVGANSAGNKLTF
clone_1319_aK0	clonotype376aKO	1	TRB:CGASGTKNTEVFF;TRA:CALRVYQGGRALIF
clone_1320_aK0	clonotype377aKO	1	TRB:CAWSLGSAETLYF;TRA:CAARSGGSNAKLTF;TRA:CALVSMDYANKMIF
clone_1321_aK0	clonotype378aKO	1	TRB:CASSDAGNYEQYF;TRA:CAVSGGYSNNRLTL
clone_1322_aK0	clonotype379aKO	1	TRB:CGARTGGAGEQYF;TRA:CALGGMGYKLTF
clone_1323_aK0	clonotype380aKO	1	TRB:CGARRHLNSDYTF;TRA:CAAQNLTGANTGKLTF
clone_1324_aK0	clonotype382aKO	1	TRB:CGARDADSDTQYF;TRA:CAASVTNSAGNKLTF
clone_1325_aK0	clonotype383aKO	1	TRB:CAWSQGQNTEVFF;TRA:CAMRERDTGNYKYVF
clone_1326_aK0	clonotype384aKO	1	TRB:CAWSPGSQNTLYF;TRA:CALGSNYGSSGNKLIF
clone_1327_aK0	clonotype385aKO	1	TRB:CGARRTVNTEVFF;TRA:CALGMNYNQGKLIF
clone_1328_aK0	clonotype387aKO	1	TRB:CASSIEGTGDTEVFF;TRB:CGALQGRKNTLYF;TRA:CALDPGTGGYKVVF
clone_1329_aK0	clonotype388aKO	1	TRB:CAWSTGEGSDYTF;TRA:CAARSNNRIFF
clone_1330_aK0	clonotype389aKO	1	TRB:CASSDQGNTEVFF;TRA:CAAMSNYNVLYF
clone_1331_aK0	clonotype390aKO	1	TRB:CAWRPGANTEVFF;TRA:CAASAGVVGQLTF
clone_1332_aK0	clonotype391aKO	1	TRB:CASSSDETLYF;TRA:CAASEVGYKLTF
clone_1333_aK0	clonotype393aKO	1	TRB:CASGDYTYEQYF;TRA:CAASGSSGSWQLIF
clone_1334_aK0	clonotype394aKO	1	TRB:CASGGLGDEQYF;TRA:CAASPSGYNKLTF
clone_1335_aK0	clonotype395aKO	1	TRB:CASGGSGNPLYF;TRA:CAASENTNTGKLTF
clone_1336_aK0	clonotype396aKO	1	TRB:CASSDPGQGGAETLYF;TRB:CGARETGQDTQYF;TRA:CAASVAGMGYKLTF
clone_1337_aK0	clonotype397aKO	1	TRB:CASSRTGASQNTLYF;TRB:CASSVDRGREQYF;TRA:CAASVDYNQGKLIF
clone_1338_aK0	clonotype398aKO	1	TRB:CAWIQNNNQAPLF;TRA:CAASEANSAGNKLTF
clone_1339_aK0	clonotype399aKO	1	TRB:CASSADRGRTLYF;TRA:CALSRSGGSNYKLTF
clone_1340_aK0	clonotype400aKO	1	TRA:CATSSNTNKVVF
clone_1341_aK0	clonotype401aKO	1	TRA:CAASNMGYKLTF
clone_1342_aK0	clonotype402aKO	1	TRA:CAARTNAYKVIF
clone_1343_aK0	clonotype404aKO	1	TRB:CASSPQNTEVFF
clone_1344_aK0	clonotype406aKO	1	TRB:CASSGDRNTLYF
clone_1345_aK0	clonotype407aKO	1	TRB:CASSQEANTEVFF
clone_1346_aK0	clonotype408aKO	1	TRB:CASSQDEGTEVFF
clone_1347_aK0	clonotype409aKO	1	TRB:CASSQGLQDTQYF
clone_1348_aK0	clonotype410aKO	1	TRB:CASSLHRGGTLYF
clone_1349_aK0	clonotype412aKO	1	TRB:CASSSGRNTEVFF
clone_1350_aK0	clonotype413aKO	1	TRA:CAAAANYGNEKITF
clone_1351_aK0	clonotype414aKO	1	TRA:CAAFSGGSNAKLTF
clone_1352_aK0	clonotype415aKO	1	TRA:CAAEAYQGGRALIF
clone_1353_aK0	clonotype416aKO	1	TRA:CAAEVTEGADRLTF
clone_1354_aK0	clonotype417aKO	1	TRA:CAVRGSSAGNKLTF
clone_1355_aK0	clonotype418aKO	1	TRB:CAYPPGQGNERLFF
clone_1356_aK0	clonotype419aKO	1	TRB:CAWRDWGSAETLYF
clone_1357_aK0	clonotype420aKO	1	TRB:CAWRGTGGHERLFF
clone_1358_aK0	clonotype421aKO	1	TRB:CAWSPGLGNYEQYF
clone_1359_aK0	clonotype422aKO	1	TRB:CAWSPRGGYAEQFF
clone_1360_aK0	clonotype423aKO	1	TRB:CAWSRGQGAPDYTF
clone_1361_aK0	clonotype424aKO	1	TRB:CAWSLGQGAVEQFF
clone_1362_aK0	clonotype425aKO	1	TRB:CAWSLGLDSYEQYF
clone_1363_aK0	clonotype426aKO	1	TRB:CAWSLRGPGNTLYF
clone_1364_aK0	clonotype427aKO	1	TRB:CAWSLHRGDSDYTF
clone_1365_aK0	clonotype428aKO	1	TRB:CAWSLEGATYEQYF
clone_1366_aK0	clonotype429aKO	1	TRB:CAWSLDRAGNTLYF
clone_1367_aK0	clonotype430aKO	1	TRB:CASSLRGEQYF
clone_1368_aK0	clonotype431aKO	1	TRB:CASSLDAEQFF
clone_1369_aK0	clonotype432aKO	1	TRB:CASSRDRRTLYF
clone_1370_aK0	clonotype433aKO	1	TRB:CASSREGNTLYF
clone_1371_aK0	clonotype434aKO	1	TRB:CASSPGWEQYF
clone_1372_aK0	clonotype435aKO	1	TRB:CASSYQDTQYF
clone_1373_aK0	clonotype436aKO	1	TRB:CASSLDREQYF
clone_1374_aK0	clonotype437aKO	1	TRB:CASSLAGEVFF
clone_1375_aK0	clonotype438aKO	1	TRB:CASSLVGTLYF
clone_1376_aK0	clonotype439aKO	1	TRB:CASSFLTEQFF
clone_1377_aK0	clonotype440aKO	1	TRB:CASSLHAEQFF
clone_1378_aK0	clonotype441aKO	1	TRB:CASTRGNYAEQFF
clone_1379_aK0	clonotype442aKO	1	TRB:CASRGQANSDYTF
clone_1380_aK0	clonotype443aKO	1	TRB:CASRGTGQDTQYF
clone_1381_aK0	clonotype444aKO	1	TRB:CASSTGGGDTQYF
clone_1382_aK0	clonotype445aKO	1	TRB:CASSDWGFYEQYF
clone_1383_aK0	clonotype446aKO	1	TRB:CASSDKNTGQLYF
clone_1384_aK0	clonotype447aKO	1	TRB:CASSDRGAERLFF
clone_1385_aK0	clonotype449aKO	1	TRB:CASSDSGRHTQYF
clone_1386_aK0	clonotype451aKO	1	TRB:CASSGPNYAEQFF
clone_1387_aK0	clonotype452aKO	1	TRB:CASGDGNYAEQFF
clone_1388_aK0	clonotype454aKO	1	TRB:CASGEGGADTQYF
clone_1389_aK0	clonotype455aKO	1	TRB:CASGDDWGDTQYF
clone_1390_aK0	clonotype456aKO	1	TRB:CASGVRANSDYTF
clone_1391_aK0	clonotype457aKO	1	TRB:CASGVRANSDYTF
clone_1392_aK0	clonotype458aKO	1	TRB:CASGVRANSDYTF
clone_1393_aK0	clonotype459aKO	1	TRB:CASGVRANSDYTF
clone_1394_aK0	clonotype460aKO	1	TRB:CASSVTPSQNTLYF
clone_1395_aK0	clonotype461aKO	1	TRB:CASRHWGSAETLYF
clone_1396_aK0	clonotype462aKO	1	TRB:CASRRDRTIYEQYF
clone_1397_aK0	clonotype464aKO	1	TRB:CASSTSGNYAEQFF
clone_1398_aK0	clonotype465aKO	1	TRB:CASSPQGANTEVFF
clone_1399_aK0	clonotype466aKO	1	TRB:CASSLRDRDAEQFF
clone_1400_aK0	clonotype467aKO	1	TRB:CASSEQGGDTEVFF
clone_1401_aK0	clonotype468aKO	1	TRB:CASSEGAGSDTQYF
clone_1402_aK0	clonotype469aKO	1	TRB:CASSDHYSGNTLYF
clone_1403_aK0	clonotype470aKO	1	TRB:CASSDGTGNSDYTF
clone_1404_aK0	clonotype471aKO	1	TRB:CASSDGTGNSDYTF
clone_1405_aK0	clonotype472aKO	1	TRB:CASSDTDSGNTLYF
clone_1406_aK0	clonotype473aKO	1	TRB:CASSDPGLGESQYF
clone_1407_aK0	clonotype474aKO	1	TRB:CASSDLGGAREQYF
clone_1408_aK0	clonotype475aKO	1	TRB:CASSDAGQNSDYTF
clone_1409_aK0	clonotype476aKO	1	TRB:CASSAWGRDAEQFF
clone_1410_aK0	clonotype477aKO	1	TRB:CASSGQGTGNTLYF
clone_1411_aK0	clonotype478aKO	1	TRB:CASSQVGHEVFF
clone_1412_aK0	clonotype479aKO	1	TRB:CASSYRGREQYF
clone_1413_aK0	clonotype480aKO	1	TRB:CASSWNFYEQYF
clone_1414_aK0	clonotype481aKO	1	TRB:CASSQDSTEVFF
clone_1415_aK0	clonotype482aKO	1	TRB:CGASDWGGQNTLYF
clone_1416_aK0	clonotype483aKO	1	TRB:CGAKTGTSNERLFF
clone_1417_aK0	clonotype484aKO	1	TRB:CGARRDWGAGEQYF
clone_1418_aK0	clonotype485aKO	1	TRB:CGAREGGSGNTLYF
clone_1419_aK0	clonotype486aKO	1	TRB:CGARDRGHHERLFF
clone_1420_aK0	clonotype487aKO	1	TRB:CGARDLTGSERLFF
clone_1421_aK0	clonotype488aKO	1	TRB:CGARDWGPNTEVFF
clone_1422_aK0	clonotype489aKO	1	TRB:CAWTPTGGVYEQYF;TRA:CAYTNTGKLTF
clone_1423_aK0	clonotype490aKO	1	TRB:CASGDYYAEQFF;TRA:CAADYSNNRLTL
clone_1424_aK0	clonotype491aKO	1	TRB:CASSQTSQNTLYF;TRA:CAPDTNAYKVIF
clone_1425_aK0	clonotype492aKO	1	TRB:CASSQDAGGEQYF;TRA:CAVSANRIFF
clone_1426_aK0	clonotype493aKO	1	TRB:CASGETGNTEVFF;TRA:CALGESSGSWQLIF;TRA:CAMDSAGNKLTF
clone_1427_aK0	clonotype494aKO	1	TRB:CASSRDYYEQYF;TRA:CAIGSGYNKLTF;TRA:CAPHQGGRALIF
clone_1428_aK0	clonotype495aKO	1	TRB:CASSYTRGEQYF;TRA:CAFNNYAQGLTF
clone_1429_aK0	clonotype496aKO	1	TRB:CGARPRDRSYEQYF;TRA:CAVSGGNNKLTF
clone_1430_aK0	clonotype497aKO	1	TRB:CASSFDNPNSDYTF;TRB:CASSPGQADTQYF;TRA:CAARPGSNNRIFF
clone_1431_aK0	clonotype498aKO	1	TRB:CAWSPGHLNERLFF;TRA:CAVDYANKMIF
clone_1432_aK0	clonotype499aKO	1	TRB:CAWSLMVANSDYTF;TRA:CAIGRNSNNRIFF
clone_1433_aK0	clonotype500aKO	1	TRB:CASSDSRHQAPLF;TRA:CAAITGNTGKLIF
clone_1434_aK0	clonotype501aKO	1	TRB:CASSRQGANERLFF;TRA:CAIESGSFNKLTF
clone_1435_aK0	clonotype503aKO	1	TRB:CSSREGQGYAEQFF;TRA:CAADSGGNYKPTF
clone_1436_aK0	clonotype505aKO	1	TRB:CASSQDWVYEQYF;TRA:CALEPGGSNAKLTF
clone_1437_aK0	clonotype506aKO	1	TRB:CAWSRDNANSDYTF;TRA:CAPINDSGYNKLTF
clone_1438_aK0	clonotype507aKO	1	TRB:CASSFGDEQYF;TRA:CAVPNYAQGLTF
clone_1439_aK0	clonotype508aKO	1	TRB:CASRQNSGNTLYF;TRA:CADMATGGNNKLTF
clone_1440_aK0	clonotype510aKO	1	TRB:CASSDNIAETLYF;TRA:CAAELTGNTGKLIF
clone_1441_aK0	clonotype511aKO	1	TRB:CASRNRDRGDEQYF;TRA:CAAEGWSNYNVLYF;TRA:CAIRYDTNAYKVIF
clone_1442_aK0	clonotype512aKO	1	TRB:CASSEGTGGTEVFF;TRA:CALDLSSNTNKVVF
clone_1443_aK0	clonotype513aKO	1	TRB:CASSDGGKNTEVFF;TRA:CAVSNYAQGLTF
clone_1444_aK0	clonotype514aKO	1	TRB:CASSARDNYAEQFF;TRA:CAVNTNTGKLTF
clone_1445_aK0	clonotype515aKO	1	TRB:CASSPMGERLFF;TRA:CAVSASNNRIFF
clone_1446_aK0	clonotype516aKO	1	TRB:CASSYRDTEVFF;TRA:CAVSSYAQGLTF
clone_1447_aK0	clonotype517aKO	1	TRB:CASSLLTIDTQYF;TRB:CGARDWGGAETLYF;TRA:CALERDTGYQNFYF
clone_1448_aK0	clonotype518aKO	1	TRB:CASSDIGGQDTQYF;TRB:CASSFGRGEQYF;TRA:CAAGIYGSSGNKLIF;TRA:CVVGDRGSALGRLHF
clone_1449_aK0	clonotype519aKO	1	TRB:CASGQGQNTLYF;TRA:CAMSEQGGRALIF
clone_1450_aK0	clonotype520aKO	1	TRB:CAWSLGQTNTEVFF;TRA:CALSHQGGRALIF
clone_1451_aK0	clonotype521aKO	1	TRB:CAWSLGQSQNTLYF;TRA:CAVRAANTGKLTF
clone_1452_aK0	clonotype522aKO	1	TRB:CAWSSGQGNSPLYF;TRA:CALRGSALGRLHF
clone_1453_aK0	clonotype523aKO	1	TRB:CASSPLKYEQYF;TRA:CAVTGTGSNRLTF
clone_1454_aK0	clonotype524aKO	1	TRB:CGARGHSYNSPLYF;TRA:CAVSIPGNYKYVF
clone_1455_aK0	clonotype525aKO	1	TRB:CACRDWGVAETLYF;TRA:CAVTPTGNTGKLIF
clone_1456_aK0	clonotype527aKO	1	TRB:CAWSLQGVSYEQYF;TRA:CALSPNSAGNKLTF
clone_1457_aK0	clonotype528aKO	1	TRB:CAWMGQVSNERLFF;TRA:CAASRVGDNSKLIW
clone_1458_aK0	clonotype529aKO	1	TRB:CASSLDAEQFF;TRA:CAMRDQGGGYKVVF
clone_1459_aK0	clonotype530aKO	1	TRB:CASSDMGPSDYTF;TRA:CAVSASSGSWQLIF
clone_1460_aK0	clonotype531aKO	1	TRB:CASSDRRGREQYF;TRA:CAVYNAGAKLTF
clone_1461_aK0	clonotype532aKO	1	TRB:CASSDLGGNEQYF;TRA:CAALPGTGSNRLTF
clone_1462_aK0	clonotype535aKO	1	TRB:CASSDRDKNSDYTF;TRA:CAPDMGYKLTF
clone_1463_aK0	clonotype536aKO	1	TRB:CASSDLDNNERLFF;TRA:CALITGNTGKLIF
clone_1464_aK0	clonotype537aKO	1	TRB:CASSPYNSPLYF;TRA:CAVSASSNNRIFF
clone_1465_aK0	clonotype538aKO	1	TRB:CASSSYQDTQYF;TRA:CAVSAQTNTGKLTF
clone_1466_aK0	clonotype539aKO	1	TRB:CASSLQANSDYTF;TRB:CASSSSQNTLYF;TRA:CAVSANQGGRALIF
clone_1467_aK0	clonotype540aKO	1	TRB:CASGSTGGSYEQYF;TRB:CAWSPGTGGYEQYF;TRA:CAARDYSNNRLTL;TRA:CAASGGNMGYKLTF
clone_1468_aK0	clonotype541aKO	1	TRB:CAWSPGLGGLEQYF;TRA:CALGFASALTF
clone_1469_aK0	clonotype542aKO	1	TRB:CAWSLARANTEVFF;TRA:CATEKITGNTGKLIF
clone_1470_aK0	clonotype543aKO	1	TRB:CASSVPGQSNSDYTF;TRB:CAWSLGGAPAEQFF;TRA:CAASETTASLGKLQF
clone_1471_aK0	clonotype544aKO	1	TRB:CAWSLWGGQDTQYF;TRA:CAVSASTNAYKVIF
clone_1472_aK0	clonotype545aKO	1	TRB:CASSGQRDERLFF;TRA:CALSAHWGGNYKPTF
clone_1473_aK0	clonotype546aKO	1	TRB:CASSGTGVFEQYF;TRA:CAVSAPGNTGKLIF
clone_1474_aK0	clonotype547aKO	1	TRB:CASGDTPNSDYTF;TRA:CALGSSNTNKVVF
clone_1475_aK0	clonotype548aKO	1	TRB:CASGDAQNERLFF;TRA:CAASTTGYQNFYF;TRA:CALSELIQTGFASALTF
clone_1476_aK0	clonotype549aKO	1	TRB:CASSPLGNYAEQFF;TRA:CATEGTNSAGNKLTF
clone_1477_aK0	clonotype550aKO	1	TRB:CASSRGNSDYTF;TRA:CAVSMENYNQGKLIF
clone_1478_aK0	clonotype552aKO	1	TRB:CGARDGGNQNTLYF;TRA:CALSENYAQGLTF
clone_1479_aK0	clonotype554aKO	1	TRB:CASSIGQGAKVFF;TRB:CASSRDPTEVFF;TRA:CALSDDTNAYKVIF
clone_1480_aK0	clonotype555aKO	1	TRB:CASSLDNQAPLF;TRA:CAASTGGLSGKLTF
clone_1481_aK0	clonotype556aKO	1	TRB:CASRGGTTGQLYF;TRA:CAASVGSAGNKLTF
clone_1482_aK0	clonotype557aKO	1	TRB:CAWTGQGGAETLYF;TRA:CALSARYSNNRLTL
clone_1483_aK0	clonotype558aKO	1	TRB:CAWRTGGMDAEQFF;TRB:CSSTPGHANTEVFF;TRA:CALRGGSNAKLTF
clone_1484_aK0	clonotype560aKO	1	TRB:CASSLENTLYF;TRA:CALGDGNYQLIW
clone_1485_aK0	clonotype561aKO	1	TRB:CASSDWGGGTQYF;TRA:CALGIGDYANKMIF
clone_1486_aK0	clonotype562aKO	1	TRB:CASSGQGDSDYTF;TRA:CASTHTNAYKVIF
clone_1487_aK0	clonotype563aKO	1	TRB:CGARDWGNYAEQFF;TRA:CALKSNTGYQNFYF
clone_1488_aK0	clonotype564aKO	1	TRB:CGARGQNNYAEQFF;TRA:CALKDTNAYKVIF
clone_1489_aK0	clonotype565aKO	1	TRB:CASSQDWGDEQYF;TRA:CALGDHSNNRIFF
clone_1490_aK0	clonotype566aKO	1	TRB:CASSRDQGEQYF;TRA:CALSDRYNQGKLIF
clone_1491_aK0	clonotype567aKO	1	TRB:CASTPGSGNTLYF;TRA:CVVGDRGSALGRLHF
clone_1492_aK0	clonotype568aKO	1	TRB:CASSGGANTEVFF;TRA:CALGNYNQGKLIF
clone_1493_aK0	clonotype570aKO	1	TRB:CAWNRQGANSDYTF;TRA:CALGDQGGNYKPTF
clone_1494_aK0	clonotype571aKO	1	TRB:CAWSLGTGSYEQYF;TRA:CALRMATGGNNKLTF
clone_1495_aK0	clonotype572aKO	1	TRB:CASSRGDTQYF;TRA:CALSDWGSALGRLHF
clone_1496_aK0	clonotype573aKO	1	TRB:CASSLGGNQDTQYF;TRA:CALGDQTNTGKLTF
clone_1497_aK0	clonotype574aKO	1	TRB:CASSQGQGLGGGYNYAEQFF;TRB:CASSQVGGDTQYF;TRA:CALGETTASLGKLQF
clone_1498_aK0	clonotype575aKO	1	TRB:CASSRDWGYEQYF;TRA:CAAGEDANKMIF
clone_1499_aK0	clonotype576aKO	1	TRB:CASSLGREQYF;TRA:CALSAVYGSSGNKLIF
clone_1500_aK0	clonotype578aKO	1	TRB:CAWSPGTGPYEQYF;TRA:CAASSNNRIFF
clone_1501_aK0	clonotype579aKO	1	TRB:CAWSLGGSNERLFF;TRA:CAASEGNYQLIW
clone_1502_aK0	clonotype580aKO	1	TRB:CAWGTGGAQNTLYF;TRA:CAMRDVNVGDNSKLIW
clone_1503_aK0	clonotype581aKO	1	TRB:CASSGGTEQFF;TRA:CAMREPTSGGNYKPTF
clone_1504_aK0	clonotype582aKO	1	TRB:CASKDRQFYEQYF;TRA:CALGDRGGSALGRLHF
clone_1505_aK0	clonotype583aKO	1	TRB:CASSPTGNTLYF;TRA:CAAGSGGNNKLTF
clone_1506_aK0	clonotype585aKO	1	TRB:CAWSRTVSNERLFF;TRA:CAAGGVNTGNYKYVF
clone_1507_aK0	clonotype586aKO	1	TRB:CASSQEFGEQYF;TRA:CAASRGNYAQGLTF
clone_1508_aK0	clonotype587aKO	1	TRB:CAWSPRDWGDEQYF;TRA:CAASDSTGYQNFYF
clone_1509_aK0	clonotype588aKO	1	TRB:CASSLLNTLYF;TRA:CAASASSALGRLHF
clone_1510_aK0	clonotype589aKO	1	TRB:CAWSPGLGVYEQYF;TRA:CAASRGSSNTNKVVF
clone_1511_aK0	clonotype590aKO	1	TRB:CAWSRDRSGNTLYF;TRA:CALSPITGNTGKLIF
clone_1512_aK0	clonotype591aKO	1	TRA:CAARDTNAYKVIF
clone_1513_aK0	clonotype592aKO	1	TRA:CAVSLNNNNAPRF
clone_1514_aK0	clonotype593aKO	1	TRA:CAVSMTNNNAPRF
clone_1515_aK0	clonotype594aKO	1	TRA:CAVSLTGGYKVVF
clone_1516_aK0	clonotype596aKO	1	TRA:CALSDPSNNRIFF
clone_1517_aK0	clonotype598aKO	1	TRB:CASSPGSAETLYF
clone_1518_aK0	clonotype599aKO	1	TRB:CASSLRRYAEQFF
clone_1519_aK0	clonotype600aKO	1	TRB:CASSLRGNSDYTF
clone_1520_aK0	clonotype601aKO	1	TRB:CASRPGGANTEVFF
clone_1521_aK0	clonotype602aKO	1	TRB:CASRPGGANTEVFF
clone_1522_aK0	clonotype603aKO	1	TRB:CASRPGGANTEVFF
clone_1523_aK0	clonotype604aKO	1	TRB:CASSQEGNQDTQYF
clone_1524_aK0	clonotype605aKO	1	TRB:CASSQDRVYAEQFF
clone_1525_aK0	clonotype606aKO	1	TRB:CASSQENGGYEQYF
clone_1526_aK0	clonotype607aKO	1	TRB:CASSQEGNQDTQYF
clone_1527_aK0	clonotype608aKO	1	TRB:CASSQEGGGNTLYF
clone_1528_aK0	clonotype609aKO	1	TRB:CASSQDGKNTEVFF
clone_1529_aK0	clonotype610aKO	1	TRB:CASSQARVNTEVFF
clone_1530_aK0	clonotype611aKO	1	TRB:CASSQGGYNSPLYF
clone_1531_aK0	clonotype612aKO	1	TRB:CASSQGGSGNTLYF
clone_1532_aK0	clonotype613aKO	1	TRB:CASSPDRGGNTLYF
clone_1533_aK0	clonotype614aKO	1	TRB:CASSPHNNQDTQYF
clone_1534_aK0	clonotype615aKO	1	TRB:CASSPRQAGNTLYF
clone_1535_aK0	clonotype616aKO	1	TRB:CASSRWGSAETLYF
clone_1536_aK0	clonotype617aKO	1	TRB:CASSSRLGTYEQYF
clone_1537_aK0	clonotype618aKO	1	TRA:CAVSSSNTNKVVF
clone_1538_aK0	clonotype619aKO	1	TRA:CAVASSGSWQLIF
clone_1539_aK0	clonotype620aKO	1	TRB:CAWRPPPGTENTLYF
clone_1540_aK0	clonotype621aKO	1	TRB:CAWSPLGQGVERLFF
clone_1541_aK0	clonotype622aKO	1	TRB:CAWSPGLGVSYEQYF
clone_1542_aK0	clonotype623aKO	1	TRB:CAWSRLQVSNERLFF
clone_1543_aK0	clonotype624aKO	1	TRB:CAWSRLQVSNERLFF
clone_1544_aK0	clonotype625aKO	1	TRB:CAWSRLQVSNERLFF
clone_1545_aK0	clonotype626aKO	1	TRB:CAWSLGGGHAETLYF
clone_1546_aK0	clonotype627aKO	1	TRB:CAWSLGWGGAETLYF
clone_1547_aK0	clonotype628aKO	1	TRB:CAWSLAGRVYAEQFF
clone_1548_aK0	clonotype629aKO	1	TRB:CASSYGTETLYF
clone_1549_aK0	clonotype630aKO	1	TRB:CASSYTDAEQFF
clone_1550_aK0	clonotype631aKO	1	TRB:CASSSDGNTLYF
clone_1551_aK0	clonotype632aKO	1	TRB:CASSLRRYEQYF
clone_1552_aK0	clonotype633aKO	1	TRB:CASSLEKNTLYF
clone_1553_aK0	clonotype634aKO	1	TRB:CASSLDDQAPLF
clone_1554_aK0	clonotype635aKO	1	TRB:CASSLGKDTQYF
clone_1555_aK0	clonotype636aKO	1	TRB:CASSLGGNTLYF
clone_1556_aK0	clonotype637aKO	1	TRB:CASSLEQDTQYF
clone_1557_aK0	clonotype638aKO	1	TRB:CASRTVSYEQYF
clone_1558_aK0	clonotype639aKO	1	TRB:CASRTGTGGRVFF
clone_1559_aK0	clonotype640aKO	1	TRB:CASRTGTGGRVFF
clone_1560_aK0	clonotype641aKO	1	TRB:CASSQGGREQYF
clone_1561_aK0	clonotype642aKO	1	TRB:CASSLKNTEVFF
clone_1562_aK0	clonotype643aKO	1	TRB:CASSLSAETLYF
clone_1563_aK0	clonotype644aKO	1	TRB:CASSLPGSDYTF
clone_1564_aK0	clonotype645aKO	1	TRB:CASSLSQYEQYF
clone_1565_aK0	clonotype649aKO	1	TRB:CASSLNSYEQYF
clone_1566_aK0	clonotype650aKO	1	TRB:CASSLSAETLYF
clone_1567_aK0	clonotype651aKO	1	TRB:CASRQGRGQNTLYF
clone_1568_aK0	clonotype652aKO	1	TRB:CASRLGGGQDTQYF
clone_1569_aK0	clonotype653aKO	1	TRB:CASSRQGSNERLFF
clone_1570_aK0	clonotype654aKO	1	TRB:CASRDRATNTEVFF
clone_1571_aK0	clonotype655aKO	1	TRB:CASSPGQNYAEQFF
clone_1572_aK0	clonotype657aKO	1	TRB:CASSPGQNYAEQFF
clone_1573_aK0	clonotype658aKO	1	TRB:CASSERDNNERLFF
clone_1574_aK0	clonotype659aKO	1	TRB:CASSEMGNYAEQFF
clone_1575_aK0	clonotype660aKO	1	TRB:CASSDRGRYTEVFF
clone_1576_aK0	clonotype661aKO	1	TRB:CASSDWGSAETLYF
clone_1577_aK0	clonotype662aKO	1	TRB:CASSEEGSNERLFF
clone_1578_aK0	clonotype663aKO	1	TRB:CASSDRGLGNTLYF
clone_1579_aK0	clonotype664aKO	1	TRB:CASSDGGPNTEVFF
clone_1580_aK0	clonotype665aKO	1	TRB:CASSGQGYNSPLYF
clone_1581_aK0	clonotype666aKO	1	TRB:CASSGTGGKDTQYF
clone_1582_aK0	clonotype667aKO	1	TRB:CASSVRDSGNTLYF
clone_1583_aK0	clonotype668aKO	1	TRB:CASSSGGYQDTQYF
clone_1584_aK0	clonotype669aKO	1	TRB:CASGGLGGIYEQYF
clone_1585_aK0	clonotype670aKO	1	TRB:CASGDNWVQNTLYF
clone_1586_aK0	clonotype671aKO	1	TRB:CASGDDRGRDTQYF
clone_1587_aK0	clonotype672aKO	1	TRB:CASGEDNSNERLFF
clone_1588_aK0	clonotype673aKO	1	TRB:CASGDRLGGETLYF
clone_1589_aK0	clonotype674aKO	1	TRB:CASGDGGTGNTLYF
clone_1590_aK0	clonotype675aKO	1	TRB:CASGDGLLWAEQFF
clone_1591_aK0	clonotype676aKO	1	TRB:CASGGLGSAETLYF
clone_1592_aK0	clonotype677aKO	1	TRB:CASRRLGGNYAEQFF
clone_1593_aK0	clonotype678aKO	1	TRB:CASSDRPNSGNTLYF
clone_1594_aK0	clonotype679aKO	1	TRB:CASSGGGAPGNTLYF
clone_1595_aK0	clonotype680aKO	1	TRB:CASSPGTISNERLFF
clone_1596_aK0	clonotype681aKO	1	TRB:CASSELGSSSYEQYF
clone_1597_aK0	clonotype683aKO	1	TRB:CASSERGQSSYEQYF
clone_1598_aK0	clonotype684aKO	1	TRB:CASSDPGQGGQAPLF
clone_1599_aK0	clonotype685aKO	1	TRB:CASSDAAENTGQLYF
clone_1600_aK0	clonotype686aKO	1	TRB:CASSDGTEDTGQLYF
clone_1601_aK0	clonotype687aKO	1	TRB:CASSDGTGCQDTQYF
clone_1602_aK0	clonotype688aKO	1	TRB:CASSDGGRDAETLYF
clone_1603_aK0	clonotype689aKO	1	TRB:CASSDVGGVGAEQFF
clone_1604_aK0	clonotype690aKO	1	TRB:CASSDVGASSYEQYF
clone_1605_aK0	clonotype691aKO	1	TRB:CASSAGTGNNQAPLF
clone_1606_aK0	clonotype692aKO	1	TRB:CASSQQTNSDYTF
clone_1607_aK0	clonotype694aKO	1	TRB:CASSYRGNSPLYF
clone_1608_aK0	clonotype695aKO	1	TRB:CASSYGGGNTLYF
clone_1609_aK0	clonotype697aKO	1	TRB:CASSYWGAETLYF
clone_1610_aK0	clonotype698aKO	1	TRB:CASSWDCSYEQYF
clone_1611_aK0	clonotype699aKO	1	TRB:CASSWDCSYEQYF
clone_1612_aK0	clonotype700aKO	1	TRB:CASSLTGGYEQYF
clone_1613_aK0	clonotype701aKO	1	TRB:CASSLTGGREQYF
clone_1614_aK0	clonotype702aKO	1	TRB:CASSFDWGYEQYF
clone_1615_aK0	clonotype703aKO	1	TRB:CASRDRRGNTLYF
clone_1616_aK0	clonotype704aKO	1	TRB:CSSSQSGTEVFF
clone_1617_aK0	clonotype705aKO	1	TRB:CTCSARGEQYF
clone_1618_aK0	clonotype706aKO	1	TRB:CTCSVGDTQYF
clone_1619_aK0	clonotype707aKO	1	TRB:CASSQENNQDTQYF;TRA:CAASNYGNEKITF;TRA:CILRGGNNKLTF
clone_1620_aK0	clonotype708aKO	1	TRB:CASSQETTNSDYTF;TRA:CAQSGTYQRF
clone_1621_aK0	clonotype709aKO	1	TRB:CASSDSGLGYEQYF;TRA:CARDGNEKITF
clone_1622_aK0	clonotype710aKO	1	TRB:CGARGQGGSAETLYF;TRA:CILSSNTNKVVF
clone_1623_aK0	clonotype711aKO	1	TRB:CASSLLGGEQYF;TRA:CATSNNNNAPRF;TRA:CAYQGGRALIF
clone_1624_aK0	clonotype712aKO	1	TRB:CASSQGGGAAEQFF;TRA:CAAGSNTNKVVF;TRA:CAMREANYGNEKITF
clone_1625_aK0	clonotype713aKO	1	TRB:CASSYWGGANEQYF;TRB:CAWSPDWGNYAEQFF;TRA:CAERGTQVVGQLTF;TRA:CAMGNSGTYQRF
clone_1626_aK0	clonotype714aKO	1	TRB:CASSSSAETLYF;TRA:CAIGSGYNKLTF
clone_1627_aK0	clonotype715aKO	1	TRB:CASRNGGNYAEQFF;TRA:CALDTGYQNFYF
clone_1628_aK0	clonotype716aKO	1	TRB:CASSDRAGGVNTQYF;TRA:CAAAYGNEKITF
clone_1629_aK0	clonotype717aKO	1	TRB:CASSPRQSYEQYF;TRA:CAIDTNTGKLTF
clone_1630_aK0	clonotype718aKO	1	TRB:CASSSQKNTEVFF;TRA:CARGAYKVIF
clone_1631_aK0	clonotype719aKO	1	TRB:CASVGGPGTGQLYF;TRA:CAAASSGSWQLIF
clone_1632_aK0	clonotype720aKO	1	TRB:CAWSPGQGIAETLYF;TRA:CAAEYSGSWQLIF
clone_1633_aK0	clonotype721aKO	1	TRB:CASSFTGREQYF;TRA:CAFLNNAGAKLTF
clone_1634_aK0	clonotype722aKO	1	TRB:CASSGQGGSAETLYF;TRA:CALRDMGYKLTF;TRA:CAVSGGYKVVF
clone_1635_aK0	clonotype724aKO	1	TRB:CASSQASSGNTLYF;TRB:CASSQTSSQNTLYF;TRA:CAAEGSSGSWQLIF
clone_1636_aK0	clonotype725aKO	1	TRB:CASSQGGYTGQLYF;TRA:CAMNYGSSGNKLIF
clone_1637_aK0	clonotype726aKO	1	TRB:CAWSLAQGANTEVFF;TRA:CAANNAGAKLTF
clone_1638_aK0	clonotype727aKO	1	TRB:CASSLGGDTQYF;TRA:CAVSNYANKMIF
clone_1639_aK0	clonotype728aKO	1	TRB:CASRTGSSDYTF;TRA:CATSGGNYKPTF
clone_1640_aK0	clonotype729aKO	1	TRB:CASTGGRTGNTLYF;TRA:CALSKGGSALGRLHF;TRA:CAPGTGGYKVVF
clone_1641_aK0	clonotype730aKO	1	TRB:CASSPDNSGNTLYF;TRA:CAMERVYGNEKITF
clone_1642_aK0	clonotype731aKO	1	TRB:CASSEQDRDTEVFF;TRA:CAVSSNTNKVVF
clone_1643_aK0	clonotype732aKO	1	TRB:CASSEGGGAGTQYF;TRA:CAASSNAYKVIF
clone_1644_aK0	clonotype733aKO	1	TRB:CASSERDSSYEQYF;TRA:CAAEFMSNYNVLYF
clone_1645_aK0	clonotype734aKO	1	TRB:CASSDAGASAETLYF;TRA:CATDETGFASALTF
clone_1646_aK0	clonotype735aKO	1	TRB:CASSGGLGSSYEQYF;TRA:CAARWNYAQGLTF;TRA:CATGTGGYKVVF
clone_1647_aK0	clonotype736aKO	1	TRB:CASSQELDTEVFF;TRA:CALELNTNTGKLTF
clone_1648_aK0	clonotype737aKO	1	TRB:CASSQGPNTEVFF;TRA:CALNTGYQNFYF
clone_1649_aK0	clonotype738aKO	1	TRB:CASSHGNTGQLYF;TRA:CALSDSNTNKVVF
clone_1650_aK0	clonotype739aKO	1	TRB:CASSQDWGDYEQYF;TRA:CAVRDHNYNQGKLIF
clone_1651_aK0	clonotype740aKO	1	TRB:CAWSLRTGLSYEQYF;TRA:CAVRDRGSALGRLHF
clone_1652_aK0	clonotype741aKO	1	TRB:CASSRDRVEQYF;TRA:CAANDSGYNKLTF
clone_1653_aK0	clonotype742aKO	1	TRB:CASSSDRQAPLF;TRA:CAARGSNYNVLYF
clone_1654_aK0	clonotype743aKO	1	TRB:CASSLDLQEVFF;TRA:CAVRSGTYQRF
clone_1655_aK0	clonotype744aKO	1	TRB:CASSQGDTEVFF;TRA:CAASRGGNYKYVF
clone_1656_aK0	clonotype745aKO	1	TRB:CASSPGPDTGQLYF;TRA:CALSETNTGKLTF
clone_1657_aK0	clonotype746aKO	1	TRB:CASRDISYNSPLYF;TRA:CAVSGGSNYKLTF
clone_1658_aK0	clonotype748aKO	1	TRB:CASSLKANSDYTF;TRB:CASSSHSQNTLYF;TRA:CATDAGGNYKPTF
clone_1659_aK0	clonotype749aKO	1	TRB:CGARDHTASAETLYF;TRA:CVLVDNYAQGLTF
clone_1660_aK0	clonotype750aKO	1	TRB:CGARVPGRANTEVFF;TRA:CAARNNAGAKLTF
clone_1661_aK0	clonotype751aKO	1	TRB:CASSQDVGNSDYTF;TRA:CAVSIGNYAQGLTF
clone_1662_aK0	clonotype754aKO	1	TRB:CASSINQDTQYF;TRB:CAWSLEGQAGNTLYF;TRA:CAVSMRNSNNRIFF
clone_1663_aK0	clonotype755aKO	1	TRB:CASSPSSYEQYF;TRA:CALISNTNKVVF
clone_1664_aK0	clonotype756aKO	1	TRB:CASSAWGVEQYF;TRB:CASSPLQGANTGQLYF;TRA:CAVRTTGNTGKLIF
clone_1665_aK0	clonotype757aKO	1	TRB:CASSSSQNTLYF;TRA:CAVRLSGSFNKLTF
clone_1666_aK0	clonotype758aKO	1	TRB:CASSRTGSTEVFF;TRA:CALDLIASSSFSKLVF
clone_1667_aK0	clonotype759aKO	1	TRB:CASSWGGYEQYF;TRA:CAVRSSGSWQLIF
clone_1668_aK0	clonotype760aKO	1	TRB:CASRDSSYEQYF;TRA:CALSETASLGKLQF
clone_1669_aK0	clonotype761aKO	1	TRB:CASSLTDSGNTLYF;TRA:CALGNSNNRIFF
clone_1670_aK0	clonotype762aKO	1	TRB:CASSRQGVNERLFF;TRA:CAVTSTSSGQKLVF
clone_1671_aK0	clonotype763aKO	1	TRB:CASSEADSGNTLYF;TRA:CAVRTSGGNYKPTF
clone_1672_aK0	clonotype764aKO	1	TRB:CASSADRGQDTQYF;TRA:CAVSARQGGRALIF
clone_1673_aK0	clonotype765aKO	1	TRB:CASGGQGFGNTLYF;TRA:CAAPASSGSWQLIF
clone_1674_aK0	clonotype766aKO	1	TRB:CATGTGGAGNTLYF;TRA:CALGASNTNKVVF
clone_1675_aK0	clonotype767aKO	1	TRB:CASSDGGRNSYEQYF;TRA:CAVSAITNTGKLTF
clone_1676_aK0	clonotype768aKO	1	TRB:CASSSGANSDYTF;TRA:CALSMYNVLYF
clone_1677_aK0	clonotype769aKO	1	TRB:CASSLGGRAEQFF;TRA:CAVVITGNTGKLIF
clone_1678_aK0	clonotype770aKO	1	TRB:CASADWGYAEQFF;TRA:CAMSPNYNQGKLIF
clone_1679_aK0	clonotype771aKO	1	TRB:CSSSQGTTEVFF;TRA:CAARLNYNQGKLIF
clone_1680_aK0	clonotype772aKO	1	TRB:CASSGGLGTNTGQLYF;TRB:CTCSDRDEQYF;TRA:CALSITGGYKVVF
clone_1681_aK0	clonotype774aKO	1	TRB:CAWSFDGTSNTEVFF;TRA:CASYGSSGNKLIF
clone_1682_aK0	clonotype775aKO	1	TRB:CASSPENTEVFF;TRA:CAAGAEGADRLTF
clone_1683_aK0	clonotype776aKO	1	TRB:CASNAGQNTEVFF;TRA:CVLRSTSSGQKLVF
clone_1684_aK0	clonotype777aKO	1	TRB:CASSLETGQLYF;TRA:CATDAGDTNTGKLTF
clone_1685_aK0	clonotype778aKO	1	TRB:CASSEFGTKDTQYF;TRA:CAVSRSNYNVLYF
clone_1686_aK0	clonotype779aKO	1	TRB:CASREGGANTEVFF;TRB:CASSYRVANSDYTF;TRA:CAVSGTGGYKVVF
clone_1687_aK0	clonotype780aKO	1	TRB:CASGDAADNERLFF;TRA:CAVRANYGNEKITF
clone_1688_aK0	clonotype781aKO	1	TRB:CASSASRTGVYEQYF;TRA:CAASKGTGNTGKLIF
clone_1689_aK0	clonotype782aKO	1	TRB:CASSGAGTGDAEQFF;TRA:CAAVRNNNNAPRF;TRA:CALGDQGKVVF
clone_1690_aK0	clonotype783aKO	1	TRB:CASRLGFQDTQYF;TRA:CALSQTGNTGKLIF
clone_1691_aK0	clonotype784aKO	1	TRB:CASSWGANTEVFF;TRA:CALRSNSAGNKLTF
clone_1692_aK0	clonotype785aKO	1	TRB:CASSQEGHQDTQYF;TRA:CAVSAGGDYANKMIF
clone_1693_aK0	clonotype786aKO	1	TRB:CASSQSTGQNTLYF;TRA:CALVGTGGYKVVF
clone_1694_aK0	clonotype787aKO	1	TRB:CASSLGDWVYEQYF;TRA:CAASPRNYAQGLTF
clone_1695_aK0	clonotype788aKO	1	TRB:CAWRTGGVNTGQLYF;TRA:CAASSTSSGQKLVF
clone_1696_aK0	clonotype789aKO	1	TRB:CAWSPQNSYNSPLYF;TRA:CALVGAGGYKVVF
clone_1697_aK0	clonotype790aKO	1	TRB:CASSLEGREQYF;TRA:CALNVGDNSKLIW
clone_1698_aK0	clonotype792aKO	1	TRB:CASSLGQQAPLF;TRA:CAVSQTGFASALTF
clone_1699_aK0	clonotype793aKO	1	TRB:CASNWGDLYAEQFF;TRA:CALSELGAQGLTF
clone_1700_aK0	clonotype794aKO	1	TRB:CASGDRGGQNTLYF;TRB:CASSIGGATYEQYF;TRA:CAFPRYGNEKITF
clone_1701_aK0	clonotype795aKO	1	TRB:CASSDVGQGVDEQYF;TRA:CALTGTGGYKVVF
clone_1702_aK0	clonotype796aKO	1	TRB:CASSQTGDYEQYF;TRA:CAASTGANTGKLTF
clone_1703_aK0	clonotype797aKO	1	TRB:CASSQEREGEQYF;TRA:CAASRTGSFNKLTF
clone_1704_aK0	clonotype798aKO	1	TRB:CASSLLVGSDYTF;TRA:CAVSARAQVVGQLTF
clone_1705_aK0	clonotype799aKO	1	TRB:CASSQGGRRAEQFF;TRA:CALSENNMGYKLTF
clone_1706_aK0	clonotype801aKO	1	TRB:CASSPQNERLFF;TRA:CALSLLTGNTGKLIF
clone_1707_aK0	clonotype802aKO	1	TRB:CASSLERNTLYF;TRA:CAASGATGGNNKLTF
clone_1708_aK0	clonotype803aKO	1	TRB:CASSFEGTEVFF;TRA:CALGRNMGYKLTF
clone_1709_aK0	clonotype804aKO	1	TRB:CASSETGNTGQLYF;TRA:CVLRANTGANTGKLTF
clone_1710_aK0	clonotype805aKO	1	TRB:CASSDAWGHYEQYF;TRA:CALSEDTNTGKLTF
clone_1711_aK0	clonotype806aKO	1	TRB:CGASGLGGRYAEQFF;TRA:CAVSVWGSALGRLHF
clone_1712_aK0	clonotype807aKO	1	TRB:CASSAGGPSDYTF;TRA:CAMREDTEGADRLTF
clone_1713_aK0	clonotype808aKO	1	TRB:CASSYGTGYEQYF;TRA:CALGPSNMGYKLTF
clone_1714_aK0	clonotype809aKO	1	TRB:CASSPLGGREQYF;TRB:CGAPDWGGDQDTQYF;TRA:CAASADYGSSGNKLIF
clone_1715_aK0	clonotype80aKO	1	TRB:CTCSADWGVSAETLYF;TRA:CAALGGYKVVF;TRA:CAASEGNYAQGLTF
clone_1716_aK0	clonotype810aKO	1	TRB:CASSQEGSQNTLYF;TRA:CAMREGITGNTGKLIF
clone_1717_aK0	clonotype811aKO	1	TRB:CASSRDWGYAEQFF;TRA:CALGDPPASLGKLQF
clone_1718_aK0	clonotype812aKO	1	TRB:CASSDRQGAETLYF;TRA:CAASSNYQLIW
clone_1719_aK0	clonotype813aKO	1	TRB:CASHSASSAETLYF;TRA:CAMREDHYGNEKITF
clone_1720_aK0	clonotype814aKO	1	TRB:CANRDREDTEVFF;TRB:CTCSADLGGRNTGQLYF;TRA:CAMRDASSGSWQLIF
clone_1721_aK0	clonotype816aKO	1	TRB:CASSQDNNQDTQYF;TRA:CAASYSNNRLTL
clone_1722_aK0	clonotype817aKO	1	TRB:CASSQGASSYEQYF;TRA:CAARTGSGGKLTL
clone_1723_aK0	clonotype818aKO	1	TRB:CASSDRKDTQYF;TRA:CALSGHMNTGGLSGKLTF
clone_1724_aK0	clonotype819aKO	1	TRB:CASSQQGTSDYTF;TRA:CAASDYSNNRLTL
clone_1725_aK0	clonotype820aKO	1	TRB:CASSSDSAETLYF;TRA:CAAMSNYNVLYF
clone_1726_aK0	clonotype821aKO	1	TRB:CASSQVLGGNQDTQYF;TRB:CAWSRLQVSNERLFF;TRA:CAASDYSNNRLTL
clone_1727_aK0	clonotype822aKO	1	TRB:CAWSLVGASAETLYF;TRA:CAAKATGNTGKLIF
clone_1728_aK0	clonotype823aKO	1	TRB:CASSFDKYEQYF;TRA:CAAGAKAGGSAKLIF
clone_1729_aK0	clonotype825aKO	1	TRB:CASSLGGGEQYF;TRA:CAASAKGTGSKLSF
clone_1730_aK0	clonotype826aKO	1	TRB:CASSLGGAEQFF;TRA:CAAGESSGGSNYKLTF
clone_1731_aK0	clonotype827aKO	1	TRB:CASSYGGHEQYF;TRA:CAASRGSALGRLHF
clone_1732_aK0	clonotype828aKO	1	TRB:CASSDWDNNQAPLF;TRA:CAASATASLGKLQF
clone_1733_aK0	clonotype829aKO	1	TRB:CASSPRGDSDYTF;TRA:CAASASSGSWQLIF
clone_1734_aK0	clonotype830aKO	1	TRB:CASSQDRSNTEVFF;TRA:CAASDIASSSFSKLVF
clone_1735_aK0	clonotype831aKO	1	TRB:CASSQQGAGNTLYF;TRA:CALSELMNYNQGKLIF
clone_1736_aK0	clonotype832aKO	1	TRB:CASSPQGSAETLYF;TRA:CALSELTGDYANKMIF
clone_1737_aK0	clonotype834aKO	1	TRB:CASSFRNYEQYF;TRA:CALSPDTNAYKVIF
clone_1738_aK0	clonotype835aKO	1	TRA:CAASRGYGNEKITF
clone_1739_aK0	clonotype836aKO	1	TRA:CAARSMSNYNVLYF
clone_1740_aK0	clonotype837aKO	1	TRA:CAQTQVVGQLTF
clone_1741_aK0	clonotype838aKO	1	TRB:CASSPGQGNAEQFF
clone_1742_aK0	clonotype839aKO	1	TRB:CASSLQGLNAEQFF
clone_1743_aK0	clonotype840aKO	1	TRB:CASSSQGFGNTLYF
clone_1744_aK0	clonotype841aKO	1	TRB:CASSLTGGYAEQFF
clone_1745_aK0	clonotype842aKO	1	TRB:CASSLETTNTEVFF
clone_1746_aK0	clonotype843aKO	1	TRB:CASSLGDIQDTQYF
clone_1747_aK0	clonotype844aKO	1	TRB:CASSLSLANTEVFF
clone_1748_aK0	clonotype845aKO	1	TRB:CASSFTPSQNTLYF
clone_1749_aK0	clonotype846aKO	1	TRB:CASSFGQNYAEQFF
clone_1750_aK0	clonotype847aKO	1	TRB:CASSFGQNYAEQFF
clone_1751_aK0	clonotype848aKO	1	TRB:CASSQELGSAETLYF
clone_1752_aK0	clonotype850aKO	1	TRB:CASSQELGSAETLYF
clone_1753_aK0	clonotype851aKO	1	TRB:CASSQEGQGGERLFF
clone_1754_aK0	clonotype852aKO	1	TRB:CASSQDSISNERLFF
clone_1755_aK0	clonotype853aKO	1	TRB:CASSQDHRGYAEQFF
clone_1756_aK0	clonotype854aKO	1	TRB:CASSQEGQGNERLFF
clone_1757_aK0	clonotype855aKO	1	TRB:CASSQEGRGAETLYF
clone_1758_aK0	clonotype856aKO	1	TRB:CASSQEGGDAETLYF
clone_1759_aK0	clonotype857aKO	1	TRB:CASSQDYANTGQLYF
clone_1760_aK0	clonotype858aKO	1	TRB:CASSQDYANTGQLYF
clone_1761_aK0	clonotype859aKO	1	TRB:CASSQGTGGSYEQYF
clone_1762_aK0	clonotype860aKO	1	TRB:CASSQVTGYTGQLYF
clone_1763_aK0	clonotype861aKO	1	TRB:CASSQTGNSGNTLYF
clone_1764_aK0	clonotype862aKO	1	TRB:CASSQGLGAYAEQFF
clone_1765_aK0	clonotype863aKO	1	TRB:CASSPGQVANSDYTF
clone_1766_aK0	clonotype864aKO	1	TRB:CASSPGQVANSDYTF
clone_1767_aK0	clonotype865aKO	1	TRB:CASSRQGNSGNTLYF
clone_1768_aK0	clonotype866aKO	1	TRA:CALNTGGLSGKLTF
clone_1769_aK0	clonotype867aKO	1	TRA:CAVRASSGSWQLIF
clone_1770_aK0	clonotype868aKO	1	TRB:CAWSLMGLGTYAEQFF
clone_1771_aK0	clonotype869aKO	1	TRB:CAWSLMGLGTYAEQFF
clone_1772_aK0	clonotype870aKO	1	TRB:CAWSLLGLGAGAEQFF
clone_1773_aK0	clonotype871aKO	1	TRB:CASRDTPNTEVFF
clone_1774_aK0	clonotype872aKO	1	TRB:CASSQQANTEVFF
clone_1775_aK0	clonotype873aKO	1	TRB:CASSRDNNERLFF
clone_1776_aK0	clonotype874aKO	1	TRB:CASSRDIYAEQFF
clone_1777_aK0	clonotype875aKO	1	TRB:CASSSGDNSPLYF
clone_1778_aK0	clonotype876aKO	1	TRB:CASSSWGDAEQFF
clone_1779_aK0	clonotype877aKO	1	TRB:CASSSSSAETLYF
clone_1780_aK0	clonotype878aKO	1	TRB:CASSWDNNQAPLF
clone_1781_aK0	clonotype879aKO	1	TRB:CASSWGSGNTLYF
clone_1782_aK0	clonotype880aKO	1	TRB:CASSWGSGNTLYF
clone_1783_aK0	clonotype881aKO	1	TRB:CASSLNSFYEQYF
clone_1784_aK0	clonotype882aKO	1	TRB:CASSLKANQAPLF
clone_1785_aK0	clonotype883aKO	1	TRB:CASSLEGNTEVFF
clone_1786_aK0	clonotype884aKO	1	TRB:CASSLEGGYEQYF
clone_1787_aK0	clonotype885aKO	1	TRB:CASSLAGTSTQYF
clone_1788_aK0	clonotype886aKO	1	TRB:CASSLGVNSDYTF
clone_1789_aK0	clonotype888aKO	1	TRB:CASSKLGSQNTLYF
clone_1790_aK0	clonotype889aKO	1	TRB:CASSRDPGKDTQYF
clone_1791_aK0	clonotype890aKO	1	TRB:CASSSHKNTGQLYF
clone_1792_aK0	clonotype891aKO	1	TRB:CASSSAGARDTQYF
clone_1793_aK0	clonotype892aKO	1	TRB:CASSPRDTSYEQYF
clone_1794_aK0	clonotype893aKO	1	TRB:CASSPWGGYEQYF
clone_1795_aK0	clonotype894aKO	1	TRB:CASSWDTYAEQFF
clone_1796_aK0	clonotype895aKO	1	TRB:CASSWDTYAEQFF
clone_1797_aK0	clonotype897aKO	1	TRB:CASSLEGVGEQYF
clone_1798_aK0	clonotype898aKO	1	TRB:CASSLDHIYEQYF
clone_1799_aK0	clonotype899aKO	1	TRB:CASSLGGSYEQYF
clone_1800_aK0	clonotype900aKO	1	TRB:CASSFSTNTEVFF
clone_1801_aK0	clonotype901aKO	1	TRB:CASSLTGGYEQYF
clone_1802_aK0	clonotype902aKO	1	TRB:CASSLGGTYEQYF
clone_1803_aK0	clonotype903aKO	1	TRB:CASSLGWYAEQFF
clone_1804_aK0	clonotype904aKO	1	TRB:CASSLSQGGEVFF
clone_1805_aK0	clonotype905aKO	1	TRB:CASSLSTRSDYTF
clone_1806_aK0	clonotype906aKO	1	TRB:CASSPHAEDTQYF
clone_1807_aK0	clonotype907aKO	1	TRB:CASSRDNQDTQYF
clone_1808_aK0	clonotype908aKO	1	TRB:CASSSGTVYEQYF
clone_1809_aK0	clonotype909aKO	1	TRB:CASSSTLNERLFF
clone_1810_aK0	clonotype90aKO	1	TRB:CASSQDLGGRGQNTLYF;TRB:CTCSAGFYEQYF;TRA:CALRGDTNAYKVIF
clone_1811_aK0	clonotype910aKO	1	TRB:CASSSTLNERLFF
clone_1812_aK0	clonotype911aKO	1	TRB:CASSFGGRAEVFF
clone_1813_aK0	clonotype912aKO	1	TRB:CASSLSLQDTQYF
clone_1814_aK0	clonotype913aKO	1	TRB:CASTHSNYAEQFF
clone_1815_aK0	clonotype914aKO	1	TRB:CASTGQGDTEVFF
clone_1816_aK0	clonotype915aKO	1	TRB:CASTGQGDTEVFF
clone_1817_aK0	clonotype916aKO	1	TRB:CASTGQGDTEVFF
clone_1818_aK0	clonotype917aKO	1	TRB:CASRPGGAYEQYF
clone_1819_aK0	clonotype918aKO	1	TRB:CASSRDWGGEQYF
clone_1820_aK0	clonotype919aKO	1	TRB:CASRDRNQDTQYF
clone_1821_aK0	clonotype920aKO	1	TRB:CASSQQNYAEQFF
clone_1822_aK0	clonotype921aKO	1	TRB:CASSGTGGYEQYF
clone_1823_aK0	clonotype922aKO	1	TRB:CASSSDSYAEQFF
clone_1824_aK0	clonotype923aKO	1	TRB:CASSSGTKDTQYF
clone_1825_aK0	clonotype924aKO	1	TRB:CASSSGTKDTQYF
clone_1826_aK0	clonotype925aKO	1	TRB:CASSSGTKDTQYF
clone_1827_aK0	clonotype926aKO	1	TRB:CASSLGTGDEQYF
clone_1828_aK0	clonotype927aKO	1	TRB:CASSFGGGSDYTF
clone_1829_aK0	clonotype929aKO	1	TRB:CASSFGHPYEQYF
clone_1830_aK0	clonotype930aKO	1	TRB:CASRLGYYAEQFF
clone_1831_aK0	clonotype931aKO	1	TRB:CASSWSGRGQNTLYF
clone_1832_aK0	clonotype932aKO	1	TRB:CASSEGGRAIAEQFF
clone_1833_aK0	clonotype933aKO	1	TRB:CASSDRDGGQDTQYF
clone_1834_aK0	clonotype934aKO	1	TRB:CASSDDWGVLYEQYF
clone_1835_aK0	clonotype935aKO	1	TRB:CASSDAQGANERLFF
clone_1836_aK0	clonotype937aKO	1	TRB:CASSDAGASNSDYTF
clone_1837_aK0	clonotype938aKO	1	TRB:CASSDARLSAETLYF
clone_1838_aK0	clonotype939aKO	1	TRB:CASSAPGLGVDTQYF
clone_1839_aK0	clonotype940aKO	1	TRB:CASSAPGLGVDTQYF
clone_1840_aK0	clonotype941aKO	1	TRB:CASSGTTANTGQLYF
clone_1841_aK0	clonotype942aKO	1	TRB:CASSVPGQGTETLYF
clone_1842_aK0	clonotype943aKO	1	TRB:CASSSGTGVSYEQYF
clone_1843_aK0	clonotype944aKO	1	TRB:CASSDSGTGGYEQYF
clone_1844_aK0	clonotype945aKO	1	TRB:CASGDTGGNYAEQFF
clone_1845_aK0	clonotype946aKO	1	TRB:CASGDQGSSQNTLYF
clone_1846_aK0	clonotype947aKO	1	TRB:CASGESDRGNSDYTF
clone_1847_aK0	clonotype948aKO	1	TRB:CASGDAGNSGNTLYF
clone_1848_aK0	clonotype949aKO	1	TRB:CASGDGAGGRSDYTF
clone_1849_aK0	clonotype950aKO	1	TRB:CASGGPGQNNQAPLF
clone_1850_aK0	clonotype951aKO	1	TRB:CASSDAGGPSAETLYF
clone_1851_aK0	clonotype952aKO	1	TRB:CASSDGTGGTNERLFF
clone_1852_aK0	clonotype953aKO	1	TRB:CASSAAGQFSNERLFF
clone_1853_aK0	clonotype954aKO	1	TRB:CASSAAGQFSNERLFF
clone_1854_aK0	clonotype955aKO	1	TRB:CASSAAGQFSNERLFF
clone_1855_aK0	clonotype958aKO	1	TRB:CASSVPGQGRTGQLYF
clone_1856_aK0	clonotype959aKO	1	TRB:CASSQEPTRAEQFF
clone_1857_aK0	clonotype960aKO	1	TRB:CASSQVVDNYEQYF
clone_1858_aK0	clonotype961aKO	1	TRB:CASRLGASQNTLYF
clone_1859_aK0	clonotype962aKO	1	TRB:CASSKARNTGQLYF
clone_1860_aK0	clonotype963aKO	1	TRB:CASSHGTGQDTQYF
clone_1861_aK0	clonotype964aKO	1	TRB:CASSPGTGGTEVFF
clone_1862_aK0	clonotype965aKO	1	TRB:CASSPTNSQNTLYF
clone_1863_aK0	clonotype966aKO	1	TRB:CASSLRDRGDTQYF
clone_1864_aK0	clonotype967aKO	1	TRB:CASSYAGGNQAPLF
clone_1865_aK0	clonotype968aKO	1	TRB:CASSSPGRYAEQFF
clone_1866_aK0	clonotype969aKO	1	TRB:CASSSPGRYAEQFF
clone_1867_aK0	clonotype970aKO	1	TRB:CASSSGGRWNTLYF
clone_1868_aK0	clonotype971aKO	1	TRB:CASSWRVSNERLFF
clone_1869_aK0	clonotype972aKO	1	TRB:CASSFSGTGLEQYF
clone_1870_aK0	clonotype973aKO	1	TRB:CSSSQEADTEVFF
clone_1871_aK0	clonotype974aKO	1	TRB:CSSSQSAQQAPLF
clone_1872_aK0	clonotype976aKO	1	TRB:CTCSAKNTEVFF
clone_1873_aK0	clonotype977aKO	1	TRB:CTCSGSAETLYF
clone_1874_aK0	clonotype978aKO	1	TRB:CASSSGTGVSNERLFF;TRA:CATDYNQGKLIF
clone_1875_aK0	clonotype979aKO	1	TRB:CASSRDRGNSPLYF;TRA:CAADYANKMIF
clone_1876_aK0	clonotype980aKO	1	TRB:CTCSAERDTLYF;TRA:CAGDSGTYQRF
clone_1877_aK0	clonotype981aKO	1	TRB:CASSLEGAYEQYF;TRA:CAAGDSNNRIFF
clone_1878_aK0	clonotype982aKO	1	TRB:CASSFGANTEVFF;TRA:CAVTEGADRLTF
clone_1879_aK0	clonotype983aKO	1	TRB:CASSLTGGYEQYF;TRA:CAGTGKLIF
clone_1880_aK0	clonotype984aKO	1	TRB:CASSSGGDQDTQYF;TRA:CAEGSAGNKLTF
clone_1881_aK0	clonotype985aKO	1	TRB:CTCSAPEDTQYF;TRA:CAVENNNNAPRF
clone_1882_aK0	clonotype986aKO	1	TRB:CASSSDSYNSPLYF;TRA:CAMENYGNEKITF
clone_1883_aK0	clonotype987aKO	1	TRB:CASSLGNNNQAPLF;TRA:CAAYGGSNAKLTF
clone_1884_aK0	clonotype988aKO	1	TRB:CASSPGTTETLYF;TRA:CAAEGSNTNKVVF
clone_1885_aK0	clonotype989aKO	1	TRB:CASSLGPYQAPLF;TRA:CALEQGTGSKLSF
clone_1886_aK0	clonotype990aKO	1	TRB:CASSPNNYAEQFF;TRA:CALVQGTGSKLSF
clone_1887_aK0	clonotype991aKO	1	TRB:CASSLRGQNTLYF;TRA:CAMEVNSGTYQRF
clone_1888_aK0	clonotype992aKO	1	TRB:CASSLGGQNTLYF;TRA:CALGPSNTNKVVF
clone_1889_aK0	clonotype993aKO	1	TRB:CASSFTGGERLFF;TRA:CAASDNVGDNSKLIW;TRA:CAIESTNAYKVIF
clone_1890_aK0	clonotype994aKO	1	TRB:CASGDGAGGAETLYF;TRA:CAAEAGAGNKLTF
clone_1891_aK0	clonotype995aKO	1	TRB:CASSHTINQDTQYF;TRA:CAIVGTGSNRLTF
clone_1892_aK0	clonotype996aKO	1	TRB:CASSQGQTNTEVFF;TRA:CAAVNSAGNKLTF
clone_1893_aK0	clonotype997aKO	1	TRB:CASSGTGAGNTLYF;TRA:CAMAPSNMGYKLTF
clone_1894_aK0	clonotype998aKO	1	TRB:CASSQTGGSAETLYF;TRA:CAVRNSNNRIFF

## Sheet: aKO2
Tcell_clone_rank	clonotype_id	count	cdr3s_aa
clone_1_seq_1	aKO_aKO_clonotype1	567	TRB:CASSPADWGESQNTLYF;TRA:CAMREGGNYNQGKLIF
clone_2_seq_1	aKO_aKO_clonotype2	310	TRB:CASSQDFQGVGNTLYF;TRA:CAMREGEDNTGKLTF;TRA:CAMREGEDNTGKLTF;TRA:CVLGDLNRIFF
clone_3_seq_1	aKO_aKO_clonotype3	141	TRB:CASSQDFQGAGDTQYF;TRA:CAMRDHDTNAYKVIF;TRA:CAMRDHDTNAYKVIF
clone_4_seq_1	aKO_aKO_clonotype4	138	TRB:CAWSPRNTEVFF;TRA:CAAEARNYAQGLTF;TRA:CALASNTNKVVF
clone_5_seq_1	aKO_aKO_clonotype5	46	TRB:CASSAGGGSPLYF;TRA:CALSEAGGSNAKLTF
clone_6_seq_1	aKO_aKO_clonotype6	45	TRB:CASSLAGSSAETLYF;TRA:CAAEAWSNYNVLYF;TRA:CAVSVTNTGKLTF
clone_7_seq_1	aKO_aKO_clonotype7	44	TRB:CASSQGASAEQFF;TRA:CALIESNNRIFF;TRA:CAVSMRTNTNKVVF
clone_8_seq_1	aKO_aKO_clonotype8	41	TRB:CTCSADGGAYAEQFF;TRA:CALRGGGSNAKLTF
clone_9_seq_1	aKO_aKO_clonotype10	39	TRB:CASGESRGYNSPLYF;TRA:CAVSEHTGGLSGKLTF
clone_10_seq_1	aKO_aKO_clonotype9	36	TRB:CASSSGGTEVFF;TRA:CAVRNTGYQNFYF
clone_11_seq_1	aKO_aKO_clonotype11	31	TRB:CASSFSGSSAETLYF;TRA:CAVSMNYNQGKLIF
clone_12_seq_1	aKO_aKO_clonotype12	24	TRB:CTCSAGGRYAEQFF;TRA:CALSPGGSNAKLTF
clone_13_seq_1	aKO_aKO_clonotype15	21	TRB:CASGADRGLAETLYF;TRA:CAAFSGGSNAKLTF
clone_14_seq_1	aKO_aKO_clonotype13	20	TRB:CASSQDGRTGNTEVFF;TRA:CALGRNNNNAPRF
clone_15_seq_1	aKO_aKO_clonotype14	18	TRB:CASSRDRGEQYF;TRA:CALRGGGRALIF
clone_16_seq_1	aKO_aKO_clonotype17	17	TRB:CASRGLVNEQYF;TRA:CAVRVLNNAGAKLTF
clone_17_seq_1	aKO_aKO_clonotype16	16	TRB:CASSWGRAEQFF
clone_18_seq_1	aKO_aKO_clonotype18	15	TRB:CASRRDWGSTLYF;TRA:CALSRNSNNRIFF
clone_19_seq_1	aKO_aKO_clonotype19	15	TRB:CASGEQGSVAETLYF;TRB:CASGEQGSVAETLYF;TRB:CASSLKVGGREQYF;TRA:CAAEYMSNYNVLYF
clone_20_seq_1	aKO_aKO_clonotype21	13	TRB:CTCSARPNYAEQFF;TRA:CALSEGTGGNNKLTF
clone_21_seq_1	aKO_aKO_clonotype20	12	TRB:CASSQEGRTGNTEVFF;TRA:CALSRNNNNAPRF
clone_22_seq_1	aKO_aKO_clonotype23	12	TRB:CASGDWGSAETLYF;TRA:CAASKQGGSAKLIF
clone_23_seq_1	aKO_aKO_clonotype22	10	TRB:CASSLEYEQYF;TRA:CAASSGGNNKLTF
clone_24_seq_1	aKO_aKO_clonotype24	10	TRB:CASSYRSANSDYTF;TRA:CAIPLSGGSNAKLTF
clone_25_seq_1	aKO_aKO_clonotype25	9	TRB:CASSSGTKDTQYF;TRA:CAIDRDSGGSNAKLTF;TRA:CALGRNSNNRIFF;TRA:CVVASNYAQGLTF
clone_26_seq_1	aKO_aKO_clonotype27	9	TRB:CASSLEYEQYF;TRA:CAASSGGNNKLTF
clone_27_seq_1	aKO_aKO_clonotype26	8	TRB:CASSQDGRTGPTEVFF;TRA:CALSVNNNNAPRF
clone_28_seq_1	aKO_aKO_clonotype28	8	TRB:CASSQEYTEVFF;TRA:CAASDVDYNQGKLIF
clone_29_seq_1	aKO_aKO_clonotype30	8	TRB:CASSQEGGVNQDTQYF;TRA:CAATTNAYKVIF
clone_30_seq_1	aKO_aKO_clonotype32	7	TRB:CASRRGGADTEVFF;TRA:CAVSAEGGRALIF
clone_31_seq_1	aKO_aKO_clonotype35	7	TRB:CTCSAAWQNTEVFF;TRA:CAAEAGGTNAYKVIF
clone_32_seq_1	aKO_aKO_clonotype31	6	TRB:CASSWGRAEQFF;TRA:CAIAHNTGNYKYVF
clone_33_seq_1	aKO_aKO_clonotype33	6	TRB:CASSQEWAANTEVFF
clone_34_seq_1	aKO_aKO_clonotype34	6	TRB:CASSQEGGRDNERLFF;TRA:CAVMASSSFSKLVF;TRA:CAVSTSGGNYKPTF
clone_35_seq_1	aKO_aKO_clonotype36	6	TRB:CASSPGRGSYEQYF;TRA:CAINSAGNKLTF
clone_36_seq_1	aKO_aKO_clonotype38	6	TRB:CASSRQNTEVFF
clone_37_seq_1	aKO_aKO_clonotype41	6	TRB:CASGADSYSGNTLYF;TRA:CAASKAGTYQRF
clone_38_seq_1	aKO_aKO_clonotype29	5	TRB:CASSQEGGRDNERLFF
clone_39_seq_1	aKO_aKO_clonotype39	5	TRB:CASSQEWAANTEVFF;TRA:CAANGSSGNKLIF
clone_40_seq_1	aKO_aKO_clonotype40	5	TRB:CTCSAGGRYAEQFF
clone_41_seq_1	aKO_aKO_clonotype42	5	TRB:CGASRVANSDYTF;TRA:CAVSEGSNYKLTF
clone_42_seq_1	aKO_aKO_clonotype43	5	TRB:CASNPGNSGNTLYF;TRA:CAAREGGGFTSGGNYKPTF;TRA:CAASLNTGGLSGKLTF
clone_43_seq_1	aKO_aKO_clonotype44	5	TRB:CAWTPGQNTEVFF;TRA:CAMRERDTGNYKYVF
clone_44_seq_1	aKO_aKO_clonotype37	4	TRB:CAWTPGQNTEVFF
clone_45_seq_1	aKO_aKO_clonotype45	4	TRB:CASSDGTGNSDYTF;TRA:CALGPQGGSAKLIF
clone_46_seq_1	aKO_aKO_clonotype46	4	TRB:CASSQEDSQNTLYF
clone_47_seq_1	aKO_aKO_clonotype49	4	TRB:CASSRVGSSAETLYF;TRA:CAAEFMSNYNVLYF
clone_48_seq_1	aKO_aKO_clonotype51	4	TRB:CTCSRDERKATLYF;TRA:CAVKTQVVGQLTF
clone_49_seq_1	aKO_aKO_clonotype47	3	TRB:CASGADRGLAETLYF;TRA:CAAFSGGSNAKLTF
clone_50_seq_1	aKO_aKO_clonotype48	3	TRB:CASSAGTPNSDYTF;TRB:CASSSGTKDTQYF;TRA:CALGRNSNNRIFF
clone_51_seq_1	aKO_aKO_clonotype53	3	TRB:CASSRGQTGQLYF;TRA:CAVSGPPDYSNNRLTL
clone_52_seq_1	aKO_aKO_clonotype54	3	TRB:CASSLQGAGGNTLYF;TRB:CASSPGGADERLFF;TRA:CAVKWDYNQGKLIF
clone_53_seq_1	aKO_aKO_clonotype55	3	TRB:CASRGAGANTEVFF;TRA:CAVSYSNTNKVVF
clone_54_seq_1	aKO_aKO_clonotype58	3	TRB:CASSDPGKNNERLFF;TRA:CAADRNSNNRIFF
clone_55_seq_1	aKO_aKO_clonotype59	3	TRB:CASSQEGTGGAETLYF;TRA:CAASEQGTGSKLSF
clone_56_seq_1	aKO_aKO_clonotype62	3	TRB:CASSQESRTGFYEQYF;TRA:CALRAGNTGKLIF
clone_57_seq_1	aKO_aKO_clonotype63	3	TRB:CSSSSRLGGRGYEQYF;TRA:CALGDLPGGYKVVF
clone_58_seq_1	aKO_aKO_clonotype64	3	TRB:CASSLEYEQYF;TRA:CAVSGQDTGNYKYVF
clone_59_seq_1	aKO_aKO_clonotype65	3	TRB:CASSLEYEQYF;TRA:CAASAGGNNKLTF
clone_60_seq_1	aKO_aKO_clonotype50	2	TRB:CASSFSGTGGDTQYF
clone_61_seq_1	aKO_aKO_clonotype52	2	TRB:CASSDWGSSYEQYF;TRA:CALSDRSGNTGKLIF
clone_62_seq_1	aKO_aKO_clonotype56	2	TRB:CASSRWGGADEQYF
clone_63_seq_1	aKO_aKO_clonotype57	2	TRB:CASSQENWGDEQYF;TRB:CASSSPGRPQAPLF;TRA:CAMRGTSSGQKLVF
clone_64_seq_1	aKO_aKO_clonotype60	2	TRB:CASSFDRATGQLYF
clone_65_seq_1	aKO_aKO_clonotype61	2	TRB:CASSQTGGSAETLYF;TRA:CAAERMSNYNVLYF;TRA:CAAERNNAGAKLTF
clone_66_seq_1	aKO_aKO_clonotype66	2	TRB:CASSLLGGAETLYF
clone_67_seq_1	aKO_aKO_clonotype67	2	TRB:CASSGPYAEQFF;TRA:CAEYTNAYKVIF
clone_68_seq_1	aKO_aKO_clonotype68	2	TRB:CASSPGANTEVFF;TRA:CALGRMSNYNVLYF
clone_69_seq_1	aKO_aKO_clonotype70	2	TRB:CASSRQNTEVFF;TRA:CAMRERDSGGSNAKLTF
clone_70_seq_1	aKO_aKO_clonotype72	2	TRB:CASSLQGYEQYF;TRA:CALEQGSWQLIF
clone_71_seq_1	aKO_aKO_clonotype73	2	TRB:CASGDWGSAETLYF;TRA:CAASKQGGSAKLIF
clone_72_seq_1	aKO_aKO_clonotype74	2	TRB:CASSLSKYEQYF;TRA:CAMEAGSWQLIF
clone_73_seq_1	aKO_aKO_clonotype75	2	TRB:CASSQETGGYEQYF;TRA:CAVSTSGGNYKPTF
clone_74_seq_1	aKO_aKO_clonotype76	2	TRB:CASSQDPDGDTQYF;TRA:CAMEAGGYKVVF;TRA:CASNMGYKLTF
clone_75_seq_1	aKO_aKO_clonotype77	2	TRB:CASSQEDWGDEQYF;TRA:CAASETGSGGKLTL
clone_76_seq_1	aKO_aKO_clonotype78	2	TRB:CASSQENWGDEQYF;TRA:CALSRNTGNYKYVF
clone_77_seq_1	aKO_aKO_clonotype79	2	TRB:CASSQEGTDNERLFF;TRA:CALSGGNYAQGLTF
clone_78_seq_1	aKO_aKO_clonotype80	2	TRB:CASSLDRVTEVFF;TRA:CALDRGTNKVVF
clone_79_seq_1	aKO_aKO_clonotype81	2	TRB:CASSVAGGAGNSPLYF;TRA:CALGDSGGSNAKLTF
clone_80_seq_1	aKO_aKO_clonotype82	2	TRB:CASSQETGSAETLYF;TRA:CALSESTGYQNFYF
clone_81_seq_1	aKO_aKO_clonotype83	2	TRB:CASSRDRAYNSPLYF;TRA:CAASMMDSNYQLIW
clone_82_seq_1	aKO_aKO_clonotype86	2	TRB:CASSIEQTNTEVFF;TRA:CVLSGGSALGRLHF
clone_83_seq_1	aKO_aKO_clonotype88	2	TRB:CASSQDAGLGSYEQYF;TRA:CAASEHTGYQNFYF
clone_84_seq_1	aKO_aKO_clonotype89	2	TRB:CASSLEGNSNERLFF;TRA:CAVSIRDMGYKLTF
clone_85_seq_1	aKO_aKO_clonotype90	2	TRB:CASSFDWGNTGQLYF;TRA:CALGARTGGYKVVF
clone_86_seq_1	aKO_aKO_clonotype91	2	TRB:CASSILLGGPNTGQLYF;TRA:CALSDRNYAQGLTF
clone_87_seq_1	aKO_aKO_clonotype93	2	TRB:CASGETANSDYTF;TRA:CAMGGNYAQGLTF
clone_88_seq_1	aKO_aKO_clonotype94	2	TRB:CASGDAGLGGFSAETLYF;TRA:CAMSGYNQGKLIF
clone_89_seq_1	aKO_aKO_clonotype100	1	TRB:CSSREQTEVFF;TRA:CAVRMSNYNVLYF
clone_90_seq_1	aKO_aKO_clonotype101	1	TRB:CGARDTGQLYF;TRA:CAASERRGTGSNRLTF
clone_91_seq_1	aKO_aKO_clonotype102	1	TRB:CAWSLQGTDYTF
clone_92_seq_1	aKO_aKO_clonotype103	1	TRB:CASSDGYEQYF
clone_93_seq_1	aKO_aKO_clonotype104	1	TRB:CGARQGSDTQYF
clone_94_seq_1	aKO_aKO_clonotype105	1	TRB:CAWSLGIGEVFF;TRA:CAAESYYNQGKLIF
clone_95_seq_1	aKO_aKO_clonotype106	1	TRB:CSGTGGRAEVFF;TRA:CAVRPNYNVLYF
clone_96_seq_1	aKO_aKO_clonotype108	1	TRA:CAAEANYAQGLTF
clone_97_seq_1	aKO_aKO_clonotype109	1	TRB:CASRWTGSEVFF
clone_98_seq_1	aKO_aKO_clonotype110	1	TRB:CASSLQNSPLYF
clone_99_seq_1	aKO_aKO_clonotype111	1	TRB:CASGDAAAEVFF
clone_100_seq_1	aKO_aKO_clonotype112	1	TRB:CASSMGGQDTQYF
clone_101_seq_1	aKO_aKO_clonotype113	1	TRB:CASSAAGTAEVFF
clone_102_seq_1	aKO_aKO_clonotype114	1	TRB:CASSGTGNSDYTF
clone_103_seq_1	aKO_aKO_clonotype115	1	TRB:CASSGGLGAEQFF
clone_104_seq_1	aKO_aKO_clonotype118	1	TRB:CASSEGNTEVFF;TRA:CALPRNNYAQGLTF
clone_105_seq_1	aKO_aKO_clonotype119	1	TRB:CASSGGLGAEQFF;TRA:CAMDPNNYAQGLTF
clone_106_seq_1	aKO_aKO_clonotype120	1	TRB:CASSSRVEVFF;TRA:CAAHRGSALGRLHF
clone_107_seq_1	aKO_aKO_clonotype121	1	TRB:CGARDRSTGQLYF;TRA:CALGDNRIFF
clone_108_seq_1	aKO_aKO_clonotype122	1	TRB:CAWTPGQNTEVFF;TRA:CAASRGGTGNYKYVF
clone_109_seq_1	aKO_aKO_clonotype123	1	TRB:CSSRGGTNTEVFF;TRA:CAVSETGGYKVVF
clone_110_seq_1	aKO_aKO_clonotype124	1	TRB:CASSLETLYF;TRA:CAVSAGGSNAKLTF
clone_111_seq_1	aKO_aKO_clonotype125	1	TRB:CAAGQNYAEQFF;TRB:CTCSAEGTPNSDYTF;TRA:CAASVTGSGGKLTL
clone_112_seq_1	aKO_aKO_clonotype126	1	TRB:CASGDGGDTQYF;TRA:CALSEPGTGSNRLTF
clone_113_seq_1	aKO_aKO_clonotype127	1	TRB:CASREGQEVFF;TRA:CALSLNSGGSNAKLTF
clone_114_seq_1	aKO_aKO_clonotype128	1	TRA:CAARDSNYQLIW
clone_115_seq_1	aKO_aKO_clonotype129	1	TRA:CAARQGGRALIF
clone_116_seq_1	aKO_aKO_clonotype130	1	TRB:CASSQSSYEQYF
clone_117_seq_1	aKO_aKO_clonotype131	1	TRA:CAAFSGGSNAKLTF
clone_118_seq_1	aKO_aKO_clonotype132	1	TRB:CAWSLLASAETLYF
clone_119_seq_1	aKO_aKO_clonotype133	1	TRB:CAWSLWLGGFEQYF
clone_120_seq_1	aKO_aKO_clonotype134	1	TRB:CAWDRDRGPGQLYF
clone_121_seq_1	aKO_aKO_clonotype135	1	TRB:CASSLQDEQYF
clone_122_seq_1	aKO_aKO_clonotype136	1	TRB:CASSPQGAETLYF
clone_123_seq_1	aKO_aKO_clonotype137	1	TRB:CASSEGTPYEQYF
clone_124_seq_1	aKO_aKO_clonotype138	1	TRB:CASSAGGGSPLYF
clone_125_seq_1	aKO_aKO_clonotype139	1	TRB:CASSAGGGSPLYF
clone_126_seq_1	aKO_aKO_clonotype140	1	TRB:CASSDWGSSYEQYF
clone_127_seq_1	aKO_aKO_clonotype141	1	TRB:CASSDWGSSYEQYF
clone_128_seq_1	aKO_aKO_clonotype142	1	TRB:CASSETDNNQAPLF
clone_129_seq_1	aKO_aKO_clonotype143	1	TRB:CASSDMGRNTEVFF
clone_130_seq_1	aKO_aKO_clonotype144	1	TRB:CASSDMGRNTEVFF
clone_131_seq_1	aKO_aKO_clonotype145	1	TRB:CASSDAQRAETLYF
clone_132_seq_1	aKO_aKO_clonotype147	1	TRB:CASSDGGNTGQLYF
clone_133_seq_1	aKO_aKO_clonotype148	1	TRB:CASSDWGLGDTQYF
clone_134_seq_1	aKO_aKO_clonotype149	1	TRB:CASSYPRGEQYF
clone_135_seq_1	aKO_aKO_clonotype150	1	TRB:CGARDLISNERLFF
clone_136_seq_1	aKO_aKO_clonotype151	1	TRB:CASSDGTGGYEQYF;TRA:CALNYNQGKLIF
clone_137_seq_1	aKO_aKO_clonotype152	1	TRB:CASSRDNYEQYF;TRA:CALERDNYAQGLTF
clone_138_seq_1	aKO_aKO_clonotype153	1	TRB:CGARHWGSAETLYF;TRA:CALERGTGYQNFYF
clone_139_seq_1	aKO_aKO_clonotype154	1	TRB:CASSAGTPNSDYTF;TRA:CAASRWNYNVLYF
clone_140_seq_1	aKO_aKO_clonotype155	1	TRB:CASSDGGNTGQLYF;TRB:CASSQDWGGYEQYF;TRA:CAASEANTGKLTF;TRA:CAASLYSNNRLTL
clone_141_seq_1	aKO_aKO_clonotype156	1	TRB:CASSDGGNTGQLYF;TRA:CAASLYSNNRLTL
clone_142_seq_1	aKO_aKO_clonotype157	1	TRB:CASSWTPSYEQYF;TRA:CAVSLTGNTGKLIF
clone_143_seq_1	aKO_aKO_clonotype158	1	TRB:CASSRQNTEVFF;TRA:CAMRERDSGGSNAKLTF
clone_144_seq_1	aKO_aKO_clonotype159	1	TRB:CASSDRDNQAPLF;TRA:CAASDYSNNRLTL
clone_145_seq_1	aKO_aKO_clonotype160	1	TRB:CASSQDWGEEQYF;TRA:CAARYTGNYKYVF
clone_146_seq_1	aKO_aKO_clonotype161	1	TRB:CASSLQGTLYF;TRA:CAAGSLTGSGGKLTL
clone_147_seq_1	aKO_aKO_clonotype162	1	TRB:CASSRDNYAEQFF
clone_148_seq_1	aKO_aKO_clonotype163	1	TRB:CASSRDNYAEQFF
clone_149_seq_1	aKO_aKO_clonotype164	1	TRB:CASSSGGYAEQFF
clone_150_seq_1	aKO_aKO_clonotype165	1	TRB:CASRRGGADTEVFF
clone_151_seq_1	aKO_aKO_clonotype166	1	TRB:CASRRGGADTEVFF
clone_152_seq_1	aKO_aKO_clonotype167	1	TRB:CASSQRDWGETLYF
clone_153_seq_1	aKO_aKO_clonotype168	1	TRB:CASSQDNSNTEVFF
clone_154_seq_1	aKO_aKO_clonotype169	1	TRB:CASSQENWGDEQYF
clone_155_seq_1	aKO_aKO_clonotype170	1	TRB:CASRGAGANTEVFF
clone_156_seq_1	aKO_aKO_clonotype171	1	TRB:CASRGAGANTEVFF
clone_157_seq_1	aKO_aKO_clonotype172	1	TRB:CAWSLDRGGGNTLYF
clone_158_seq_1	aKO_aKO_clonotype173	1	TRA:CAAAMLSGSFNKLTF
clone_159_seq_1	aKO_aKO_clonotype174	1	TRB:CASSSRADEQFF
clone_160_seq_1	aKO_aKO_clonotype175	1	TRB:CASRSGGYEQYF
clone_161_seq_1	aKO_aKO_clonotype176	1	TRB:CASSSDTYEQYF
clone_162_seq_1	aKO_aKO_clonotype177	1	TRB:CASSLDPERLFF
clone_163_seq_1	aKO_aKO_clonotype178	1	TRB:CASSPGTETLYF
clone_164_seq_1	aKO_aKO_clonotype179	1	TRB:CASSYNNQAPLF
clone_165_seq_1	aKO_aKO_clonotype180	1	TRB:CASSTGGGYAEQFF
clone_166_seq_1	aKO_aKO_clonotype181	1	TRB:CASSEGAGGLEQYF
clone_167_seq_1	aKO_aKO_clonotype182	1	TRB:CASSDGTGGDEQYF
clone_168_seq_1	aKO_aKO_clonotype183	1	TRB:CASSPGTPNYAEQFF
clone_169_seq_1	aKO_aKO_clonotype184	1	TRB:CASSPGTPNYAEQFF
clone_170_seq_1	aKO_aKO_clonotype185	1	TRB:CASSDARGANSDYTF
clone_171_seq_1	aKO_aKO_clonotype186	1	TRB:CTCSARAEQYF
clone_172_seq_1	aKO_aKO_clonotype188	1	TRB:CGARDRWGNYAEQFF
clone_173_seq_1	aKO_aKO_clonotype189	1	TRB:CASSSQGANTGQLYF;TRA:CAISGGKLIF
clone_174_seq_1	aKO_aKO_clonotype190	1	TRB:CASSGWESSYEQYF;TRA:CAFNNNNAPRF
clone_175_seq_1	aKO_aKO_clonotype191	1	TRB:CASSDNRGQDTQYF;TRA:CAVMNYNQGKLIF
clone_176_seq_1	aKO_aKO_clonotype192	1	TRB:CASSRDNYAEQFF;TRA:CAMRTNAYKVIF
clone_177_seq_1	aKO_aKO_clonotype193	1	TRB:CASSPPGGSDYTF;TRA:CARDTNAYKVIF
clone_178_seq_1	aKO_aKO_clonotype194	1	TRB:CASSQDGGNSPLYF;TRA:CAASEHAGAKLTF
clone_179_seq_1	aKO_aKO_clonotype195	1	TRB:CTGHSGNTLYF;TRA:CALAFNVGDNSKLIW
clone_180_seq_1	aKO_aKO_clonotype196	1	TRB:CTGHSGNTLYF;TRA:CAAEAWTEGADRLTF
clone_181_seq_1	aKO_aKO_clonotype197	1	TRB:CASSDAQGGYEQYF;TRB:CTCSAGALEVFF;TRA:CAARGGPNTGKLTF
clone_182_seq_1	aKO_aKO_clonotype198	1	TRB:CASSQDWGGYEQYF;TRA:CAASEANTGKLTF
clone_183_seq_1	aKO_aKO_clonotype200	1	TRB:CASSWGRAEQFF;TRA:CALRAGNTGKLIF
clone_184_seq_1	aKO_aKO_clonotype201	1	TRB:CASSDARGAETLYF;TRB:CASSDLQGNAEQFF;TRA:CAASINYNQGKLIF
clone_185_seq_1	aKO_aKO_clonotype202	1	TRB:CASSDPGKNNERLFF;TRA:CAASKQGGSAKLIF
clone_186_seq_1	aKO_aKO_clonotype203	1	TRB:CASSQEGDRDTLYF;TRA:CAASMNNNAGAKLTF
clone_187_seq_1	aKO_aKO_clonotype204	1	TRB:CASRGEIYEQYF;TRB:CASSLDRTSAETLYF;TRA:CAASADYQGGRALIF
clone_188_seq_1	aKO_aKO_clonotype205	1	TRB:CASSRRDWDEQYF;TRA:CALSAYQGGRALIF
clone_189_seq_1	aKO_aKO_clonotype206	1	TRB:CAWSLGQGSNERLFF;TRA:CALGDISAGNKLTF
clone_190_seq_1	aKO_aKO_clonotype207	1	TRB:CASSLNSGNTLYF;TRA:CAMRGPFNYGNEKITF
clone_191_seq_1	aKO_aKO_clonotype208	1	TRB:CASSDAGASAETLYF;TRA:CAGHNTNTGKLTF
clone_192_seq_1	aKO_aKO_clonotype209	1	TRB:CASRGDGQNTLYF;TRA:CAASATSSGQKLVF
clone_193_seq_1	aKO_aKO_clonotype210	1	TRA:CAVSIRDMGYKLTF
clone_194_seq_1	aKO_aKO_clonotype211	1	TRA:CAVSIRDMGYKLTF
clone_195_seq_1	aKO_aKO_clonotype212	1	TRA:CVLGDGGGRALIF
clone_196_seq_1	aKO_aKO_clonotype213	1	TRA:CAASNNNNAPRF
clone_197_seq_1	aKO_aKO_clonotype214	1	TRB:CASSLNRVYAEQFF
clone_198_seq_1	aKO_aKO_clonotype215	1	TRB:CASSFNRGVTEVFF
clone_199_seq_1	aKO_aKO_clonotype216	1	TRB:CASSLWGDNQAPLF
clone_200_seq_1	aKO_aKO_clonotype217	1	TRB:CASSQETGSAETLYF
clone_201_seq_1	aKO_aKO_clonotype218	1	TRB:CASSQDGVNQDTQYF
clone_202_seq_1	aKO_aKO_clonotype219	1	TRB:CASSQGTGWDSPLYF
clone_203_seq_1	aKO_aKO_clonotype220	1	TRB:CASSPPGVSAETLYF
clone_204_seq_1	aKO_aKO_clonotype221	1	TRB:CASSRLGANTGQLYF
clone_205_seq_1	aKO_aKO_clonotype222	1	TRB:CASSRLGANTGQLYF
clone_206_seq_1	aKO_aKO_clonotype224	1	TRB:CASSRDSNSDYTF
clone_207_seq_1	aKO_aKO_clonotype225	1	TRB:CASSGGSAETLYF
clone_208_seq_1	aKO_aKO_clonotype226	1	TRB:CASSTGTANTEVFF
clone_209_seq_1	aKO_aKO_clonotype227	1	TRB:CASSSRDWGDEQYF
clone_210_seq_1	aKO_aKO_clonotype228	1	TRB:CASSPGSNSDYTF
clone_211_seq_1	aKO_aKO_clonotype229	1	TRB:CASSLQANTEVFF
clone_212_seq_1	aKO_aKO_clonotype230	1	TRB:CASSAGLSYEQYF
clone_213_seq_1	aKO_aKO_clonotype231	1	TRB:CASSSGTKDTQYF
clone_214_seq_1	aKO_aKO_clonotype232	1	TRB:CASSSGTKDTQYF
clone_215_seq_1	aKO_aKO_clonotype233	1	TRB:CASSAGEGNTLYF
clone_216_seq_1	aKO_aKO_clonotype234	1	TRB:CASSLEIYAEQFF
clone_217_seq_1	aKO_aKO_clonotype237	1	TRB:CASSSPGRPQAPLF
clone_218_seq_1	aKO_aKO_clonotype238	1	TRB:CTCSEQGYEQYF
clone_219_seq_1	aKO_aKO_clonotype239	1	TRB:CTCSADRDTQYF
clone_220_seq_1	aKO_aKO_clonotype240	1	TRB:CTCSADRDTQYF
clone_221_seq_1	aKO_aKO_clonotype241	1	TRB:CTCGLGEDTQYF
clone_222_seq_1	aKO_aKO_clonotype242	1	TRB:CASRGPNYAEQFF;TRA:CAAEASYANKMIF
clone_223_seq_1	aKO_aKO_clonotype243	1	TRB:CASSPHRLQDTQYF;TRA:CAMEGNYAQGLTF
clone_224_seq_1	aKO_aKO_clonotype244	1	TRB:CASSWDRGDTQYF;TRA:CATEDSGTYQRF
clone_225_seq_1	aKO_aKO_clonotype246	1	TRB:CASSSGTKDTQYF;TRA:CALGRNSNNRIFF
clone_226_seq_1	aKO_aKO_clonotype247	1	TRB:CASSRDWGYEQYF;TRA:CAGRAGNTGKLIF
clone_227_seq_1	aKO_aKO_clonotype248	1	TRB:CASSEGDRLGAEQFF;TRA:CALSNNRIFF
clone_228_seq_1	aKO_aKO_clonotype249	1	TRB:CASSWTGGANTLYF;TRA:CAVSARGGRALIF
clone_229_seq_1	aKO_aKO_clonotype250	1	TRB:CASSQETGSAETLYF;TRA:CAVSIRDMGYKLTF
clone_230_seq_1	aKO_aKO_clonotype252	1	TRB:CASSLGTNTEVFF;TRA:CAASRASGSWQLIF
clone_231_seq_1	aKO_aKO_clonotype254	1	TRB:CASSQEWAANTEVFF;TRA:CAANGSSGNKLIF
clone_232_seq_1	aKO_aKO_clonotype255	1	TRB:CASKQNSYNSPLYF;TRA:CAASGASAGNKLTF;TRA:CALGERENSNNRIFF
clone_233_seq_1	aKO_aKO_clonotype256	1	TRB:CASSQEGTINERLFF;TRA:CAASRNNAGAKLTF
clone_234_seq_1	aKO_aKO_clonotype257	1	TRB:CASSSTGQNTLYF;TRA:CALGPSTGGYKVVF;TRA:CAVSGAGNTGKLIF
clone_235_seq_1	aKO_aKO_clonotype258	1	TRB:CASSEGWGGSETLYF;TRA:CAASVGGSNAKLTF
clone_236_seq_1	aKO_aKO_clonotype259	1	TRB:CASSQEWGGADTQYF;TRA:CAMREGRANTGKLTF
clone_237_seq_1	aKO_aKO_clonotype260	1	TRB:CASSGAPNTGQLYF;TRA:CALSDRGMLSGSFNKLTF
clone_238_seq_1	aKO_aKO_clonotype261	1	TRB:CASSPEGFSNERLFF;TRA:CAASEGGSAKLIF
clone_239_seq_1	aKO_aKO_clonotype262	1	TRB:CASSIDTGQLYF
clone_240_seq_1	aKO_aKO_clonotype263	1	TRB:CASSMGEDTQYF
clone_241_seq_1	aKO_aKO_clonotype264	1	TRA:CAVRVNSNNRIFF
clone_242_seq_1	aKO_aKO_clonotype265	1	TRB:CASSRQDLSNERLFF
clone_243_seq_1	aKO_aKO_clonotype266	1	TRB:CASSQEQGENNSPLYF
clone_244_seq_1	aKO_aKO_clonotype267	1	TRB:CASSQEGRTANTEVFF
clone_245_seq_1	aKO_aKO_clonotype270	1	TRB:CASSQEGGRDNERLFF
clone_246_seq_1	aKO_aKO_clonotype271	1	TRB:CASSQEARTGPTEVFF
clone_247_seq_1	aKO_aKO_clonotype272	1	TRB:CASSQEARTGPTEVFF
clone_248_seq_1	aKO_aKO_clonotype273	1	TRB:CASSQESRTGFYEQYF
clone_249_seq_1	aKO_aKO_clonotype274	1	TRB:CASSQDFQGVGNTLYF
clone_250_seq_1	aKO_aKO_clonotype275	1	TRA:CALSPNYNQGKLIF
clone_251_seq_1	aKO_aKO_clonotype276	1	TRA:CALGDESNYQLIW
clone_252_seq_1	aKO_aKO_clonotype277	1	TRB:CASSDWGNYAEQFF
clone_253_seq_1	aKO_aKO_clonotype278	1	TRB:CASSDWGNYAEQFF
clone_254_seq_1	aKO_aKO_clonotype279	1	TRB:CASSWTISGNTLYF
clone_255_seq_1	aKO_aKO_clonotype280	1	TRB:CASSWGTGFAEQFF
clone_256_seq_1	aKO_aKO_clonotype281	1	TRB:CASSFGHSAETLYF
clone_257_seq_1	aKO_aKO_clonotype282	1	TRB:CASSRRWGGTETLYF
clone_258_seq_1	aKO_aKO_clonotype283	1	TRB:CASSRDAGADAEQFF
clone_259_seq_1	aKO_aKO_clonotype284	1	TRB:CASSRVGSSAETLYF
clone_260_seq_1	aKO_aKO_clonotype285	1	TRB:CASSRVGSSAETLYF
clone_261_seq_1	aKO_aKO_clonotype286	1	TRB:CASSSPGTNQDTQYF
clone_262_seq_1	aKO_aKO_clonotype287	1	TRB:CASSWGQGGSDYTF
clone_263_seq_1	aKO_aKO_clonotype288	1	TRB:CASSLGGRNTEVFF
clone_264_seq_1	aKO_aKO_clonotype289	1	TRB:CASSLGGALAEQFF
clone_265_seq_1	aKO_aKO_clonotype291	1	TRB:CASSTGTANSDYTF
clone_266_seq_1	aKO_aKO_clonotype292	1	TRB:CASSRQGGTGQLYF
clone_267_seq_1	aKO_aKO_clonotype293	1	TRB:CASSPMGTGVEQYF
clone_268_seq_1	aKO_aKO_clonotype294	1	TRB:CASSELQGGGQNTLYF
clone_269_seq_1	aKO_aKO_clonotype295	1	TRB:CASSDGPGGGQNTLYF
clone_270_seq_1	aKO_aKO_clonotype296	1	TRB:CASSDAGTFTSQNTLYF
clone_271_seq_1	aKO_aKO_clonotype297	1	TRB:CASSQTGGSAETLYF
clone_272_seq_1	aKO_aKO_clonotype298	1	TRB:CTCSADDRYEQYF
clone_273_seq_1	aKO_aKO_clonotype299	1	TRB:CTCSGGTYTEVFF
clone_274_seq_1	aKO_aKO_clonotype300	1	TRB:CASSLDSGVNTLYF;TRA:CAAGNTGYQNFYF;TRA:CAASVTGNYKYVF
clone_275_seq_1	aKO_aKO_clonotype302	1	TRB:CTCSVSYNSPLYF;TRA:CILRVWGGNAGAKLTF
clone_276_seq_1	aKO_aKO_clonotype303	1	TRB:CASSLGGARTEVFF;TRA:CALERKGGSNAKLTF
clone_277_seq_1	aKO_aKO_clonotype304	1	TRB:CASSRGQNSGNTLYF;TRA:CAASQNSNNRIFF
clone_278_seq_1	aKO_aKO_clonotype305	1	TRB:CASSQESRTGFYEQYF;TRA:CAMRDTGGSNAKLTF
clone_279_seq_1	aKO_aKO_clonotype307	1	TRB:CASSFGGIQDTQYF;TRA:CAVSATDSNYQLIW
clone_280_seq_1	aKO_aKO_clonotype308	1	TRB:CASSLEQGGNTLYF;TRA:CAASRTGGYKVVF
clone_281_seq_1	aKO_aKO_clonotype309	1	TRB:CASSNGLGGQDTQYF;TRA:CAASTNMGYKLTF
clone_282_seq_1	aKO_aKO_clonotype310	1	TRB:CASSQEARTGPTEVFF;TRA:CAMSGYNQGKLIF
clone_283_seq_1	aKO_aKO_clonotype311	1	TRB:CASSQEGARDTQYF;TRA:CALSERTNAYKVIF
clone_284_seq_1	aKO_aKO_clonotype312	1	TRB:CASSLGQGVTEVFF;TRA:CAVSANTNTGKLTF
clone_285_seq_1	aKO_aKO_clonotype313	1	TRB:CASSQEGGRDNERLFF;TRA:CALGDLYTNTGKLTF
clone_286_seq_1	aKO_aKO_clonotype314	1	TRB:CASSLTTDSYEQYF;TRA:CAMRSSSGSWQLIF
clone_287_seq_1	aKO_aKO_clonotype315	1	TRB:CASSLEASNSDYTF;TRA:CAAMKGGRALIF
clone_288_seq_1	aKO_aKO_clonotype316	1	TRB:CASSLGASAETLYF;TRA:CAARYNQGKLIF
clone_289_seq_1	aKO_aKO_clonotype317	1	TRB:CASSLGDWGYEQYF;TRA:CAAGAGGSNAKLTF
clone_290_seq_1	aKO_aKO_clonotype319	1	TRA:CAVSEHTGGLSGKLTF
clone_291_seq_1	aKO_aKO_clonotype320	1	TRB:CASSRDRGWEQYF
clone_292_seq_1	aKO_aKO_clonotype321	1	TRB:CASSIKGNSPLYF
clone_293_seq_1	aKO_aKO_clonotype322	1	TRB:CASGAGGYAEQFF
clone_294_seq_1	aKO_aKO_clonotype324	1	TRB:CASRPRGWGGQNTLYF
clone_295_seq_1	aKO_aKO_clonotype325	1	TRB:CASSQEGTGANQDTQYF
clone_296_seq_1	aKO_aKO_clonotype326	1	TRB:CASSPQGISNERLFF
clone_297_seq_1	aKO_aKO_clonotype327	1	TRB:CASSSPGGSAETLYF
clone_298_seq_1	aKO_aKO_clonotype328	1	TRB:CASSLEGNSNERLFF
clone_299_seq_1	aKO_aKO_clonotype329	1	TRB:CASSLEGNSNERLFF
clone_300_seq_1	aKO_aKO_clonotype330	1	TRB:CASSLGRASQNTLYF
clone_301_seq_1	aKO_aKO_clonotype331	1	TRB:CASSFDWGNTGQLYF
clone_302_seq_1	aKO_aKO_clonotype332	1	TRB:CASSFDWGNTGQLYF
clone_303_seq_1	aKO_aKO_clonotype333	1	TRB:CASSSRDWDSAETLYF
clone_304_seq_1	aKO_aKO_clonotype334	1	TRB:CASSRTGGGYAEQFF
clone_305_seq_1	aKO_aKO_clonotype335	1	TRB:CASSPLWDRVAEQFF
clone_306_seq_1	aKO_aKO_clonotype336	1	TRB:CASSPGTGGYAEQFF
clone_307_seq_1	aKO_aKO_clonotype337	1	TRB:CASSLPGEANTEVFF
clone_308_seq_1	aKO_aKO_clonotype338	1	TRB:CASSQRLGASAETLYF
clone_309_seq_1	aKO_aKO_clonotype339	1	TRB:CASSQDRDRGYAEQFF
clone_310_seq_1	aKO_aKO_clonotype341	1	TRB:CTCSADRANAEQFF
clone_311_seq_1	aKO_aKO_clonotype342	1	TRB:CTCSAGQGAAEQFF
clone_312_seq_1	aKO_aKO_clonotype343	1	TRB:CTCSAGGGNSPLYF
clone_313_seq_1	aKO_aKO_clonotype344	1	TRB:CTCSAVFGKDTQYF
clone_314_seq_1	aKO_aKO_clonotype345	1	TRB:CTCSAQGADERLFF
clone_315_seq_1	aKO_aKO_clonotype346	1	TRB:CTCSGTGTGNTLYF
clone_316_seq_1	aKO_aKO_clonotype347	1	TRB:CTCSVEFNQDTQYF
clone_317_seq_1	aKO_aKO_clonotype348	1	TRB:CTCSADSSGNTLYF;TRA:CAVSNYNVLYF
clone_318_seq_1	aKO_aKO_clonotype349	1	TRB:CASSPGLGNQDTQYF;TRA:CAVRMSNYNVLYF
clone_319_seq_1	aKO_aKO_clonotype350	1	TRB:CASSFSGTGGDTQYF;TRA:CVLSVNYNQGKLIF
clone_320_seq_1	aKO_aKO_clonotype352	1	TRB:CASSFSGTGGDTQYF;TRA:CAASKQGGSAKLIF
clone_321_seq_1	aKO_aKO_clonotype353	1	TRB:CASSTDRVYSNERLFF;TRA:CAASVYYGNEKITF
clone_322_seq_1	aKO_aKO_clonotype354	1	TRB:CTCRAGGAGSDYTF;TRA:CAATTNAYKVIF;TRA:CALDRNSNNRIFF
clone_323_seq_1	aKO_aKO_clonotype355	1	TRB:CASSQEGPGTGQDTQYF;TRA:CALGDNYAQGLTF
clone_324_seq_1	aKO_aKO_clonotype356	1	TRB:CASSQDWGGSMAEQFF;TRA:CASSSGGSNAKLTF
clone_325_seq_1	aKO_aKO_clonotype358	1	TRB:CASSSPGQGKDEQYF;TRA:CAASSNNNNAPRF
clone_326_seq_1	aKO_aKO_clonotype359	1	TRB:CASSLDPDWGYEQYF;TRA:CAASATTQVVGQLTF
clone_327_seq_1	aKO_aKO_clonotype362	1	TRB:CASSIEQTNTEVFF
clone_328_seq_1	aKO_aKO_clonotype363	1	TRB:CASSIEQTNTEVFF
clone_329_seq_1	aKO_aKO_clonotype364	1	TRB:CASSIGVSNERLFF
clone_330_seq_1	aKO_aKO_clonotype365	1	TRB:CASSMQKNTGQLYF
clone_331_seq_1	aKO_aKO_clonotype366	1	TRB:CASSQGLGAETLYF
clone_332_seq_1	aKO_aKO_clonotype367	1	TRA:CALSEGDNYAQGLTF
clone_333_seq_1	aKO_aKO_clonotype368	1	TRA:CALRPPNMGYKLTF
clone_334_seq_1	aKO_aKO_clonotype369	1	TRB:CASSFPPGGLNTEVFF
clone_335_seq_1	aKO_aKO_clonotype370	1	TRB:CASSLTLGANTGQLYF
clone_336_seq_1	aKO_aKO_clonotype371	1	TRB:CASSQDVDWTSQNTLYF
clone_337_seq_1	aKO_aKO_clonotype372	1	TRB:CASSQDVDWTSQNTLYF
clone_338_seq_1	aKO_aKO_clonotype373	1	TRB:CTCSAEGTPNSDYTF
clone_339_seq_1	aKO_aKO_clonotype374	1	TRB:CTCSADRWSSYEQYF
clone_340_seq_1	aKO_aKO_clonotype375	1	TRB:CTCSADGGVTGTLYF
clone_341_seq_1	aKO_aKO_clonotype376	1	TRB:CTCSAAQAANQAPLF
clone_342_seq_1	aKO_aKO_clonotype377	1	TRB:CTCSAVGGADSDYTF
clone_343_seq_1	aKO_aKO_clonotype378	1	TRB:CTCSAGHTPNERLFF
clone_344_seq_1	aKO_aKO_clonotype379	1	TRB:CASSIEGGQYEQYF;TRA:CAMNSGTYQRF
clone_345_seq_1	aKO_aKO_clonotype380	1	TRB:CASRLDPGISNERLFF;TRA:CAARPNYNVLYF
clone_346_seq_1	aKO_aKO_clonotype381	1	TRB:CTCSGRGLGAETLYF;TRA:CAARPSGTYQRF
clone_347_seq_1	aKO_aKO_clonotype382	1	TRB:CASSLEAGAATGQLYF;TRA:CAAEDYSNNRLTL
clone_348_seq_1	aKO_aKO_clonotype383	1	TRB:CTCSATPGVQDTQYF;TRA:CALAVSGSFNKLTF
clone_349_seq_1	aKO_aKO_clonotype384	1	TRB:CTCSAEGHPNSDYTF;TRA:CAASTGSSGNKLIF
clone_350_seq_1	aKO_aKO_clonotype386	1	TRB:CASNPGLGNTGQLYF
clone_351_seq_1	aKO_aKO_clonotype387	1	TRA:CAMRDHDTNAYKVIF
clone_352_seq_1	aKO_aKO_clonotype388	1	TRA:CAMRDHDTNAYKVIF
clone_353_seq_1	aKO_aKO_clonotype389	1	TRA:CAMREGEDNTGKLTF
clone_354_seq_1	aKO_aKO_clonotype390	1	TRA:CAMREGEDNTGKLTF
clone_355_seq_1	aKO_aKO_clonotype391	1	TRB:CASSPADWGESQNTLYF
clone_356_seq_1	aKO_aKO_clonotype392	1	TRB:CASSPRDWGHNYAEQFF
clone_357_seq_1	aKO_aKO_clonotype393	1	TRB:CASSLDPGQGDAETLYF
clone_358_seq_1	aKO_aKO_clonotype395	1	TRB:CTCSAPRLGGLDTQYF
clone_359_seq_1	aKO_aKO_clonotype396	1	TRB:CASSPTGGARDTQYF;TRA:CAVSMGYKLTF
clone_360_seq_1	aKO_aKO_clonotype397	1	TRB:CASSIAGGNYAEQFF;TRA:CAASGRNNRIFF
clone_361_seq_1	aKO_aKO_clonotype398	1	TRB:CASSIEGPSAETLYF;TRA:CALVDRNTNTGKLTF
clone_362_seq_1	aKO_aKO_clonotype399	1	TRB:CASSIEGGFSYEQYF;TRA:CAASEEGANTGKLTF
clone_363_seq_1	aKO_aKO_clonotype400	1	TRB:CASSIKRSPANTEVFF
clone_364_seq_1	aKO_aKO_clonotype401	1	TRA:CAMREGGNYNQGKLIF
clone_365_seq_1	aKO_aKO_clonotype402	1	TRB:CASALGGQVDTQYF
clone_366_seq_1	aKO_aKO_clonotype403	1	TRA:CAATTNAYKVIF
clone_367_seq_1	aKO_aKO_clonotype404	1	TRA:CAAGQGGRALIF
clone_368_seq_1	aKO_aKO_clonotype405	1	TRA:CAASSGGNNKLTF
clone_369_seq_1	aKO_aKO_clonotype406	1	TRA:CAASSGGNNKLTF
clone_370_seq_1	aKO_aKO_clonotype407	1	TRA:CAASETNTNKVVF
clone_371_seq_1	aKO_aKO_clonotype408	1	TRB:CASGESRGYNSPLYF
clone_372_seq_1	aKO_aKO_clonotype409	1	TRB:CASSLEYEQYF
clone_373_seq_1	aKO_aKO_clonotype410	1	TRB:CAGGQGYEQYF;TRA:CALEGRGNTGKLIF
clone_374_seq_1	aKO_aKO_clonotype411	1	TRA:CAAASSGSWQLIF
clone_375_seq_1	aKO_aKO_clonotype412	1	TRB:CASSPGQDTQYF
clone_376_seq_1	aKO_aKO_clonotype413	1	TRB:CASSLVGGEQYF
clone_377_seq_1	aKO_aKO_clonotype414	1	TRB:CASGESNERLFF;TRA:CALNYGSSGNKLIF
clone_378_seq_1	aKO_aKO_clonotype415	1	TRB:CASGPRGLEQYF;TRA:CAVSLTGNTGKLIF
clone_379_seq_1	aKO_aKO_clonotype416	1	TRB:CASGTGNYAEQFF
clone_380_seq_1	aKO_aKO_clonotype417	1	TRB:CASGDPSAETLYF
clone_381_seq_1	aKO_aKO_clonotype418	1	TRB:CASGDAGASDYTF
clone_382_seq_1	aKO_aKO_clonotype419	1	TRB:CASGDAGASDYTF
clone_383_seq_1	aKO_aKO_clonotype420	1	TRB:CASGDFGTYEQYF
clone_384_seq_1	aKO_aKO_clonotype421	1	TRB:CASSHRDGNTLYF
clone_385_seq_1	aKO_aKO_clonotype422	1	TRB:CASSLQGSDTLYF
clone_386_seq_1	aKO_aKO_clonotype423	1	TRB:CASSLGANSDYTF
clone_387_seq_1	aKO_aKO_clonotype424	1	TRB:CASSPGQDYEQYF;TRA:CALSMSNYNVLYF
clone_388_seq_1	aKO_aKO_clonotype425	1	TRB:CASGDAGASDYTF;TRA:CAVRPNTGANTGKLTF
clone_389_seq_1	aKO_aKO_clonotype426	1	TRB:CASGDAQYAEQFF;TRA:CAADTNAYKVIF
clone_390_seq_1	aKO_aKO_clonotype427	1	TRB:CASGGTASAETLYF
clone_391_seq_1	aKO_aKO_clonotype428	1	TRB:CASSLLGGLDTLYF
clone_392_seq_1	aKO_aKO_clonotype429	1	TRB:CASSQGTGAETLYF;TRA:CAIDKYDSGYNKLTF
clone_393_seq_1	aKO_aKO_clonotype431	1	TRB:CASGDRGNNQAPLF;TRA:CAASDNNNAPRF
clone_394_seq_1	aKO_aKO_clonotype432	1	TRB:CASGAGQNNQAPLF;TRA:CAAMTGGYKVVF
clone_395_seq_1	aKO_aKO_clonotype433	1	TRB:CASGEGGGWNSPLYF
clone_396_seq_1	aKO_aKO_clonotype435	1	TRB:CASGDRQGTTGQLYF
clone_397_seq_1	aKO_aKO_clonotype436	1	TRB:CASGDARGYNSPLYF
clone_398_seq_1	aKO_aKO_clonotype438	1	TRB:CASGDAGDSNSDYTF;TRA:CAFPRNTGNYKYVF
clone_399_seq_1	aKO_aKO_clonotype439	1	TRB:CASSLDGGGNERLFF;TRA:CALGSSNTNKVVF
clone_400_seq_1	aKO_aKO_clonotype441	1	TRB:CASSPPGPLSNERLFF
clone_401_seq_1	aKO_aKO_clonotype442	1	TRB:CASGSGTGVGTGQLYF;TRA:CAVSAEASGGNYKPTF
clone_402_seq_1	aKO_aKO_clonotype443	1	TRA:CALTRNTGNYKYVF
clone_403_seq_1	aKO_aKO_clonotype444	1	TRB:CASGDATGGADTGQLYF
clone_404_seq_1	aKO_aKO_clonotype69	1	TRB:CASSDMGRNTEVFF;TRA:CVLGEPGGRALIF
clone_405_seq_1	aKO_aKO_clonotype71	1	TRB:CASGDADSPSGNTLYF;TRA:CATRAGNTGKLIF
clone_406_seq_1	aKO_aKO_clonotype84	1	TRB:CASSSPGRPQAPLF;TRA:CALGHVNTGNYKYVF
clone_407_seq_1	aKO_aKO_clonotype85	1	TRB:CASSQETGGYEQYF;TRA:CAMRDPNNYAQGLTF
clone_408_seq_1	aKO_aKO_clonotype87	1	TRB:CASSGTGGAHEQYF;TRA:CAATGGYKVVF
clone_409_seq_1	aKO_aKO_clonotype92	1	TRB:CASSSGLGGRQNTLYF;TRA:CAMRDANSGTYQRF
clone_410_seq_1	aKO_aKO_clonotype95	1	TRB:CAWGAGERLFF
clone_411_seq_1	aKO_aKO_clonotype96	1	TRB:CASSEQYEQYF
clone_412_seq_1	aKO_aKO_clonotype97	1	TRB:CSSREQTEVFF
clone_413_seq_1	aKO_aKO_clonotype98	1	TRB:CSSREQTEVFF
clone_414_seq_1	aKO_aKO_clonotype99	1	TRB:CSSREQTEVFF
