# Supplementary material for: Propionyl-CoA carboxylase subunit B regulates anti-tumor T cells in a pancreatic cancer mouse model
Source: eLife. 2025 Mar 11;13:RP96925. doi: 10.7554/eLife.96925 (PMC11896608; doi:10.7554/eLife.96925)
Supplement: Figure 3—source data 2. [file elife-96925-fig3-data2.xlsx]

## Sheet: Sheet1
		WT	αKO	p-aKO
p-aKO	36			1
p-aKO	36			1
p-aKO	57			1
p-aKO	34			1
p-aKO	43			1
KPC	14	1
KPC	14	1
KPC	15	1
KPC	15	1
KPC	16	1
KPC	16	1
aKO	57		0
aKO	57		0
aKO	57		0
aKO	57		0
aKO	57		0
aKO	57		0
aKO	57		0
aKO	57		0
aKO	57		0
p-aKO	38			1
p-aKO	38			1
p-aKO	28			1
p-aKO	49			1
p-aKO	57			0
p-aKO	57			0
p-aKO	57			0
