# Supplementary material for: Propionyl-CoA carboxylase subunit B regulates anti-tumor T cells in a pancreatic cancer mouse model
Source: eLife. 2025 Mar 11;13:RP96925. doi: 10.7554/eLife.96925 (PMC11896608; doi:10.7554/eLife.96925)
Supplement: Figure 5—source data 1. [file elife-96925-fig5-data1.xlsx]

## Sheet: Sheet1
Cells implanted	Days	Vehicle	anti-PD1	PD1-/-
p-aKO	35	1
p-aKO	35	1
p-aKO	49	1
p-aKO	56	0
p-aKO	28	1
p-aKO	35	1
p-aKO	56	0
p-aKO	41	1
p-aKO	45	1
p-aKO	35		1
p-aKO	35		1
p-aKO	45		1
p-aKO	56		0
p-aKO	56		0
p-aKO	56		0
p-aKO	56		0
p-aKO	56		0
p-aKO	56		0
p-aKO	56		0
p-aKO	27		1
p-aKO	56		0
p-aKO	56		0
p-aKO	46			1
p-aKO	56			0
p-aKO	56			0
p-aKO	56			0
p-aKO	56			0
p-aKO	56			0
p-aKO	56			0
p-aKO	56			0
p-aKO	56			0
