# Supplementary material for: Propionyl-CoA carboxylase subunit B regulates anti-tumor T cells in a pancreatic cancer mouse model
Source: eLife. 2025 Mar 11;13:RP96925. doi: 10.7554/eLife.96925 (PMC11896608; doi:10.7554/eLife.96925)
Supplement: Figure 6—source data 1. [file elife-96925-fig6-data1.xlsx]

## Sheet: Sheet1
Clone Size	p-aKO in B6	p-aKO in PD1-/-
1	216	216
2	32	58
3	17	37
4	8	25
5	7	13
6	10	5
7	3	13
8	5	6
9	5	3
10	4	6
11	5	2
12	1	4
13	2	1
14	1	3
15	3	1
16	2	0
17	1	2
18	2	3
19	1	2
20	0	2
21	1	0
22	0	1
24	2	1
25	0	2
26	2	1
27	1	0
29	2	3
30	0	1
31	2	1
32	1	0
33	0	1
34	0	1
35	2	2
38	1	0
41	1	1
42	0	1
43	0	1
45	1	0
46	0	1
48	1	0
49	0	1
51	0	1
52	0	1
61	1	0
66	0	1
70	0	1
72	0	2
89	1	1
91	0	1
97	0	1
106	0	1
108	0	1
111	0	1
126	0	1
138	1	0
147	0	1
218	0	1
262	0	1
324	1	0
380	1	0
386	0	1
501	0	1
676	1	0
