# Supplementary material for: Propionyl-CoA carboxylase subunit B regulates anti-tumor T cells in a pancreatic cancer mouse model
Source: eLife. 2025 Mar 11;13:RP96925. doi: 10.7554/eLife.96925 (PMC11896608; doi:10.7554/eLife.96925)
Supplement: Figure 6—source data 2. [file elife-96925-fig6-data2.xlsx]

## Sheet: p-aKO1
clone	clonotype_id	H11	cdr3s_aa
clone_1_H11	clonotype1H11	694	TRB:CGARDINSYEQYF;TRA:CAVSMTNSGTYQRF
clone_2_H11	clonotype2H11	325	TRB:CASSVGAYAEQFF;TRA:CVLGPSNTNKVVF
clone_3_H11	clonotype3H11	161	TRB:CTCSADPGNYAEQFF;TRA:CALRNGGSNAKLTF
clone_4_H11	clonotype4H11	61	TRB:CASSLDGRGYEQYF;TRA:CAASARDTNAYKVIF
clone_5_H11	clonotype5H11	58	TRB:CARRQSSYEQYF;TRB:CASSAGGGLNERLFF;TRA:CAIDRGGYKLTF
clone_6_H11	clonotype7H11	49	TRB:CASSQDGRTGGGEQYF;TRA:CAGTGNTGKLIF
clone_7_H11	clonotype8H11	46	TRB:CASSQEGRTGNERLFF;TRA:CALTPNNNNAPRF;TRA:CAMRNTEGADRLTF
clone_8_H11	clonotype6H11	45	TRB:CASSLEGWGVNQDTQYF;TRA:CALWELRNTNTGKLTF;TRA:CAMREGPRAGGSNAKLTF;TRA:CAMREGPRAGGSNAKLTF
clone_9_H11	clonotype12H11	32	TRB:CGAREGANNERLFF;TRA:CAASASGSFNKLTF
clone_10_H11	clonotype13H11	30	TRB:CASSQEGRTGSTEVFF;TRA:CALERRTNAYKVIF;TRA:CAVSGNNNNAPRF
clone_11_H11	clonotype15H11	30	TRB:CASSQEVRNQDTQYF;TRA:CILRVANANKMIF
clone_12_H11	clonotype10H11	29	TRB:CASSQTGASAETLYF;TRA:CAAEAMSNYNVLYF
clone_13_H11	clonotype17H11	29	TRB:CASSQAGGYEQYF;TRA:CAVRNNAGAKLTF
clone_14_H11	clonotype9H11	29	TRB:CASSQTGASAETLYF;TRA:CAAEAFSNYNVLYF
clone_15_H11	clonotype16H11	25	TRB:CASSQDGRTGPETLYF;TRA:CALTRNNNNAPRF
clone_16_H11	clonotype11H11	24	TRB:CASSSGGRSAETLYF;TRA:CAAEALSNYNVLYF;TRA:CAMERNTGGLSGKLTF
clone_17_H11	clonotype14H11	24	TRB:CASSPGQTEVFF;TRA:CAMRENGGSGGKLTL;TRA:CAVTLDYANKMIF
clone_18_H11	clonotype21H11	24	TRB:CASSKQGARDQNTLYF;TRB:CASSPLGLQDTQYF;TRA:CAMREGGYSNNRLTL
clone_19_H11	clonotype23H11	22	TRB:CASSPRDLDTQYF;TRA:CAASATGGNNKLTF
clone_20_H11	clonotype26H11	21	TRB:CASSSSGTSAETLYF;TRA:CAAEAMSNYNVLYF
clone_21_H11	clonotype24H11	20	TRB:CASSIEWDQDTQYF;TRA:CAARGGPSSGSWQLIF;TRA:CAASGSSGSWQLIF
clone_22_H11	clonotype18H11	19	TRB:CASSKTGRSAETLYF;TRA:CAAEAMSNYNVLYF
clone_23_H11	clonotype25H11	19	TRB:CASSPLGLQDTQYF
clone_24_H11	clonotype20H11	18	TRB:CASSKTGGVAETLYF;TRA:CAAEEMSNYNVLYF
clone_25_H11	clonotype27H11	18	TRB:CTCSADLRIKSEVFF;TRA:CAATTSSGQKLVF;TRA:CALTFYGSSGNKLIF
clone_26_H11	clonotype31H11	18	TRB:CASGREGRNSPLYF;TRA:CAAERGSSGNKLIF
clone_27_H11	clonotype30H11	17	TRB:CASRRAGADTEVFF;TRA:CATDEDYSNNRLTL;TRA:CAVSAEGGRALIF
clone_28_H11	clonotype19H11	16	TRB:CASSLGRVSGNTLYF;TRA:CALVDPQGGRALIF
clone_29_H11	clonotype22H11	16	TRB:CASGDGNTQYF;TRA:CVRGSALGRLHF
clone_30_H11	clonotype28H11	15	TRB:CASSLDGGGEQYF;TRB:CASSLDGRGYEQYF;TRA:CALRDYTGGNNKLTF
clone_31_H11	clonotype34H11	15	TRB:CASSQEGRTGNERLFF;TRA:CAASRNNNNAPRF;TRA:CAVKTTEGADRLTF
clone_32_H11	clonotype33H11	14	TRB:CASSQEGQGTETLYF;TRA:CAASEGGTNTGKLTF
clone_33_H11	clonotype32H11	13	TRB:CASGDAQSNTEVFF;TRA:CALGNSGTYQRF;TRA:CAVRDGTNTGKLTF
clone_34_H11	clonotype36H11	12	TRB:CASGDLTDTEVFF;TRA:CAANSNNRIFF
clone_35_H11	clonotype37H11	12	TRB:CASSDAAERLFF;TRA:CAVMATGGNNKLTF;TRA:CAVSTTGANTGKLTF
clone_36_H11	clonotype29H11	11	TRB:CASSVGAYAEQFF;TRA:CALGDLGSNNRIFF
clone_37_H11	clonotype40H11	11	TRB:CASSIPGQGAETLYF;TRA:CAAERMSNYNVLYF
clone_38_H11	clonotype44H11	11	TRB:CASSQETSSAETLYF;TRA:CAASEGGSSGNKLIF
clone_39_H11	clonotype38H11	10	TRB:CASSQEGQNTGQLYF;TRA:CAMRGITGNTGKLIF
clone_40_H11	clonotype39H11	10	TRB:CASSQEGWGDEQYF;TRA:CAASEVGDNSKLIW
clone_41_H11	clonotype47H11	10	TRB:CASGDASGGKTLYF;TRA:CALGGPSTNTGKLTF;TRA:CAMERNAGAKLTF
clone_42_H11	clonotype35H11	9	TRB:CASSYGQVVSNERLFF;TRA:CALLRFGDNSKLIW
clone_43_H11	clonotype48H11	9	TRB:CASGREGRNSPLYF;TRA:CAAERGSSGNKLIF
clone_44_H11	clonotype49H11	9	TRB:CASGDDWASSYEQYF;TRA:CAASDGTGNTGKLIF
clone_45_H11	clonotype50H11	9	TRB:CASSFGGHSAETLYF;TRB:CGARGTGPSDYTF;TRA:CAAERMSNYNVLYF
clone_46_H11	clonotype52H11	9	TRB:CASSLDTGDEQYF;TRA:CAASDTNAYKVIF;TRA:CALSETNSAGNKLTF
clone_47_H11	clonotype54H11	9	TRB:CASSQEGRTGDERLFF;TRA:CALGERNNNAPRF
clone_48_H11	clonotype41H11	8	TRB:CASSSGLGGTYEQYF;TRA:CAARVMGYKLTF
clone_49_H11	clonotype42H11	8	TRB:CASSAGQGEQYF;TRA:CAASSGFASALTF
clone_50_H11	clonotype43H11	8	TRB:CASSHRASYEQYF;TRA:CAMEAGSFNKLTF
clone_51_H11	clonotype51H11	8	TRB:CASSDLTGVQDTQYF;TRA:CALGASSSFSKLVF
clone_52_H11	clonotype56H11	8	TRB:CTCSADGGLYAEQFF;TRA:CALRTGGSNAKLTF
clone_53_H11	clonotype59H11	8	TRB:CASSQAQTNTEVFF;TRA:CSANSAGNKLTF
clone_54_H11	clonotype60H11	8	TRB:CASSGQGEDTQYF;TRB:CASSLGRAEQFF;TRB:CASSQTGGVAETLYF;TRB:CTCSGQGNSDYTF;TRA:CAIALNTGNYKYVF
clone_55_H11	clonotype63H11	8	TRB:CASSQEGTGITGQLYF;TRA:CALGDPGNTGKLIF
clone_56_H11	clonotype45H11	7	TRB:CSSSPGTTNSDYTF;TRA:CAVRGGTGNTGKLIF
clone_57_H11	clonotype46H11	7	TRA:CALRDYTGGNNKLTF
clone_58_H11	clonotype53H11	7	TRB:CASSLGQGAETLYF;TRA:CALKTQVVGQLTF
clone_59_H11	clonotype55H11	7	TRB:CASSKQGARDQNTLYF;TRB:CASSPLGLQDTQYF;TRA:CAMREGGYSNNRLTL
clone_60_H11	clonotype61H11	7	TRB:CASSQTGGQDTQYF;TRB:CASTGQGSNERLFF;TRA:CALSDDSNNRIFF
clone_61_H11	clonotype64H11	7	TRB:CASSLEGGLSEQYF;TRA:CALGEGGSNAKLTF;TRA:CVLAPNNNAGAKLTF
clone_62_H11	clonotype66H11	7	TRB:CASSMGGTEVFF;TRA:CAAGETEGADRLTF;TRA:CAVRNTGYQNFYF
clone_63_H11	clonotype62H11	6	TRB:CASSDQGANYAEQFF;TRA:CAVGTGGYKVVF
clone_64_H11	clonotype67H11	6	TRB:CASSLAGGNEQYF;TRA:CALSVFTGGNNKLTF
clone_65_H11	clonotype68H11	6	TRB:CASSWTGANTGQLYF;TRA:CAVSRNSNNRIFF
clone_66_H11	clonotype69H11	6	TRB:CASSRGTGGYEQYF
clone_67_H11	clonotype70H11	6	TRB:CASSQDGRNSGNTLYF;TRA:CALSPGYNKLTF;TRA:CALWERISGTYQRF
clone_68_H11	clonotype72H11	6	TRB:CASSGEGAAPLYF;TRA:CASQTGNTGKLIF
clone_69_H11	clonotype74H11	6	TRB:CASSPNTEVFF;TRA:CAAEDNYAQGLTF
clone_70_H11	clonotype76H11	6	TRB:CASSFTENYAEQFF;TRA:CAMNNYAQGLTF
clone_71_H11	clonotype79H11	6	TRB:CASSLTGVSAETLYF;TRA:CVPGAGNTGKLIF
clone_72_H11	clonotype83H11	6	TRB:CASSSSPRDRNTGQLYF;TRA:CAAPSYSNNRIFF
clone_73_H11	clonotype100H11	5	TRB:CASSIVGADTGQLYF;TRA:CAVKDSNYQLIW
clone_74_H11	clonotype101H11	5	TRB:CASAGNSDYTF;TRB:CASGGDWGGAEQFF;TRA:CILRVARENTGYQNFYF
clone_75_H11	clonotype75H11	5	TRB:CASSQDWGGYEQYF;TRA:CAASEANTGKLTF
clone_76_H11	clonotype77H11	5	TRB:CASSLGGSSAETLYF;TRB:CTCSAVPGLGASQNTLYF;TRA:CAAERMSNYNVLYF;TRA:CVVGATSSGQKLVF
clone_77_H11	clonotype82H11	5	TRB:CASSQAGQGAGTEVFF;TRA:CALSGGGLSGKLTF
clone_78_H11	clonotype84H11	5	TRB:CASGDAAANSDYTF;TRB:CASSERDRGGEQYF;TRA:CALEHNAGAKLTF
clone_79_H11	clonotype86H11	5	TRB:CASGEARGYNSPLYF;TRA:CALSLTSGGNYKPTF
clone_80_H11	clonotype87H11	5	TRB:CASSGRDNTEVFF;TRB:CASSLEDRGRNTEVFF;TRA:CALERNAGAKLTF
clone_81_H11	clonotype89H11	5	TRB:CASSQDNNQDTQYF;TRA:CALSDRGYKVVF
clone_82_H11	clonotype94H11	5	TRB:CASSTVLSAETLYF;TRA:CAALINTGNYKYVF;TRA:CSASISNYQLIW
clone_83_H11	clonotype95H11	5	TRB:CASSQDLGGRGQNTLYF;TRA:CATGGNNKLTF
clone_84_H11	clonotype96H11	5	TRB:CTCSAAGHNQAPLF;TRA:CAAPSGGSNAKLTF
clone_85_H11	clonotype97H11	5	TRB:CASSLGEDTEVFF;TRA:CAANVGDNSKLIW
clone_86_H11	clonotype105H11	4	TRB:CASGREGRNSPLYF;TRA:CAAERGSSGNKLIF
clone_87_H11	clonotype106H11	4	TRB:CASSQEQGNERLFF;TRA:CALGVRNNNNAPRF;TRA:CAVSANAGSGGKLTL
clone_88_H11	clonotype112H11	4	TRB:CASRPPGQGAGDTGQLYF;TRB:CASRRLGGRDTQYF;TRA:CAASENQGGRALIF
clone_89_H11	clonotype113H11	4	TRB:CASSQEGRTGDERLFF;TRB:CASSRVSAETLYF;TRA:CAASASNNNAPRF
clone_90_H11	clonotype114H11	4	TRB:CASSRDWGIQNTLYF;TRA:CAMRNQGGSAKLIF
clone_91_H11	clonotype116H11	4	TRB:CASSADWGNYAEQFF;TRB:CASSLLDAEQFF;TRA:CVLSDSNYQLIW
clone_92_H11	clonotype65H11	4	TRB:CTCSAAKANSDYTF;TRA:CAASPNYNQGKLIF;TRA:CVLSAGFASALTF
clone_93_H11	clonotype78H11	4	TRB:CASSFEGGGNTLYF;TRA:CALRNSNNRIFF;TRA:CALRNYNQGKLIF;TRA:CALRNYNQGKLIF
clone_94_H11	clonotype80H11	4	TRB:CASSQEGTGGAETLYF;TRA:CAAGEQGTGSKLSF
clone_95_H11	clonotype81H11	4	TRB:CASSPDWGNYAEQFF;TRA:CAVSARTNKVVF;TRA:CAVSMDTEGADRLTF
clone_96_H11	clonotype88H11	4	TRB:CASSQDWGGYEQYF;TRA:CAASEANTGKLTF;TRA:CVLSAEGNYAQGLTF
clone_97_H11	clonotype91H11	4	TRB:CASSFGTKDTQYF;TRB:CSSRAGGQDTQYF;TRA:CALGRNSNNRIFF
clone_98_H11	clonotype92H11	4	TRB:CASSLGLSYEQYF;TRA:CALSPGYNKLTF;TRA:CAMREGTSSGQKLVF
clone_99_H11	clonotype93H11	4	TRB:CASSQESPASAETLYF;TRA:CATDTGGYKVVF
clone_100_H11	clonotype99H11	4	TRB:CASSIWGGYAEQFF;TRA:CAASDTGANTGKLTF
clone_101_H11	clonotype102H11	3	TRB:CASGDARGYNSPLYF;TRA:CAASEGGGLSGKLTF
clone_102_H11	clonotype103H11	3	TRB:CAISTGGNTGQLYF;TRA:CVPPVSNYNVLYF
clone_103_H11	clonotype104H11	3	TRB:CASSFSNQAPLF;TRA:CAPPREGYKVVF
clone_104_H11	clonotype109H11	3	TRB:CASSPRLGGDEQYF;TRA:CAGFNTGNYKYVF;TRA:CALSVNSGGSNAKLTF
clone_105_H11	clonotype111H11	3	TRB:CASSPRDRETEVFF;TRA:CAVSPYYNQGKLIF
clone_106_H11	clonotype118H11	3	TRB:CASSLGRASGNTLYF;TRA:CALVETQGGRALIF
clone_107_H11	clonotype120H11	3	TRB:CASSLLGGYNYAEQFF;TRA:CAMREGSGSNNRLTL
clone_108_H11	clonotype121H11	3	TRB:CASGDAWGRDTQYF;TRA:CALILQGGSAKLIF
clone_109_H11	clonotype123H11	3	TRB:CASSDGQYEQYF;TRB:CASSPQKIQDTQYF;TRA:CAASASSSFSKLVF
clone_110_H11	clonotype124H11	3	TRB:CSSRAGGQDTQYF;TRA:CALRGGGNKVVF
clone_111_H11	clonotype125H11	3	TRB:CASSADWGNYAEQFF;TRB:CASSGQGGSTEVFF;TRB:CGVGTGGNSDYTF;TRA:CAMRENTGGYKVVF
clone_112_H11	clonotype127H11	3	TRB:CGARARQDTEVFF;TRB:CGAREAGGFEQYF;TRA:CAARNSGSWQLIF
clone_113_H11	clonotype128H11	3	TRB:CGARDWGGQDTQYF;TRA:CAAEAGYNQGKLIF
clone_114_H11	clonotype130H11	3	TRB:CASSQETGGGNTLYF;TRA:CARDVGDNSKLIW
clone_115_H11	clonotype131H11	3	TRB:CASGREGRNSPLYF;TRA:CAAERGSSGNKLIF
clone_116_H11	clonotype134H11	3	TRB:CASSPGSAETLYF;TRA:CAASEPGLSGKLTF
clone_117_H11	clonotype136H11	3	TRB:CASGDARGYNSPLYF;TRA:CALRNYNQGKLIF;TRA:CAVYSNNRLTL
clone_118_H11	clonotype137H11	3	TRB:CASGEARGYNSPLYF;TRA:CALSLTSGGNYKPTF
clone_119_H11	clonotype139H11	3	TRB:CASNWGGDTQYF;TRB:CASSPWGASYEQYF;TRA:CALAYSNNRIFF
clone_120_H11	clonotype142H11	3	TRB:CASSLEQGSTEVFF;TRA:CAASKKSGGSNAKLTF;TRA:CAASMRPEGADRLTF
clone_121_H11	clonotype144H11	3	TRB:CASSRDRGPDTQYF;TRA:CALSVQGTGSKLSF
clone_122_H11	clonotype145H11	3	TRB:CTCSADIRGKDTQYF;TRA:CAVSDNNYAQGLTF
clone_123_H11	clonotype147H11	3	TRB:CASSIDRGHTGQLYF;TRA:CALSDHRGDNYAQGLTF
clone_124_H11	clonotype148H11	3	TRB:CASGDAQSNTEVFF;TRA:CALGNSGTYQRF;TRA:CAVRDGTNTGKLTF
clone_125_H11	clonotype149H11	3	TRB:CASSLPGHEQYF;TRA:CAAEALSNYNVLYF
clone_126_H11	clonotype151H11	3	TRB:CASGDAAANSDYTF;TRA:CALEHNAGAKLTF
clone_127_H11	clonotype58H11	3	TRB:CASSQEGRNERLFF;TRA:CAAGETEGADRLTF
clone_128_H11	clonotype73H11	3	TRB:CASSAGQGDTQYF;TRB:CGASGRGDTQYF;TRA:CAVSRGNEKITF
clone_129_H11	clonotype85H11	3	TRB:CASSLAGGRVTEVFF;TRB:CASSQANTEVFF;TRA:CALWTGYQNFYF
clone_130_H11	clonotype90H11	3	TRB:CASSRLGVYAEQFF;TRA:CAVSENYAQGLTF
clone_131_H11	clonotype98H11	3	TRB:CTCSAVRGRGDTQYF;TRA:CALSMGGSNAKLTF
clone_132_H11	clonotype107H11	2	TRB:CTCRDNQDTQYF;TRA:CAMEMGYKLTF
clone_133_H11	clonotype108H11	2	TRB:CASSSQGPNYAEQFF;TRA:CAPGTGGYKVVF;TRA:CAVRELAGNKLTF
clone_134_H11	clonotype110H11	2	TRB:CASSQEGQNTGQLYF;TRA:CALTRNNNNAPRF;TRA:CAMRVITGNTGKLIF
clone_135_H11	clonotype117H11	2	TRB:CASSPDRRDTQYF;TRB:CASSTVGLGVWEQYF;TRA:CALSDRDTNAYKVIF
clone_136_H11	clonotype119H11	2	TRB:CASSFTGKEVFF;TRB:CTCSAWASQNTLYF;TRA:CALSHTGSGGKLTL
clone_137_H11	clonotype122H11	2	TRB:CASGEGDTYAEQFF;TRA:CAADNMGYKLTF
clone_138_H11	clonotype126H11	2	TRB:CAWKGTGNQAPLF;TRA:CSASKTGGYKVVF
clone_139_H11	clonotype129H11	2	TRB:CASSDAWDTGQLYF;TRA:CAASRSSNNRIFF
clone_140_H11	clonotype133H11	2	TRB:CASSLTDTEVFF;TRA:CVLRSGGSNAKLTF
clone_141_H11	clonotype138H11	2	TRB:CASSQEGGSNERLFF;TRA:CAVSAGTGSNRLTF
clone_142_H11	clonotype141H11	2	TRB:CTCSYWGGYEQYF;TRA:CALRRNSNNRIFF
clone_143_H11	clonotype143H11	2	TRB:CTCSLGGRYAEQFF;TRA:CALSPGGSNAKLTF
clone_144_H11	clonotype146H11	2	TRB:CASSIEGTNAEQFF;TRA:CVLSGASSGQKLVF
clone_145_H11	clonotype150H11	2	TRB:CASGDSGNTLYF;TRA:CAAWYQGGSAKLIF
clone_146_H11	clonotype152H11	2	TRB:CASSPTGGWNTQYF;TRA:CAVSVNYGNEKITF
clone_147_H11	clonotype153H11	2	TRB:CASGDARGYNSPLYF;TRB:CASSGLGVSAETLYF;TRA:CALRNYNQGKLIF;TRA:CAVYSNNRLTL
clone_148_H11	clonotype154H11	2	TRB:CASGDARGYNSPLYF;TRA:CAVSEHRGGSGGKLTL
clone_149_H11	clonotype155H11	2	TRB:CASSLYGQGYAEQFF;TRA:CAASGTNTNKVVF;TRA:CALGPNTGYQNFYF
clone_150_H11	clonotype156H11	2	TRB:CGATGGAEVFF;TRB:CGAWTGGNSDYTF;TRA:CAADGGSALGRLHF
clone_151_H11	clonotype158H11	2	TRB:CASSIVGLGSAETLYF;TRA:CALNSNNRIFF
clone_152_H11	clonotype159H11	2	TRB:CASQQESQNTLYF;TRA:CAAEATGGYKVVF
clone_153_H11	clonotype160H11	2	TRB:CASSSDWRRYF;TRA:CAADGGSNYKLTF
clone_154_H11	clonotype162H11	2	TRB:CASSAGYNQAPLF;TRA:CAVDTNAYKVIF
clone_155_H11	clonotype163H11	2	TRB:CASSAGLGGNTGQLYF;TRB:CGARVGGDQDTQYF;TRA:CAAPRGSSGNKLIF;TRA:CALSDSNNRIFF
clone_156_H11	clonotype164H11	2	TRB:CASSGRSNYAEQFF;TRA:CAVSVSSNTNKVVF
clone_157_H11	clonotype165H11	2	TRB:CASSDQGGQNTLYF;TRA:CALGDRNTGYQNFYF
clone_158_H11	clonotype166H11	2	TRB:CGARDWGNTGQLYF;TRA:CAMREGRNTEGADRLTF
clone_159_H11	clonotype167H11	2	TRB:CAWSQEGQGSERLFF;TRA:CALSPSAGNKLTF
clone_160_H11	clonotype168H11	2	TRB:CASSHRNTEVFF;TRA:CAAWGTEGADRLTF
clone_161_H11	clonotype169H11	2	TRB:CASSDKANTGQLYF;TRA:CAASEGGSSGNKLIF;TRA:CAVSNTNKVVF
clone_162_H11	clonotype171H11	2	TRB:CASSQEGWGDTQYF;TRA:CALGNAGAKLTF;TRA:CIVTDGGRGSALGRLHF
clone_163_H11	clonotype172H11	2	TRB:CASGDAQSNTEVFF;TRA:CALGNSGTYQRF;TRA:CAVRDGTNTGKLTF
clone_164_H11	clonotype173H11	2	TRB:CASSQGGDNQAPLF;TRA:CAASPNNNAPRF
clone_165_H11	clonotype175H11	2	TRB:CASSPTGGGDGQYF;TRA:CALSDDSNNRIFF
clone_166_H11	clonotype176H11	2	TRB:CASSRGTFNQDTQYF;TRA:CAAKESNYQLIW
clone_167_H11	clonotype177H11	2	TRB:CASSDPDSGNTLYF;TRA:CALGNMGYKLTF
clone_168_H11	clonotype178H11	2	TRB:CASSLANQDTQYF;TRA:CAASANYNQGKLIF
clone_169_H11	clonotype180H11	2	TRB:CASSRLGEDTQYF;TRA:CAASKDSAGNKLTF
clone_170_H11	clonotype181H11	2	TRB:CTCSAQYAEQFF;TRA:CALGDPGSWQLIF
clone_171_H11	clonotype184H11	2	TRB:CASSLLGVYAEQFF;TRA:CAVSENYAQGLTF
clone_172_H11	clonotype185H11	2	TRB:CASSWGSSAETLYF;TRA:CALRGSNYNVLYF
clone_173_H11	clonotype189H11	2	TRB:CASSHQGGNYAEQFF;TRA:CASGSFNKLTF
clone_174_H11	clonotype192H11	2	TRB:CASSQVGGAGQNTLYF;TRA:CAASMDNTNKVVF
clone_175_H11	clonotype193H11	2	TRB:CASSLALGDYEQYF;TRA:CAAAYQGGRALIF;TRA:CAVSRNNTNTGKLTF
clone_176_H11	clonotype194H11	2	TRB:CASSLERGNSDYTF;TRA:CALSAITGNTGKLIF
clone_177_H11	clonotype195H11	2	TRB:CASSPRLGRYAEQFF;TRA:CAASMEPGGYKVVF
clone_178_H11	clonotype196H11	2	TRB:CASTPGLGGYEQYF;TRA:CAAATGGYKVVF;TRA:CAASRGNSNNRIFF
clone_179_H11	clonotype197H11	2	TRB:CASSPRAGRDSDYTF;TRB:CASSPRGSNERLFF;TRA:CALGDGNYAQGLTF
clone_180_H11	clonotype198H11	2	TRB:CASSQDGRTGGRTLYF;TRA:CAASAPNTNKVVF;TRA:CAVSASSNTNKVVF
clone_181_H11	clonotype199H11	2	TRB:CASSQGRANTEVFF;TRA:CASTPTGGNNKLTF
clone_182_H11	clonotype200H11	2	TRB:CASSLAGENSPLYF;TRA:CAASITGNTGKLIF
clone_183_H11	clonotype201H11	2	TRB:CSSRDGDRGYEQYF;TRA:CAVSAYQGGRALIF
clone_184_H11	clonotype203H11	2	TRB:CASSRPGQSAETLYF;TRA:CAAGTGGYKVVF
clone_185_H11	clonotype204H11	2	TRB:CTCSVRDRGYEQYF;TRA:CAARNYGNEKITF
clone_186_H11	clonotype205H11	2	TRB:CASSLEAGLVDTQYF;TRA:CALRSGSFNKLTF
clone_187_H11	clonotype206H11	2	TRB:CASSLDAGGQDTQYF;TRA:CALGSYGSSGNKLIF
clone_188_H11	clonotype208H11	2	TRB:CASSIRGANSDYTF;TRA:CVLSPWNSNNRIFF
clone_189_H11	clonotype209H11	2	TRB:CASSQRTFGNTLYF;TRA:CALGGPLNYAQGLTF
clone_190_H11	clonotype210H11	2	TRB:CTCSGTGGNYAEQFF;TRA:CVLSAKGKGNTGKLIF
clone_191_H11	clonotype211H11	2	TRB:CASSQDWGTYEQYF;TRA:CAASRNNAGAKLTF
clone_192_H11	clonotype212H11	2	TRB:CASGDGLF;TRA:CAVSLVGYKLTF
clone_193_H11	clonotype213H11	2	TRB:CASSPPGQTNERLFF;TRA:CAAPPPPGGNYKPTF;TRA:CAARVGGSALGRLHF
clone_194_H11	clonotype214H11	2	TRB:CASGREGRNSPLYF;TRA:CAAERGSSGNKLIF
clone_195_H11	clonotype215H11	2	TRB:CASSLEYEQYF;TRA:CAASAGGNNKLTF
clone_196_H11	clonotype216H11	2	TRB:CASSPRGEQYF;TRA:CALSTPGGNYKPTF
clone_197_H11	clonotype217H11	2	TRB:CASSLEYEQYF;TRA:CAASSGGNNKLTF
clone_198_H11	clonotype218H11	2	TRB:CASGDGSGNSDYTF;TRB:CASSPGQGAEQFF;TRA:CAWNYNQGKLIF
clone_199_H11	clonotype221H11	2	TRB:CASGDALGGREQYF;TRA:CAVSLWLTGNTGKLIF
clone_200_H11	clonotype223H11	2	TRB:CASSSDWDSYEQYF;TRA:CASFNNRIFF
clone_201_H11	clonotype224H11	2	TRB:CASGDAGQGSDYTF;TRA:CALERNAGAKLTF
clone_202_H11	clonotype225H11	2	TRB:CASGDALGGAEQFF;TRA:CAASMNYNQGKLIF
clone_203_H11	clonotype228H11	2	TRB:CASGENRGYNSPLYF;TRA:CAVSKNTGGLSGKLTF
clone_204_H11	clonotype230H11	2	TRB:CASGDPGGATDTQYF;TRA:CALERTGGYKVVF
clone_205_H11	clonotype232H11	2	TRB:CASGDLGGRRQDTQYF;TRA:CALSATPRGSAKLIF
clone_206_H11	clonotype57H11	2	TRB:CASSLEGWGVNQDTQYF
clone_207_H11	clonotype71H11	2	TRB:CASSPSGGYEQYF;TRA:CATGFASALTF
clone_208_H11	clonotype1000H11	1	TRB:CASSLGQGTEVFF;TRA:CAMREPDTNAYKVIF
clone_209_H11	clonotype1002H11	1	TRB:CASGDLGGSYEQYF;TRA:CALSDWDGSSGNKLIF
clone_210_H11	clonotype1003H11	1	TRB:CTCSAAISQNTLYF;TRB:CTCSTQDTQYF;TRA:CALSALPDSGYNKLTF
clone_211_H11	clonotype1004H11	1	TRB:CASSSAPYEQYF;TRA:CALGDHPGTGSNRLTF
clone_212_H11	clonotype1005H11	1	TRB:CASSPGGGAETLYF;TRB:CASSSGEDTQYF;TRA:CAANSGTYQRF
clone_213_H11	clonotype1006H11	1	TRB:CASSDQGRSAEQFF;TRA:CAAQGGSAKLIF
clone_214_H11	clonotype1008H11	1	TRB:CASSQRGDQNTLYF;TRA:CAASPLAQGLTF
clone_215_H11	clonotype1009H11	1	TRB:CASSLQGSNERLFF;TRA:CAATSSNTNKVVF
clone_216_H11	clonotype1011H11	1	TRB:CASSRGNTGQLYF;TRA:CAMRERDYGSSGNKLIF
clone_217_H11	clonotype1012H11	1	TRB:CASRQDSYEQYF;TRA:CAAASSGSWQLIF
clone_218_H11	clonotype1013H11	1	TRB:CASSPQGSEQYF;TRA:CAGNNAGAKLTF
clone_219_H11	clonotype1014H11	1	TRB:CASSLDTSAETLYF;TRA:CAATDTNTGKLTF
clone_220_H11	clonotype1015H11	1	TRB:CASSDTGGGHTQYF;TRA:CAASGTNTGKLTF
clone_221_H11	clonotype1016H11	1	TRB:CASGVGTANTEVFF;TRA:CAASGSNYNVLYF
clone_222_H11	clonotype1017H11	1	TRB:CASSPPGSTGQLYF;TRA:CAASAIGSAGNKLTF
clone_223_H11	clonotype1018H11	1	TRB:CASSNGLGVYEQYF;TRA:CAAVPGDYAQGLTF
clone_224_H11	clonotype1019H11	1	TRB:CASSGDPGRDTLYF;TRA:CALWELGGYKVVF
clone_225_H11	clonotype1020H11	1	TRB:CASSEGTGKGETLYF;TRA:CAASVVNTGNYKYVF
clone_226_H11	clonotype1021H11	1	TRB:CASSDALGRDAEQFF;TRA:CAASENYSNNRLTL
clone_227_H11	clonotype1022H11	1	TRB:CASNDRDQDTQYF;TRA:CAASDPGANTGKLTF
clone_228_H11	clonotype1023H11	1	TRB:CASSLTRNTEVFF;TRA:CAASGSGGSNAKLTF
clone_229_H11	clonotype1024H11	1	TRB:CASSQEAGGYEQYF;TRA:CAASEDGGLSGKLTF
clone_230_H11	clonotype1025H11	1	TRB:CASSQDFRNTEVFF;TRA:CAASSNSGGSNAKLTF
clone_231_H11	clonotype1026H11	1	TRB:CASSERQGGDTEVFF;TRA:CAASVRGSALGRLHF
clone_232_H11	clonotype1027H11	1	TRB:CASSYWGDTQYF;TRA:CAASPNTGANTGKLTF
clone_233_H11	clonotype1028H11	1	TRB:CASSQDLGGYTQYF;TRA:CALSDPAGGSAKLIF
clone_234_H11	clonotype1029H11	1	TRA:CAASATASLGKLQF
clone_235_H11	clonotype1031H11	1	TRA:CAVMGASGSWQLIF
clone_236_H11	clonotype1033H11	1	TRA:CAASTSGGNYKPTF
clone_237_H11	clonotype1035H11	1	TRA:CAASSGSALGRLHF
clone_238_H11	clonotype1036H11	1	TRA:CAASWAEGADRLTF
clone_239_H11	clonotype1037H11	1	TRA:CAARDNTNTGKLTF
clone_240_H11	clonotype1038H11	1	TRB:CASSIRDTQYF
clone_241_H11	clonotype1039H11	1	TRA:CVLGDRNAGAKLTF
clone_242_H11	clonotype1040H11	1	TRA:CAASSNNNAPRF
clone_243_H11	clonotype1041H11	1	TRA:CAMGTGGLSGKLTF
clone_244_H11	clonotype1042H11	1	TRA:CAMERNTGANTGKLTF
clone_245_H11	clonotype1043H11	1	TRB:CASTLRGGRAEQFF
clone_246_H11	clonotype1045H11	1	TRB:CASSPLGGLAEQFF
clone_247_H11	clonotype1047H11	1	TRB:CASSDRGGNTEVFF
clone_248_H11	clonotype1048H11	1	TRB:CASSLEGAGTEVFF
clone_249_H11	clonotype1049H11	1	TRB:CASSLDRGQDTQYF
clone_250_H11	clonotype1050H11	1	TRB:CASSFRGSQNTLYF
clone_251_H11	clonotype1051H11	1	TRB:CASSFGGSAETLYF
clone_252_H11	clonotype1052H11	1	TRB:CASSQETGGQNTLYF
clone_253_H11	clonotype1054H11	1	TRB:CASSQEGQNTGQLYF
clone_254_H11	clonotype1055H11	1	TRB:CASSQEGQNTGQLYF
clone_255_H11	clonotype1056H11	1	TRB:CASSQEGQNTGQLYF
clone_256_H11	clonotype1057H11	1	TRB:CASSQEGQNTGQLYF
clone_257_H11	clonotype1058H11	1	TRB:CASSQEGGSNERLFF
clone_258_H11	clonotype1059H11	1	TRB:CASSQEGGSNERLFF
clone_259_H11	clonotype1060H11	1	TRB:CASSQEGGSNERLFF
clone_260_H11	clonotype1061H11	1	TRB:CASSQEGGSNERLFF
clone_261_H11	clonotype1062H11	1	TRB:CASSQDEGQNTEVFF
clone_262_H11	clonotype1064H11	1	TRB:CASSQGGGRYAEQFF
clone_263_H11	clonotype1065H11	1	TRB:CASSLMTDNYAEQFF
clone_264_H11	clonotype1067H11	1	TRA:CAAWYQGGSAKLIF
clone_265_H11	clonotype1068H11	1	TRA:CALSGATGYQNFYF
clone_266_H11	clonotype1069H11	1	TRA:CALIATSSGQKLVF
clone_267_H11	clonotype1070H11	1	TRA:CAVSAMRNNRIFF
clone_268_H11	clonotype1071H11	1	TRA:CAVSRGGNYKPTF
clone_269_H11	clonotype1072H11	1	TRA:CALTGSAGNKLTF
clone_270_H11	clonotype1073H11	1	TRA:CAVSANYGNEKITF
clone_271_H11	clonotype1074H11	1	TRB:CAWSLTGGGSQDTQYF
clone_272_H11	clonotype1075H11	1	TRB:CAWSLAAGANTGQLYF
clone_273_H11	clonotype1076H11	1	TRB:CASRRDSQDTQYF
clone_274_H11	clonotype1077H11	1	TRB:CASSTGDSYEQYF
clone_275_H11	clonotype1079H11	1	TRB:CASSPGRNSPLYF
clone_276_H11	clonotype1080H11	1	TRB:CASSLGQFWQLYF
clone_277_H11	clonotype1081H11	1	TRB:CASSSGSSYEQYF
clone_278_H11	clonotype1083H11	1	TRB:CASSLQANTEVFF
clone_279_H11	clonotype1085H11	1	TRB:CASSLDGADTQYF
clone_280_H11	clonotype1086H11	1	TRB:CASSLGSGNTLYF
clone_281_H11	clonotype1087H11	1	TRB:CASSLVRGREQYF
clone_282_H11	clonotype1088H11	1	TRB:CASSLVLNERLFF
clone_283_H11	clonotype1089H11	1	TRB:CASSLTTNSDYTF
clone_284_H11	clonotype1090H11	1	TRB:CASSRELGGDEQYF
clone_285_H11	clonotype1091H11	1	TRB:CASSRRLGYAEQFF
clone_286_H11	clonotype1092H11	1	TRB:CASSSRTGVDTQYF
clone_287_H11	clonotype1093H11	1	TRB:CASRGQANTEVFF
clone_288_H11	clonotype1094H11	1	TRB:CASSPRQYAEQFF
clone_289_H11	clonotype1095H11	1	TRB:CASSPRQENTLYF
clone_290_H11	clonotype1096H11	1	TRB:CASSLDWQNTLYF
clone_291_H11	clonotype1097H11	1	TRB:CASSLEGHYEQYF
clone_292_H11	clonotype1098H11	1	TRB:CASSLDEDTEVFF
clone_293_H11	clonotype1099H11	1	TRB:CASSLGSQNTLYF
clone_294_H11	clonotype1100H11	1	TRB:CASSFRDKDTQYF
clone_295_H11	clonotype1101H11	1	TRB:CASSFRDSYEQYF
clone_296_H11	clonotype1102H11	1	TRB:CASSFAGNTEVFF
clone_297_H11	clonotype1103H11	1	TRB:CASSLAGGNEQYF
clone_298_H11	clonotype1104H11	1	TRB:CASSLAGGNEQYF
clone_299_H11	clonotype1105H11	1	TRB:CASRWGGQDTQYF
clone_300_H11	clonotype1106H11	1	TRB:CASRGTIQDTQYF
clone_301_H11	clonotype1107H11	1	TRB:CASSLPGGYEQYF
clone_302_H11	clonotype1108H11	1	TRB:CASSLGGRVEQYF
clone_303_H11	clonotype1109H11	1	TRB:CASSQDSAETLYF
clone_304_H11	clonotype1110H11	1	TRB:CASSQGAGNTLYF
clone_305_H11	clonotype1111H11	1	TRB:CASSQGGQNTLYF
clone_306_H11	clonotype1112H11	1	TRB:CASSLQGRTEVFF
clone_307_H11	clonotype1113H11	1	TRB:CASSLGLSYEQYF
clone_308_H11	clonotype1114H11	1	TRB:CASSRQNYAEQFF
clone_309_H11	clonotype1115H11	1	TRB:CASSPRLGYEQYF
clone_310_H11	clonotype1117H11	1	TRB:CASNPGLGVEQYF
clone_311_H11	clonotype1118H11	1	TRB:CASSLRDRGQVFF
clone_312_H11	clonotype1120H11	1	TRB:CASSAGSQNTLYF
clone_313_H11	clonotype1121H11	1	TRB:CASSWGGQDTQYF
clone_314_H11	clonotype1122H11	1	TRB:CASSPGTEETLYF
clone_315_H11	clonotype1123H11	1	TRB:CASSRDRAETLYF
clone_316_H11	clonotype1124H11	1	TRB:CASSFGTKDTQYF
clone_317_H11	clonotype1125H11	1	TRB:CASSLGVNTEVFF
clone_318_H11	clonotype1126H11	1	TRB:CASSFYNYAEQFF
clone_319_H11	clonotype1127H11	1	TRB:CASSFSGGAEQYF
clone_320_H11	clonotype1128H11	1	TRB:CASKELGGNQNTLYF
clone_321_H11	clonotype1131H11	1	TRB:CASSGIRFSNERLFF
clone_322_H11	clonotype1132H11	1	TRB:CASSPTGGAPGQLYF
clone_323_H11	clonotype1133H11	1	TRB:CASSEGDRGTGQLYF
clone_324_H11	clonotype1134H11	1	TRB:CASSDLTGVQDTQYF
clone_325_H11	clonotype1135H11	1	TRB:CASSDLTGVQDTQYF
clone_326_H11	clonotype1137H11	1	TRB:CASSDAGGSGNTLYF
clone_327_H11	clonotype1138H11	1	TRB:CASSDGTGPNERLFF
clone_328_H11	clonotype1139H11	1	TRB:CASSDSGQVQNTLYF
clone_329_H11	clonotype1141H11	1	TRB:CASSGGGRVQNTLYF
clone_330_H11	clonotype1142H11	1	TRB:CASSGLGGNTGQLYF
clone_331_H11	clonotype1143H11	1	TRB:CASSVLGANTGQLYF
clone_332_H11	clonotype1144H11	1	TRB:CASAGPGQGDTEVFF
clone_333_H11	clonotype1146H11	1	TRB:CASGDAAGSNSDYTF
clone_334_H11	clonotype1147H11	1	TRB:CASGASGGSSYEQYF
clone_335_H11	clonotype1149H11	1	TRB:CASSDLGGLFSYEQYF
clone_336_H11	clonotype1150H11	1	TRB:CASSQVRDDTEVFF
clone_337_H11	clonotype1151H11	1	TRB:CASSQVGSQNTLYF
clone_338_H11	clonotype1152H11	1	TRB:CAIGRGGHAETLYF
clone_339_H11	clonotype1153H11	1	TRB:CASSPGLGGQEQYF
clone_340_H11	clonotype1154H11	1	TRB:CASSRLGNYAEQFF
clone_341_H11	clonotype1155H11	1	TRB:CASSRRLGDDTQYF
clone_342_H11	clonotype1156H11	1	TRB:CASSYSGGPSEQYF
clone_343_H11	clonotype1157H11	1	TRB:CASSSGLGQDTQYF
clone_344_H11	clonotype1158H11	1	TRB:CASSSQGHAETLYF
clone_345_H11	clonotype1159H11	1	TRB:CASSFQGSQNTLYF
clone_346_H11	clonotype115H11	1	TRB:CASSLYATTNSDYTF;TRA:CASGTGGYKVVF
clone_347_H11	clonotype1160H11	1	TRB:CASSFQGARAEQFF
clone_348_H11	clonotype1161H11	1	TRB:CSSSPGQFYEQYF
clone_349_H11	clonotype1162H11	1	TRB:CTCKRSQDTQYF
clone_350_H11	clonotype1163H11	1	TRB:CTCSPSTDTQYF
clone_351_H11	clonotype1164H11	1	TRB:CTCSANRVEQYF
clone_352_H11	clonotype1165H11	1	TRB:CTCSAHFYEQYF
clone_353_H11	clonotype1166H11	1	TRB:CTCSAGQTEVFF
clone_354_H11	clonotype1167H11	1	TRB:CTCSALRTEVFF
clone_355_H11	clonotype1168H11	1	TRB:CTCSVTEYEQYF
clone_356_H11	clonotype1169H11	1	TRB:CGARDHSGGARAEQFF
clone_357_H11	clonotype1170H11	1	TRB:CGARDPVRASAETLYF
clone_358_H11	clonotype1172H11	1	TRB:CASSRGRGTNTEVFF;TRA:CALSAYGNEKITF;TRA:CVPGDYKYVF
clone_359_H11	clonotype1173H11	1	TRB:CASSLRGEDTQYF;TRA:CILRDNNNAPRF
clone_360_H11	clonotype1174H11	1	TRB:CASSPGGANTLYF;TRB:CASSTGGRNEQYF;TRA:CAAGQQGTGSKLSF;TRA:CATDSNNRIFF
clone_361_H11	clonotype1175H11	1	TRB:CASSDGESSAETLYF;TRA:CAINAYKVIF
clone_362_H11	clonotype1176H11	1	TRB:CASGEARGYNSPLYF;TRB:CASSLSGTIYEQYF;TRA:CALSLTSGGNYKPTF;TRA:CILHTGYQNFYF
clone_363_H11	clonotype1177H11	1	TRB:CASSDAWTGDSYEQYF;TRB:CASSPDRDANSDYTF;TRA:CAISNNRIFF;TRA:CALSDLTQVVGQLTF
clone_364_H11	clonotype1178H11	1	TRB:CASGTFSAETLYF;TRA:CALGAGAKLTF
clone_365_H11	clonotype1179H11	1	TRB:CASRGDRSNTEVFF;TRA:CAKGGSAKLIF
clone_366_H11	clonotype1180H11	1	TRB:CASSFGGDAEQFF;TRA:CATEAGGYKVVF
clone_367_H11	clonotype1181H11	1	TRB:CASSDDHPPSAETLYF;TRB:CASSPSGTGDQAPLF;TRA:CATGHSGTYQRF
clone_368_H11	clonotype1182H11	1	TRB:CASSQRGSGNTLYF;TRA:CILRQGTGSKLSF
clone_369_H11	clonotype1184H11	1	TRB:CASSQRTGSSYEQYF;TRA:CAAEANYNVLYF
clone_370_H11	clonotype1185H11	1	TRB:CASSWTNNQAPLF;TRA:CAVGTNAYKVIF
clone_371_H11	clonotype1186H11	1	TRB:CASSPGQSSYEQYF;TRB:CASSRLGGVRAEQFF;TRA:CVLSRGYQNFYF
clone_372_H11	clonotype1187H11	1	TRB:CASSPDSAETLYF;TRA:CAAPSNYNVLYF
clone_373_H11	clonotype1188H11	1	TRB:CASSLGGQNTLYF;TRA:CVKGAGGYKVVF
clone_374_H11	clonotype1189H11	1	TRB:CASSKGQGYEQYF;TRA:CALANMGYKLTF
clone_375_H11	clonotype1190H11	1	TRB:CASSFGTKDTQYF;TRB:CASSLGLGDTLYF;TRA:CAAVSNYNVLYF;TRA:CALGRNSNNRIFF
clone_376_H11	clonotype1191H11	1	TRB:CASSIGYEQYF;TRA:CAMATGGNNKLTF
clone_377_H11	clonotype1192H11	1	TRB:CASSYPGTGRAPLF;TRA:CAVNNNAGAKLTF
clone_378_H11	clonotype1193H11	1	TRB:CASSQDPTSAETLYF;TRA:CAIEGSSFSKLVF
clone_379_H11	clonotype1194H11	1	TRB:CASSQVQGTDTEVFF;TRA:CAVKTSSGQKLVF
clone_380_H11	clonotype1195H11	1	TRB:CAWTGQGAENQDTQYF;TRA:CAGSSSSFSKLVF
clone_381_H11	clonotype1196H11	1	TRB:CASRRESSYEQYF;TRA:CATASLGKLQF
clone_382_H11	clonotype1197H11	1	TRB:CASSIPDFSNERLFF;TRB:CASSLGQNAEQFF;TRA:CAAAPGGNNKLTF
clone_383_H11	clonotype1198H11	1	TRB:CASRPGHNSDYTF;TRB:CASSLSDTGGHYAEQFF;TRA:CALNMGYKLTF
clone_384_H11	clonotype1199H11	1	TRB:CASSDGGQGAETLYF;TRB:CASSMARGDTEVFF;TRA:CATPVNTGNYKYVF
clone_385_H11	clonotype1200H11	1	TRB:CASSSGLGVGDTQYF;TRA:CAAEGPSFSKLVF
clone_386_H11	clonotype1201H11	1	TRB:CASSSRGDSYEQYF;TRA:CAAPNKVVF
clone_387_H11	clonotype1202H11	1	TRB:CTCSAGGYEQYF;TRA:CTAHVGDNSKLIW
clone_388_H11	clonotype1203H11	1	TRB:CASSIRDTQYF;TRA:CAVSDNNNAPRF
clone_389_H11	clonotype1204H11	1	TRB:CASSRDWGQYF;TRA:CAPRMRNNNNAPRF
clone_390_H11	clonotype1205H11	1	TRB:CASSPGQTNSDYTF;TRA:CALNTNTGKLTF
clone_391_H11	clonotype1206H11	1	TRB:CASSGGQGAETLYF;TRA:CAVYQGGRALIF
clone_392_H11	clonotype1207H11	1	TRB:CASSQDWGSQNTLYF;TRA:CALGVTGSGGKLTL
clone_393_H11	clonotype1208H11	1	TRB:CAWVPLGGSSAETLYF;TRA:CAAEDYYGNEKITF
clone_394_H11	clonotype1209H11	1	TRB:CASSGTGNTEVFF;TRA:CAAMSNYNVLYF
clone_395_H11	clonotype1210H11	1	TRB:CASSSKGNSDYTF;TRA:CAIDLTGNTGKLIF
clone_396_H11	clonotype1211H11	1	TRB:CASSLGRQNTLYF;TRA:CAAVTTGGNNKLTF
clone_397_H11	clonotype1212H11	1	TRB:CASSPSGGTEVFF;TRA:CALSGGGKLIF
clone_398_H11	clonotype1213H11	1	TRB:CASGDAQSNTEVFF;TRB:CASSPQANTEVFF;TRA:CALGNSGTYQRF;TRA:CAVRDGTNTGKLTF
clone_399_H11	clonotype1214H11	1	TRB:CASSLGFQNTLYF;TRA:CALNYNQGKLIF
clone_400_H11	clonotype1215H11	1	TRB:CASSLQGQNTLYF;TRA:CAVLVNTGNYKYVF
clone_401_H11	clonotype1216H11	1	TRB:CASSLTTNSDYTF;TRA:CAARANTNKVVF
clone_402_H11	clonotype1217H11	1	TRB:CASSFRDYYEQYF;TRA:CAARSNYNVLYF
clone_403_H11	clonotype1218H11	1	TRB:CASSFWGGAEQFF;TRA:CALELDTGYQNFYF
clone_404_H11	clonotype1219H11	1	TRB:CASSLDGGFEQYF;TRA:CALRTGGYKVVF
clone_405_H11	clonotype1220H11	1	TRB:CASSPDWGFQDTQYF;TRB:CASSTGTGGNTEVFF;TRA:CAVSSNTNKVVF
clone_406_H11	clonotype1221H11	1	TRB:CASSDRQGGNSDYTF;TRA:CAAEEDYNQGKLIF
clone_407_H11	clonotype1223H11	1	TRB:CASRGTGGASNERLFF;TRA:CAPHRGSALGRLHF
clone_408_H11	clonotype1224H11	1	TRB:CASSQELGGDTQYF;TRA:CAAEIMSNYNVLYF;TRA:CAMGSNYNQGKLIF
clone_409_H11	clonotype1226H11	1	TRB:CASSLTGGNSDYTF;TRA:CAAEVNNAGAKLTF
clone_410_H11	clonotype1227H11	1	TRB:CASSLGLGGFEQYF;TRA:CAMERRTNTGKLTF;TRA:CASTSSGSWQLIF
clone_411_H11	clonotype1228H11	1	TRB:CTCSAQGAEVFF;TRA:CAVGNMGYKLTF
clone_412_H11	clonotype1229H11	1	TRB:CTCSAERYEQYF;TRA:CAAGLTGNTGKLIF
clone_413_H11	clonotype1230H11	1	TRB:CASSQTGQGRDTQYF;TRA:CAAASSGSWQLIF
clone_414_H11	clonotype1231H11	1	TRB:CASSQEGGREDTQYF;TRA:CAAHDTNAYKVIF
clone_415_H11	clonotype1232H11	1	TRB:CASSPEGGSGNTLYF;TRA:CALSGTNTGKLTF
clone_416_H11	clonotype1233H11	1	TRB:CASSRDWGGHDTQYF;TRA:CALRGQGGRALIF
clone_417_H11	clonotype1235H11	1	TRB:CASSPEGVDTQYF;TRA:CALEHSGGSNAKLTF
clone_418_H11	clonotype1236H11	1	TRB:CASSAGQGETLYF;TRA:CAVSTSGSWQLIF
clone_419_H11	clonotype1237H11	1	TRB:CASSLRGITEVFF;TRA:CAAGDSGGSNAKLTF
clone_420_H11	clonotype1238H11	1	TRB:CASSLADNYEQYF;TRA:CAVSANNNNAPRF
clone_421_H11	clonotype1239H11	1	TRB:CASSLEGSDTQYF;TRA:CAMEHSGGSNAKLTF
clone_422_H11	clonotype1240H11	1	TRB:CASSRTGDAETLYF;TRA:CAAASSGSWQLIF
clone_423_H11	clonotype1241H11	1	TRB:CASSFSSQNTLYF;TRA:CAVRKNSNNRIFF
clone_424_H11	clonotype1242H11	1	TRB:CASSFGSGNTLYF;TRA:CALALASSSFSKLVF
clone_425_H11	clonotype1243H11	1	TRB:CASSLGQGGTLYF;TRA:CALSPLDVGDNSKLIW;TRA:CAVTPSNYNVLYF
clone_426_H11	clonotype1244H11	1	TRB:CASSFQVNTEVFF;TRA:CAASGGGSWQLIF
clone_427_H11	clonotype1245H11	1	TRB:CASSEQGADTGQLYF;TRA:CAAGGGNRIFF
clone_428_H11	clonotype1246H11	1	TRB:CASSERDRGAETLYF;TRA:CAVSMTNAYKVIF
clone_429_H11	clonotype1247H11	1	TRB:CASSDGTISNERLFF;TRA:CAVKPSSFSKLVF
clone_430_H11	clonotype1248H11	1	TRB:CASSGRTGWHTEVFF;TRA:CAAEVYDTNAYKVIF
clone_431_H11	clonotype1250H11	1	TRB:CASSQDYRGAEQFF;TRA:CAVSMSNYNVLYF
clone_432_H11	clonotype1251H11	1	TRB:CASSQGTANTEVFF;TRA:CALGDQGGRALIF;TRA:CAVSEPSGSWQLIF
clone_433_H11	clonotype1252H11	1	TRB:CASSVRDANTEVFF;TRA:CAVSAGMGYKLTF
clone_434_H11	clonotype1253H11	1	TRB:CASQTGVDTGQLYF;TRA:CAVSPNSNNRIFF
clone_435_H11	clonotype1255H11	1	TRB:CTCSPQGFEQYF;TRA:CAVSGNNRIFF
clone_436_H11	clonotype1256H11	1	TRB:CASTATGNYAEQFF;TRA:CAASSSSGSWQLIF
clone_437_H11	clonotype1257H11	1	TRB:CASSSGTSNTEVFF;TRA:CALSPNNYAQGLTF
clone_438_H11	clonotype1258H11	1	TRB:CASSQDRGSAETLYF;TRA:CAVSAGNYAQGLTF
clone_439_H11	clonotype1259H11	1	TRB:CASSQTGTGDERLFF;TRA:CAVSMSNYNVLYF
clone_440_H11	clonotype1260H11	1	TRB:CASSPGTKDTQYF;TRA:CAASRAGNTGKLIF
clone_441_H11	clonotype1261H11	1	TRB:CASSSGLVNTLYF;TRA:CAVSPNNNNAPRF
clone_442_H11	clonotype1262H11	1	TRB:CASSRAVSNERLFF;TRA:CAASPSNYQLIW
clone_443_H11	clonotype1264H11	1	TRB:CASSLDWGKEQYF;TRB:CASSPGTGGAENNQAPLF;TRA:CAVLSNYNVLYF
clone_444_H11	clonotype1265H11	1	TRB:CASSLGSQNTLYF;TRA:CATETTASLGKLQF
clone_445_H11	clonotype1266H11	1	TRB:CASRDNANTEVFF;TRA:CAMRENTGNYKYVF
clone_446_H11	clonotype1267H11	1	TRB:CASSSTGQNTLYF;TRA:CAVSSNSAGNKLTF
clone_447_H11	clonotype1268H11	1	TRB:CASSLGTYAEQFF;TRA:CALGNNAGAKLTF
clone_448_H11	clonotype1269H11	1	TRB:CASSEGTGGGERLFF;TRA:CALKGYANKMIF
clone_449_H11	clonotype1270H11	1	TRB:CASSDRTGATGQLYF;TRB:CASSIRLGAKDTQYF;TRA:CATDAMSNYNVLYF
clone_450_H11	clonotype1271H11	1	TRB:CASSDEGSNQDTQYF;TRA:CAVSPYQGGRALIF
clone_451_H11	clonotype1272H11	1	TRB:CASSDAPGGDSDYTF;TRA:CATAASSGSWQLIF
clone_452_H11	clonotype1274H11	1	TRB:CASGSRDRDEDTQYF;TRA:CAGMTNSAGNKLTF
clone_453_H11	clonotype1275H11	1	TRB:CASGDPLGNTGQLYF;TRA:CAASNNYNVLYF
clone_454_H11	clonotype1276H11	1	TRB:CASGDATASQNTLYF;TRA:CALNNAGAKLTF
clone_455_H11	clonotype1277H11	1	TRB:CASGDGTVSQNTLYF;TRA:CAVSPSSNTNKVVF
clone_456_H11	clonotype1278H11	1	TRB:CASSGGLGGPAETLYF;TRA:CAVSSTASLGKLQF
clone_457_H11	clonotype1279H11	1	TRB:CASSQEDSSYEQYF;TRA:CAVRGSGGNYKPTF;TRA:CVLGDHSNNRLTL
clone_458_H11	clonotype1280H11	1	TRB:CASSHGTGGLEQYF;TRB:CASSTQDRSETLYF;TRA:CAASAAGNTGKLIF;TRA:CVLDNNAGAKLTF
clone_459_H11	clonotype1281H11	1	TRB:CASSDGTGVDQAPLF;TRB:CASSPGTFNERLFF;TRA:CAVSIGSGYNKLTF
clone_460_H11	clonotype1282H11	1	TRB:CASSWTGGAYEQYF;TRA:CAARMNYNQGKLIF
clone_461_H11	clonotype1283H11	1	TRB:CTCSAPDYEQYF;TRA:CALEDSGYQNFYF
clone_462_H11	clonotype1284H11	1	TRB:CASRSQNTLYF;TRA:CAAGDRGSALGRLHF
clone_463_H11	clonotype1285H11	1	TRB:CASSPTAYEQYF;TRB:CASTRDRGNSDYTF;TRA:CAVTSTGGYKVVF
clone_464_H11	clonotype1286H11	1	TRB:CASSLKGHQDTQYF;TRA:CAGGGASSSFSKLVF
clone_465_H11	clonotype1287H11	1	TRB:CASGDSRVGTEVFF;TRB:CASSLSSGGETLYF;TRA:CAADSGYNKLTF;TRA:CALGNNNNAPRF
clone_466_H11	clonotype1288H11	1	TRB:CASSQDRLGGLEQYF;TRA:CVLGEGSAGNKLTF
clone_467_H11	clonotype1289H11	1	TRB:CASSLEDSYEQYF;TRA:CAVSAPGNTGKLIF
clone_468_H11	clonotype1290H11	1	TRB:CASSLGSQNTLYF;TRA:CAVSGTSGGNYKPTF
clone_469_H11	clonotype1292H11	1	TRB:CASRDTGGGEQYF;TRA:CALSRTSGGNYKPTF
clone_470_H11	clonotype1293H11	1	TRB:CASSLAAGYEQYF;TRA:CAVSAGGNYKPTF
clone_471_H11	clonotype1294H11	1	TRB:CASSLETGGSWEQYF;TRB:CASSLGNYAEQFF;TRA:CALVENNNAPRF;TRA:CAVSEANTNKVVF
clone_472_H11	clonotype1295H11	1	TRB:CASSFQGQDTQYF;TRA:CALSASNNRIFF
clone_473_H11	clonotype1296H11	1	TRB:CASSLGGAETLYF;TRA:CAAIGQGGRALIF
clone_474_H11	clonotype1297H11	1	TRB:CASSFGRGYEQYF;TRA:CAASGRGSALGRLHF
clone_475_H11	clonotype1298H11	1	TRB:CASRHRGANTGQLYF;TRA:CAASKSSNNRIFF;TRA:CALSDESNNRIFF
clone_476_H11	clonotype1299H11	1	TRB:CASRGWGGNYAEQFF;TRA:CAASPGANTGKLTF;TRA:CAGANTGYQNFYF
clone_477_H11	clonotype1300H11	1	TRB:CASSDAAVSNERLFF;TRA:CAASKNYAQGLTF
clone_478_H11	clonotype1302H11	1	TRB:CASGDSGINQDTQYF;TRA:CAAHVGSNYQLIW
clone_479_H11	clonotype1303H11	1	TRB:CASGVPGQGGNTLYF;TRA:CALLNTGNYKYVF
clone_480_H11	clonotype1304H11	1	TRB:CASSLDRNTGQLYF;TRB:CASSWDWGQDTQYF;TRA:CAVSGNTGNYKYVF
clone_481_H11	clonotype1305H11	1	TRB:CASSWDRVYAEQFF;TRA:CAASRDSGTYQRF
clone_482_H11	clonotype1306H11	1	TRB:CASSLLGEGDTQYF;TRA:CARGSALGRLHF
clone_483_H11	clonotype1307H11	1	TRB:CASSGGTGGVAPLF;TRA:CAVSGVITGNTGKLIF
clone_484_H11	clonotype1309H11	1	TRB:CASGDAQGRDTGQLYF;TRB:CASSQEGSNTGQLYF;TRA:CALSDGTNAYKVIF
clone_485_H11	clonotype1310H11	1	TRB:CASSQEGTGGTEVFF;TRA:CAASTGANTGKLTF
clone_486_H11	clonotype1311H11	1	TRB:CASSQEWGDSYEQYF;TRA:CAASEHWVGDNSKLIW
clone_487_H11	clonotype1312H11	1	TRB:CASSQDGSNNQAPLF;TRA:CAVSGSGSFNKLTF
clone_488_H11	clonotype1313H11	1	TRB:CASSQGGQYNSPLYF;TRA:CALNYGSSGNKLIF
clone_489_H11	clonotype1314H11	1	TRB:CASSRQGNSGNTLYF;TRB:CASSSGGGDTQYF;TRA:CAAAKLTF;TRA:CAAHQGGSAKLIF
clone_490_H11	clonotype1315H11	1	TRB:CASSLARRYEQYF;TRA:CAVSALSGGSNYKLTF
clone_491_H11	clonotype1316H11	1	TRB:CASSLTGGAEQFF;TRA:CALAPYQGGRALIF
clone_492_H11	clonotype1317H11	1	TRB:CASSEIGDSDYTF;TRA:CAASWDSGYNKLTF
clone_493_H11	clonotype1319H11	1	TRB:CASSLGLENTLYF;TRA:CALSITGNTGKLIF
clone_494_H11	clonotype1320H11	1	TRB:CASSRDRDAEQFF;TRA:CAPGFASALTF
clone_495_H11	clonotype1321H11	1	TRB:CASSLGQQDTQYF;TRA:CVLSAPGANTGKLTF
clone_496_H11	clonotype1322H11	1	TRB:CASSLAGGYEQYF;TRA:CALGYGSSGNKLIF
clone_497_H11	clonotype1323H11	1	TRB:CASSLGGGATLYF;TRA:CAARATGGNNKLTF;TRA:CAMREGSGGSNYKLTF
clone_498_H11	clonotype1325H11	1	TRB:CASSDAGRNNSPLYF;TRA:CVLGRMNYNQGKLIF
clone_499_H11	clonotype1326H11	1	TRB:CASSDGGQSNERLFF;TRA:CAASTAGNTGKLIF
clone_500_H11	clonotype1327H11	1	TRB:CASSAGTGGIEQYF;TRB:CASSGTGGADTGQLYF;TRA:CAVSSNTNTGKLTF
clone_501_H11	clonotype1328H11	1	TRB:CASSQETGQNTLYF;TRA:CAVSAGTGGYKVVF
clone_502_H11	clonotype1329H11	1	TRB:CASSQVGGYAEQFF;TRA:CALSPRGSALGRLHF
clone_503_H11	clonotype1330H11	1	TRB:CASSRTGNTGQLYF;TRA:CAVSAGNSGTYQRF
clone_504_H11	clonotype1331H11	1	TRB:CASSGDRIQNTLYF;TRA:CAVDNTNTGKLTF
clone_505_H11	clonotype1332H11	1	TRB:CTCSGVGAEQYF;TRA:CALSEGNMGYKLTF
clone_506_H11	clonotype1333H11	1	TRB:CASSFWGRTGQLYF;TRA:CALGDRDNYAQGLTF
clone_507_H11	clonotype1334H11	1	TRB:CASSQEGQGSYEQYF;TRA:CALGGATGGNNKLTF
clone_508_H11	clonotype1335H11	1	TRB:CASSQEGDWGDEQYF;TRA:CAADLASSSFSKLVF
clone_509_H11	clonotype1336H11	1	TRB:CASSQGTGGSYEQYF;TRA:CALVMNYNQGKLIF
clone_510_H11	clonotype1337H11	1	TRB:CASSHPGNSSYEQYF;TRA:CAASPYDTNAYKVIF
clone_511_H11	clonotype1338H11	1	TRB:CASSPQANTEVFF;TRA:CALGYTGANTGKLTF
clone_512_H11	clonotype1339H11	1	TRB:CASSLTDKYEQYF;TRA:CALGDYNQGKLIF
clone_513_H11	clonotype1340H11	1	TRB:CASSLQGGNTLYF;TRA:CAVSDNVGDNSKLIW
clone_514_H11	clonotype1341H11	1	TRB:CASSLQPNERLFF;TRA:CALKGDYSNNRLTL
clone_515_H11	clonotype1342H11	1	TRB:CASSLEGGYEQYF;TRA:CALRDYTGGNNKLTF
clone_516_H11	clonotype1343H11	1	TRB:CASSLDNQDTQYF;TRA:CAAIMTTASLGKLQF;TRA:CALGNTNTGKLTF
clone_517_H11	clonotype1344H11	1	TRB:CASSLSGTYQDTQYF;TRA:CALGDQGTGGYKVVF
clone_518_H11	clonotype1345H11	1	TRB:CASSQEAGGAEQFF;TRA:CATTEAYGNEKITF
clone_519_H11	clonotype1346H11	1	TRB:CASSQSPANSDYTF;TRA:CAASRVNTGNYKYVF
clone_520_H11	clonotype1347H11	1	TRB:CASKLGGGQNTLYF;TRA:CALSDNNAGAKLTF
clone_521_H11	clonotype1348H11	1	TRB:CASSLWGNTGQLYF;TRA:CAARRRGGSNYKLTF
clone_522_H11	clonotype1349H11	1	TRB:CTCSEQGAEVFF;TRA:CVVGDRGSALGRLHF
clone_523_H11	clonotype1351H11	1	TRB:CTCSAGTYEQYF;TRA:CALSAHNNAGAKLTF
clone_524_H11	clonotype1352H11	1	TRB:CASSQEGSNTGQLYF;TRA:CAMRGITGNTGKLIF
clone_525_H11	clonotype1353H11	1	TRB:CASSQESDNYAEQFF;TRA:CALGDRTGGYKVVF
clone_526_H11	clonotype1354H11	1	TRB:CASSPRGSSAETLYF;TRA:CALGEAGSFNKLTF
clone_527_H11	clonotype1355H11	1	TRB:CASSPRQDANTEVFF;TRA:CALGDQYSNNRIFF
clone_528_H11	clonotype1356H11	1	TRB:CASSPGQPNTLYF;TRA:CALGDLQQGTGSKLSF
clone_529_H11	clonotype1358H11	1	TRB:CASSLTGENTLYF;TRA:CAMRETPSNTNKVVF
clone_530_H11	clonotype1359H11	1	TRB:CASSLREGNTLYF;TRA:CALGDRGSNNRIFF
clone_531_H11	clonotype135H11	1	TRB:CASSQEQGDAETLYF;TRA:CAASSAGSFNKLTF;TRA:CATLNTGGLSGKLTF
clone_532_H11	clonotype1360H11	1	TRB:CASSLGLSYEQYF;TRA:CAMREGTSSGQKLVF
clone_533_H11	clonotype1361H11	1	TRB:CASRGRNYAEQFF;TRA:CAASVMNQGGSAKLIF
clone_534_H11	clonotype1362H11	1	TRB:CASSQQVNQDTQYF;TRA:CALGAYQGGRALIF
clone_535_H11	clonotype1363H11	1	TRB:CASSQVAEASDYTF;TRA:CALATNTGNYKYVF
clone_536_H11	clonotype1364H11	1	TRB:CTCSAGNQAPLF;TRA:CALGEGSGGSNYKLTF
clone_537_H11	clonotype1365H11	1	TRB:CTCARGDERLFF;TRA:CAASANTGANTGKLTF
clone_538_H11	clonotype1366H11	1	TRB:CASSQDGHSGNTLYF;TRA:CALGDQTQGGRALIF
clone_539_H11	clonotype1367H11	1	TRB:CASETGGAREQYF;TRA:CAMREGDNYAQGLTF
clone_540_H11	clonotype1368H11	1	TRB:CASSLGLSYEQYF;TRB:CASSQSGTGRSAEQFF;TRA:CAPGGQKLVF
clone_541_H11	clonotype1369H11	1	TRB:CASSARDWGGGAETLYF;TRB:CASSDARTGGKETLYF;TRA:CALASSSFSKLVF;TRA:CAMRENTEGADRLTF
clone_542_H11	clonotype1370H11	1	TRB:CASSRDNSGNTLYF;TRA:CAEGSWQLIF
clone_543_H11	clonotype1371H11	1	TRB:CASSQEGGSNERLFF;TRA:CAMRGPNTGANTGKLTF
clone_544_H11	clonotype1372H11	1	TRB:CASSQAGWDQNTLYF;TRA:CAMREGETGFASALTF
clone_545_H11	clonotype1373H11	1	TRB:CASSLGLGGQDTQYF;TRA:CAMREGPTQVVGQLTF
clone_546_H11	clonotype1375H11	1	TRB:CASSLGGGQAPLF;TRA:CAAGTGGYKVVF
clone_547_H11	clonotype1376H11	1	TRB:CASSFGTKDTQYF;TRA:CAATSSGQKLVF
clone_548_H11	clonotype1377H11	1	TRB:CASGDANRGRERLFF;TRB:CASSLRTYSDYTF;TRA:CAAGGNSNNRIFF
clone_549_H11	clonotype1378H11	1	TRB:CASSEGWGGPETLYF;TRA:CAARTGGNNKLTF
clone_550_H11	clonotype1379H11	1	TRB:CAWSSGLGGLAETLYF;TRA:CAASGSNNRIFF
clone_551_H11	clonotype1380H11	1	TRB:CASSSRQFTEVFF;TRA:CAAGRQGTGSKLSF
clone_552_H11	clonotype1381H11	1	TRB:CASSWDTNQAPLF;TRA:CAASGGSNAKLTF
clone_553_H11	clonotype1382H11	1	TRB:CASSRQSGNTLYF;TRA:CAASGAGGYKVVF
clone_554_H11	clonotype1383H11	1	TRB:CASSLPGEDTQYF;TRA:CAASVTGYQNFYF
clone_555_H11	clonotype1384H11	1	TRB:CASSLEDTQYF;TRB:CASTPGHQDTQYF;TRA:CAASEGADRLTF
clone_556_H11	clonotype1385H11	1	TRB:CASSGRDRISNERLFF;TRA:CAATHSGYNKLTF
clone_557_H11	clonotype1386H11	1	TRB:CTCSADEDTQYF;TRA:CAASHQGGRALIF
clone_558_H11	clonotype1387H11	1	TRB:CTCSAGGWEQYF;TRA:CAASAGSGGKLTL
clone_559_H11	clonotype1388H11	1	TRB:CASSQDSLGGGEQYF;TRA:CAASNTGYQNFYF
clone_560_H11	clonotype1389H11	1	TRB:CASSQPGLGGYEQYF;TRA:CAASRTGGNNKLTF
clone_561_H11	clonotype1392H11	1	TRB:CASSQDPNNERLFF;TRA:CAARITGNTGKLIF;TRA:CALSGTGNTGKLIF
clone_562_H11	clonotype1393H11	1	TRB:CASSAGLGGNTLYF;TRA:CAASDPSFSKLVF
clone_563_H11	clonotype1394H11	1	TRB:CASSLTGGQDTQYF;TRA:CAASWGGSGGKLTL
clone_564_H11	clonotype1395H11	1	TRB:CASRWGVQDTQYF;TRA:CAAYASSGSWQLIF
clone_565_H11	clonotype1396H11	1	TRB:CASSLSGNSPLYF;TRA:CAASGTGNTGKLIF
clone_566_H11	clonotype1397H11	1	TRB:CASSPGTGTEVFF;TRA:CAAMRGGSNAKLTF
clone_567_H11	clonotype1398H11	1	TRB:CASSFGAGNTLYF;TRA:CAARVITGNTGKLIF
clone_568_H11	clonotype1399H11	1	TRB:CASSDATGDNNQAPLF;TRA:CAASPANSAGNKLTF
clone_569_H11	clonotype1400H11	1	TRB:CASSQDPSQNTLYF;TRA:CAASGRGGSAKLIF
clone_570_H11	clonotype1401H11	1	TRB:CASSQDGTGDTQYF;TRA:CAASDSTGNYKYVF
clone_571_H11	clonotype1402H11	1	TRB:CASSRPDRAGTEVFF;TRA:CAASRASGGNYKPTF
clone_572_H11	clonotype1403H11	1	TRB:CASSQWGANSDYTF;TRA:CAASEGGTNAYKVIF
clone_573_H11	clonotype1404H11	1	TRB:CASSFDTKDTQYF;TRA:CALRNNNNAPRF
clone_574_H11	clonotype1405H11	1	TRB:CASSDRTGGSQNTLYF;TRA:CAARDRAYQGGRALIF
clone_575_H11	clonotype1406H11	1	TRB:CASSSEYNSPLYF;TRA:CALSDTNTNKVVF
clone_576_H11	clonotype1407H11	1	TRB:CASSLGLGGYEQYF;TRA:CALSDLYNQGKLIF
clone_577_H11	clonotype1408H11	1	TRB:CASSPTGVSEQYF;TRA:CALSALYGNAGAKLTF
clone_578_H11	clonotype1409H11	1	TRB:CASSLDLNSPLYF;TRA:CALSDQTGFASALTF
clone_579_H11	clonotype140H11	1	TRB:CASSLSPRATEVFF;TRA:CAAPDYSNNRLTL;TRA:CALESGGNNKLTF
clone_580_H11	clonotype1410H11	1	TRA:CAASKNSGTYQRF
clone_581_H11	clonotype1411H11	1	TRA:CAVSMGAGNTGKLIF
clone_582_H11	clonotype1412H11	1	TRB:CASSPSAETLYF
clone_583_H11	clonotype1413H11	1	TRB:CASSRTGEEVFF
clone_584_H11	clonotype1414H11	1	TRB:CASSMDRGEQYF
clone_585_H11	clonotype1415H11	1	TRB:CASSMDRGEQYF
clone_586_H11	clonotype1416H11	1	TRB:CASSMDRGEQYF
clone_587_H11	clonotype1417H11	1	TRB:CASSLQENTLYF
clone_588_H11	clonotype1418H11	1	TRB:CASGTGEDTQYF
clone_589_H11	clonotype1419H11	1	TRB:CASGTGRDTQYF
clone_590_H11	clonotype1420H11	1	TRA:CVLGASSGSWQLIF
clone_591_H11	clonotype1421H11	1	TRA:CSASKTGGYKVVF
clone_592_H11	clonotype1422H11	1	TRA:CSASKTGGYKVVF
clone_593_H11	clonotype1423H11	1	TRA:CSASKTGGYKVVF
clone_594_H11	clonotype1424H11	1	TRA:CAVRGYNQGKLIF
clone_595_H11	clonotype1425H11	1	TRA:CAVSEAGGYKVVF
clone_596_H11	clonotype1426H11	1	TRA:CAASMGSNNRIFF
clone_597_H11	clonotype1427H11	1	TRB:CASSLSDWGKDTQYF
clone_598_H11	clonotype1428H11	1	TRB:CASSQELGKNTGQLYF
clone_599_H11	clonotype1429H11	1	TRB:CASSQEGTGITGQLYF
clone_600_H11	clonotype1430H11	1	TRB:CASSQEGTGITGQLYF
clone_601_H11	clonotype1431H11	1	TRB:CASSQEGRTGDERLFF
clone_602_H11	clonotype1433H11	1	TRB:CASSQEGRTGDERLFF
clone_603_H11	clonotype1434H11	1	TRB:CASSQEGRTGDERLFF
clone_604_H11	clonotype1435H11	1	TRB:CASSQEGRTGDERLFF
clone_605_H11	clonotype1436H11	1	TRB:CASSQEGRTGDERLFF
clone_606_H11	clonotype1437H11	1	TRB:CASSQEGDSYNSPLYF
clone_607_H11	clonotype1439H11	1	TRB:CASSQEGRTGNERLFF
clone_608_H11	clonotype1440H11	1	TRB:CASSQDAGGNTGQLYF
clone_609_H11	clonotype1441H11	1	TRB:CASSQDGRTGPETLYF
clone_610_H11	clonotype1442H11	1	TRB:CASSQDGRTGPETLYF
clone_611_H11	clonotype1443H11	1	TRB:CASSQDGRTGPETLYF
clone_612_H11	clonotype1444H11	1	TRB:CASSQDGRTGPETLYF
clone_613_H11	clonotype1445H11	1	TRB:CASSQDLGGFQDTQYF
clone_614_H11	clonotype1447H11	1	TRB:CASSPHWGGGAETLYF
clone_615_H11	clonotype1448H11	1	TRB:CASSPQDWGSAETLYF
clone_616_H11	clonotype1449H11	1	TRA:CAVSLNTGNYKYVF
clone_617_H11	clonotype1450H11	1	TRA:CAVSTGANTGKLTF
clone_618_H11	clonotype1451H11	1	TRA:CALSMGGSNAKLTF
clone_619_H11	clonotype1453H11	1	TRA:CALSMGGSNAKLTF
clone_620_H11	clonotype1454H11	1	TRA:CALSASSGSWQLIF
clone_621_H11	clonotype1455H11	1	TRB:CAWSLGTGGAGTGQLYF
clone_622_H11	clonotype1456H11	1	TRA:CALSHNYAQGLTF
clone_623_H11	clonotype1458H11	1	TRA:CALSDDSNNRIFF
clone_624_H11	clonotype1459H11	1	TRA:CALALTNAYKVIF
clone_625_H11	clonotype1460H11	1	TRA:CALGGTNAYKVIF
clone_626_H11	clonotype1461H11	1	TRB:CASRRDRANSDYTF
clone_627_H11	clonotype1462H11	1	TRB:CASSPLGGYAEQFF
clone_628_H11	clonotype1463H11	1	TRB:CASSPTPSQNTLYF
clone_629_H11	clonotype1464H11	1	TRB:CASSPTPSQNTLYF
clone_630_H11	clonotype1465H11	1	TRB:CASSPDWGENTLYF
clone_631_H11	clonotype1466H11	1	TRB:CASSPDWGGTEQFF
clone_632_H11	clonotype1467H11	1	TRB:CASSRDWGSETLYF
clone_633_H11	clonotype1468H11	1	TRB:CASSSLGNTGQLYF
clone_634_H11	clonotype1469H11	1	TRB:CASSLRQNYAEQFF
clone_635_H11	clonotype1470H11	1	TRB:CASSLALGQYEQYF
clone_636_H11	clonotype1471H11	1	TRB:CASSLAGTGNTLYF
clone_637_H11	clonotype1472H11	1	TRB:CASSLGRNYAEQFF
clone_638_H11	clonotype1473H11	1	TRB:CASSLGAGGYEQYF
clone_639_H11	clonotype1474H11	1	TRB:CASSLGISNERLFF
clone_640_H11	clonotype1476H11	1	TRB:CASSFRDRGSDYTF
clone_641_H11	clonotype1477H11	1	TRB:CASSFGGAQDTQYF
clone_642_H11	clonotype1479H11	1	TRB:CASSLGPSAETLYF
clone_643_H11	clonotype1480H11	1	TRB:CASSFDSPNTEVFF
clone_644_H11	clonotype1481H11	1	TRB:CASSFEGGGNTLYF
clone_645_H11	clonotype1482H11	1	TRB:CASSFWGNTGQLYF
clone_646_H11	clonotype1483H11	1	TRB:CASSRTGGDTEVFF
clone_647_H11	clonotype1484H11	1	TRB:CASRRLGFNQDTQYF
clone_648_H11	clonotype1485H11	1	TRB:CASSRDMGNYAEQFF
clone_649_H11	clonotype1487H11	1	TRB:CASSTQGSQNTLYF
clone_650_H11	clonotype1488H11	1	TRB:CASSQPHRGYEQYF
clone_651_H11	clonotype1490H11	1	TRB:CASSVGWGGYEQYF
clone_652_H11	clonotype1491H11	1	TRB:CASSWDSHNERLFF
clone_653_H11	clonotype1492H11	1	TRB:CASSLKLGGPEQYF
clone_654_H11	clonotype1493H11	1	TRB:CASSLQGQNTEVFF
clone_655_H11	clonotype1494H11	1	TRB:CASSLEQANTEVFF
clone_656_H11	clonotype1495H11	1	TRB:CASSLEGSNTEVFF
clone_657_H11	clonotype1496H11	1	TRB:CASSLEGSNTEVFF
clone_658_H11	clonotype1497H11	1	TRB:CASSLDGRGYEQYF
clone_659_H11	clonotype1498H11	1	TRB:CASSLANSGNTLYF
clone_660_H11	clonotype1499H11	1	TRB:CASSLGQGGAEQFF
clone_661_H11	clonotype1500H11	1	TRB:CASSLGGTNERLFF
clone_662_H11	clonotype1502H11	1	TRB:CASSFGISNERLFF
clone_663_H11	clonotype1504H11	1	TRB:CASSRTGGAETLYF
clone_664_H11	clonotype1505H11	1	TRB:CASSGFWGSYEQYF
clone_665_H11	clonotype1506H11	1	TRB:CASRRDRRNTEVFF
clone_666_H11	clonotype1507H11	1	TRB:CASSTGGGQNTLYF
clone_667_H11	clonotype1508H11	1	TRB:CASSPPGRGNTLYF
clone_668_H11	clonotype1510H11	1	TRB:CASSPTVNQDTQYF
clone_669_H11	clonotype1511H11	1	TRB:CASSRTGYNSPLYF
clone_670_H11	clonotype1512H11	1	TRB:CASSLGGKGSPLYF
clone_671_H11	clonotype1514H11	1	TRB:CASSLQGTNSDYTF
clone_672_H11	clonotype1516H11	1	TRB:CASSLGQNYAEQFF
clone_673_H11	clonotype1517H11	1	TRB:CASSLPGARSDYTF
clone_674_H11	clonotype1519H11	1	TRB:CASSRTGGEDTQYF
clone_675_H11	clonotype1520H11	1	TRB:CASSLTGGTYEQYF
clone_676_H11	clonotype1521H11	1	TRB:CASSLGTNTGQLYF
clone_677_H11	clonotype1522H11	1	TRB:CASSLWVGQNTLYF
clone_678_H11	clonotype1523H11	1	TRB:CASSFYFNTGQLYF
clone_679_H11	clonotype1524H11	1	TRB:CASSFWNSNERLFF
clone_680_H11	clonotype1525H11	1	TRB:CASSFWGEGAEQFF
clone_681_H11	clonotype1526H11	1	TRB:CASSQARLGYEQYF
clone_682_H11	clonotype1527H11	1	TRB:CASRPGQANTEVFF
clone_683_H11	clonotype1528H11	1	TRB:CASSRTGGQDTQYF
clone_684_H11	clonotype1529H11	1	TRB:CASSSQGTNTEVFF
clone_685_H11	clonotype1530H11	1	TRB:CASSLVGGQDTQYF
clone_686_H11	clonotype1531H11	1	TRB:CASRGLGPSSQNTLYF
clone_687_H11	clonotype1532H11	1	TRB:CASGDSGGANTGQLYF
clone_688_H11	clonotype1533H11	1	TRB:CASGDATGGNYAEQFF
clone_689_H11	clonotype1534H11	1	TRB:CASGDAGGHSQNTLYF
clone_690_H11	clonotype1535H11	1	TRB:CASSQDWGVENTLYF
clone_691_H11	clonotype1538H11	1	TRB:CASSQTGASAETLYF
clone_692_H11	clonotype1540H11	1	TRB:CASSSRDRGYAEQFF
clone_693_H11	clonotype1541H11	1	TRB:CASSSSGTSAETLYF
clone_694_H11	clonotype1542H11	1	TRB:CASSSSGTSAETLYF
clone_695_H11	clonotype1543H11	1	TRB:CASSSSGTSAETLYF
clone_696_H11	clonotype1545H11	1	TRB:CASSKTGRSAETLYF
clone_697_H11	clonotype1546H11	1	TRB:CASSKTGRSAETLYF
clone_698_H11	clonotype1547H11	1	TRB:CTCSKQSNERLFF
clone_699_H11	clonotype1548H11	1	TRB:CTCSADRNSDYTF
clone_700_H11	clonotype1549H11	1	TRB:CTCSADRGYEQYF
clone_701_H11	clonotype1550H11	1	TRB:CTCSAGDTGQLYF
clone_702_H11	clonotype1551H11	1	TRB:CTCSAGGLTEVFF
clone_703_H11	clonotype1552H11	1	TRB:CTCSASTNTEVFF
clone_704_H11	clonotype1553H11	1	TRB:CTCSADRADTQYF
clone_705_H11	clonotype1554H11	1	TRB:CTCAGQPNSDYTF
clone_706_H11	clonotype1555H11	1	TRB:CASSLNGGVGNTLYF;TRB:CASSQDGGPNTEVFF;TRA:CAVPYQGGRALIF;TRA:CAYNNRIFF
clone_707_H11	clonotype1556H11	1	TRB:CASSSGLGGSYEQYF;TRA:CAIQGKLIF
clone_708_H11	clonotype1557H11	1	TRB:CASSPRTGGYEQYF;TRA:CAASVNNNAPRF;TRA:CAIDHNAPRF
clone_709_H11	clonotype1559H11	1	TRB:CASSPDSSGNTLYF;TRA:CAFNMGYKLTF
clone_710_H11	clonotype1560H11	1	TRB:CTCSGLGGLEQYF;TRA:CATDVHTGKLTF
clone_711_H11	clonotype1561H11	1	TRB:CASSLGVNNQAPLF;TRA:CAAVNNNNAPRF
clone_712_H11	clonotype1562H11	1	TRB:CASSRAGTGGYEQYF;TRA:CIVTDRNSGTYQRF
clone_713_H11	clonotype1563H11	1	TRB:CASSSQGNQNTLYF;TRA:CAPSGSFNKLTF
clone_714_H11	clonotype1564H11	1	TRB:CASSSQGRNSDYTF;TRA:CILRDRYGNEKITF
clone_715_H11	clonotype1565H11	1	TRB:CASSLAGTGNTLYF;TRA:CILRNQGGSAKLIF
clone_716_H11	clonotype1566H11	1	TRB:CASSSGLFQDTQYF;TRA:CAAGSNYNVLYF
clone_717_H11	clonotype1567H11	1	TRB:CASSLGTDNERLFF;TRA:CAAEGSNYQLIW
clone_718_H11	clonotype1568H11	1	TRB:CASSQPGQNYAEQFF;TRA:CALDNNAPRF
clone_719_H11	clonotype1569H11	1	TRB:CTCSADRENTLYF;TRA:CAAAYNQGKLIF
clone_720_H11	clonotype1572H11	1	TRB:CASMGGDSPLYF;TRA:CAAEDTNAYKVIF
clone_721_H11	clonotype1573H11	1	TRB:CASSPGLGGDTQYF;TRA:CAAEAVSNYQLIW
clone_722_H11	clonotype1574H11	1	TRB:CASSLLGGEAEQFF;TRA:CAVNNNNAPRF
clone_723_H11	clonotype1575H11	1	TRB:CASSSGLGVYEQYF;TRA:CAAPTASLGKLQF
clone_724_H11	clonotype1576H11	1	TRB:CASSYGTSQNTLYF;TRA:CILRVEEGTGSKLSF
clone_725_H11	clonotype1577H11	1	TRB:CASSFRGGAETLYF;TRA:CAAPPGGNYKPTF
clone_726_H11	clonotype1578H11	1	TRB:CASSQEGQGSTEVFF;TRA:CAFGDNSKLIW
clone_727_H11	clonotype1579H11	1	TRB:CTCSADRDTEQYF;TRA:CAADLTGNTGKLIF;TRA:CIVTAYNNAGAKLTF
clone_728_H11	clonotype157H11	1	TRB:CASGDASWGGGQNTLYF;TRA:CAAYQGGSAKLIF
clone_729_H11	clonotype1580H11	1	TRB:CTCSADGAETLYF;TRA:CALAYQGGRALIF
clone_730_H11	clonotype1581H11	1	TRB:CTCSADLGAALYF;TRA:CAAEKSNYNVLYF
clone_731_H11	clonotype1582H11	1	TRB:CTCSAGDSYEQYF;TRA:CAMDRTGGYKVVF
clone_732_H11	clonotype1583H11	1	TRB:CASSPRGTEVFF;TRA:CAVSSGSWQLIF
clone_733_H11	clonotype1584H11	1	TRB:CASSFGGQSNTEVFF;TRA:CADGSSGNKLIF
clone_734_H11	clonotype1585H11	1	TRB:CASSQEWGHSGNTLYF;TRA:CAASWDRIFF
clone_735_H11	clonotype1586H11	1	TRB:CASSRGQGNSGNTLYF;TRA:CALVVTGSGGKLTL
clone_736_H11	clonotype1587H11	1	TRB:CASSRGTGGSAETLYF;TRA:CAVEAAGNTGKLIF
clone_737_H11	clonotype1588H11	1	TRB:CASSATGDYAEQFF;TRA:CAVTSGSWQLIF
clone_738_H11	clonotype1589H11	1	TRB:CASSSDRGGTEVFF;TRA:CALSRALIF
clone_739_H11	clonotype1590H11	1	TRB:CASSSEVSNERLFF;TRA:CAAEAYQGGRALIF
clone_740_H11	clonotype1591H11	1	TRB:CASSSDWAQDTQYF;TRA:CAAEADNYAQGLTF
clone_741_H11	clonotype1592H11	1	TRB:CASSLEGGAYEQYF;TRA:CILRVGQQGTGSKLSF
clone_742_H11	clonotype1593H11	1	TRB:CASSLTGGNTEVFF;TRA:CALGNVGDNSKLIW;TRA:CAVSAPNNNAPRF
clone_743_H11	clonotype1596H11	1	TRB:CASSPTANTGQLYF;TRA:CAAEAGTGYQNFYF
clone_744_H11	clonotype1598H11	1	TRB:CASSPTINTGQLYF;TRA:CAAANSGTYQRF
clone_745_H11	clonotype1599H11	1	TRB:CASSRTNSNSDYTF;TRA:CAADQGGRALIF
clone_746_H11	clonotype1600H11	1	TRB:CASSLGGSGNTLYF;TRA:CAVSAGNNRIFF
clone_747_H11	clonotype1601H11	1	TRB:CASSFDWGGYEQYF;TRA:CAVSGSNNRIFF
clone_748_H11	clonotype1602H11	1	TRB:CASGDALGVNQDTQYF;TRA:CAASARGSAGNKLTF;TRA:CAMAHDSGYNKLTF
clone_749_H11	clonotype1603H11	1	TRB:CASSPPGQANTEVFF;TRA:CAIETSGGNYKPTF
clone_750_H11	clonotype1604H11	1	TRB:CASSQTGASAETLYF;TRA:CAAEAMSNYNVLYF
clone_751_H11	clonotype1605H11	1	TRB:CASSRTGRSAETLYF;TRA:CAAEAMSNYNVLYF
clone_752_H11	clonotype1606H11	1	TRB:CSSSQGGDQDTQYF;TRA:CANRNMGYKLTF
clone_753_H11	clonotype1607H11	1	TRB:CTCSAGLQDTQYF;TRA:CAGGTNAYKVIF
clone_754_H11	clonotype1609H11	1	TRB:CASSPSSYEQYF;TRA:CAVRDTGNYKYVF
clone_755_H11	clonotype1610H11	1	TRB:CASLGDWGNYAEQFF;TRA:CVWGNMGYKLTF
clone_756_H11	clonotype1611H11	1	TRB:CASRWRGANTEVFF;TRB:CASSQKGQGADERLFF;TRA:CAASDYSNNRLTL;TRA:CAASMRNSGTYQRF
clone_757_H11	clonotype1612H11	1	TRB:CASSLDWGQNTGQLYF;TRB:CAWSPDRGNSYNSPLYF;TRA:CALGGYKVVF
clone_758_H11	clonotype1613H11	1	TRB:CASSPGLNTGQLYF;TRA:CAVSENSGTYQRF
clone_759_H11	clonotype1614H11	1	TRB:CASSSGTGGYEQYF;TRA:CAVMNTGYQNFYF
clone_760_H11	clonotype1615H11	1	TRB:CASSLEGGQNTLYF;TRA:CAVSAGNNNAPRF
clone_761_H11	clonotype1616H11	1	TRB:CASSLGDSSYEQYF;TRA:CAASDNAGAKLTF
clone_762_H11	clonotype1617H11	1	TRB:CASSLQSSAETLYF;TRA:CALGDRGNNRIFF;TRA:CAVGNYNQGKLIF
clone_763_H11	clonotype1618H11	1	TRB:CASSLGDWGYEQYF;TRA:CAIDMNNNAGAKLTF
clone_764_H11	clonotype1619H11	1	TRB:CASSPDWGGAETLYF;TRA:CAVSRNYAQGLTF
clone_765_H11	clonotype161H11	1	TRB:CGARARVGSDYTF;TRA:CAVSAGNYKYVF
clone_766_H11	clonotype1620H11	1	TRB:CASSLTVSNERLFF;TRA:CAAGNSGGSNAKLTF
clone_767_H11	clonotype1621H11	1	TRB:CASRGQGGYAEQFF;TRA:CAAEAYTEGADRLTF
clone_768_H11	clonotype1622H11	1	TRB:CASSLRTGGARQYF;TRA:CAAESPNSAGNKLTF
clone_769_H11	clonotype1623H11	1	TRB:CASSFAGGEDTQYF;TRA:CALGTGGYKVVF;TRA:CALSDGTGGYKVVF
clone_770_H11	clonotype1625H11	1	TRB:CASSPSPSGNTLYF;TRA:CAAELTSGGNYKPTF
clone_771_H11	clonotype1626H11	1	TRB:CASSSTGGSYEQYF;TRA:CAVSTAGGYKVVF
clone_772_H11	clonotype1627H11	1	TRB:CASSLGDSSYEQYF;TRA:CAVRSTNAYKVIF
clone_773_H11	clonotype1628H11	1	TRB:CASSQDRGAGAEQFF;TRA:CALSVTNTGKLTF
clone_774_H11	clonotype1629H11	1	TRB:CASSQDLGGSYEQYF;TRA:CAVSANTNKVVF
clone_775_H11	clonotype1630H11	1	TRB:CASSPGTGGENTLYF;TRA:CALRANSGTYQRF
clone_776_H11	clonotype1631H11	1	TRB:CASSLGTTSAETLYF;TRA:CAGASSGSWQLIF
clone_777_H11	clonotype1632H11	1	TRB:CSSSHSDRAYEQYF;TRA:CAAEILSGSFNKLTF
clone_778_H11	clonotype1633H11	1	TRB:CTCSAYWGETLYF;TRA:CAAGEGQGTGSKLSF;TRA:CAVRFTGYQNFYF
clone_779_H11	clonotype1634H11	1	TRB:CTCSAAPQGPVFF;TRA:CAASEHDNNAPRF
clone_780_H11	clonotype1635H11	1	TRB:CTCSAGHNQAPLF;TRA:CAARGNSNNRIFF
clone_781_H11	clonotype1636H11	1	TRB:CASSRLGYNYAEQFF;TRA:CAASEGGRALIF
clone_782_H11	clonotype1637H11	1	TRB:CASSASGNYAEQFF;TRA:CAVSMPGGYKVVF
clone_783_H11	clonotype1638H11	1	TRB:CASSGQGRGDTQYF;TRA:CALGNYAQGLTF
clone_784_H11	clonotype1639H11	1	TRB:CASSLKGASTEVFF;TRA:CATDASTNAYKVIF
clone_785_H11	clonotype1640H11	1	TRB:CASSLAGGANTQYF;TRA:CAVSMPGGSAKLIF
clone_786_H11	clonotype1641H11	1	TRB:CASSLGRDYAEQFF;TRA:CVLGPNTNTGKLTF
clone_787_H11	clonotype1642H11	1	TRB:CASSLVRDTGQLYF;TRA:CALERGLSGSFNKLTF;TRA:CALRDRTGGYKVVF
clone_788_H11	clonotype1643H11	1	TRB:CASSLTGGAQEQYF;TRA:CAVSPTGSGGKLTL
clone_789_H11	clonotype1645H11	1	TRB:CASSSLGGSSYEQYF;TRA:CAVRESSGSWQLIF
clone_790_H11	clonotype1646H11	1	TRB:CASSLYWGVYAEQFF;TRB:CASSNRGANTEVFF;TRA:CVLGDPNTNKVVF
clone_791_H11	clonotype1647H11	1	TRB:CASSQGTGGVEQYF;TRA:CVLSGTGGYKVVF
clone_792_H11	clonotype1648H11	1	TRB:CASSPGTTNERLFF;TRA:CVLASSNTNKVVF
clone_793_H11	clonotype1649H11	1	TRB:CASSPDWGRYEQYF;TRA:CALPGNTGKLIF
clone_794_H11	clonotype1650H11	1	TRB:CASSLEGSNTEVFF;TRA:CAVSHNTNTGKLTF
clone_795_H11	clonotype1651H11	1	TRB:CASSLGRGQAEQFF;TRA:CAASGMSNYNVLYF
clone_796_H11	clonotype1652H11	1	TRB:CASGRESGNQAPLF;TRB:CASSLGWGVAEQFF;TRA:CALNQGGRALIF;TRA:CALSDRDQGGRALIF
clone_797_H11	clonotype1653H11	1	TRB:CASSLTGDYAEQFF;TRA:CAMERRRGANTGKLTF
clone_798_H11	clonotype1654H11	1	TRB:CASSTATNTGQLYF;TRA:CAMSEWSNYNVLYF
clone_799_H11	clonotype1656H11	1	TRB:CASSLTGMNTEVFF;TRA:CALSMDSNYQLIW
clone_800_H11	clonotype1658H11	1	TRB:CASSLTGTDYEQYF;TRA:CSASTNTNKVVF
clone_801_H11	clonotype1659H11	1	TRB:CASSLRGQNTEVFF;TRA:CAVSASSGSWQLIF
clone_802_H11	clonotype1660H11	1	TRB:CASSRTHSGNTLYF;TRA:CACNYGNEKITF
clone_803_H11	clonotype1661H11	1	TRB:CASSLTFNQDTQYF;TRA:CAVSMTGYNKLTF
clone_804_H11	clonotype1662H11	1	TRB:CASSFAGTNTEVFF;TRA:CAMRESSGSWQLIF
clone_805_H11	clonotype1663H11	1	TRB:CASSFGRSAETLYF;TRA:CAASEGADRLTF
clone_806_H11	clonotype1664H11	1	TRB:CASSPTSSGNTLYF;TRA:CAVKGSSGSWQLIF
clone_807_H11	clonotype1665H11	1	TRB:CASSLLGGQNTLYF;TRA:CAASEGYQNFYF
clone_808_H11	clonotype1666H11	1	TRB:CASSQTQGNYAEQFF;TRA:CALSDSLGNYQLIW
clone_809_H11	clonotype1667H11	1	TRB:CASSQEGTTNSDYTF;TRA:CAVSATTNTGKLTF
clone_810_H11	clonotype1668H11	1	TRB:CASSQDGRSNTEVFF;TRA:CALGGGNNRIFF
clone_811_H11	clonotype1671H11	1	TRB:CASSLLGGREDTQYF;TRB:CASSPSGEGNSDYTF;TRA:CAVSGSTGNYKYVF
clone_812_H11	clonotype1672H11	1	TRB:CASSRDWGNQDTQYF;TRA:CAVSIWNYAQGLTF
clone_813_H11	clonotype1673H11	1	TRB:CASSSRTGSSYEQYF;TRA:CAASEHDSNYQLIW
clone_814_H11	clonotype1674H11	1	TRB:CTCSGGDYAEQFF;TRA:CAAEADRGSALGRLHF
clone_815_H11	clonotype1675H11	1	TRB:CASSISAETLYF;TRA:CALRNSNNRIFF
clone_816_H11	clonotype1676H11	1	TRB:CASSMEGGTLYF;TRA:CAPFGSFNKLTF;TRA:CATVLDRGSALGRLHF
clone_817_H11	clonotype1677H11	1	TRB:CASSISGNTLYF;TRA:CAVDLPGTGSNRLTF
clone_818_H11	clonotype1678H11	1	TRB:CASSHDRANTGQLYF;TRA:CAVRYQGGRALIF
clone_819_H11	clonotype1679H11	1	TRB:CASSSGTGGNSDYTF;TRA:CAVSMDNYAQGLTF
clone_820_H11	clonotype1680H11	1	TRB:CASSWGTVSNERLFF;TRA:CVVGLSNYNVLYF
clone_821_H11	clonotype1681H11	1	TRB:CASSLFQGANSDYTF;TRA:CAMSLTSGGNYKPTF
clone_822_H11	clonotype1682H11	1	TRB:CASSQDGRGAAETLYF;TRA:CVLGSNYNQGKLIF
clone_823_H11	clonotype1683H11	1	TRB:CASSQETGGSAETLYF;TRA:CAVKMSNYNVLYF
clone_824_H11	clonotype1685H11	1	TRB:CASKPGQGNTGQLYF;TRB:CASSPWDSNSDYTF;TRA:CAVSMLSGSFNKLTF
clone_825_H11	clonotype1686H11	1	TRB:CASSLLGNQDTQYF;TRA:CAASERNYNQGKLIF
clone_826_H11	clonotype1687H11	1	TRB:CASSLEQGDTEVFF;TRA:CALSDSNNRIFF
clone_827_H11	clonotype1688H11	1	TRB:CASSLGGYNERLFF;TRA:CVLSAGASLGKLQF
clone_828_H11	clonotype1690H11	1	TRB:CASSRVGGGAETLYF;TRA:CALEGGTNTGKLTF
clone_829_H11	clonotype1691H11	1	TRB:CASSRGDSNERLFF;TRA:CVLSANYNQGKLIF
clone_830_H11	clonotype1692H11	1	TRB:CASSLRLNQDTQYF;TRA:CALYNTNTGKLTF
clone_831_H11	clonotype1693H11	1	TRB:CASSLDVGGYEQYF;TRA:CAARYQGGRALIF
clone_832_H11	clonotype1694H11	1	TRB:CASSLDRTGYEQYF;TRA:CVLSRTGNTGKLIF
clone_833_H11	clonotype1695H11	1	TRB:CASSLGTGGYEQYF;TRA:CALGDTGYQNFYF
clone_834_H11	clonotype1696H11	1	TRB:CASSLGGRNTEVFF;TRA:CAARSSSFSKLVF
clone_835_H11	clonotype1697H11	1	TRB:CASSRDSYNSPLYF;TRA:CAVSEAGNYKYVF
clone_836_H11	clonotype1698H11	1	TRB:CASSSTGVGNTLYF;TRA:CAASNTNTNKVVF
clone_837_H11	clonotype1699H11	1	TRB:CASSFRDSYAEQFF;TRB:CASSMGAHEQYF;TRA:CAVSMQQGTGSKLSF
clone_838_H11	clonotype1700H11	1	TRB:CASSFSGGGSDYTF;TRA:CAVSGENYNQGKLIF
clone_839_H11	clonotype1701H11	1	TRB:CASSGTGGYAEQFF;TRA:CAASSRGGYKVVF
clone_840_H11	clonotype1703H11	1	TRB:CASSLEGVPYEQYF;TRA:CALGPNAGAKLTF;TRA:CALSGSSNTNKVVF
clone_841_H11	clonotype1704H11	1	TRB:CASSTGTGGNQDTQYF;TRA:CASTGANTGKLTF
clone_842_H11	clonotype1705H11	1	TRB:CASGDVGLGGYAEQFF;TRA:CALGDQTGGYKVVF
clone_843_H11	clonotype1706H11	1	TRB:CASSPWDRANSDYTF;TRA:CALRSGSWQLIF
clone_844_H11	clonotype1707H11	1	TRB:CTCSAGGNYEQYF;TRA:CVLGDGGSALGRLHF
clone_845_H11	clonotype1708H11	1	TRB:CASTAWGYEQYF;TRA:CAASEPYGSSGNKLIF
clone_846_H11	clonotype1709H11	1	TRB:CASSLTGTNTGQLYF;TRA:CAVRRTGNTGKLIF
clone_847_H11	clonotype170H11	1	TRB:CASSSGGDTEVFF;TRA:CALERNAGAKLTF
clone_848_H11	clonotype1710H11	1	TRB:CASSLPTGASYEQYF;TRA:CAVSGYTGNYKYVF
clone_849_H11	clonotype1711H11	1	TRB:CASSQDWGINQDTQYF;TRA:CALSNYNQGKLIF
clone_850_H11	clonotype1712H11	1	TRB:CASSQDIRGFYAEQFF;TRA:CALDNNAGAKLTF
clone_851_H11	clonotype1714H11	1	TRB:CASSQGWGGGTGQLYF;TRA:CAASRGTNTGKLTF
clone_852_H11	clonotype1715H11	1	TRB:CASSSGISNERLFF;TRA:CAASATGGNNKLTF
clone_853_H11	clonotype1716H11	1	TRB:CASSPSGGYAEQFF;TRA:CAMSYYGNEKITF
clone_854_H11	clonotype1718H11	1	TRB:CASSSTGAQDTQYF;TRA:CALSASSGSWQLIF
clone_855_H11	clonotype1719H11	1	TRB:CASSFRKGNSDYTF;TRA:CAASIRGSALGRLHF;TRA:CALGAMSNYNVLYF
clone_856_H11	clonotype1720H11	1	TRB:CASSFGTDNERLFF;TRA:CAVSLLPGTGSNRLTF
clone_857_H11	clonotype1722H11	1	TRB:CASSLSGANTEVFF;TRA:CALGSSGSWQLIF
clone_858_H11	clonotype1723H11	1	TRB:CASSSGTANSDYTF;TRA:CALEGPGANTGKLTF
clone_859_H11	clonotype1724H11	1	TRB:CASSPQGWAETLYF;TRA:CALVRDYANKMIF
clone_860_H11	clonotype1725H11	1	TRB:CASSPWGGQNTLYF;TRA:CALGEDNYAQGLTF
clone_861_H11	clonotype1726H11	1	TRB:CASSLGQGGNTLYF;TRA:CALSDQRTGNTGKLIF
clone_862_H11	clonotype1727H11	1	TRB:CASSLGQGMDEQYF;TRA:CALRGWSNNRIFF
clone_863_H11	clonotype1728H11	1	TRB:CASGDGTGGRKDTQYF;TRB:CTCSARGGNTEVFF;TRA:CAAVTNSAGNKLTF
clone_864_H11	clonotype1729H11	1	TRB:CASSQGGGANERLFF;TRA:CAFNQGGSAKLIF
clone_865_H11	clonotype1731H11	1	TRB:CTCSAGNTGQLYF;TRA:CALGENNAGAKLTF
clone_866_H11	clonotype1732H11	1	TRB:CASSMDRGEQYF;TRA:CAVSSSNTGNYKYVF
clone_867_H11	clonotype1733H11	1	TRB:CASGDRLNTLYF;TRA:CALSDRDSGTYQRF
clone_868_H11	clonotype1734H11	1	TRB:CASSAPGQLYAEQFF;TRA:CALSEIGTNSAGNKLTF
clone_869_H11	clonotype1736H11	1	TRB:CASSRDWDSYEQYF;TRA:CAMRGTEGADRLTF
clone_870_H11	clonotype1738H11	1	TRB:CASSSGTGSYEQYF;TRA:CAMREGKNNNAPRF
clone_871_H11	clonotype1739H11	1	TRB:CASSSTGANERLFF;TRA:CAAVGGTQVVGQLTF
clone_872_H11	clonotype1740H11	1	TRB:CASRDWGTSQNTLYF;TRA:CALGMSNYNVLYF
clone_873_H11	clonotype1741H11	1	TRB:CASSFDWGQNTLYF;TRA:CALSDGTGNYKYVF
clone_874_H11	clonotype1742H11	1	TRB:CASSFGTGNQAPLF;TRA:CAASAEMDSNYQLIW
clone_875_H11	clonotype1743H11	1	TRB:CASSLDSANTEVFF;TRA:CALVAGTGGYKVVF
clone_876_H11	clonotype1744H11	1	TRB:CASGEDRGRGQNTLYF;TRA:CALVEGNMGYKLTF
clone_877_H11	clonotype1745H11	1	TRB:CASSEPGTGGSNERLFF;TRA:CALSYSSSSFSKLVF
clone_878_H11	clonotype1747H11	1	TRB:CASSFDRAGNQAPLF;TRA:CALGHNSNNRIFF
clone_879_H11	clonotype1748H11	1	TRB:CSSSPQASNERLFF;TRA:CALAANSGTYQRF
clone_880_H11	clonotype1749H11	1	TRB:CASSIGGNEQYF;TRA:CALSELSSGSWQLIF
clone_881_H11	clonotype174H11	1	TRB:CASSQSGGQDTQYF;TRA:CALSDDSNNRIFF
clone_882_H11	clonotype1750H11	1	TRB:CASSSDRINTEVFF;TRA:CALVRVNSAGNKLTF
clone_883_H11	clonotype1751H11	1	TRB:CASSLIRGQDTQYF;TRB:CASSPPGQGGKAPLF;TRA:CAASDYSNNRLTL;TRA:CAVSGHNVGDNSKLIW
clone_884_H11	clonotype1752H11	1	TRB:CASSLSAGNERLFF;TRA:CALSELMDSNYQLIW
clone_885_H11	clonotype1754H11	1	TRB:CASSPDWGGNYAEQFF;TRA:CALSDRDQGGSAKLIF
clone_886_H11	clonotype1755H11	1	TRB:CASSEWTGGGNYAEQFF;TRA:CALSDMNYNQGKLIF
clone_887_H11	clonotype1756H11	1	TRB:CASSPPGQGGKAPLF;TRA:CAVSGHNVGDNSKLIW
clone_888_H11	clonotype1757H11	1	TRB:CASSRDWGYAEQFF;TRA:CALGDPGFASALTF
clone_889_H11	clonotype1758H11	1	TRB:CASSQEGQGAETLYF;TRA:CAAMNNRIFF
clone_890_H11	clonotype1759H11	1	TRB:CASSRDWGAYEQYF;TRA:CAMREGRGNMGYKLTF
clone_891_H11	clonotype1760H11	1	TRB:CASSLSINQDTQYF;TRA:CAASANYNVLYF
clone_892_H11	clonotype1761H11	1	TRB:CASRQGLSNERLFF;TRB:CASSIARGDAEQFF;TRA:CAARTGGNNKLTF
clone_893_H11	clonotype1762H11	1	TRB:CASSQDLLGPGNTLYF;TRA:CAAPSSNTNKVVF
clone_894_H11	clonotype1763H11	1	TRB:CASSLEQGNTEVFF;TRA:CAATSNYNVLYF
clone_895_H11	clonotype1764H11	1	TRB:CASSLTGNSYEQYF;TRA:CAASGPSNYQLIW
clone_896_H11	clonotype1765H11	1	TRB:CASSLQNSGNTLYF;TRA:CAASAGNNNAPRF
clone_897_H11	clonotype1766H11	1	TRB:CASSTVGAPNERLFF;TRA:CAMREGNSGGSNAKLTF
clone_898_H11	clonotype1767H11	1	TRB:CASSTGQGSETLYF;TRA:CAASRQGGSAKLIF
clone_899_H11	clonotype1768H11	1	TRB:CASSPWTVQDTQYF;TRA:CAAGDSGGSNAKLTF
clone_900_H11	clonotype1769H11	1	TRB:CASGTGGNQNTLYF;TRB:CASSADRTNSDYTF;TRA:CAASADYAQGLTF
clone_901_H11	clonotype1770H11	1	TRB:CASSYGISNERLFF;TRA:CAASTGGNNKLTF
clone_902_H11	clonotype1772H11	1	TRB:CASSLVAGEDTQYF;TRA:CAARNTNTGKLTF
clone_903_H11	clonotype1773H11	1	TRB:CASSLEGAGGSLYF;TRA:CAASAKGGSAKLIF
clone_904_H11	clonotype1774H11	1	TRB:CASSLVWDSYEQYF;TRA:CAPRATSSGQKLVF
clone_905_H11	clonotype1775H11	1	TRB:CASSLSGGQDTQYF;TRA:CAASAGNYAQGLTF
clone_906_H11	clonotype1776H11	1	TRB:CASSRDWGSETLYF;TRA:CAASVYSGTYQRF
clone_907_H11	clonotype1777H11	1	TRB:CASSMTGPSYEQYF;TRA:CAARMNYAQGLTF
clone_908_H11	clonotype1778H11	1	TRB:CASSLGTGGNTLYF;TRA:CAASGIYNQGKLIF
clone_909_H11	clonotype1779H11	1	TRB:CASSQDWESSYEQYF;TRA:CAASASSGSWQLIF
clone_910_H11	clonotype1780H11	1	TRB:CASNNHWGQDTQYF;TRB:CASSQGSGGALEQYF;TRA:CAASGRGSNYKLTF
clone_911_H11	clonotype1781H11	1	TRB:CASRKGTYNYAEQFF;TRA:CAATSTNAYKVIF
clone_912_H11	clonotype1782H11	1	TRB:CASSSRGGAETLYF;TRA:CAASGASGSWQLIF
clone_913_H11	clonotype1783H11	1	TRB:CASSLGTNYAEQFF;TRA:CAAKGGTNAYKVIF
clone_914_H11	clonotype1784H11	1	TRB:CASSGLGDQNTLYF;TRA:CAASTTASLGKLQF
clone_915_H11	clonotype1785H11	1	TRB:CASSQEDWGSDTQYF;TRA:CAASWGGSALGRLHF
clone_916_H11	clonotype1786H11	1	TRB:CASSSDSNTGQLYF;TRA:CAASARDTNAYKVIF
clone_917_H11	clonotype1787H11	1	TRB:CASSNWGGENTLYF;TRA:CAASQDSGGSNYKLTF
clone_918_H11	clonotype1788H11	1	TRB:CASSPSGGYEQYF;TRB:CASSRTGGNERLFF;TRA:CAASAPGTGSNRLTF
clone_919_H11	clonotype1789H11	1	TRB:CASSSDWRSQNTLYF;TRA:CAASAGTQVVGQLTF
clone_920_H11	clonotype1790H11	1	TRB:CTCSARGVYEQYF;TRA:CAASGATGGNNKLTF
clone_921_H11	clonotype1791H11	1	TRB:CASSSGTGGYEQYF;TRA:CAASANSGGSNAKLTF
clone_922_H11	clonotype1792H11	1	TRB:CASSLPANTGQLYF;TRA:CALSVDSNNRIFF
clone_923_H11	clonotype1793H11	1	TRB:CASSDGGGWRAETLYF;TRB:CASSLTGGPNQDTQYF;TRA:CALSDRGNNNAPRF
clone_924_H11	clonotype1794H11	1	TRB:CASSLDWGGAEQFF;TRA:CALSDATEGADRLTF
clone_925_H11	clonotype1795H11	1	TRB:CASSLRTGQNTLYF;TRA:CALSDRGTGYQNFYF
clone_926_H11	clonotype1796H11	1	TRA:CAASENTGYQNFYF
clone_927_H11	clonotype1797H11	1	TRA:CAASDPEGADRLTF
clone_928_H11	clonotype1798H11	1	TRA:CAASATGGNNKLTF
clone_929_H11	clonotype1799H11	1	TRA:CAASATGGNNKLTF
clone_930_H11	clonotype179H11	1	TRB:CASSPDRKNTLYF;TRA:CAASMYNQGKLIF
clone_931_H11	clonotype1800H11	1	TRA:CAASGDSGYNKLTF
clone_932_H11	clonotype1801H11	1	TRB:CASSLDSSYEQYF
clone_933_H11	clonotype1802H11	1	TRB:CASRGQGAYEQYF
clone_934_H11	clonotype1803H11	1	TRB:CASSIQGAPEQYF
clone_935_H11	clonotype1804H11	1	TRB:CASSIEPNSDYTF
clone_936_H11	clonotype1805H11	1	TRB:CASSIVSQNTLYF
clone_937_H11	clonotype1806H11	1	TRB:CASSIAYNSPLYF
clone_938_H11	clonotype1807H11	1	TRB:CASSMRGRTEVFF
clone_939_H11	clonotype1808H11	1	TRB:CASSMASQNTLYF
clone_940_H11	clonotype1809H11	1	TRB:CASSHRGAETLYF
clone_941_H11	clonotype1810H11	1	TRB:CASSRRGGDTQYF
clone_942_H11	clonotype1811H11	1	TRB:CASSRDWGDEQYF
clone_943_H11	clonotype1812H11	1	TRA:CALSEGTGNYKYVF
clone_944_H11	clonotype1813H11	1	TRA:CALASSGSWQLIF
clone_945_H11	clonotype1814H11	1	TRA:CSATPSNMGYKLTF
clone_946_H11	clonotype1815H11	1	TRA:CAVSAGTGSNRLTF
clone_947_H11	clonotype1816H11	1	TRA:CAASGGSSGNKLIF
clone_948_H11	clonotype1817H11	1	TRA:CAASKSSGSWQLIF
clone_949_H11	clonotype1818H11	1	TRB:CASSKQGARDQNTLYF
clone_950_H11	clonotype1819H11	1	TRB:CASSLGDRNSGNTLYF
clone_951_H11	clonotype1820H11	1	TRB:CASSQERGGNSGNTLYF
clone_952_H11	clonotype1821H11	1	TRB:CASSQDLGGRGQNTLYF
clone_953_H11	clonotype1822H11	1	TRB:CASSQDLGGRGQNTLYF
clone_954_H11	clonotype1823H11	1	TRA:CAPLMSNYNVLYF
clone_955_H11	clonotype1824H11	1	TRA:CALSEKNAYKVIF
clone_956_H11	clonotype1825H11	1	TRA:CALSFNTNTGKLTF
clone_957_H11	clonotype1826H11	1	TRA:CALSGGGLSGKLTF
clone_958_H11	clonotype1827H11	1	TRA:CALGDMDYANKMIF
clone_959_H11	clonotype1828H11	1	TRB:CASRDWGGSYAEQFF
clone_960_H11	clonotype1829H11	1	TRB:CASSTGTGHNQAPLF
clone_961_H11	clonotype182H11	1	TRB:CASSPRQTYNSPLYF;TRA:CAMEKGADRLTF
clone_962_H11	clonotype1831H11	1	TRB:CASSADWGNYAEQFF
clone_963_H11	clonotype1832H11	1	TRB:CASSADWGNYAEQFF
clone_964_H11	clonotype1833H11	1	TRB:CASSADWGNYAEQFF
clone_965_H11	clonotype1834H11	1	TRB:CASSADWGNYAEQFF
clone_966_H11	clonotype1835H11	1	TRB:CASSSGGRIAETLYF
clone_967_H11	clonotype1836H11	1	TRB:CASSLRGTENTEVFF
clone_968_H11	clonotype1837H11	1	TRB:CASSLEWGGYAEQFF
clone_969_H11	clonotype1838H11	1	TRB:CASSLAGQGNSDYTF
clone_970_H11	clonotype1839H11	1	TRB:CASSLAGANTGQLYF
clone_971_H11	clonotype1840H11	1	TRB:CASSLGRVSGNTLYF
clone_972_H11	clonotype1842H11	1	TRB:CASSLGRVSGNTLYF
clone_973_H11	clonotype1843H11	1	TRB:CASSLGGGVAETLYF
clone_974_H11	clonotype1844H11	1	TRB:CASSLVPGSQNTLYF
clone_975_H11	clonotype1845H11	1	TRB:CASSKGLGGAETLYF
clone_976_H11	clonotype1846H11	1	TRB:CASSPDGISNERLFF
clone_977_H11	clonotype1847H11	1	TRB:CASSSGQGSAETLYF
clone_978_H11	clonotype1849H11	1	TRB:CASSLDPGGAREQYF
clone_979_H11	clonotype1850H11	1	TRB:CASSLDPGGAREQYF
clone_980_H11	clonotype1851H11	1	TRB:CASSLGGGGQDTQYF
clone_981_H11	clonotype1852H11	1	TRB:CASSLGGADTGQLYF
clone_982_H11	clonotype1854H11	1	TRB:CASSLVQGNYAEQFF
clone_983_H11	clonotype1855H11	1	TRB:CASSLAGISNERLFF
clone_984_H11	clonotype1856H11	1	TRB:CASSFLGVNYAEQFF
clone_985_H11	clonotype1857H11	1	TRB:CASSFGGGGAETLYF
clone_986_H11	clonotype1858H11	1	TRB:CASSLGHANTGQLYF
clone_987_H11	clonotype1859H11	1	TRB:CASSRRTGVYAEQFF
clone_988_H11	clonotype1860H11	1	TRB:CASSLRTHANSDYTF
clone_989_H11	clonotype1861H11	1	TRB:CASSLPGPSNSDYTF
clone_990_H11	clonotype1863H11	1	TRB:CASSLWDSPYAEQFF
clone_991_H11	clonotype1864H11	1	TRB:CASTLGLGGSYEQYF
clone_992_H11	clonotype1865H11	1	TRB:CASSPGTISNERLFF
clone_993_H11	clonotype1867H11	1	TRB:CASSFRRGGQNTLYF
clone_994_H11	clonotype1868H11	1	TRB:CASSFDWGNSYEQYF
clone_995_H11	clonotype186H11	1	TRB:CASSQELGSAETLYF;TRA:CALSEGTGYQNFYF
clone_996_H11	clonotype1870H11	1	TRB:CASSLRQGGNERLFF
clone_997_H11	clonotype1871H11	1	TRB:CASSLMGGSNERLFF
clone_998_H11	clonotype1872H11	1	TRB:CASSLLGLSAETLYF
clone_999_H11	clonotype1873H11	1	TRB:CASSDRPGGAGQDTQYF
clone_1000_H11	clonotype1874H11	1	TRB:CASSQPGQGSGNTLYF
clone_1001_H11	clonotype1875H11	1	TRB:CASSQDSWGVSYEQYF
clone_1002_H11	clonotype1877H11	1	TRB:CASSQAGQGAGTEVFF
clone_1003_H11	clonotype1878H11	1	TRB:CASSQAGQGAGTEVFF
clone_1004_H11	clonotype1879H11	1	TRB:CASSPPGLENTGQLYF
clone_1005_H11	clonotype1880H11	1	TRB:CSSSQMGVNYAEQFF
clone_1006_H11	clonotype1881H11	1	TRB:CSSSPTGWNTGQLYF
clone_1007_H11	clonotype1882H11	1	TRB:CTCSGDNSGNTLYF
clone_1008_H11	clonotype1883H11	1	TRB:CTCSDRQGQNTLYF
clone_1009_H11	clonotype1884H11	1	TRB:CTCSADNSAETLYF
clone_1010_H11	clonotype1885H11	1	TRB:CTCSADRQNTEVFF
clone_1011_H11	clonotype1886H11	1	TRB:CTCSADLGAETLYF
clone_1012_H11	clonotype1888H11	1	TRB:CTCSAARGDTEVFF
clone_1013_H11	clonotype1889H11	1	TRB:CTCSAGQNTGQLYF
clone_1014_H11	clonotype188H11	1	TRB:CASSLEGSQDTQYF;TRA:CALGQSNYNVLYF
clone_1015_H11	clonotype1890H11	1	TRB:CTCSAGTSGNTLYF
clone_1016_H11	clonotype1891H11	1	TRB:CTCSAGTGGRTLYF
clone_1017_H11	clonotype1892H11	1	TRB:CTCSAGERQDTQYF
clone_1018_H11	clonotype1893H11	1	TRB:CTCSATGENSPLYF
clone_1019_H11	clonotype1894H11	1	TRB:CTCSAGGRGAEQFF
clone_1020_H11	clonotype1895H11	1	TRB:CTCSGQDSAETLYF
clone_1021_H11	clonotype1896H11	1	TRB:CTCSGRDKNTEVFF
clone_1022_H11	clonotype1897H11	1	TRB:CTCSGTGAQNTLYF
clone_1023_H11	clonotype1898H11	1	TRA:CALEPITGNTGKLIF
clone_1024_H11	clonotype1899H11	1	TRB:CASSPRENTEVFF;TRA:CWGYAQGLTF
clone_1025_H11	clonotype1900H11	1	TRB:CASSLGTDTEVFF;TRA:CILRAGYQNFYF
clone_1026_H11	clonotype1901H11	1	TRB:CASSQDLGGRGQNTLYF;TRA:CATGSNNRIFF
clone_1027_H11	clonotype1902H11	1	TRB:CASSPDRDANSDYTF;TRA:CAISNNRIFF
clone_1028_H11	clonotype1903H11	1	TRB:CTCSTGSYNSPLYF;TRA:CAMVGNRIFF
clone_1029_H11	clonotype1904H11	1	TRB:CASSIRDKNTLYF;TRA:CAGTGKLTF
clone_1030_H11	clonotype1905H11	1	TRB:CASSDRGTSAETLYF;TRA:CAPDTNAYKVIF
clone_1031_H11	clonotype1906H11	1	TRB:CASSPTNYAEQFF;TRA:CAFLDYANKMIF
clone_1032_H11	clonotype1907H11	1	TRB:CASSFWGGSSAETLYF;TRA:CAARNSNNRIFF
clone_1033_H11	clonotype1908H11	1	TRB:CASSPGTGVRGEQFF;TRA:CIVTDRGYAQGLTF
clone_1034_H11	clonotype1909H11	1	TRB:CASSFYWGDYAEQFF;TRA:CILRSPSNTNKVVF
clone_1035_H11	clonotype1910H11	1	TRB:CTCSDRGANTEVFF;TRA:CAAATNTGKLTF
clone_1036_H11	clonotype1911H11	1	TRB:CTCSAPGQQNTLYF;TRA:CATAMSNYNVLYF
clone_1037_H11	clonotype1912H11	1	TRB:CASSRSNYAEQFF;TRA:CATPNYNQGKLIF
clone_1038_H11	clonotype1913H11	1	TRB:CASSLDLGGRREQYF;TRB:CASSLDRGRAETLYF;TRA:CAAEASNTGKLTF;TRA:CALSKNYAQGLTF
clone_1039_H11	clonotype1914H11	1	TRB:CASTRTGTTNERLFF;TRA:CAVTSNNRLTL
clone_1040_H11	clonotype1915H11	1	TRB:CASSRLGGNQDTQYF;TRA:CALERGNTNKVVF
clone_1041_H11	clonotype1916H11	1	TRB:CASSDPQGRSSGNTLYF;TRA:CAIFSGGNYKPTF;TRA:CAVEEMTNSAGNKLTF
clone_1042_H11	clonotype1917H11	1	TRB:CASGDAGGGGGQDTQYF;TRA:CAPESGSFNKLTF
clone_1043_H11	clonotype1918H11	1	TRB:CASSQERGPLGNTLYF;TRA:CAAEINGNEKITF
clone_1044_H11	clonotype1919H11	1	TRB:CSSSPGGARAETLYF;TRA:CAADGTGNYKYVF;TRA:CAMEASSGSWQLIF
clone_1045_H11	clonotype191H11	1	TRB:CASSFGGNSAETLYF;TRA:CAAEWMSNYNVLYF
clone_1046_H11	clonotype1920H11	1	TRB:CTCSGDISQNTLYF;TRA:CATSYGSSGNKLIF
clone_1047_H11	clonotype1921H11	1	TRB:CTCSGDRSSYEQYF;TRA:CAATGFASALTF;TRA:CAVSSSSGSWQLIF
clone_1048_H11	clonotype1922H11	1	TRB:CTCAPGQDTGQLYF;TRA:CAAEVGSNYQLIW
clone_1049_H11	clonotype1924H11	1	TRB:CASSLERGPNTEVFF;TRB:CASSRLGQDTQYF;TRA:CATGNYAQGLTF
clone_1050_H11	clonotype1925H11	1	TRB:CASSPEGVATGQLYF;TRA:CAATGGGGYKVVF;TRA:CALRLNYNVLYF
clone_1051_H11	clonotype1926H11	1	TRB:CASSLQGDGNSDYTF;TRA:CASNQGKLIF
clone_1052_H11	clonotype1927H11	1	TRB:CASSLSTGGGSDYTF;TRA:CAGNYNQGKLIF
clone_1053_H11	clonotype1928H11	1	TRB:CASSLEPGLGANTGQLYF;TRB:CASTPQTFNQDTQYF;TRA:CAGMSNYNVLYF
clone_1054_H11	clonotype1929H11	1	TRB:CASSQEGLENTGQLYF;TRA:CAAERGSALGRLHF;TRA:CALSDQNTGNYKYVF
clone_1055_H11	clonotype1930H11	1	TRB:CASSRGLGASAETLYF;TRA:CASHYNTNTGKLTF
clone_1056_H11	clonotype1931H11	1	TRB:CTCSARQGNQAPLF;TRA:CAVSSGSWQLIF
clone_1057_H11	clonotype1932H11	1	TRB:CTCSATGGDTEVFF;TRA:CAVDNAGAKLTF
clone_1058_H11	clonotype1933H11	1	TRB:CTCSGLASQNTLYF;TRA:CAAGEQGTGSKLSF;TRA:CAAPSGGSNAKLTF
clone_1059_H11	clonotype1934H11	1	TRB:CASNDNNNQAPLF;TRA:CAASINNRIFF
clone_1060_H11	clonotype1935H11	1	TRB:CASSTGVQDTQYF;TRB:CTCSAWASQNTLYF;TRA:CAAPMSNYNVLYF;TRA:CALSHTGSGGKLTL
clone_1061_H11	clonotype1936H11	1	TRB:CASSIPSNTEVFF;TRA:CAASMGSNNRIFF
clone_1062_H11	clonotype1937H11	1	TRB:CASSLTHPGGYEQYF;TRA:CSASHNYQLIW
clone_1063_H11	clonotype1938H11	1	TRB:CASSLEAGGRDTQYF;TRA:CAVSIPNTNKVVF
clone_1064_H11	clonotype1939H11	1	TRB:CASSLEDSANSDYTF;TRA:CALSANSNNRIFF
clone_1065_H11	clonotype1940H11	1	TRB:CASSSHRDNNQAPLF;TRA:CATEPSGSWQLIF
clone_1066_H11	clonotype1942H11	1	TRB:CASSRTGGSQNTLYF;TRA:CAMERQQGTGSKLSF
clone_1067_H11	clonotype1943H11	1	TRB:CASSPRLPSAETLYF;TRA:CAVSNMGYKLTF
clone_1068_H11	clonotype1944H11	1	TRB:CASSLPRERGTEVFF;TRA:CVLGFNYANKMIF
clone_1069_H11	clonotype1945H11	1	TRB:CASSFVGASQNTLYF;TRA:CALGTGNTGKLIF
clone_1070_H11	clonotype1946H11	1	TRB:CASSFWGASQNTLYF;TRA:CAVGTGSNRLTF
clone_1071_H11	clonotype1947H11	1	TRB:CASRKLGASSYEQYF;TRA:CAVSMNSGTYQRF
clone_1072_H11	clonotype1948H11	1	TRB:CASSQAGGRDYAEQFF;TRA:CALTHNNNNAPRF
clone_1073_H11	clonotype1949H11	1	TRB:CTCSADPRGYEQYF;TRA:CAVSGSNNRIFF
clone_1074_H11	clonotype1950H11	1	TRB:CASSLEDWDEQYF;TRB:CTCSADAQFTEVFF;TRA:CALEGGGRALIF
clone_1075_H11	clonotype1951H11	1	TRB:CTCSAVTRNTEVFF;TRA:CAVSALSNNRIFF
clone_1076_H11	clonotype1952H11	1	TRB:CTCSARVNQDTQYF;TRA:CATGTGNTGKLIF
clone_1077_H11	clonotype1953H11	1	TRB:CTCSAQGSGNTLYF;TRA:CAASTMGNNRIFF
clone_1078_H11	clonotype1954H11	1	TRB:CTCSARQGQDTQYF;TRA:CAPSNNRIFF
clone_1079_H11	clonotype1955H11	1	TRB:CASSFYWGGADAEQFF;TRB:CTCSGGPSNTEVFF;TRA:CAVSMGYQNFYF
clone_1080_H11	clonotype1956H11	1	TRB:CASSIGEDTEVFF;TRA:CALEGAGYQNFYF;TRA:CAVRDTEGADRLTF
clone_1081_H11	clonotype1957H11	1	TRB:CASSIWGDYEQYF;TRA:CAVSSNYGNEKITF
clone_1082_H11	clonotype1958H11	1	TRB:CASSMGTGAEVFF;TRA:CALSDYNVLYF
clone_1083_H11	clonotype1959H11	1	TRB:CASSIRQNTEVFF;TRA:CAASRDTGYQNFYF
clone_1084_H11	clonotype1960H11	1	TRB:CASSQRTGGANTGQLYF;TRB:CASSTGDWGEGQNTLYF;TRA:CAASEHGGNYQLIW
clone_1085_H11	clonotype1961H11	1	TRB:CASSLAGRDTGQLYF;TRB:CASSLGRASGNTLYF;TRA:CALVETQGGRALIF;TRA:CATDEGTGGYKVVF
clone_1086_H11	clonotype1962H11	1	TRB:CASSPQGATGNTLYF;TRA:CAVRDLGNTNTGKLTF
clone_1087_H11	clonotype1963H11	1	TRB:CASSSRDRANSDYTF;TRA:CAASGTSGSWQLIF
clone_1088_H11	clonotype1964H11	1	TRB:CASSSTGGNYAEQFF;TRA:CAVMSNYNVLYF
clone_1089_H11	clonotype1965H11	1	TRB:CASSLEPNSGNTLYF;TRA:CAVSAYNQGKLIF
clone_1090_H11	clonotype1966H11	1	TRB:CASSLETGRNSDYTF;TRA:CAASEGYSNNRLTL
clone_1091_H11	clonotype1967H11	1	TRB:CASSPRLGGLYEQYF;TRB:CTCSLGGRYAEQFF;TRA:CAASGTGTGSNRLTF;TRA:CALSPGGSNAKLTF
clone_1092_H11	clonotype1968H11	1	TRB:CASSPHREGTGQLYF;TRA:CAVMVNYNQGKLIF
clone_1093_H11	clonotype1970H11	1	TRB:CASSLDWGGAETLYF;TRB:CASSRTGGSSYEQYF;TRA:CAASETTGNYKYVF;TRA:CAVHDSGYNKLTF
clone_1094_H11	clonotype1971H11	1	TRB:CASSQDWGASSYEQYF;TRA:CALGDTSSGQKLVF;TRA:CALRRTGNTGKLIF
clone_1095_H11	clonotype1972H11	1	TRB:CASSQDLGQDSYEQYF;TRA:CAASRYAQGLTF
clone_1096_H11	clonotype1973H11	1	TRB:CSSSQEGGTAETLYF;TRA:CAAKYNQGKLIF
clone_1097_H11	clonotype1974H11	1	TRB:CSSSQSIEGYTEVFF;TRA:CAVSMRQGGRALIF
clone_1098_H11	clonotype1975H11	1	TRB:CSSSQSAGGSAEQFF;TRA:CALRNYAQGLTF
clone_1099_H11	clonotype1976H11	1	TRB:CSSSGGTPPNERLFF;TRA:CAVSIGNSGTYQRF
clone_1100_H11	clonotype1977H11	1	TRB:CTCSAGQVNSPLYF;TRA:CAASYYNQGKLIF;TRA:CALSRTGGYKVVF
clone_1101_H11	clonotype1978H11	1	TRB:CTCSAGRGLTEVFF;TRA:CALPSSGSFNKLTF
clone_1102_H11	clonotype1979H11	1	TRB:CTCSGRDKNTEVFF;TRA:CAASRVGDNSKLIW
clone_1103_H11	clonotype1980H11	1	TRB:CASSIRAQDTQYF;TRA:CAIDNNAGAKLTF;TRA:CALTRNNNNAPRF
clone_1104_H11	clonotype1981H11	1	TRB:CASRRDWGNYAEQFF;TRA:CAASTANYNVLYF
clone_1105_H11	clonotype1982H11	1	TRB:CASSPDWGNYAEQFF;TRA:CAVWGATNAYKVIF
clone_1106_H11	clonotype1983H11	1	TRB:CASSWTGGLRAEQFF;TRA:CALSDPAEGADRLTF
clone_1107_H11	clonotype1984H11	1	TRB:CASSLRWGSAETLYF;TRA:CAVSPYQGGRALIF
clone_1108_H11	clonotype1985H11	1	TRB:CASSLEASTNSDYTF;TRA:CAASMEVVGQLTF
clone_1109_H11	clonotype1986H11	1	TRB:CASSLASGGYAEQFF;TRA:CALSIGNYAQGLTF
clone_1110_H11	clonotype1987H11	1	TRB:CASSLSWGNYAEQFF;TRA:CAASGRGYQNFYF
clone_1111_H11	clonotype1988H11	1	TRB:CASSRDWGSAETLYF;TRA:CAVRTTASLGKLQF
clone_1112_H11	clonotype1989H11	1	TRB:CASSIEGVNSPLYF;TRB:CASSSWTGGSYEQYF;TRA:CALGEGSNYQLIW;TRA:CALSMSASLGKLQF
clone_1113_H11	clonotype1990H11	1	TRB:CASSLNWGGTGQLYF;TRA:CVLRFQGGSAKLIF
clone_1114_H11	clonotype1991H11	1	TRB:CASSRFGTGQDTQYF;TRA:CALGTGNTGKLIF;TRA:CAVSGSSSSFSKLVF
clone_1115_H11	clonotype1992H11	1	TRB:CASSTTGGANERLFF;TRA:CAASELNYNQGKLIF
clone_1116_H11	clonotype1993H11	1	TRB:CASSLGGAGTGQLYF;TRA:CAASKNSNNRIFF
clone_1117_H11	clonotype1994H11	1	TRB:CASSGRTGGFNQDTQYF;TRA:CAASLPGTGSNRLTF
clone_1118_H11	clonotype1995H11	1	TRB:CASSQDGSANTGQLYF;TRA:CALGLNYNQGKLIF;TRA:CAMERGGSALGRLHF
clone_1119_H11	clonotype1996H11	1	TRB:CTCSATTSQNTLYF;TRA:CAASNSAGNKLTF;TRA:CALWELASDSGYNKLTF
clone_1120_H11	clonotype1998H11	1	TRB:CASSRGAGNTLYF;TRA:CAASLNNAGAKLTF
clone_1121_H11	clonotype1999H11	1	TRB:CASSIRGYAEQFF;TRA:CALSEDTGNYKYVF
clone_1122_H11	clonotype2000H11	1	TRB:CASGDEAGGNTGQLYF;TRB:CASGHISNERLFF;TRA:CALGSGGNYKPTF
clone_1123_H11	clonotype2002H11	1	TRB:CASSYGTGGHSDYTF;TRA:CAVSLSNTGYQNFYF
clone_1124_H11	clonotype2003H11	1	TRB:CASSSQGNNQDTQYF;TRA:CAVSAGTNAYKVIF
clone_1125_H11	clonotype2004H11	1	TRB:CASSSDWGGTGQLYF;TRA:CAYITGNTGKLIF
clone_1126_H11	clonotype2005H11	1	TRB:CASSLEQGAGNTLYF;TRB:CASSLLGGADQDTQYF;TRA:CALSRLTSGGNYKPTF
clone_1127_H11	clonotype2006H11	1	TRB:CASSLAGRGQGEVFF;TRA:CALSEDSGTYQRF
clone_1128_H11	clonotype2007H11	1	TRB:CASSIASLYAEQFF;TRB:CASSQAGQGAGTEVFF;TRA:CAAGASQGGSAKLIF;TRA:CALSGGGLSGKLTF
clone_1129_H11	clonotype2008H11	1	TRB:CTCSATDSGNTLYF;TRA:CAASIKNSGTYQRF
clone_1130_H11	clonotype2010H11	1	TRB:CASSQEGLGGRQDTQYF;TRA:CALSESSGSWQLIF
clone_1131_H11	clonotype2011H11	1	TRB:CASSTTGASSYEQYF;TRA:CALSDQDYAQGLTF
clone_1132_H11	clonotype2012H11	1	TRB:CASSLTGGYNSPLYF;TRA:CALGGTNAYKVIF
clone_1133_H11	clonotype2013H11	1	TRB:CASGDPGQGADNQAPLF;TRA:CAMRPQGTGSKLSF
clone_1134_H11	clonotype2014H11	1	TRB:CASSLDGRGNYAEQFF;TRB:CTCSAGLGPYEQYF;TRA:CALALRTQVVGQLTF;TRA:CALGNSGGSNYKLTF
clone_1135_H11	clonotype2015H11	1	TRB:CTCSADRDQDTQYF;TRA:CVVGDRGSALGRLHF
clone_1136_H11	clonotype2016H11	1	TRB:CTCSGTGSQNTLYF;TRA:CALAPNMGYKLTF
clone_1137_H11	clonotype2017H11	1	TRB:CASSEQVSNERLFF;TRB:CASSLSGTAIGQLYF;TRA:CAVSLVTSGGNYKPTF
clone_1138_H11	clonotype2018H11	1	TRB:CASSQDAASSNERLFF;TRA:CALSLNVGDNSKLIW
clone_1139_H11	clonotype2019H11	1	TRB:CSSSLGLGVYAEQFF;TRA:CALGDRTGYQNFYF
clone_1140_H11	clonotype2020H11	1	TRB:CASSLRDNNNQAPLF;TRA:CAAADYANKMIF
clone_1141_H11	clonotype2021H11	1	TRB:CASSHGLGGRGAETLYF;TRA:CAAGDYANKMIF
clone_1142_H11	clonotype2022H11	1	TRB:CASSLGPGTGVTLYF;TRA:CAVRSNNRIFF
clone_1143_H11	clonotype2023H11	1	TRB:CTCSARHRGGEQYF;TRA:CAAGSGGSNAKLTF
clone_1144_H11	clonotype2024H11	1	TRB:CASSISSQNTLYF;TRA:CAANYQGGSAKLIF
clone_1145_H11	clonotype2025H11	1	TRB:CASSLARVANERLFF;TRA:CAATASSGSWQLIF
clone_1146_H11	clonotype2026H11	1	TRB:CASSFPGGGNTEVFF;TRA:CAASEGSALGRLHF
clone_1147_H11	clonotype2027H11	1	TRB:CASSFWGANTGQLYF;TRA:CAASGNTGYQNFYF
clone_1148_H11	clonotype2028H11	1	TRB:CASSQELGEGQDTQYF;TRA:CAAGANTEGADRLTF
clone_1149_H11	clonotype2029H11	1	TRB:CTCSADRDGFEQYF;TRA:CAASANTGYQNFYF
clone_1150_H11	clonotype202H11	1	TRB:CASSLGRRSQNTLYF;TRA:CALSDANSGTYQRF
clone_1151_H11	clonotype2030H11	1	TRB:CASSIDPGREQYF;TRA:CAASKGQGGSAKLIF
clone_1152_H11	clonotype2031H11	1	TRB:CASSPWQGGAETLYF;TRA:CAARNTEGADRLTF
clone_1153_H11	clonotype2032H11	1	TRB:CASSLEQTSQNTLYF;TRA:CAARRGSALGRLHF
clone_1154_H11	clonotype2033H11	1	TRB:CASSVPGQANTEVFF;TRA:CAASGHTGNYKYVF
clone_1155_H11	clonotype2034H11	1	TRB:CASSLLGGGAETLYF;TRA:CAASGSSALGRLHF
clone_1156_H11	clonotype2036H11	1	TRB:CASSRLGGGNTGQLYF;TRA:CAASGTGNTGKLIF
clone_1157_H11	clonotype2037H11	1	TRB:CASSPGTGRQDTQYF;TRA:CAASRGNTGGLSGKLTF
clone_1158_H11	clonotype2038H11	1	TRB:CTCSATGDNSPLYF;TRA:CAASATNTGANTGKLTF
clone_1159_H11	clonotype2039H11	1	TRB:CTCSGDRANTEVFF;TRA:CALSTQGGSAKLIF
clone_1160_H11	clonotype2040H11	1	TRB:CASSRDWGGNYAEQFF;TRA:CALSDHSSSFSKLVF
clone_1161_H11	clonotype2041H11	1	TRB:CASSLGQGYNSPLYF;TRA:CALSASYGSSGNKLIF
clone_1162_H11	clonotype2042H11	1	TRB:CATGDRGPNSDYTF
clone_1163_H11	clonotype2043H11	1	TRB:CASSKTGGSGQLYF
clone_1164_H11	clonotype2044H11	1	TRB:CASSIRGAQDTQYF
clone_1165_H11	clonotype2046H11	1	TRB:CASSIDWGSYEQYF
clone_1166_H11	clonotype2047H11	1	TRB:CASSIEGTNAEQFF
clone_1167_H11	clonotype2048H11	1	TRB:CASSIEGTNAEQFF
clone_1168_H11	clonotype2049H11	1	TRB:CASSIVGSQNTLYF
clone_1169_H11	clonotype2050H11	1	TRB:CASSIWGAHAEQFF
clone_1170_H11	clonotype2051H11	1	TRB:CASSIWGGYAEQFF
clone_1171_H11	clonotype2052H11	1	TRB:CASSIWGGYAEQFF
clone_1172_H11	clonotype2053H11	1	TRB:CASSIRDRGYEQYF
clone_1173_H11	clonotype2054H11	1	TRB:CASSIGTGSYEQYF
clone_1174_H11	clonotype2055H11	1	TRB:CASSISSSGNTLYF
clone_1175_H11	clonotype2056H11	1	TRB:CASSICRVTERLFF
clone_1176_H11	clonotype2057H11	1	TRB:CASSPRQGRDTQYF
clone_1177_H11	clonotype2058H11	1	TRB:CASSLQGGQNTLYF
clone_1178_H11	clonotype2059H11	1	TRB:CASSWDSANTEVFF
clone_1179_H11	clonotype2060H11	1	TRA:CALRWKGGSAKLIF
clone_1180_H11	clonotype2061H11	1	TRA:CAVSEGGSALGRLHF
clone_1181_H11	clonotype2062H11	1	TRA:CAASMTNSAGNKLTF
clone_1182_H11	clonotype2063H11	1	TRA:CALRNQGGSAKLIF
clone_1183_H11	clonotype2064H11	1	TRA:CALSDHNMGYKLTF
clone_1184_H11	clonotype2065H11	1	TRA:CAMREGYANKMIF
clone_1185_H11	clonotype2066H11	1	TRA:CALGEATGGNNKLTF
clone_1186_H11	clonotype2067H11	1	TRA:CALGDPNSAGNKLTF
clone_1187_H11	clonotype2068H11	1	TRB:CASSSTGGVTTGQLYF
clone_1188_H11	clonotype2069H11	1	TRB:CASSSDWGGNYAEQFF
clone_1189_H11	clonotype2070H11	1	TRB:CASSSDWGGNYAEQFF
clone_1190_H11	clonotype2071H11	1	TRB:CASSSGRDGYTGQLYF
clone_1191_H11	clonotype2072H11	1	TRB:CASSLGGLGNYAEQFF
clone_1192_H11	clonotype2073H11	1	TRB:CASSSGTGGNTGQLYF
clone_1193_H11	clonotype2074H11	1	TRB:CASSSGLGPSQNTLYF
clone_1194_H11	clonotype2075H11	1	TRB:CASSWDRGRSQNTLYF
clone_1195_H11	clonotype2076H11	1	TRB:CASSLLGGYNYAEQFF
clone_1196_H11	clonotype2077H11	1	TRB:CASSLLGGYNYAEQFF
clone_1197_H11	clonotype2078H11	1	TRB:CASSLLGGYNYAEQFF
clone_1198_H11	clonotype2079H11	1	TRB:CASSLLGGYNYAEQFF
clone_1199_H11	clonotype2081H11	1	TRB:CASSLDLWGGYAEQFF
clone_1200_H11	clonotype2082H11	1	TRB:CASSPTGLGGNERLFF
clone_1201_H11	clonotype2083H11	1	TRB:CASSLLGGYNYAEQFF
clone_1202_H11	clonotype2084H11	1	TRB:CASSSDWGGAGQNTLYF
clone_1203_H11	clonotype2085H11	1	TRA:CALTRNNNNAPRF
clone_1204_H11	clonotype2086H11	1	TRB:CSSSQSKGQSSYEQYF
clone_1205_H11	clonotype2088H11	1	TRB:CTCSARDRNTGQLYF
clone_1206_H11	clonotype2089H11	1	TRB:CTCSARDRGNTEVFF
clone_1207_H11	clonotype2090H11	1	TRB:CTCSADLRIKSEVFF
clone_1208_H11	clonotype2091H11	1	TRB:CTCSADLRIKSEVFF
clone_1209_H11	clonotype2093H11	1	TRB:CTCSADFSPGERLFF
clone_1210_H11	clonotype2095H11	1	TRB:CTCSAVRGRGDTQYF
clone_1211_H11	clonotype2097H11	1	TRB:CTCSATGGSQDTQYF
clone_1212_H11	clonotype2098H11	1	TRB:CTCSGYWGNQDTQYF
clone_1213_H11	clonotype2099H11	1	TRB:CTCSADNWGGETLYF;TRA:CILQGTGSKLSF
clone_1214_H11	clonotype2100H11	1	TRB:CARGLQNTLYF;TRB:CASSIGGADTEVFF;TRA:CILRVNYAQGLTF
clone_1215_H11	clonotype2101H11	1	TRB:CASSLGDRAYNSPLYF;TRA:CERDMGYKLTF
clone_1216_H11	clonotype2102H11	1	TRB:CTCSAETGVAETLYF;TRA:CAIGNYNVLYF
clone_1217_H11	clonotype2103H11	1	TRB:CASSIDLNQDTQYF;TRA:CALVNYAQGLTF
clone_1218_H11	clonotype2104H11	1	TRB:CASSMGQGASDYTF;TRA:CIVTDQDSGTYQRF
clone_1219_H11	clonotype2106H11	1	TRB:CASSLGTGGDSYEQYF;TRA:CAVSDNRIFF
clone_1220_H11	clonotype2107H11	1	TRB:CTCSAEDIYNSPLYF;TRA:CAANYNQGKLIF;TRA:CAATSNTNKVVF
clone_1221_H11	clonotype2108H11	1	TRB:CTCSGQGGSGNTLYF;TRA:CAANYNQGKLIF
clone_1222_H11	clonotype2109H11	1	TRB:CASRPGLGGVEQYF;TRB:CASSLTPNRGNSPLYF;TRA:CAAEATNAYKVIF
clone_1223_H11	clonotype2110H11	1	TRB:CAKLGGPNTEVFF;TRB:CASSDWGGAETLYF;TRA:CALERNNNNAPRF
clone_1224_H11	clonotype2111H11	1	TRB:CASSSGTGGNTLYF;TRA:CAAVHNAGAKLTF
clone_1225_H11	clonotype2112H11	1	TRB:CASSSLWGSSAETLYF;TRA:CAMRGSAKLIF
clone_1226_H11	clonotype2113H11	1	TRB:CASSLVGGWGQNTLYF;TRA:CILRVGGTGYQNFYF
clone_1227_H11	clonotype2114H11	1	TRB:CTCSAEGGLQNTLYF;TRA:CAVGSFNKLTF
clone_1228_H11	clonotype2115H11	1	TRB:CTCSADDYNNQAPLF;TRA:CILRGLTGNTGKLIF
clone_1229_H11	clonotype2116H11	1	TRB:CTCSAVGQGDQAPLF;TRA:CAVGSNNRIFF
clone_1230_H11	clonotype2117H11	1	TRB:CASSIAAGQYEQYF;TRA:CALDASNMGYKLTF
clone_1231_H11	clonotype2118H11	1	TRB:CASSIGTGWDTQYF;TRA:CALAPEGADRLTF;TRA:CVLYTGANTGKLTF
clone_1232_H11	clonotype2120H11	1	TRB:CASSLARQLSNERLFF;TRA:CAAVPNTNKVVF
clone_1233_H11	clonotype2121H11	1	TRB:CASSLSRGAANERLFF;TRA:CASTSSGQKLVF
clone_1234_H11	clonotype2122H11	1	TRB:CASSLDRAFYNSPLYF;TRB:CASSPDRPYSGNTLYF;TRA:CAVRQGGRALIF
clone_1235_H11	clonotype2123H11	1	TRB:CTCSAEGQGGTEVFF;TRA:CAASKRYNVLYF
clone_1236_H11	clonotype2124H11	1	TRB:CASSLAFYEQYF;TRB:CTCSADTGRTERLFF;TRA:CALSNRIFF
clone_1237_H11	clonotype2125H11	1	TRB:CTCSAYRLSGNTLYF;TRA:CAMEQQGTGSKLSF
clone_1238_H11	clonotype2126H11	1	TRB:CASTPGQGWAEQFF;TRA:CALRDTNAYKVIF
clone_1239_H11	clonotype2127H11	1	TRB:CASSIEDRVNTQYF;TRA:CALSRYSNNRLTL
clone_1240_H11	clonotype2128H11	1	TRB:CASSIFGYNQAPLF;TRA:CAVSRNSNNRIFF
clone_1241_H11	clonotype2129H11	1	TRB:CASSIWGANSDYTF;TRA:CAFMNYNQGKLIF
clone_1242_H11	clonotype2130H11	1	TRB:CASSIRGDNSPLYF;TRA:CAVASSGSWQLIF
clone_1243_H11	clonotype2131H11	1	TRB:CASSFDRENQAPLF;TRA:CALILYSNNRLTL
clone_1244_H11	clonotype2132H11	1	TRB:CASSLLRQGGAETLYF;TRA:CAVSAQSNNRIFF
clone_1245_H11	clonotype2133H11	1	TRB:CTCSETGGAPGQLYF;TRA:CAAEDASSGSWQLIF
clone_1246_H11	clonotype2134H11	1	TRB:CTCSADAGAGAEQFF;TRA:CAVGPGGNYKPTF
clone_1247_H11	clonotype2135H11	1	TRB:CTCSATGIGAETLYF;TRA:CAASINMGYKLTF
clone_1248_H11	clonotype2136H11	1	TRB:CASSTTGGARAETLYF;TRA:CAASGTGNTGKLIF
clone_1249_H11	clonotype2137H11	1	TRB:CASSRDWGGLQDTQYF;TRB:CTCSDDWVSQNTLYF;TRA:CAASDRAGTGSNRLTF;TRA:CVLRNTNTGKLTF
clone_1250_H11	clonotype2138H11	1	TRB:CASSSDWGGNYAEQFF;TRA:CALSYGSSGNKLIF
clone_1251_H11	clonotype2139H11	1	TRB:CASSLDGGANYAEQFF;TRA:CAASEAGNTGKLIF
clone_1252_H11	clonotype2140H11	1	TRB:CASSKGDSGNTLYF;TRA:CAASRQGGRALIF
clone_1253_H11	clonotype2141H11	1	TRB:CASSIEQANTEVFF;TRA:CVLSAGSALGRLHF
clone_1254_H11	clonotype2142H11	1	TRB:CASSLQGGAETLYF;TRA:CAASMAGYQNFYF
clone_1255_H11	clonotype2143H11	1	TRB:CASSLGWGANTGQLYF;TRA:CAPGDYSNNRLTL
clone_1256_H11	clonotype2144H11	1	TRB:CASSQDLGNSYNSPLYF;TRA:CVLGDNSAGNKLTF
clone_1257_H11	clonotype2145H11	1	TRB:CTCSADWGNYAEQFF;TRA:CAATPSNTNKVVF
clone_1258_H11	clonotype2146H11	1	TRB:CTCSADNRGNQAPLF;TRA:CALKGTGGYKVVF
clone_1259_H11	clonotype2147H11	1	TRB:CASSQASRDWGVAETLYF;TRA:CALGASSGSWQLIF
clone_1260_H11	clonotype2148H11	1	TRB:CASSPGTGGRQNTLYF;TRA:CALITGGSNAKLTF;TRA:CALVKSSGSWQLIF
clone_1261_H11	clonotype2149H11	1	TRB:CASSLYWGGGYAEQFF;TRA:CAASITGNTGKLIF
clone_1262_H11	clonotype2150H11	1	TRB:CASSLDSPRDRDTQYF;TRA:CAVSEGGSNAKLTF
clone_1263_H11	clonotype2151H11	1	TRB:CASSQEGLGSSQNTLYF;TRA:CALVPDTNAYKVIF
clone_1264_H11	clonotype2152H11	1	TRB:CASSQDPGTGVWNTLYF;TRA:CVLGGGRGSALGRLHF
clone_1265_H11	clonotype2154H11	1	TRB:CASSPGTGYAEQFF;TRA:CAMREGRNNNAPRF
clone_1266_H11	clonotype2155H11	1	TRB:CASGQGWNYAEQFF;TRA:CAMSPSGGSNYKLTF
clone_1267_H11	clonotype2156H11	1	TRB:CASSFLGGYNYAEQFF;TRA:CAMREGSGGNNKLTF
clone_1268_H11	clonotype2158H11	1	TRB:CTCSAEGLGEDTQYF;TRA:CALREASSGSWQLIF
clone_1269_H11	clonotype2159H11	1	TRB:CTCSADWGGSYEQYF;TRA:CALGDHTNTGKLTF
clone_1270_H11	clonotype2160H11	1	TRB:CASSSRDRDSDYTF;TRA:CALGDLTSGGNYKPTF
clone_1271_H11	clonotype2161H11	1	TRB:CTCSAGTGGSYEQYF;TRA:CALGGLANSAGNKLTF
clone_1272_H11	clonotype2163H11	1	TRB:CASSKTGGRNTGQLYF;TRA:CAARMDYANKMIF
clone_1273_H11	clonotype2164H11	1	TRB:CASTRDRGQNTLYF;TRA:CAAIGNYAQGLTF
clone_1274_H11	clonotype2165H11	1	TRB:CASSIAWVFYEQYF;TRA:CAAGASGGSNYKLTF
clone_1275_H11	clonotype2166H11	1	TRB:CASSPPGLRNTGQLYF;TRA:CAASASGSFNKLTF
clone_1276_H11	clonotype2167H11	1	TRB:CASSLGTHLSNERLFF;TRA:CAASPLNNYAQGLTF
clone_1277_H11	clonotype2168H11	1	TRB:CASSTGTGAYEQYF;TRA:CALIPNTGYQNFYF
clone_1278_H11	clonotype2169H11	1	TRB:CASRLQGFSNERLFF
clone_1279_H11	clonotype2170H11	1	TRB:CASSIDLSGNTEVFF
clone_1280_H11	clonotype2171H11	1	TRB:CASSIAGQGTETLYF
clone_1281_H11	clonotype2172H11	1	TRB:CASSIGRVYNSPLYF
clone_1282_H11	clonotype2173H11	1	TRB:CASSIGTGSAETLYF
clone_1283_H11	clonotype2174H11	1	TRB:CASSMGRTGSAEQFF
clone_1284_H11	clonotype2175H11	1	TRB:CASSPGGALQNTLYF
clone_1285_H11	clonotype2176H11	1	TRB:CASSRLGGSQNTLYF
clone_1286_H11	clonotype2177H11	1	TRB:CASSLWGINYAEQFF
clone_1287_H11	clonotype2180H11	1	TRA:CALSDSSSGSWQLIF
clone_1288_H11	clonotype2181H11	1	TRA:CALGDLLNTNTGKLTF
clone_1289_H11	clonotype2182H11	1	TRB:CASSLGTGGLSAETLYF
clone_1290_H11	clonotype2183H11	1	TRB:CASSLDSGLGGRGTQYF
clone_1291_H11	clonotype2184H11	1	TRB:CASSLELGPFNQDTQYF
clone_1292_H11	clonotype2185H11	1	TRB:CASSLSMSGASGNTLYF
clone_1293_H11	clonotype2186H11	1	TRA:CALGPNYNQGKLIF
clone_1294_H11	clonotype2187H11	1	TRA:CALGEGTNAYKVIF
clone_1295_H11	clonotype2188H11	1	TRB:CTCSAEDWGSQNTLYF
clone_1296_H11	clonotype2189H11	1	TRB:CTCSADKTGGNSPLYF
clone_1297_H11	clonotype2190H11	1	TRB:CTCSADNGISNERLFF
clone_1298_H11	clonotype2191H11	1	TRB:CTCSADTGASQNTLYF
clone_1299_H11	clonotype2192H11	1	TRB:CTCSADLQENYAEQFF
clone_1300_H11	clonotype2193H11	1	TRB:CTCSADWGGRYAEQFF
clone_1301_H11	clonotype2194H11	1	TRB:CTCSAVGTGVGNTLYF
clone_1302_H11	clonotype2195H11	1	TRB:CTCSAQTGGAGTEVFF
clone_1303_H11	clonotype2196H11	1	TRB:CTCSAVQNSYNSPLYF
clone_1304_H11	clonotype2197H11	1	TRB:CTCSVGLGGGQDTQYF
clone_1305_H11	clonotype2198H11	1	TRB:CASSRDWASAETLYF;TRA:CALEPGYQNFYF
clone_1306_H11	clonotype2199H11	1	TRB:CASSSGLGGRSSYEQYF;TRA:CALEKGGRALIF
clone_1307_H11	clonotype219H11	1	TRB:CASGETANSDYTF;TRA:CAMGGNYAQGLTF
clone_1308_H11	clonotype2200H11	1	TRB:CTCSAELGANTGQLYF;TRA:CAFMSNYNVLYF
clone_1309_H11	clonotype2202H11	1	TRB:CASSTRGFNQDTQYF;TRA:CAMERNSNNRIFF
clone_1310_H11	clonotype2203H11	1	TRB:CASSIRTGGSYEQYF;TRA:CAVRNTGKLTF
clone_1311_H11	clonotype2204H11	1	TRB:CASSIRDWDLYEQYF;TRA:CATDAASNYNVLYF;TRA:CAVSMGYSNNRLTL
clone_1312_H11	clonotype2205H11	1	TRB:CASSPGTGSQNTLYF;TRA:CALRNSNNRIFF
clone_1313_H11	clonotype2206H11	1	TRB:CASSIRDRGDTEVFF;TRA:CAANTGANTGKLTF
clone_1314_H11	clonotype2207H11	1	TRB:CASSMGQGYQNTLYF;TRA:CALWQGGRALIF
clone_1315_H11	clonotype2208H11	1	TRB:CTCSADAVYNYAEQFF;TRA:CASGGTGGYKVVF
clone_1316_H11	clonotype2209H11	1	TRB:CTCSAGTGWGTGQLYF;TRA:CALRGNSNNRIFF
clone_1317_H11	clonotype220H11	1	TRB:CAAGGGRSYEQYF;TRB:CASGDAAWGGYAEQFF;TRA:CALSLSGSFNKLTF
clone_1318_H11	clonotype2211H11	1	TRB:CASSQKLGGRGQDTQYF;TRA:CAASMTNYNVLYF;TRA:CAVTFTGSGGKLTL
clone_1319_H11	clonotype2212H11	1	TRB:CASSLSWGGSDTGQLYF;TRA:CAVSADYGNEKITF
clone_1320_H11	clonotype2213H11	1	TRB:CASGAGATGQLYF;TRB:CASGEGQYEQYF;TRA:CAVPHDTNAYKVIF
clone_1321_H11	clonotype2214H11	1	TRB:CTCSATGQTNTGQLYF;TRA:CAVSMSNYNVLYF
clone_1322_H11	clonotype2215H11	1	TRB:CASSPGTGGYAEQFF;TRA:CAVSDGSFNKLTF
clone_1323_H11	clonotype2216H11	1	TRB:CASSFGRLGGAQNTLYF;TRA:CAVKGYSNNRLTL
clone_1324_H11	clonotype2217H11	1	TRB:CASSKDWGNYAEQFF;TRA:CAVSMYTGANTGKLTF
clone_1325_H11	clonotype2218H11	1	TRB:CASSITQGAGERLFF;TRA:CAASTTEGADRLTF
clone_1326_H11	clonotype2219H11	1	TRB:CASSMGWESSYEQYF;TRA:CAASSQYGSSGNKLIF
clone_1327_H11	clonotype2220H11	1	TRB:CASSIWGSSAETLYF;TRA:CALSVNTGNYKYVF
clone_1328_H11	clonotype2221H11	1	TRB:CASSLVGGAQGAETLYF;TRA:CAMREGLNNNAPRF
clone_1329_H11	clonotype2222H11	1	TRB:CASSLRLGGRGAETLYF;TRA:CAMREVYNNNAPRF
clone_1330_H11	clonotype2223H11	1	TRB:CASSIGGGGQDTQYF;TRA:CAMRENTGYQNFYF
clone_1331_H11	clonotype2224H11	1	TRB:CASGTGDPYNSPLYF;TRA:CALGDWDTNAYKVIF
clone_1332_H11	clonotype2225H11	1	TRB:CASSYYWGGAGQNTLYF;TRA:CALVDYGSSGNKLIF
clone_1333_H11	clonotype2226H11	1	TRB:CASSPGFTGLNYAEQFF;TRA:CAAGEEGTGSKLSF
clone_1334_H11	clonotype2227H11	1	TRB:CASSLARRGSNTGQLYF;TRA:CAASNMGYKLTF
clone_1335_H11	clonotype2228H11	1	TRB:CTCSAGGLISNERLFF;TRA:CAASAGSGGKLTL
clone_1336_H11	clonotype2229H11	1	TRB:CASSIGQGSGNTLYF;TRA:CAAGASGGNYKPTF
clone_1337_H11	clonotype222H11	1	TRB:CASSRLGGDWEQYF;TRA:CAMRDTEGADRLTF
clone_1338_H11	clonotype2231H11	1	TRB:CASSFPSGAANTGQLYF;TRA:CAASVGTGGLSGKLTF
clone_1339_H11	clonotype2232H11	1	TRB:CASSIRGTGNTGQLYF
clone_1340_H11	clonotype2233H11	1	TRB:CASSIAHRDYNSPLYF
clone_1341_H11	clonotype2235H11	1	TRA:CAMREGGTGGYKVVF
clone_1342_H11	clonotype2236H11	1	TRB:CASGGQNYAEQFF
clone_1343_H11	clonotype2237H11	1	TRB:CASSIKRTGRGNTLYF;TRA:CAIDRSGSWQLIF;TRA:CALGASGYNKLTF
clone_1344_H11	clonotype2240H11	1	TRB:CASRSGTGEGIWNSPLYF;TRA:CAIDYGSSGNKLIF
clone_1345_H11	clonotype2241H11	1	TRB:CASSPLGGISNERLFF;TRA:CAVRDTNAYKVIF
clone_1346_H11	clonotype2242H11	1	TRB:CASSLLWTGGALAETLYF;TRA:CALSDGMGYKLTF
clone_1347_H11	clonotype2243H11	1	TRB:CASSIRAGGSQNTLYF;TRA:CALSDSNNRIFF
clone_1348_H11	clonotype2244H11	1	TRB:CTCSAPRGRISNERLFF;TRA:CAASHNAGAKLTF
clone_1349_H11	clonotype2245H11	1	TRB:CASSIERAGEGAEQFF;TRA:CALNSGGSNYKLTF
clone_1350_H11	clonotype2246H11	1	TRB:CASSIDGAGSAETLYF;TRA:CALRNYNQGKLIF
clone_1351_H11	clonotype2247H11	1	TRB:CASSSSGTISNERLFF;TRA:CALSAPISNNRIFF
clone_1352_H11	clonotype2248H11	1	TRB:CASSLDHWGASNTGQLYF;TRA:CALSKRGSALGRLHF
clone_1353_H11	clonotype2249H11	1	TRB:CASGQGNNQAPLF;TRA:CALVRTNAYKVIF
clone_1354_H11	clonotype2250H11	1	TRB:CTCSADPGTVNNQAPLF;TRA:CAPSSSNTNKVVF
clone_1355_H11	clonotype2251H11	1	TRB:CTCSADWTGGSNERLFF;TRA:CAASYGSSGNKLIF
clone_1356_H11	clonotype2252H11	1	TRB:CTCSGPGLGANTGQLYF;TRA:CVVGDRGSALGRLHF
clone_1357_H11	clonotype2253H11	1	TRB:CTCSADRGGTGAETLYF;TRA:CAASGSAGNKLTF
clone_1358_H11	clonotype2254H11	1	TRB:CASSIAPTGGGAETLYF
clone_1359_H11	clonotype2255H11	1	TRB:CASGELGVQDTQYF
clone_1360_H11	clonotype2256H11	1	TRB:CASGDEQGGYEQYF
clone_1361_H11	clonotype2257H11	1	TRB:CASGDAPGFDTQYF
clone_1362_H11	clonotype2259H11	1	TRB:CASGATGANF
clone_1363_H11	clonotype2260H11	1	TRB:CASGEDTQYF
clone_1364_H11	clonotype2261H11	1	TRB:CASGENSYNSPLYF;TRA:CAAGSNTNKVVF
clone_1365_H11	clonotype2262H11	1	TRB:CASFQNTLYF;TRA:CAALDSNYQLIW
clone_1366_H11	clonotype2263H11	1	TRB:CASSIDGLGGYQNTLYF;TRA:CAVDGQGGRALIF
clone_1367_H11	clonotype2264H11	1	TRB:CASGDAEVFF;TRA:CAIDMSNYNVLYF
clone_1368_H11	clonotype2265H11	1	TRB:CASGQDTQYF;TRA:CALSLNTGNYKYVF
clone_1369_H11	clonotype2266H11	1	TRB:CASSLGGVFF;TRA:CAVDTNAYKVIF
clone_1370_H11	clonotype2267H11	1	TRB:CASSLYEQYF;TRA:CAVSMGSGSWQLIF
clone_1371_H11	clonotype2268H11	1	TRB:CASSLERLFF;TRA:CAVSMDNYAQGLTF
clone_1372_H11	clonotype2269H11	1	TRB:CASGDRTFNTEVFF;TRA:CAAENTNTGKLTF;TRA:CAASNFSGSWQLIF
clone_1373_H11	clonotype226H11	1	TRB:CASGGTGGVYEQYF;TRA:CALRDYTGGNNKLTF;TRA:CALSGDSGYNKLTF
clone_1374_H11	clonotype2270H11	1	TRB:CASGGGPAGDTLYF;TRB:CASSPRQGRGTEVFF;TRA:CAMREGMGYKLTF;TRA:CAVSEHLGNMGYKLTF
clone_1375_H11	clonotype2271H11	1	TRB:CTCSAVPGLGASQNTLYF;TRA:CALSDRIPGSFNKLTF
clone_1376_H11	clonotype2272H11	1	TRA:CAAANQGGSAKLIF
clone_1377_H11	clonotype2273H11	1	TRA:CAAGEGGSNYKLTF
clone_1378_H11	clonotype2274H11	1	TRA:CAARVMGYKLTF
clone_1379_H11	clonotype2275H11	1	TRA:CAASQGGNEKITF
clone_1380_H11	clonotype2277H11	1	TRA:CAAMNYNQGKLIF
clone_1381_H11	clonotype2278H11	1	TRB:CASGQGTEVFF
clone_1382_H11	clonotype2279H11	1	TRB:CASGDAWAPLF
clone_1383_H11	clonotype227H11	1	TRB:CASSLTGGGERLFF;TRA:CAAEAFSNYNVLYF;TRA:CAASDNYGNEKITF
clone_1384_H11	clonotype2280H11	1	TRB:CASGDGVEQYF
clone_1385_H11	clonotype2281H11	1	TRB:CASGDYTEVFF
clone_1386_H11	clonotype2282H11	1	TRB:CASGAKDTQYF
clone_1387_H11	clonotype2283H11	1	TRB:CASSLTAEVFF
clone_1388_H11	clonotype2284H11	1	TRB:CASSDDAEQFF;TRA:CAAELGAGNKLTF
clone_1389_H11	clonotype2285H11	1	TRB:CASSLQDTQYF;TRA:CAADTNAYKVIF
clone_1390_H11	clonotype2286H11	1	TRB:CASSPRGEQYF;TRA:CATGTNAYKVIF
clone_1391_H11	clonotype2287H11	1	TRB:CASSGGYEQYF;TRA:CAAEREAYGNEKITF
clone_1392_H11	clonotype2288H11	1	TRB:CASGRWAEQFF;TRA:CAASPNTGNYKYVF
clone_1393_H11	clonotype2289H11	1	TRB:CASSLLYEQYF;TRA:CAASHDTNAYKVIF
clone_1394_H11	clonotype2290H11	1	TRB:CASGEARGYNSPLYF;TRA:CALSLTSGGNYKPTF
clone_1395_H11	clonotype2291H11	1	TRB:CASGDTDTQYF;TRA:CVVADRGSALGRLHF
clone_1396_H11	clonotype2292H11	1	TRB:CASGEGDTQYF;TRA:CALILPGTGSNRLTF
clone_1397_H11	clonotype2293H11	1	TRB:CASGEYERLFF;TRA:CAASASSGSWQLIF
clone_1398_H11	clonotype2294H11	1	TRB:CASSLEYEQYF;TRA:CAASVETGANTGKLTF
clone_1399_H11	clonotype2295H11	1	TRA:CAAGAWQGGSAKLIF
clone_1400_H11	clonotype2296H11	1	TRA:CAMREGPRAGGSNAKLTF
clone_1401_H11	clonotype2298H11	1	TRA:CAASRAGGYKVVF
clone_1402_H11	clonotype2299H11	1	TRA:CAARKQGTGSKLSF
clone_1403_H11	clonotype2300H11	1	TRA:CAASAGNTGKLTF
clone_1404_H11	clonotype2301H11	1	TRA:CAANLTGSGGKLTL
clone_1405_H11	clonotype2302H11	1	TRA:CAASASSGSWQLIF
clone_1406_H11	clonotype2304H11	1	TRB:CASGDSGNTLYF
clone_1407_H11	clonotype2305H11	1	TRB:CASGDGQEVQYF
clone_1408_H11	clonotype2306H11	1	TRB:CASGDGGGEQYF
clone_1409_H11	clonotype2307H11	1	TRB:CASGGDNPDYTF
clone_1410_H11	clonotype2309H11	1	TRB:CASSPGQDTQYF
clone_1411_H11	clonotype2310H11	1	TRB:CASSPGQDTQYF
clone_1412_H11	clonotype2311H11	1	TRB:CASSRHNSPLYF
clone_1413_H11	clonotype2312H11	1	TRB:CASSLNNQAPLF
clone_1414_H11	clonotype2313H11	1	TRB:CASSLTGVEQYF
clone_1415_H11	clonotype2314H11	1	TRB:CASWGQGGEVFF
clone_1416_H11	clonotype2315H11	1	TRB:CASSRNQDTQYF;TRA:CAAEGSNNRIFF
clone_1417_H11	clonotype2316H11	1	TRB:CASWHRENTLYF;TRA:CAAPDSNYQLIW
clone_1418_H11	clonotype2317H11	1	TRB:CASGDVRQGGNSDYTF;TRA:CAASDYNVLYF
clone_1419_H11	clonotype2318H11	1	TRB:CASEAGVPEVFF;TRA:CAMPATGGNNKLTF
clone_1420_H11	clonotype2319H11	1	TRB:CASGDPGSEVFF;TRA:CAIDPSSGSWQLIF
clone_1421_H11	clonotype2322H11	1	TRB:CASGDVGYEQYF;TRA:CAVSLDSNYQLIW
clone_1422_H11	clonotype2323H11	1	TRB:CASGVGTPNERLFF;TRB:CASSHPNTEVFF;TRA:CAAIGQGTGSKLSF;TRA:CAVASSGSWQLIF
clone_1423_H11	clonotype2324H11	1	TRB:CARTGGQDTQYF;TRA:CAASMNSGTYQRF;TRA:CALTHDSGYNKLTF
clone_1424_H11	clonotype2325H11	1	TRB:CASGDPGNTLYF;TRA:CAPNYGNEKITF
clone_1425_H11	clonotype2326H11	1	TRB:CASGDAQYEQYF;TRA:CALDQGGRALIF
clone_1426_H11	clonotype2327H11	1	TRB:CASGDSGYEQYF;TRA:CAALNNYAQGLTF
clone_1427_H11	clonotype2328H11	1	TRB:CASGDSNERLFF;TRA:CAVSESSGSWQLIF
clone_1428_H11	clonotype2329H11	1	TRB:CASSPQGDTLYF;TRB:CASSVRDRESAEQFF;TRA:CAVSAREGGYKLTF
clone_1429_H11	clonotype2330H11	1	TRB:CASSLEGAEQFF;TRB:CASSLEGWGVNQDTQYF;TRA:CALWELRNTNTGKLTF;TRA:CAMREGPRAGGSNAKLTF
clone_1430_H11	clonotype2332H11	1	TRA:CAASASGSFNKLTF
clone_1431_H11	clonotype2333H11	1	TRA:CAASANNAGAKLTF
clone_1432_H11	clonotype2334H11	1	TRA:CAASEGGTNTGKLTF
clone_1433_H11	clonotype2335H11	1	TRA:CAASEGGTNTGKLTF
clone_1434_H11	clonotype2336H11	1	TRB:CASGGGGYAEQFF
clone_1435_H11	clonotype2337H11	1	TRB:CASGDIWDQAPLF
clone_1436_H11	clonotype2338H11	1	TRB:CASGDLTDTEVFF
clone_1437_H11	clonotype233H11	1	TRA:CASHYNVLYF
clone_1438_H11	clonotype2340H11	1	TRB:CASGDDRNSDYTF
clone_1439_H11	clonotype2341H11	1	TRB:CASSHRANERLFF
clone_1440_H11	clonotype2342H11	1	TRB:CASSSGGGDTQYF
clone_1441_H11	clonotype2343H11	1	TRB:CASSPSGGYEQYF
clone_1442_H11	clonotype2344H11	1	TRB:CASSRDNYAEQFF
clone_1443_H11	clonotype2345H11	1	TRB:CASSTGTGAGVFF
clone_1444_H11	clonotype2347H11	1	TRB:CASSLGGATEVFF
clone_1445_H11	clonotype2348H11	1	TRB:CASSLLGYAEQFF
clone_1446_H11	clonotype2349H11	1	TRB:CASGDAKDTEVFF;TRA:CAAETGGYKVVF;TRA:CAASPDYSNNRLTL
clone_1447_H11	clonotype2350H11	1	TRB:CASSLEGNSDYTF;TRA:CATENNYAQGLTF
clone_1448_H11	clonotype2351H11	1	TRB:CASGDRAQNTLYF;TRA:CAASITGTYQRF;TRA:CAIPHNMGYKLTF
clone_1449_H11	clonotype2352H11	1	TRB:CASGDVDRYEQYF;TRA:CALEHSGYNKLTF
clone_1450_H11	clonotype2354H11	1	TRB:CASSRDRGQEQYF;TRA:CAAENSAGNKLTF;TRA:CAMEQRRGSALGRLHF
clone_1451_H11	clonotype2355H11	1	TRB:CASGTGGVYEQYF;TRA:CAVKHTNAYKVIF
clone_1452_H11	clonotype2356H11	1	TRB:CASGDAGLYEQYF;TRA:CAVSHYGNEKITF
clone_1453_H11	clonotype2357H11	1	TRB:CASSLSNTGQLYF;TRA:CAASEQDNNRIFF
clone_1454_H11	clonotype2358H11	1	TRB:CASSLGGPDTQYF;TRA:CAVSAANTNKVVF
clone_1455_H11	clonotype2359H11	1	TRB:CASGAAQGREQYF;TRA:CALETGNTGKLIF
clone_1456_H11	clonotype2360H11	1	TRB:CASSLGGNTEVFF;TRA:CALHDSGYNKLTF
clone_1457_H11	clonotype2361H11	1	TRB:CASGQGTGNTLYF;TRA:CAASASGSFNKLTF;TRA:CAAVQITGNTGKLIF
clone_1458_H11	clonotype2362H11	1	TRB:CASGPGPATEVFF;TRA:CAVSIRTQVVGQLTF
clone_1459_H11	clonotype2363H11	1	TRB:CASGAGTGVEQYF;TRA:CALGYNYAQGLTF
clone_1460_H11	clonotype2364H11	1	TRB:CASGGQNYAEQFF;TRA:CALSEGNQGKLIF
clone_1461_H11	clonotype2365H11	1	TRB:CASSLGRGNTLYF;TRA:CALGEGSALGRLHF
clone_1462_H11	clonotype2366H11	1	TRB:CASSLYTQDTQYF;TRA:CALEGYSNTNKVVF
clone_1463_H11	clonotype2367H11	1	TRB:CASGEGTDTEVFF;TRA:CAAQNTEGADRLTF
clone_1464_H11	clonotype2368H11	1	TRB:CASSLDWDSPLYF;TRA:CAMTINTGANTGKLTF
clone_1465_H11	clonotype2369H11	1	TRB:CASSLERGVEQYF;TRA:CAVSVAGNTGKLIF
clone_1466_H11	clonotype236H11	1	TRB:CAWSRYEQYF;TRA:CAAPNTGNYKYVF
clone_1467_H11	clonotype2371H11	1	TRB:CASGDRDTETLYF;TRA:CALGPHDSGYNKLTF;TRA:CAMREGRGGSWQLIF
clone_1468_H11	clonotype2372H11	1	TRB:CASGAGTEDTLYF;TRA:CALSEPGSFNKLTF
clone_1469_H11	clonotype2373H11	1	TRB:CASGDGLNTEVFF;TRA:CALSDSGGSNAKLTF
clone_1470_H11	clonotype2374H11	1	TRB:CASSPWTAFEQYF;TRA:CALRLNTGANTGKLTF
clone_1471_H11	clonotype2375H11	1	TRB:CASGDHGTSEVFF;TRA:CAAVNTGNYKYVF
clone_1472_H11	clonotype2376H11	1	TRB:CASGDWGQDTQYF;TRA:CAAVPTGNYKYVF
clone_1473_H11	clonotype2377H11	1	TRB:CASGDWGGATLYF;TRA:CAASRTGNYKYVF
clone_1474_H11	clonotype2378H11	1	TRB:CASGDVGEDTQYF;TRA:CAASASSGSWQLIF
clone_1475_H11	clonotype2379H11	1	TRB:CASSPRVVYEQYF;TRA:CAATQQGTGSKLSF
clone_1476_H11	clonotype237H11	1	TRB:CAWGDERLFF;TRA:CALGITGNTGKLIF
clone_1477_H11	clonotype2380H11	1	TRB:CASGGRDNSPLYF;TRA:CAASETASLGKLQF
clone_1478_H11	clonotype2381H11	1	TRB:CASSLEPEYEQYF;TRA:CAASWGVGDNSKLIW
clone_1479_H11	clonotype2382H11	1	TRA:CALWERGSFNKLTF
clone_1480_H11	clonotype2383H11	1	TRA:CALWELAGYQNFYF
clone_1481_H11	clonotype2384H11	1	TRB:CASGRDRGRDTQYF
clone_1482_H11	clonotype2385H11	1	TRB:CASGDWGNQDTQYF
clone_1483_H11	clonotype2388H11	1	TRB:CASGREGRNSPLYF
clone_1484_H11	clonotype2389H11	1	TRB:CASGREGRNSPLYF
clone_1485_H11	clonotype238H11	1	TRB:CARKEQYF;TRB:CASSQGTPGNTLYF;TRA:CAAEASSGSWQLIF;TRA:CAVMGYNQGKLIF
clone_1486_H11	clonotype2390H11	1	TRB:CASGERGNQDTQYF
clone_1487_H11	clonotype2391H11	1	TRB:CASGDRGVQNTLYF
clone_1488_H11	clonotype2392H11	1	TRB:CASGDDRGQDTQYF
clone_1489_H11	clonotype2393H11	1	TRB:CASGAGTGGYEQYF
clone_1490_H11	clonotype2394H11	1	TRB:CASSLQGNQDTQYF
clone_1491_H11	clonotype2395H11	1	TRB:CASSPQDNQDTQYF
clone_1492_H11	clonotype2396H11	1	TRB:CASSLRVNQDTQYF
clone_1493_H11	clonotype2397H11	1	TRB:CASSSDWDSYEQYF
clone_1494_H11	clonotype2398H11	1	TRB:CASSSDWDSYEQYF
clone_1495_H11	clonotype2399H11	1	TRB:CASSSDWDSYEQYF
clone_1496_H11	clonotype239H11	1	TRB:CGADSYEQYF;TRA:CAASETASLGKLQF
clone_1497_H11	clonotype2400H11	1	TRB:CASSLDWGYAEQFF
clone_1498_H11	clonotype2401H11	1	TRB:CASSRDGDGNTLYF
clone_1499_H11	clonotype2402H11	1	TRB:CASSRGGAAETLYF
clone_1500_H11	clonotype2403H11	1	TRB:CASSLDSSGNTLYF
clone_1501_H11	clonotype2404H11	1	TRB:CASSLWGGDAEQFF
clone_1502_H11	clonotype2405H11	1	TRB:CASSPLGNYAEQFF;TRA:CIVTDITGGYKVVF
clone_1503_H11	clonotype2406H11	1	TRB:CASSQTGGAYEQYF;TRA:CAISSSGQKLVF
clone_1504_H11	clonotype2407H11	1	TRB:CASGDRLGGLEQYF;TRA:CAAEPEGADRLTF
clone_1505_H11	clonotype2409H11	1	TRB:CASGDAGEGYEQYF;TRA:CALERNAGAKLTF
clone_1506_H11	clonotype240H11	1	TRB:CAWMGHEQYF;TRA:CAARSNSAGNKLTF
clone_1507_H11	clonotype2412H11	1	TRB:CASSRGGGSETLYF;TRA:CATVASSGSWQLIF
clone_1508_H11	clonotype2413H11	1	TRB:CASSLGLGGYEQYF;TRA:CAMVGDSNYQLIW
clone_1509_H11	clonotype2414H11	1	TRB:CASSLGQGGDTQYF;TRA:CATDWDYNQGKLIF
clone_1510_H11	clonotype2415H11	1	TRB:CASSLGGSSYEQYF;TRA:CAVRDLVGYKLTF
clone_1511_H11	clonotype2416H11	1	TRB:CASGDQDRGDTQYF;TRA:CAASRNTNTGKLTF;TRA:CAVSANTGKLTF
clone_1512_H11	clonotype2417H11	1	TRB:CASGDPGGAREQYF;TRA:CILRVGNQGGSAKLIF
clone_1513_H11	clonotype2418H11	1	TRB:CASGGGTTNTEVFF;TRA:CAAEATSGSWQLIF
clone_1514_H11	clonotype2419H11	1	TRB:CASSRQGANSDYTF;TRA:CAAERGSSGNKLIF;TRA:CAALNQGGSAKLIF
clone_1515_H11	clonotype241H11	1	TRB:CAWTGDTEVFF
clone_1516_H11	clonotype2420H11	1	TRB:CASSDYRSAETLYF;TRA:CAAERRSGSWQLIF
clone_1517_H11	clonotype2421H11	1	TRB:CASSPAASGNTLYF;TRA:CAVSISNNRIFF
clone_1518_H11	clonotype2422H11	1	TRB:CASGDRGLSYEQYF;TRA:CAAANYGNEKITF
clone_1519_H11	clonotype2423H11	1	TRB:CASGEGTSQNTLYF;TRA:CAAHNTNTGKLTF
clone_1520_H11	clonotype2424H11	1	TRB:CASGGGTGENTLYF;TRA:CAVSGSMGYKLTF;TRA:CVVGADSNNRIFF
clone_1521_H11	clonotype2425H11	1	TRB:CASGDPGGAGEQYF;TRA:CAASMGQGGRALIF
clone_1522_H11	clonotype2426H11	1	TRB:CASGGGTSNSDYTF;TRA:CALFSNTNKVVF;TRA:CAVRTGNYAQGLTF
clone_1523_H11	clonotype2427H11	1	TRB:CASPPGQSAETLYF;TRA:CALSYNSNYQLIW
clone_1524_H11	clonotype2428H11	1	TRB:CASSRDNNQDTQYF;TRA:CAVSLGTGGYKVVF
clone_1525_H11	clonotype2429H11	1	TRB:CASSPPGQQDTQYF;TRA:CAVRDRRGSALGRLHF
clone_1526_H11	clonotype2430H11	1	TRB:CASSPSGGRSDYTF;TRA:CALTVSGSFNKLTF
clone_1527_H11	clonotype2431H11	1	TRB:CASSLLGGLAEQFF;TRA:CAAYNTNTGKLTF
clone_1528_H11	clonotype2432H11	1	TRB:CASGGTGGNTEVFF;TRA:CALMNYGSSGNKLIF
clone_1529_H11	clonotype2433H11	1	TRB:CASSPRGPGNTLYF;TRA:CAVSMWAGNTGKLIF
clone_1530_H11	clonotype2435H11	1	TRB:CASSPTGWGNTLYF;TRA:CAVSMNQGGRALIF
clone_1531_H11	clonotype2437H11	1	TRB:CASSLEQGNSDYTF;TRA:CAPHSGYNKLTF
clone_1532_H11	clonotype2438H11	1	TRB:CASSLDWGTYEQYF;TRA:CVLSADYSNNRLTL
clone_1533_H11	clonotype2439H11	1	TRB:CASGDLGVQNTLYF;TRA:CAVSQSSGSWQLIF
clone_1534_H11	clonotype243H11	1	TRB:CASSTGDEQYF
clone_1535_H11	clonotype2440H11	1	TRB:CASSPDSSQNTLYF;TRA:CAVSRYNTNTGKLTF
clone_1536_H11	clonotype2441H11	1	TRB:CASGDRGLGTEQFF;TRA:CALSRNNYAQGLTF
clone_1537_H11	clonotype2442H11	1	TRB:CASGDGANQDTQYF;TRA:CAVSAQNYGSSGNKLIF
clone_1538_H11	clonotype2444H11	1	TRB:CASSRDRGLDTQYF;TRA:CAASEPLTSGGNYKPTF
clone_1539_H11	clonotype2445H11	1	TRB:CASGDRANNQAPLF;TRA:CAASDNNNAPRF
clone_1540_H11	clonotype2446H11	1	TRB:CASSLGLGGYAQYF;TRA:CAASQGGRALIF
clone_1541_H11	clonotype2447H11	1	TRB:CASGDDWGGYEQYF;TRA:CAGQQGTGSKLSF
clone_1542_H11	clonotype2448H11	1	TRB:CASSRDTANTEVFF;TRA:CAAGPNYNQGKLIF
clone_1543_H11	clonotype2449H11	1	TRB:CASSLEGAGAEQFF;TRA:CAASEDNSAGNKLTF
clone_1544_H11	clonotype244H11	1	TRB:CGARQNTEVFF
clone_1545_H11	clonotype2450H11	1	TRB:CASSHDWGGWKQYF;TRA:CAASSLPGTGSNRLTF
clone_1546_H11	clonotype2451H11	1	TRB:CASGEPGLGAEQFF;TRA:CALSDPEGADRLTF
clone_1547_H11	clonotype2452H11	1	TRA:CALLYGNEKITF
clone_1548_H11	clonotype2453H11	1	TRA:CAAKGLPGTGSNRLTF
clone_1549_H11	clonotype2454H11	1	TRB:CASGDPGTGNTEVFF
clone_1550_H11	clonotype2455H11	1	TRB:CASGETGGTGNTLYF
clone_1551_H11	clonotype2456H11	1	TRB:CASGDRWGAYAEQFF
clone_1552_H11	clonotype2457H11	1	TRB:CASGDLGASAETLYF
clone_1553_H11	clonotype2458H11	1	TRB:CASGDAGWGEDTQYF
clone_1554_H11	clonotype2459H11	1	TRB:CASGDARGYNSPLYF
clone_1555_H11	clonotype245H11	1	TRB:CGARTNTEVFF
clone_1556_H11	clonotype2460H11	1	TRB:CASGDARGYNSPLYF
clone_1557_H11	clonotype2461H11	1	TRB:CASGDAGLGEDEQYF
clone_1558_H11	clonotype2462H11	1	TRB:CASGDAWGFQDTQYF
clone_1559_H11	clonotype2463H11	1	TRB:CASGDASGGQDTQYF
clone_1560_H11	clonotype2464H11	1	TRB:CASGDAWTGDYEQYF
clone_1561_H11	clonotype2465H11	1	TRB:CASGDVGGDQDTQYF
clone_1562_H11	clonotype2466H11	1	TRB:CASSPDWDNYAEQFF
clone_1563_H11	clonotype2467H11	1	TRB:CASSRTGGDNQAPLF
clone_1564_H11	clonotype2468H11	1	TRB:CASSQGASGQNTLYF
clone_1565_H11	clonotype2469H11	1	TRB:CASSLGGAGAETLYF
clone_1566_H11	clonotype246H11	1	TRB:CASSGTGGQYF;TRA:CGGAGAKLTF
clone_1567_H11	clonotype2470H11	1	TRB:CASSLGQPYTGQLYF
clone_1568_H11	clonotype2472H11	1	TRB:CASSPSDRSQDTQYF
clone_1569_H11	clonotype2473H11	1	TRB:CASSRYWGSSYEQYF
clone_1570_H11	clonotype2474H11	1	TRB:CASSLGTGRGSDYTF
clone_1571_H11	clonotype2475H11	1	TRB:CASSLEGGPGNTLYF
clone_1572_H11	clonotype2476H11	1	TRB:CASSLGGFNQDTQYF
clone_1573_H11	clonotype2477H11	1	TRB:CASSLVGNNYAEQFF
clone_1574_H11	clonotype2478H11	1	TRB:CASSLDTGSQNTLYF;TRA:CAMTYAQGLTF
clone_1575_H11	clonotype2479H11	1	TRB:CASGDPGGNYAEQFF;TRA:CALERNAGAKLTF
clone_1576_H11	clonotype2480H11	1	TRB:CASSPDWGGSYEQYF;TRA:CAVRADMGYKLTF
clone_1577_H11	clonotype2481H11	1	TRB:CASSRQGASAETLYF;TRA:CAGMNYNQGKLIF
clone_1578_H11	clonotype2482H11	1	TRB:CASSLDMGDTGQLYF;TRA:CAAEGSGSWQLIF
clone_1579_H11	clonotype2483H11	1	TRB:CASSPGNISNERLFF;TRA:CALERSTNTGKLTF
clone_1580_H11	clonotype2484H11	1	TRB:CASGEGQGANTEVFF;TRA:CAASANSGTYQRF
clone_1581_H11	clonotype2485H11	1	TRB:CASGNRGLSNERLFF;TRA:CAVSNMGYKLTF
clone_1582_H11	clonotype2486H11	1	TRB:CASGDIGGAPDTQYF;TRA:CAVSLSNYNVLYF
clone_1583_H11	clonotype2487H11	1	TRB:CASGDAGGVSYEQYF;TRA:CAASSNMGYKLTF
clone_1584_H11	clonotype2488H11	1	TRB:CASSGGQANTGQLYF;TRA:CAMGLLSGSFNKLTF
clone_1585_H11	clonotype2489H11	1	TRB:CASSPPGQGNERLFF;TRA:CAASHTNTGKLTF
clone_1586_H11	clonotype248H11	1	TRB:CGARVRGEVFF;TRA:CALSVATSSGQKLVF;TRA:CATDARTGGYKVVF
clone_1587_H11	clonotype2490H11	1	TRB:CASGDWGANTGQLYF;TRA:CAVRLSGSFNKLTF
clone_1588_H11	clonotype2491H11	1	TRB:CASGESGGSAETLYF;TRA:CAMERPMSNYNVLYF
clone_1589_H11	clonotype2492H11	1	TRB:CASGDASGGYAEQFF;TRA:CALSDYNQGKLIF
clone_1590_H11	clonotype2493H11	1	TRB:CASSLDQGAGYTLYF;TRA:CVLSANTGNYKYVF
clone_1591_H11	clonotype2494H11	1	TRB:CASSPTGRGQDTQYF;TRA:CALLPSSFSKLVF
clone_1592_H11	clonotype2495H11	1	TRB:CASGERLGGRAEQFF;TRA:CALIRSGSWQLIF
clone_1593_H11	clonotype2496H11	1	TRB:CASGDADGYNSPLYF;TRA:CALSAPSNYQLIW
clone_1594_H11	clonotype2497H11	1	TRB:CASGAGTGSSYEQYF;TRA:CAVSASNSGTYQRF
clone_1595_H11	clonotype2499H11	1	TRB:CASGEGSVSQNTLYF;TRA:CVVGDRGSALGRLHF
clone_1596_H11	clonotype249H11	1	TRB:CASGGAEVFF;TRA:CALPPSNTNKVVF;TRA:CASLPSSSFSKLVF
clone_1597_H11	clonotype2500H11	1	TRB:CASGDDGGDQDTQYF;TRA:CAMREGYYANKMIF
clone_1598_H11	clonotype2501H11	1	TRB:CASGDAGGDSYEQYF;TRA:CVVGDRGSALGRLHF
clone_1599_H11	clonotype2502H11	1	TRB:CASGDAGQTNSDYTF;TRA:CAMEATASLGKLQF
clone_1600_H11	clonotype2503H11	1	TRB:CASGDGDISQNTLYF;TRA:CAMRESNMGYKLTF
clone_1601_H11	clonotype2504H11	1	TRB:CASGGPTDSGNTLYF;TRA:CALGGAAGNTGKLIF
clone_1602_H11	clonotype2505H11	1	TRB:CASSPGQGGTGQLYF;TRA:CAMEGQGGSAKLIF
clone_1603_H11	clonotype2506H11	1	TRB:CASSLRTTNYAEQFF;TRA:CALGDYSNNRLTL
clone_1604_H11	clonotype2507H11	1	TRB:CASSLGTNANSDYTF;TRA:CALSPRGGSALGRLHF
clone_1605_H11	clonotype2508H11	1	TRB:CASGELGGADAEQFF;TRA:CALGDRTGGLSGKLTF
clone_1606_H11	clonotype2509H11	1	TRB:CASSPGTTNNQAPLF;TRA:CAATGNTGKLIF
clone_1607_H11	clonotype250H11	1	TRB:CASSDKNTLYF;TRA:CALDRNNAGAKLTF
clone_1608_H11	clonotype2510H11	1	TRB:CASGEIRGYNSPLYF;TRA:CAAGPNQGGSAKLIF
clone_1609_H11	clonotype2511H11	1	TRB:CASGDAGGNYAEQFF;TRA:CAASEYSNNRLTL
clone_1610_H11	clonotype2512H11	1	TRB:CASGQTGGATGQLYF;TRA:CAASAGYNQGKLIF
clone_1611_H11	clonotype2513H11	1	TRB:CASGDTGGRAETLYF;TRA:CAASVNTGNYKYVF
clone_1612_H11	clonotype2514H11	1	TRB:CASGDGTGGSYEQYF;TRA:CAASAGGGSAKLIF
clone_1613_H11	clonotype2515H11	1	TRB:CASSPETNNQDTQYF;TRA:CAASESGGSNYKLTF
clone_1614_H11	clonotype2516H11	1	TRB:CASSLGQGSQNTLYF;TRA:CAASAPTGYQNFYF
clone_1615_H11	clonotype2517H11	1	TRB:CASGDAGGSQNTLYF;TRA:CAASDGTQVVGQLTF
clone_1616_H11	clonotype2518H11	1	TRB:CASSLDVNYNSPLYF;TRA:CALSARNAKLTF
clone_1617_H11	clonotype2519H11	1	TRA:CALTPNNNNAPRF
clone_1618_H11	clonotype251H11	1	TRB:CGARGDAEQFF;TRA:CAAGASSGSWQLIF
clone_1619_H11	clonotype2520H11	1	TRA:CALTPNNNNAPRF
clone_1620_H11	clonotype2521H11	1	TRA:CALTPNNNNAPRF
clone_1621_H11	clonotype2522H11	1	TRB:CASGDASGGSSYEQYF
clone_1622_H11	clonotype2523H11	1	TRB:CASGDAAGGRQDTQYF
clone_1623_H11	clonotype2526H11	1	TRB:CASGDSWGGAQNTLYF
clone_1624_H11	clonotype2527H11	1	TRB:CASGDAGGANQDTQYF;TRA:CAAEAYSSGQKLVF
clone_1625_H11	clonotype2528H11	1	TRB:CASGPGQKISNERLFF;TRA:CAVSISAGNKLTF
clone_1626_H11	clonotype2529H11	1	TRB:CASGDETGGSNSDYTF;TRA:CAALLTSGGNYKPTF
clone_1627_H11	clonotype252H11	1	TRB:CASSVQTEVFF;TRA:CATEGTGGYKVVF
clone_1628_H11	clonotype2530H11	1	TRB:CASSLGTGGFSYEQYF;TRA:CAVWTGGYKVVF
clone_1629_H11	clonotype2531H11	1	TRB:CASGDPGQGRKDTLYF;TRA:CAASPNTGYQNFYF
clone_1630_H11	clonotype2533H11	1	TRB:CASSRDRGISNERLFF;TRA:CATDWDYSNNRLTL
clone_1631_H11	clonotype2534H11	1	TRB:CASGDRLGLNQDTQYF;TRA:CALSLYAQGLTF
clone_1632_H11	clonotype2535H11	1	TRB:CASSLDHPGGGNTLYF;TRA:CALSMIAGGYKVVF
clone_1633_H11	clonotype2536H11	1	TRB:CASGDGRDRGGGEQYF;TRA:CVVGDRGSALGRLHF
clone_1634_H11	clonotype2538H11	1	TRB:CASGDAFGTGVGEQYF;TRA:CALGDLTTGGNNKLTF
clone_1635_H11	clonotype2539H11	1	TRB:CASGDATGGAQDTQYF;TRA:CAASASSGSWQLIF
clone_1636_H11	clonotype253H11	1	TRB:CASSYEQYF;TRB:CTCSAGDRGAEQFF;TRA:CALGGSWQLIF
clone_1637_H11	clonotype2540H11	1	TRB:CASSTGTDSYNSPLYF;TRA:CAASETNSAGNKLTF
clone_1638_H11	clonotype2541H11	1	TRA:CALSDDTGYQNFYF
clone_1639_H11	clonotype2542H11	1	TRB:CASSSGTGGATTGQLYF
clone_1640_H11	clonotype2543H11	1	TRB:CASGDALGLASSYEQYF;TRA:CALSSATSSGQKLVF
clone_1641_H11	clonotype2544H11	1	TRB:CASSLEAGTGNYAEQFF;TRA:CAASMPGGYKVVF
clone_1642_H11	clonotype2545H11	1	TRB:CASSPGLGGIDSYEQYF;TRA:CALSDFYNQGKLIF
clone_1643_H11	clonotype2546H11	1	TRB:CASSLPHLGGAAETLYF;TRA:CAMRENTGNYKYVF
clone_1644_H11	clonotype2547H11	1	TRB:CASSLGGLVSSAETLYF;TRA:CAASEPSGSWQLIF
clone_1645_H11	clonotype2548H11	1	TRB:CASGEISRDRDSGNTLYF
clone_1646_H11	clonotype2549H11	1	TRB:CASGAPLGTKISNERLFF;TRA:CVVGDRGSALGRLHF
clone_1647_H11	clonotype254H11	1	TRB:CAWSGGGEQYF;TRA:CAASYGSSGNKLIF
clone_1648_H11	clonotype255H11	1	TRB:CASSGRYEQYF;TRA:CAASDSNNRIFF
clone_1649_H11	clonotype256H11	1	TRB:CASKQGTEVFF;TRB:CASSPGTENTLYF;TRA:CAASNTGYQNFYF
clone_1650_H11	clonotype257H11	1	TRB:CASSETGGSQNTLYF;TRB:CAWSPGDEQYF;TRA:CALGGRESNNRIFF
clone_1651_H11	clonotype258H11	1	TRB:CASSDGTGGSF;TRA:CVVGDRGSALGRLHF
clone_1652_H11	clonotype259H11	1	TRB:CASSDTAEVFF;TRA:CAASRNSNNRIFF
clone_1653_H11	clonotype260H11	1	TRB:CGARTHTEVFF;TRA:CAARQQGTGSKLSF
clone_1654_H11	clonotype261H11	1	TRB:CAWSLGDTQYF;TRA:CAAGAMATGGNNKLTF
clone_1655_H11	clonotype263H11	1	TRA:CAIDPNTNKVVF
clone_1656_H11	clonotype264H11	1	TRB:CASSLSEQYF
clone_1657_H11	clonotype265H11	1	TRA:CATGGTNAYKVIF
clone_1658_H11	clonotype266H11	1	TRA:CAGDTNAYKVIF
clone_1659_H11	clonotype267H11	1	TRB:CAWSQGPQAPLF
clone_1660_H11	clonotype269H11	1	TRA:CAVSSNTNKVVF
clone_1661_H11	clonotype270H11	1	TRB:CASSLDKPL
clone_1662_H11	clonotype271H11	1	TRA:CILRLQGGSAKLIF
clone_1663_H11	clonotype272H11	1	TRA:CILRANTGYQNFYF
clone_1664_H11	clonotype273H11	1	TRA:CILRVRGGSAKLIF
clone_1665_H11	clonotype274H11	1	TRA:CILRVSNNNNAPRF
clone_1666_H11	clonotype275H11	1	TRB:CASSDIYEQYF
clone_1667_H11	clonotype276H11	1	TRB:CASSGGGEQYF
clone_1668_H11	clonotype277H11	1	TRB:CASRDSAETLYF
clone_1669_H11	clonotype278H11	1	TRB:CASRDSAETLYF
clone_1670_H11	clonotype279H11	1	TRB:CASRDSAETLYF
clone_1671_H11	clonotype280H11	1	TRB:CASRGQSYEQYF
clone_1672_H11	clonotype281H11	1	TRB:CASSDLGGILYF
clone_1673_H11	clonotype282H11	1	TRB:CASSDPTYEQYF
clone_1674_H11	clonotype283H11	1	TRB:CASSGLTAEQYF
clone_1675_H11	clonotype284H11	1	TRB:CASSVNTGQLYF
clone_1676_H11	clonotype285H11	1	TRB:CASSQNTLYF
clone_1677_H11	clonotype286H11	1	TRB:CSSRTVYAEQFF
clone_1678_H11	clonotype287H11	1	TRB:CGATGQYAEQFF
clone_1679_H11	clonotype288H11	1	TRB:CGANRDRNTLYF
clone_1680_H11	clonotype289H11	1	TRB:CGATSGGTEVFF
clone_1681_H11	clonotype290H11	1	TRB:CGARYSGNTLYF
clone_1682_H11	clonotype293H11	1	TRB:CGARGTGTEVFF
clone_1683_H11	clonotype294H11	1	TRB:CGASGQNQAPLF
clone_1684_H11	clonotype295H11	1	TRB:CASTRGTGQLYF;TRA:CAPYGNEKITF
clone_1685_H11	clonotype296H11	1	TRB:CGARDRQDTQYF;TRA:CAASETNSAGNKLTF;TRA:CVFPQGGRALIF
clone_1686_H11	clonotype297H11	1	TRB:CGAGTSQNTLYF;TRA:CAVYQGGRALIF
clone_1687_H11	clonotype298H11	1	TRB:CAWSPVNSDYTF;TRA:CAAETSSGQKLVF;TRA:CALSNMGYKLTF
clone_1688_H11	clonotype299H11	1	TRB:CASSDRGYTLYF;TRB:CASSLEREGYNSPLYF;TRA:CAAEAGNNNAPRF
clone_1689_H11	clonotype300H11	1	TRB:CSSTGNQDTQYF;TRA:CAAEAHMGYKLTF
clone_1690_H11	clonotype301H11	1	TRB:CGANRDRHTQYF;TRA:CAMTNSAGNKLTF
clone_1691_H11	clonotype303H11	1	TRB:CASSEGTEVFF;TRA:CAIDQNSAGNKLTF
clone_1692_H11	clonotype304H11	1	TRB:CASSEPGQQYF;TRA:CAARNSGGSNYKLTF
clone_1693_H11	clonotype306H11	1	TRB:CASSGLDTQYF;TRA:CATDATGNYKYVF
clone_1694_H11	clonotype307H11	1	TRB:CASSEGFSDYTF;TRA:CAARRNSNNRIFF
clone_1695_H11	clonotype308H11	1	TRB:CASSDASNTQYF;TRA:CAASENSNYQLIW
clone_1696_H11	clonotype309H11	1	TRB:CGARSYNSPLYF;TRA:CALSRNSNNRIFF
clone_1697_H11	clonotype310H11	1	TRB:CASSLRRNTGQLYF;TRB:CAWRWGPYEQYF;TRA:CALEGGGSAKLIF;TRA:CAVSSDRGSALGRLHF
clone_1698_H11	clonotype311H11	1	TRB:CAWSLDKYEQYF;TRA:CAASRSTNTGKLTF
clone_1699_H11	clonotype312H11	1	TRB:CASSDPSYEQYF;TRA:CAVGTGANTGKLTF
clone_1700_H11	clonotype313H11	1	TRB:CASSLGGDTQYF;TRB:CGARLGGWEQYF;TRA:CAASMGGNTGKLIF
clone_1701_H11	clonotype315H11	1	TRB:CASTPTGDEQYF;TRA:CAARSSGSWQLIF
clone_1702_H11	clonotype316H11	1	TRB:CASSDGNQAPLF;TRA:CAARLPGTGSNRLTF
clone_1703_H11	clonotype317H11	1	TRB:CGARRGNTEVFF;TRA:CAASERVGDNSKLIW
clone_1704_H11	clonotype318H11	1	TRB:CGARGGGNTLYF;TRA:CAASDSNNRIFF;TRA:CAVSISGGSNAKLTF
clone_1705_H11	clonotype319H11	1	TRB:CGARVQENTLYF;TRA:CAVSSYQGGRALIF
clone_1706_H11	clonotype320H11	1	TRB:CAWSLADSDYTF;TRA:CAASIDTGYQNFYF
clone_1707_H11	clonotype321H11	1	TRB:CASRDSAETLYF;TRA:CAVENQGGSAKLIF
clone_1708_H11	clonotype322H11	1	TRB:CASSQDNSPLYF;TRA:CAASGTQVVGQLTF
clone_1709_H11	clonotype323H11	1	TRB:CASGEPYEQYF;TRA:CALGAMNYNQGKLIF
clone_1710_H11	clonotype324H11	1	TRB:CAWSRQNSDYTF;TRA:CALGDQNSGTYQRF
clone_1711_H11	clonotype325H11	1	TRB:CGARTGKTDYTF;TRA:CALGDRGSNNRIFF
clone_1712_H11	clonotype326H11	1	TRB:CGARDNQDTQYF;TRA:CALGGMQQGTGSKLSF
clone_1713_H11	clonotype327H11	1	TRB:CGAGQNTGQLYF;TRA:CAARLNYGSSGNKLIF;TRA:CVVGDGLPGTGSNRLTF
clone_1714_H11	clonotype328H11	1	TRB:CAWIELGGRMYF;TRA:CAASPNTNKVVF
clone_1715_H11	clonotype329H11	1	TRB:CASGPRDEQYF;TRA:CAPNNAGAKLTF
clone_1716_H11	clonotype330H11	1	TRB:CASSGQYEQYF;TRA:CAASDYSNNRLTL
clone_1717_H11	clonotype331H11	1	TRB:CASSAAGSDYTF;TRA:CAAGVTGSGGKLTL
clone_1718_H11	clonotype332H11	1	TRB:CGARGSAETLYF;TRA:CAANYQGGRALIF
clone_1719_H11	clonotype333H11	1	TRB:CASKQGGAEQFF;TRA:CAASGPGGNYKPTF
clone_1720_H11	clonotype334H11	1	TRB:CGARDWVYEQYF;TRA:CAARGTGANTGKLTF
clone_1721_H11	clonotype335H11	1	TRB:CAWSHRGYEQYF;TRA:CAASDPGTGSNRLTF
clone_1722_H11	clonotype336H11	1	TRB:CASGWGTEVFF;TRA:CALRITGSGGKLTL
clone_1723_H11	clonotype337H11	1	TRA:CAVDNNNAPRF
clone_1724_H11	clonotype338H11	1	TRA:CAIDRHNTGKLTF
clone_1725_H11	clonotype340H11	1	TRA:CAFLSGSFNKLTF
clone_1726_H11	clonotype341H11	1	TRB:CASSFRTEVFF
clone_1727_H11	clonotype342H11	1	TRB:CASRDRGPEVFF
clone_1728_H11	clonotype343H11	1	TRB:CASRDRGPEVFF
clone_1729_H11	clonotype344H11	1	TRB:CASSQEHSDYTF
clone_1730_H11	clonotype345H11	1	TRB:CASSQVGAEVFF
clone_1731_H11	clonotype346H11	1	TRB:CASSHQNTEVFF
clone_1732_H11	clonotype347H11	1	TRB:CASSHLGSEQYF
clone_1733_H11	clonotype348H11	1	TRA:CATDYDTNAYKVIF
clone_1734_H11	clonotype349H11	1	TRA:CAAEADSNYQLIW
clone_1735_H11	clonotype350H11	1	TRA:CAAEAGSGGKLTL
clone_1736_H11	clonotype351H11	1	TRA:CAVRNNAGAKLTF
clone_1737_H11	clonotype352H11	1	TRA:CAVRNNAGAKLTF
clone_1738_H11	clonotype355H11	1	TRB:CAQSGTNNSPLYF
clone_1739_H11	clonotype356H11	1	TRB:CAWKPVPNERLFF
clone_1740_H11	clonotype357H11	1	TRB:CAWTNSYNSPLYF
clone_1741_H11	clonotype358H11	1	TRB:CAWRTKPNTEVFF
clone_1742_H11	clonotype359H11	1	TRB:CAWRDRGGERLFF
clone_1743_H11	clonotype361H11	1	TRB:CAWSLDRNSPLYF
clone_1744_H11	clonotype362H11	1	TRB:CAWSLPGQDTQYF
clone_1745_H11	clonotype364H11	1	TRB:CAWSLGGRGEQYF
clone_1746_H11	clonotype365H11	1	TRB:CASSKDYEQYF
clone_1747_H11	clonotype366H11	1	TRB:CASSKDYEQYF
clone_1748_H11	clonotype367H11	1	TRB:CASSPSQNTLYF
clone_1749_H11	clonotype368H11	1	TRB:CASSDYSYEQYF
clone_1750_H11	clonotype369H11	1	TRB:CASSGSQDTQYF
clone_1751_H11	clonotype370H11	1	TRB:CASGDREAEVFF
clone_1752_H11	clonotype371H11	1	TRB:CASGQGGDEQYF
clone_1753_H11	clonotype373H11	1	TRB:CASSDNRGAEQFF
clone_1754_H11	clonotype374H11	1	TRB:CASSVGAYAEQFF
clone_1755_H11	clonotype375H11	1	TRB:CASSVGGQDTQYF
clone_1756_H11	clonotype376H11	1	TRB:CASSQNTEVFF
clone_1757_H11	clonotype377H11	1	TRB:CASSPRDTQYF
clone_1758_H11	clonotype378H11	1	TRB:CASWGLAALYF
clone_1759_H11	clonotype379H11	1	TRB:CSSRAGGQDTQYF
clone_1760_H11	clonotype380H11	1	TRB:CSSRAGGQDTQYF
clone_1761_H11	clonotype381H11	1	TRB:CSSRGQDAERLFF
clone_1762_H11	clonotype382H11	1	TRB:CGAYWASAETLYF
clone_1763_H11	clonotype383H11	1	TRB:CGARQGTNERLFF
clone_1764_H11	clonotype384H11	1	TRB:CGARTVSNERLFF
clone_1765_H11	clonotype385H11	1	TRB:CGARRTVQDTQYF
clone_1766_H11	clonotype386H11	1	TRB:CGAREGWGNTLYF
clone_1767_H11	clonotype387H11	1	TRB:CGASPGRGNTLYF
clone_1768_H11	clonotype388H11	1	TRB:CGALTGPNTEVFF
clone_1769_H11	clonotype389H11	1	TRB:CASSGREQDTQYF;TRB:CASSTTGGSYEQYF;TRA:CATRNMGYKLTF
clone_1770_H11	clonotype390H11	1	TRB:CAWRQFSNERLFF;TRB:CTCSAVNWGGRDF;TRA:CAVGGSNAKLTF
clone_1771_H11	clonotype391H11	1	TRB:CAAGTGNSDYTF;TRA:CALSDRWNNNNAPRF;TRA:CILRVSGGNEKITF
clone_1772_H11	clonotype392H11	1	TRB:CASSDSSAETLYF;TRA:CAVSYNRIFF
clone_1773_H11	clonotype393H11	1	TRB:CASSDAVGGGLYF;TRB:CASSQINERLFF;TRA:CAAGARQQGTGSKLSF;TRA:CAALNNNNAPRF
clone_1774_H11	clonotype394H11	1	TRB:CASGGQDTQYF;TRA:CAAEDQGGRALIF
clone_1775_H11	clonotype396H11	1	TRB:CASSQAGYEQYF;TRA:CAPRGYNQGKLIF
clone_1776_H11	clonotype397H11	1	TRB:CASSAGGAYEQYF;TRA:CILRVNQGTGSKLSF
clone_1777_H11	clonotype398H11	1	TRB:CASSGTGADTQYF;TRA:CAMEDTNAYKVIF
clone_1778_H11	clonotype399H11	1	TRB:CASSFTGSAEQFF;TRB:CASSIQDTQYF;TRA:CAASPSNTNKVVF;TRA:CAPITGNTGKLIF
clone_1779_H11	clonotype400H11	1	TRB:CGAKTGSQNTLYF;TRA:CAMGTGSGGKLTL
clone_1780_H11	clonotype401H11	1	TRB:CACSPWSSYEQYF;TRA:CAIDQGTGGYKVVF
clone_1781_H11	clonotype402H11	1	TRB:CASSGQGAEQFF;TRA:CAAYYNVLYF
clone_1782_H11	clonotype403H11	1	TRB:CASSVGQNTLYF;TRA:CAMKSNYNVLYF
clone_1783_H11	clonotype404H11	1	TRB:CASTGGYNSPLYF;TRA:CASDTGNYKYVF
clone_1784_H11	clonotype405H11	1	TRB:CASSFQDTQYF;TRA:CAARKGADRLTF
clone_1785_H11	clonotype406H11	1	TRB:CGASSGYNSPLYF;TRA:CALERVYGNEKITF
clone_1786_H11	clonotype407H11	1	TRB:CASSVGGNYAEQFF;TRB:CGARDRDGERLFF;TRA:CALERSGNTGKLIF
clone_1787_H11	clonotype408H11	1	TRB:CAWNPGQGALVFF;TRA:CALSDKYANKMIF
clone_1788_H11	clonotype409H11	1	TRB:CASSDDGDEQYF;TRA:CATDRSGSWQLIF
clone_1789_H11	clonotype410H11	1	TRB:CASRDSGNTLYF;TRA:CAVKNTNTGKLTF
clone_1790_H11	clonotype411H11	1	TRB:CASSDGPNSDYTF;TRA:CAARRNAGAKLTF;TRA:CAMRVNYNQGKLIF
clone_1791_H11	clonotype412H11	1	TRB:CASSAGDYAEQFF;TRA:CAVMDTNTGKLTF
clone_1792_H11	clonotype413H11	1	TRB:CSSRGGPNTEVFF;TRA:CAVSMRGADRLTF
clone_1793_H11	clonotype414H11	1	TRB:CGARRDRVETLYF;TRA:CALSGYNQGKLIF
clone_1794_H11	clonotype415H11	1	TRB:CGAITGGLSEQYF;TRA:CATDDTNAYKVIF
clone_1795_H11	clonotype416H11	1	TRB:CGGGGDGQLYF;TRA:CAVSMPGSGGKLTL
clone_1796_H11	clonotype417H11	1	TRB:CAWSHGRGTEVFF;TRA:CAAEFNTGANTGKLTF
clone_1797_H11	clonotype418H11	1	TRB:CAWSLPGGYEQYF;TRA:CALSDGSSGNKLIF
clone_1798_H11	clonotype419H11	1	TRB:CAWSLPEGYEQYF;TRA:CAASSMSNYNVLYF
clone_1799_H11	clonotype420H11	1	TRB:CAWSLGADTEVFF;TRA:CAASDMSNYNVLYF;TRA:CATQAYQGGRALIF
clone_1800_H11	clonotype421H11	1	TRB:CASSEQVAEQFF;TRA:CATDRGSALGRLHF
clone_1801_H11	clonotype422H11	1	TRB:CASKKGGDERLFF;TRA:CAARTNTGNYKYVF
clone_1802_H11	clonotype423H11	1	TRB:CASRQGRQDTQYF;TRA:CVPHANSGTYQRF
clone_1803_H11	clonotype424H11	1	TRB:CASSQNTEVFF;TRB:CAWSWGGSSYEQYF;TRA:CAVSAGNYKYVF
clone_1804_H11	clonotype425H11	1	TRB:CSSREGIAETLYF;TRA:CAASVNYSNNRLTL
clone_1805_H11	clonotype426H11	1	TRB:CGARGSANTEVFF;TRA:CAVNYNQGKLIF
clone_1806_H11	clonotype428H11	1	TRB:CAWSPPNQDTQYF;TRA:CALGRASSGSWQLIF
clone_1807_H11	clonotype429H11	1	TRB:CAWSLGQNTEVFF;TRA:CAAFYSNNRLTL;TRA:CAASTSSGQKLVF
clone_1808_H11	clonotype430H11	1	TRB:CAWGRDSNERLFF;TRA:CAVSPYNTNTGKLTF
clone_1809_H11	clonotype431H11	1	TRB:CASSEGSYEQYF;TRB:CGARDLDRDGNSPLYF;TRA:CAQGYNQGKLIF
clone_1810_H11	clonotype432H11	1	TRB:CASSDTGSPLYF;TRA:CAVSMNYNQGKLIF
clone_1811_H11	clonotype433H11	1	TRB:CASGGSGNTLYF;TRA:CVLGPDTNAYKVIF
clone_1812_H11	clonotype434H11	1	TRB:CGARGGVSYEQYF;TRA:CAASLGAGAKLTF
clone_1813_H11	clonotype435H11	1	TRB:CGARDWSSYEQYF;TRA:CAVRSSNTNKVVF
clone_1814_H11	clonotype436H11	1	TRB:CGASQGANTEVFF;TRA:CALGDPNTNKVVF
clone_1815_H11	clonotype437H11	1	TRB:CGASPGDQDTQYF;TRA:CALGNTGYQNFYF
clone_1816_H11	clonotype438H11	1	TRB:CGAGTGYAETLYF;TRA:CAMERSNSAGNKLTF;TRA:CAMREGPTSSGQKLVF
clone_1817_H11	clonotype439H11	1	TRB:CGVLTGVYAEQFF;TRA:CALGRTGGYKVVF
clone_1818_H11	clonotype440H11	1	TRB:CASRDAYEQYF;TRA:CAASVGNYAQGLTF
clone_1819_H11	clonotype441H11	1	TRB:CASSRTGYEQYF;TRA:CALSDRNSNNRIFF
clone_1820_H11	clonotype442H11	1	TRB:CARGTGRDSDYTF;TRB:CASTDGTEVFF;TRA:CALSASAGNKLTF
clone_1821_H11	clonotype443H11	1	TRB:CASSMTDYEQYF;TRA:CAASANTGNYKYVF
clone_1822_H11	clonotype444H11	1	TRB:CASSERQYEQYF;TRA:CAASSTGGNNKLTF
clone_1823_H11	clonotype445H11	1	TRB:CASRGWEQYF;TRB:CASSDTGQAPLF;TRA:CAVSENTNAYKVIF
clone_1824_H11	clonotype446H11	1	TRB:CASGDKSSDYTF;TRA:CAVSDDTGANTGKLTF
clone_1825_H11	clonotype447H11	1	TRB:CASSEAGCQAPLF;TRA:CAASRGGGNNKLTF
clone_1826_H11	clonotype449H11	1	TRB:CGARRGSSYEQYF;TRA:CALSAEGGRALIF
clone_1827_H11	clonotype450H11	1	TRB:CGARDVTQDTQYF;TRA:CALRGQGGRALIF
clone_1828_H11	clonotype452H11	1	TRB:CASSSTETLYF;TRA:CALSRYGSSGNKLIF
clone_1829_H11	clonotype453H11	1	TRB:CASGAHRANTEVFF;TRB:CASSRVYEQYF;TRA:CALSAANYNQGKLIF;TRA:CAMREGFGSAGNKLTF
clone_1830_H11	clonotype454H11	1	TRB:CASKPIQDTQYF;TRA:CALSDLAGSFNKLTF
clone_1831_H11	clonotype455H11	1	TRB:CASSENNSGNTLYF;TRB:CGARLGSQNTLYF;TRA:CALTRNNNNAPRF
clone_1832_H11	clonotype456H11	1	TRB:CGARDRDYAEQFF;TRA:CAMREDYGNEKITF
clone_1833_H11	clonotype457H11	1	TRB:CASSDPGYEQYF;TRA:CAMRGMSNYNVLYF
clone_1834_H11	clonotype458H11	1	TRB:CASGTGDHERLFF;TRA:CAASALTNSAGNKLTF
clone_1835_H11	clonotype459H11	1	TRB:CGAPGTGNTEVFF;TRA:CAMGGAYTGYQNFYF
clone_1836_H11	clonotype460H11	1	TRB:CASGEGGKDTQYF;TRB:CAWGDRVDTEVFF;TRA:CALSSRNSGGSNAKLTF
clone_1837_H11	clonotype461H11	1	TRB:CASSEGNSDYTF;TRA:CAAANNNNAPRF
clone_1838_H11	clonotype462H11	1	TRB:CASRRTGGREQYF;TRA:CAATSNNRIFF
clone_1839_H11	clonotype463H11	1	TRB:CASSEVAETLYF;TRA:CAATASLGKLQF
clone_1840_H11	clonotype464H11	1	TRB:CAWMGGGAETLYF;TRA:CAARGAGSGGKLTL
clone_1841_H11	clonotype465H11	1	TRB:CASKGRGNTLYF;TRA:CAAHNTNTGKLTF
clone_1842_H11	clonotype466H11	1	TRB:CASSSGGTETLYF;TRA:CAASAPSGSWQLIF
clone_1843_H11	clonotype468H11	1	TRB:CAQGAAETLYF;TRA:CAARLPGTGSNRLTF
clone_1844_H11	clonotype469H11	1	TRB:CASSPGGGERLFF;TRA:CAASPTGFASALTF
clone_1845_H11	clonotype470H11	1	TRB:CASSQEGEQYF;TRA:CAASASSGSWQLIF
clone_1846_H11	clonotype471H11	1	TRB:CSAGTGRNTEVFF;TRA:CAASGMSNYNVLYF
clone_1847_H11	clonotype473H11	1	TRB:CARPGQGHSDYTF;TRB:CAWSSGAGNTLYF;TRA:CAASGIGNNYAQGLTF
clone_1848_H11	clonotype474H11	1	TRB:CAWSQTGQDTQYF;TRA:CALSEQGTGSKLSF
clone_1849_H11	clonotype475H11	1	TRB:CASSLRSQNTLYF;TRA:CALILNTGYQNFYF
clone_1850_H11	clonotype476H11	1	TRB:CASSSGWDTQYF;TRA:CALRGTPGTGSNRLTF
clone_1851_H11	clonotype477H11	1	TRA:CAVKDSNYQLIW
clone_1852_H11	clonotype478H11	1	TRA:CAVKDSNYQLIW
clone_1853_H11	clonotype479H11	1	TRA:CAATSNTNKVVF
clone_1854_H11	clonotype480H11	1	TRA:CAASKGGRALIF
clone_1855_H11	clonotype481H11	1	TRA:CALERRSNTNKVVF
clone_1856_H11	clonotype482H11	1	TRA:CAMDSNTGYQNFYF
clone_1857_H11	clonotype484H11	1	TRB:CASSPGQTEVFF
clone_1858_H11	clonotype487H11	1	TRB:CASSQANTEVFF
clone_1859_H11	clonotype488H11	1	TRB:CASSARAAEQFF
clone_1860_H11	clonotype489H11	1	TRB:CASSLTGDEQYF
clone_1861_H11	clonotype490H11	1	TRB:CASSQDRAERLFF
clone_1862_H11	clonotype491H11	1	TRB:CASSQEGFYEQYF
clone_1863_H11	clonotype492H11	1	TRB:CASSQAGTHEQYF
clone_1864_H11	clonotype493H11	1	TRB:CASSQAGGYEQYF
clone_1865_H11	clonotype494H11	1	TRB:CASSQAGGYEQYF
clone_1866_H11	clonotype495H11	1	TRB:CASSHRGEDTQYF
clone_1867_H11	clonotype496H11	1	TRB:CASSPRDLDTQYF
clone_1868_H11	clonotype499H11	1	TRB:CASSRQGRDEQYF
clone_1869_H11	clonotype501H11	1	TRB:CASRDWGENEQYF
clone_1870_H11	clonotype502H11	1	TRA:CAAEANNYAQGLTF
clone_1871_H11	clonotype504H11	1	TRA:CAAEAFSNYNVLYF
clone_1872_H11	clonotype507H11	1	TRA:CAAERGSSGNKLIF
clone_1873_H11	clonotype508H11	1	TRA:CAAERGSSGNKLIF
clone_1874_H11	clonotype509H11	1	TRA:CAAERGSSGNKLIF
clone_1875_H11	clonotype510H11	1	TRA:CAAERGSSGNKLIF
clone_1876_H11	clonotype511H11	1	TRA:CAAEAATGYQNFYF
clone_1877_H11	clonotype512H11	1	TRA:CALNNYAQGLTF
clone_1878_H11	clonotype513H11	1	TRA:CAGTGNTGKLIF
clone_1879_H11	clonotype514H11	1	TRA:CAGTGNTGKLIF
clone_1880_H11	clonotype516H11	1	TRA:CAVRDGTNTGKLTF
clone_1881_H11	clonotype519H11	1	TRA:CAVRDGTNTGKLTF
clone_1882_H11	clonotype520H11	1	TRB:CAWSHRGSQNTLYF
clone_1883_H11	clonotype521H11	1	TRB:CAGPGQGTNERLFF
clone_1884_H11	clonotype522H11	1	TRB:CAWSPAGRYAEQFF
clone_1885_H11	clonotype523H11	1	TRB:CAWSRDRANSDYTF
clone_1886_H11	clonotype524H11	1	TRB:CAWSRGQGNTEVFF
clone_1887_H11	clonotype526H11	1	TRB:CAWSLTGTGNTLYF
clone_1888_H11	clonotype527H11	1	TRB:CAWSLGASQNTLYF
clone_1889_H11	clonotype528H11	1	TRB:CAWSPQVSNERLFF
clone_1890_H11	clonotype530H11	1	TRB:CAWSPGTGGYEQYF
clone_1891_H11	clonotype531H11	1	TRB:CAWSPWGIDSDYTF
clone_1892_H11	clonotype532H11	1	TRB:CAWSLQGSNTEVFF
clone_1893_H11	clonotype533H11	1	TRB:CAWSLDRNYAEQFF
clone_1894_H11	clonotype534H11	1	TRB:CAWSLGEGYAEQFF
clone_1895_H11	clonotype535H11	1	TRB:CAWSLVSTNSDYTF
clone_1896_H11	clonotype536H11	1	TRB:CAWSLVVANERLFF
clone_1897_H11	clonotype537H11	1	TRB:CAWSLGTNNSPLYF
clone_1898_H11	clonotype538H11	1	TRB:CAWSLSWGEAEQFF
clone_1899_H11	clonotype539H11	1	TRB:CAWSLGGRDAEQFF
clone_1900_H11	clonotype540H11	1	TRB:CAWSLGTGDTEVFF
clone_1901_H11	clonotype541H11	1	TRB:CAWSGLGGSYEQYF
clone_1902_H11	clonotype542H11	1	TRB:CASRQGFTQYF
clone_1903_H11	clonotype543H11	1	TRB:CASSSEDTQYF
clone_1904_H11	clonotype544H11	1	TRB:CASSLDYEQYF
clone_1905_H11	clonotype545H11	1	TRB:CASSFTVEQYF
clone_1906_H11	clonotype546H11	1	TRB:CASRGATEVFF
clone_1907_H11	clonotype547H11	1	TRB:CASSLWDEQYF
clone_1908_H11	clonotype548H11	1	TRB:CASSLGTGQYF
clone_1909_H11	clonotype549H11	1	TRB:CASSNNERLFF
clone_1910_H11	clonotype550H11	1	TRB:CASSHYNNQAPLF
clone_1911_H11	clonotype552H11	1	TRB:CASSEQSNTEVFF
clone_1912_H11	clonotype553H11	1	TRB:CASSDHRDTEVFF
clone_1913_H11	clonotype554H11	1	TRB:CASSDAGNSPLYF
clone_1914_H11	clonotype555H11	1	TRB:CASGDRSQNTLYF
clone_1915_H11	clonotype556H11	1	TRB:CASGETGGDTQYF
clone_1916_H11	clonotype557H11	1	TRB:CASKNRGHGNTLYF
clone_1917_H11	clonotype558H11	1	TRB:CASSRQGTNERLFF
clone_1918_H11	clonotype559H11	1	TRB:CASSPGTGKTEVFF
clone_1919_H11	clonotype560H11	1	TRB:CASSDRDSGNTLYF
clone_1920_H11	clonotype561H11	1	TRB:CASSDGGANTEVFF
clone_1921_H11	clonotype563H11	1	TRB:CASSDPPDRDEQYF
clone_1922_H11	clonotype564H11	1	TRB:CASSDAAGNTEVFF
clone_1923_H11	clonotype565H11	1	TRB:CASSVRGGQNTLYF
clone_1924_H11	clonotype566H11	1	TRB:CASSVGGSAETLYF
clone_1925_H11	clonotype569H11	1	TRB:CASSQTGGTLYF
clone_1926_H11	clonotype570H11	1	TRB:CASSRSSYEQYF
clone_1927_H11	clonotype571H11	1	TRB:CASSYRNSPLYF
clone_1928_H11	clonotype574H11	1	TRB:CASSSWYAEQFF
clone_1929_H11	clonotype575H11	1	TRB:CGASPGHYNSPLYF
clone_1930_H11	clonotype576H11	1	TRB:CGARKGAYNSPLYF
clone_1931_H11	clonotype577H11	1	TRB:CGARDWGNTGQLYF
clone_1932_H11	clonotype578H11	1	TRB:CGARDWGSSYEQYF
clone_1933_H11	clonotype579H11	1	TRB:CGARDPGSGNTLYF
clone_1934_H11	clonotype580H11	1	TRB:CGARGLGGAETLYF
clone_1935_H11	clonotype582H11	1	TRB:CAWSHWGGRDTQYF;TRA:CATSNSNNRIFF
clone_1936_H11	clonotype583H11	1	TRB:CASRQGGGNSDYTF;TRA:CILNATGYQNFYF
clone_1937_H11	clonotype584H11	1	TRB:CASSDGGDTGQLYF;TRA:CAASRQGGSAKLIF;TRA:CILRADYANKMIF
clone_1938_H11	clonotype585H11	1	TRB:CASSSGKYEQYF;TRA:CAAQVVGQLTF
clone_1939_H11	clonotype586H11	1	TRB:CAWSRIGVGDTQYF;TRA:CAADAGYQNFYF
clone_1940_H11	clonotype587H11	1	TRB:CAWSLTRIGAEQFF;TRA:CAPANSGTYQRF
clone_1941_H11	clonotype588H11	1	TRB:CAWSLLGDQNTLYF;TRA:CAAITNTNKVVF
clone_1942_H11	clonotype589H11	1	TRB:CAWSLQGIHSDYTF;TRA:CAIETNYNVLYF
clone_1943_H11	clonotype590H11	1	TRB:CASGEGGSYEQYF;TRA:CALRNSNNRIFF
clone_1944_H11	clonotype591H11	1	TRB:CASSGGLGPYEQYF;TRA:CAIDLGYNKLTF
clone_1945_H11	clonotype594H11	1	TRB:CASSFRDSPYEQYF;TRB:CASSRQNSPLYF;TRA:CAMNAAGGYKVVF
clone_1946_H11	clonotype595H11	1	TRB:CASSPTSNTLYF;TRA:CALEGGAGNKLTF
clone_1947_H11	clonotype596H11	1	TRB:CASSPTGGHYEQYF;TRB:CAWRPLGSQNTLYF;TRA:CALRRGSNAKLTF
clone_1948_H11	clonotype597H11	1	TRB:CAWSLGLSGNTLYF;TRA:CAIDRGTGSKLSF
clone_1949_H11	clonotype598H11	1	TRB:CAWLWGGNQDTQYF;TRA:CALNNNAGAKLTF
clone_1950_H11	clonotype599H11	1	TRB:CASRGQVQAPLF;TRA:CAAGRYNVLYF
clone_1951_H11	clonotype600H11	1	TRB:CASTSNERLFF;TRA:CAMGGGSNYKLTF
clone_1952_H11	clonotype601H11	1	TRB:CASRGGSAETLYF;TRA:CAMVHNNNNAPRF
clone_1953_H11	clonotype602H11	1	TRB:CASRRGETGQLYF;TRA:CAMEYNAGAKLTF
clone_1954_H11	clonotype603H11	1	TRB:CASGDRGWDTQYF;TRA:CAMWGGSNAKLTF;TRA:CVVVITGNTGKLIF
clone_1955_H11	clonotype604H11	1	TRB:CASSDVGGATEVFF;TRA:CASSSSGSWQLIF
clone_1956_H11	clonotype605H11	1	TRB:CASSQEGAETLYF;TRA:CALEQRSGSWQLIF
clone_1957_H11	clonotype606H11	1	TRB:CASSQDWNTEVFF;TRA:CALVTSSGSWQLIF
clone_1958_H11	clonotype607H11	1	TRB:CASSRDLNERLFF;TRA:CAVLYNTNTGKLTF
clone_1959_H11	clonotype608H11	1	TRB:CAWSRDNSQNTLYF;TRA:CAIWGVNAGAKLTF
clone_1960_H11	clonotype609H11	1	TRB:CAWSLAGGAREQYF;TRA:CALEPGYNQGKLIF
clone_1961_H11	clonotype610H11	1	TRB:CASSLRGEVFF;TRA:CAAEGQGGSAKLIF
clone_1962_H11	clonotype611H11	1	TRB:CASSPDSGNTLYF;TRA:CAAHTNAYKVIF
clone_1963_H11	clonotype612H11	1	TRB:CASSDAPNTEVFF;TRA:CAAKGMSNYNVLYF;TRA:CALSDQTGFASALTF
clone_1964_H11	clonotype613H11	1	TRB:CASRDRAIYEQYF;TRA:CAIDPNNYAQGLTF
clone_1965_H11	clonotype614H11	1	TRB:CASGGGQQDTQYF;TRA:CAADTNAYKVIF
clone_1966_H11	clonotype615H11	1	TRB:CASSDAQNTGQLYF;TRA:CAELYNVLYF
clone_1967_H11	clonotype616H11	1	TRB:CASSAVGNQDTQYF;TRA:CAALTTASLGNLQF
clone_1968_H11	clonotype618H11	1	TRB:CASSHRENTLYF;TRA:CAANYNQGKLIF
clone_1969_H11	clonotype619H11	1	TRB:CASSRSSYEQYF;TRA:CAFQGGSAKLIF
clone_1970_H11	clonotype620H11	1	TRB:CASSQEGNSNERLFF;TRB:CASSRSSYEQYF;TRA:CAVSGSNYQLIW
clone_1971_H11	clonotype621H11	1	TRB:CASSWTEDTQYF;TRA:CAASPNTNKVVF
clone_1972_H11	clonotype622H11	1	TRB:CSSSQGGTLYF;TRA:CALERSTNTGKLTF
clone_1973_H11	clonotype623H11	1	TRB:CASSSRDRYNSPLYF;TRB:CGARSVNSGNTLYF;TRA:CALSGTSSGQKLVF;TRA:CAVSRGGTYQRF
clone_1974_H11	clonotype624H11	1	TRB:CGARDRNNNQAPLF;TRA:CAVSNYAQGLTF
clone_1975_H11	clonotype625H11	1	TRB:CASSQESNSDYTF;TRA:CAAEVDGSSGNKLIF
clone_1976_H11	clonotype626H11	1	TRB:CASSQARVAEQFF;TRA:CALNYNTNTGKLTF;TRA:CAVSGSALGRLHF
clone_1977_H11	clonotype627H11	1	TRB:CASSPGQPETLYF;TRA:CAVKGNMGYKLTF
clone_1978_H11	clonotype628H11	1	TRB:CASSAGQGYEQYF;TRA:CALRSSNYNVLYF
clone_1979_H11	clonotype629H11	1	TRB:CASSMDREQYF;TRA:CAVSAGGNYQLIW
clone_1980_H11	clonotype630H11	1	TRB:CASSRQDTQYF;TRA:CAIDQASSSFSKLVF
clone_1981_H11	clonotype631H11	1	TRB:CASSSQQAPLF;TRA:CAPNNNAPRF
clone_1982_H11	clonotype632H11	1	TRB:CASRLNYEQYF;TRA:CAIARNTEGADRLTF
clone_1983_H11	clonotype633H11	1	TRB:CASSSGVEQYF;TRA:CAASPDSNYQLIW
clone_1984_H11	clonotype634H11	1	TRB:CASSDRGAETLYF;TRA:CAASERYTNKVVF
clone_1985_H11	clonotype635H11	1	TRB:CASSDRDRDTQYF;TRA:CAVSRNSNNRIFF
clone_1986_H11	clonotype636H11	1	TRB:CASGDLTDTEVFF;TRA:CAANSNNRIFF
clone_1987_H11	clonotype637H11	1	TRB:CASSLTGEGSDYTF;TRA:CASISGSFNKLTF
clone_1988_H11	clonotype638H11	1	TRB:CASSEGRGYAEQFF;TRA:CAAESSNTNKVVF
clone_1989_H11	clonotype639H11	1	TRB:CASSDALGGYEQYF;TRA:CAEVNTGNYKYVF
clone_1990_H11	clonotype640H11	1	TRB:CASSQVNSDYTF;TRA:CALNPNSNNRIFF
clone_1991_H11	clonotype641H11	1	TRB:CASNGGWGEQYF;TRA:CAADFTGANTGKLTF
clone_1992_H11	clonotype642H11	1	TRB:CASSRGNSPLYF;TRA:CAVSATGNYKYVF
clone_1993_H11	clonotype643H11	1	TRB:CASSYRNSDYTF;TRA:CAATGTGGYKVVF
clone_1994_H11	clonotype644H11	1	TRB:CASSFPTGDSDYTF;TRB:CGASAWGNQDTQYF;TRA:CAMRDRGNNRIFF
clone_1995_H11	clonotype645H11	1	TRB:CASSSGSYEQYF;TRA:CAVPTEGADRLTF
clone_1996_H11	clonotype646H11	1	TRB:CASSQGAHAEQFF;TRA:CAAVRGSALGRLHF
clone_1997_H11	clonotype647H11	1	TRB:CAWSTGHNYAEQFF;TRA:CAVRGNNNNAPRF
clone_1998_H11	clonotype648H11	1	TRB:CAWSPGTSGERLFF;TRA:CAVSMRSGYNKLTF
clone_1999_H11	clonotype649H11	1	TRB:CAWSLGQSGNTLYF;TRA:CAANYNQGKLIF;TRA:CALSPNNRIFF
[truncated: 318 more rows]

## Sheet: p-aKO2
Tcell_clone_rank	clonotype_id	count	cdr3s_aa
clone_1_seq_2	H11_clonotype1	314	TRB:CASSDSLGFNYAEQFF;TRA:CAMREGWDSNYQLIW
clone_2_seq_2	H11_clonotype2	185	TRB:CTCSADPGAYAEQFF;TRA:CALRAGGSNAKLTF
clone_3_seq_2	H11_clonotype3	137	TRB:CASRDRVYEQYF;TRA:CAVSAVSYGNEKITF
clone_4_seq_2	H11_clonotype4	118	TRB:CASSDSLGFNYAEQFF
clone_5_seq_2	H11_clonotype5	93	TRB:CASSPGTGGYEQYF;TRA:CAANTGYQNFYF;TRA:CAVSARGGSNYKLTF
clone_6_seq_2	H11_clonotype6	79	TRB:CASSDSLGFNYAEQFF;TRA:CAMREGWDSNYQLIW
clone_7_seq_2	H11_clonotype7	48	TRB:CASSHGGRSAETLYF;TRB:CASSLPRNERLFF;TRA:CAAEAMSNYNVLYF
clone_8_seq_2	H11_clonotype10	42	TRB:CASSQERLGGLEQYF;TRA:CVWGSNNRIFF
clone_9_seq_2	H11_clonotype8	41	TRB:CTCSADLTGQLYF;TRA:CAANVNTGNYKYVF
clone_10_seq_2	H11_clonotype9	41	TRB:CASRRQGNTEVFF;TRA:CAASGTGYQNFYF
clone_11_seq_2	H11_clonotype12	39	TRB:CASSLGGASAETLYF;TRA:CAAEAFSNYNVLYF;TRA:CALGLLSGSFNKLTF
clone_12_seq_2	H11_clonotype11	35	TRB:CASSQAGASAETLYF;TRA:CAAEALSNYNVLYF
clone_13_seq_2	H11_clonotype14	35	TRB:CASSLTGGLAEQFF;TRA:CALYNTNTGKLTF
clone_14_seq_2	H11_clonotype13	32	TRB:CASSLVVGPSQNTLYF;TRA:CAASAMDTNAYKVIF
clone_15_seq_2	H11_clonotype15	32	TRB:CASSIEAQDTQYF;TRA:CATVEGADRLTF
clone_16_seq_2	H11_clonotype16	31	TRB:CASRTGDNQAPLF;TRA:CAAPSNMGYKLTF;TRA:CAEMLSGSFNKLTF
clone_17_seq_2	H11_clonotype19	28	TRB:CASSLGGAATEVFF;TRA:CVLTSNYNQGKLIF
clone_18_seq_2	H11_clonotype20	27	TRB:CASSGTGVSYEQYF;TRA:CAERTSSGQKLVF;TRA:CAVHTNAYKVIF
clone_19_seq_2	H11_clonotype18	26	TRB:CASSLGGREQYF;TRA:CAVRPDTNAYKVIF
clone_20_seq_2	H11_clonotype21	26	TRB:CASGDGGHEQYF;TRA:CAASRTGNYKYVF
clone_21_seq_2	H11_clonotype17	25	TRB:CASSQEGRTGGGEVFF;TRA:CALRLNNNNAPRF
clone_22_seq_2	H11_clonotype22	22	TRB:CASGDVGTAETLYF;TRA:CAAYVTGSGGKLTL
clone_23_seq_2	H11_clonotype23	20	TRB:CASSQDGRTGNERLFF;TRA:CAASRNNNNAPRF
clone_24_seq_2	H11_clonotype25	18	TRB:CASSPTGGENTLYF;TRA:CAVRGTGYQNFYF
clone_25_seq_2	H11_clonotype24	16	TRB:CASRDSAETLYF;TRA:CAAEPTGGNNKLTF;TRA:CILRDSGGSNYKLTF
clone_26_seq_2	H11_clonotype26	16	TRB:CASGDVGTAETLYF
clone_27_seq_2	H11_clonotype32	15	TRB:CGARVQGSSNERLFF;TRA:CADTEGADRLTF
clone_28_seq_2	H11_clonotype34	15	TRB:CASSTGTKDTQYF;TRA:CALGRNSNNRIFF
clone_29_seq_2	H11_clonotype27	14	TRB:CAWGRGEVFF;TRA:CAIERTGNYKYVF
clone_30_seq_2	H11_clonotype30	14	TRB:CASSQEGRTDNQAPLF
clone_31_seq_2	H11_clonotype39	14	TRB:CASSLWGQSSSAETLYF;TRA:CAMREGGNYNQGKLIF
clone_32_seq_2	H11_clonotype37	13	TRB:CASSQAGASAETLYF;TRA:CAAEAMSNYNVLYF
clone_33_seq_2	H11_clonotype28	12	TRB:CASSLRTEVFF;TRA:CALSAQGTGSKLSF
clone_34_seq_2	H11_clonotype31	12	TRB:CASGGRENTGQLYF;TRA:CAASWGGRALIF
clone_35_seq_2	H11_clonotype33	12	TRB:CASRPGGGNTGQLYF;TRA:CAVSGTNTGKLTF
clone_36_seq_2	H11_clonotype40	12	TRB:CASSQDGRTGDERLFF;TRA:CAAPRNNNNAPRF
clone_37_seq_2	H11_clonotype41	12	TRB:CASGGLGRYAEQFF;TRA:CAMRGTSSGQKLVF
clone_38_seq_2	H11_clonotype46	12	TRB:CASGDPGGAFQDTQYF;TRA:CALERNAGAKLTF;TRA:CAVMGGSNAKLTF
clone_39_seq_2	H11_clonotype29	11	TRB:CASSHTGGAHEQYF;TRA:CATMNYGSSGNKLIF
clone_40_seq_2	H11_clonotype42	11	TRB:CASSRTGNSAETLYF;TRA:CAAELMSNYNVLYF;TRA:CAVSSDRGSALGRLHF
clone_41_seq_2	H11_clonotype50	11	TRB:CTCSAAGLGVAETLYF;TRA:CAVSGHDSGYNKLTF
clone_42_seq_2	H11_clonotype36	10	TRB:CASSESSQNTLYF;TRA:CAARTQVVGQLTF
clone_43_seq_2	H11_clonotype38	10	TRB:CASSQSGTGDNYAEQFF;TRA:CAASEHSNMGYKLTF
clone_44_seq_2	H11_clonotype43	10	TRB:CASRPLQGANTEVFF;TRA:CALERFSGGSNAKLTF;TRA:CALSFFNTGNYKYVF
clone_45_seq_2	H11_clonotype44	10	TRB:CASSYRGENTEVFF;TRA:CAVRSWNSNNRIFF
clone_46_seq_2	H11_clonotype48	10	TRB:CASSLGGTEVFF;TRA:CAVRNTGYQNFYF
clone_47_seq_2	H11_clonotype51	10	TRB:CAWGRQNTLYF;TRA:CAIENYGNEKITF;TRA:CALSDRATGGNNKLTF
clone_48_seq_2	H11_clonotype52	10	TRB:CASSIEQGTEVFF;TRA:CAFNVGDNSKLIW
clone_49_seq_2	H11_clonotype45	9	TRB:CASSRDTQYF;TRA:CAAEVPTGGNNKLTF
clone_50_seq_2	H11_clonotype47	9	TRB:CASSQEGRTDNQAPLF;TRB:CASSYSAETLYF;TRA:CALGANNNNAPRF
clone_51_seq_2	H11_clonotype49	9	TRB:CASSQETGFAETLYF;TRA:CAARGPPSSFSKLVF;TRA:CAVSAGTGYQNFYF
clone_52_seq_2	H11_clonotype53	9	TRB:CASGGQGNSDYTF;TRB:CASGGQGNSDYTF;TRB:CASSRDSFSGNTLYF;TRA:CAASVGTNTGKLTF
clone_53_seq_2	H11_clonotype54	9	TRB:CASSGTGGNYAEQFF;TRA:CAVRIMATGGNNKLTF
clone_54_seq_2	H11_clonotype55	9	TRB:CASSQTGGSAETLYF;TRA:CAAEFMSNYNVLYF
clone_55_seq_2	H11_clonotype57	9	TRB:CASSQDQQGAGNTLYF;TRA:CAMRRAEGADRLTF;TRA:CAVSARPGYGNEKITF
clone_56_seq_2	H11_clonotype58	9	TRB:CASGDARAYNSPLYF;TRA:CAYYSNNRLTL
clone_57_seq_2	H11_clonotype35	8	TRB:CASSQEGRTGGGEVFF;TRA:CAAGRNNNNAPRF;TRA:CALDNNAGAKLTF
clone_58_seq_2	H11_clonotype56	8	TRB:CASGRGGVVAETLYF;TRA:CAAEPMSNYNVLYF
clone_59_seq_2	H11_clonotype60	8	TRB:CGASFRGGDTEVFF;TRA:CALSRNSNNRIFF
clone_60_seq_2	H11_clonotype66	8	TRB:CASSPNRNTGQLYF;TRA:CAVSGGSNAKLTF
clone_61_seq_2	H11_clonotype67	8	TRB:CASSQEGGNNYAEQFF;TRA:CAVSTLNTGNYKYVF
clone_62_seq_2	H11_clonotype68	8	TRB:CASSPRPDNNQAPLF;TRB:CASSQDGRTGNERLFF;TRA:CAAGRNNNNAPRF
clone_63_seq_2	H11_clonotype69	8	TRB:CASSAYRDTSGNTLYF;TRA:CAASEGMGYKLTF;TRA:CAVSMLSGSFNKLTF
clone_64_seq_2	H11_clonotype72	8	TRB:CASSPAGGYEQYF;TRA:CATGFASALTF
clone_65_seq_2	H11_clonotype59	7	TRB:CASSLQDSGNTLYF;TRB:CAWSPSNTEVFF;TRA:CAAEARNYAQGLTF
clone_66_seq_2	H11_clonotype61	7	TRB:CASRRQGNTEVFF
clone_67_seq_2	H11_clonotype63	7	TRB:CASSQEGRTGGGEVFF
clone_68_seq_2	H11_clonotype65	7	TRB:CASSQVGGRAQDTQYF;TRB:CTCSAGRGSSEVFF;TRA:CAMERQGGRALIF
clone_69_seq_2	H11_clonotype70	7	TRB:CTCSATGGRYAEQFF;TRA:CIVTAASSGSWQLIF
clone_70_seq_2	H11_clonotype74	7	TRB:CASSDLGSAETLYF;TRB:CTCSADGDSGNTLYF;TRA:CAAYVTGSGGKLTL
clone_71_seq_2	H11_clonotype79	7	TRB:CASRDSGNTLYF;TRA:CALSPYSGTYQRF
clone_72_seq_2	H11_clonotype80	7	TRB:CASGDGGNQAPLF;TRA:CAGNSNNRIFF
clone_73_seq_2	H11_clonotype62	6	TRB:CASSPLGVYAEQFF;TRA:CAVSNNYAQGLTF
clone_74_seq_2	H11_clonotype71	6	TRB:CTCSAPGQGNERLFF;TRA:CAASAGSGYNKLTF
clone_75_seq_2	H11_clonotype73	6	TRB:CASSPRDLDTQYF;TRA:CAASATGGNNKLTF
clone_76_seq_2	H11_clonotype75	6	TRB:CASSIWGANSDYTF;TRB:CASSQEGRTGGGEQYF;TRA:CAVSPNNNNAPRF
clone_77_seq_2	H11_clonotype81	6	TRB:CASGRTGGNYAEQFF;TRA:CAVRKMATGGNNKLTF
clone_78_seq_2	H11_clonotype84	6	TRB:CASGDVGTAETLYF;TRA:CAAYVTGSGGKLTL
clone_79_seq_2	H11_clonotype85	6	TRB:CASSRGGGDSDYTF;TRA:CAAEDAGNYKYVF
clone_80_seq_2	H11_clonotype86	6	TRB:CASSSGTKDTQYF;TRA:CALGRNSNNRIFF
clone_81_seq_2	H11_clonotype87	6	TRB:CASSQDGRTGDAEQFF;TRA:CAVSVNNNNAPRF
clone_82_seq_2	H11_clonotype89	6	TRB:CASSRDRVPGQLYF;TRA:CAVSYNTNTGKLTF
clone_83_seq_2	H11_clonotype90	6	TRB:CTCSADAGHERLFF;TRA:CALKGGGSNAKLTF
clone_84_seq_2	H11_clonotype91	6	TRB:CASSSTGGARTGQLYF;TRA:CALTDSNYQLIW
clone_85_seq_2	H11_clonotype92	6	TRB:CASSPDPLDSDYTF;TRB:CASSRSGNTLYF;TRA:CAVSPDTNAYKVIF
clone_86_seq_2	H11_clonotype101	5	TRB:CASGGLGRYAEQFF
clone_87_seq_2	H11_clonotype64	5	TRB:CASSFLGLDAEQFF;TRA:CAASKGGTNAYKVIF
clone_88_seq_2	H11_clonotype78	5	TRB:CASSFNSAETLYF;TRA:CAMREGTTASLGKLQF;TRA:CAMRNSGGSNYKLTF
clone_89_seq_2	H11_clonotype82	5	TRB:CASGRPDWGGYAEQFF;TRB:CASSRQNTEVFF;TRA:CAMRERDGGSNAKLTF;TRA:CATHYSNNRLTL
clone_90_seq_2	H11_clonotype88	5	TRB:CASSPNRNTGQLYF;TRA:CARTGGSNAKLTF
clone_91_seq_2	H11_clonotype98	5	TRB:CASSYFRGANTEVFF;TRA:CALSDQDAYKVIF
clone_92_seq_2	H11_clonotype100	4	TRB:CASGDWGDEQYF;TRA:CIVTDSAGNKLTF
clone_93_seq_2	H11_clonotype102	4	TRB:CASGDRQVNQDTQYF;TRA:CAVSGPNTGKLTF
clone_94_seq_2	H11_clonotype103	4	TRB:CASRTRELYF;TRA:CALSGSGGSNYKLTF
clone_95_seq_2	H11_clonotype105	4	TRB:CASSSGFTGQLYF;TRA:CALGATGGNNKLTF
clone_96_seq_2	H11_clonotype107	4	TRB:CAWSLPGTGKNSDYTF;TRA:CAVRRMATGGNNKLTF
clone_97_seq_2	H11_clonotype110	4	TRB:CASSLDTGDEQYF;TRA:CAASDTNAYKVIF
clone_98_seq_2	H11_clonotype111	4	TRB:CASSTGTKDTQYF;TRA:CALSRNSNNRIFF
clone_99_seq_2	H11_clonotype112	4	TRB:CASSQVGGAGQNTLYF;TRA:CAASMDNTNKVVF
clone_100_seq_2	H11_clonotype113	4	TRB:CASSQEGRTGGGEVFF;TRA:CAPMRNNNNAPRF
clone_101_seq_2	H11_clonotype114	4	TRB:CASSQDGRTGNERLFF;TRA:CALAHNNNNAPRF;TRA:CAVSMPGNTGKLIF
clone_102_seq_2	H11_clonotype115	4	TRB:CASSLSGRTNSDYTF;TRA:CAARGPGSFNKLTF
clone_103_seq_2	H11_clonotype116	4	TRB:CASSWTGGTNTEVFF;TRA:CAMRSITGNTGKLIF
clone_104_seq_2	H11_clonotype117	4	TRB:CASSLEGRDNSPLYF;TRB:CGARQGKDTGQLYF;TRA:CALRGGSNAKLTF
clone_105_seq_2	H11_clonotype120	4	TRB:CTCSALGGRGDTQYF;TRA:CATPDTNAYKVIF
clone_106_seq_2	H11_clonotype121	4	TRB:CTCSAVYKSNERLFF;TRA:CALAGTNTGKLTF
clone_107_seq_2	H11_clonotype122	4	TRB:CTCSALGGRSYEQYF;TRA:CALEGSGGNNKLTF
clone_108_seq_2	H11_clonotype123	4	TRB:CASSLWGQSSSAETLYF;TRA:CAMREGGNYNQGKLIF
clone_109_seq_2	H11_clonotype124	4	TRB:CASSTGNTGQLYF;TRA:CAASANYGNEKITF
clone_110_seq_2	H11_clonotype125	4	TRB:CASGEPGDQDTQYF;TRA:CALERNAGAKLTF
clone_111_seq_2	H11_clonotype76	4	TRA:CALERFSGGSNAKLTF
clone_112_seq_2	H11_clonotype77	4	TRB:CASSPNWGRQDTQYF;TRA:CAANTGANTGKLTF
clone_113_seq_2	H11_clonotype83	4	TRA:CAAEVPTGGNNKLTF
clone_114_seq_2	H11_clonotype93	4	TRB:CASSQEVTGGFTGQLYF;TRA:CAVSADNAPRF
clone_115_seq_2	H11_clonotype95	4	TRB:CASSQDGRTGNERLFF
clone_116_seq_2	H11_clonotype96	4	TRB:CASSLLLGQNTLYF
clone_117_seq_2	H11_clonotype97	4	TRB:CASSPGGRQDTQYF;TRA:CAIEATASLGKLQF
clone_118_seq_2	H11_clonotype99	4	TRB:CASSPLQEISNERLFF;TRA:CAMREGGNYNQGKLIF
clone_119_seq_2	H11_clonotype104	3	TRB:CASSQEGGPTEVFF;TRA:CAVSGDMGYKLTF
clone_120_seq_2	H11_clonotype106	3	TRB:CASSQVGQNTEVFF;TRA:CAASTNSNNRIFF
clone_121_seq_2	H11_clonotype108	3	TRB:CASRGGLGYEQYF;TRA:CALAGNYKYVF
clone_122_seq_2	H11_clonotype109	3	TRB:CASSRDFQDTQYF;TRA:CAASVVSNNRLTL
clone_123_seq_2	H11_clonotype118	3	TRB:CTCSAGRGSSEVFF;TRA:CALEGYANKMIF
clone_124_seq_2	H11_clonotype119	3	TRB:CTCSADGGVYAEQFF
clone_125_seq_2	H11_clonotype126	3	TRB:CASGGLGRYAEQFF;TRA:CAMRGTSSGQKLVF
clone_126_seq_2	H11_clonotype127	3	TRB:CASSQEGTNTGQLYF;TRA:CAAHNNNAPRF;TRA:CAASESNYQLIW
clone_127_seq_2	H11_clonotype128	3	TRB:CASSRTTNNQAPLF;TRA:CAAGTNAYKVIF
clone_128_seq_2	H11_clonotype130	3	TRB:CASSDRGAQAPLF;TRA:CAAATNSAGNKLTF
clone_129_seq_2	H11_clonotype131	3	TRB:CASSETGENTLYF;TRA:CAASKGGTNAYKVIF
clone_130_seq_2	H11_clonotype132	3	TRB:CASSLRRGEVFF;TRA:CALRGTGANTGKLTF
clone_131_seq_2	H11_clonotype133	3	TRB:CASSPGQYEQYF;TRA:CALAHRGSALGRLHF
clone_132_seq_2	H11_clonotype136	3	TRB:CASSDPGQGWEQYF;TRA:CAASAGRGTGSKLSF
clone_133_seq_2	H11_clonotype137	3	TRB:CASSMEDWGYEQYF;TRA:CALSMHNQGKLIF
clone_134_seq_2	H11_clonotype138	3	TRB:CASSLAGGLAEQFF;TRA:CALYNTNTGKLTF
clone_135_seq_2	H11_clonotype139	3	TRB:CASSGLGFYEQYF;TRA:CALRPMDYANKMIF
clone_136_seq_2	H11_clonotype140	3	TRB:CASSSQGDSDYTF;TRA:CAAVTGYQNFYF
clone_137_seq_2	H11_clonotype141	3	TRB:CASSRGQGARDTEVFF;TRA:CAASANVGDNSKLIW;TRA:CAAYVTGSGGKLTL
clone_138_seq_2	H11_clonotype143	3	TRB:CASSLGGSSAETLYF;TRA:CAAEALSNYNVLYF
clone_139_seq_2	H11_clonotype146	3	TRB:CASSLFLGGYAEQFF;TRB:CASSNRGRDTEVFF;TRA:CAVSASYNQGKLIF
clone_140_seq_2	H11_clonotype148	3	TRB:CTCSADGGVYAEQFF;TRA:CALRSGGSNAKLTF
clone_141_seq_2	H11_clonotype150	3	TRB:CASSIEGAGNTLYF;TRA:CALGDQNYAQGLTF
clone_142_seq_2	H11_clonotype152	3	TRB:CASGQGTGQLYF;TRA:CAASPNYGNEKITF
clone_143_seq_2	H11_clonotype153	3	TRB:CASGWGAGEQYF;TRA:CAASANYGNEKITF
clone_144_seq_2	H11_clonotype154	3	TRB:CASDPGQNQAPLF;TRA:CAVRPPNQGGSAKLIF
clone_145_seq_2	H11_clonotype155	3	TRB:CASSLSSGNTLYF;TRB:CTCSEGQAERLFF;TRA:CAASPNYGNEKITF
clone_146_seq_2	H11_clonotype156	3	TRB:CASGGTGAYEQYF;TRA:CALSGGSGGSNYKLTF
clone_147_seq_2	H11_clonotype157	3	TRB:CASGDAGGAREQYF;TRA:CALVDRRTGSGGKLTL
clone_148_seq_2	H11_clonotype158	3	TRB:CASGDASANSDYTF;TRA:CALEHNAGAKLTF
clone_149_seq_2	H11_clonotype159	3	TRB:CASGDAAGGDTLYF;TRA:CALERNAGAKLTF
clone_150_seq_2	H11_clonotype160	3	TRB:CASGDAGVGSDYTF;TRA:CALEHNAGAKLTF
clone_151_seq_2	H11_clonotype129	2	TRB:CASSQTVNSDYTF;TRA:CALSERTGGYKVVF
clone_152_seq_2	H11_clonotype134	2	TRB:CASSRDRGAPLF;TRA:CALVQGGRALIF
clone_153_seq_2	H11_clonotype135	2	TRB:CASSQGQYEQYF;TRA:CAASSPYQGGRALIF
clone_154_seq_2	H11_clonotype144	2	TRB:CASSRGTGRDTQYF;TRB:CASSSGTKDTQYF;TRA:CALGKNSNNRIFF
clone_155_seq_2	H11_clonotype145	2	TRB:CASSLETLYF;TRB:CASSLLLGQNTLYF;TRA:CALGDPGTQVVGQLTF
clone_156_seq_2	H11_clonotype147	2	TRB:CASSPMGQGRSEQYF;TRA:CAVRDSNYQLIW
clone_157_seq_2	H11_clonotype149	2	TRB:CTCSADGGVYAEQFF;TRA:CALRGGGSNAKLTF;TRA:CVWGSNNRIFF
clone_158_seq_2	H11_clonotype151	2	TRB:CASGDNNERLFF;TRA:CAAEAETGGYKVVF
clone_159_seq_2	H11_clonotype161	2	TRB:CASSQEGRTGGGEVFF;TRA:CALRPNNNNAPRF
clone_160_seq_2	H11_clonotype163	2	TRB:CASRLGGLEQYF;TRA:CAVSNTNAYKVIF
clone_161_seq_2	H11_clonotype164	2	TRB:CGARLGGQNTLYF;TRA:CALRRTGYQNFYF
clone_162_seq_2	H11_clonotype166	2	TRB:CASSGLSQNTLYF;TRB:CASSLIGQGYEQYF;TRA:CAASGSNNRIFF
clone_163_seq_2	H11_clonotype168	2	TRB:CASSRTGSNERLFF;TRA:CALGVHTGNYKYVF;TRA:CALSAGTGGYKVVF
clone_164_seq_2	H11_clonotype171	2	TRB:CASSQDVGNQAPLF;TRA:CAASIRSNNRIFF
clone_165_seq_2	H11_clonotype174	2	TRB:CASGDAAGGDTLYF;TRA:CALERNAGAKLTF
clone_166_seq_2	H11_clonotype175	2	TRB:CASSDGGQGYAEQFF;TRA:CAASKLPGTGSNRLTF
clone_167_seq_2	H11_clonotype177	2	TRB:CASSFDRGDTQYF;TRB:CASSPGQGGSQNTLYF;TRA:CAASSGSWQLIF
clone_168_seq_2	H11_clonotype178	2	TRB:CASSQEGQGAEQFF;TRA:CAVNYNQGKLIF
clone_169_seq_2	H11_clonotype182	2	TRB:CASRPLGTNTGQLYF;TRA:CALGDLVDYANKMIF
clone_170_seq_2	H11_clonotype185	2	TRB:CASSQEGTNTGQLYF;TRA:CAMRGITGNTGKLIF
clone_171_seq_2	H11_clonotype188	2	TRB:CASSRGLNQDTQYF;TRB:CTCSAGQGMGQDTQYF;TRA:CIVTSLDAQGLTF
clone_172_seq_2	H11_clonotype189	2	TRB:CASSLEQNTEVFF;TRA:CAAEATSSGQKLVF;TRA:CAAGTGYQNFYF
clone_173_seq_2	H11_clonotype190	2	TRB:CASSQEGHSNERLFF;TRA:CAASEGGRALIF
clone_174_seq_2	H11_clonotype191	2	TRB:CASSLQGANYAEQFF;TRA:CALGEVSNYNVLYF;TRA:CAVGTGGYKVVF
clone_175_seq_2	H11_clonotype192	2	TRB:CASSLGSYAEQFF;TRA:CAVSTTGGYKVVF
clone_176_seq_2	H11_clonotype193	2	TRB:CASSQGTGVYEQYF;TRA:CATDALSNYNVLYF
clone_177_seq_2	H11_clonotype194	2	TRB:CASSDAWFNQDTQYF;TRA:CALGDRITGNTGKLIF
clone_178_seq_2	H11_clonotype196	2	TRB:CTCSARTGGADQDTQYF;TRA:CALGNSAGNKLTF
clone_179_seq_2	H11_clonotype197	2	TRB:CASSSDWGTYEQYF;TRA:CAASSKGNMGYKLTF
clone_180_seq_2	H11_clonotype200	2	TRB:CASSLAWRDTEVFF;TRA:CAIDHNTNTGKLTF
clone_181_seq_2	H11_clonotype201	2	TRB:CASSQVGSANTEVFF;TRA:CALAHNAGAKLTF;TRA:CALAPSSGSWQLIF
clone_182_seq_2	H11_clonotype202	2	TRB:CASSIQGTSAETLYF;TRA:CAAEAYSGYNKLTF
clone_183_seq_2	H11_clonotype203	2	TRB:CASGRGGVVAETLYF;TRA:CAAEVMSNYNVLYF;TRA:CALSATSSGQKLVF
clone_184_seq_2	H11_clonotype204	2	TRB:CASSLFLGGYAEQFF;TRB:CASSNRGRDTEVFF;TRA:CAMRGNTGYQNFYF;TRA:CAVSASYNQGKLIF
clone_185_seq_2	H11_clonotype205	2	TRB:CASRPDWGGYEQYF;TRA:CALRLNNNNAPRF;TRA:CAVSIYQGGRALIF
clone_186_seq_2	H11_clonotype208	2	TRB:CASSFGGRVDTQYF;TRA:CAIVWNQTGFASALTF;TRA:CALFNVGDNSKLIW
clone_187_seq_2	H11_clonotype209	2	TRB:CASSLGMRAETLYF;TRB:CTCSADGGLYAEQFF;TRA:CALGGTGNTGKLIF
clone_188_seq_2	H11_clonotype210	2	TRB:CTCSANYNSPLYF;TRA:CALRRGSSGNKLIF;TRA:CAMRDTNNNAPRF
clone_189_seq_2	H11_clonotype211	2	TRB:CASSRGQGSGNTLYF;TRA:CAMRGYSGGSNAKLTF
clone_190_seq_2	H11_clonotype212	2	TRB:CASSLAGYNSPLYF;TRA:CAMREGSSGGSNYKLTF
clone_191_seq_2	H11_clonotype213	2	TRB:CASSPGQGAGNTLYF;TRB:CASSQDGGRGTEVFF;TRA:CATSNYNVLYF
clone_192_seq_2	H11_clonotype214	2	TRB:CASSLGGGIAETLYF;TRA:CAPPDGNNYAQGLTF
clone_193_seq_2	H11_clonotype215	2	TRB:CASRKDWGGFYEQYF;TRB:CASSQEGGSYEQYF;TRA:CILRGPGGSNAKLTF
clone_194_seq_2	H11_clonotype216	2	TRB:CTCSGLLSQNTLYF;TRA:CAVPSGGSNAKLTF
clone_195_seq_2	H11_clonotype217	2	TRB:CASSSLQGSGAEQFF;TRA:CALSDITGNTGKLIF;TRA:CAMTNSAGNKLTF
clone_196_seq_2	H11_clonotype218	2	TRB:CASSSPGQGAREQYF;TRA:CAADTNAYKVIF
clone_197_seq_2	H11_clonotype220	2	TRB:CASGVLGVQDTQYF;TRB:CASSISQGVAEQFF;TRA:CAVTSNNRIFF;TRA:CVLGPLQGGRALIF
clone_198_seq_2	H11_clonotype221	2	TRB:CASSLGQYNSPLYF;TRA:CAVNPFYQGGRALIF
clone_199_seq_2	H11_clonotype222	2	TRB:CASSLLGGRDYAEQFF;TRA:CAMREATGGNNKLTF
clone_200_seq_2	H11_clonotype224	2	TRB:CASSIVWSQNTLYF;TRA:CALSIIASSSFSKLVF
clone_201_seq_2	H11_clonotype225	2	TRB:CTCSADPAQTSAETLYF;TRA:CAMPGTQVVGQLTF;TRA:CAVSPGTGGYKVVF
clone_202_seq_2	H11_clonotype228	2	TRB:CASGVSRGEQYF;TRA:CALSDVGDNSKLIW
clone_203_seq_2	H11_clonotype229	2	TRB:CASSLGKNTLYF;TRA:CALSVDTNAYKVIF
clone_204_seq_2	H11_clonotype230	2	TRB:CASSPTKNTLYF;TRA:CALRNTGANTGKLTF
clone_205_seq_2	H11_clonotype232	2	TRB:CASGDAEGREQYF;TRA:CAAEAKGDTGYQNFYF;TRA:CAVTYNNNAPRF
clone_206_seq_2	H11_clonotype233	2	TRB:CASGDAGTGTEVFF;TRA:CALERNAGAKLTF
clone_207_seq_2	H11_clonotype234	2	TRB:CASSPGIGQDTQYF;TRA:CASLSGSFNKLTF
clone_208_seq_2	H11_clonotype235	2	TRB:CASGDAGGVTEVFF;TRA:CALSERYNQGKLIF;TRA:CALSERYNQGKLIF;TRA:CALSGATSSGQKLVF
clone_209_seq_2	H11_clonotype236	2	TRB:CASGDPGGVYAEQFF;TRA:CAGSNTNKVVF;TRA:CALERNAGAKLTF
clone_210_seq_2	H11_clonotype238	2	TRB:CASSPPTGGMYEQYF;TRA:CAVPTQVVGQLTF
clone_211_seq_2	H11_clonotype94	2	TRB:CGASWTGNYAEQFF;TRA:CAVSVGPNTGKLTF
clone_212_seq_2	H11_clonotype1001	1	TRB:CASSLGSSAETLYF;TRA:CAMRASSGSWQLIF
clone_213_seq_2	H11_clonotype1002	1	TRB:CASSQDWGGYEQYF;TRA:CAASGGASSSFSKLVF
clone_214_seq_2	H11_clonotype1003	1	TRB:CASSFVGAGNTLYF;TRA:CAMRETTGSGGKLTL
clone_215_seq_2	H11_clonotype1004	1	TRB:CASSRLINTGQLYF;TRA:CAMREGTGGNNKLTF
clone_216_seq_2	H11_clonotype1005	1	TRB:CASSGDAARNSPLYF;TRA:CAMRDSGGNYKPTF
clone_217_seq_2	H11_clonotype1006	1	TRB:CASSYGTGGYAEQFF;TRA:CALVERGSALGRLHF
clone_218_seq_2	H11_clonotype1007	1	TRB:CTCSASGNTEVFF;TRA:CAAVNNRIFF
clone_219_seq_2	H11_clonotype1008	1	TRB:CASSQDPRRSQNTLYF;TRA:CALSDRYGSSGNKLIF
clone_220_seq_2	H11_clonotype1009	1	TRB:CASSLDGENTEVFF;TRA:CALGDRRGNTGKLIF
clone_221_seq_2	H11_clonotype1011	1	TRB:CASSLAGYNSPLYF;TRA:CAMRESDTNAYKVIF
clone_222_seq_2	H11_clonotype1012	1	TRB:CASSLDRGSYEQYF;TRA:CAMRENGASSSFSKLVF
clone_223_seq_2	H11_clonotype1013	1	TRB:CASSSGQGWDTQYF;TRA:CAMREGRGNNAGAKLTF
clone_224_seq_2	H11_clonotype1014	1	TRB:CASSLDRNQDTQYF;TRA:CAAYTNTGKLTF
clone_225_seq_2	H11_clonotype1015	1	TRB:CASSTGTGGYEQYF;TRA:CAASDYSNNRLTL
clone_226_seq_2	H11_clonotype1016	1	TRB:CASSLGGAHERLFF;TRA:CAASAQGGSAKLIF
clone_227_seq_2	H11_clonotype1018	1	TRB:CASSLRVSQNTLYF;TRA:CAATKPTGNTGKLIF
clone_228_seq_2	H11_clonotype1019	1	TRB:CASSFLGGRDEQYF;TRB:CASSLGQGGEQYF;TRA:CAASVNNAGAKLTF
clone_229_seq_2	H11_clonotype1020	1	TRB:CTCSADGGTEVFF;TRA:CAASEAGNTGKLIF
clone_230_seq_2	H11_clonotype1021	1	TRB:CASSLEGSSERLFF;TRA:CAASSGTQVVGQLTF
clone_231_seq_2	H11_clonotype1022	1	TRB:CASSPDWGVDTQYF;TRA:CAASPHDTNAYKVIF
clone_232_seq_2	H11_clonotype1023	1	TRB:CASSPGHLYAEQFF;TRA:CAARSASSGSWQLIF
clone_233_seq_2	H11_clonotype1024	1	TRB:CASSIPADTQYF;TRA:CALGNYGNEKITF
clone_234_seq_2	H11_clonotype1025	1	TRB:CASRQGTNERLFF
clone_235_seq_2	H11_clonotype1027	1	TRB:CASSPGGITEVFF
clone_236_seq_2	H11_clonotype1028	1	TRB:CASSIWGQDTQYF
clone_237_seq_2	H11_clonotype1029	1	TRB:CASIRDSGNTLYF
clone_238_seq_2	H11_clonotype1030	1	TRA:CVLGDHGNAGAKLTF
clone_239_seq_2	H11_clonotype1031	1	TRA:CALSDHGNNNAPRF
clone_240_seq_2	H11_clonotype1033	1	TRA:CAVSMRRGSALGRLHF
clone_241_seq_2	H11_clonotype1034	1	TRB:CASSQDLTGGGYAEQFF
clone_242_seq_2	H11_clonotype1035	1	TRB:CASSQEVTGGFTGQLYF
clone_243_seq_2	H11_clonotype1036	1	TRB:CASSQEVTGGFTGQLYF
clone_244_seq_2	H11_clonotype1037	1	TRB:CASSPRTGSNERLFF
clone_245_seq_2	H11_clonotype1038	1	TRB:CASSAGGWSAETLYF
clone_246_seq_2	H11_clonotype1039	1	TRB:CASSSGQGRNTEVFF
clone_247_seq_2	H11_clonotype1040	1	TRB:CASSSLGGFNQDTQYF
clone_248_seq_2	H11_clonotype1041	1	TRB:CASSNSGTGEYEQYF
clone_249_seq_2	H11_clonotype1042	1	TRB:CASSPRDWGGVGQYF
clone_250_seq_2	H11_clonotype1043	1	TRB:CASSLDNISNERLFF
clone_251_seq_2	H11_clonotype1044	1	TRB:CASSLGDINTGQLYF
clone_252_seq_2	H11_clonotype1045	1	TRB:CASRARGRGYAEQFF
clone_253_seq_2	H11_clonotype1046	1	TRB:CASSPMGQGRSEQYF
clone_254_seq_2	H11_clonotype1048	1	TRB:CASSPMGQGRSEQYF
clone_255_seq_2	H11_clonotype1049	1	TRB:CASSFGAANTGQLYF
clone_256_seq_2	H11_clonotype1050	1	TRB:CASSFGAANTGQLYF
clone_257_seq_2	H11_clonotype1051	1	TRB:CASSFYTISNERLFF
clone_258_seq_2	H11_clonotype1052	1	TRB:CASRKDWGGFYEQYF
clone_259_seq_2	H11_clonotype1054	1	TRB:CASSPRPDNNQAPLF
clone_260_seq_2	H11_clonotype1055	1	TRB:CASSSPGTGAYEQYF
clone_261_seq_2	H11_clonotype1056	1	TRB:CASSLDWGGAGEQYF
clone_262_seq_2	H11_clonotype1057	1	TRB:CASSLEPGGKNTLYF
clone_263_seq_2	H11_clonotype1058	1	TRB:CASSQPGLGDYAEQFF
clone_264_seq_2	H11_clonotype1059	1	TRB:CASSQASGQGYAEQFF
clone_265_seq_2	H11_clonotype1060	1	TRB:CASSHGQNSYNSPLYF
clone_266_seq_2	H11_clonotype1061	1	TRB:CASSQGLGVSAETLYF
clone_267_seq_2	H11_clonotype1062	1	TRB:CASSHPGTGGSYEQYF
clone_268_seq_2	H11_clonotype1063	1	TRB:CSSSQTGGFNERLFF
clone_269_seq_2	H11_clonotype1064	1	TRB:CSSSQGQGGNTEVFF
clone_270_seq_2	H11_clonotype1065	1	TRB:CTCSALRGSYEQYF
clone_271_seq_2	H11_clonotype1066	1	TRB:CTCSADRQNTEVFF
clone_272_seq_2	H11_clonotype1068	1	TRB:CTCSAGRGSSEVFF
clone_273_seq_2	H11_clonotype1069	1	TRB:CTCSAVGRDTEVFF
clone_274_seq_2	H11_clonotype1070	1	TRB:CTCSAGQGNAEQFF
clone_275_seq_2	H11_clonotype1071	1	TRB:CTCSGGTVYAEQFF
clone_276_seq_2	H11_clonotype1072	1	TRB:CASRRDSQNTLYF;TRA:CAFHTGNYKYVF
clone_277_seq_2	H11_clonotype1073	1	TRB:CASSSGTGGSYEQYF;TRA:CAARTGGYKVVF
clone_278_seq_2	H11_clonotype1074	1	TRB:CASSLLSGVQDTQYF;TRA:CAIHSNTNKVVF
clone_279_seq_2	H11_clonotype1076	1	TRB:CSSSQGTGSSYEQYF;TRA:CAADTNTGKLTF
clone_280_seq_2	H11_clonotype1077	1	TRB:CASSLVWTGVGQLYF;TRA:CAAAPNSGTYQRF
clone_281_seq_2	H11_clonotype1078	1	TRB:CASSLGGVSSYEQYF;TRA:CAADMSNYNVLYF
clone_282_seq_2	H11_clonotype1079	1	TRB:CTCSADARGAEQYF;TRA:CAANYAQGLTF
clone_283_seq_2	H11_clonotype1080	1	TRB:CASSMPGLGEVFF;TRA:CAIDPMSNYNVLYF
clone_284_seq_2	H11_clonotype1081	1	TRB:CASSQKWDGTSNERLFF;TRA:CAASDSNNRIFF;TRA:CALSDTNAYKVIF
clone_285_seq_2	H11_clonotype1082	1	TRB:CASSADWGGNYAEQFF;TRA:CALSESNNRIFF
clone_286_seq_2	H11_clonotype1083	1	TRB:CTCSAEISNERLFF;TRA:CAARGGGNTGKLIF;TRA:CAIAFTGSGGKLTL
clone_287_seq_2	H11_clonotype1084	1	TRB:CASGRDRDAEQFF;TRB:CTCSAGLNQDTQYF;TRA:CAMREGVGNNAPRF;TRA:CAVSMYAYKVIF
clone_288_seq_2	H11_clonotype1085	1	TRB:CTCSAVTNTGQLYF;TRA:CAAPSGGSNAKLTF
clone_289_seq_2	H11_clonotype1087	1	TRB:CASRQGTNERLFF;TRA:CAVEGVTGSGGKLTL
clone_290_seq_2	H11_clonotype1088	1	TRB:CASRDRYNSPLYF;TRA:CATEGQGGRALIF
clone_291_seq_2	H11_clonotype1089	1	TRB:CASSLKAANTGQLYF;TRA:CAADDSGYNKLTF
clone_292_seq_2	H11_clonotype1090	1	TRB:CASSLRLGSQNTLYF;TRA:CAPPHMGYKLTF;TRA:CAVSNSAGNKLTF
clone_293_seq_2	H11_clonotype1091	1	TRB:CASSLSQGNYAEQFF;TRA:CAASDTGNYKYVF
clone_294_seq_2	H11_clonotype1092	1	TRB:CASSPWGAIAETLYF;TRA:CAESSSNTNKVVF
clone_295_seq_2	H11_clonotype1093	1	TRB:CASSRDRSGTGQLYF;TRA:CAVRGNSNNRIFF
clone_296_seq_2	H11_clonotype1094	1	TRB:CASSPSGTGGFEQYF;TRA:CAVYSNYQLIW
clone_297_seq_2	H11_clonotype1095	1	TRB:CASSLSWGGQDTQYF;TRA:CAVRLALGRLHF
clone_298_seq_2	H11_clonotype1096	1	TRB:CASSQGLGGLQNTLYF;TRA:CAVSSDYANKMIF
clone_299_seq_2	H11_clonotype1098	1	TRB:CASSPTANSDYTF;TRA:CALSASGSWQLIF
clone_300_seq_2	H11_clonotype1099	1	TRB:CASSSTGGNYAEQFF;TRA:CVLGINSAGNKLTF
clone_301_seq_2	H11_clonotype1100	1	TRB:CASSLAGNSGNTLYF;TRA:CVLGDRTNTGKLTF
clone_302_seq_2	H11_clonotype1101	1	TRB:CASSFRQGSAETLYF;TRA:CALSIASSSFSKLVF;TRA:CAVNYNQGKLIF
clone_303_seq_2	H11_clonotype1102	1	TRB:CASSLAGTINTEVFF;TRA:CAASLTGNTGKLIF
clone_304_seq_2	H11_clonotype1103	1	TRB:CASSRRLGGNQDTQYF;TRA:CATDADYSNNRLTL
clone_305_seq_2	H11_clonotype1104	1	TRB:CASQNWGGQNSQNTLYF;TRB:CASTRDRADTGQLYF;TRA:CAITTSSGQKLVF
clone_306_seq_2	H11_clonotype1105	1	TRB:CASSRQGASNSDYTF;TRA:CAVSPDQGGRALIF;TRA:CAVSRTGGYKVVF
clone_307_seq_2	H11_clonotype1106	1	TRB:CASRARGRGYAEQFF;TRB:CASSGGFYEQYF;TRA:CAVDTNAYKVIF;TRA:CVLALNYNQGKLIF
clone_308_seq_2	H11_clonotype1107	1	TRB:CASRARGRGYAEQFF;TRA:CAVDTNAYKVIF
clone_309_seq_2	H11_clonotype1108	1	TRB:CASSFAGTTNTEVFF;TRA:CAVSANQGGRALIF
clone_310_seq_2	H11_clonotype1109	1	TRB:CASSSGDSNNQAPLF;TRA:CAVSSGSWQLIF
clone_311_seq_2	H11_clonotype1110	1	TRB:CASSSFLGLSAETLYF;TRA:CAVRVDSNYQLIW
clone_312_seq_2	H11_clonotype1111	1	TRB:CASSIRVQNTLYF;TRA:CAVSLNTGYQNFYF
clone_313_seq_2	H11_clonotype1112	1	TRB:CASSIGHYAEQFF;TRA:CAVSMNQGGSAKLIF
clone_314_seq_2	H11_clonotype1113	1	TRB:CASSMGQTYEQYF;TRA:CALSMNNYAQGLTF
clone_315_seq_2	H11_clonotype1114	1	TRB:CASSIGKNTEVFF;TRA:CAVSGSAGNKLTF
clone_316_seq_2	H11_clonotype1115	1	TRB:CASSQEWGGANTGQLYF;TRA:CVLSRGQGGRALIF
clone_317_seq_2	H11_clonotype1116	1	TRB:CASSLDMRGGNTLYF;TRA:CALRALANSGTYQRF
clone_318_seq_2	H11_clonotype1117	1	TRB:CASSLTGGSSYEQYF;TRA:CAASELNNAGAKLTF
clone_319_seq_2	H11_clonotype1118	1	TRB:CASSFLGGSQDTQYF;TRA:CAASTSNTNKVVF
clone_320_seq_2	H11_clonotype1119	1	TRB:CASSLAGQGRNTLYF;TRA:CAMRDTTASLGKLQF
clone_321_seq_2	H11_clonotype1123	1	TRB:CASSINKYAEQFF;TRA:CAASANTGNYKYVF
clone_322_seq_2	H11_clonotype1124	1	TRB:CASSITVQDTQYF;TRA:CAASGVTNTGKLTF
clone_323_seq_2	H11_clonotype1125	1	TRB:CASSIAGEDTQYF;TRA:CALLDTNAYKVIF
clone_324_seq_2	H11_clonotype1126	1	TRB:CASSLDRGFNERLFF;TRA:CAVSEGYSNNRLTL
clone_325_seq_2	H11_clonotype1127	1	TRB:CASSLELVSQNTLYF;TRA:CALAGTGGYKVVF
clone_326_seq_2	H11_clonotype1128	1	TRB:CASSLTGGSTGQLYF;TRA:CAATSGGSNAKLTF
clone_327_seq_2	H11_clonotype1129	1	TRB:CASGDATGGADYAEQFF;TRA:CALGEDYSNNRLTL
clone_328_seq_2	H11_clonotype1130	1	TRB:CSSRPYWGNQDTQYF;TRA:CALYNAGAKLTF
clone_329_seq_2	H11_clonotype1131	1	TRB:CTCSADRQNTEVFF;TRA:CALSGGSNNRIFF
clone_330_seq_2	H11_clonotype1132	1	TRB:CASRRDRGVSNERLFF;TRA:CVVGDRGSALGRLHF
clone_331_seq_2	H11_clonotype1133	1	TRB:CASSRHWGGSQNTLYF;TRA:CALGDNAGAKLTF
clone_332_seq_2	H11_clonotype1134	1	TRB:CASSFYRGRRYAEQFF;TRA:CAMREQGGSAKLIF
clone_333_seq_2	H11_clonotype1135	1	TRB:CASSRRPGMTNERLFF;TRB:CTCSGLLSQNTLYF;TRA:CALSEASGSWQLIF
clone_334_seq_2	H11_clonotype1136	1	TRB:CTCSGTAYNSPLYF;TRA:CALSEGGFASALTF
clone_335_seq_2	H11_clonotype1137	1	TRB:CASSQGQASNERLFF;TRA:CAMRGNTEGADRLTF
clone_336_seq_2	H11_clonotype1138	1	TRB:CASSPGTGSNERLFF;TRA:CALSDWGTGGYKVVF
clone_337_seq_2	H11_clonotype1139	1	TRB:CASSQGLGSSEEQYF;TRA:CALGDLGGSALGRLHF
clone_338_seq_2	H11_clonotype1142	1	TRB:CTCSADWKAERLFF;TRA:CAASPTGKLTF
clone_339_seq_2	H11_clonotype1143	1	TRB:CTCSGRDWRDTQYF;TRA:CAMREGGSNYNVLYF
clone_340_seq_2	H11_clonotype1144	1	TRB:CASRQGTNERLFF;TRA:CAMRGVSGGSNAKLTF
clone_341_seq_2	H11_clonotype1145	1	TRB:CASSLSGGNQDTQYF;TRA:CALGDHRGSALGRLHF
clone_342_seq_2	H11_clonotype1146	1	TRB:CASSMRENTEVFF;TRA:CAASEGNNRIFF
clone_343_seq_2	H11_clonotype1147	1	TRB:CASSRGRNSPLYF;TRA:CAASGANTGKLTF
clone_344_seq_2	H11_clonotype1148	1	TRB:CASSFWGGNTGQLYF;TRA:CAAGNGANTGKLTF
clone_345_seq_2	H11_clonotype1150	1	TRB:CASSLVGSSNERLFF;TRA:CAARSSNTNKVVF
clone_346_seq_2	H11_clonotype1152	1	TRB:CASSFGQGGDERLFF;TRA:CAASVGTGGYKVVF
clone_347_seq_2	H11_clonotype1153	1	TRB:CASSFPGTGVWEQYF;TRA:CAASAGSSGSWQLIF
clone_348_seq_2	H11_clonotype1154	1	TRB:CASSLRTASAETLYF;TRA:CAATSSSGSWQLIF
clone_349_seq_2	H11_clonotype1155	1	TRB:CASSPRDWGGYEQYF;TRA:CAASALWTQVVGQLTF
clone_350_seq_2	H11_clonotype1156	1	TRB:CASSDFDWGYNYAEQFF;TRA:CAARLMYRGSALGRLHF
clone_351_seq_2	H11_clonotype1157	1	TRB:CASSRQANSDYTF;TRA:CALRLNYNQGKLIF
clone_352_seq_2	H11_clonotype1158	1	TRB:CASSIQNYAEQFF;TRA:CALSLNTGANTGKLTF
clone_353_seq_2	H11_clonotype1159	1	TRB:CASSIHRVGNTLYF
clone_354_seq_2	H11_clonotype1160	1	TRB:CASSIRRSGNTLYF
clone_355_seq_2	H11_clonotype1161	1	TRB:CASSIEGNNERLFF
clone_356_seq_2	H11_clonotype1162	1	TRB:CASSLQGNQDTQYF
clone_357_seq_2	H11_clonotype1163	1	TRB:CASSADRENAEQFF
clone_358_seq_2	H11_clonotype1164	1	TRA:CAVSLASSSFSKLVF
clone_359_seq_2	H11_clonotype1165	1	TRA:CAASGMNYNQGKLIF
clone_360_seq_2	H11_clonotype1166	1	TRA:CALVRSSNTNKVVF
clone_361_seq_2	H11_clonotype1167	1	TRB:CASSQEGGGQGSNERLFF
clone_362_seq_2	H11_clonotype1168	1	TRA:CALSELDMGYKLTF
clone_363_seq_2	H11_clonotype1169	1	TRA:CALTRNNYAQGLTF
clone_364_seq_2	H11_clonotype1170	1	TRA:CALRANSAGNKLTF
clone_365_seq_2	H11_clonotype1171	1	TRB:CASSFGQGRDAETLYF
clone_366_seq_2	H11_clonotype1174	1	TRB:CASSLETRGSNERLFF
clone_367_seq_2	H11_clonotype1177	1	TRB:CTCSAPGQGNERLFF
clone_368_seq_2	H11_clonotype1178	1	TRB:CTCSAPGQGNERLFF
clone_369_seq_2	H11_clonotype1180	1	TRB:CTCSAEQINQDTQYF
clone_370_seq_2	H11_clonotype1181	1	TRB:CTCSADLTTNTEVFF
clone_371_seq_2	H11_clonotype1182	1	TRB:CTCSADRGAGAEQFF
clone_372_seq_2	H11_clonotype1183	1	TRB:CTCSADRLGGDTQYF
clone_373_seq_2	H11_clonotype1184	1	TRB:CTCSADGGLYAEQFF
clone_374_seq_2	H11_clonotype1186	1	TRB:CTCSALGGRSYEQYF
clone_375_seq_2	H11_clonotype1187	1	TRB:CTCSALGGRSYEQYF
clone_376_seq_2	H11_clonotype1188	1	TRB:CTCSALGGRSYEQYF
clone_377_seq_2	H11_clonotype1190	1	TRB:CTCSAVDRANERLFF
clone_378_seq_2	H11_clonotype1191	1	TRB:CASSIAGGADTQYF;TRA:CAASAGGTGSNRLTF;TRA:CAIYNQGKLIF
clone_379_seq_2	H11_clonotype1192	1	TRB:CASSLEDWGIQDTQYF;TRA:CTPLNYNQGKLIF
clone_380_seq_2	H11_clonotype1195	1	TRB:CASSQPGLGGDQDTQYF;TRA:CILRVYGGNNKLTF
clone_381_seq_2	H11_clonotype1196	1	TRB:CASGDAEGNSDYTF;TRB:CASSINGDSYEQYF;TRA:CAADDTNAYKVIF
clone_382_seq_2	H11_clonotype1197	1	TRB:CASSLAGGYNQDTQYF;TRA:CAIYQGGSAKLIF
clone_383_seq_2	H11_clonotype1198	1	TRB:CASSIRTGKDTQYF;TRA:CAARRSNNRIFF;TRA:CAILLNAYKVIF
clone_384_seq_2	H11_clonotype1199	1	TRB:CASSIRGGEYEQYF;TRA:CAVNQGGRALIF
clone_385_seq_2	H11_clonotype1201	1	TRB:CASSPRLGASAETLYF;TRA:CATVEGADRLTF
clone_386_seq_2	H11_clonotype1202	1	TRB:CASSITDSGNTLYF;TRA:CAASAYSGTYQRF;TRA:CAPDTNAYKVIF
clone_387_seq_2	H11_clonotype1203	1	TRB:CASSIAGSQDTQYF;TRA:CALERSNYNQGKLIF
clone_388_seq_2	H11_clonotype1204	1	TRB:CASSIRTGGIEQYF;TRA:CALSGTNKVVF
clone_389_seq_2	H11_clonotype1205	1	TRB:CASGAPLWDYAEQFF;TRB:CASSGDRDLYEQYF;TRA:CAVKSSGSWQLIF
clone_390_seq_2	H11_clonotype1206	1	TRB:CASSLMAGGGGTEVFF;TRA:CALGERGRIFF
clone_391_seq_2	H11_clonotype1207	1	TRB:CASRGQPSAETLYF;TRA:CAMERGSGGSNYKLTF
clone_392_seq_2	H11_clonotype1208	1	TRB:CASSIRDNYAEQFF;TRA:CAHYNQGKLIF
clone_393_seq_2	H11_clonotype1209	1	TRB:CASSMKGAGNTLYF;TRA:CALSENNAGAKLTF
clone_394_seq_2	H11_clonotype1210	1	TRB:CASSPYRLSYNSPLYF;TRA:CAASGVDSNYQLIW
clone_395_seq_2	H11_clonotype1211	1	TRB:CASSLSWGASAETLYF;TRA:CVLSLNSNNRIFF
clone_396_seq_2	H11_clonotype1213	1	TRB:CTCSADGGLYAEQFF;TRA:CALRAGGSNAKLTF
clone_397_seq_2	H11_clonotype1214	1	TRB:CTCSAGLADTGQLYF;TRA:CAAGEVITGNTGKLIF
clone_398_seq_2	H11_clonotype1215	1	TRB:CASSIEHSNTEVFF;TRA:CALSPGSALGRLHF
clone_399_seq_2	H11_clonotype1216	1	TRB:CASSAGTGGLSNERLFF;TRA:CAVSRGGNMGYKLTF
clone_400_seq_2	H11_clonotype1217	1	TRB:CTCSAGNRVGTEVFF;TRA:CAASRVSSGSWQLIF
clone_401_seq_2	H11_clonotype1218	1	TRB:CASSMEYSGNTLYF;TRA:CAASHNNAGAKLTF
clone_402_seq_2	H11_clonotype1219	1	TRB:CASSPDWGANTGQLYF;TRA:CALGDPSGSWQLIF
clone_403_seq_2	H11_clonotype1220	1	TRB:CASSRLGGRDAETLYF;TRA:CAASLRNSNNRIFF
clone_404_seq_2	H11_clonotype1221	1	TRB:CSSSQSAGGGGSDYTF;TRA:CAVSGYQGGRALIF
clone_405_seq_2	H11_clonotype1222	1	TRB:CTCSADGGLYAEQFF;TRA:CALGHTEGADRLTF
clone_406_seq_2	H11_clonotype1223	1	TRB:CTCSAATGEGERLFF;TRA:CALSGTSSGQKLVF
clone_407_seq_2	H11_clonotype1224	1	TRB:CASSPLRGASQNTLYF;TRA:CALGDQGGNTGKLIF
clone_408_seq_2	H11_clonotype1225	1	TRB:CTCRLGQGGGTEVFF;TRA:CAASLITGNTGKLIF
clone_409_seq_2	H11_clonotype1226	1	TRB:CTCSADQGARAEQFF;TRA:CALRALNTGNYKYVF
clone_410_seq_2	H11_clonotype1229	1	TRB:CTCSAAPTGGNTLYF;TRA:CALGDRAGANTGKLTF
clone_411_seq_2	H11_clonotype1230	1	TRB:CASNAGTGADEQYF;TRA:CALGDLNYNQGKLIF
clone_412_seq_2	H11_clonotype1231	1	TRB:CASRRDWGEGQNTLYF;TRA:CAMREDDSGYNKLTF
clone_413_seq_2	H11_clonotype1232	1	TRB:CASSLSGGARYAEQFF;TRA:CAMREGLTGGYKVVF
clone_414_seq_2	H11_clonotype1233	1	TRB:CTCSAQGYNNQAPLF;TRA:CAMREGNYNQGKLIF
clone_415_seq_2	H11_clonotype1234	1	TRB:CASSLVQGARGNTLYF;TRA:CAASAGGGRALIF
clone_416_seq_2	H11_clonotype1235	1	TRB:CTCSANSNNYAEQFF;TRA:CAASTNSNNRIFF
clone_417_seq_2	H11_clonotype1236	1	TRB:CSSSQSGRGPNERLFF;TRA:CAASDPSGSWQLIF
clone_418_seq_2	H11_clonotype1237	1	TRB:CASSLIPVISNERLFF;TRA:CALRNNNNAPRF
clone_419_seq_2	H11_clonotype1238	1	TRB:CASSIGDWGYEQYF;TRA:CALSDPTGGNNKLTF
clone_420_seq_2	H11_clonotype1239	1	TRB:CASSIAQGYTEVFF;TRA:CALSDPSGGSNYKLTF
clone_421_seq_2	H11_clonotype1240	1	TRB:CASSIPWASAETLYF
clone_422_seq_2	H11_clonotype1242	1	TRA:CALSFFNTGNYKYVF
clone_423_seq_2	H11_clonotype1243	1	TRA:CALSFFNTGNYKYVF
clone_424_seq_2	H11_clonotype1245	1	TRA:CAMREGWDSNYQLIW
clone_425_seq_2	H11_clonotype1246	1	TRA:CAMREGWDSNYQLIW
clone_426_seq_2	H11_clonotype1247	1	TRB:CASSLRGLGYNYAEQFF
clone_427_seq_2	H11_clonotype1250	1	TRB:CASSLWGQSSSAETLYF
clone_428_seq_2	H11_clonotype1252	1	TRB:CTCSAGTGRSSYEQYF
clone_429_seq_2	H11_clonotype1254	1	TRB:CASSIPDGKNTEVFF;TRA:CAARGTGNTGKLIF
clone_430_seq_2	H11_clonotype1255	1	TRB:CASSIWGASSYEQYF;TRA:CALDNNNNAPRF
clone_431_seq_2	H11_clonotype1256	1	TRB:CASSIPTISQNTLYF;TRA:CAMVASSGSWQLIF
clone_432_seq_2	H11_clonotype1258	1	TRB:CASSIAGENTGQLYF;TRA:CALSGASGSFNKLTF
clone_433_seq_2	H11_clonotype1259	1	TRB:CASSPGGLSNERLFF;TRA:CAARDSGYNKLTF
clone_434_seq_2	H11_clonotype1260	1	TRB:CASSPGTTSAETLYF;TRA:CAVSVAGTGSNRLTF
clone_435_seq_2	H11_clonotype1261	1	TRB:CASSLGLGGRNTGQLYF;TRA:CAVRVDYANKMIF
clone_436_seq_2	H11_clonotype1262	1	TRB:CASTSPQVSSYEQYF;TRA:CAASTGANTGKLTF
clone_437_seq_2	H11_clonotype1264	1	TRB:CTCSADPRLGVYEQYF;TRA:CALRATASLGKLQF
clone_438_seq_2	H11_clonotype1265	1	TRB:CASSIRPIYNSPLYF;TRA:CAMSNRNSNNRIFF
clone_439_seq_2	H11_clonotype1266	1	TRB:CTCSADSTYYNSPLYF;TRA:CAVGAMNYNQGKLIF
clone_440_seq_2	H11_clonotype1268	1	TRB:CASSIEGGSAETLYF;TRA:CAMREGDNYAQGLTF
clone_441_seq_2	H11_clonotype1269	1	TRB:CASSRPGQGGERLFF;TRA:CAARNYNQGKLIF
clone_442_seq_2	H11_clonotype1270	1	TRB:CTCSADGWGAYAEQFF;TRA:CAASAGSNNRIFF
clone_443_seq_2	H11_clonotype1271	1	TRB:CASSLDGRGLANSDYTF;TRA:CALSDTNKVVF
clone_444_seq_2	H11_clonotype1272	1	TRB:CASSLNWGGADQNTLYF;TRA:CAARLNTGGLSGKLTF
clone_445_seq_2	H11_clonotype1273	1	TRB:CASSKRQGNYAEQFF;TRA:CALSANYGNEKITF
clone_446_seq_2	H11_clonotype1274	1	TRB:CASSLGWGGLGQDTQYF;TRA:CALSDQGQGGSAKLIF
clone_447_seq_2	H11_clonotype1275	1	TRA:CAMREGWDSNYQLIW
clone_448_seq_2	H11_clonotype1276	1	TRA:CAMREGWDSNYQLIW
clone_449_seq_2	H11_clonotype1277	1	TRA:CAMREGWDSNYQLIW
clone_450_seq_2	H11_clonotype1278	1	TRA:CAMREGWDSNYQLIW
clone_451_seq_2	H11_clonotype1280	1	TRB:CASGEEQYF
clone_452_seq_2	H11_clonotype1281	1	TRB:CTCSAGTGGFYNSPLYF;TRA:CAVPWGRALIF
clone_453_seq_2	H11_clonotype1282	1	TRB:CTCSSPLTGASAETLYF;TRA:CAMERGSAGNKLTF
clone_454_seq_2	H11_clonotype1283	1	TRB:CASSIPQGATTGQLYF;TRA:CVLSALENYAQGLTF
clone_455_seq_2	H11_clonotype1284	1	TRB:CTCSADRGLGELDEQYF;TRA:CALAPSNTNKVVF
clone_456_seq_2	H11_clonotype1285	1	TRB:CTCSADLRDWGAETLYF;TRA:CAASIGTNAYKVIF
clone_457_seq_2	H11_clonotype1286	1	TRB:CASSRTGGPSQNTLYF;TRA:CALNTGGLSGKLTF
clone_458_seq_2	H11_clonotype1287	1	TRA:CAASPNYNVLYF
clone_459_seq_2	H11_clonotype1288	1	TRA:CAASTNYNVLYF
clone_460_seq_2	H11_clonotype1289	1	TRB:CASGDVGTAETLYF
clone_461_seq_2	H11_clonotype1290	1	TRB:CASGDVGTAETLYF
clone_462_seq_2	H11_clonotype1291	1	TRB:CASGEDTQYF;TRA:CALGNTGNYKYVF
clone_463_seq_2	H11_clonotype1292	1	TRB:CASGDERLFF;TRA:CAAEAVGDNSKLIW
clone_464_seq_2	H11_clonotype1293	1	TRB:CASSILPGLGFAETLYF;TRA:CAVQNYNQGKLIF
clone_465_seq_2	H11_clonotype1294	1	TRB:CASGDLGGYAEQFF;TRA:CAVRDYNVGDNSKLIW
clone_466_seq_2	H11_clonotype1295	1	TRB:CASGDVGTAETLYF;TRA:CAAYVTGSGGKLTL
clone_467_seq_2	H11_clonotype1296	1	TRB:CASSLGGQYF;TRA:CAMREGAGANTGKLTF
clone_468_seq_2	H11_clonotype1297	1	TRA:CAVNNAGAKLTF
clone_469_seq_2	H11_clonotype1298	1	TRA:CAASDTNAYKVIF
clone_470_seq_2	H11_clonotype1299	1	TRB:CASGNDTEVFF
clone_471_seq_2	H11_clonotype1300	1	TRB:CASSPNTEVFF
clone_472_seq_2	H11_clonotype1301	1	TRB:CASSRGSEVFF
clone_473_seq_2	H11_clonotype1303	1	TRB:CASGDIYEQYF;TRA:CILRVNTEGADRLTF
clone_474_seq_2	H11_clonotype1304	1	TRB:CASTGGTEVFF;TRA:CALSPSNTNKVVF
clone_475_seq_2	H11_clonotype1306	1	TRB:CASGDVYEQYF;TRA:CALSPPSGSWQLIF
clone_476_seq_2	H11_clonotype1307	1	TRB:CASSLDQAPLF;TRA:CAVSPTSGGNYKPTF
clone_477_seq_2	H11_clonotype1308	1	TRB:CASSLGDTLYF;TRA:CAVRDTGANTGKLTF
clone_478_seq_2	H11_clonotype1309	1	TRB:CASGEIYEQYF;TRA:CALSRNNYAQGLTF
clone_479_seq_2	H11_clonotype1310	1	TRB:CASGETGGARDTQYF;TRA:CAAKAASLGKLQF
clone_480_seq_2	H11_clonotype1311	1	TRB:CASSINSDYTF;TRA:CAASVSGSWQLIF
clone_481_seq_2	H11_clonotype1313	1	TRB:CASGDSEDTQYF
clone_482_seq_2	H11_clonotype1314	1	TRB:CASGVQGYEQYF
clone_483_seq_2	H11_clonotype1315	1	TRB:CASSPTKNTLYF
clone_484_seq_2	H11_clonotype1316	1	TRB:CASSPTKNTLYF
clone_485_seq_2	H11_clonotype1318	1	TRB:CASSLWGGEQYF
clone_486_seq_2	H11_clonotype1320	1	TRB:CASGDGDYEQYF;TRA:CALERQGGRALIF;TRA:CAMREGISSGSWQLIF
clone_487_seq_2	H11_clonotype1321	1	TRB:CASGARNSPLYF;TRA:CARPSNNRIFF
clone_488_seq_2	H11_clonotype1322	1	TRB:CASGTGGFEQYF;TRA:CAAEAFSNYNVLYF;TRA:CAMERDYAQGLTF
clone_489_seq_2	H11_clonotype1323	1	TRB:CASSLGTGQLYF;TRA:CAIGRNSNNRIFF
clone_490_seq_2	H11_clonotype1324	1	TRB:CASGDWDYEQYF;TRA:CAASAGNTGKLIF;TRA:CAIDPAGSGGKLTL
clone_491_seq_2	H11_clonotype1325	1	TRB:CASGDAGYEQYF;TRA:CAIDLTGSGGKLTL
clone_492_seq_2	H11_clonotype1326	1	TRB:CASGDANTEVFF;TRA:CAVSMNTGNYKYVF
clone_493_seq_2	H11_clonotype1329	1	TRB:CASGEAGNTLYF;TRA:CVLSPPGNTGKLIF
clone_494_seq_2	H11_clonotype1330	1	TRB:CASSESQNTLYF;TRA:CAMERSGSWQLIF
clone_495_seq_2	H11_clonotype1331	1	TRB:CASSLAGREQYF;TRA:CALGPITGNTGKLIF;TRA:CALWERGSGGSNAKLTF
clone_496_seq_2	H11_clonotype1332	1	TRB:CASSTSQNTLYF;TRA:CALGENYAQGLTF
clone_497_seq_2	H11_clonotype1333	1	TRB:CASSSNTGQLYF;TRA:CAASASSGSWQLIF
clone_498_seq_2	H11_clonotype1334	1	TRB:CASGKGVYEQYF;TRA:CAASSGGSNYKLTF
clone_499_seq_2	H11_clonotype1335	1	TRA:CAARPDYSNNRLTL
clone_500_seq_2	H11_clonotype1336	1	TRA:CAASRDTNAYKVIF
clone_501_seq_2	H11_clonotype1337	1	TRA:CAASMQQGTGSKLSF
clone_502_seq_2	H11_clonotype1338	1	TRB:CASDPGQNQAPLF
clone_503_seq_2	H11_clonotype1339	1	TRB:CASDPGQNQAPLF
clone_504_seq_2	H11_clonotype1340	1	TRB:CASDPGQNQAPLF
clone_505_seq_2	H11_clonotype1341	1	TRB:CASGWDSQDTQYF
clone_506_seq_2	H11_clonotype1342	1	TRB:CASGRHNYAEQFF
clone_507_seq_2	H11_clonotype1344	1	TRB:CASSLDWGVEQYF
clone_508_seq_2	H11_clonotype1345	1	TRB:CASSATGAYEQYF
clone_509_seq_2	H11_clonotype1346	1	TRB:CASSPSYNSPLYF
clone_510_seq_2	H11_clonotype1348	1	TRB:CASSLGGGDEQYF
clone_511_seq_2	H11_clonotype1350	1	TRB:CASGTGRTERLFF;TRA:CAFNVGDNSKLIW
clone_512_seq_2	H11_clonotype1351	1	TRB:CASSPGHYAEQFF;TRA:CASHTEGADRLTF
clone_513_seq_2	H11_clonotype1352	1	TRB:CASSLGGEDTQYF;TRA:CILRVSGAGYQNFYF
clone_514_seq_2	H11_clonotype1353	1	TRB:CASGRDRDAEQFF;TRA:CAVSMYAYKVIF
clone_515_seq_2	H11_clonotype1354	1	TRB:CASSQDGQNTLYF;TRA:CAVSMMGYKLTF
clone_516_seq_2	H11_clonotype1355	1	TRB:CASSRDNYAEQFF;TRA:CALELGNAGAKLTF
clone_517_seq_2	H11_clonotype1356	1	TRB:CASSLGGGSDYTF;TRA:CASDTNAYKVIF
clone_518_seq_2	H11_clonotype1357	1	TRB:CASGVKYNSPLYF;TRA:CAVFSGGNYKPTF
clone_519_seq_2	H11_clonotype1358	1	TRB:CASGEGGQNTLYF;TRA:CASSNTNKVVF
clone_520_seq_2	H11_clonotype1360	1	TRB:CASSPTGYSDYTF;TRA:CAASTGGSNAKLTF
clone_521_seq_2	H11_clonotype1361	1	TRB:CASGDAGGDEQYF;TRA:CALWDSNYQLIW
clone_522_seq_2	H11_clonotype1362	1	TRB:CASGDKGSYEQYF;TRA:CAVGITGNTGKLIF
clone_523_seq_2	H11_clonotype1363	1	TRB:CASGATGDSDYTF;TRA:CAVSDYGSSGNKLIF
clone_524_seq_2	H11_clonotype1364	1	TRB:CASSLDNTGQLYF;TRA:CALSTEGADRLTF
clone_525_seq_2	H11_clonotype1365	1	TRB:CASSLGQGAEQFF;TRA:CAVSPRDYANKMIF
clone_526_seq_2	H11_clonotype1366	1	TRB:CASGDWGNAEQFF;TRA:CVVGNRGSALGRLHF
clone_527_seq_2	H11_clonotype1367	1	TRB:CASGQGAGNTLYF;TRA:CAMREGETSSFSKLVF
clone_528_seq_2	H11_clonotype1369	1	TRB:CASSLDNNSPLYF;TRA:CAASRWSNNRIFF
clone_529_seq_2	H11_clonotype1372	1	TRB:CASGDRGVPGQLYF
clone_530_seq_2	H11_clonotype1373	1	TRB:CASGESGGGTEVFF
clone_531_seq_2	H11_clonotype1374	1	TRB:CASGDRGGQDTQYF
clone_532_seq_2	H11_clonotype1375	1	TRB:CASGEPGDQDTQYF
clone_533_seq_2	H11_clonotype1376	1	TRB:CASGEPGDQDTQYF
clone_534_seq_2	H11_clonotype1377	1	TRB:CASGDADWGGEQYF
clone_535_seq_2	H11_clonotype1378	1	TRB:CASGDAAVNTEVFF
clone_536_seq_2	H11_clonotype1380	1	TRB:CASGDAGGGHTLYF
clone_537_seq_2	H11_clonotype1381	1	TRB:CASGDLKGAETLYF
clone_538_seq_2	H11_clonotype1382	1	TRB:CASGGGGQNTEVFF
clone_539_seq_2	H11_clonotype1384	1	TRB:CASGGRENTGQLYF
clone_540_seq_2	H11_clonotype1387	1	TRB:CASSLGGANSDYTF
clone_541_seq_2	H11_clonotype1388	1	TRB:CASSLGGSAETLYF
clone_542_seq_2	H11_clonotype1389	1	TRB:CASSLGTASYEQYF
clone_543_seq_2	H11_clonotype1390	1	TRB:CASSPTGANTEVFF
clone_544_seq_2	H11_clonotype1391	1	TRB:CASSRGQDNTEVFF
clone_545_seq_2	H11_clonotype1392	1	TRB:CASSLQGDQDTQYF
clone_546_seq_2	H11_clonotype1393	1	TRB:CASSLDWGQNTLYF
clone_547_seq_2	H11_clonotype1394	1	TRB:CASSGDWGEDTQYF
clone_548_seq_2	H11_clonotype1395	1	TRB:CASGGDRTNERLFF;TRA:CAMLQGGRALIF
clone_549_seq_2	H11_clonotype1396	1	TRB:CASSLTGGNSDYTF;TRA:CAAASGSWQLIF
clone_550_seq_2	H11_clonotype1397	1	TRB:CASSFGGYQDTQYF;TRA:CAMMDSNYQLIW
clone_551_seq_2	H11_clonotype1398	1	TRB:CASGPGSYNSPLYF;TRA:CAFNVGDNSKLIW
clone_552_seq_2	H11_clonotype1399	1	TRB:CASGEGDSGNTLYF;TRA:CAAATSSGQKLVF
clone_553_seq_2	H11_clonotype1400	1	TRB:CASGDTGQGYEQYF;TRA:CALERNAGAKLTF
clone_554_seq_2	H11_clonotype1401	1	TRB:CASGDRGSAETLYF;TRA:CAVDTNKVVF
clone_555_seq_2	H11_clonotype1402	1	TRB:CASGDIGGQDTQYF;TRA:CAVSESYQLIW
clone_556_seq_2	H11_clonotype1403	1	TRB:CASGDAGVGTEVFF;TRA:CALERNAGAKLTF
clone_557_seq_2	H11_clonotype1404	1	TRB:CASGDAWGQNTLYF;TRA:CAMGGANTGKLTF
clone_558_seq_2	H11_clonotype1405	1	TRB:CASGDAGGAIEQYF;TRA:CALERNAGAKLTF;TRA:CATFNSGGSNAKLTF
clone_559_seq_2	H11_clonotype1406	1	TRB:CASSLEGVSYEQYF;TRA:CILRAIQGGSAKLIF
clone_560_seq_2	H11_clonotype1407	1	TRB:CASSPGQGNERLFF;TRA:CAVRSNNRIFF
clone_561_seq_2	H11_clonotype1408	1	TRB:CASGDGGAGNTLYF;TRA:CATDNAGAKLTF
clone_562_seq_2	H11_clonotype1409	1	TRB:CASGDASYNSPLYF;TRA:CAAGYTEGADRLTF
clone_563_seq_2	H11_clonotype1410	1	TRB:CASSPGWGSAEQFF;TRA:CAVRNSNNRIFF;TRA:CAVSMNYNQGKLIF
clone_564_seq_2	H11_clonotype1411	1	TRB:CASGETGTGDTQYF;TRA:CAASTGSGGKLTL
clone_565_seq_2	H11_clonotype1412	1	TRB:CASGDKGGNTEVFF;TRA:CAASTNSGTYQRF
clone_566_seq_2	H11_clonotype1413	1	TRB:CASSLQISNERLFF;TRA:CAAGPFAGAKLTF;TRA:CVLSGPNTNKVVF
clone_567_seq_2	H11_clonotype1414	1	TRB:CASSLRQGRGEQYF;TRA:CATTTASLGKLQF
clone_568_seq_2	H11_clonotype1416	1	TRB:CASGEGTKNSDYTF;TRA:CALPRGSALGRLHF
clone_569_seq_2	H11_clonotype1417	1	TRB:CASGDAGQGDTQYF;TRA:CAASLNTNTGKLTF
clone_570_seq_2	H11_clonotype1418	1	TRB:CASGGRGLNSPLYF;TRA:CAVALSNYNVLYF
clone_571_seq_2	H11_clonotype1419	1	TRB:CASSPQGFNERLFF;TRA:CAVITGNTGKLIF
clone_572_seq_2	H11_clonotype142	1	TRB:CASSLDRGPSDYTF;TRA:CAAETNSAGNKLTF;TRA:CAASARDTNAYKVIF
clone_573_seq_2	H11_clonotype1420	1	TRB:CASSLGGSNERLFF;TRA:CALSGATNAYKVIF;TRA:CAMRETGSGGKLTL
clone_574_seq_2	H11_clonotype1421	1	TRB:CASSLGTGNSPLYF;TRA:CALRRNSNNRIFF
clone_575_seq_2	H11_clonotype1422	1	TRB:CASSPRTGSDTQYF;TRA:CVLSGDYNQGKLIF
clone_576_seq_2	H11_clonotype1423	1	TRB:CASSLGLGENTLYF;TRA:CAVRIASSSFSKLVF
clone_577_seq_2	H11_clonotype1424	1	TRB:CASSLGQNTGQLYF;TRA:CAVIPGTQVVGQLTF
clone_578_seq_2	H11_clonotype1425	1	TRB:CASGETGGGNTLYF;TRA:CALRGGNTGKLIF
clone_579_seq_2	H11_clonotype1426	1	TRB:CASGDLGGYAEQFF;TRA:CAVRDYNVGDNSKLIW
clone_580_seq_2	H11_clonotype1427	1	TRB:CASSLAVGQNTLYF;TRA:CALGDSSGSWQLIF
clone_581_seq_2	H11_clonotype1428	1	TRB:CASSLEKDWGEQYF;TRA:CALGEKGSFNKLTF
clone_582_seq_2	H11_clonotype1429	1	TRB:CASGDPGGAFEQYF;TRA:CALSDWTNAYKVIF
clone_583_seq_2	H11_clonotype1430	1	TRB:CASGDAQGQNTLYF;TRA:CALSVNSAGNKLTF
clone_584_seq_2	H11_clonotype1431	1	TRB:CASGDGTGKNTLYF;TRA:CVVGDRGSALGRLHF
clone_585_seq_2	H11_clonotype1433	1	TRB:CASAPKGSGNTLYF;TRA:CALEGSPGGSNAKLTF
clone_586_seq_2	H11_clonotype1434	1	TRB:CASSQDWEQNTLYF;TRA:CALSLNVGDNSKLIW
clone_587_seq_2	H11_clonotype1435	1	TRB:CASSPGHSGNTLYF;TRA:CALSGYGSSGNKLIF
clone_588_seq_2	H11_clonotype1436	1	TRB:CASSLQGRDSDYTF;TRA:CALSDSSGSWQLIF
clone_589_seq_2	H11_clonotype1437	1	TRB:CASSQDWGVYEQYF;TRA:CAMRGNGGSNYKLTF
clone_590_seq_2	H11_clonotype1438	1	TRB:CASSLRGEEDTQYF;TRA:CAMRELNTGYQNFYF
clone_591_seq_2	H11_clonotype1439	1	TRB:CASSLVQTNTEVFF;TRA:CAASANSGTYQRF;TRA:CASPTTSSGQKLVF
clone_592_seq_2	H11_clonotype1440	1	TRB:CASSLDRGGDTQYF;TRA:CAAHMDYANKMIF
clone_593_seq_2	H11_clonotype1441	1	TRB:CASLQGANTGQLYF;TRA:CAARGNSNNRIFF
clone_594_seq_2	H11_clonotype1442	1	TRB:CASGDAGGKDEQYF;TRA:CAASDTNAYKVIF
clone_595_seq_2	H11_clonotype1444	1	TRB:CASGGTTDNERLFF;TRA:CAARDTGNYKYVF
clone_596_seq_2	H11_clonotype1445	1	TRB:CASSLKGDGNTLYF;TRA:CAASANSGTYQRF
clone_597_seq_2	H11_clonotype1446	1	TRB:CASSLGTSAETLYF;TRA:CAASRNSNNRIFF
clone_598_seq_2	H11_clonotype1447	1	TRB:CASGSGTGDTGQLYF
clone_599_seq_2	H11_clonotype1448	1	TRB:CASGEGGANTGQLYF
clone_600_seq_2	H11_clonotype1449	1	TRB:CASGEGGANTGQLYF
clone_601_seq_2	H11_clonotype1450	1	TRB:CASGDARAYNSPLYF
clone_602_seq_2	H11_clonotype1451	1	TRB:CASGDARAYNSPLYF
clone_603_seq_2	H11_clonotype1452	1	TRB:CASGDAGTGGYEQYF
clone_604_seq_2	H11_clonotype1453	1	TRB:CASGDAKGPNSDYTF
clone_605_seq_2	H11_clonotype1454	1	TRB:CASGARLGNSYEQYF
clone_606_seq_2	H11_clonotype1455	1	TRB:CASSPDWASQNTLYF
clone_607_seq_2	H11_clonotype1457	1	TRB:CASSRDRSNTGQLYF
clone_608_seq_2	H11_clonotype1458	1	TRB:CASSPLRNSGNTLYF
clone_609_seq_2	H11_clonotype1459	1	TRB:CASSPGTGGVYEQYF
clone_610_seq_2	H11_clonotype1460	1	TRB:CASSLSGDGAETLYF
clone_611_seq_2	H11_clonotype1461	1	TRB:CASGGSGGSSYEQYF;TRA:CAIDSNYQLIW
clone_612_seq_2	H11_clonotype1462	1	TRB:CASGDIAINQDTQYF;TRA:CAAVTGGYKVVF
clone_613_seq_2	H11_clonotype1463	1	TRB:CASGDADKSNSDYTF;TRA:CAAGDSNYQLIW
clone_614_seq_2	H11_clonotype1464	1	TRB:CASGGDWGSQNTLYF;TRA:CAIDPYANKMIF
clone_615_seq_2	H11_clonotype1465	1	TRB:CASSPGGTSAETLYF;TRA:CAAEGSNYQLIW
clone_616_seq_2	H11_clonotype1466	1	TRB:CASGDPGGNYAEQFF;TRA:CALERNAGAKLTF
clone_617_seq_2	H11_clonotype1467	1	TRB:CASGDPGGQGDTQYF;TRA:CALERNAGAKLTF
clone_618_seq_2	H11_clonotype1468	1	TRB:CASGGRGGRFYEQYF;TRA:CATDSNYQLIW
clone_619_seq_2	H11_clonotype1469	1	TRB:CASSDRQGSGNTLYF;TRA:CATDSGTYQRF
clone_620_seq_2	H11_clonotype1470	1	TRB:CASGTSGTGGYEQYF;TRA:CAANTNTGKLTF
clone_621_seq_2	H11_clonotype1471	1	TRB:CASSLRDWGGDTQYF;TRA:CAIVRPSSFSKLVF
clone_622_seq_2	H11_clonotype1472	1	TRB:CASSLVGGSNSDYTF;TRA:CAVSRGGRALIF
clone_623_seq_2	H11_clonotype1473	1	TRB:CASGDAGDRGYEQYF;TRA:CAASMRVYAQGLTF;TRA:CALKSNNRIFF
clone_624_seq_2	H11_clonotype1474	1	TRB:CASGAPGQGNERLFF;TRA:CAVSMTSGTYQRF
clone_625_seq_2	H11_clonotype1475	1	TRB:CASGARTGGDSDYTF;TRA:CAVSTYQGGRALIF
clone_626_seq_2	H11_clonotype1476	1	TRB:CASSPFRDNQDTQYF;TRA:CAMRVDTGYQNFYF
clone_627_seq_2	H11_clonotype1477	1	TRB:CASGDARGYNSPLYF;TRA:CAASGTGGLSGKLTF
clone_628_seq_2	H11_clonotype1478	1	TRB:CASSSRTGGAETLYF;TRA:CAVSPSSGSWQLIF
clone_629_seq_2	H11_clonotype1479	1	TRB:CASSLKGQGSSDYTF;TRA:CAVLQQGTGSKLSF
clone_630_seq_2	H11_clonotype1480	1	TRB:CASSGTGVGNSPLYF;TRA:CAVSARDTNAYKVIF
clone_631_seq_2	H11_clonotype1481	1	TRB:CASSRDWGSQNTLYF;TRA:CALSGKGTGSKLSF
clone_632_seq_2	H11_clonotype1483	1	TRB:CASSLWGANTGQLYF;TRA:CAAPNTEGADRLTF
clone_633_seq_2	H11_clonotype1484	1	TRB:CASSLGNSYNSPLYF;TRA:CALASSGSWQLIF
clone_634_seq_2	H11_clonotype1485	1	TRB:CASGPRDRNNQAPLF;TRA:CALRMATGGNNKLTF
clone_635_seq_2	H11_clonotype1486	1	TRB:CASGDAGTGGETLYF;TRA:CVVGDRGSALGRLHF
clone_636_seq_2	H11_clonotype1487	1	TRB:CASGGTGGNYAEQFF;TRA:CALSVYQGGRALIF
clone_637_seq_2	H11_clonotype1488	1	TRB:CASSRPDRRGDTQYF;TRA:CVLSAMNTEGADRLTF
clone_638_seq_2	H11_clonotype1489	1	TRB:CASSPGTTNTGQLYF;TRA:CALSDTSSGQKLVF
clone_639_seq_2	H11_clonotype1490	1	TRB:CASGDVSGGAREQYF;TRA:CALVDMNYNQGKLIF
clone_640_seq_2	H11_clonotype1491	1	TRB:CASGASGTGNYEQYF;TRA:CAVREMATGGNNKLTF
clone_641_seq_2	H11_clonotype1492	1	TRB:CASSPLGGYYAEQFF;TRA:CALSETTASLGKLQF
clone_642_seq_2	H11_clonotype1493	1	TRB:CASSLGGASQNTLYF;TRA:CAAPSSFSKLVF
clone_643_seq_2	H11_clonotype1494	1	TRB:CASSLETHSAETLYF;TRA:CAAGASNYQLIW
clone_644_seq_2	H11_clonotype1495	1	TRB:CASGDATGGQNTLYF;TRA:CAARRSNNRLTL
clone_645_seq_2	H11_clonotype1496	1	TRB:CASGDAGASQNTLYF;TRA:CAATTGYQNFYF
clone_646_seq_2	H11_clonotype1497	1	TRA:CALRLNNNNAPRF
clone_647_seq_2	H11_clonotype1498	1	TRB:CASGDGGGAANERLFF
clone_648_seq_2	H11_clonotype1499	1	TRB:CASSPRTGGNYAEQFF
clone_649_seq_2	H11_clonotype1500	1	TRB:CASSLYWGDNYAEQFF;TRA:CAIDTNAYKVIF
clone_650_seq_2	H11_clonotype1501	1	TRB:CASGDDPGTGQNTLYF;TRA:CAAPGSALGRLHF
clone_651_seq_2	H11_clonotype1502	1	TRB:CASSPRTGGYNSPLYF;TRA:CAVPLPGTGSNRLTF;TRA:CAVSQGGRALIF
clone_652_seq_2	H11_clonotype1503	1	TRB:CASSLLGGPSAETLYF;TRA:CALTGSGGKLTL
clone_653_seq_2	H11_clonotype1504	1	TRB:CASSLGGLLSAETLYF;TRA:CALSDRGYKLTF
clone_654_seq_2	H11_clonotype1505	1	TRB:CASGDAGGANTGQLYF;TRA:CAASRDSGYNKLTF
clone_655_seq_2	H11_clonotype1506	1	TRB:CASGDAPGSSQNTLYF;TRA:CAASELNYNQGKLIF
clone_656_seq_2	H11_clonotype1507	1	TRB:CASGDARRVGAETLYF;TRA:CAVSRNYGSSGNKLIF
clone_657_seq_2	H11_clonotype1508	1	TRB:CASGDEGLGGAETLYF;TRA:CAASPDYANKMIF
clone_658_seq_2	H11_clonotype1509	1	TRB:CASGDRTGGAVQNTLYF
clone_659_seq_2	H11_clonotype1510	1	TRB:CASGDQGTGGSQNTLYF;TRA:CALSDRGQGKLIF
clone_660_seq_2	H11_clonotype1511	1	TRB:CASGDRGPGGAPREQYF;TRA:CALGVYNTNTGKLTF;TRA:CALMNYNQGKLIF
clone_661_seq_2	H11_clonotype1513	1	TRB:CASSLDWGGPSQNTLYF;TRA:CALGGGTGANTGKLTF
clone_662_seq_2	H11_clonotype1514	1	TRB:CASGDWSGPNSYNSPLYF;TRA:CAAITSGGNYKPTF
clone_663_seq_2	H11_clonotype1515	1	TRB:CASSPSTGRRDGQNTLYF;TRA:CALSDMSNYNVLYF
clone_664_seq_2	H11_clonotype165	1	TRB:CASSDGDWGEQYF;TRA:CALEPTGNTGKLIF
clone_665_seq_2	H11_clonotype167	1	TRB:CASSLETLYF;TRA:CAMVLNSGGSNAKLTF;TRA:CAVSAGGSNAKLTF
clone_666_seq_2	H11_clonotype169	1	TRB:CGARDWGSSYEQYF;TRA:CAATANTGANTGKLTF;TRA:CALSGNNRIFF
clone_667_seq_2	H11_clonotype170	1	TRB:CASSQEGGGYEQYF;TRA:CAANTGGNNKLTF
clone_668_seq_2	H11_clonotype172	1	TRB:CASSLDNYEQYF;TRA:CALSYLSGSFNKLTF
clone_669_seq_2	H11_clonotype173	1	TRB:CASSRASSYEQYF;TRA:CAASGANTGKLTF
clone_670_seq_2	H11_clonotype176	1	TRB:CASSDHRGENTLYF;TRA:CAIDANKMIF
clone_671_seq_2	H11_clonotype180	1	TRB:CASRLGGYEQYF;TRA:CAVSFTGANTGKLTF
clone_672_seq_2	H11_clonotype181	1	TRB:CASRKDWGGFYEQYF;TRB:CASSQEGGSYEQYF;TRA:CAASEDQGGSAKLIF
clone_673_seq_2	H11_clonotype183	1	TRB:CASSDAGTDYAEQFF;TRA:CAASRPGSGGKLTL
clone_674_seq_2	H11_clonotype184	1	TRB:CASSQETRGQYF;TRA:CAVSINTGNYKYVF
clone_675_seq_2	H11_clonotype186	1	TRB:CASSRDRGQDTQYF;TRA:CALRPSGSWQLIF
clone_676_seq_2	H11_clonotype187	1	TRB:CASRTGTGGAQDTQYF;TRA:CALPITGNTGKLIF;TRA:CAVSHSNTNKVVF
clone_677_seq_2	H11_clonotype195	1	TRB:CASSLHRDANTEVFF;TRA:CAASAGMGYKLTF
clone_678_seq_2	H11_clonotype198	1	TRB:CASSPDWVNQDTQYF;TRA:CALGSSGSWQLIF
clone_679_seq_2	H11_clonotype199	1	TRB:CTCSEGQAERLFF;TRA:CALRTTASLGKLQF;TRA:CAPSMSNYNVLYF
clone_680_seq_2	H11_clonotype206	1	TRB:CASSFHRGDERLFF;TRB:CASSSSGQANQAPLF;TRA:CALGDPNSGTYQRF
clone_681_seq_2	H11_clonotype207	1	TRB:CASSPTASAETLYF;TRA:CAARRSGGSNAKLTF
clone_682_seq_2	H11_clonotype219	1	TRB:CASSILGGYAEQFF;TRA:CALSLTGFASALTF
clone_683_seq_2	H11_clonotype223	1	TRB:CTCSAVTTNTGQLYF;TRA:CAAEAGNTGKLIF
clone_684_seq_2	H11_clonotype227	1	TRB:CASGDGGGEVFF;TRA:CAMEVETGFASALTF;TRA:CAVRPSNQGGSAKLIF
clone_685_seq_2	H11_clonotype231	1	TRB:CASGETANSDYTF;TRA:CAMGGNYAQGLTF
clone_686_seq_2	H11_clonotype237	1	TRB:CASGGGQGENSPLYF;TRA:CVRNNAGAKLTF
clone_687_seq_2	H11_clonotype239	1	TRB:CAWGRGEVFF
clone_688_seq_2	H11_clonotype240	1	TRB:CAWGRGEVFF
clone_689_seq_2	H11_clonotype241	1	TRB:CAWGRGEVFF
clone_690_seq_2	H11_clonotype242	1	TRB:CAWGRGEVFF
clone_691_seq_2	H11_clonotype244	1	TRB:CAWSLRYEQYF;TRA:CALSGGGSNAKLTF;TRA:CAVSGNYNQGKLIF
clone_692_seq_2	H11_clonotype245	1	TRB:CASSGRDTQYF;TRB:CAWSPGVYAEQFF;TRA:CAVSPGGSNAKLTF
clone_693_seq_2	H11_clonotype246	1	TRB:CASSDTAEVFF;TRA:CAASRNSNNRIFF
clone_694_seq_2	H11_clonotype247	1	TRB:CARTYAEQFF
clone_695_seq_2	H11_clonotype248	1	TRA:CAALLSNYQLIW
clone_696_seq_2	H11_clonotype250	1	TRA:CAANTGYQNFYF
clone_697_seq_2	H11_clonotype253	1	TRB:CAWSPGGDTLYF
clone_698_seq_2	H11_clonotype254	1	TRB:CAWSPGGDTLYF
clone_699_seq_2	H11_clonotype255	1	TRB:CASSDTRDEQYF
clone_700_seq_2	H11_clonotype256	1	TRB:CASSDDKNTLYF
clone_701_seq_2	H11_clonotype258	1	TRB:CASSAGTKTLYF
clone_702_seq_2	H11_clonotype259	1	TRB:CGAREGNTEVFF
clone_703_seq_2	H11_clonotype260	1	TRB:CGARGQYAEQFF
clone_704_seq_2	H11_clonotype261	1	TRB:CGAQISQNTLYF
clone_705_seq_2	H11_clonotype263	1	TRB:CACRLGGGEQYF;TRB:CASSENTLYF;TRA:CAPLNTGNYKYVF
clone_706_seq_2	H11_clonotype264	1	TRB:CASRDSAETLYF;TRB:CASSLDTNTEVFF;TRA:CAAEPTGGNNKLTF;TRA:CILRDSGGSNYKLTF
clone_707_seq_2	H11_clonotype265	1	TRB:CGARDNNERLFF;TRA:CAAEATGGYKVVF
clone_708_seq_2	H11_clonotype266	1	TRB:CASRDWGYEQYF;TRA:CAAENTEGADRLTF
clone_709_seq_2	H11_clonotype267	1	TRB:CGAKTGNERLFF;TRA:CAVSLTGSGGKLTL
clone_710_seq_2	H11_clonotype268	1	TRB:CGARPGGASQYF;TRA:CAASDNTNTGKLTF
clone_711_seq_2	H11_clonotype269	1	TRB:CGAREGADTQYF;TRA:CALSDLSGNEKITF
clone_712_seq_2	H11_clonotype270	1	TRB:CASRGGQNTLYF;TRA:CVVGATNTGKLTF
clone_713_seq_2	H11_clonotype271	1	TRB:CASSERGDEQYF;TRB:CASSPSGTGGGNTLYF;TRA:CAASSGGNYKPTF;TRA:CALSASSNMGYKLTF
clone_714_seq_2	H11_clonotype272	1	TRB:CASSAYRDTSGNTLYF;TRB:CGVTDSGNTLYF;TRA:CAASEGMGYKLTF;TRA:CAVSMLSGSFNKLTF
clone_715_seq_2	H11_clonotype273	1	TRB:CAWSLTGGAPLF;TRA:CAASPNSGGSNAKLTF
clone_716_seq_2	H11_clonotype274	1	TRB:CASGGTSEVFF;TRA:CAVSPNTGYQNFYF
clone_717_seq_2	H11_clonotype275	1	TRB:CASSSDTYEQYF;TRA:CALSDRFGSWQLIF
clone_718_seq_2	H11_clonotype276	1	TRB:CGARDTANTLYF;TRA:CAASGGTGGYKVVF;TRA:CAVSAGTQVVGQLTF
clone_719_seq_2	H11_clonotype279	1	TRA:CAFNVGDNSKLIW
clone_720_seq_2	H11_clonotype280	1	TRA:CALERNAGAKLTF
clone_721_seq_2	H11_clonotype281	1	TRB:CASSSQREQYF
clone_722_seq_2	H11_clonotype282	1	TRA:CAAAMSNYNVLYF
clone_723_seq_2	H11_clonotype283	1	TRA:CAAAMSNYNVLYF
clone_724_seq_2	H11_clonotype284	1	TRA:CAYYSNNRLTL
clone_725_seq_2	H11_clonotype285	1	TRB:CAWRDNSAETLYF
clone_726_seq_2	H11_clonotype286	1	TRB:CAWSLRGGAEVFF
clone_727_seq_2	H11_clonotype287	1	TRB:CAWSLSANTEVFF
clone_728_seq_2	H11_clonotype291	1	TRB:CASSEGHSYEQYF
clone_729_seq_2	H11_clonotype292	1	TRB:CASSGQGNTEVFF
clone_730_seq_2	H11_clonotype293	1	TRB:CASSGGPQNTLYF
clone_731_seq_2	H11_clonotype294	1	TRB:CGARGVPYAEQFF
clone_732_seq_2	H11_clonotype295	1	TRB:CASGDWGDEQYF;TRA:CIVTDSAGNKLTF
clone_733_seq_2	H11_clonotype297	1	TRB:CAWSLGTNTEVFF;TRA:CILRLQGTGSKLSF
clone_734_seq_2	H11_clonotype298	1	TRB:CASSLREVFF;TRA:CAADTGYQNFYF
clone_735_seq_2	H11_clonotype299	1	TRB:CGARGRAGSDYTF;TRA:CASFYSNYQLIW
clone_736_seq_2	H11_clonotype300	1	TRB:CAWRGQGNERLFF;TRA:CAVRDNNAPRF
clone_737_seq_2	H11_clonotype301	1	TRB:CATGTGNTEVFF;TRA:CIVTHASSGSWQLIF
clone_738_seq_2	H11_clonotype302	1	TRB:CASSELGGPEQYF;TRA:CAVRGNMGYKLTF
clone_739_seq_2	H11_clonotype303	1	TRB:CGARDWGLDTQYF;TRA:CIVTDRGSALGRLHF
clone_740_seq_2	H11_clonotype304	1	TRB:CGARAGSQNTLYF;TRA:CAYSGGSNAKLTF
clone_741_seq_2	H11_clonotype305	1	TRB:CASGDNNERLFF;TRA:CAAEAETGGYKVVF
clone_742_seq_2	H11_clonotype307	1	TRB:CAWSARGGSPLYF;TRA:CALSDTNTGANTGKLTF;TRA:CAVRVDSNYQLIW
clone_743_seq_2	H11_clonotype308	1	TRB:CASSDSGYEQYF;TRA:CAAESPNTGYQNFYF
clone_744_seq_2	H11_clonotype310	1	TRB:CASSEEGHTEVFF;TRB:CASSLRLGGYAEQFF;TRA:CAARNNAGAKLTF;TRA:CAMREAYQGGRALIF
clone_745_seq_2	H11_clonotype311	1	TRB:CASSEEGHTEVFF;TRA:CAARNNAGAKLTF
clone_746_seq_2	H11_clonotype313	1	TRB:CASSGTAKETLYF;TRA:CAASNNSNNRIFF
clone_747_seq_2	H11_clonotype314	1	TRB:CGAKTGRNTEVFF;TRA:CAVRSTGGYKVVF
clone_748_seq_2	H11_clonotype315	1	TRB:CGAKDNSGNTLYF;TRA:CAAEAYQGGSAKLIF
clone_749_seq_2	H11_clonotype316	1	TRB:CGARVPGSYEQYF;TRA:CALSDDSNNRIFF
clone_750_seq_2	H11_clonotype317	1	TRB:CASSRDRGEVFF;TRA:CALSMSNYNVLYF
clone_751_seq_2	H11_clonotype319	1	TRB:CASSTGDEQYF;TRA:CAVSESSGYNKLTF
clone_752_seq_2	H11_clonotype320	1	TRB:CASGDGYQAPLF;TRB:CASSGQNTEVFF;TRA:CAVVPGTGSNRLTF
clone_753_seq_2	H11_clonotype321	1	TRB:CASGDAAPDYTF;TRA:CAANTNSAGNKLTF
clone_754_seq_2	H11_clonotype322	1	TRB:CASGDGGHEQYF;TRA:CAPMRNNNNAPRF
clone_755_seq_2	H11_clonotype323	1	TRB:CASSQGAYAEQFF;TRA:CVFPDYSNNRLTL
clone_756_seq_2	H11_clonotype324	1	TRB:CASSEGHRGNSPLYF;TRB:CASSGQGNERLFF;TRA:CAVSSPSNTNKVVF
clone_757_seq_2	H11_clonotype325	1	TRB:CSSRVGTNTEVFF;TRA:CAMRYNSAGNKLTF
clone_758_seq_2	H11_clonotype327	1	TRB:CGARDRNTGQLYF;TRA:CAASEREAGAKLTF
clone_759_seq_2	H11_clonotype328	1	TRB:CASSHSGNTLYF;TRA:CVLSANYGNEKITF
clone_760_seq_2	H11_clonotype329	1	TRB:CASSQDPGVTSGNTLYF;TRB:CASSRSQNTLYF;TRA:CAASEPGGSNYQLIW
clone_761_seq_2	H11_clonotype330	1	TRB:CASGDRNTEVFF;TRA:CARTSGGNYKPTF
clone_762_seq_2	H11_clonotype331	1	TRB:CGAGTGANTEVFF;TRA:CALGDPNTNKVVF
clone_763_seq_2	H11_clonotype332	1	TRB:CGARTGGLYEQYF;TRA:CALSSNTNKVVF
clone_764_seq_2	H11_clonotype333	1	TRB:CASSPQGSGNTLYF;TRB:CGASRGVYAEQFF;TRA:CAVPRGGNYKYVF
clone_765_seq_2	H11_clonotype334	1	TRB:CGASWGNYAEQFF;TRA:CALRDVNTGNYKYVF
clone_766_seq_2	H11_clonotype335	1	TRB:CASSQVQNEQYF;TRA:CALSDRQGGRALIF
clone_767_seq_2	H11_clonotype336	1	TRB:CAWSQTGAYEQYF;TRA:CALGITGNTGKLIF
clone_768_seq_2	H11_clonotype337	1	TRB:CAWSQNSGNTLYF;TRA:CALSVSGGNYKPTF
clone_769_seq_2	H11_clonotype338	1	TRB:CASSNSFGNTLYF;TRA:CVLTLTSGGNYKPTF
clone_770_seq_2	H11_clonotype339	1	TRB:CASSDTGGQAPLF;TRA:CALSRTSSGQKLVF
clone_771_seq_2	H11_clonotype342	1	TRB:CASSDRVTEVFF;TRA:CALALTGNTGKLIF
clone_772_seq_2	H11_clonotype343	1	TRB:CASSAGSSYEQYF;TRA:CALGNTNTGKLTF
clone_773_seq_2	H11_clonotype344	1	TRB:CASSLKYEQYF;TRA:CALGVSNTNKVVF
clone_774_seq_2	H11_clonotype345	1	TRB:CGALDWGSYEQYF;TRA:CALNVGDNSKLIW
clone_775_seq_2	H11_clonotype346	1	TRB:CAWSRQGNSPLYF;TRA:CALGDSSNYNVLYF
clone_776_seq_2	H11_clonotype347	1	TRB:CASSDHRASLFF;TRA:CAASDSSFSKLVF;TRA:CALRENQGGSAKLIF
clone_777_seq_2	H11_clonotype348	1	TRB:CASSWDWTAEQFF;TRA:CALGGNNYAQGLTF
clone_778_seq_2	H11_clonotype349	1	TRB:CGARPGGAETLYF;TRA:CAVSDMRGSSGNKLIF
clone_779_seq_2	H11_clonotype350	1	TRB:CGARDINQDTQYF;TRA:CALWELSSGSWQLIF;TRA:CAMREGMSNYNVLYF
clone_780_seq_2	H11_clonotype351	1	TRB:CGARQGGNTEVFF;TRA:CALGDRSGSWQLIF
clone_781_seq_2	H11_clonotype352	1	TRB:CASSDEDSPLYF;TRA:CAMREDLMDYANKMIF
clone_782_seq_2	H11_clonotype353	1	TRB:CASSLTGGDSDYTF;TRB:CASSQRDWEQYF;TRA:CAASAGGYKVVF
clone_783_seq_2	H11_clonotype354	1	TRB:CGARDSLNTEVFF;TRA:CAMRDPYGSSGNKLIF
clone_784_seq_2	H11_clonotype355	1	TRB:CASSDRQAEEVFF;TRA:CAASDYANKMIF
clone_785_seq_2	H11_clonotype356	1	TRB:CAWSLEQPYEQYF;TRA:CAASGGSFNKLTF
clone_786_seq_2	H11_clonotype357	1	TRB:CSSRTTWGERLFF;TRA:CAASANSNNRIFF
clone_787_seq_2	H11_clonotype358	1	TRB:CASSGDNQDTQYF;TRA:CALWELEDYQLIW
clone_788_seq_2	H11_clonotype360	1	TRA:CAASPGGRALIF
clone_789_seq_2	H11_clonotype361	1	TRA:CASSSNTNKVVF
clone_790_seq_2	H11_clonotype362	1	TRB:CASSRQNTEVFF
clone_791_seq_2	H11_clonotype363	1	TRB:CASSRQNTEVFF
clone_792_seq_2	H11_clonotype364	1	TRB:CASSQDGQYEQYF
clone_793_seq_2	H11_clonotype366	1	TRA:CAAEPMSNYNVLYF
clone_794_seq_2	H11_clonotype367	1	TRA:CAAEPMSNYNVLYF
clone_795_seq_2	H11_clonotype369	1	TRA:CAAEALSNYNVLYF
clone_796_seq_2	H11_clonotype370	1	TRA:CAAEALSNYNVLYF
clone_797_seq_2	H11_clonotype371	1	TRA:CAAEAFSNYNVLYF
clone_798_seq_2	H11_clonotype372	1	TRA:CAAEAMSNYNVLYF
clone_799_seq_2	H11_clonotype373	1	TRA:CVWGSNNRIFF
clone_800_seq_2	H11_clonotype374	1	TRB:CASGLGDSAETLYF
clone_801_seq_2	H11_clonotype375	1	TRB:CASGLGDSAETLYF
clone_802_seq_2	H11_clonotype376	1	TRB:CAWSRLGANSDYTF
clone_803_seq_2	H11_clonotype377	1	TRB:CAWSPWGGAHEQYF
clone_804_seq_2	H11_clonotype378	1	TRB:CAWSPWGGAHEQYF
clone_805_seq_2	H11_clonotype379	1	TRB:CAWSPWGGAHEQYF
clone_806_seq_2	H11_clonotype380	1	TRB:CAWSRTSSQNTLYF
clone_807_seq_2	H11_clonotype381	1	TRB:CAWSLTWGGGEQYF
clone_808_seq_2	H11_clonotype382	1	TRB:CAWSLAGMNTEVFF
clone_809_seq_2	H11_clonotype383	1	TRB:CASSSGERLFF
clone_810_seq_2	H11_clonotype384	1	TRB:CASGREAETLYF
clone_811_seq_2	H11_clonotype385	1	TRB:CASSIKDTQYF
clone_812_seq_2	H11_clonotype387	1	TRB:CASSHYAEQFF
clone_813_seq_2	H11_clonotype388	1	TRB:CASKDNSGNTLYF
clone_814_seq_2	H11_clonotype389	1	TRB:CASSETGENTLYF
clone_815_seq_2	H11_clonotype390	1	TRB:CASSSGTGDEQYF
clone_816_seq_2	H11_clonotype391	1	TRB:CASRDNISNERLFF
clone_817_seq_2	H11_clonotype392	1	TRB:CASSRDWGDAEQFF
clone_818_seq_2	H11_clonotype393	1	TRB:CASRAGENTGQLYF
clone_819_seq_2	H11_clonotype394	1	TRB:CASSELYNYAEQFF
clone_820_seq_2	H11_clonotype395	1	TRB:CASSDPGSNSDYTF
clone_821_seq_2	H11_clonotype396	1	TRB:CASSDRQDFTEVFF
clone_822_seq_2	H11_clonotype397	1	TRB:CASSDPGAQDTQYF
clone_823_seq_2	H11_clonotype398	1	TRB:CASSDEDRNSDYTF
clone_824_seq_2	H11_clonotype399	1	TRB:CASSDDSYNSPLYF
clone_825_seq_2	H11_clonotype401	1	TRB:CASSDLGSAETLYF
clone_826_seq_2	H11_clonotype402	1	TRB:CASSDLGSAETLYF
clone_827_seq_2	H11_clonotype403	1	TRB:CASSGPQGAYEQYF
clone_828_seq_2	H11_clonotype404	1	TRB:CGARKQGAHSDYTF
clone_829_seq_2	H11_clonotype409	1	TRB:CGVRDWGAQDTQYF
clone_830_seq_2	H11_clonotype410	1	TRB:CGVRDWGAQDTQYF
clone_831_seq_2	H11_clonotype411	1	TRB:CASSFSERLFF;TRA:CAIAPNYNVLYF
clone_832_seq_2	H11_clonotype412	1	TRB:CASRGDWVYEQYF;TRA:CIVTASSGSWQLIF
clone_833_seq_2	H11_clonotype413	1	TRB:CASSDGGLTDYTF;TRA:CAAVTNTGKLTF
clone_834_seq_2	H11_clonotype414	1	TRB:CASGLGDSAETLYF;TRB:CASRQGNSDYTF;TRA:CALERSNNNAPRF;TRA:CAVMTGNTGKLIF
clone_835_seq_2	H11_clonotype415	1	TRB:CASNRGDTQYF;TRA:CATNNNAGAKLTF
clone_836_seq_2	H11_clonotype416	1	TRB:CASSARQNTLYF;TRA:CIVTVTSYNQGKLIF
clone_837_seq_2	H11_clonotype417	1	TRB:CASSQRQFYEQYF;TRA:CAVSTNTGKLTF
clone_838_seq_2	H11_clonotype418	1	TRB:CASSRGTDEQYF;TRA:CATETNTGKLTF
clone_839_seq_2	H11_clonotype420	1	TRB:CGARDWGNTGQLYF;TRA:CAAGLTGGNNKLTF
clone_840_seq_2	H11_clonotype421	1	TRB:CGARDWGSSYEQYF;TRA:CATGNMGYKLTF
clone_841_seq_2	H11_clonotype422	1	TRB:CASSLVGYEQYF;TRA:CAAEGINTGNYKYVF
clone_842_seq_2	H11_clonotype423	1	TRB:CASSPRQQDTQYF;TRA:CAVSMTGGYKVVF
clone_843_seq_2	H11_clonotype424	1	TRB:CASSLEDIYEQYF;TRA:CAVTSSGSWQLIF
clone_844_seq_2	H11_clonotype425	1	TRB:CASSDAGTGGYEQYF;TRB:CAWSPWGGAHEQYF;TRA:CAAEVPTGGNNKLTF;TRA:CAVKGGTGGYKVVF
clone_845_seq_2	H11_clonotype426	1	TRB:CAWSFGGARAEQFF;TRA:CATFNYNQGKLIF
clone_846_seq_2	H11_clonotype427	1	TRB:CASSLGAEQFF;TRA:CAVSGPNTNKVVF
clone_847_seq_2	H11_clonotype428	1	TRB:CASSPRQGYEQYF;TRA:CATDDTNAYKVIF
clone_848_seq_2	H11_clonotype429	1	TRB:CASSDWGEDTQYF;TRA:CAAERATGGNNKLTF
clone_849_seq_2	H11_clonotype430	1	TRB:CASSETGENTLYF;TRB:CASSGTGVSYEQYF;TRA:CAASKGGTNAYKVIF;TRA:CAERTSSGQKLVF
clone_850_seq_2	H11_clonotype431	1	TRB:CGARQGKDTGQLYF;TRA:CAASPNSNNRIFF
clone_851_seq_2	H11_clonotype432	1	TRB:CGARSGTSAETLYF;TRA:CAVSDTNTGKLTF
clone_852_seq_2	H11_clonotype433	1	TRB:CGARGTSSGNTLYF;TRA:CAVSMYLGYKLTF
clone_853_seq_2	H11_clonotype434	1	TRB:CASSQEAGDTQYF;TRB:CASSYRGLEQYF;TRA:CAVRSNTGYQNFYF
clone_854_seq_2	H11_clonotype435	1	TRB:CAWSRTASAETLYF;TRA:CALRMSNYNVLYF
clone_855_seq_2	H11_clonotype438	1	TRB:CASSFRYEQYF;TRA:CATDDGYNQGKLIF
clone_856_seq_2	H11_clonotype439	1	TRB:CASSEGPQNTLYF;TRA:CAASPDTNAYKVIF
clone_857_seq_2	H11_clonotype440	1	TRB:CASSDFGGAREQYF;TRA:CAASLTGSGGKLTL
clone_858_seq_2	H11_clonotype441	1	TRB:CGARDWGSSYEQYF;TRA:CATDATEGADRLTF
clone_859_seq_2	H11_clonotype442	1	TRB:CGAREWGREDTQYF;TRA:CALAGSGGKLTL
clone_860_seq_2	H11_clonotype443	1	TRB:CASSQGWEQYF;TRA:CAARFYGSSGNKLIF
clone_861_seq_2	H11_clonotype444	1	TRB:CASRQEGTQYF;TRA:CAASMDSNNRIFF
clone_862_seq_2	H11_clonotype445	1	TRB:CASSDAGTGYEQYF;TRA:CALGSAGNKLTF;TRA:CAMREGPGGNYKPTF
clone_863_seq_2	H11_clonotype446	1	TRB:CASSGDINYAEQFF;TRA:CAVSEDYANKMIF
clone_864_seq_2	H11_clonotype447	1	TRB:CASSFGNSDYTF;TRA:CAMDSGTGSFNKLTF
clone_865_seq_2	H11_clonotype448	1	TRB:CGARDWGSSYEQYF;TRA:CALGHYGNEKITF
clone_866_seq_2	H11_clonotype449	1	TRB:CAWSLDRGNTEVFF;TRA:CALSADSNYQLIW
clone_867_seq_2	H11_clonotype450	1	TRB:CAVGQGRGVFF;TRA:CAASTDGSSGNKLIF;TRA:CAVSASSNYNVLYF
clone_868_seq_2	H11_clonotype451	1	TRB:CASSSGQNTEVFF;TRA:CAVTASSGSWQLIF
clone_869_seq_2	H11_clonotype452	1	TRB:CASSDWGSYEQYF;TRA:CAASVTASLGKLQF
clone_870_seq_2	H11_clonotype453	1	TRB:CASSDKGNSDYTF;TRA:CAASPSSGSWQLIF
clone_871_seq_2	H11_clonotype454	1	TRB:CASSDWGSSYEQYF;TRA:CAASLGNSGTYQRF
clone_872_seq_2	H11_clonotype455	1	TRB:CASPNRNSDYTF;TRB:CASRRDWGGSAETLYF;TRA:CVVGDRGSALGRLHF
clone_873_seq_2	H11_clonotype456	1	TRB:CASSDAGNSDYTF;TRA:CAVSAWGTGYQNFYF
clone_874_seq_2	H11_clonotype457	1	TRB:CASSGDSSYEQYF;TRB:CASSLDTAETLYF;TRA:CARPLSSNTNKVVF
clone_875_seq_2	H11_clonotype458	1	TRB:CASSAGQGVTEVFF;TRA:CVVGDRGSALGRLHF
clone_876_seq_2	H11_clonotype459	1	TRB:CASSFSQNTLYF;TRA:CAASMVKNYAQGLTF
clone_877_seq_2	H11_clonotype460	1	TRB:CASSQDPNQAPLF;TRA:CAASLMATGGNNKLTF
clone_878_seq_2	H11_clonotype461	1	TRB:CASSPTGNAEQFF;TRA:CAASNTNAYKVIF;TRA:CALTLVTNSAGNKLTF
clone_879_seq_2	H11_clonotype462	1	TRB:CASSRDWGYEQYF;TRA:CAMREGNTGNYKYVF
clone_880_seq_2	H11_clonotype463	1	TRB:CASDPGQNQAPLF;TRA:CAVRPPNQGGSAKLIF
clone_881_seq_2	H11_clonotype464	1	TRB:CASSDGRGQNTLYF;TRA:CAMREGYNQGKLIF
clone_882_seq_2	H11_clonotype468	1	TRB:CASSHNANTEVFF;TRA:CAASVGSNNRIFF
clone_883_seq_2	H11_clonotype470	1	TRB:CASSDRGDTEVFF;TRA:CAASRSTGNYKYVF
clone_884_seq_2	H11_clonotype471	1	TRB:CSSRHWGNQDTQYF;TRA:CALRGNEKITF
clone_885_seq_2	H11_clonotype473	1	TRB:CAWSLYPDIYEQYF;TRA:CALWELDTNAYKVIF
clone_886_seq_2	H11_clonotype474	1	TRB:CASSPRSSYEQYF;TRA:CALSLISGGSNAKLTF
clone_887_seq_2	H11_clonotype475	1	TRA:CAMRDYNQGKLIF
clone_888_seq_2	H11_clonotype476	1	TRB:CASSPSGQYEQYF
clone_889_seq_2	H11_clonotype478	1	TRB:CASSLPRNERLFF
clone_890_seq_2	H11_clonotype480	1	TRB:CASSQEGWGDEQYF
clone_891_seq_2	H11_clonotype481	1	TRB:CASSQVGQNTEVFF
clone_892_seq_2	H11_clonotype482	1	TRB:CASSQVGQNTEVFF
clone_893_seq_2	H11_clonotype483	1	TRB:CASSQVGQNTEVFF
clone_894_seq_2	H11_clonotype484	1	TRB:CASSQWRNYAEQFF
clone_895_seq_2	H11_clonotype485	1	TRB:CASSQGLGQDTQYF
clone_896_seq_2	H11_clonotype486	1	TRB:CASSPSGAQNTLYF
clone_897_seq_2	H11_clonotype487	1	TRA:CAVSGTNTGKLTF
clone_898_seq_2	H11_clonotype488	1	TRA:CAVSGTNTGKLTF
clone_899_seq_2	H11_clonotype489	1	TRA:CAFLSGSFNKLTF
clone_900_seq_2	H11_clonotype490	1	TRB:CAWSPGQTSAETLYF
clone_901_seq_2	H11_clonotype491	1	TRB:CAWSRGLGDYAEQFF
clone_902_seq_2	H11_clonotype492	1	TRB:CAWSLGTGGAETLYF
clone_903_seq_2	H11_clonotype493	1	TRB:CASSLRDSDYTF
clone_904_seq_2	H11_clonotype496	1	TRB:CASSLADAEQFF
clone_905_seq_2	H11_clonotype497	1	TRB:CASSLGAREVFF
clone_906_seq_2	H11_clonotype498	1	TRB:CASRYSSYEQYF
clone_907_seq_2	H11_clonotype499	1	TRB:CASSRQVNTEVFF
clone_908_seq_2	H11_clonotype503	1	TRB:CASRLGGYEQYF
clone_909_seq_2	H11_clonotype504	1	TRB:CASRLGGYEQYF
clone_910_seq_2	H11_clonotype505	1	TRB:CASRLGGYEQYF
clone_911_seq_2	H11_clonotype506	1	TRB:CASRLGGYEQYF
clone_912_seq_2	H11_clonotype507	1	TRB:CASSLEGGEQYF
clone_913_seq_2	H11_clonotype508	1	TRB:CASSLAGGEQFF
clone_914_seq_2	H11_clonotype509	1	TRB:CASSFGAETLYF
clone_915_seq_2	H11_clonotype510	1	TRB:CASSLQGGEQYF
clone_916_seq_2	H11_clonotype511	1	TRB:CASSPGQYEQYF
clone_917_seq_2	H11_clonotype512	1	TRB:CASSPGQYEQYF
clone_918_seq_2	H11_clonotype513	1	TRB:CASSRGQETLYF
clone_919_seq_2	H11_clonotype514	1	TRB:CASSLGGTEVFF
clone_920_seq_2	H11_clonotype515	1	TRB:CASSLGGTEVFF
clone_921_seq_2	H11_clonotype516	1	TRB:CASSLGGTEVFF
clone_922_seq_2	H11_clonotype517	1	TRB:CASSLGGTEVFF
clone_923_seq_2	H11_clonotype518	1	TRB:CASSLEGGTLYF
clone_924_seq_2	H11_clonotype519	1	TRB:CASSLGGDTQYF
clone_925_seq_2	H11_clonotype520	1	TRB:CASSFGFAEQFF
clone_926_seq_2	H11_clonotype521	1	TRB:CASNLGGGQNTLYF
clone_927_seq_2	H11_clonotype523	1	TRB:CASSRDWGVDTQYF
clone_928_seq_2	H11_clonotype524	1	TRB:CASSERQNNSPLYF
clone_929_seq_2	H11_clonotype525	1	TRB:CASSEGDANSDYTF
clone_930_seq_2	H11_clonotype526	1	TRB:CASSDAGSNERLFF
clone_931_seq_2	H11_clonotype527	1	TRB:CASSDGWGSYEQYF
clone_932_seq_2	H11_clonotype528	1	TRB:CASGGLGRYAEQFF
clone_933_seq_2	H11_clonotype529	1	TRB:CASGPLGGQNTLYF
clone_934_seq_2	H11_clonotype530	1	TRB:CASGDRRGGAEQFF
clone_935_seq_2	H11_clonotype531	1	TRB:CASGEGQGRNTLYF
clone_936_seq_2	H11_clonotype532	1	TRB:CASGDRGSAETLYF
clone_937_seq_2	H11_clonotype533	1	TRB:CASGDRGSAETLYF
clone_938_seq_2	H11_clonotype534	1	TRB:CASSDIRSNYAEQFF
clone_939_seq_2	H11_clonotype538	1	TRB:CASSGDRGRGTEVFF
clone_940_seq_2	H11_clonotype539	1	TRB:CASSGGQGSNERLFF
clone_941_seq_2	H11_clonotype540	1	TRB:CASSQTGATEVFF
clone_942_seq_2	H11_clonotype541	1	TRB:CASSQDRLNTLYF
clone_943_seq_2	H11_clonotype542	1	TRB:CASSYDNNQAPLF
clone_944_seq_2	H11_clonotype544	1	TRB:CASSYRDGTEVFF
clone_945_seq_2	H11_clonotype546	1	TRB:CTCSGDKEVFF
clone_946_seq_2	H11_clonotype547	1	TRB:CASSDAGSAETLYF;TRA:CAALDYSNNRLTL;TRA:CAIEGNNRIFF
clone_947_seq_2	H11_clonotype548	1	TRB:CASSSEQDTQYF;TRA:CALETNTNKVVF
clone_948_seq_2	H11_clonotype549	1	TRB:CASSLSGYEQYF;TRA:CALEPGSWQLIF
clone_949_seq_2	H11_clonotype550	1	TRB:CASSDTYNNQAPLF;TRA:CAIHQGGRALIF
clone_950_seq_2	H11_clonotype551	1	TRB:CASSSGAGNTLYF;TRA:CAARTNAYKVIF
clone_951_seq_2	H11_clonotype552	1	TRB:CASRLGQYAEQFF;TRA:CAFDSGYNKLTF
clone_952_seq_2	H11_clonotype553	1	TRB:CASSRGEVFF;TRA:CAIVNSAGNKLTF
clone_953_seq_2	H11_clonotype554	1	TRB:CASSHGGRSAETLYF;TRB:CASSLPRNERLFF;TRA:CAAEAMSNYNVLYF;TRA:CILRVVGTGYQNFYF
clone_954_seq_2	H11_clonotype555	1	TRB:CASSQERGRVEQFF;TRA:CAVRGNYQLIW
clone_955_seq_2	H11_clonotype556	1	TRB:CASREGISNERLFF;TRB:CASSQEAGGESQYF;TRA:CAIDPGGNYKPTF
clone_956_seq_2	H11_clonotype557	1	TRB:CASRKDWGGFYEQYF;TRB:CASSQEGGSYEQYF;TRA:CAAPSNMGYKLTF;TRA:CILRGPGGSNAKLTF
clone_957_seq_2	H11_clonotype558	1	TRB:CASRKDWGGFYEQYF;TRB:CASSQEGGSYEQYF;TRA:CAASEDQGGSAKLIF;TRA:CILRGPGGSNAKLTF
clone_958_seq_2	H11_clonotype559	1	TRB:CASSRDFYEQYF;TRA:CALEPTNAYKVIF
clone_959_seq_2	H11_clonotype561	1	TRB:CASSLGTTEVFF;TRA:CAAPTNYGNEKITF;TRA:CALESNYQLIW
clone_960_seq_2	H11_clonotype562	1	TRB:CASGEPGDQDTQYF;TRA:CALERNAGAKLTF
clone_961_seq_2	H11_clonotype563	1	TRB:CASSGDRGANERLFF;TRA:CAAERGGSAKLIF
clone_962_seq_2	H11_clonotype565	1	TRB:CASSQTGGRVQYF;TRA:CAIPNNYAQGLTF
clone_963_seq_2	H11_clonotype566	1	TRB:CASRGQLSAETLYF;TRB:CASSESGRDTQYF;TRA:CATDPTQVVGQLTF
clone_964_seq_2	H11_clonotype567	1	TRB:CASSPNWGQDTQYF;TRA:CAMEGIGTGSKLSF
clone_965_seq_2	H11_clonotype569	1	TRB:CAWSLGGLSYAEQFF;TRA:CAVYTGNYKYVF
clone_966_seq_2	H11_clonotype570	1	TRB:CASSLAGTGVFF;TRA:CAAEAGGSSGNKLIF;TRA:CAMGMNYNQGKLIF
clone_967_seq_2	H11_clonotype571	1	TRB:CASSLDRNTLYF;TRA:CAVLNSNNRIFF
clone_968_seq_2	H11_clonotype574	1	TRB:CASGDRVNNQAPLF;TRA:CALSGGAGAKLTF;TRA:CAVPGDNSKLIW
clone_969_seq_2	H11_clonotype576	1	TRB:CASSYWSAETLYF;TRA:CAIRTNSAGNKLTF
clone_970_seq_2	H11_clonotype577	1	TRB:CASSQDLGDAEQFF;TRA:CAASGTGSNRLTF;TRA:CALVANYNQGKLIF
clone_971_seq_2	H11_clonotype578	1	TRB:CAWTPLRVSGNTLYF;TRA:CAVSMWSNYQLIW
clone_972_seq_2	H11_clonotype579	1	TRB:CASSPGSYEQYF;TRA:CAMRDTNAYKVIF
clone_973_seq_2	H11_clonotype580	1	TRB:CASSLVRDEQYF;TRA:CAVTSNTGKLIF
clone_974_seq_2	H11_clonotype581	1	TRB:CASSFNRGEQYF;TRA:CAARGDSNYQLIW;TRA:CALSAHNYAQGLTF
clone_975_seq_2	H11_clonotype582	1	TRB:CASSPRRIQNTLYF;TRA:CAVSDNNAPRF
clone_976_seq_2	H11_clonotype584	1	TRB:CASSPNRDKEVFF;TRA:CAAATSSGQKLVF;TRA:CAASPSNTNKVVF
clone_977_seq_2	H11_clonotype585	1	TRB:CASKRQGSTEVFF;TRA:CAAEASGGSNYKLTF
clone_978_seq_2	H11_clonotype586	1	TRB:CTCSAGTVLFF;TRA:CAARGGSNAKLTF
clone_979_seq_2	H11_clonotype587	1	TRB:CASSQDLLGGTQYF;TRA:CAVQGGSAKLIF
clone_980_seq_2	H11_clonotype588	1	TRB:CASGDAEGREQYF;TRB:CASSQVGQNTEVFF;TRA:CAAEAKGDTGYQNFYF;TRA:CAVTYNNNAPRF
clone_981_seq_2	H11_clonotype589	1	TRB:CASSPGGRNTEVFF;TRB:CAWRTGVANTGQLYF;TRA:CATEISSSFSKLVF
clone_982_seq_2	H11_clonotype591	1	TRB:CAWGPSGINTGQLYF;TRA:CAVSASNYQLIW
clone_983_seq_2	H11_clonotype592	1	TRB:CASSPSSYEQYF;TRA:CAVSSNTNKVVF
clone_984_seq_2	H11_clonotype593	1	TRB:CASSPGNAEQFF;TRA:CVLRASNTNKVVF
clone_985_seq_2	H11_clonotype594	1	TRB:CASSSQNYEQYF;TRA:CALGEGNNRIFF
clone_986_seq_2	H11_clonotype595	1	TRB:CASSKASNTEVFF;TRB:CAWSLLTGGRAETLYF;TRA:CALGGQGGRALIF
clone_987_seq_2	H11_clonotype596	1	TRB:CASSFWGHEQYF;TRB:CASSRESGGEVNNQAPLF;TRA:CALEGRGYANKMIF;TRA:CAVSADGNEKITF
clone_988_seq_2	H11_clonotype597	1	TRB:CASRTRGGQNTLYF;TRA:CVLGVGTGGYKVVF
clone_989_seq_2	H11_clonotype598	1	TRB:CASRDWGGYAEQFF;TRA:CAASRVTNAYKVIF
clone_990_seq_2	H11_clonotype599	1	TRB:CASRWDRENTEVFF;TRA:CAPYQGGRALIF
clone_991_seq_2	H11_clonotype600	1	TRB:CASSGGTGGNTLYF;TRA:CAVSAAGYQNFYF
clone_992_seq_2	H11_clonotype601	1	TRB:CASRAGGLGTGQLYF;TRA:CVLSAGSNNRIFF
clone_993_seq_2	H11_clonotype602	1	TRB:CASSDPGGGGTPLYF;TRA:CAASMSSGSWQLIF
clone_994_seq_2	H11_clonotype603	1	TRB:CASSDAGTGGYEQYF;TRA:CAVKGGTGGYKVVF
clone_995_seq_2	H11_clonotype605	1	TRB:CTCSAAQEQYF;TRA:CAVSQGGRALIF
clone_996_seq_2	H11_clonotype607	1	TRB:CASSRQSNTEVFF;TRB:CAWGQFQGANSDYTF;TRA:CALGGLAGSFNKLTF;TRA:CALRTGGYKVVF
clone_997_seq_2	H11_clonotype608	1	TRB:CASSLFIYEQYF;TRA:CAAAPSGSWQLIF
clone_998_seq_2	H11_clonotype609	1	TRB:CASSLEGAEQFF;TRA:CALGRTGGYKVVF
clone_999_seq_2	H11_clonotype610	1	TRB:CASSLEGGEQYF;TRA:CALGRTGGYKVVF
clone_1000_seq_2	H11_clonotype611	1	TRB:CASSLRNTEVFF;TRA:CALRTLYSNNRLTL
clone_1001_seq_2	H11_clonotype612	1	TRB:CASSLSENTLYF;TRA:CAVRYNTNTGKLTF
clone_1002_seq_2	H11_clonotype613	1	TRB:CASSEREDQDTQYF;TRA:CALSDWNNNAPRF
clone_1003_seq_2	H11_clonotype614	1	TRB:CASSDWGGAGDTQYF;TRA:CAAIKSGGSNYKLTF
clone_1004_seq_2	H11_clonotype615	1	TRB:CASSDAQNSGNTLYF;TRA:CAVSGYNQGKLIF
clone_1005_seq_2	H11_clonotype618	1	TRB:CASSSQGYAEQFF;TRA:CAVSQPNAYKVIF
clone_1006_seq_2	H11_clonotype619	1	TRB:CASSLGRGETLYF;TRA:CAVSSSNMGYKLTF
clone_1007_seq_2	H11_clonotype621	1	TRB:CAWSHQGANTGQLYF;TRA:CALLSGGSNAKLTF
clone_1008_seq_2	H11_clonotype622	1	TRB:CASRGLGGLNQDTQYF;TRB:CASSDDRSAETLYF;TRA:CALSESGTGSKLSF
clone_1009_seq_2	H11_clonotype623	1	TRB:CASSDAGPGNTLYF;TRA:CALTYQGGRALIF
clone_1010_seq_2	H11_clonotype624	1	TRB:CASGDLGGYAEQFF;TRA:CAVRDYNVGDNSKLIW
clone_1011_seq_2	H11_clonotype625	1	TRB:CASSWTRHTEVFF;TRA:CAASGGANTGKLTF
clone_1012_seq_2	H11_clonotype627	1	TRB:CASSQDRENTEVFF;TRA:CALSEWSNYNVLYF
clone_1013_seq_2	H11_clonotype628	1	TRB:CASSQVGGDAEQFF;TRA:CALGTGSFNKLTF
clone_1014_seq_2	H11_clonotype629	1	TRB:CAWSPGTGWNSPLYF;TRA:CAVSAPSSSFSKLVF
clone_1015_seq_2	H11_clonotype630	1	TRB:CAWEEGSVSNERLFF;TRA:CALSEGTASLGKLQF
clone_1016_seq_2	H11_clonotype631	1	TRB:CASRRQGNTEVFF;TRB:CASSPGQYEQYF;TRA:CALAHRGSALGRLHF
clone_1017_seq_2	H11_clonotype632	1	TRB:CASSPGTGRNSDYTF;TRB:CASSRDTQYF;TRA:CALVGPTSSGQKLVF
clone_1018_seq_2	H11_clonotype633	1	TRB:CASSQVGSAETLYF;TRA:CAMREGNNNNAPRF
clone_1019_seq_2	H11_clonotype634	1	TRB:CASSQRGFQDTQYF;TRA:CAMRDPSNTNKVVF
clone_1020_seq_2	H11_clonotype636	1	TRB:CAWSFLRDSYAEQFF;TRA:CAMRPSSGSWQLIF
clone_1021_seq_2	H11_clonotype637	1	TRB:CASDPGQNQAPLF;TRB:CASSLKQYEQYF;TRA:CALSDHVGDNSKLIW
clone_1022_seq_2	H11_clonotype638	1	TRB:CASRGQNTEVFF;TRA:CALGGNYNQGKLIF
clone_1023_seq_2	H11_clonotype639	1	TRB:CASSERDSQDTQYF;TRA:CALGDRNSNNRIFF
clone_1024_seq_2	H11_clonotype640	1	TRB:CASGDADGLYEQYF;TRA:CALSRTSGGNYKPTF
clone_1025_seq_2	H11_clonotype641	1	TRB:CASSPDRGRGTEVFF;TRA:CALAASSGSWQLIF
clone_1026_seq_2	H11_clonotype642	1	TRB:CASSDNWGNYAEQFF;TRA:CAMRETDTNAYKVIF
clone_1027_seq_2	H11_clonotype643	1	TRB:CASSRTGQDTQYF;TRA:CALGPDTNAYKVIF
clone_1028_seq_2	H11_clonotype644	1	TRB:CASSQGTGGTEVFF;TRA:CAMREPLSGSFNKLTF
clone_1029_seq_2	H11_clonotype645	1	TRB:CASSDGVEGNSDYTF;TRA:CAMREGASGYNKLTF
clone_1030_seq_2	H11_clonotype646	1	TRB:CASGDAGGSYEQYF;TRA:CAGGNNNNAPRF
clone_1031_seq_2	H11_clonotype647	1	TRB:CASSQEEGYEQYF;TRA:CAAINTGKLTF
clone_1032_seq_2	H11_clonotype648	1	TRB:CASSLDRGRAAQYF;TRA:CAAPGGNNKLTF;TRA:CAARVNNNNAPRF
clone_1033_seq_2	H11_clonotype649	1	TRB:CAWSGDWGNTGQLYF;TRA:CAANQGGSAKLIF
clone_1034_seq_2	H11_clonotype650	1	TRB:CASSVRRNTLYF;TRA:CAMREGRDSGGSNYKLTF
clone_1035_seq_2	H11_clonotype652	1	TRB:CASSPDQSEQYF;TRA:CAARKQGTGSKLSF
clone_1036_seq_2	H11_clonotype653	1	TRB:CASSLGDLEQYF;TRA:CAAFSSNTNKVVF
clone_1037_seq_2	H11_clonotype654	1	TRB:CASSFRPSGNTLYF;TRB:CASSPQGGQDTQYF;TRA:CAARGYNQGKLIF
clone_1038_seq_2	H11_clonotype655	1	TRB:CASSVGGSTGQLYF;TRA:CAASGNQGGRALIF
clone_1039_seq_2	H11_clonotype656	1	TRB:CASSDAGRGNQAPLF;TRA:CAAQRNSNNRIFF
clone_1040_seq_2	H11_clonotype658	1	TRB:CASSETGGREETLYF;TRA:CAASLSSGSWQLIF
clone_1041_seq_2	H11_clonotype661	1	TRA:CAASWGGRALIF
clone_1042_seq_2	H11_clonotype662	1	TRA:CAAYNYAQGLTF
clone_1043_seq_2	H11_clonotype663	1	TRA:CAVSSNYNQGKLIF
clone_1044_seq_2	H11_clonotype664	1	TRA:CAVRKTASLGKLQF
clone_1045_seq_2	H11_clonotype667	1	TRA:CAASITGNTGKLIF
clone_1046_seq_2	H11_clonotype668	1	TRA:CAASQNYNQGKLIF
clone_1047_seq_2	H11_clonotype669	1	TRB:CASSTSGQLYF
clone_1048_seq_2	H11_clonotype670	1	TRA:CALRAGGSNAKLTF
clone_1049_seq_2	H11_clonotype671	1	TRA:CALRAGGSNAKLTF
clone_1050_seq_2	H11_clonotype673	1	TRB:CASSQETGGGNTQYF
clone_1051_seq_2	H11_clonotype674	1	TRB:CASSQDPGGDYEQYF
clone_1052_seq_2	H11_clonotype675	1	TRB:CASSQDGTGGGEQYF
clone_1053_seq_2	H11_clonotype676	1	TRB:CASSPGLDSQNTLYF
clone_1054_seq_2	H11_clonotype678	1	TRB:CASSSGQKNTLYF
clone_1055_seq_2	H11_clonotype680	1	TRB:CASSRDRGGNTLYF
clone_1056_seq_2	H11_clonotype681	1	TRB:CASSRDAGGNTLYF
clone_1057_seq_2	H11_clonotype682	1	TRB:CASSSAVSGNTLYF
clone_1058_seq_2	H11_clonotype683	1	TRB:CASSTSTNSDYTF
clone_1059_seq_2	H11_clonotype684	1	TRB:CASSLLQGNTLYF
clone_1060_seq_2	H11_clonotype685	1	TRB:CASSLDFGYEQYF
clone_1061_seq_2	H11_clonotype686	1	TRB:CASSLEDGNTLYF
clone_1062_seq_2	H11_clonotype687	1	TRB:CASSQGPQDTQYF
clone_1063_seq_2	H11_clonotype688	1	TRB:CASSRRSQNTLYF
clone_1064_seq_2	H11_clonotype689	1	TRB:CASSLSTNTEVFF
clone_1065_seq_2	H11_clonotype690	1	TRB:CASRPSNTGQLYF
clone_1066_seq_2	H11_clonotype691	1	TRB:CASSPDNNERLFF
clone_1067_seq_2	H11_clonotype692	1	TRB:CASRRNSGNTLYF
clone_1068_seq_2	H11_clonotype694	1	TRB:CASSTGTKDTQYF
clone_1069_seq_2	H11_clonotype696	1	TRB:CASSTGTKDTQYF
clone_1070_seq_2	H11_clonotype698	1	TRB:CASSYWGDAEQFF
clone_1071_seq_2	H11_clonotype701	1	TRB:CASSWGSSYEQYF
clone_1072_seq_2	H11_clonotype703	1	TRB:CASRPGGGNTGQLYF
clone_1073_seq_2	H11_clonotype705	1	TRB:CASSPDRVNQDTQYF
clone_1074_seq_2	H11_clonotype707	1	TRB:CASSDMGLSNERLFF
clone_1075_seq_2	H11_clonotype708	1	TRB:CASSGTGGNYAEQFF
clone_1076_seq_2	H11_clonotype709	1	TRB:CASGDWGHSQNTLYF
clone_1077_seq_2	H11_clonotype710	1	TRB:CASSDSLGFNYAEQFF
clone_1078_seq_2	H11_clonotype711	1	TRB:CASRTGTGGVYAEQFF
clone_1079_seq_2	H11_clonotype712	1	TRB:CASSDLDWGSQNTLYF
clone_1080_seq_2	H11_clonotype713	1	TRB:CASSQGVGAETLYF
clone_1081_seq_2	H11_clonotype714	1	TRB:CASSRTVGNSDYTF
clone_1082_seq_2	H11_clonotype715	1	TRB:CASSKGLGGDTQYF
clone_1083_seq_2	H11_clonotype716	1	TRB:CASSYSGGYAEQFF
clone_1084_seq_2	H11_clonotype717	1	TRB:CASSSGTGRSDYTF
clone_1085_seq_2	H11_clonotype718	1	TRB:CASSLPGGNERLFF
clone_1086_seq_2	H11_clonotype719	1	TRB:CASSPGQYNSPLYF;TRA:CAVRIFF;TRA:CAVSVTASLGKLQF
clone_1087_seq_2	H11_clonotype720	1	TRB:CASSLGGRDTQYF;TRA:CAIVDYNVLYF
clone_1088_seq_2	H11_clonotype721	1	TRB:CASSLTGWDTEVFF;TRA:CILRGTGYQNFYF
clone_1089_seq_2	H11_clonotype722	1	TRB:CASSLGRPYEQYF;TRA:CAMSYGNEKITF
clone_1090_seq_2	H11_clonotype723	1	TRB:CASGAGGANTGQLYF;TRA:CAIKTGGYKVVF
clone_1091_seq_2	H11_clonotype724	1	TRB:CASGDKENNYAEQFF;TRA:CILRVQGYANKMIF
clone_1092_seq_2	H11_clonotype725	1	TRB:CTCSAGNSPLYF;TRA:CAAMDSNYQLIW
clone_1093_seq_2	H11_clonotype726	1	TRB:CASSQLGGSAETLYF;TRA:CALGARSNTNKVVF;TRA:CALVRNSNNRIFF
clone_1094_seq_2	H11_clonotype727	1	TRB:CASSQELGGEDTQYF;TRA:CAIDKSNYNVLYF
clone_1095_seq_2	H11_clonotype728	1	TRB:CASGDRGPGGAPREQYF;TRB:CASRTGDNQAPLF;TRA:CAAPSNMGYKLTF;TRA:CAEMLSGSFNKLTF
clone_1096_seq_2	H11_clonotype729	1	TRB:CASSLGRLYEQYF;TRA:CALITGNTGKLIF
clone_1097_seq_2	H11_clonotype730	1	TRB:CASSDRGRGYAEQFF;TRB:CASSLPGDNSDYTF;TRA:CAILSGGNYKPTF
clone_1098_seq_2	H11_clonotype731	1	TRB:CASSGGQGAGNTLYF;TRA:CALERTNTNKVVF
clone_1099_seq_2	H11_clonotype732	1	TRB:CASGDARAYNSPLYF;TRA:CAYYSNNRLTL
clone_1100_seq_2	H11_clonotype733	1	TRB:CASSQDTQQNTLYF;TRA:CAAFTGSGGKLTL
clone_1101_seq_2	H11_clonotype734	1	TRB:CASSQDRVNERLFF;TRA:CAAESSNTNKVVF;TRA:CAARATSSGQKLVF
clone_1102_seq_2	H11_clonotype735	1	TRB:CASSYRDWGDEQYF;TRA:CAVDAGYKLTF;TRA:CAVSMRTNSAGNKLTF
clone_1103_seq_2	H11_clonotype736	1	TRB:CASSYWGGEDTQYF;TRA:CARESGGNNKLTF
clone_1104_seq_2	H11_clonotype737	1	TRB:CASSQPGQVQDTQYF;TRA:CAAEYMSNYNVLYF
clone_1105_seq_2	H11_clonotype739	1	TRB:CASSPRGAYNSPLYF;TRA:CATDNMGYKLTF
clone_1106_seq_2	H11_clonotype740	1	TRB:CASSDAGGRYAEQFF;TRA:CAMEPNTGYQNFYF
clone_1107_seq_2	H11_clonotype741	1	TRB:CASSDGGGRYAEQFF;TRA:CAVMSNYNVLYF
clone_1108_seq_2	H11_clonotype742	1	TRB:CASSRDWGGGEQYF;TRA:CAIDQGTGNYKYVF
clone_1109_seq_2	H11_clonotype743	1	TRB:CASSLGLGENTLYF;TRA:CAFFTGANTGKLTF
clone_1110_seq_2	H11_clonotype744	1	TRB:CASRTGSSAETLYF;TRA:CAASTGSFNKLTF
clone_1111_seq_2	H11_clonotype745	1	TRB:CASSPGTGVDEQYF;TRB:CSSSQSTGGTTGQLYF;TRA:CVQDYSNNRLTL
clone_1112_seq_2	H11_clonotype746	1	TRB:CASSLVKKDTQYF;TRA:CALSENSNNRIFF;TRA:CAVRNTEGADRLTF
clone_1113_seq_2	H11_clonotype747	1	TRB:CASSLNNYAEQFF;TRA:CAAETGNTGKLIF
clone_1114_seq_2	H11_clonotype748	1	TRB:CASSFQQRETLYF;TRA:CAGDDSGYNKLTF
clone_1115_seq_2	H11_clonotype750	1	TRB:CASSQDRGGNTEVFF;TRA:CADGSSGNKLIF
clone_1116_seq_2	H11_clonotype751	1	TRB:CASSQEGQGEDTQYF;TRA:CAVRMNYNQGKLIF
clone_1117_seq_2	H11_clonotype752	1	TRB:CASSQAGKANTEVFF;TRA:CAGFHDTNAYKVIF
clone_1118_seq_2	H11_clonotype754	1	TRB:CASSLADSTEVFF;TRA:CAVSTGANTGKLTF
clone_1119_seq_2	H11_clonotype755	1	TRB:CASRPLQGANTEVFF;TRB:CASSRLGGYAEQFF;TRA:CALERFSGGSNAKLTF;TRA:CALSFFNTGNYKYVF
clone_1120_seq_2	H11_clonotype756	1	TRB:CASSPTGGNTLYF;TRA:CALSDPGNRIFF
clone_1121_seq_2	H11_clonotype757	1	TRB:CASSFGRNTEVFF;TRA:CALSLNNYAQGLTF
clone_1122_seq_2	H11_clonotype758	1	TRB:CASSEGTGGPDTQYF;TRA:CAPIITGSGGKLTL
clone_1123_seq_2	H11_clonotype759	1	TRB:CASGDADKSGNTLYF;TRA:CAVSPWAQGLTF;TRA:CAVSQNTGGLSGKLTF
clone_1124_seq_2	H11_clonotype760	1	TRB:CASSQRGGNTEVFF;TRA:CAASHNTNTGKLTF
clone_1125_seq_2	H11_clonotype762	1	TRB:CASSYRGNYAEQFF;TRA:CAASPGNYKYVF
clone_1126_seq_2	H11_clonotype763	1	TRB:CASSLGLGIDTQYF;TRA:CAASNSNNRLTL
clone_1127_seq_2	H11_clonotype765	1	TRB:CASSSPWGRQNTLYF;TRA:CALETNYGNEKITF
clone_1128_seq_2	H11_clonotype766	1	TRB:CASSQEQGVAETLYF;TRA:CAAGGTGSNRLTF
clone_1129_seq_2	H11_clonotype767	1	TRB:CASSQVGKNYAEQFF;TRA:CAASKSNYNVLYF
clone_1130_seq_2	H11_clonotype769	1	TRB:CASSLNKITEVFF;TRA:CVLGDSSGSWQLIF
clone_1131_seq_2	H11_clonotype770	1	TRB:CASSLEGSSDYTF;TRA:CALRGSNTNKVVF
clone_1132_seq_2	H11_clonotype771	1	TRB:CASSLGANTEVFF;TRA:CAASAGSGGKLTL
clone_1133_seq_2	H11_clonotype773	1	TRB:CASSLATNTEVFF;TRA:CAASLSGGSNAKLTF
clone_1134_seq_2	H11_clonotype774	1	TRB:CASSFRVGTEVFF;TRA:CAASARNNNAPRF
clone_1135_seq_2	H11_clonotype775	1	TRB:CASNTGGSERLFF;TRA:CAAPVGDNSKLIW
clone_1136_seq_2	H11_clonotype776	1	TRB:CASSYGHYAEQFF;TRA:CAVSDQGGSAKLIF
clone_1137_seq_2	H11_clonotype777	1	TRB:CASSQEEGRAEQFF;TRA:CAASPVTGSGGKLTL
clone_1138_seq_2	H11_clonotype778	1	TRB:CASSAGTGGDTQYF;TRA:CAARSSGSWQLIF
clone_1139_seq_2	H11_clonotype779	1	TRB:CASSVWGGDNTLYF;TRA:CAVSMGYNQGKLIF
clone_1140_seq_2	H11_clonotype782	1	TRB:CASSLNRGVTEVFF;TRA:CAVSASSGSWQLIF
clone_1141_seq_2	H11_clonotype783	1	TRB:CASSQELGGRAEQFF;TRA:CALGGNTGNYKYVF
clone_1142_seq_2	H11_clonotype784	1	TRB:CASSQEWTANTEVFF;TRA:CAARDDTNAYKVIF
clone_1143_seq_2	H11_clonotype786	1	TRB:CASSQDRGGLAEQFF;TRA:CALSDRSNNRIFF
clone_1144_seq_2	H11_clonotype787	1	TRB:CASSQGGASGNTLYF;TRA:CAVGGGSALGRLHF
clone_1145_seq_2	H11_clonotype788	1	TRB:CAWSPGLGGSQNTLYF;TRA:CAMRDWNNNAPRF
clone_1146_seq_2	H11_clonotype789	1	TRB:CASSPQGIGNTLYF;TRB:CASSSGHNQAPLF;TRA:CAVRPSSGSWQLIF
clone_1147_seq_2	H11_clonotype790	1	TRB:CASSLGQNSDYTF;TRA:CAARATSSGQKLVF
clone_1148_seq_2	H11_clonotype791	1	TRB:CASSLGSQNTLYF;TRA:CAVSAIYGSSGNKLIF
clone_1149_seq_2	H11_clonotype792	1	TRB:CASSLGAYAEQFF;TRA:CALVPNTGYQNFYF
clone_1150_seq_2	H11_clonotype793	1	TRB:CASSLDSQNTLYF;TRA:CAVSSASSGSWQLIF
clone_1151_seq_2	H11_clonotype794	1	TRB:CASSDAGGYNSPLYF;TRA:CAASKTGNTGKLIF
clone_1152_seq_2	H11_clonotype795	1	TRB:CASSGTGGNYAEQFF;TRB:CASSPTGGQDTQYF;TRA:CAVSPNNYAQGLTF
clone_1153_seq_2	H11_clonotype796	1	TRB:CASSDSRDWVSYEQYF;TRA:CALSPQGGRALIF
clone_1154_seq_2	H11_clonotype797	1	TRB:CASSYYGGADEQYF;TRA:CAVRSNTGYQNFYF
clone_1155_seq_2	H11_clonotype798	1	TRB:CASSLARARAEVFF;TRA:CAASVGVGDNSKLIW
clone_1156_seq_2	H11_clonotype799	1	TRB:CASSLGGQGYEQYF;TRA:CVVGDRGSALGRLHF
clone_1157_seq_2	H11_clonotype800	1	TRB:CASSQSRGRQNTLYF;TRA:CALSDRPGNTGKLIF
clone_1158_seq_2	H11_clonotype802	1	TRB:CASSQGWGGEDTQYF;TRA:CALSDWAGNYKYVF
clone_1159_seq_2	H11_clonotype803	1	TRB:CASSLGNQDTQYF;TRA:CALSESNMGYKLTF
clone_1160_seq_2	H11_clonotype804	1	TRB:CASSDRGLSGNTLYF;TRA:CALGATSGGNYKPTF
clone_1161_seq_2	H11_clonotype805	1	TRB:CASGDARTFPYEQYF;TRA:CVVGDRGSALGRLHF
clone_1162_seq_2	H11_clonotype806	1	TRB:CASSQDRENSDYTF;TRA:CALGEINTGNYKYVF
clone_1163_seq_2	H11_clonotype807	1	TRB:CASSQDSANTEVFF;TRA:CAVSTNTEGADRLTF
clone_1164_seq_2	H11_clonotype808	1	TRB:CASSQAGGAREQYF;TRA:CVLSEGNQGGSAKLIF
clone_1165_seq_2	H11_clonotype809	1	TRB:CSSSQDRQDTQYF;TRA:CALSDLNYNQGKLIF
clone_1166_seq_2	H11_clonotype810	1	TRB:CASSQEGANTGQLYF;TRA:CAMRVITGNTGKLIF
clone_1167_seq_2	H11_clonotype811	1	TRB:CASSQDGNSGNTLYF;TRA:CAASEVATGGNNKLTF
clone_1168_seq_2	H11_clonotype812	1	TRB:CASSSGTEYEQYF;TRA:CAMREGQYNQGKLIF
clone_1169_seq_2	H11_clonotype813	1	TRB:CASRWTGNTEVFF;TRA:CAMRDSSGSWQLIF
clone_1170_seq_2	H11_clonotype814	1	TRB:CASSPGGYAEQFF;TRA:CAMREGDTGNYKYVF
clone_1171_seq_2	H11_clonotype815	1	TRB:CASSEFNSYNSPLYF;TRA:CALSVGYGSSGNKLIF
clone_1172_seq_2	H11_clonotype816	1	TRB:CASSQVSNTGQLYF;TRA:CAMRETSNTNKVVF
clone_1173_seq_2	H11_clonotype817	1	TRB:CASSRRDWGYEQYF;TRA:CAASKNYGSSGNKLIF
clone_1174_seq_2	H11_clonotype818	1	TRB:CASSLNWVREQYF;TRA:CAMRVDSGGSNYKLTF
clone_1175_seq_2	H11_clonotype819	1	TRB:CASSQTDRGYEQYF;TRA:CALGDRGTGANTGKLTF
clone_1176_seq_2	H11_clonotype820	1	TRB:CASSSGTGSGNTLYF;TRA:CAMREGVSGSFNKLTF
clone_1177_seq_2	H11_clonotype821	1	TRB:CASSHGTAAEQFF;TRA:CAASSYGNEKITF
clone_1178_seq_2	H11_clonotype822	1	TRB:CASSRRQNTEVFF;TRA:CAARDYSNNRLTL
clone_1179_seq_2	H11_clonotype823	1	TRB:CASSDLGGSAETLYF;TRA:CAASDTNAYKVIF
clone_1180_seq_2	H11_clonotype824	1	TRB:CASSAGGGNTGQLYF;TRA:CAAPSSFSKLVF
clone_1181_seq_2	H11_clonotype826	1	TRB:CASSLGENTEVFF;TRA:CAASDQGGSAKLIF
clone_1182_seq_2	H11_clonotype829	1	TRB:CASSFGVLYEQYF;TRA:CALSDNNNAGAKLTF
clone_1183_seq_2	H11_clonotype830	1	TRA:CAGETGGNNKLTF
clone_1184_seq_2	H11_clonotype831	1	TRA:CAASEHSNMGYKLTF
clone_1185_seq_2	H11_clonotype832	1	TRB:CASRVQGQAPLF
clone_1186_seq_2	H11_clonotype833	1	TRB:CASSIYNSEVFF
clone_1187_seq_2	H11_clonotype834	1	TRA:CAVSGPNTGKLTF
clone_1188_seq_2	H11_clonotype835	1	TRA:CAVSGPNTGKLTF
clone_1189_seq_2	H11_clonotype836	1	TRA:CAARKGGSAKLIF
clone_1190_seq_2	H11_clonotype837	1	TRB:CASSSGTANTGQLYF
clone_1191_seq_2	H11_clonotype838	1	TRB:CASSFSGTGDTEVFF
clone_1192_seq_2	H11_clonotype839	1	TRB:CASSTTGGGNYAEQFF
clone_1193_seq_2	H11_clonotype840	1	TRB:CASSQEGTGLAETLYF
clone_1194_seq_2	H11_clonotype841	1	TRB:CASSQEGRTGGGEQYF
clone_1195_seq_2	H11_clonotype843	1	TRB:CASSQEGRTGGGEQYF
clone_1196_seq_2	H11_clonotype844	1	TRB:CASSQEGRTGGGEQYF
clone_1197_seq_2	H11_clonotype845	1	TRB:CASSQEGGNNYAEQFF
clone_1198_seq_2	H11_clonotype846	1	TRB:CASSQEGGNNYAEQFF
clone_1199_seq_2	H11_clonotype848	1	TRB:CASSQDRGFSNERLFF
clone_1200_seq_2	H11_clonotype850	1	TRB:CASSQGTGGYNSPLYF
clone_1201_seq_2	H11_clonotype851	1	TRB:CASSRLGGRSSYEQYF
clone_1202_seq_2	H11_clonotype852	1	TRB:CASSRWGLGGQDTQYF
clone_1203_seq_2	H11_clonotype853	1	TRB:CASSRWGLGGQDTQYF
clone_1204_seq_2	H11_clonotype854	1	TRA:CAVSAATGYQNFYF
clone_1205_seq_2	H11_clonotype855	1	TRA:CALGSSNTNKVVF
clone_1206_seq_2	H11_clonotype856	1	TRA:CALGRNSNNRIFF
clone_1207_seq_2	H11_clonotype857	1	TRB:CASSPNRNTGQLYF
clone_1208_seq_2	H11_clonotype858	1	TRB:CASSPNRNTGQLYF
clone_1209_seq_2	H11_clonotype859	1	TRB:CASSPNRNTGQLYF
clone_1210_seq_2	H11_clonotype860	1	TRB:CASSLESANSDYTF
clone_1211_seq_2	H11_clonotype861	1	TRB:CASSLGTGGYEQYF
clone_1212_seq_2	H11_clonotype862	1	TRB:CASSSQGAVNTQYF
clone_1213_seq_2	H11_clonotype863	1	TRB:CASSSTGRGDTQYF
clone_1214_seq_2	H11_clonotype864	1	TRB:CASSLDRGNSDYTF
clone_1215_seq_2	H11_clonotype865	1	TRB:CASSLDWSQNTLYF
clone_1216_seq_2	H11_clonotype866	1	TRB:CASSLARDIYEQYF
clone_1217_seq_2	H11_clonotype867	1	TRB:CASSLGGGEDTQYF
clone_1218_seq_2	H11_clonotype868	1	TRB:CASSLVGTENTLYF
clone_1219_seq_2	H11_clonotype869	1	TRB:CASSFDNNQDTQYF
clone_1220_seq_2	H11_clonotype871	1	TRB:CASSRGQGSGNTLYF
clone_1221_seq_2	H11_clonotype872	1	TRB:CASSRGQGSGNTLYF
clone_1222_seq_2	H11_clonotype873	1	TRB:CASSSRDRDTEVFF
clone_1223_seq_2	H11_clonotype874	1	TRB:CASSSGQGDERLFF
clone_1224_seq_2	H11_clonotype875	1	TRB:CASSLDHSGNTLYF
clone_1225_seq_2	H11_clonotype876	1	TRB:CASSLDRGQYEQYF
clone_1226_seq_2	H11_clonotype877	1	TRB:CASSLWTIQNTLYF
clone_1227_seq_2	H11_clonotype879	1	TRB:CASRTGVSAETLYF
clone_1228_seq_2	H11_clonotype881	1	TRB:CASSLGGAATEVFF
clone_1229_seq_2	H11_clonotype882	1	TRB:CASSLGGAATEVFF
clone_1230_seq_2	H11_clonotype883	1	TRB:CASSHRGLNTEVFF
clone_1231_seq_2	H11_clonotype884	1	TRB:CASSLWTGGDEQYF
clone_1232_seq_2	H11_clonotype887	1	TRB:CASRGLGGRGEQYF
clone_1233_seq_2	H11_clonotype888	1	TRB:CASSPGHLYAEQFF
clone_1234_seq_2	H11_clonotype889	1	TRB:CASGDGPGQANTEVFF
clone_1235_seq_2	H11_clonotype890	1	TRB:CASRPLQGANTEVFF
clone_1236_seq_2	H11_clonotype891	1	TRB:CASSQAGASAETLYF
clone_1237_seq_2	H11_clonotype892	1	TRB:CASSQAGASAETLYF
clone_1238_seq_2	H11_clonotype893	1	TRB:CASGRGGVVAETLYF
clone_1239_seq_2	H11_clonotype894	1	TRB:CSSSTGLGEDTQYF
clone_1240_seq_2	H11_clonotype895	1	TRB:CTCSADGGDEQYF
clone_1241_seq_2	H11_clonotype897	1	TRB:CASSFWDWGYEQYF;TRA:CASSNNRIFF
clone_1242_seq_2	H11_clonotype898	1	TRB:CASSFGGNTGQLYF;TRB:CASSQVTANQDTQYF;TRA:CAPASSGSWQLIF;TRA:CILQGTGSKLSF
clone_1243_seq_2	H11_clonotype900	1	TRB:CASSSGTGGWEQYF;TRA:CALSSNTNKVVF
clone_1244_seq_2	H11_clonotype901	1	TRB:CASSPDGSSYEQYF;TRA:CALELYAQGLTF
clone_1245_seq_2	H11_clonotype902	1	TRB:CASSQTGTGWNTLYF;TRA:CILRVNTGNYKYVF
clone_1246_seq_2	H11_clonotype903	1	TRB:CTCSAGGGSEVFF;TRA:CAATDTNAYKVIF;TRA:CADNTNTGKLTF
clone_1247_seq_2	H11_clonotype904	1	TRB:CASRTGQTEVFF;TRA:CAAEAGGGYKVVF
clone_1248_seq_2	H11_clonotype905	1	TRB:CASSQVWGGNYAEQFF;TRA:CATDANTNTGKLTF
clone_1249_seq_2	H11_clonotype906	1	TRB:CASSPGTGGYEQYF;TRA:CVLSYNRIFF
clone_1250_seq_2	H11_clonotype907	1	TRB:CASSYGTGRETLYF;TRA:CAASTGNTGKLIF
clone_1251_seq_2	H11_clonotype908	1	TRB:CASSSRGENTEVFF;TRA:CAIDPASSSFSKLVF;TRA:CTGRVEGADRLTF
clone_1252_seq_2	H11_clonotype909	1	TRB:CASSGDWGGYEQYF;TRA:CAIDRTGGYKVVF
clone_1253_seq_2	H11_clonotype911	1	TRB:CASSFEGGRNTLYF;TRA:CAVANTNKVVF;TRA:CAVSLMNYNQGKLIF
clone_1254_seq_2	H11_clonotype912	1	TRB:CASSFGTGTERLFF;TRA:CILRVTNTGYQNFYF
clone_1255_seq_2	H11_clonotype914	1	TRB:CASGQGTGQLYF;TRB:CASSPDWVNQDTQYF;TRA:CAASPNYGNEKITF;TRA:CALGSSGSWQLIF
clone_1256_seq_2	H11_clonotype915	1	TRB:CTCSAPTAETLYF;TRA:CAPRNNYAQGLTF
clone_1257_seq_2	H11_clonotype916	1	TRB:CASSHRTGGNYAEQFF;TRA:CASMNYNQGKLIF;TRA:CATDNYAQGLTF
clone_1258_seq_2	H11_clonotype917	1	TRB:CASSPRADTGQLYF;TRA:CALERGNAGAKLTF
clone_1259_seq_2	H11_clonotype918	1	TRB:CASSLAGTNERLFF;TRA:CATPLTGGNNKLTF
clone_1260_seq_2	H11_clonotype919	1	TRB:CASSLAGSAETLYF;TRA:CAMGSNTNKVVF
clone_1261_seq_2	H11_clonotype920	1	TRB:CASSLTGGSYEQYF;TRA:CAASSGSWQLIF
clone_1262_seq_2	H11_clonotype921	1	TRB:CASSLWGSGTEVFF;TRB:CASSPPWGGNYAEQFF;TRA:CAADPLDYANKMIF;TRA:CAVRLSGGSNAKLTF
clone_1263_seq_2	H11_clonotype922	1	TRB:CASSPGHLYAEQFF;TRA:CVLVGDNSKLIW
clone_1264_seq_2	H11_clonotype923	1	TRB:CASSRTGNSAETLYF;TRB:CASSTGTGGGQNTLYF;TRA:CAAELMSNYNVLYF;TRA:CAVSSDRGSALGRLHF
clone_1265_seq_2	H11_clonotype924	1	TRB:CASSVDWGGSSYEQYF;TRA:CAIDHDTGNYKYVF
clone_1266_seq_2	H11_clonotype926	1	TRB:CASSQTGVSAETLYF;TRA:CAAEPMSNYNVLYF
clone_1267_seq_2	H11_clonotype927	1	TRB:CASSYWGERQNTLYF;TRA:CAAEGGFASALTF;TRA:CAGSTGGNNKLTF
clone_1268_seq_2	H11_clonotype928	1	TRB:CTCSGWDQNTLYF;TRA:CAFTGSGGKLTL
clone_1269_seq_2	H11_clonotype929	1	TRB:CASSRTGGGYEQYF;TRA:CALGRGAGSGGKLTL;TRA:CALWEPNTGYQNFYF
clone_1270_seq_2	H11_clonotype930	1	TRB:CASSLTISNERLFF;TRA:CAARGSALGRLHF
clone_1271_seq_2	H11_clonotype931	1	TRB:CASSLLGGAETLYF;TRA:CAVSAYGNEKITF
clone_1272_seq_2	H11_clonotype932	1	TRB:CASSLGLGENTLYF;TRA:CAVMNYNQGKLIF
clone_1273_seq_2	H11_clonotype933	1	TRB:CASSLVWGGAEQYF;TRA:CATLNTGYQNFYF
clone_1274_seq_2	H11_clonotype934	1	TRB:CASSFGTGNQAPLF;TRA:CAASGTNTGKLTF
clone_1275_seq_2	H11_clonotype935	1	TRB:CASSRGRAPNERLFF;TRA:CATETSSGQKLVF
clone_1276_seq_2	H11_clonotype936	1	TRB:CASSRVAGGQDTQYF;TRA:CAVSMRSNNRIFF
clone_1277_seq_2	H11_clonotype937	1	TRB:CATGGGDRGWEQYF;TRA:CALWEPNYAQGLTF;TRA:CVLSGGGRALIF
clone_1278_seq_2	H11_clonotype938	1	TRB:CASSRTGGANTGQLYF;TRB:CASSSLGTPDTQYF;TRA:CAVRDYAQGLTF;TRA:CAVSMESNYQLIW
clone_1279_seq_2	H11_clonotype939	1	TRB:CASSLQDSGNTLYF;TRA:CAADMATGGNNKLTF;TRA:CVVGANQGGSAKLIF
clone_1280_seq_2	H11_clonotype940	1	TRB:CASSRDRGGSDYTF;TRA:CATDAGSNNRIFF
clone_1281_seq_2	H11_clonotype942	1	TRB:CASSGGLGGGSAETLYF;TRA:CAARGYNQGKLIF;TRA:CALGGQLSGSFNKLTF
clone_1282_seq_2	H11_clonotype943	1	TRB:CASSQEGPNYAEQFF;TRA:CALTGYKLTF
clone_1283_seq_2	H11_clonotype945	1	TRB:CASSQTGRANTEVFF;TRA:CAVSAANKMIF
clone_1284_seq_2	H11_clonotype946	1	TRB:CASSSMGYEQYF;TRA:CAVSTSSGSWQLIF
clone_1285_seq_2	H11_clonotype947	1	TRB:CASSLGGHGQDTQYF;TRA:CALGESNNRIFF
clone_1286_seq_2	H11_clonotype948	1	TRB:CASSQDFWASAETLYF;TRA:CAVRYNTNTGKLTF
clone_1287_seq_2	H11_clonotype950	1	TRB:CASSLFLGGYAEQFF;TRB:CASSNRGRDTEVFF;TRA:CAMRGNTGYQNFYF;TRA:CAVSASYNQGKLIF
clone_1288_seq_2	H11_clonotype951	1	TRB:CASSPGDSGNTLYF;TRA:CADTNAYKVIF
clone_1289_seq_2	H11_clonotype953	1	TRB:CASSLHKNNQAPLF;TRA:CAVSAEGSNAKLTF
clone_1290_seq_2	H11_clonotype954	1	TRB:CASSSDRENTEVFF;TRA:CAARHYANKMIF
clone_1291_seq_2	H11_clonotype955	1	TRB:CASSFYRGAETLYF;TRA:CALSDHDANKMIF;TRA:CAVSMNSNNRIFF
clone_1292_seq_2	H11_clonotype956	1	TRB:CASSGTSSAETLYF;TRA:CAASEHSNMGYKLTF;TRA:CAMGYNTNTGKLTF
clone_1293_seq_2	H11_clonotype958	1	TRB:CTCSGRSGYEQYF;TRA:CALSLTGNTGKLIF
clone_1294_seq_2	H11_clonotype959	1	TRB:CTCGGQGPERLFF;TRA:CAVRPNTGYQNFYF
clone_1295_seq_2	H11_clonotype961	1	TRB:CASSQEGRTGRAEQFF;TRA:CAASLNNNNAPRF
clone_1296_seq_2	H11_clonotype963	1	TRB:CASTPGLIQDTQYF;TRA:CAATNSAGNKLTF
clone_1297_seq_2	H11_clonotype964	1	TRB:CASRPGVSNERLFF;TRA:CAVSSTGGNNKLTF
clone_1298_seq_2	H11_clonotype966	1	TRB:CASSPAGLGYEQYF;TRA:CAVSAGGNNRLTL
clone_1299_seq_2	H11_clonotype968	1	TRB:CASSSPGTAYEQYF;TRA:CAVSASSNNRIFF
clone_1300_seq_2	H11_clonotype970	1	TRB:CASSPGTGGDTQYF;TRA:CALSGSNTNKVVF
clone_1301_seq_2	H11_clonotype971	1	TRB:CASSFWGGSYEQYF;TRA:CALSRSNNRIFF
clone_1302_seq_2	H11_clonotype972	1	TRB:CASNRDWGYEQYF;TRB:CASRPTGLNTEVFF;TRA:CSASRTNTGKLTF
clone_1303_seq_2	H11_clonotype974	1	TRB:CASSGGLGANTGQLYF;TRA:CALSSNNNAPRF
clone_1304_seq_2	H11_clonotype975	1	TRB:CASSQEGQGGATQYF;TRA:CALGYNAGAKLTF
clone_1305_seq_2	H11_clonotype976	1	TRB:CASSMGAETLYF;TRA:CVLRIASSSFSKLVF
clone_1306_seq_2	H11_clonotype977	1	TRB:CASSHGGGSNTGQLYF;TRB:CASSPRDRGRDTQYF;TRA:CAASSGGSNYKLTF;TRA:CALEGKSNAGAKLTF
clone_1307_seq_2	H11_clonotype979	1	TRB:CASSFDREGSDYTF;TRA:CVLSHYGSSGNKLIF
clone_1308_seq_2	H11_clonotype980	1	TRB:CASSEEGNQDTQYF;TRA:CAVSMGTTASLGKLQF
clone_1309_seq_2	H11_clonotype981	1	TRB:CASSLGGQGGEVFF;TRA:CAASGSSGSWQLIF
clone_1310_seq_2	H11_clonotype982	1	TRB:CASSLSKGVTEVFF;TRA:CAVSHNTNTGKLTF
clone_1311_seq_2	H11_clonotype983	1	TRB:CASSLLLGQNTLYF;TRA:CAMVLNSGGSNAKLTF;TRA:CAVSAGGSNAKLTF
clone_1312_seq_2	H11_clonotype984	1	TRB:CASSLWDRGHEQYF;TRA:CALVDRSNNRIFF
clone_1313_seq_2	H11_clonotype985	1	TRB:CASRLGGNTGQLYF;TRA:CALEGHVGDNSKLIW
clone_1314_seq_2	H11_clonotype986	1	TRB:CASSLLGGAREQYF;TRA:CALRSPLTGSGGKLTL
clone_1315_seq_2	H11_clonotype987	1	TRB:CASSFGTANERLFF;TRA:CALKTQVVGQLTF
clone_1316_seq_2	H11_clonotype988	1	TRB:CASSQEGRTDNQAPLF;TRB:CTCSANYNSPLYF;TRA:CALRRGSSGNKLIF;TRA:CAMRDTNNNAPRF
clone_1317_seq_2	H11_clonotype989	1	TRB:CASSFWVSGNTLYF;TRB:CASSQEGGGNAETLYF;TRA:CAVSEGSSGSWQLIF
clone_1318_seq_2	H11_clonotype990	1	TRB:CASSLDWANQDTQYF;TRB:CASSQAQGARQNTLYF;TRA:CALSASSGSWQLIF
clone_1319_seq_2	H11_clonotype994	1	TRB:CASSWGGLGAEQFF;TRA:CAVSLNYGSSGNKLIF
clone_1320_seq_2	H11_clonotype995	1	TRB:CASSPDWGGGSAETLYF;TRA:CVVGDRGSALGRLHF
clone_1321_seq_2	H11_clonotype996	1	TRB:CASSQDGQGGIDYTF;TRA:CAVSELNTGANTGKLTF
clone_1322_seq_2	H11_clonotype997	1	TRB:CASSQDWGNYAEQFF;TRA:CALGNSNTGYQNFYF
clone_1323_seq_2	H11_clonotype998	1	TRB:CASSPGLGGVETLYF;TRA:CAVSRNTGGLSGKLTF
clone_1324_seq_2	H11_clonotype999	1	TRB:CTCSPRGNTEVFF;TRA:CALNTGANTGKLTF

## Sheet: PD1KO1
Tcell_clone_rank	clonotype_id	count	cdr3s_aa
clone_1_seq_2	H11_PD1_KO_clonotype1	390	TRB:CASSLTGGSEQYF;TRA:CAVSPDTNAYKVIF
clone_2_seq_2	H11_PD1_KO_clonotype2	148	TRB:CASSSGLGGRGQFF;TRA:CAVRYTNTGKLTF
clone_3_seq_2	H11_PD1_KO_clonotype3	132	TRB:CASGDWGDAEQFF;TRA:CAVPRNSNNRIFF
clone_4_seq_2	H11_PD1_KO_clonotype4	107	TRB:CASSSGQGAGNTLYF;TRA:CAVSMLSTNAYKVIF;TRA:CVLGDLTGNTGKLIF
clone_5_seq_2	H11_PD1_KO_clonotype5	66	TRB:CASSETGGNSGNTLYF;TRA:CAMSNTNTGKLTF;TRA:CAVRTNSGTYQRF
clone_6_seq_2	H11_PD1_KO_clonotype6	52	TRB:CASSLTGKDTQYF;TRA:CAVRTSGGNYKPTF
clone_7_seq_2	H11_PD1_KO_clonotype7	47	TRB:CASSLGGAVAETLYF;TRA:CAAEALSNYNVLYF;TRA:CAVSGSGTYQRF
clone_8_seq_2	H11_PD1_KO_clonotype8	42	TRB:CASGEQGRSAETLYF;TRA:CAAEAWANYNVLYF;TRA:CAVSSAYKVIF
clone_9_seq_2	H11_PD1_KO_clonotype10	36	TRB:CASSLGQGALAPLF;TRA:CVLSARTSGGNYKPTF
clone_10_seq_2	H11_PD1_KO_clonotype11	35	TRB:CASSRQGSSAETLYF;TRA:CAAEAWSGYNKLTF
clone_11_seq_2	H11_PD1_KO_clonotype9	35	TRB:CASSLLGGRQNTLYF;TRA:CAVSSLPGTGSNRLTF
clone_12_seq_2	H11_PD1_KO_clonotype12	32	TRB:CASSQDGRTGDERLFF;TRA:CAAVRNNNNAPRF
clone_13_seq_2	H11_PD1_KO_clonotype13	31	TRB:CASSPPWGGYEQYF;TRA:CALVPNTNKVVF
clone_14_seq_2	H11_PD1_KO_clonotype14	31	TRB:CASSQEGRTGSYEQYF;TRA:CAASANNNNAPRF
clone_15_seq_2	H11_PD1_KO_clonotype15	31	TRB:CASSLGRRSQNTLYF;TRA:CAVRVTGSGGKLTL
clone_16_seq_2	H11_PD1_KO_clonotype16	30	TRB:CASSLWGNNQAPLF;TRA:CALSDRGSSGNKLIF
clone_17_seq_2	H11_PD1_KO_clonotype17	26	TRB:CASSDGGAETLYF;TRA:CALGVYGSSGNKLIF
clone_18_seq_2	H11_PD1_KO_clonotype22	25	TRB:CASSLGRRSQNTLYF
clone_19_seq_2	H11_PD1_KO_clonotype23	25	TRB:CTCSAEVAQNTLYF;TRA:CAASAGNSNNRIFF;TRA:CALSLSNYNVLYF
clone_20_seq_2	H11_PD1_KO_clonotype18	24	TRB:CASSQEGRTGGPGQLYF;TRA:CALPPNNNNAPRF
clone_21_seq_2	H11_PD1_KO_clonotype19	24	TRB:CTCSSGGSYAEQFF;TRA:CALITGGSNAKLTF
clone_22_seq_2	H11_PD1_KO_clonotype21	24	TRB:CASSQETGGISYEQYF;TRA:CAASMPNYNVLYF;TRA:CAVSADGSSGNKLIF
clone_23_seq_2	H11_PD1_KO_clonotype20	23	TRB:CASSQGLGGREQYF;TRA:CALSPNSGGSNAKLTF
clone_24_seq_2	H11_PD1_KO_clonotype24	22	TRB:CASSQEGANTEVFF;TRA:CALERGYGNEKITF
clone_25_seq_2	H11_PD1_KO_clonotype26	20	TRB:CASSPLGNSQNTLYF;TRA:CAVSMGNYNQGKLIF
clone_26_seq_2	H11_PD1_KO_clonotype27	19	TRB:CARGQESNERLFF;TRB:CGAGTGGYEQYF;TRA:CAMREGEGGSAKLIF
clone_27_seq_2	H11_PD1_KO_clonotype29	19	TRB:CASSEWVNTGQLYF;TRA:CAVSGETSSFSKLVF
clone_28_seq_2	H11_PD1_KO_clonotype31	19	TRB:CTCSHRGGNQAPLF;TRA:CAGASSGSWQLIF
clone_29_seq_2	H11_PD1_KO_clonotype30	18	TRB:CASSDGRGQNTLYF;TRA:CALGEGTGSNRLTF;TRA:CAMRGGYNQGKLIF;TRA:CAMRGGYNQGKLIF
clone_30_seq_2	H11_PD1_KO_clonotype25	17	TRB:CASSLDRGEVFF;TRA:CAIDHNTGKLTF
clone_31_seq_2	H11_PD1_KO_clonotype28	17	TRB:CASSQDPGAGQLYF;TRA:CAIYVTGSGGKLTL;TRA:CILRVVGANTGKLTF
clone_32_seq_2	H11_PD1_KO_clonotype33	17	TRA:CAVSPDTNAYKVIF
clone_33_seq_2	H11_PD1_KO_clonotype34	15	TRB:CASSGHNQDTQYF;TRA:CAVTRESNYNVLYF
clone_34_seq_2	H11_PD1_KO_clonotype36	14	TRB:CASSYGGTSAETLYF;TRA:CAAEYMSNYNVLYF;TRA:CAVSMTNSAGNKLTF
clone_35_seq_2	H11_PD1_KO_clonotype32	13	TRB:CASSLEQNTEVFF;TRA:CAAGTGYQNFYF
clone_36_seq_2	H11_PD1_KO_clonotype35	13	TRB:CASSLEGGLFEQYF
clone_37_seq_2	H11_PD1_KO_clonotype37	13	TRB:CTCSAEGQGKNTLYF;TRA:CALWELPMSNYNVLYF;TRA:CAPLPTSSGQKLVF
clone_38_seq_2	H11_PD1_KO_clonotype39	13	TRB:CASSLEYEQYF;TRA:CAASAGGNNKLTF
clone_39_seq_2	H11_PD1_KO_clonotype41	12	TRB:CASSHRDRGYEQYF;TRA:CAMESQGGRALIF
clone_40_seq_2	H11_PD1_KO_clonotype38	11	TRB:CASSQGTGIGNTLYF;TRA:CALRGTGGYKVVF
clone_41_seq_2	H11_PD1_KO_clonotype42	11	TRB:CASSSLGVYAEQFF;TRA:CAVSDNYAQGLTF
clone_42_seq_2	H11_PD1_KO_clonotype44	11	TRB:CASSDPPRGYNNQAPLF;TRB:CTCSAEVAQNTLYF;TRA:CALGDSNYQLIW
clone_43_seq_2	H11_PD1_KO_clonotype47	11	TRB:CASSLEDANTEVFF;TRB:CASSLTGGTQNTLYF;TRA:CAVSNMGYKLTF
clone_44_seq_2	H11_PD1_KO_clonotype40	10	TRB:CASSLGTEDTLYF;TRA:CAAEASGSWQLIF;TRA:CALGVNYNQGKLIF
clone_45_seq_2	H11_PD1_KO_clonotype43	10	TRB:CASSMGERLFF;TRA:CAASDYQGGRALIF;TRA:CALSDAQGGRALIF
clone_46_seq_2	H11_PD1_KO_clonotype45	10	TRB:CASGGTGGNYAEQFF;TRA:CAVRQMATGGNNKLTF
clone_47_seq_2	H11_PD1_KO_clonotype49	10	TRB:CASRQPGQGYAEQFF;TRA:CAMREGLGSNYQLIW
clone_48_seq_2	H11_PD1_KO_clonotype50	10	TRB:CASSETGGNSGNTLYF
clone_49_seq_2	H11_PD1_KO_clonotype51	10	TRB:CASSQDWGGQDTQYF;TRA:CAASEGGGSGGKLTL
clone_50_seq_2	H11_PD1_KO_clonotype53	9	TRB:CASSRTGTSQNTLYF;TRA:CAVSDLPGTGSNRLTF
clone_51_seq_2	H11_PD1_KO_clonotype56	9	TRB:CASGDARGGEQYF;TRA:CALSGTNSAGNKLTF
clone_52_seq_2	H11_PD1_KO_clonotype48	8	TRB:CASSLGGTEVFF;TRA:CAVRDTGYQNFYF
clone_53_seq_2	H11_PD1_KO_clonotype54	8	TRB:CASSLRLGGRGYAEQFF
clone_54_seq_2	H11_PD1_KO_clonotype60	8	TRB:CASSQEDWGGSYEQYF;TRA:CAVSADSNNRIFF
clone_55_seq_2	H11_PD1_KO_clonotype61	8	TRB:CASSFVGRSQNTLYF;TRA:CAGDMGYKLTF
clone_56_seq_2	H11_PD1_KO_clonotype46	7	TRB:CASSLRLGGRGYAEQFF;TRA:CAAADYSNNRLTL
clone_57_seq_2	H11_PD1_KO_clonotype55	7	TRB:CASSLGAGQDTQYF;TRA:CATDTNAYKVIF
clone_58_seq_2	H11_PD1_KO_clonotype57	7	TRB:CASSDGGNTGQLYF;TRA:CAASLYSNNRLTL
clone_59_seq_2	H11_PD1_KO_clonotype58	7	TRB:CASSLVLAETLYF;TRA:CAAYNTNTGKLTF
clone_60_seq_2	H11_PD1_KO_clonotype59	7	TRB:CASSQGGASAETLYF;TRA:CAAELMSNYNVLYF
clone_61_seq_2	H11_PD1_KO_clonotype62	7	TRB:CTCSAGRGHTEVFF;TRA:CARNTGANTGKLTF
clone_62_seq_2	H11_PD1_KO_clonotype65	7	TRB:CASSPLGGAEVFF;TRA:CARYNNNAPRF;TRA:CAVRNNAGAKLTF
clone_63_seq_2	H11_PD1_KO_clonotype66	7	TRB:CASSADRGRERLFF
clone_64_seq_2	H11_PD1_KO_clonotype67	7	TRB:CASSLDSPDTLYF;TRA:CAAHTNAYKVIF;TRA:CALGDRDYSNNRLTL
clone_65_seq_2	H11_PD1_KO_clonotype68	7	TRB:CASSLETNSDYTF;TRA:CAAIRNSNNRIFF
clone_66_seq_2	H11_PD1_KO_clonotype71	7	TRB:CASSLTGRSAETLYF;TRA:CAAEAMSNYNVLYF;TRA:CAVVQTGFASALTF
clone_67_seq_2	H11_PD1_KO_clonotype75	7	TRB:CASRPRLGEDTQYF;TRA:CAAPDTNAYKVIF
clone_68_seq_2	H11_PD1_KO_clonotype63	6	TRB:CASSDAAETLYF;TRA:CAVGNQGGSAKLIF
clone_69_seq_2	H11_PD1_KO_clonotype69	6	TRB:CASSDGGAYEQYF;TRB:CASSPGGREQYF;TRA:CAASEHAGDNSKLIW;TRA:CALWGNNNNAPRF
clone_70_seq_2	H11_PD1_KO_clonotype70	6	TRB:CASSQEGRTGSYEQYF
clone_71_seq_2	H11_PD1_KO_clonotype72	6	TRB:CASSQEGWGNTGQLYF;TRA:CAASEGGGGSAKLIF
clone_72_seq_2	H11_PD1_KO_clonotype73	6	TRB:CASSLEGGLFEQYF;TRA:CAMREGQGSNNRLTL
clone_73_seq_2	H11_PD1_KO_clonotype74	6	TRB:CASSLGRYEQYF;TRB:CAWSLRGSQNTLYF;TRA:CAASAMDYANKMIF
clone_74_seq_2	H11_PD1_KO_clonotype76	6	TRB:CASGDAQSNTEVFF;TRB:CASSEQNTEVFF;TRB:CASSLEQGGHTLYF;TRA:CALGNSGTYQRF
clone_75_seq_2	H11_PD1_KO_clonotype77	6	TRB:CASGDAGGRSAETLYF;TRA:CAARGSGGSNAKLTF;TRA:CAVEASSSFSKLVF
clone_76_seq_2	H11_PD1_KO_clonotype78	6	TRB:CASSLDRGEVFF
clone_77_seq_2	H11_PD1_KO_clonotype81	6	TRB:CASSLDSREQYF;TRB:CASSYTGGQNTLYF;TRA:CAVSAKNANKMIF
clone_78_seq_2	H11_PD1_KO_clonotype82	6	TRB:CASSIRAETLYF;TRA:CARMDYANKMIF
clone_79_seq_2	H11_PD1_KO_clonotype85	6	TRB:CASSADRGRERLFF;TRB:CASSLWTGLSNERLFF;TRB:CASSSPGTGKDTQYF;TRA:CALSAVDTNAYKVIF
clone_80_seq_2	H11_PD1_KO_clonotype86	6	TRB:CASSLGGGNTGQLYF;TRB:CASSPRDWGTDTQYF;TRA:CAVSAGGGLSGKLTF
clone_81_seq_2	H11_PD1_KO_clonotype101	5	TRB:CASSWTGQDTQYF;TRA:CAMREMQQGTGSKLSF
clone_82_seq_2	H11_PD1_KO_clonotype102	5	TRB:CASSWDNANSDYTF;TRA:CALELESNYQLIW
clone_83_seq_2	H11_PD1_KO_clonotype52	5	TRB:CTCSSGGSYAEQFF
clone_84_seq_2	H11_PD1_KO_clonotype79	5	TRB:CASSDAGGTGQLYF;TRB:CASSDRFSNERLFF;TRB:CASSQAPISQNTLYF;TRA:CAVRATGYQNFYF
clone_85_seq_2	H11_PD1_KO_clonotype80	5	TRB:CASTSGLGGYEQYF;TRA:CAASNTGYQNFYF
clone_86_seq_2	H11_PD1_KO_clonotype83	5	TRB:CASSLEGRNTEVFF;TRA:CAVRSSSFSKLVF
clone_87_seq_2	H11_PD1_KO_clonotype84	5	TRB:CASSPSWGGYEQYF;TRA:CALEMGNNRIFF
clone_88_seq_2	H11_PD1_KO_clonotype87	5	TRB:CASSDGDTQYF;TRA:CAFDNNNAPRF;TRA:CALITGGSNAKLTF
clone_89_seq_2	H11_PD1_KO_clonotype88	5	TRB:CASSLEGAANTEVFF;TRB:CGARVGQSQNTLYF;TRA:CALSGGSNYNVLYF;TRA:CAPNSAGNKLTF
clone_90_seq_2	H11_PD1_KO_clonotype89	5	TRB:CASSGGAHAEQFF;TRB:CASSYYWGGDAEQFF;TRA:CAAAYQGGRALIF;TRA:CVVGPYGSSGNKLIF
clone_91_seq_2	H11_PD1_KO_clonotype90	5	TRB:CASSLVGGRTGQLYF;TRB:CASSPRDWGEEQYF;TRA:CAATSSGQKLVF
clone_92_seq_2	H11_PD1_KO_clonotype91	5	TRB:CGARDHGAPNERLFF;TRA:CAVSAWATGGNNKLTF
clone_93_seq_2	H11_PD1_KO_clonotype92	5	TRB:CAWSLQRDRGTERLFF;TRA:CAATGYQNFYF;TRA:CALRDTGNYKYVF;TRA:CAVRNNAGAKLTF
clone_94_seq_2	H11_PD1_KO_clonotype93	5	TRB:CASSSGTKDTQYF;TRA:CALGRNSNNRIFF;TRA:CAVRPGTGSNRLTF
clone_95_seq_2	H11_PD1_KO_clonotype94	5	TRB:CASSLGTGNDERLFF;TRA:CAVITTASLGKLQF
clone_96_seq_2	H11_PD1_KO_clonotype96	5	TRB:CASGAGQGPNERLFF;TRB:CASSLDWGNTGQLYF;TRB:CASSLGTGGSETLYF;TRA:CVLSDSNYQLIW
clone_97_seq_2	H11_PD1_KO_clonotype97	5	TRB:CASSSLRRSGNTLYF;TRB:CTCSTRTGGFAEQFF;TRA:CALSGATGGNNKLTF
clone_98_seq_2	H11_PD1_KO_clonotype98	5	TRB:CASSLRLGGRGYAEQFF;TRA:CAVSPDTNAYKVIF
clone_99_seq_2	H11_PD1_KO_clonotype99	5	TRB:CASGGTDQAPLF;TRA:CAARNSAGNKLTF
clone_100_seq_2	H11_PD1_KO_clonotype100	4	TRB:CASSWTGQDTQYF
clone_101_seq_2	H11_PD1_KO_clonotype103	4	TRB:CASREGNTLYF;TRA:CALGPSSGSWQLIF;TRA:CAVSDITGNTGKLIF
clone_102_seq_2	H11_PD1_KO_clonotype104	4	TRB:CGARDWINQDTQYF;TRA:CAASMWGGSALGRLHF
clone_103_seq_2	H11_PD1_KO_clonotype105	4	TRB:CASSLEGAANTEVFF;TRB:CGARVGQSQNTLYF;TRA:CALSGGSNYNVLYF
clone_104_seq_2	H11_PD1_KO_clonotype106	4	TRB:CASSTGDTQYF;TRA:CAASASSGSWQLIF
clone_105_seq_2	H11_PD1_KO_clonotype107	4	TRB:CASSPNNYAEQFF;TRA:CAMREANSNNRIFF
clone_106_seq_2	H11_PD1_KO_clonotype108	4	TRB:CASSRDINNQAPLF;TRA:CAAVYGSSGNKLIF
clone_107_seq_2	H11_PD1_KO_clonotype109	4	TRB:CAWSLGPSSAETLYF;TRB:CTCSAGRGHTEVFF;TRA:CAAEAPPGGNYKPTF
clone_108_seq_2	H11_PD1_KO_clonotype110	4	TRB:CASSASGHHNSPLYF;TRA:CAVSGAGNTGKLIF
clone_109_seq_2	H11_PD1_KO_clonotype111	4	TRB:CASRQPGQGYAEQFF;TRA:CAMREGLGSNYQLIW
clone_110_seq_2	H11_PD1_KO_clonotype112	4	TRB:CASSQEGGAGEQYF;TRA:CAMREGDYNQGKLIF
clone_111_seq_2	H11_PD1_KO_clonotype113	4	TRB:CASSLRTGGYEQYF;TRB:CATRQNSYNSPLYF;TRA:CATSASSGSWQLIF
clone_112_seq_2	H11_PD1_KO_clonotype115	4	TRB:CASSQEGRTANTEVFF;TRA:CAAIKNNNNAPRF
clone_113_seq_2	H11_PD1_KO_clonotype117	4	TRB:CASSQEGREDAETLYF;TRB:CAWSQTGGADTQYF;TRA:CAASASSSFSKLVF;TRA:CANYSGGSNAKLTF
clone_114_seq_2	H11_PD1_KO_clonotype118	4	TRB:CASSDRDWASAETLYF;TRB:CASSSGQYEQYF;TRB:CAWSTSSGNTLYF;TRA:CAVRNYNQGKLIF
clone_115_seq_2	H11_PD1_KO_clonotype119	4	TRB:CTCSAAFSGNTLYF;TRA:CAGLNYGSSGNKLIF
clone_116_seq_2	H11_PD1_KO_clonotype120	4	TRB:CASSWDSSNTGQLYF;TRB:CAWTGESDYTF;TRA:CAVSARTNKVVF
clone_117_seq_2	H11_PD1_KO_clonotype121	4	TRB:CASSQEGGAGEQYF;TRB:CTCSAGGRTGQLYF;TRA:CALTPGGSNAKLTF
clone_118_seq_2	H11_PD1_KO_clonotype122	4	TRB:CASSLGGGNTGQLYF;TRA:CAVSDSGYNKLTF
clone_119_seq_2	H11_PD1_KO_clonotype123	4	TRB:CASSYYWGGDAEQFF;TRA:CALGERNNNNAPRF
clone_120_seq_2	H11_PD1_KO_clonotype124	4	TRB:CASSLRDWGAGTGQLYF;TRA:CALGTGNTGKLIF;TRA:CAVNYLPGTGSNRLTF
clone_121_seq_2	H11_PD1_KO_clonotype125	4	TRB:CASSLMGQGAGNTLYF;TRA:CAASAADTNAYKVIF;TRA:CASNNAGAKLTF
clone_122_seq_2	H11_PD1_KO_clonotype126	4	TRB:CASSLTNQDTQYF;TRB:CASSPTGNEQYF;TRA:CATTTASLGKLQF
clone_123_seq_2	H11_PD1_KO_clonotype128	4	TRB:CASGDRDRNTEVFF;TRB:CASSFGVVNTEVFF;TRA:CAAEGVDSNYQLIW
clone_124_seq_2	H11_PD1_KO_clonotype129	4	TRB:CASSAPNSDYTF;TRB:CASSQTGGLGEQYF;TRA:CVSYNTNTGKLTF
clone_125_seq_2	H11_PD1_KO_clonotype64	4	TRB:CASSDAYNTLYF;TRA:CAAKDTGGNNKLTF
clone_126_seq_2	H11_PD1_KO_clonotype95	4	TRB:CTCSAGRGHTEVFF
clone_127_seq_2	H11_PD1_KO_clonotype114	3	TRB:CASSPRRHSDYTF;TRA:CAARLTGNTGKLIF;TRA:CALSELHNVGDNSKLIW
clone_128_seq_2	H11_PD1_KO_clonotype116	3	TRB:CASSQAGNSGNTLYF;TRA:CAAEFLSNYNVLYF;TRA:CAVRDRNYGSSGNKLIF
clone_129_seq_2	H11_PD1_KO_clonotype127	3	TRB:CASGDRGYGSDYTF;TRB:CASSRQFNERLFF;TRA:CAIDRPGGYKVVF
clone_130_seq_2	H11_PD1_KO_clonotype130	3	TRB:CASSPDWGGNYAEQFF;TRB:CASSPRDWGTDTQYF;TRA:CAVRRSGSWQLIF
clone_131_seq_2	H11_PD1_KO_clonotype131	3	TRB:CASSDGDTQYF;TRA:CAFDNNNAPRF
clone_132_seq_2	H11_PD1_KO_clonotype132	3	TRB:CASRQGTLYF;TRB:CTCSAGDTQYF;TRA:CAMGGGNNKLTF
clone_133_seq_2	H11_PD1_KO_clonotype133	3	TRB:CASSDGGGPDYTF;TRA:CAAEAASSGSWQLIF;TRA:CAIDLGGSNAKLTF
clone_134_seq_2	H11_PD1_KO_clonotype134	3	TRB:CASSGYAEQFF;TRB:CASSLSTNSAETLYF;TRA:CAVSVMSNYNVLYF
clone_135_seq_2	H11_PD1_KO_clonotype136	3	TRB:CASSQEGRNTEVFF;TRB:CASSSKNERLFF;TRA:CVLSYGSSGNKLIF
clone_136_seq_2	H11_PD1_KO_clonotype137	3	TRB:CASSLKGGEVFF;TRA:CAVSYYQGGRALIF
clone_137_seq_2	H11_PD1_KO_clonotype138	3	TRB:CASSQDWGRYEQYF;TRB:CASSQEGRTGSYEQYF;TRA:CAAAPGTGYQNFYF
clone_138_seq_2	H11_PD1_KO_clonotype141	3	TRB:CASSGGGYAEQFF;TRA:CAASDTEGADRLTF
clone_139_seq_2	H11_PD1_KO_clonotype142	3	TRB:CASSLEQNTEVFF;TRA:CAAGTGYQNFYF;TRA:CALSETNYGNEKITF
clone_140_seq_2	H11_PD1_KO_clonotype143	3	TRB:CASSFPGGYEQYF;TRA:CAAGGGSNAKLTF
clone_141_seq_2	H11_PD1_KO_clonotype144	3	TRB:CASSLTGRTEVFF;TRA:CAARATASLGKLQF
clone_142_seq_2	H11_PD1_KO_clonotype145	3	TRB:CASSLYSGNTLYF;TRA:CAASLNTGNYKYVF
clone_143_seq_2	H11_PD1_KO_clonotype146	3	TRB:CASSLNRRDTQYF;TRB:CASSRLGGGQDTQYF;TRA:CAVSPNNYAQGLTF
clone_144_seq_2	H11_PD1_KO_clonotype148	3	TRB:CTCSPRQTGQLYF;TRA:CALSEGANTGKLTF
clone_145_seq_2	H11_PD1_KO_clonotype149	3	TRB:CTCSAQGNSPLYF;TRA:CAASHNTNTGKLTF
clone_146_seq_2	H11_PD1_KO_clonotype151	3	TRB:CASSPQGDQDTQYF;TRA:CAVRDTNAYKVIF
clone_147_seq_2	H11_PD1_KO_clonotype152	3	TRB:CASSFDRLDTEVFF;TRB:CASSLEGGDAEQFF;TRB:CASSWTGQDTQYF;TRA:CAASANYNQGKLIF;TRA:CALKGGGGNYKPTF
clone_148_seq_2	H11_PD1_KO_clonotype153	3	TRB:CASSLEGGLFEQYF;TRA:CAMREGQGSNNRLTL
clone_149_seq_2	H11_PD1_KO_clonotype154	3	TRB:CASSQDGGWQNTLYF;TRA:CAMRENQGGSAKLIF
clone_150_seq_2	H11_PD1_KO_clonotype155	3	TRB:CASSQDGRTGNERLFF;TRA:CAATRNNNNAPRF
clone_151_seq_2	H11_PD1_KO_clonotype156	3	TRB:CASSRDRGGTGQLYF;TRA:CAASDYNQGKLIF
clone_152_seq_2	H11_PD1_KO_clonotype157	3	TRB:CASSLDGRGYEQYF;TRA:CAASERTTNAYKVIF
clone_153_seq_2	H11_PD1_KO_clonotype159	3	TRB:CASSRDAGGNYAEQFF;TRA:CAMRERNNYAQGLTF
clone_154_seq_2	H11_PD1_KO_clonotype160	3	TRB:CASSPGNQAPLF;TRA:CALSDSGGSNAKLTF
clone_155_seq_2	H11_PD1_KO_clonotype161	3	TRB:CASGDASANSDYTF;TRA:CALERNAGAKLTF
clone_156_seq_2	H11_PD1_KO_clonotype162	3	TRB:CASGDGGDNSPLYF;TRB:CASSSPGTGKDTQYF;TRA:CAAISSGSWQLIF
clone_157_seq_2	H11_PD1_KO_clonotype163	3	TRB:CASSFRDTYAEQFF;TRA:CAVDDTNAYKVIF
clone_158_seq_2	H11_PD1_KO_clonotype164	3	TRB:CASGDEGGALAEQFF;TRA:CAVRLMATGGNNKLTF
clone_159_seq_2	H11_PD1_KO_clonotype135	2	TRB:CASSSGTGYEQYF;TRA:CALRISANSGTYQRF
clone_160_seq_2	H11_PD1_KO_clonotype139	2	TRB:CTCSAGDTQYF;TRA:CAASLANYGNEKITF
clone_161_seq_2	H11_PD1_KO_clonotype140	2	TRB:CASSQGTGSSYEQYF;TRA:CALNRGSALGRLHF
clone_162_seq_2	H11_PD1_KO_clonotype147	2	TRB:CASNRDRGYAEQFF;TRA:CAVTPNTNTGKLTF
clone_163_seq_2	H11_PD1_KO_clonotype150	2	TRB:CASSTTGGAWAEQFF;TRA:CALGVNYGSSGNKLIF;TRA:CVLGDQGGRALIF
clone_164_seq_2	H11_PD1_KO_clonotype158	2	TRB:CASSFWGQGGNTLYF;TRA:CAVTRYNVLYF
clone_165_seq_2	H11_PD1_KO_clonotype165	2	TRB:CAWSLDWVYF;TRA:CAIDRASSSFSKLVF
clone_166_seq_2	H11_PD1_KO_clonotype166	2	TRB:CTCSARDRGNSDYTF;TRB:CTCSSGGSYAEQFF;TRA:CAADSGNKLTF
clone_167_seq_2	H11_PD1_KO_clonotype167	2	TRB:CGALSSYEQYF;TRA:CAAFNSAGNKLTF;TRA:CALSSRNMGYKLTF
clone_168_seq_2	H11_PD1_KO_clonotype170	2	TRB:CASRDSAETLYF;TRB:CASSDAWGINYAEQFF;TRA:CAAEPTGGNNKLTF
clone_169_seq_2	H11_PD1_KO_clonotype171	2	TRB:CGASGGQNTLYF;TRA:CAASENSNNRIFF
clone_170_seq_2	H11_PD1_KO_clonotype172	2	TRB:CASSPNQDTQYF;TRA:CAASPSSNTNKVVF
clone_171_seq_2	H11_PD1_KO_clonotype174	2	TRB:CATLGTSQNTLYF;TRA:CALGIHSNYQLIW
clone_172_seq_2	H11_PD1_KO_clonotype175	2	TRB:CASNRGGTEVFF;TRA:CAARTGGYKVVF
clone_173_seq_2	H11_PD1_KO_clonotype176	2	TRB:CASSEGAETLYF;TRA:CAASGGYKVVF
clone_174_seq_2	H11_PD1_KO_clonotype177	2	TRB:CGARLGGDSDYTF;TRA:CAARPSSSFSKLVF
clone_175_seq_2	H11_PD1_KO_clonotype178	2	TRB:CASSRTGEEQYF;TRA:CAIGNYAQGLTF
clone_176_seq_2	H11_PD1_KO_clonotype179	2	TRB:CASSDQGAGAEQFF;TRB:CAWSWGFQDTQYF;TRA:CILRVEEGGSAKLIF
clone_177_seq_2	H11_PD1_KO_clonotype180	2	TRB:CASSAQSSYEQYF;TRA:CAAEVYTEGADRLTF
clone_178_seq_2	H11_PD1_KO_clonotype184	2	TRB:CASSRDWGYEQYF;TRA:CAASPRNNNNAPRF
clone_179_seq_2	H11_PD1_KO_clonotype185	2	TRB:CASSDYSGNTLYF;TRA:CAAYTNAYKVIF
clone_180_seq_2	H11_PD1_KO_clonotype186	2	TRB:CASSPRANTGQLYF;TRA:CAVRDFMDYANKMIF
clone_181_seq_2	H11_PD1_KO_clonotype187	2	TRB:CGARDWESSYEQYF;TRA:CAVSPLPGTGSNRLTF
clone_182_seq_2	H11_PD1_KO_clonotype188	2	TRB:CASRLGETLYF;TRA:CATLTNSAGNKLTF
clone_183_seq_2	H11_PD1_KO_clonotype189	2	TRB:CAWSLGGGAETLYF;TRA:CAASTNAYKVIF
clone_184_seq_2	H11_PD1_KO_clonotype191	2	TRB:CGARDHGHQNTLYF;TRA:CALSNSGTYQRF
clone_185_seq_2	H11_PD1_KO_clonotype192	2	TRB:CASSPGVDTEVFF;TRA:CAASARNYAQGLTF
clone_186_seq_2	H11_PD1_KO_clonotype193	2	TRB:CASSLEGRDNSPLYF;TRB:CTCSAENEQYF;TRA:CALREGSNNRIFF
clone_187_seq_2	H11_PD1_KO_clonotype194	2	TRB:CASGDAQSNTEVFF;TRA:CALGNSGTYQRF
clone_188_seq_2	H11_PD1_KO_clonotype197	2	TRB:CASSPRGYEQYF;TRA:CALEPGDYNQGKLIF;TRA:CVLTLNSGGSNAKLTF
clone_189_seq_2	H11_PD1_KO_clonotype198	2	TRB:CASSLRRTEVFF;TRA:CAMRVPATSSGQKLVF
clone_190_seq_2	H11_PD1_KO_clonotype199	2	TRB:CASSADRGRERLFF;TRA:CALSITGNTGKLIF
clone_191_seq_2	H11_PD1_KO_clonotype200	2	TRB:CASSYQGGTEVFF;TRA:CAVTQTTASLGKLQF
clone_192_seq_2	H11_PD1_KO_clonotype201	2	TRB:CASSQERGGETLYF;TRB:CASSQGTGSSYEQYF;TRA:CAASETTGGNNKLTF
clone_193_seq_2	H11_PD1_KO_clonotype202	2	TRB:CASSLGRGEQYF;TRA:CAASDTEGADRLTF
clone_194_seq_2	H11_PD1_KO_clonotype203	2	TRB:CASSPRQANTEVFF;TRA:CAAHRGSALGRLHF
clone_195_seq_2	H11_PD1_KO_clonotype204	2	TRB:CASSQELGSAETLYF;TRA:CALSDGTGYQNFYF;TRA:CAMERGSGGSNAKLTF
clone_196_seq_2	H11_PD1_KO_clonotype206	2	TRB:CASSLSISGFSGNTLYF;TRA:CALGNMGYKLTF
clone_197_seq_2	H11_PD1_KO_clonotype207	2	TRB:CASSLNSQDTQYF;TRA:CAMSDSNNRIFF
clone_198_seq_2	H11_PD1_KO_clonotype209	2	TRB:CASSPDWGYEQYF;TRA:CAVSETASLGKLQF
clone_199_seq_2	H11_PD1_KO_clonotype210	2	TRB:CASGEQGRSAETLYF;TRA:CAAEAWANYNVLYF;TRA:CAVSSAYKVIF
clone_200_seq_2	H11_PD1_KO_clonotype211	2	TRB:CASSGVRGHSGNTLYF;TRA:CAVKGADRLTF
clone_201_seq_2	H11_PD1_KO_clonotype212	2	TRB:CASSLDISNERLFF;TRA:CAIDRDNYAQGLTF
clone_202_seq_2	H11_PD1_KO_clonotype214	2	TRB:CASSFPGRDQAPLF;TRA:CAASSMGYKLTF
clone_203_seq_2	H11_PD1_KO_clonotype216	2	TRB:CASSHWGGAETLYF;TRA:CAVSPSNMGYKLTF
clone_204_seq_2	H11_PD1_KO_clonotype217	2	TRB:CASSLQGANSDYTF;TRA:CAASKGGTNAYKVIF
clone_205_seq_2	H11_PD1_KO_clonotype218	2	TRB:CASSLGDRDGEQYF;TRA:CAVSAGANTGKLTF
clone_206_seq_2	H11_PD1_KO_clonotype221	2	TRB:CASSILGVYAEQFF;TRB:CASSRKQGTEVFF;TRA:CAVSENYAQGLTF
clone_207_seq_2	H11_PD1_KO_clonotype222	2	TRB:CASSGLGGLEQYF;TRA:CAMRGMDYANKMIF
clone_208_seq_2	H11_PD1_KO_clonotype223	2	TRB:CASSLGGTGQLYF;TRA:CAASHNYGNEKITF;TRA:CAVSADSNNRLTL
clone_209_seq_2	H11_PD1_KO_clonotype224	2	TRB:CASSLSTDNNQAPLF;TRB:CASSQEGLGGYEQYF;TRA:CALSDETGNYKYVF
clone_210_seq_2	H11_PD1_KO_clonotype226	2	TRB:CASSRGTDTEVFF;TRA:CAVSMETGGYKVVF
clone_211_seq_2	H11_PD1_KO_clonotype227	2	TRB:CASSLGLGGLEQYF;TRA:CAMREGNSGGSNAKLTF
clone_212_seq_2	H11_PD1_KO_clonotype228	2	TRB:CASSLAGSNQAPLF;TRA:CALSGGGYKVVF
clone_213_seq_2	H11_PD1_KO_clonotype229	2	TRB:CASSQTGRSAETLYF;TRA:CAADRGSALGRLHF;TRA:CAAEVLSNYNVLYF
clone_214_seq_2	H11_PD1_KO_clonotype230	2	TRB:CASSPGTGGRDTQYF;TRA:CAARAGGYKVVF;TRA:CAASGEGGRALIF
clone_215_seq_2	H11_PD1_KO_clonotype231	2	TRB:CASSGQGAGTGQLYF;TRA:CAALNNNNAPRF;TRA:CVVGATNTNKVVF
clone_216_seq_2	H11_PD1_KO_clonotype232	2	TRB:CASSMTISGNTLYF;TRA:CAASTLSSGSWQLIF
clone_217_seq_2	H11_PD1_KO_clonotype233	2	TRB:CASSQDTYSGNTLYF;TRA:CAVSAWGSNTNKVVF
clone_218_seq_2	H11_PD1_KO_clonotype234	2	TRB:CASSRDLGGSYEQYF;TRB:CASSSRGAGNERLFF;TRA:CAASMPGGNYKPTF
clone_219_seq_2	H11_PD1_KO_clonotype235	2	TRB:CASSRRGDSAETLYF;TRA:CAVRESSGSWQLIF
clone_220_seq_2	H11_PD1_KO_clonotype236	2	TRB:CASSQEGQGTNERLFF;TRA:CALGANSGTYQRF
clone_221_seq_2	H11_PD1_KO_clonotype238	2	TRB:CASSWTGGENTLYF;TRA:CALGDGNNAGAKLTF
clone_222_seq_2	H11_PD1_KO_clonotype239	2	TRB:CASSIRGGEQYF;TRA:CAASPSSGQKLVF
clone_223_seq_2	H11_PD1_KO_clonotype240	2	TRB:CASRGGQNERLFF;TRB:CASSQDWGSSYEQYF;TRA:CAAESNTGYQNFYF
clone_224_seq_2	H11_PD1_KO_clonotype241	2	TRB:CASSPTGADSDYTF;TRA:CAARANSGTYQRF
clone_225_seq_2	H11_PD1_KO_clonotype242	2	TRB:CASSIGGANTLYF;TRA:CAASLNSGGSNAKLTF
clone_226_seq_2	H11_PD1_KO_clonotype243	2	TRB:CASSLEGQLSNERLFF;TRB:CASSQEGTGGNEQYF;TRA:CAAGTGGYKVVF;TRA:CALGDQVGDNSKLIW
clone_227_seq_2	H11_PD1_KO_clonotype244	2	TRB:CASSSGRRSGNTLYF;TRA:CALSDPGSSGNKLIF
clone_228_seq_2	H11_PD1_KO_clonotype245	2	TRB:CASSLARRSGNTLYF;TRA:CAVSAGNYNQGKLIF
clone_229_seq_2	H11_PD1_KO_clonotype246	2	TRB:CASSLGGGAENTLYF;TRA:CALGEPNTNKVVF
clone_230_seq_2	H11_PD1_KO_clonotype247	2	TRB:CASSPLGGSAETLYF;TRA:CAMESNMGYKLTF
clone_231_seq_2	H11_PD1_KO_clonotype249	2	TRB:CARPWGHYAEQFF;TRB:CASGGTGGAEQFF;TRA:CALGDGNMGYKLTF
clone_232_seq_2	H11_PD1_KO_clonotype250	2	TRB:CASSSQGAGGERLFF;TRA:CALEGPPGANTGKLTF
clone_233_seq_2	H11_PD1_KO_clonotype251	2	TRB:CASSLQGACAETLYF;TRA:CALEGPTGANTGKLTF
clone_234_seq_2	H11_PD1_KO_clonotype252	2	TRB:CASSIGTANTEVFF;TRA:CALVDQGNMGYKLTF
clone_235_seq_2	H11_PD1_KO_clonotype253	2	TRB:CASSRGTGEGAETLYF;TRA:CALSAPWEGIFF
clone_236_seq_2	H11_PD1_KO_clonotype254	2	TRB:CASSFFWGGRQNTLYF;TRA:CALERGTNTGKLTF
clone_237_seq_2	H11_PD1_KO_clonotype255	2	TRB:CTCSAVGAGQNTLYF;TRA:CALMAGGSNAKLTF
clone_238_seq_2	H11_PD1_KO_clonotype256	2	TRB:CASSMGGAPYAEQFF;TRA:CAMRASSGSWQLIF
clone_239_seq_2	H11_PD1_KO_clonotype257	2	TRB:CASSLGAGQDTQYF;TRB:CASSQEGRTDNERLFF;TRA:CAASPSNTNKVVF;TRA:CATDTNAYKVIF
clone_240_seq_2	H11_PD1_KO_clonotype259	2	TRB:CASSLEYEQYF;TRA:CAASAEGTGSKLSF;TRA:CAASSGGNNKLTF
clone_241_seq_2	H11_PD1_KO_clonotype262	2	TRB:CASSWGENTLYF;TRA:CAAPEITGNTGKLIF;TRA:CAATMNYNQGKLIF
clone_242_seq_2	H11_PD1_KO_clonotype263	2	TRB:CASGAGTHAEQFF;TRA:CAPDTNAYKVIF
clone_243_seq_2	H11_PD1_KO_clonotype264	2	TRB:CASSQGEDTEVFF;TRA:CALRGYKVVF
clone_244_seq_2	H11_PD1_KO_clonotype265	2	TRB:CASSSNSNERLFF;TRA:CAVSGGSNYKLTF
clone_245_seq_2	H11_PD1_KO_clonotype266	2	TRB:CASRDRGTETLYF;TRA:CAASINSGGSNAKLTF
clone_246_seq_2	H11_PD1_KO_clonotype267	2	TRB:CASGDAGNSPLYF;TRA:CAASGNSGGSNYKLTF
clone_247_seq_2	H11_PD1_KO_clonotype269	2	TRB:CASGPGLGAETLYF;TRA:CAAWGSGYNKLTF
clone_248_seq_2	H11_PD1_KO_clonotype270	2	TRB:CASGDSGGDSDYTF;TRA:CALERNAGAKLTF
clone_249_seq_2	H11_PD1_KO_clonotype271	2	TRB:CASASGGERDTQYF;TRA:CATGHSNNRIFF
clone_250_seq_2	H11_PD1_KO_clonotype272	2	TRB:CASGDPGYTGQLYF;TRA:CAMGDNTGNYKYVF
clone_251_seq_2	H11_PD1_KO_clonotype273	2	TRB:CASSRDRVQDTQYF;TRA:CAAEASSGSWQLIF
clone_252_seq_2	H11_PD1_KO_clonotype274	2	TRB:CASSLEDANTEVFF;TRA:CALGDSQVVGQLTF
clone_253_seq_2	H11_PD1_KO_clonotype276	2	TRB:CASSLDGGGNERLFF;TRA:CAASKNNYAQGLTF;TRA:CALGSSNTNKVVF
clone_254_seq_2	H11_PD1_KO_clonotype278	2	TRB:CASSPGTGGAYEQYF;TRA:CAMREGGGSNYKLTF
clone_255_seq_2	H11_PD1_KO_clonotype279	2	TRB:CASGVSREDTGQLYF;TRA:CAAASGGNYKPTF
clone_256_seq_2	H11_PD1_KO_clonotype280	2	TRB:CASGATGGEQYF;TRB:CASGDGTGGSAETLYF;TRA:CSARNYNQGKLIF
clone_257_seq_2	H11_PD1_KO_clonotype281	2	TRB:CASGDVGNWGGQNTLYF;TRB:CASSGQGAGTGQLYF;TRA:CALSRGSALGRLHF
clone_258_seq_2	H11_PD1_KO_clonotype282	2	TRB:CASSLEGLGGSQNTLYF;TRA:CAVNTGYQNFYF
clone_259_seq_2	H11_PD1_KO_clonotype1000	1	TRB:CASSGDNQDTQYF
clone_260_seq_2	H11_PD1_KO_clonotype1001	1	TRB:CASSRGGAETLYF
clone_261_seq_2	H11_PD1_KO_clonotype1002	1	TRB:CASSLTGRTEVFF
clone_262_seq_2	H11_PD1_KO_clonotype1003	1	TRB:CASSLTGRTEVFF
clone_263_seq_2	H11_PD1_KO_clonotype1004	1	TRB:CASSLWGGNTLYF
clone_264_seq_2	H11_PD1_KO_clonotype1005	1	TRB:CASSVGQNSDYTF
clone_265_seq_2	H11_PD1_KO_clonotype1006	1	TRB:CASSLDRVYEQYF
clone_266_seq_2	H11_PD1_KO_clonotype1007	1	TRB:CASRNKNTGQLYF
clone_267_seq_2	H11_PD1_KO_clonotype1008	1	TRB:CASRLGLQDTQYF
clone_268_seq_2	H11_PD1_KO_clonotype1009	1	TRB:CASSSDISYEQYF
clone_269_seq_2	H11_PD1_KO_clonotype1010	1	TRB:CASSLTGAYEQYF
clone_270_seq_2	H11_PD1_KO_clonotype1011	1	TRB:CASSLEGRGGQYF
clone_271_seq_2	H11_PD1_KO_clonotype1012	1	TRB:CASSLGGGREQYF
clone_272_seq_2	H11_PD1_KO_clonotype1013	1	TRB:CASSLGSAETLYF
clone_273_seq_2	H11_PD1_KO_clonotype1014	1	TRB:CASSLGLQDTQYF
clone_274_seq_2	H11_PD1_KO_clonotype1015	1	TRB:CARRGTGCERLFF
clone_275_seq_2	H11_PD1_KO_clonotype1016	1	TRB:CASSNPGQGSYEQYF
clone_276_seq_2	H11_PD1_KO_clonotype1017	1	TRB:CASSDNWGSQNTLYF
clone_277_seq_2	H11_PD1_KO_clonotype1018	1	TRB:CASSDLGGNTGQLYF
clone_278_seq_2	H11_PD1_KO_clonotype1019	1	TRB:CASSGLGGRPETLYF
clone_279_seq_2	H11_PD1_KO_clonotype1020	1	TRB:CASGDRGLNTGQLYF
clone_280_seq_2	H11_PD1_KO_clonotype1021	1	TRB:CASGDRGLNTGQLYF
clone_281_seq_2	H11_PD1_KO_clonotype1022	1	TRB:CASGDPGRSSYEQYF
clone_282_seq_2	H11_PD1_KO_clonotype1023	1	TRB:CASGATDLPQDTQYF
clone_283_seq_2	H11_PD1_KO_clonotype1024	1	TRB:CASSENWGGAGAEQFF
clone_284_seq_2	H11_PD1_KO_clonotype1025	1	TRB:CASSDALGGHYAEQFF
clone_285_seq_2	H11_PD1_KO_clonotype1026	1	TRB:CASSQDGQGADYTF
clone_286_seq_2	H11_PD1_KO_clonotype1027	1	TRB:CASSQEGANTEVFF
clone_287_seq_2	H11_PD1_KO_clonotype1028	1	TRB:CASSQEGANTEVFF
clone_288_seq_2	H11_PD1_KO_clonotype1029	1	TRB:CASSQVRGDTEVFF
clone_289_seq_2	H11_PD1_KO_clonotype1030	1	TRB:CASSQVGSAETLYF
clone_290_seq_2	H11_PD1_KO_clonotype1031	1	TRB:CASSPPGGQDTQYF
clone_291_seq_2	H11_PD1_KO_clonotype1032	1	TRB:CASSPGLGGREQYF
clone_292_seq_2	H11_PD1_KO_clonotype1033	1	TRB:CASSRDRGDERLFF
clone_293_seq_2	H11_PD1_KO_clonotype1034	1	TRB:CASSYTGGQNTLYF
clone_294_seq_2	H11_PD1_KO_clonotype1035	1	TRB:CASSYTGGQNTLYF
clone_295_seq_2	H11_PD1_KO_clonotype1036	1	TRB:CASSYTGGQNTLYF
clone_296_seq_2	H11_PD1_KO_clonotype1037	1	TRB:CASSYTGGQNTLYF
clone_297_seq_2	H11_PD1_KO_clonotype1038	1	TRB:CASSYGVPSYEQYF
clone_298_seq_2	H11_PD1_KO_clonotype1039	1	TRB:CASSSLGVYAEQFF
clone_299_seq_2	H11_PD1_KO_clonotype1041	1	TRB:CASSSTGAQDTQYF
clone_300_seq_2	H11_PD1_KO_clonotype1042	1	TRB:CASSSTGAQDTQYF
clone_301_seq_2	H11_PD1_KO_clonotype1043	1	TRB:CASSFQANTGQLYF
clone_302_seq_2	H11_PD1_KO_clonotype1044	1	TRB:CASSPGLGGREQYF
clone_303_seq_2	H11_PD1_KO_clonotype1045	1	TRB:CASSPGLGGREQYF
clone_304_seq_2	H11_PD1_KO_clonotype1046	1	TRB:CASSPGLGGREQYF
clone_305_seq_2	H11_PD1_KO_clonotype1047	1	TRB:CASSRQANTGQLYF
clone_306_seq_2	H11_PD1_KO_clonotype1048	1	TRB:CTCSADSYEQYF
clone_307_seq_2	H11_PD1_KO_clonotype1049	1	TRB:CTCSADSERLFF
clone_308_seq_2	H11_PD1_KO_clonotype1051	1	TRB:CTCSARNTEVFF
clone_309_seq_2	H11_PD1_KO_clonotype1052	1	TRB:CASSLLGQDTQYF;TRA:CAANNRIFF
clone_310_seq_2	H11_PD1_KO_clonotype1053	1	TRB:CASSPGQSYEQYF;TRA:CARSNYNVLYF
clone_311_seq_2	H11_PD1_KO_clonotype1054	1	TRB:CASSQEAANSDYTF;TRA:CAAENYKLTF
clone_312_seq_2	H11_PD1_KO_clonotype1055	1	TRB:CASSLAGARNSDYTF;TRB:CASSYTNTGQLYF;TRA:CAAYSGTYQRF
clone_313_seq_2	H11_PD1_KO_clonotype1056	1	TRB:CASSQDRGNTQYF;TRA:CAAEGTNKVVF
clone_314_seq_2	H11_PD1_KO_clonotype1057	1	TRB:CASSSDSYAEQFF;TRA:CALPGYQNFYF
clone_315_seq_2	H11_PD1_KO_clonotype1058	1	TRB:CASTSGGSTGQLYF;TRA:CAADTGYQNFYF
clone_316_seq_2	H11_PD1_KO_clonotype1059	1	TRB:CASSQDWHTQDTQYF;TRA:CAAENSNYQLIW
clone_317_seq_2	H11_PD1_KO_clonotype1060	1	TRB:CASSSGNTGQLYF;TRA:CAAVSNYNVLYF
clone_318_seq_2	H11_PD1_KO_clonotype1061	1	TRB:CASSLLGRYEQYF;TRA:CAVIINKMIF
clone_319_seq_2	H11_PD1_KO_clonotype1062	1	TRB:CASSLGTGTEVFF;TRA:CAIDQGGRALIF
clone_320_seq_2	H11_PD1_KO_clonotype1063	1	TRB:CASSDARTINQDTQYF;TRA:CAAGTGGYKVVF
clone_321_seq_2	H11_PD1_KO_clonotype1065	1	TRB:CASSSGTGGDTQYF;TRB:CASSSNERLFF;TRA:CAAESTNTGKLTF;TRA:CAANTNTGKLTF
clone_322_seq_2	H11_PD1_KO_clonotype1067	1	TRB:CASSSGGPLWAEQFF;TRA:CAVDSNYQLIW
clone_323_seq_2	H11_PD1_KO_clonotype1068	1	TRB:CASSWQGSSDYTF;TRA:CAAQDTNAYKVIF
clone_324_seq_2	H11_PD1_KO_clonotype1069	1	TRB:CASGLGNQNTLYF;TRA:CILRGTTGGNNKLTF
clone_325_seq_2	H11_PD1_KO_clonotype1070	1	TRB:CASSPGGRQNTLYF;TRA:CATDSNYQLIW
clone_326_seq_2	H11_PD1_KO_clonotype1071	1	TRB:CASSRGRPNTEVFF;TRA:CASASSGSWQLIF
clone_327_seq_2	H11_PD1_KO_clonotype1072	1	TRB:CASSSGQEDTQYF;TRA:CAAASSGSWQLIF
clone_328_seq_2	H11_PD1_KO_clonotype1073	1	TRB:CASSLDGAREQYF;TRA:CAADTGSGGKLTL
clone_329_seq_2	H11_PD1_KO_clonotype1074	1	TRB:CASSLAGGNTLYF;TRA:CAALTGNTGKLIF
clone_330_seq_2	H11_PD1_KO_clonotype1075	1	TRB:CASGDGKNTLYF;TRB:CASNWGIQDTQYF;TRA:CAMREAASGSWQLIF;TRA:CAPTNSAGNKLTF
clone_331_seq_2	H11_PD1_KO_clonotype1076	1	TRB:CASSLNRAETLYF;TRA:CAMDGGSNAKLTF
clone_332_seq_2	H11_PD1_KO_clonotype1078	1	TRB:CASSFAGSNSPLYF;TRA:CAAIASSSFSKLVF
clone_333_seq_2	H11_PD1_KO_clonotype1079	1	TRB:CASSQPGTSAETLYF;TRA:CAAEYMSNYNVLYF
clone_334_seq_2	H11_PD1_KO_clonotype1080	1	TRB:CASSPRQGRDTEVFF;TRA:CALCNAGAKLTF;TRA:CATDPNTNKVVF
clone_335_seq_2	H11_PD1_KO_clonotype1081	1	TRB:CAWSLGTGPSQNTLYF;TRA:CAVSGNNNAPRF
clone_336_seq_2	H11_PD1_KO_clonotype1083	1	TRB:CASSSLGLDTQYF;TRA:CAAVYNTNTGKLTF
clone_337_seq_2	H11_PD1_KO_clonotype1084	1	TRB:CASSWGDQDTQYF;TRA:CAAGNAGAKLTF
clone_338_seq_2	H11_PD1_KO_clonotype1085	1	TRB:CASSLANQDTQYF;TRA:CAARGSGGSNAKLTF;TRA:CAVEASSSFSKLVF
clone_339_seq_2	H11_PD1_KO_clonotype1086	1	TRB:CASSLVNNQAPLF;TRB:CASSQVGEGNTEVFF;TRA:CALERKTNTGKLTF;TRA:CAVRNNYAQGLTF
clone_340_seq_2	H11_PD1_KO_clonotype1087	1	TRB:CASSLRGNSDYTF;TRA:CAASEHQGKLIF;TRA:CALSALRGSALGRLHF
clone_341_seq_2	H11_PD1_KO_clonotype1088	1	TRB:CASSFLGGAEQFF;TRA:CAIDRGNAGAKLTF
clone_342_seq_2	H11_PD1_KO_clonotype1089	1	TRB:CASSGGTGGYAEQFF;TRA:CAAGDYANKMIF
clone_343_seq_2	H11_PD1_KO_clonotype1090	1	TRB:CASGRGGAGQNTLYF;TRA:CATRMNYNQGKLIF
clone_344_seq_2	H11_PD1_KO_clonotype1091	1	TRB:CASGDWGGAEAEQFF;TRB:CASSRTGRSAETLYF;TRA:CAAEAMSNYNVLYF;TRA:CALTLYNNNAPRF
clone_345_seq_2	H11_PD1_KO_clonotype1092	1	TRB:CASSQDWDQDTQYF;TRA:CILRGGQQGTGSKLSF
clone_346_seq_2	H11_PD1_KO_clonotype1093	1	TRB:CASSYPGLLNTLYF;TRA:CAAPRAGNKLTF
clone_347_seq_2	H11_PD1_KO_clonotype1094	1	TRB:CTCSADGGEQYF;TRA:CAVKYNQGKLIF
clone_348_seq_2	H11_PD1_KO_clonotype1095	1	TRB:CASSLSTARERLFF;TRA:CALWELESSGSWQLIF;TRA:CAVEANSGTYQRF
clone_349_seq_2	H11_PD1_KO_clonotype1096	1	TRB:CASSFGQGNSPLYF;TRA:CAASVTGGYKVVF
clone_350_seq_2	H11_PD1_KO_clonotype1097	1	TRB:CASSQDQGPNSDYTF;TRA:CALSNNAPRF
clone_351_seq_2	H11_PD1_KO_clonotype1098	1	TRB:CASSQGTGTSDYTF;TRB:CAWSLESGRGNTEVFF;TRA:CAASYQGGRALIF
clone_352_seq_2	H11_PD1_KO_clonotype1099	1	TRB:CASSGGGQNTLYF;TRA:CAASEGSNYQLIW
clone_353_seq_2	H11_PD1_KO_clonotype1100	1	TRB:CASSLVGGAEQFF;TRA:CAVSDTGNYKYVF
clone_354_seq_2	H11_PD1_KO_clonotype1101	1	TRB:CASSLSSNSDYTF;TRA:CAVSANNNRIFF
clone_355_seq_2	H11_PD1_KO_clonotype1102	1	TRB:CASRQIHTGQLYF;TRA:CAASTSGSWQLIF
clone_356_seq_2	H11_PD1_KO_clonotype1103	1	TRB:CASLGGSTGQLYF;TRA:CAAEDSGGSNAKLTF
clone_357_seq_2	H11_PD1_KO_clonotype1104	1	TRB:CASSLAGFSYEQYF;TRB:CASSLREDTEVFF;TRA:CAVSRTNTGKLTF
clone_358_seq_2	H11_PD1_KO_clonotype1105	1	TRB:CASSLETGERLFF;TRA:CALTPWSNNRIFF
clone_359_seq_2	H11_PD1_KO_clonotype1106	1	TRB:CASSLDTGDEQYF;TRA:CAAADTNAYKVIF
clone_360_seq_2	H11_PD1_KO_clonotype1107	1	TRB:CASSLGHQDTQYF;TRA:CAMRDPVGYKLTF
clone_361_seq_2	H11_PD1_KO_clonotype1108	1	TRB:CASSRDTNTEVFF;TRA:CVLSTNAYKVIF
clone_362_seq_2	H11_PD1_KO_clonotype1109	1	TRB:CASSFTDSYEQYF;TRA:CAVGGNNNAPRF
clone_363_seq_2	H11_PD1_KO_clonotype1110	1	TRB:CASSRQGNTEVFF;TRA:CAVSRNNNNAPRF
clone_364_seq_2	H11_PD1_KO_clonotype1111	1	TRB:CASSLAGEITLYF;TRA:CALGDRRSNYQLIW;TRA:CVNYGSSGNKLIF
clone_365_seq_2	H11_PD1_KO_clonotype1112	1	TRB:CASSDAPGRVYEQYF;TRA:CATDRNNNNAPRF
clone_366_seq_2	H11_PD1_KO_clonotype1113	1	TRB:CASSDVGQGWTEVFF;TRA:CAVITGNTGKLIF
clone_367_seq_2	H11_PD1_KO_clonotype1114	1	TRB:CASSETGGNSGNTLYF;TRA:CAVRNYNQGKLIF
clone_368_seq_2	H11_PD1_KO_clonotype1116	1	TRB:CASSQLGGSYEQYF;TRA:CAMEHMQGGSAKLIF
clone_369_seq_2	H11_PD1_KO_clonotype1117	1	TRB:CASSLTGGNSPLYF;TRA:CALSVYNQGKLIF
clone_370_seq_2	H11_PD1_KO_clonotype1118	1	TRB:CTCSAEGHTLYF;TRA:CAARNSNNRIFF
clone_371_seq_2	H11_PD1_KO_clonotype1119	1	TRB:CASRQQDTQYF;TRA:CAGGDSNYQLIW
clone_372_seq_2	H11_PD1_KO_clonotype1120	1	TRB:CASSDNYEQYF;TRA:CAVSRNNYAQGLTF
clone_373_seq_2	H11_PD1_KO_clonotype1121	1	TRB:CASSLGGKAETLYF;TRA:CAASGDSGYNKLTF
clone_374_seq_2	H11_PD1_KO_clonotype1122	1	TRB:CASIQDTSQNTLYF;TRA:CAASRTGNTGKLIF;TRA:CAMNYGSSGNKLIF
clone_375_seq_2	H11_PD1_KO_clonotype1123	1	TRB:CASSQEWTANTEVFF;TRB:CTCSTTGGAHAEQFF;TRA:CAARDYANKMIF;TRA:CALTTASLGKLQF
clone_376_seq_2	H11_PD1_KO_clonotype1124	1	TRB:CASSQDPQSSYEQYF;TRA:CAAETNSAGNKLTF
clone_377_seq_2	H11_PD1_KO_clonotype1126	1	TRB:CASSQGTISNERLFF;TRA:CAVSATSSGQKLVF
clone_378_seq_2	H11_PD1_KO_clonotype1127	1	TRB:CASSQGGGRYAEQFF;TRA:CAWNTGYQNFYF
clone_379_seq_2	H11_PD1_KO_clonotype1128	1	TRB:CAWSLGWGPSQNTLYF;TRA:CAVSISSNTNKVVF
clone_380_seq_2	H11_PD1_KO_clonotype1129	1	TRB:CASSSSYNSPLYF;TRA:CAVSGVGYQNFYF
clone_381_seq_2	H11_PD1_KO_clonotype1130	1	TRB:CASSLDWDYEQYF;TRA:CAAEAGYGSSGNKLIF
clone_382_seq_2	H11_PD1_KO_clonotype1131	1	TRB:CASSRRDSSYEQYF;TRA:CALARSSGSWQLIF;TRA:CAMEPNSAGNKLTF
clone_383_seq_2	H11_PD1_KO_clonotype1132	1	TRB:CASPDRANSDYTF;TRB:CASTDANTGQLYF;TRA:CAVSITGSFNKLTF
clone_384_seq_2	H11_PD1_KO_clonotype1133	1	TRB:CASSQQGNTEVFF;TRA:CAVSSGGSNYKLTF
clone_385_seq_2	H11_PD1_KO_clonotype1134	1	TRB:CASSLQGAETLYF;TRA:CALRGSALGRLHF
clone_386_seq_2	H11_PD1_KO_clonotype1135	1	TRB:CASSLVVGNTLYF;TRA:CAATNTGNYKYVF;TRA:CADLPGTGSNRLTF
clone_387_seq_2	H11_PD1_KO_clonotype1136	1	TRB:CASSLDERNQDTQYF;TRB:CASSWGNYAEQFF;TRA:CALGNMGYKLTF
clone_388_seq_2	H11_PD1_KO_clonotype1137	1	TRB:CASSWDSSYEQYF;TRA:CAHNSGGSNAKLTF
clone_389_seq_2	H11_PD1_KO_clonotype1138	1	TRB:CASSFQTNTEVFF;TRA:CAASVGSGSWQLIF
clone_390_seq_2	H11_PD1_KO_clonotype1139	1	TRB:CASRTDGTSAETLYF;TRA:CAARYNNAGAKLTF
clone_391_seq_2	H11_PD1_KO_clonotype1140	1	TRB:CASSLRDWDSYEQYF;TRA:CVLSLGYNNAPRF
clone_392_seq_2	H11_PD1_KO_clonotype1141	1	TRB:CASSDRGRSQDTQYF;TRA:CVLSVTGNYKYVF
clone_393_seq_2	H11_PD1_KO_clonotype1142	1	TRB:CASSDARGDAETLYF;TRA:CVLGGNTNTGKLTF
clone_394_seq_2	H11_PD1_KO_clonotype1143	1	TRB:CASSVPGQSQNTLYF;TRA:CAVRGSSGSWQLIF
clone_395_seq_2	H11_PD1_KO_clonotype1144	1	TRB:CASGDGGASAETLYF;TRA:CAMSDRGSALGRLHF;TRA:CAVSPSGSFNKLTF
clone_396_seq_2	H11_PD1_KO_clonotype1146	1	TRB:CASSYTGGQNTLYF;TRA:CAVSAKNANKMIF
clone_397_seq_2	H11_PD1_KO_clonotype1147	1	TRB:CASSWDIYNSPLYF;TRA:CAASKGTNTGKLTF
clone_398_seq_2	H11_PD1_KO_clonotype1149	1	TRB:CTCSARGTEVFF;TRA:CAASITGNTGKLIF
clone_399_seq_2	H11_PD1_KO_clonotype1150	1	TRB:CTCSADRVEQYF;TRA:CAVSAPGGNYKYVF
clone_400_seq_2	H11_PD1_KO_clonotype1151	1	TRB:CASSTRTGTNTEVFF;TRA:CALGVTGYQNFYF
clone_401_seq_2	H11_PD1_KO_clonotype1152	1	TRB:CASSQEGGYNERLFF;TRA:CVLGDTGANTGKLTF
clone_402_seq_2	H11_PD1_KO_clonotype1153	1	TRB:CASSQDGWGAYEQYF;TRA:CAAGAGGTGSKLSF;TRA:CALSAPQGTGSKLSF
clone_403_seq_2	H11_PD1_KO_clonotype1154	1	TRB:CASSQDGGSSYEQYF;TRA:CAASARSNNRIFF;TRA:CAVRDTNAYKVIF
clone_404_seq_2	H11_PD1_KO_clonotype1155	1	TRB:CASSQVLGGQNTLYF;TRA:CAVTPTNSAGNKLTF
clone_405_seq_2	H11_PD1_KO_clonotype1156	1	TRB:CASSHPGTGAETLYF;TRB:CTCSGDRANTEVFF;TRA:CAMRETNSAGNKLTF
clone_406_seq_2	H11_PD1_KO_clonotype1157	1	TRB:CASSPRDRGQDTQYF;TRA:CAVSASGSWQLIF
clone_407_seq_2	H11_PD1_KO_clonotype1158	1	TRB:CAWSLRTGGYQNTLYF;TRA:CAVTAGNTGKLIF
clone_408_seq_2	H11_PD1_KO_clonotype1159	1	TRB:CASSLTGNTEVFF;TRA:CAATDTNAYKVIF
clone_409_seq_2	H11_PD1_KO_clonotype1160	1	TRB:CASSLEGTGQLYF;TRA:CAAMNTEGADRLTF
clone_410_seq_2	H11_PD1_KO_clonotype1161	1	TRB:CASSRTSSQNTLYF;TRA:CAVSASYTGNYKYVF
clone_411_seq_2	H11_PD1_KO_clonotype1162	1	TRB:CASSSTANTEVFF;TRA:CALTPASSGSWQLIF
clone_412_seq_2	H11_PD1_KO_clonotype1163	1	TRB:CASSLRTGDTQYF;TRA:CAINYNQGKLIF
clone_413_seq_2	H11_PD1_KO_clonotype1164	1	TRB:CASSLESAETLYF;TRA:CAASPTNAYKVIF
clone_414_seq_2	H11_PD1_KO_clonotype1165	1	TRB:CASSLEQGQAPLF;TRA:CALSDRPSNTNKVVF
clone_415_seq_2	H11_PD1_KO_clonotype1166	1	TRB:CASSLDGSTEVFF;TRA:CAVSAGSSGSWQLIF
clone_416_seq_2	H11_PD1_KO_clonotype1167	1	TRB:CASSPGGNTEVFF;TRA:CAVSAAGSGGKLTL
clone_417_seq_2	H11_PD1_KO_clonotype1168	1	TRB:CASSLRGYTEVFF;TRA:CATENYGSSGNKLIF
clone_418_seq_2	H11_PD1_KO_clonotype1169	1	TRB:CASSEQGANTGQLYF;TRA:CALSVMSNYNVLYF;TRA:CALSWYNQGKLIF
clone_419_seq_2	H11_PD1_KO_clonotype1170	1	TRB:CASTPGLGGREQYF;TRA:CALSEYPSGGSNAKLTF;TRA:CALSMRYNQGKLIF
clone_420_seq_2	H11_PD1_KO_clonotype1171	1	TRB:CASSGTTSNERLFF;TRA:CAASRNSNNRIFF
clone_421_seq_2	H11_PD1_KO_clonotype1172	1	TRB:CTCSAGGGEQYF;TRA:CAVRQTGFASALTF
clone_422_seq_2	H11_PD1_KO_clonotype1173	1	TRB:CASSAGNTLYF;TRA:CALQMQQGTGSKLSF
clone_423_seq_2	H11_PD1_KO_clonotype1175	1	TRB:CASSLSQGNTEVFF;TRA:CALGGGFASALTF
clone_424_seq_2	H11_PD1_KO_clonotype1176	1	TRB:CASSFPDRMGEQYF;TRA:CALSDYSNNRLTL
clone_425_seq_2	H11_PD1_KO_clonotype1177	1	TRB:CASSQNRDNYAEQFF;TRA:CVVGRGSALGRLHF
clone_426_seq_2	H11_PD1_KO_clonotype1178	1	TRB:CASSQEDWGEDTQYF;TRA:CAVSDGQGGRALIF
clone_427_seq_2	H11_PD1_KO_clonotype1179	1	TRB:CASSQETGTGNTLYF;TRA:CALMQQGTGSKLSF
clone_428_seq_2	H11_PD1_KO_clonotype1180	1	TRB:CASSQEGGANAEQFF;TRA:CALSPLTTASLGKLQF;TRA:CVLGEDRGSALGRLHF
clone_429_seq_2	H11_PD1_KO_clonotype1181	1	TRB:CASSQEGGGAETLYF;TRA:CAASRGDAGAKLTF;TRA:CVVGATGNNAGAKLTF
clone_430_seq_2	H11_PD1_KO_clonotype1182	1	TRB:CASSQVGTANTEVFF;TRA:CALVNYGNEKITF
clone_431_seq_2	H11_PD1_KO_clonotype1183	1	TRB:CASSSTGGVEQYF;TRA:CAALGTASLGKLQF
clone_432_seq_2	H11_PD1_KO_clonotype1184	1	TRB:CASSRRLGGREQYF;TRA:CAANTGANTGKLTF
clone_433_seq_2	H11_PD1_KO_clonotype1185	1	TRB:CASSAGHIANTEVFF;TRB:CASSRDGDNSDYTF;TRA:CALGDRTGYQNFYF
clone_434_seq_2	H11_PD1_KO_clonotype1186	1	TRB:CASRPDRGDTQYF;TRA:CALSGYNQGKLIF
clone_435_seq_2	H11_PD1_KO_clonotype1187	1	TRB:CASSDWGAETLYF;TRA:CALGANNAGAKLTF
clone_436_seq_2	H11_PD1_KO_clonotype1188	1	TRB:CASSLDSYAEQFF;TRA:CAASRDYNQGKLIF
clone_437_seq_2	H11_PD1_KO_clonotype1189	1	TRB:CASSPRRHSDYTF;TRA:CAASAGANTGKLTF
clone_438_seq_2	H11_PD1_KO_clonotype1191	1	TRB:CASSLQGAETLYF;TRA:CALGERNSNNRIFF
clone_439_seq_2	H11_PD1_KO_clonotype1192	1	TRB:CASSQTGKQDTQYF;TRA:CALGATSSGQKLVF
clone_440_seq_2	H11_PD1_KO_clonotype1193	1	TRB:CASSQDSSGNTLYF;TRA:CAVTANSAGNKLTF
clone_441_seq_2	H11_PD1_KO_clonotype1194	1	TRB:CASSLGQANSDYTF;TRA:CALTSHTGNYKYVF
clone_442_seq_2	H11_PD1_KO_clonotype1195	1	TRB:CASSPGLGGREQYF;TRA:CVLSARNNAGAKLTF
clone_443_seq_2	H11_PD1_KO_clonotype1196	1	TRB:CASSIGTGGYEQYF;TRB:CASSYWVGAETLYF;TRA:CALRDQGGSAKLIF
clone_444_seq_2	H11_PD1_KO_clonotype1197	1	TRB:CASSSTGAQDTQYF;TRA:CAASRPSGSWQLIF
clone_445_seq_2	H11_PD1_KO_clonotype1198	1	TRB:CASSSGLGGREQYF;TRA:CAVRVASSSFSKLVF
clone_446_seq_2	H11_PD1_KO_clonotype1199	1	TRB:CASGEGANTEVFF;TRB:CASSSGLGGREQYF;TRA:CAASGDQGGSAKLIF;TRA:CALRHASSGSWQLIF
clone_447_seq_2	H11_PD1_KO_clonotype1201	1	TRB:CSSSPTGVVEQYF;TRA:CAARGNTGGLSGKLTF
clone_448_seq_2	H11_PD1_KO_clonotype1202	1	TRB:CTCSASQDTQYF;TRA:CAASATSSGQKLVF
clone_449_seq_2	H11_PD1_KO_clonotype1203	1	TRB:CASSATGGAGAEQFF;TRB:CASSPDRVAETLYF;TRA:CAASQGNTGKLIF;TRA:CALGKTGGYKVVF
clone_450_seq_2	H11_PD1_KO_clonotype1204	1	TRB:CASSLSQGNTEVFF;TRA:CALGFTNTGKLTF
clone_451_seq_2	H11_PD1_KO_clonotype1205	1	TRB:CASSQDPGAGAEQFF;TRA:CAVSGATGGNNKLTF
clone_452_seq_2	H11_PD1_KO_clonotype1206	1	TRB:CASSQDGGPQDTQYF;TRA:CVVGDRGSALGRLHF
clone_453_seq_2	H11_PD1_KO_clonotype1207	1	TRB:CASSQDLGSPYEQYF;TRA:CAMDATSSGQKLVF
clone_454_seq_2	H11_PD1_KO_clonotype1208	1	TRB:CASSPTGGISYEQYF;TRA:CAMGASSGQKLVF
clone_455_seq_2	H11_PD1_KO_clonotype1209	1	TRB:CASRLGRQNTLYF;TRA:CVLSGKRLGTGSKLSF
clone_456_seq_2	H11_PD1_KO_clonotype1210	1	TRB:CASSTGGALEQYF;TRA:CALRREGTGSKLSF
clone_457_seq_2	H11_PD1_KO_clonotype1211	1	TRB:CASSGKRGREQYF;TRA:CAAKTFNTNTGKLTF
clone_458_seq_2	H11_PD1_KO_clonotype1212	1	TRB:CASSLPYNSPLYF;TRB:CASSQDLGYEQYF;TRA:CAMSNTGNYKYVF
clone_459_seq_2	H11_PD1_KO_clonotype1213	1	TRB:CASGQGHNERLFF;TRB:CASRIPPNYAEQFF;TRA:CALALYQGGRALIF
clone_460_seq_2	H11_PD1_KO_clonotype1214	1	TRB:CASRTGGKDTQYF;TRB:CTCSVRGDNQAPLF;TRA:CALGATSSGQKLVF;TRA:CAVSYTGGLSGKLTF
clone_461_seq_2	H11_PD1_KO_clonotype1215	1	TRB:CASSTGTKDTQYF;TRA:CALGRNSNNRIFF
clone_462_seq_2	H11_PD1_KO_clonotype1216	1	TRB:CASSTGTGISNERLFF;TRB:CSSSRDNQNTLYF;TRA:CALTHYQGGRALIF
clone_463_seq_2	H11_PD1_KO_clonotype1217	1	TRB:CASSLSPRYTEVFF;TRA:CALGDGNSGTYQRF
clone_464_seq_2	H11_PD1_KO_clonotype1218	1	TRB:CASSQEGQGADTQYF;TRA:CALGDHTNTGKLTF
clone_465_seq_2	H11_PD1_KO_clonotype1219	1	TRB:CASSQEGGHQDTQYF;TRA:CAASGGKLTF
clone_466_seq_2	H11_PD1_KO_clonotype1220	1	TRB:CASSRGTGAYEQYF;TRA:CAASMNTGGLSGKLTF
clone_467_seq_2	H11_PD1_KO_clonotype1221	1	TRB:CASSDAGLSSYEQYF;TRB:CASSRLGGQDTQYF;TRA:CALSAKAASLGKLQF
clone_468_seq_2	H11_PD1_KO_clonotype1222	1	TRB:CASGAGTISNERLFF;TRB:CASSIDISNERLFF;TRA:CAMREGDNYAQGLTF
clone_469_seq_2	H11_PD1_KO_clonotype1223	1	TRB:CASSQQGANSDYTF;TRA:CALGEGTGGYKVVF
clone_470_seq_2	H11_PD1_KO_clonotype1224	1	TRB:CASSPDRYNSPLYF;TRA:CALGDRGNTNTGKLTF
clone_471_seq_2	H11_PD1_KO_clonotype1225	1	TRB:CTCSANRAEQYF;TRA:CAASVMATGGNNKLTF
clone_472_seq_2	H11_PD1_KO_clonotype1226	1	TRB:CASSRDTNTEVFF;TRA:CAASHNNAPRF
clone_473_seq_2	H11_PD1_KO_clonotype1227	1	TRB:CASSQDRDNYAEQFF;TRB:CASSRRGADSDYTF;TRA:CAMREPSNMGYKLTF
clone_474_seq_2	H11_PD1_KO_clonotype1228	1	TRB:CASSLEPNSDYTF;TRA:CALGDRTGNTGKLIF
clone_475_seq_2	H11_PD1_KO_clonotype1229	1	TRB:CTCIDREGEQYF;TRA:CAESNYQLIW
clone_476_seq_2	H11_PD1_KO_clonotype1230	1	TRB:CASSQPGQGLYEQYF;TRA:CAAGQGTGSKLSF
clone_477_seq_2	H11_PD1_KO_clonotype1231	1	TRB:CASRGWDAETLYF;TRA:CAMREGEDTNTGKLTF
clone_478_seq_2	H11_PD1_KO_clonotype1232	1	TRB:CASSEAGVNYAEQFF;TRA:CAMREGYGSSGNKLIF
clone_479_seq_2	H11_PD1_KO_clonotype1233	1	TRB:CASSDQGARGNERLFF;TRA:CAAADSNYQLIW
clone_480_seq_2	H11_PD1_KO_clonotype1234	1	TRB:CASSRDWGEEQYF;TRA:CAAEDYSNNRLTL
clone_481_seq_2	H11_PD1_KO_clonotype1235	1	TRB:CASSLQGASDYTF;TRA:CAASDQGGRALIF
clone_482_seq_2	H11_PD1_KO_clonotype1236	1	TRB:CASSLDSQNTLYF;TRA:CAATSGGNYKPTF
clone_483_seq_2	H11_PD1_KO_clonotype1237	1	TRB:CASSLAENSDYTF;TRA:CAASRAGGYKVVF
clone_484_seq_2	H11_PD1_KO_clonotype1238	1	TRB:CASSPSVGNTLYF;TRA:CAASDTNTGKLTF
clone_485_seq_2	H11_PD1_KO_clonotype1239	1	TRB:CASSSGLGGGEQYF;TRB:CASSTGTGQAPLF;TRA:CAASYSSFSKLVF
clone_486_seq_2	H11_PD1_KO_clonotype1240	1	TRB:CASSLSRGGEQYF;TRA:CAASDYSNNRLTL
clone_487_seq_2	H11_PD1_KO_clonotype1241	1	TRB:CASRLGGRGAETLYF;TRA:CAASAGSFNKLTF
clone_488_seq_2	H11_PD1_KO_clonotype1242	1	TRB:CASRIQGAQAETLYF;TRA:CAAPRTGGYKVVF
clone_489_seq_2	H11_PD1_KO_clonotype1243	1	TRB:CASSDEGLGGREQYF;TRA:CAAGDSGTYQRF
clone_490_seq_2	H11_PD1_KO_clonotype1244	1	TRB:CASGEDWGGSYEQYF;TRA:CAMREGLLAQVVGQLTF
clone_491_seq_2	H11_PD1_KO_clonotype1245	1	TRB:CASTPTGGANTGQLYF;TRA:CAASLFSGKLIF
clone_492_seq_2	H11_PD1_KO_clonotype1246	1	TRB:CASSEDWGGSAETLYF;TRA:CAASSTNAYKVIF
clone_493_seq_2	H11_PD1_KO_clonotype1247	1	TRB:CASSPWVQNTLYF;TRA:CAAEIASSSFSKLVF
clone_494_seq_2	H11_PD1_KO_clonotype1248	1	TRB:CASSLGNQDTQYF;TRB:CTCSAGGQGAETLYF;TRA:CAARAMSNYNVLYF
clone_495_seq_2	H11_PD1_KO_clonotype1249	1	TRB:CASSLDSNERLFF;TRA:CAASKTNAYKVIF
clone_496_seq_2	H11_PD1_KO_clonotype1250	1	TRB:CASSFGDTGQLYF;TRA:CAASDPQVVGQLTF
clone_497_seq_2	H11_PD1_KO_clonotype1251	1	TRB:CAVGTLNYAEQFF;TRA:CAASANYGNEKITF
clone_498_seq_2	H11_PD1_KO_clonotype1252	1	TRB:CASSQDRGNTQYF;TRA:CAASDYSNNRLTL
clone_499_seq_2	H11_PD1_KO_clonotype1253	1	TRB:CASSPDWASQNTLYF;TRA:CAASWGQGGRALIF
clone_500_seq_2	H11_PD1_KO_clonotype1254	1	TRB:CASSRTSSQNTLYF;TRA:CAASAGNYAQGLTF
clone_501_seq_2	H11_PD1_KO_clonotype1255	1	TRB:CTCSARDQAPLF;TRA:CAAVTGGSNAKLTF
clone_502_seq_2	H11_PD1_KO_clonotype1256	1	TRB:CASSPRQFNQDTQYF;TRA:CAASGSGGSNAKLTF
clone_503_seq_2	H11_PD1_KO_clonotype1257	1	TRB:CASSPDWENTLYF;TRA:CAASATGANTGKLTF
clone_504_seq_2	H11_PD1_KO_clonotype1258	1	TRB:CASSALGVYEQYF;TRA:CALSDWNYQLIW
clone_505_seq_2	H11_PD1_KO_clonotype1259	1	TRB:CASSSTGDSDYTF;TRA:CALSYTNAYKVIF
clone_506_seq_2	H11_PD1_KO_clonotype1261	1	TRB:CASSLGSQDTQYF;TRA:CALNSNTGYQNFYF
clone_507_seq_2	H11_PD1_KO_clonotype1262	1	TRB:CASSLDWGLPFSQNTLYF;TRB:CASSPGANTGQLYF;TRA:CALSQQGTGSKLSF
clone_508_seq_2	H11_PD1_KO_clonotype1263	1	TRB:CASSPLGAQDTQYF;TRA:CALSNTGANTGKLTF
clone_509_seq_2	H11_PD1_KO_clonotype1264	1	TRB:CASSYWGGSYEQYF;TRA:CALRVNQGGSAKLIF
clone_510_seq_2	H11_PD1_KO_clonotype1265	1	TRB:CASSPSTDYEQYF;TRA:CALSDPGANTGKLTF
clone_511_seq_2	H11_PD1_KO_clonotype1266	1	TRB:CASSPGGGNTEVFF;TRA:CALRKNNNAGAKLTF
clone_512_seq_2	H11_PD1_KO_clonotype1267	1	TRB:CASSPSAETLYF
clone_513_seq_2	H11_PD1_KO_clonotype1268	1	TRB:CASSILGRKVFF
clone_514_seq_2	H11_PD1_KO_clonotype1270	1	TRA:CAVSDNYAQGLTF
clone_515_seq_2	H11_PD1_KO_clonotype1271	1	TRA:CAAHRNSNNRIFF
clone_516_seq_2	H11_PD1_KO_clonotype1272	1	TRA:CALGNSGTYQRF
clone_517_seq_2	H11_PD1_KO_clonotype1273	1	TRB:CASSLRRTSAETLYF
clone_518_seq_2	H11_PD1_KO_clonotype1274	1	TRB:CASSLELGGYAEQFF
clone_519_seq_2	H11_PD1_KO_clonotype1275	1	TRB:CASSQEDWGGSYEQYF
clone_520_seq_2	H11_PD1_KO_clonotype1276	1	TRB:CASSQEDWGGSYEQYF
clone_521_seq_2	H11_PD1_KO_clonotype1277	1	TRB:CASSQEDWGGSYEQYF
clone_522_seq_2	H11_PD1_KO_clonotype1278	1	TRB:CASSQDARGNTGQLYF
clone_523_seq_2	H11_PD1_KO_clonotype1279	1	TRB:CASSQEGWGNTGQLYF
clone_524_seq_2	H11_PD1_KO_clonotype1280	1	TRB:CASSQEGWGNTGQLYF
clone_525_seq_2	H11_PD1_KO_clonotype1281	1	TRB:CASSQEGARGAETLYF
clone_526_seq_2	H11_PD1_KO_clonotype1282	1	TRB:CASSQDIQGAGNTLYF
clone_527_seq_2	H11_PD1_KO_clonotype1283	1	TRB:CASSQDGRTGDERLFF
clone_528_seq_2	H11_PD1_KO_clonotype1284	1	TRB:CASSQDGRTGDERLFF
clone_529_seq_2	H11_PD1_KO_clonotype1285	1	TRB:CASSQDGRTGDERLFF
clone_530_seq_2	H11_PD1_KO_clonotype1286	1	TRB:CASSQDGRTGNERLFF
clone_531_seq_2	H11_PD1_KO_clonotype1287	1	TRB:CASSQDWGGGGYEQYF
clone_532_seq_2	H11_PD1_KO_clonotype1288	1	TRB:CASSQSGDWGTYEQYF
clone_533_seq_2	H11_PD1_KO_clonotype1289	1	TRA:CVLSAGTGGYKVVF
clone_534_seq_2	H11_PD1_KO_clonotype1290	1	TRA:CAVSEASSSFSKLVF
clone_535_seq_2	H11_PD1_KO_clonotype1291	1	TRA:CAVSEASSSFSKLVF
clone_536_seq_2	H11_PD1_KO_clonotype1293	1	TRB:CASSPTGAQDTQYF
clone_537_seq_2	H11_PD1_KO_clonotype1294	1	TRB:CASSRDWGRETLYF
clone_538_seq_2	H11_PD1_KO_clonotype1295	1	TRB:CASSDPPGAETLYF
clone_539_seq_2	H11_PD1_KO_clonotype1297	1	TRB:CASSGTISAETLYF
clone_540_seq_2	H11_PD1_KO_clonotype1298	1	TRB:CASSLDSSGNTLYF
clone_541_seq_2	H11_PD1_KO_clonotype1299	1	TRB:CASSLEGQGYEQYF
clone_542_seq_2	H11_PD1_KO_clonotype1300	1	TRB:CASSLEGSLYEQYF
clone_543_seq_2	H11_PD1_KO_clonotype1302	1	TRB:CASSLGDRYAEQFF
clone_544_seq_2	H11_PD1_KO_clonotype1303	1	TRB:CASSLTGGAWEQYF
clone_545_seq_2	H11_PD1_KO_clonotype1304	1	TRB:CASSLGAGQDTQYF
clone_546_seq_2	H11_PD1_KO_clonotype1305	1	TRB:CASSFRTGFTEVFF
clone_547_seq_2	H11_PD1_KO_clonotype1306	1	TRB:CASSTTGGAWAEQFF
clone_548_seq_2	H11_PD1_KO_clonotype1307	1	TRB:CASSTTGGAWAEQFF
clone_549_seq_2	H11_PD1_KO_clonotype1308	1	TRB:CASSRDPDWGYEQYF
clone_550_seq_2	H11_PD1_KO_clonotype1309	1	TRB:CASSSPGTGKDTQYF
clone_551_seq_2	H11_PD1_KO_clonotype1311	1	TRB:CASSSPGTGKDTQYF
clone_552_seq_2	H11_PD1_KO_clonotype1312	1	TRB:CASSRGAGGVSEQFF
clone_553_seq_2	H11_PD1_KO_clonotype1313	1	TRB:CASSQGQGAYTQYF
clone_554_seq_2	H11_PD1_KO_clonotype1316	1	TRB:CASSDGTGVYEQYF
clone_555_seq_2	H11_PD1_KO_clonotype1317	1	TRB:CASSLEGIYAEQFF
clone_556_seq_2	H11_PD1_KO_clonotype1318	1	TRB:CASSLGTGGDTQYF
clone_557_seq_2	H11_PD1_KO_clonotype1319	1	TRB:CASSLVRDAETLYF
clone_558_seq_2	H11_PD1_KO_clonotype1320	1	TRB:CASSFWGPSYEQYF
clone_559_seq_2	H11_PD1_KO_clonotype1321	1	TRB:CASSLQGQNSPLYF
clone_560_seq_2	H11_PD1_KO_clonotype1322	1	TRB:CASSLHRAGTEVFF
clone_561_seq_2	H11_PD1_KO_clonotype1323	1	TRB:CASSLEGWDTEVFF
clone_562_seq_2	H11_PD1_KO_clonotype1324	1	TRB:CASSLGQGAETLYF
clone_563_seq_2	H11_PD1_KO_clonotype1325	1	TRB:CASSLGDRGAEQFF
clone_564_seq_2	H11_PD1_KO_clonotype1326	1	TRB:CASSLLVNQDTQYF
clone_565_seq_2	H11_PD1_KO_clonotype1327	1	TRB:CASSPTGTNTEVFF
clone_566_seq_2	H11_PD1_KO_clonotype1328	1	TRB:CASSFGWGEGTQYF
clone_567_seq_2	H11_PD1_KO_clonotype1329	1	TRB:CASRLGGTNTEVFF
clone_568_seq_2	H11_PD1_KO_clonotype1330	1	TRB:CASSLTGGPYEQYF
clone_569_seq_2	H11_PD1_KO_clonotype1331	1	TRB:CASSLGTNTGQLYF
clone_570_seq_2	H11_PD1_KO_clonotype1332	1	TRB:CASSLWGGTGQLYF
clone_571_seq_2	H11_PD1_KO_clonotype1333	1	TRB:CASSDPPRGYNNQAPLF
clone_572_seq_2	H11_PD1_KO_clonotype1334	1	TRB:CASSDPPRGYNNQAPLF
clone_573_seq_2	H11_PD1_KO_clonotype1335	1	TRB:CASSDPPRGYNNQAPLF
clone_574_seq_2	H11_PD1_KO_clonotype1336	1	TRB:CASSQEGGRWAEQFF
clone_575_seq_2	H11_PD1_KO_clonotype1337	1	TRB:CASSQDLGASYEQYF
clone_576_seq_2	H11_PD1_KO_clonotype1338	1	TRB:CASSQDGGGNQAPLF
clone_577_seq_2	H11_PD1_KO_clonotype1339	1	TRB:CASSQGTGSSYEQYF
clone_578_seq_2	H11_PD1_KO_clonotype1340	1	TRB:CASSQGTGSSYEQYF
clone_579_seq_2	H11_PD1_KO_clonotype1341	1	TRB:CASSQGTGSSYEQYF
clone_580_seq_2	H11_PD1_KO_clonotype1342	1	TRB:CASSRHWGGRGEQYF
clone_581_seq_2	H11_PD1_KO_clonotype1343	1	TRB:CASTRLGGSAETLYF
clone_582_seq_2	H11_PD1_KO_clonotype1344	1	TRB:CASSRQGSSAETLYF
clone_583_seq_2	H11_PD1_KO_clonotype1345	1	TRB:CASSRQGSSAETLYF
clone_584_seq_2	H11_PD1_KO_clonotype1346	1	TRB:CASSRQGGNYAEQFF
clone_585_seq_2	H11_PD1_KO_clonotype1347	1	TRB:CASSLGTGNDERLFF
clone_586_seq_2	H11_PD1_KO_clonotype1348	1	TRB:CASSLGTGNDERLFF
clone_587_seq_2	H11_PD1_KO_clonotype1350	1	TRB:CASSLGTGNDERLFF
clone_588_seq_2	H11_PD1_KO_clonotype1351	1	TRB:CASSLGGAVAETLYF
clone_589_seq_2	H11_PD1_KO_clonotype1352	1	TRB:CASSLGGAVAETLYF
clone_590_seq_2	H11_PD1_KO_clonotype1353	1	TRB:CASSSDWGNYAEQFF
clone_591_seq_2	H11_PD1_KO_clonotype1354	1	TRB:CASSCRDRVHAEQFF
clone_592_seq_2	H11_PD1_KO_clonotype1355	1	TRB:CASSQGGASAETLYF
clone_593_seq_2	H11_PD1_KO_clonotype1356	1	TRB:CASSQGGASAETLYF
clone_594_seq_2	H11_PD1_KO_clonotype1357	1	TRB:CSSSQGGATGQLYF
clone_595_seq_2	H11_PD1_KO_clonotype1358	1	TRB:CTCSRTIQDTQYF
clone_596_seq_2	H11_PD1_KO_clonotype1359	1	TRB:CTCSANSGNTLYF
clone_597_seq_2	H11_PD1_KO_clonotype1360	1	TRB:CTCSAGMNTEVFF
clone_598_seq_2	H11_PD1_KO_clonotype1361	1	TRB:CTCSAVGDTEVFF
clone_599_seq_2	H11_PD1_KO_clonotype1362	1	TRB:CTCSAGGAETLYF
clone_600_seq_2	H11_PD1_KO_clonotype1363	1	TRB:CTCSAGGAETLYF
clone_601_seq_2	H11_PD1_KO_clonotype1364	1	TRB:CTCSAGGAETLYF
clone_602_seq_2	H11_PD1_KO_clonotype1365	1	TRB:CASSPDWGANYAEQFF;TRA:CAAPNTNKVVF;TRA:CATDTNAYKVIF
clone_603_seq_2	H11_PD1_KO_clonotype1366	1	TRB:CASSPDWGGAVYEQYF;TRA:CAAVNYAQGLTF
clone_604_seq_2	H11_PD1_KO_clonotype1367	1	TRB:CASSLGTGVYEQYF;TRA:CILTGQGGSAKLIF
clone_605_seq_2	H11_PD1_KO_clonotype1368	1	TRB:CASSSGTGGETLYF;TRA:CAVVVSNNRIFF
clone_606_seq_2	H11_PD1_KO_clonotype1369	1	TRB:CASSWGQGQNTLYF;TRA:CALERNNNAPRF
clone_607_seq_2	H11_PD1_KO_clonotype1370	1	TRB:CASSLGQPNSDYTF;TRA:CAANQGGRALIF
clone_608_seq_2	H11_PD1_KO_clonotype1371	1	TRB:CASSLVNSGNTLYF;TRA:CAAGNAGAKLTF
clone_609_seq_2	H11_PD1_KO_clonotype1372	1	TRB:CASTPGHNYAEQFF;TRA:CALNYNQGKLIF
clone_610_seq_2	H11_PD1_KO_clonotype1373	1	TRB:CASSLGLNQDTQYF;TRA:CATDDSGYNKLTF
clone_611_seq_2	H11_PD1_KO_clonotype1375	1	TRB:CASSQEGDWGYEQYF;TRB:CASSRPGQGSNSDYTF;TRA:CAAEKNQGKLIF
clone_612_seq_2	H11_PD1_KO_clonotype1376	1	TRB:CASSWGLGGSYEQYF;TRA:CAAGNMGYKLTF
clone_613_seq_2	H11_PD1_KO_clonotype1377	1	TRB:CASSLDRTSAETLYF;TRA:CAIDNNYAQGLTF
clone_614_seq_2	H11_PD1_KO_clonotype1378	1	TRB:CASSYLGTNTGQLYF;TRA:CAAENTNTGKLTF
clone_615_seq_2	H11_PD1_KO_clonotype1380	1	TRB:CASSSGRGQDTQYF;TRB:CASSWGSANTEVFF;TRA:CALERGSNYQLIW;TRA:CALGGDSNYQLIW
clone_616_seq_2	H11_PD1_KO_clonotype1381	1	TRB:CASSWGSANTEVFF;TRA:CALERGSNYQLIW
clone_617_seq_2	H11_PD1_KO_clonotype1382	1	TRB:CASSFFRANSDYTF;TRA:CAMNQGGSAKLIF
clone_618_seq_2	H11_PD1_KO_clonotype1383	1	TRB:CASSDPPRGYNNQAPLF;TRB:CASSIGQGDTEVFF;TRA:CIVTDIGYSNNRLTL
clone_619_seq_2	H11_PD1_KO_clonotype1384	1	TRB:CASSQDPGRVDTQYF;TRA:CAALYQGGRALIF
clone_620_seq_2	H11_PD1_KO_clonotype1385	1	TRB:CASRRDWGDQDTQYF;TRA:CAIDRPNTGKLTF
clone_621_seq_2	H11_PD1_KO_clonotype1386	1	TRB:CASSTGAGGAETLYF;TRA:CAIDDNMGYKLTF
clone_622_seq_2	H11_PD1_KO_clonotype1388	1	TRB:CASSLSSYEQYF;TRA:CAIDRTSSGQKLVF
clone_623_seq_2	H11_PD1_KO_clonotype1389	1	TRB:CASSMGADTQYF;TRA:CALGRSSNTNKVVF
clone_624_seq_2	H11_PD1_KO_clonotype1390	1	TRB:CASSPRGTEVFF;TRA:CAAERGSSGNKLIF
clone_625_seq_2	H11_PD1_KO_clonotype1391	1	TRB:CASSQEGRTGSYEQYF;TRA:CAAEFMSNYNVLYF
clone_626_seq_2	H11_PD1_KO_clonotype1392	1	TRB:CASSLGLGSSAETLYF;TRA:CAADRGSSGNKLIF
clone_627_seq_2	H11_PD1_KO_clonotype1394	1	TRB:CASSLNWGQDTQYF;TRB:CASSLRGRDNQAPLF;TRA:CAAEDGSSGNKLIF
clone_628_seq_2	H11_PD1_KO_clonotype1395	1	TRB:CASSLDGANSDYTF;TRA:CATNTGYQNFYF
clone_629_seq_2	H11_PD1_KO_clonotype1397	1	TRB:CASSRDWANTGQLYF;TRA:CALEPGTNAYKVIF
clone_630_seq_2	H11_PD1_KO_clonotype1398	1	TRB:CASSLRDRRSDYTF;TRA:CALELGEGADRLTF
clone_631_seq_2	H11_PD1_KO_clonotype1399	1	TRB:CASSVQGSAETLYF;TRA:CAAEGITNTGKLTF
clone_632_seq_2	H11_PD1_KO_clonotype1400	1	TRB:CASSSEVSQDTQYF;TRA:CAASEGYQNFYF
clone_633_seq_2	H11_PD1_KO_clonotype1401	1	TRB:CASSLTLSAETLYF;TRA:CATNTGYQNFYF
clone_634_seq_2	H11_PD1_KO_clonotype1402	1	TRB:CASSLGTGGYEQYF;TRA:CAMESGANTGKLTF
clone_635_seq_2	H11_PD1_KO_clonotype1403	1	TRB:CASSYPGQGGEVFF;TRA:CAAIASSSFSKLVF
clone_636_seq_2	H11_PD1_KO_clonotype1404	1	TRB:CASGDRTGGSSYEQYF;TRA:CALVQQGTGSKLSF
clone_637_seq_2	H11_PD1_KO_clonotype1406	1	TRB:CASSQEEGARTEVFF;TRA:CAASNNRIFF
clone_638_seq_2	H11_PD1_KO_clonotype1407	1	TRB:CASSLTGGGQDTQYF;TRA:CAAYYGSSGNKLIF
clone_639_seq_2	H11_PD1_KO_clonotype1408	1	TRB:CASSRTGRSAETLYF;TRA:CAAEAMSNYNVLYF
clone_640_seq_2	H11_PD1_KO_clonotype1409	1	TRB:CASSVGGRSAETLYF;TRA:CAAEVMSNYNVLYF
clone_641_seq_2	H11_PD1_KO_clonotype1410	1	TRB:CASSSTGGGYAEQFF;TRA:CAVSMGNNRIFF
clone_642_seq_2	H11_PD1_KO_clonotype1411	1	TRB:CSSSQLGGGAEQFF;TRA:CAASTQNFYF
clone_643_seq_2	H11_PD1_KO_clonotype1413	1	TRB:CASSPRTGENSPLYF;TRA:CATDRQGGRALIF
clone_644_seq_2	H11_PD1_KO_clonotype1414	1	TRB:CASSQEGRTGVTEVFF;TRA:CAVSASNNNAPRF
clone_645_seq_2	H11_PD1_KO_clonotype1415	1	TRB:CASSSGQGSTEVFF;TRA:CARTSGGNYKPTF
clone_646_seq_2	H11_PD1_KO_clonotype1416	1	TRB:CASSLRQINTEVFF;TRA:CAASNTGYQNFYF
clone_647_seq_2	H11_PD1_KO_clonotype1417	1	TRB:CASSFSGEDSDYTF;TRA:CALNTGKLTF;TRA:CAVSEGPNTGKLTF
clone_648_seq_2	H11_PD1_KO_clonotype1418	1	TRB:CASSRADRARNTLYF;TRA:CAASYQGGRALIF
clone_649_seq_2	H11_PD1_KO_clonotype1419	1	TRB:CASSRGTTNTGQLYF;TRA:CAASMAGSFNKLTF;TRA:CAMEETGFASALTF
clone_650_seq_2	H11_PD1_KO_clonotype1420	1	TRB:CASSPAFSNERLFF;TRA:CAASENSGTYQRF
clone_651_seq_2	H11_PD1_KO_clonotype1422	1	TRB:CASSLSSGVTEVFF;TRA:CAVNGTGGYKVVF;TRA:CAVSPNTNTGKLTF
clone_652_seq_2	H11_PD1_KO_clonotype1423	1	TRB:CASSLGTANSDYTF;TRA:CAPEALNYNQGKLIF;TRA:CAVSIQGGRALIF
clone_653_seq_2	H11_PD1_KO_clonotype1424	1	TRB:CASRGQGLSYEQYF;TRB:CASSIAPGSISNERLFF;TRA:CAMEPGGYKVVF;TRA:CATGSSGSWQLIF
clone_654_seq_2	H11_PD1_KO_clonotype1425	1	TRB:CASSRLGGQDTQYF;TRA:CAENSNNRIFF
clone_655_seq_2	H11_PD1_KO_clonotype1426	1	TRB:CASSFYGRGSDYTF;TRA:CALSLSNYNVLYF
clone_656_seq_2	H11_PD1_KO_clonotype1427	1	TRB:CASSFGDKNSDYTF;TRA:CAVYNTNTGKLTF
clone_657_seq_2	H11_PD1_KO_clonotype1428	1	TRB:CASSPTGGTETLYF;TRA:CALERGGFASALTF
clone_658_seq_2	H11_PD1_KO_clonotype1429	1	TRB:CASSFWGGAETLYF;TRA:CAMRGSYAQGLTF;TRA:CAVSEHSNNRIFF
clone_659_seq_2	H11_PD1_KO_clonotype1430	1	TRB:CASGPGLGSSAETLYF;TRB:CASSDAWGLSAETLYF;TRA:CALSPHMGYKLTF
clone_660_seq_2	H11_PD1_KO_clonotype1431	1	TRB:CASSQDLGSAETLYF;TRA:CAVSPSAGNKLTF
clone_661_seq_2	H11_PD1_KO_clonotype1432	1	TRB:CTCSAGNYAEQFF;TRA:CALSDSPGSKLSF
clone_662_seq_2	H11_PD1_KO_clonotype1433	1	TRB:CTCSVNNYAEQFF;TRA:CAASDPNTNKVVF
clone_663_seq_2	H11_PD1_KO_clonotype1434	1	TRB:CASSPQTGQLYF;TRA:CAVSSNYGNEKITF
clone_664_seq_2	H11_PD1_KO_clonotype1435	1	TRB:CASGDEGTVQAPLF;TRB:CASSQDGRTGNERLFF;TRA:CAAEVVGNTGYQNFYF;TRA:CATDGASSSFSKLVF
clone_665_seq_2	H11_PD1_KO_clonotype1436	1	TRB:CASSIAGSQNTLYF;TRB:CAWSLAGALSYNSPLYF;TRA:CAASEGGSGGKLTL;TRA:CALSDNAGAKLTF
clone_666_seq_2	H11_PD1_KO_clonotype1437	1	TRB:CASSPLGGRYEQYF;TRA:CAASRSNNRIFF
clone_667_seq_2	H11_PD1_KO_clonotype1438	1	TRB:CASSLQGATAEQFF;TRA:CAVSITSGSWQLIF
clone_668_seq_2	H11_PD1_KO_clonotype1439	1	TRB:CASSSTASAETLYF;TRA:CAVIGTGGYKVVF
clone_669_seq_2	H11_PD1_KO_clonotype1440	1	TRB:CASSLLGSAETLYF;TRA:CALSPNSGTYQRF
clone_670_seq_2	H11_PD1_KO_clonotype1441	1	TRB:CASSLGTGAYEQYF;TRA:CAAKTSGGNYKPTF
clone_671_seq_2	H11_PD1_KO_clonotype1442	1	TRB:CASSLGAGQDTQYF;TRA:CAASQRSAKLIF
clone_672_seq_2	H11_PD1_KO_clonotype1443	1	TRB:CASSPQGANTEVFF;TRA:CVLSANSGTYQRF
clone_673_seq_2	H11_PD1_KO_clonotype1444	1	TRB:CASSLMTLNTEVFF;TRA:CAVSPDTNAYKVIF
clone_674_seq_2	H11_PD1_KO_clonotype1445	1	TRB:CASSLPGQGAEVFF;TRA:CAMIRTQVVGQLTF
clone_675_seq_2	H11_PD1_KO_clonotype1446	1	TRB:CASSGDSSAETLYF;TRA:CALSPYTNTGKLTF
clone_676_seq_2	H11_PD1_KO_clonotype1447	1	TRB:CASSSQINQDTQYF;TRA:CAASHNTNTGKLTF
clone_677_seq_2	H11_PD1_KO_clonotype1448	1	TRB:CASKGQGAAETLYF;TRB:CASSYGLGVYEQYF;TRA:CAVSTTASLGKLQF
clone_678_seq_2	H11_PD1_KO_clonotype1449	1	TRB:CASSFVDNYAEQFF;TRA:CAVRDSNYQLIW
clone_679_seq_2	H11_PD1_KO_clonotype1451	1	TRB:CASSPGQGNTEVFF;TRB:CASSSQGAGGERLFF;TRA:CALEGPPGANTGKLTF;TRA:CAMRSRNSNNRIFF
clone_680_seq_2	H11_PD1_KO_clonotype1453	1	TRB:CASSLGTGSPWLYF;TRA:CAVNNAGAKLTF
clone_681_seq_2	H11_PD1_KO_clonotype1454	1	TRB:CASSQETVSNERLFF;TRA:CAVRANSAGNKLTF
clone_682_seq_2	H11_PD1_KO_clonotype1455	1	TRB:CASSQGYSYNSPLYF;TRA:CAMAAIASSSFSKLVF
clone_683_seq_2	H11_PD1_KO_clonotype1456	1	TRB:CASSPGQGAYTEVFF;TRA:CAVSIEGYAQGLTF
clone_684_seq_2	H11_PD1_KO_clonotype1457	1	TRB:CASSQDPGQQDTQYF;TRA:CALTFQGKLIF
clone_685_seq_2	H11_PD1_KO_clonotype1458	1	TRB:CTCSAHSYAEQFF;TRA:CVLSAWSNNRIFF
clone_686_seq_2	H11_PD1_KO_clonotype1459	1	TRB:CTCSAGGWNTLYF;TRA:CAVYYSNNRLTL
clone_687_seq_2	H11_PD1_KO_clonotype1460	1	TRB:CASSKTVNTLYF;TRA:CAVNHNYAQGLTF
clone_688_seq_2	H11_PD1_KO_clonotype1461	1	TRB:CASSLNILNTGQLYF;TRA:CAVSYTGYQNFYF
clone_689_seq_2	H11_PD1_KO_clonotype1463	1	TRB:CASSLWQGAGNTLYF;TRB:CGARNSHGTGENQDTQYF;TRA:CAASESNTGNYKYVF
clone_690_seq_2	H11_PD1_KO_clonotype1464	1	TRB:CASSQTSDRVDTEVFF;TRA:CALGGYSNNRIFF
clone_691_seq_2	H11_PD1_KO_clonotype1465	1	TRB:CASSQDAGGAYAEQFF;TRA:CAVSMGTQVVGQLTF
clone_692_seq_2	H11_PD1_KO_clonotype1466	1	TRB:CASSHHGLGVQNTLYF;TRA:CAVRGSALGRLHF
clone_693_seq_2	H11_PD1_KO_clonotype1467	1	TRB:CASSLLDTNERLFF;TRA:CAVSIPGGNYKPTF
clone_694_seq_2	H11_PD1_KO_clonotype1468	1	TRB:CASSLETGFYEQYF;TRA:CAASELASSGQKLVF
clone_695_seq_2	H11_PD1_KO_clonotype1469	1	TRB:CASSLGLGQDTQYF;TRA:CAVGIASSSFSKLVF
clone_696_seq_2	H11_PD1_KO_clonotype1470	1	TRB:CASSFTGGPETLYF;TRA:CATDPLSGSFNKLTF
clone_697_seq_2	H11_PD1_KO_clonotype1471	1	TRB:CASSRPGQGSYEQYF;TRA:CAVSATGNYKYVF
clone_698_seq_2	H11_PD1_KO_clonotype1473	1	TRB:CASSPLGGRYEQYF;TRA:CAVSMRGYNQGKLIF
clone_699_seq_2	H11_PD1_KO_clonotype1474	1	TRB:CASSGDWGKDTQYF;TRA:CAARGSALGRLHF
clone_700_seq_2	H11_PD1_KO_clonotype1475	1	TRB:CASSLVGWTGQLYF;TRA:CAVGMGGTGSKLSF
clone_701_seq_2	H11_PD1_KO_clonotype1476	1	TRB:CASSWTGTGNTLYF;TRA:CALSGSNNRIFF
clone_702_seq_2	H11_PD1_KO_clonotype1477	1	TRB:CASSLTGANTEVFF;TRA:CAVRAFSNTNKVVF
clone_703_seq_2	H11_PD1_KO_clonotype1478	1	TRB:CASSFWTGGNTLYF;TRA:CAVRANYGNEKITF
clone_704_seq_2	H11_PD1_KO_clonotype1479	1	TRB:CASSEDWGANYAEQFF;TRA:CALDNMGYKLTF
clone_705_seq_2	H11_PD1_KO_clonotype1480	1	TRB:CASSQDRTGGWEQYF;TRA:CALGDTNAYKVIF
clone_706_seq_2	H11_PD1_KO_clonotype1481	1	TRB:CASSQEGYNYAEQFF;TRA:CATPRTNSAGNKLTF
clone_707_seq_2	H11_PD1_KO_clonotype1482	1	TRB:CSSRAGTGGQAPLF;TRA:CAVRRTGNYKYVF
clone_708_seq_2	H11_PD1_KO_clonotype1484	1	TRB:CTCSVNSQNTLYF;TRA:CALSAYGNEKITF
clone_709_seq_2	H11_PD1_KO_clonotype1485	1	TRB:CASSQRLGGDPYEQYF;TRA:CAASEHGSGSFNKLTF;TRA:CAASENYSNNRLTL
clone_710_seq_2	H11_PD1_KO_clonotype1486	1	TRB:CASSSTGGGYEQYF;TRA:CALGDNYGNEKITF
clone_711_seq_2	H11_PD1_KO_clonotype1487	1	TRB:CASSLRGGYAEQFF;TRA:CALVNSNYQLIW
clone_712_seq_2	H11_PD1_KO_clonotype1488	1	TRB:CASSLELGGYEQYF;TRA:CAASGGSSGNKLIF
clone_713_seq_2	H11_PD1_KO_clonotype1489	1	TRB:CASSRTGGQNTLYF;TRB:CASSWTGQDTQYF;TRA:CALSRTSGGNYKPTF
clone_714_seq_2	H11_PD1_KO_clonotype1490	1	TRB:CASSSPGTGKDTQYF;TRB:CASSYYWGGDAEQFF;TRA:CALGERNNNNAPRF;TRA:CALSAVDTNAYKVIF
clone_715_seq_2	H11_PD1_KO_clonotype1491	1	TRB:CASSPDLNQDTQYF;TRA:CAAMTNSAGNKLTF
clone_716_seq_2	H11_PD1_KO_clonotype1492	1	TRB:CASSAGQGNTEVFF;TRA:CALSQQGTGSKLSF
clone_717_seq_2	H11_PD1_KO_clonotype1493	1	TRB:CASSLRWGGYEQYF;TRA:CAMRDRRGTGYQNFYF
clone_718_seq_2	H11_PD1_KO_clonotype1494	1	TRB:CASSPTGPNTEVFF;TRA:CALKGSYGNEKITF
clone_719_seq_2	H11_PD1_KO_clonotype1495	1	TRB:CASSLDIYNSPLYF;TRA:CAVRIPGSGGKLTL
clone_720_seq_2	H11_PD1_KO_clonotype1496	1	TRB:CASSGLGGLAEQFF;TRA:CAVSADNYAQGLTF
clone_721_seq_2	H11_PD1_KO_clonotype1497	1	TRB:CASSGTGGGNSYEQYF;TRA:CAVSYNNYAQGLTF
clone_722_seq_2	H11_PD1_KO_clonotype1498	1	TRB:CASSEATGGVNYAEQFF;TRA:CALRYNYAQGLTF
clone_723_seq_2	H11_PD1_KO_clonotype1499	1	TRB:CASSQTGTSQNTLYF;TRA:CAASHYSNNRLTL;TRA:CALSSLPGTGSNRLTF
clone_724_seq_2	H11_PD1_KO_clonotype1500	1	TRB:CASSWTGGAQNTLYF;TRA:CALRNNYAQGLTF
clone_725_seq_2	H11_PD1_KO_clonotype1501	1	TRB:CASSLSGGADTEVFF;TRA:CVVGDRGSALGRLHF
clone_726_seq_2	H11_PD1_KO_clonotype1502	1	TRB:CASSLVGGRTGQLYF;TRA:CALGDRNYNQGKLIF
clone_727_seq_2	H11_PD1_KO_clonotype1504	1	TRB:CASSQDPLGGQDTQYF;TRA:CALGDLEAGNEKITF
clone_728_seq_2	H11_PD1_KO_clonotype1505	1	TRB:CASSSPGGAYEQYF;TRA:CALGPTGANTGKLTF
clone_729_seq_2	H11_PD1_KO_clonotype1506	1	TRB:CASSLEANTGQLYF;TRA:CAASEAAGNTGKLIF
clone_730_seq_2	H11_PD1_KO_clonotype1507	1	TRB:CASSLAKNTGQLYF;TRA:CALGDRSNNRIFF
clone_731_seq_2	H11_PD1_KO_clonotype1508	1	TRB:CASSQSTANTEVFF;TRA:CALSDRGTGANTGKLTF
clone_732_seq_2	H11_PD1_KO_clonotype1509	1	TRB:CASSLPGTGNEQYF;TRA:CALGDLASGSWQLIF;TRA:CAVSAGGGSALGRLHF
clone_733_seq_2	H11_PD1_KO_clonotype1510	1	TRB:CASSQEGGSQNTLYF;TRA:CAASRGGSALGRLHF
clone_734_seq_2	H11_PD1_KO_clonotype1511	1	TRB:CASSPGLNYAEQFF;TRA:CAMREVNTGNYKYVF
clone_735_seq_2	H11_PD1_KO_clonotype1512	1	TRB:CASSLTGGSYEQYF;TRA:CALAQTNSAGNKLTF
clone_736_seq_2	H11_PD1_KO_clonotype1513	1	TRB:CASSRVWGGEDEQYF;TRA:CALGVTGNTGKLIF
clone_737_seq_2	H11_PD1_KO_clonotype1514	1	TRB:CASSLTGSAETLYF;TRA:CALISSPDTNAYKVIF
clone_738_seq_2	H11_PD1_KO_clonotype1515	1	TRB:CASSDRDWGGANTLYF;TRA:CALSHRNNYAQGLTF
clone_739_seq_2	H11_PD1_KO_clonotype1516	1	TRB:CTCSATGPDTQYF;TRA:CAMIPSSGSWQLIF
clone_740_seq_2	H11_PD1_KO_clonotype1517	1	TRB:CAWSPRLGGGSQNTLYF;TRA:CALGALLSGSFNKLTF
clone_741_seq_2	H11_PD1_KO_clonotype1518	1	TRB:CASSPGHANTEVFF;TRA:CAMREGSSSGSWQLIF
clone_742_seq_2	H11_PD1_KO_clonotype1519	1	TRB:CASSLEGGLFEQYF;TRA:CALGTYYGSSGNKLIF
clone_743_seq_2	H11_PD1_KO_clonotype1520	1	TRB:CASSIPNTEVFF;TRA:CAASHTGYQNFYF
clone_744_seq_2	H11_PD1_KO_clonotype1521	1	TRB:CASSSTPSQNTLYF;TRA:CAARDGNEKITF
clone_745_seq_2	H11_PD1_KO_clonotype1522	1	TRB:CASSFRDWGVEQYF;TRA:CAASDTNTGKLTF
clone_746_seq_2	H11_PD1_KO_clonotype1523	1	TRB:CASSSGQGEDTQYF;TRA:CAARANTNKVVF
clone_747_seq_2	H11_PD1_KO_clonotype1524	1	TRB:CASSLETSQNTLYF;TRA:CAASDGTGSKLSF
clone_748_seq_2	H11_PD1_KO_clonotype1525	1	TRB:CASSKTAETLYF;TRA:CAASLNMGYKLTF
clone_749_seq_2	H11_PD1_KO_clonotype1526	1	TRB:CASSAGTGTERLFF;TRA:CAAGDTGANTGKLTF
clone_750_seq_2	H11_PD1_KO_clonotype1527	1	TRB:CASSWGTGTETLYF;TRA:CAAGMATGGNNKLTF
clone_751_seq_2	H11_PD1_KO_clonotype1528	1	TRB:CASSLAQTNTEVFF;TRA:CAASRPSGQKLVF
clone_752_seq_2	H11_PD1_KO_clonotype1529	1	TRB:CASSFPGSQNTLYF;TRA:CAAPNYGNEKITF
clone_753_seq_2	H11_PD1_KO_clonotype1530	1	TRB:CASGDATGGDTQYF;TRB:CASSLVISNERLFF;TRA:CAASESGYNKLTF
clone_754_seq_2	H11_PD1_KO_clonotype1531	1	TRB:CASSDAPGASGNTLYF;TRA:CAASEAGYNKLTF
clone_755_seq_2	H11_PD1_KO_clonotype1532	1	TRB:CASSTRDQDTQYF;TRB:CTCSAQGNSPLYF;TRA:CAASHNTNTGKLTF
clone_756_seq_2	H11_PD1_KO_clonotype1533	1	TRB:CTCSARGNSDYTF;TRA:CAASEGGNEKITF
clone_757_seq_2	H11_PD1_KO_clonotype1534	1	TRB:CTCSSTGNSDYTF;TRA:CAASSGGNNKLTF
clone_758_seq_2	H11_PD1_KO_clonotype1535	1	TRB:CASSRENTEVFF;TRA:CALSDRFFRGQQGTGSKLSF
clone_759_seq_2	H11_PD1_KO_clonotype1536	1	TRB:CASSLPGGNTEVFF;TRA:CAASKENAGAKLTF
clone_760_seq_2	H11_PD1_KO_clonotype1537	1	TRB:CASSLDRGQDTQYF;TRA:CAASRGDYSNNRLTL
clone_761_seq_2	H11_PD1_KO_clonotype1538	1	TRB:CASGVGTGVNQDTQYF;TRB:CASSLAGGSAETLYF;TRA:CAASNTGANTGKLTF
clone_762_seq_2	H11_PD1_KO_clonotype1539	1	TRB:CASSQERTANTEVFF;TRA:CAASEGSALGRLHF
clone_763_seq_2	H11_PD1_KO_clonotype1540	1	TRB:CASSQDGTDNERLFF;TRA:CAASDYGSSGNKLIF
clone_764_seq_2	H11_PD1_KO_clonotype1541	1	TRB:CTCSAFRDWGEYF;TRA:CAASAASSFSKLVF
clone_765_seq_2	H11_PD1_KO_clonotype1542	1	TRB:CASSSDSNTGQLYF;TRA:CAASARDTNAYKVIF
clone_766_seq_2	H11_PD1_KO_clonotype1543	1	TRB:CASSLDSQPSDYTF;TRA:CAASAQDTNAYKVIF
clone_767_seq_2	H11_PD1_KO_clonotype1544	1	TRB:CAWSLAGALSYNSPLYF;TRA:CALSDNAGAKLTF
clone_768_seq_2	H11_PD1_KO_clonotype1545	1	TRB:CASSRQLSNERLFF;TRA:CALSDRGGSNYKLTF
clone_769_seq_2	H11_PD1_KO_clonotype1546	1	TRB:CASSQAPINNQAPLF;TRA:CALSEFGGSNYKLTF
clone_770_seq_2	H11_PD1_KO_clonotype1548	1	TRA:CAVRVTGSGGKLTL
clone_771_seq_2	H11_PD1_KO_clonotype1549	1	TRB:CASSITNQDTQYF
clone_772_seq_2	H11_PD1_KO_clonotype1551	1	TRB:CASSIDSSYEQYF
clone_773_seq_2	H11_PD1_KO_clonotype1552	1	TRB:CASSIDRNSDYTF
clone_774_seq_2	H11_PD1_KO_clonotype1553	1	TRB:CASSMEGSYEQYF
clone_775_seq_2	H11_PD1_KO_clonotype1554	1	TRB:CASSMGQYTEVFF
clone_776_seq_2	H11_PD1_KO_clonotype1555	1	TRB:CASVRLGAETLYF
clone_777_seq_2	H11_PD1_KO_clonotype1557	1	TRA:CAVSPMSNYNVLYF
clone_778_seq_2	H11_PD1_KO_clonotype1558	1	TRB:CASSSPPQNSAETLYF
clone_779_seq_2	H11_PD1_KO_clonotype1559	1	TRB:CASSLTGTGENSPLYF
clone_780_seq_2	H11_PD1_KO_clonotype1560	1	TRB:CASSLPGIYNYAEQFF
clone_781_seq_2	H11_PD1_KO_clonotype1561	1	TRB:CASSLDRGRFQDTQYF
clone_782_seq_2	H11_PD1_KO_clonotype1562	1	TRB:CASSLLGEGSGNTLYF
clone_783_seq_2	H11_PD1_KO_clonotype1563	1	TRA:CALRGVYGSSGNKLIF
clone_784_seq_2	H11_PD1_KO_clonotype1564	1	TRA:CVLSATNSAGNKLTF
clone_785_seq_2	H11_PD1_KO_clonotype1565	1	TRA:CAISTGNTGKLIF
clone_786_seq_2	H11_PD1_KO_clonotype1566	1	TRB:CASSTSGTGGVEQYF
clone_787_seq_2	H11_PD1_KO_clonotype1567	1	TRB:CASSSQGSSAETLYF
clone_788_seq_2	H11_PD1_KO_clonotype1568	1	TRB:CASSSGTASQNTLYF
clone_789_seq_2	H11_PD1_KO_clonotype1571	1	TRB:CASSLDWGNTGQLYF
clone_790_seq_2	H11_PD1_KO_clonotype1572	1	TRB:CASSLEGRSNQAPLF
clone_791_seq_2	H11_PD1_KO_clonotype1573	1	TRB:CASSLDGTGGYEQYF
clone_792_seq_2	H11_PD1_KO_clonotype1574	1	TRB:CASSLVGQIAETLYF
clone_793_seq_2	H11_PD1_KO_clonotype1575	1	TRB:CASSLWGFNQDTQYF
clone_794_seq_2	H11_PD1_KO_clonotype1576	1	TRB:CASSFGLFSAETLYF
clone_795_seq_2	H11_PD1_KO_clonotype1577	1	TRB:CASSFGLFSAETLYF
clone_796_seq_2	H11_PD1_KO_clonotype1578	1	TRB:CASSPRDWGSYEQYF
clone_797_seq_2	H11_PD1_KO_clonotype1579	1	TRB:CASSPGQGNYAEQFF
clone_798_seq_2	H11_PD1_KO_clonotype1580	1	TRB:CASSPRDGSNERLFF
clone_799_seq_2	H11_PD1_KO_clonotype1581	1	TRB:CASSAGGFSNERLFF
clone_800_seq_2	H11_PD1_KO_clonotype1582	1	TRB:CASSYLDRGEYEQYF
clone_801_seq_2	H11_PD1_KO_clonotype1583	1	TRB:CASSYYWGGDAEQFF
clone_802_seq_2	H11_PD1_KO_clonotype1584	1	TRB:CASSSTGGGAETLYF
clone_803_seq_2	H11_PD1_KO_clonotype1585	1	TRB:CASSLRGGIQNTLYF
clone_804_seq_2	H11_PD1_KO_clonotype1586	1	TRB:CASSLDWGGQDTQYF
clone_805_seq_2	H11_PD1_KO_clonotype1587	1	TRB:CASSLETGGADTQYF
clone_806_seq_2	H11_PD1_KO_clonotype1588	1	TRB:CASSLGGAHYAEQFF
clone_807_seq_2	H11_PD1_KO_clonotype1590	1	TRB:CASSLVGSGAETLYF
clone_808_seq_2	H11_PD1_KO_clonotype1591	1	TRB:CASSLDWGAYAEQFF
clone_809_seq_2	H11_PD1_KO_clonotype1592	1	TRB:CASRESGTTNTEVFF
clone_810_seq_2	H11_PD1_KO_clonotype1593	1	TRB:CASSLGGGNTGQLYF
clone_811_seq_2	H11_PD1_KO_clonotype1594	1	TRB:CASSLGGGNTGQLYF
clone_812_seq_2	H11_PD1_KO_clonotype1595	1	TRB:CASSLQGVGNSPLYF
clone_813_seq_2	H11_PD1_KO_clonotype1596	1	TRB:CASSLQVFSNERLFF
clone_814_seq_2	H11_PD1_KO_clonotype1597	1	TRB:CASSRDWASAETLYF
clone_815_seq_2	H11_PD1_KO_clonotype1598	1	TRB:CASRPTGTGAETLYF
clone_816_seq_2	H11_PD1_KO_clonotype1599	1	TRB:CASRGLGASAETLYF
clone_817_seq_2	H11_PD1_KO_clonotype1600	1	TRB:CASSRTGGDLYEQYF
clone_818_seq_2	H11_PD1_KO_clonotype1601	1	TRB:CASSLEGGAGNTLYF
clone_819_seq_2	H11_PD1_KO_clonotype1602	1	TRB:CASSLGLGGQNTLYF
clone_820_seq_2	H11_PD1_KO_clonotype1603	1	TRB:CASSLGGANYAEQFF
clone_821_seq_2	H11_PD1_KO_clonotype1604	1	TRB:CASSLGGANYAEQFF
clone_822_seq_2	H11_PD1_KO_clonotype1606	1	TRB:CASSQDGLGGAETLYF
clone_823_seq_2	H11_PD1_KO_clonotype1607	1	TRB:CASSPRLGALSYEQYF
clone_824_seq_2	H11_PD1_KO_clonotype1608	1	TRB:CSSSQSRAGASDYTF
clone_825_seq_2	H11_PD1_KO_clonotype1609	1	TRB:CTCSPGLGGYTLYF
clone_826_seq_2	H11_PD1_KO_clonotype1610	1	TRB:CTCSPQKSNERLFF
clone_827_seq_2	H11_PD1_KO_clonotype1612	1	TRB:CTCSADQSQNTLYF
clone_828_seq_2	H11_PD1_KO_clonotype1613	1	TRB:CTCSADRGPERLFF
clone_829_seq_2	H11_PD1_KO_clonotype1614	1	TRB:CTCSAPTGGYEQYF
clone_830_seq_2	H11_PD1_KO_clonotype1615	1	TRB:CTCSAGGRTGQLYF
clone_831_seq_2	H11_PD1_KO_clonotype1616	1	TRB:CTCSAGGRTGQLYF
clone_832_seq_2	H11_PD1_KO_clonotype1617	1	TRB:CTCSGTGGYAEQFF
clone_833_seq_2	H11_PD1_KO_clonotype1618	1	TRB:CASSIRQEDTQYF;TRA:CILRDYANKMIF
clone_834_seq_2	H11_PD1_KO_clonotype1619	1	TRB:CASSMDRAYEQYF;TRA:CAIDGGRALIF
clone_835_seq_2	H11_PD1_KO_clonotype1620	1	TRB:CASSLRWGGNQDTQYF;TRA:CALSAPYAQGLTF;TRA:CAVQGKLIF
clone_836_seq_2	H11_PD1_KO_clonotype1621	1	TRB:CASSLTGGNTGQLYF;TRA:CAKNNNNAPRF
clone_837_seq_2	H11_PD1_KO_clonotype1622	1	TRB:CASSSGQGRVETLYF;TRA:CATFASLGKLQF
clone_838_seq_2	H11_PD1_KO_clonotype1623	1	TRB:CASSFGLFSAETLYF;TRA:CATSNTGYQNFYF
clone_839_seq_2	H11_PD1_KO_clonotype1624	1	TRB:CASSAGHLSNERLFF;TRA:CAAANYAQGLTF
clone_840_seq_2	H11_PD1_KO_clonotype1625	1	TRB:CASSFRGGRQDTQYF;TRA:CAMDPGYQNFYF
clone_841_seq_2	H11_PD1_KO_clonotype1626	1	TRB:CTCSADWGGDEQYF;TRA:CAPNQGKLIF
clone_842_seq_2	H11_PD1_KO_clonotype1627	1	TRB:CTCSAAINNQAPLF;TRA:CAVNYNQGKLIF
clone_843_seq_2	H11_PD1_KO_clonotype1628	1	TRB:CTCSAGTGGGEQYF;TRA:CAASNNNNAPRF
clone_844_seq_2	H11_PD1_KO_clonotype1629	1	TRB:CASSILGDYEQYF;TRA:CAMGMSNYNVLYF
clone_845_seq_2	H11_PD1_KO_clonotype1630	1	TRB:CASSAGTGDTGQLYF;TRA:CAVSASNRIFF
clone_846_seq_2	H11_PD1_KO_clonotype1632	1	TRB:CASSLRTGVQNTLYF;TRA:CAAESSGYNKLTF
clone_847_seq_2	H11_PD1_KO_clonotype1633	1	TRB:CASSLRGGSNERLFF;TRA:CAAEVHSGTYQRF;TRA:CAVYNTNTGKLTF
clone_848_seq_2	H11_PD1_KO_clonotype1634	1	TRB:CASSLSGGYNSPLYF;TRA:CAIVDTNAYKVIF;TRA:CVVVTSNTNKVVF
clone_849_seq_2	H11_PD1_KO_clonotype1635	1	TRB:CASSLGTGGPGQLYF;TRA:CALVNNAGAKLTF
clone_850_seq_2	H11_PD1_KO_clonotype1636	1	TRB:CASSLADWGRAEQFF;TRA:CADMNYNQGKLIF
clone_851_seq_2	H11_PD1_KO_clonotype1637	1	TRB:CASSQDLGDNYAEQFF;TRA:CAVRLNNRIFF
clone_852_seq_2	H11_PD1_KO_clonotype1638	1	TRB:CASSSGTGGNNSPLYF;TRA:CAAPDYSNNRLTL
clone_853_seq_2	H11_PD1_KO_clonotype1639	1	TRB:CASRDSSQNTLYF;TRA:CAALNTEGADRLTF
clone_854_seq_2	H11_PD1_KO_clonotype1640	1	TRB:CASSVESSYEQYF;TRA:CAASGNNNRLTL
clone_855_seq_2	H11_PD1_KO_clonotype1642	1	TRB:CASSLEAGVSYEQYF;TRA:CALELATGYQNFYF
clone_856_seq_2	H11_PD1_KO_clonotype1643	1	TRB:CASSFLGGSSYEQYF;TRA:CAASRSNNRIFF
clone_857_seq_2	H11_PD1_KO_clonotype1644	1	TRB:CASSLVGGMNTEVFF;TRA:CAVSANTGKLTF
clone_858_seq_2	H11_PD1_KO_clonotype1645	1	TRB:CASSKTLGGRYAEQFF;TRA:CAAGTGGYKVVF
clone_859_seq_2	H11_PD1_KO_clonotype1647	1	TRB:CSSSQPGLGGYTLYF;TRA:CAVNTNAYKVIF
clone_860_seq_2	H11_PD1_KO_clonotype1649	1	TRB:CTCSALGGTETLYF;TRA:CAAPSGGSNAKLTF
clone_861_seq_2	H11_PD1_KO_clonotype1650	1	TRB:CTCSGGTGVYEQYF;TRA:CAAEATTNAYKVIF
clone_862_seq_2	H11_PD1_KO_clonotype1653	1	TRB:CASEPRGQGEVFF;TRA:CAVKMDSNYQLIW
clone_863_seq_2	H11_PD1_KO_clonotype1654	1	TRB:CASSLPGTGGNQAPLF;TRA:CAASVYNQGKLIF
clone_864_seq_2	H11_PD1_KO_clonotype1655	1	TRB:CASSLYPQGANSDYTF;TRA:CASNAGAKLTF;TRA:CAVTGFASALTF
clone_865_seq_2	H11_PD1_KO_clonotype1656	1	TRB:CASSRGQGTNERLFF;TRA:CAVSSQGGRALIF
clone_866_seq_2	H11_PD1_KO_clonotype1657	1	TRB:CASSLAGAGNQAPLF;TRA:CAASNYNQGKLIF
clone_867_seq_2	H11_PD1_KO_clonotype1658	1	TRB:CASSLGRKAGNTLYF;TRA:CAASINSGTYQRF
clone_868_seq_2	H11_PD1_KO_clonotype1659	1	TRB:CASRWGGASQNTLYF;TRA:CAAANSGTYQRF;TRA:CALSDLYAQGLTF
clone_869_seq_2	H11_PD1_KO_clonotype1660	1	TRB:CASGPGTGGANSDYTF;TRB:CASSLEEGFSYEQYF;TRA:CAASGYNQGKLIF
clone_870_seq_2	H11_PD1_KO_clonotype1661	1	TRB:CASSLDAGGDTEVFF;TRA:CAGGNTNTGKLTF;TRA:CAVSGDSNYQLIW
clone_871_seq_2	H11_PD1_KO_clonotype1662	1	TRB:CASRRDTYNYAEQFF;TRA:CIVTDKGYGSSGNKLIF
clone_872_seq_2	H11_PD1_KO_clonotype1663	1	TRB:CASSPGTSSAETLYF;TRA:CAASEQGQGKLIF
clone_873_seq_2	H11_PD1_KO_clonotype1664	1	TRB:CASTGAPIANTEVFF;TRA:CAAESYTGGNNKLTF
clone_874_seq_2	H11_PD1_KO_clonotype1665	1	TRB:CASSRDSISNERLFF;TRA:CALNPSSGSWQLIF;TRA:CAVIPTNAYKVIF
clone_875_seq_2	H11_PD1_KO_clonotype1667	1	TRB:CASSGPGLGSYNYAEQFF;TRA:CAASGTQVVGQLTF;TRA:CAVPSNMGYKLTF
clone_876_seq_2	H11_PD1_KO_clonotype1668	1	TRB:CTCSPGLGENTLYF;TRA:CAVSMKSNNRIFF
clone_877_seq_2	H11_PD1_KO_clonotype1669	1	TRB:CTCSADRSQNTLYF;TRA:CAVRRSGYNKLTF
clone_878_seq_2	H11_PD1_KO_clonotype1670	1	TRB:CTCSADRANTEVFF;TRA:CAGSSGSWQLIF
clone_879_seq_2	H11_PD1_KO_clonotype1671	1	TRB:CTCSADRGHAEQFF;TRA:CAVSANYAQGLTF
clone_880_seq_2	H11_PD1_KO_clonotype1672	1	TRB:CTCSGDRANTEVFF;TRA:CAVSSGSWQLIF
clone_881_seq_2	H11_PD1_KO_clonotype1673	1	TRB:CASSPDRNSDYTF;TRA:CAARNYAQGLTF
clone_882_seq_2	H11_PD1_KO_clonotype1674	1	TRB:CASSRPGQDTQYF;TRA:CAASRGGNTGKLIF
clone_883_seq_2	H11_PD1_KO_clonotype1676	1	TRB:CASSGWGGSSYEQYF;TRA:CVLGRGTGNYKYVF
clone_884_seq_2	H11_PD1_KO_clonotype1677	1	TRB:CASSLDWGDKRTLYF;TRA:CALTRDSGYNKLTF;TRA:CAMREGNYNQGKLIF
clone_885_seq_2	H11_PD1_KO_clonotype1678	1	TRB:CASSPGGAGDERLFF;TRA:CALSMAYNQGKLIF;TRA:CVLFDSGYNKLTF
clone_886_seq_2	H11_PD1_KO_clonotype1679	1	TRB:CASSLTEHSQNTLYF;TRA:CAVRASGGNYKPTF
clone_887_seq_2	H11_PD1_KO_clonotype1680	1	TRB:CASSLDWQVSYEQYF;TRA:CAVSDSNYQLIW
clone_888_seq_2	H11_PD1_KO_clonotype1681	1	TRB:CASSPGLGGTGQLYF;TRA:CAASGSNYQLIW
clone_889_seq_2	H11_PD1_KO_clonotype1682	1	TRB:CASSLKGSYNSPLYF;TRA:CALRASSGSWQLIF
clone_890_seq_2	H11_PD1_KO_clonotype1683	1	TRB:CASRDWGGAYAEQFF;TRA:CAARGGGYKVVF
clone_891_seq_2	H11_PD1_KO_clonotype1684	1	TRB:CASSLRGGSYAEQFF;TRA:CALTLNTGNYKYVF;TRA:CAVSLRNNNNAPRF
clone_892_seq_2	H11_PD1_KO_clonotype1685	1	TRB:CASSLGGANYAEQFF;TRA:CAMPPNSAGNKLTF;TRA:CAVTRESNYNVLYF
clone_893_seq_2	H11_PD1_KO_clonotype1686	1	TRB:CASGGRGGSSSAETLYF;TRB:CASSPTGGAGQNTLYF;TRA:CAVSADYSNNRLTL
clone_894_seq_2	H11_PD1_KO_clonotype1687	1	TRB:CASSQDRQLSGNTLYF;TRA:CALSAGNMGYKLTF
clone_895_seq_2	H11_PD1_KO_clonotype1688	1	TRB:CTCSAGDSYAEQFF;TRA:CAMEQNQGGRALIF;TRA:CAVSPYQGGRALIF
clone_896_seq_2	H11_PD1_KO_clonotype1689	1	TRB:CTCSGQTYNSPLYF;TRA:CALGDEGASGGNYKPTF;TRA:CATELLYSNNRLTL
clone_897_seq_2	H11_PD1_KO_clonotype169	1	TRB:CASSDANQAPLF;TRA:CAVSPSSGSWQLIF
clone_898_seq_2	H11_PD1_KO_clonotype1690	1	TRB:CTCSGGTGGYEQYF;TRA:CAVSPNYNQGKLIF
clone_899_seq_2	H11_PD1_KO_clonotype1691	1	TRB:CASSIRQGNTLYF;TRA:CVLNTGANTGKLTF
clone_900_seq_2	H11_PD1_KO_clonotype1693	1	TRB:CASSQDGGGRAQNTLYF;TRA:CAVSGANTGKLTF
clone_901_seq_2	H11_PD1_KO_clonotype1694	1	TRB:CASSQAWGGAVTGQLYF;TRA:CAVGAGSFNKLTF
clone_902_seq_2	H11_PD1_KO_clonotype1695	1	TRB:CASSSLRRSGNTLYF;TRA:CALWELVGYANKMIF;TRA:CAVSGTGANTGKLTF
clone_903_seq_2	H11_PD1_KO_clonotype1696	1	TRB:CASSLEGDSAETLYF;TRA:CALRGGGSFNKLTF
clone_904_seq_2	H11_PD1_KO_clonotype1697	1	TRB:CASSRNWGGAYAEQFF;TRA:CALTVYGNEKITF
clone_905_seq_2	H11_PD1_KO_clonotype1698	1	TRB:CASSPPGLGGENTLYF;TRB:CASSRLGVNTGQLYF;TRA:CAVKDYGSSGNKLIF
clone_906_seq_2	H11_PD1_KO_clonotype1699	1	TRB:CASSLAGGAPFEQYF;TRA:CALNNAGAKLTF
clone_907_seq_2	H11_PD1_KO_clonotype1700	1	TRB:CASSGTGGRDTEVFF;TRA:CAASSGSFNKLTF
clone_908_seq_2	H11_PD1_KO_clonotype1703	1	TRB:CASSQSSGTLYAEQFF;TRA:CAASERLDYANKMIF
clone_909_seq_2	H11_PD1_KO_clonotype1704	1	TRB:CASSSGTGGYAEQFF;TRB:CTCSADVANSDYTF;TRA:CAARDNYAQGLTF
clone_910_seq_2	H11_PD1_KO_clonotype1705	1	TRB:CTCSATGMDTEVFF;TRA:CAVSATGGYKVVF
clone_911_seq_2	H11_PD1_KO_clonotype1706	1	TRB:CTCSVGTANTEVFF;TRA:CAAGRNSNNRIFF
clone_912_seq_2	H11_PD1_KO_clonotype1707	1	TRB:CTCLGTGGAHTLYF;TRA:CALTGASSGSWQLIF
clone_913_seq_2	H11_PD1_KO_clonotype1708	1	TRB:CASRWGVQNTLYF;TRA:CALGDQTGGYKVVF
clone_914_seq_2	H11_PD1_KO_clonotype1709	1	TRB:CASSLWDLSGNTLYF;TRB:CASSQRVSYEQYF;TRA:CALKNNAGAKLTF;TRA:CALSELGSNNRIFF
clone_915_seq_2	H11_PD1_KO_clonotype1710	1	TRB:CASGGTGWDTQYF;TRB:CASTRDWGGAYEQYF;TRA:CALWELASNTNKVVF;TRA:CAVSEDNMGYKLTF
clone_916_seq_2	H11_PD1_KO_clonotype1711	1	TRB:CASSPRRGNYAEQFF;TRA:CAASANYNQGKLIF
clone_917_seq_2	H11_PD1_KO_clonotype1712	1	TRB:CASSRDPWGNQDTQYF;TRA:CAMGSGTGSKLSF
clone_918_seq_2	H11_PD1_KO_clonotype1713	1	TRB:CASSLDGTGGETLYF;TRA:CALVYQGGRALIF
clone_919_seq_2	H11_PD1_KO_clonotype1714	1	TRB:CASSLDRTSQNTLYF;TRA:CALGGNNAGAKLTF
clone_920_seq_2	H11_PD1_KO_clonotype1716	1	TRB:CASSQDPGGRGNTLYF;TRA:CALGAHYNVLYF;TRA:CALGANSGTYQRF
clone_921_seq_2	H11_PD1_KO_clonotype1717	1	TRB:CSSSLDWGGYAEQFF;TRA:CAPPDYSNNRLTL
clone_922_seq_2	H11_PD1_KO_clonotype1718	1	TRB:CTCSGRDRGNEQYF;TRA:CALSASVNTGNYKYVF
clone_923_seq_2	H11_PD1_KO_clonotype1719	1	TRB:CASKHRGNERLFF;TRA:CALAMSNYNVLYF
clone_924_seq_2	H11_PD1_KO_clonotype1720	1	TRB:CASSFRTLSSAETLYF;TRA:CVVGDRGSALGRLHF
clone_925_seq_2	H11_PD1_KO_clonotype1721	1	TRB:CASSPTGSNTGQLYF;TRA:CAVSLLTGSGGKLTL
clone_926_seq_2	H11_PD1_KO_clonotype1722	1	TRB:CASSSEGGAVAEQFF;TRA:CALSEGYSNNRLTL
clone_927_seq_2	H11_PD1_KO_clonotype1723	1	TRB:CASSLNPDSNERLFF;TRA:CAMREGRGYKVVF
clone_928_seq_2	H11_PD1_KO_clonotype1724	1	TRB:CASSLDRGNNSPLYF;TRA:CALSDRGSGTYQRF
clone_929_seq_2	H11_PD1_KO_clonotype1725	1	TRB:CASSPHWGIQNTLYF;TRA:CALSGGNMGYKLTF
clone_930_seq_2	H11_PD1_KO_clonotype1726	1	TRB:CASSRDWGGQNTLYF;TRA:CALSFYQGGRALIF
clone_931_seq_2	H11_PD1_KO_clonotype1727	1	TRB:CSSSQSGQGGERLFF;TRA:CAASMLSGSFNKLTF
clone_932_seq_2	H11_PD1_KO_clonotype1728	1	TRB:CTCSADPSGNTLYF;TRA:CAVSPQTGFASALTF
clone_933_seq_2	H11_PD1_KO_clonotype1729	1	TRB:CTCSVRGDNQAPLF;TRA:CAVSYTGGLSGKLTF
clone_934_seq_2	H11_PD1_KO_clonotype1730	1	TRB:CASSLYARGLAETLYF;TRA:CALSEPGTGSNRLTF
clone_935_seq_2	H11_PD1_KO_clonotype1731	1	TRB:CASSQDGWGGNYAEQFF;TRA:CALGHNTNTGKLTF
clone_936_seq_2	H11_PD1_KO_clonotype1732	1	TRB:CASSIPGISAETLYF;TRA:CALGYNTNTGKLTF
clone_937_seq_2	H11_PD1_KO_clonotype1733	1	TRB:CASSLDRGPNERLFF;TRA:CAMREASSGSWQLIF
clone_938_seq_2	H11_PD1_KO_clonotype1734	1	TRB:CASSLGLGDYAEQFF;TRA:CALGDMSNYNVLYF
clone_939_seq_2	H11_PD1_KO_clonotype1735	1	TRB:CASSLAPGSSYEQYF;TRA:CAMREGRPNTGKLTF
clone_940_seq_2	H11_PD1_KO_clonotype1736	1	TRB:CASSQDPAGSNTEVFF;TRA:CALSDRGGSGGKLTL
clone_941_seq_2	H11_PD1_KO_clonotype1737	1	TRB:CASSTDRNTEVFF;TRA:CALWGFRNNYAQGLTF
clone_942_seq_2	H11_PD1_KO_clonotype1738	1	TRB:CASSPGTGGAGDTQYF;TRA:CAMREDITGNTGKLIF
clone_943_seq_2	H11_PD1_KO_clonotype1739	1	TRB:CASTPGLNQAPLF;TRA:CAAAPGGNNKLTF
clone_944_seq_2	H11_PD1_KO_clonotype1740	1	TRB:CASSLRLGGQDTQYF;TRA:CAMREDSGGSNAKLTF
clone_945_seq_2	H11_PD1_KO_clonotype1741	1	TRB:CASSLWGTPDTEVFF;TRA:CAAGANNNNAPRF
clone_946_seq_2	H11_PD1_KO_clonotype1742	1	TRB:CTCSAGNNNQAPLF;TRA:CAARNSNNRIFF
clone_947_seq_2	H11_PD1_KO_clonotype1743	1	TRB:CASSPDWGGPNQDTQYF;TRA:CAASVGGNNKLTF
clone_948_seq_2	H11_PD1_KO_clonotype1744	1	TRB:CASSLRWANYAEQFF;TRA:CAASWSGGYKVVF
clone_949_seq_2	H11_PD1_KO_clonotype1745	1	TRB:CASSLGQGGNERLFF;TRA:CAARANSGTYQRF
clone_950_seq_2	H11_PD1_KO_clonotype1746	1	TRB:CASSFGLTSAETLYF;TRA:CAARQGGRALIF
clone_951_seq_2	H11_PD1_KO_clonotype1747	1	TRB:CASSLSGLGGYEQYF;TRA:CAANTGGNNKLTF
clone_952_seq_2	H11_PD1_KO_clonotype1748	1	TRB:CTCSETGPNTEVFF;TRA:CAASGYSGTYQRF
clone_953_seq_2	H11_PD1_KO_clonotype1749	1	TRB:CTCSGDRDSYEQYF;TRA:CAARGTNTGKLTF
clone_954_seq_2	H11_PD1_KO_clonotype1750	1	TRB:CTCSGTFNQDTQYF;TRA:CAAHTGGYKVVF
clone_955_seq_2	H11_PD1_KO_clonotype1751	1	TRB:CASSMGNTGQLYF;TRA:CAANNNAGAKLTF
clone_956_seq_2	H11_PD1_KO_clonotype1752	1	TRB:CASSLVGGGNERLFF;TRA:CAARDNYAQGLTF
clone_957_seq_2	H11_PD1_KO_clonotype1754	1	TRB:CASSTDRGANERLFF;TRA:CAASAGNNNAPRF
clone_958_seq_2	H11_PD1_KO_clonotype1755	1	TRB:CASSPDWGAQDTQYF;TRA:CAASASGSWQLIF
clone_959_seq_2	H11_PD1_KO_clonotype1756	1	TRB:CASSSDWGGTAETLYF;TRA:CAASNRGSALGRLHF
clone_960_seq_2	H11_PD1_KO_clonotype1757	1	TRB:CTCSHRGINQAPLF;TRA:CALSENYGNEKITF
clone_961_seq_2	H11_PD1_KO_clonotype1758	1	TRB:CASSLGGGNTGQLYF;TRA:CALWELAVGPGTGSNRLTF
clone_962_seq_2	H11_PD1_KO_clonotype1759	1	TRB:CASSRGANTGQLYF
clone_963_seq_2	H11_PD1_KO_clonotype1760	1	TRB:CASRTGGAGTEVFF
clone_964_seq_2	H11_PD1_KO_clonotype1761	1	TRB:CASSIIQKNTEVFF
clone_965_seq_2	H11_PD1_KO_clonotype1762	1	TRB:CASSIEGGQNTLYF
clone_966_seq_2	H11_PD1_KO_clonotype1763	1	TRB:CASSIGGGSYEQYF
clone_967_seq_2	H11_PD1_KO_clonotype1764	1	TRB:CASSMWGAQNTLYF
clone_968_seq_2	H11_PD1_KO_clonotype1765	1	TRB:CASSPGQGKDTQYF
clone_969_seq_2	H11_PD1_KO_clonotype1766	1	TRB:CASSRDWGGYEQYF
clone_970_seq_2	H11_PD1_KO_clonotype1768	1	TRA:CAAQDRGSALGRLHF
clone_971_seq_2	H11_PD1_KO_clonotype1770	1	TRA:CALVGTASLGKLQF
clone_972_seq_2	H11_PD1_KO_clonotype1771	1	TRB:CASSLSDREGNNQAPLF
clone_973_seq_2	H11_PD1_KO_clonotype1772	1	TRA:CALSVGTGGYKVVF
clone_974_seq_2	H11_PD1_KO_clonotype1773	1	TRB:CASSPDWGSSAETLYF
clone_975_seq_2	H11_PD1_KO_clonotype1774	1	TRB:CASSDRDWASAETLYF
clone_976_seq_2	H11_PD1_KO_clonotype1775	1	TRB:CASSLTWGSNTGQLYF
clone_977_seq_2	H11_PD1_KO_clonotype1776	1	TRB:CASSQLGGRGQNTLYF
clone_978_seq_2	H11_PD1_KO_clonotype1777	1	TRB:CASSRDGWGGRAETLYF
clone_979_seq_2	H11_PD1_KO_clonotype1778	1	TRB:CASSGQGGRGAETLYF
clone_980_seq_2	H11_PD1_KO_clonotype1779	1	TRB:CASSWDRGRGNTEVFF
clone_981_seq_2	H11_PD1_KO_clonotype1780	1	TRB:CASSHPGLGNYAEQFF
clone_982_seq_2	H11_PD1_KO_clonotype1781	1	TRB:CASSFFWGGRQNTLYF
clone_983_seq_2	H11_PD1_KO_clonotype1782	1	TRB:CASSARDRISNERLFF
clone_984_seq_2	H11_PD1_KO_clonotype1783	1	TRB:CASSQETGWVSAETLYF
clone_985_seq_2	H11_PD1_KO_clonotype1784	1	TRA:CALGDANTNKVVF
clone_986_seq_2	H11_PD1_KO_clonotype1785	1	TRB:CTCSTTGGAHAEQFF
clone_987_seq_2	H11_PD1_KO_clonotype1786	1	TRB:CTCSADWGRQNTLYF
clone_988_seq_2	H11_PD1_KO_clonotype1787	1	TRB:CTCSAEGQGKNTLYF
clone_989_seq_2	H11_PD1_KO_clonotype1788	1	TRB:CTCSAEGQGKNTLYF
clone_990_seq_2	H11_PD1_KO_clonotype1789	1	TRB:CTCSAEGQGKNTLYF
clone_991_seq_2	H11_PD1_KO_clonotype1790	1	TRB:CTCSADRAGSYEQYF
clone_992_seq_2	H11_PD1_KO_clonotype1791	1	TRB:CTCSADRGGGDEQYF
clone_993_seq_2	H11_PD1_KO_clonotype1792	1	TRB:CTCSADGNANTEVFF
clone_994_seq_2	H11_PD1_KO_clonotype1793	1	TRB:CTCSADGNANTEVFF
clone_995_seq_2	H11_PD1_KO_clonotype1794	1	TRB:CTCSAGPYNNQAPLF
clone_996_seq_2	H11_PD1_KO_clonotype1795	1	TRB:CTCSAVGAGQNTLYF
clone_997_seq_2	H11_PD1_KO_clonotype1796	1	TRB:CTCSARGRSNSDYTF
clone_998_seq_2	H11_PD1_KO_clonotype1797	1	TRB:CTCSAGLGGSYEQYF
clone_999_seq_2	H11_PD1_KO_clonotype1800	1	TRB:CASSIPGTNERLFF;TRA:CAANYNVLYF
clone_1000_seq_2	H11_PD1_KO_clonotype1801	1	TRB:CASSILGGRDTQYF;TRA:CGGGSNAKLTF
clone_1001_seq_2	H11_PD1_KO_clonotype1802	1	TRB:CASSQDGWGGSAETLYF;TRA:CAADNNNNAPRF
clone_1002_seq_2	H11_PD1_KO_clonotype1803	1	TRB:CTCSADGNANTEVFF;TRA:CAVSDNQGKLIF
clone_1003_seq_2	H11_PD1_KO_clonotype1804	1	TRB:CASRLGSNQDTQYF;TRA:CAASKEANYNVLYF;TRA:CALHNTNTGKLTF
clone_1004_seq_2	H11_PD1_KO_clonotype1805	1	TRB:CASRDRISNERLFF;TRA:CAIETSNTNKVVF
clone_1005_seq_2	H11_PD1_KO_clonotype1806	1	TRB:CASSIRGADTEVFF;TRA:CAAEADAGAKLTF
clone_1006_seq_2	H11_PD1_KO_clonotype1807	1	TRB:CASSIWGGQDTQYF;TRA:CALDSNNRIFF;TRA:CVLSAGYGSSGNKLIF
clone_1007_seq_2	H11_PD1_KO_clonotype1808	1	TRB:CASSSGLGGLQNTLYF;TRA:CARGKLIF
clone_1008_seq_2	H11_PD1_KO_clonotype1809	1	TRB:CASSLAGGRPQDTQYF;TRA:CAPSGTGGYKVVF
clone_1009_seq_2	H11_PD1_KO_clonotype181	1	TRB:CASSRDYAEQFF;TRA:CAVSGAGNTGKLIF
clone_1010_seq_2	H11_PD1_KO_clonotype1810	1	TRB:CASSFRDRGRDAEQFF;TRA:CIVTDVGYSNNRLTL
clone_1011_seq_2	H11_PD1_KO_clonotype1811	1	TRB:CTCSAGLGGQDTQYF;TRA:CAAETPGGYKVVF
clone_1012_seq_2	H11_PD1_KO_clonotype1812	1	TRB:CASSITISNERLFF;TRA:CAISSGGSNAKLTF
clone_1013_seq_2	H11_PD1_KO_clonotype1813	1	TRB:CASSRTASNSDYTF;TRA:CAVSGGGRALIF
clone_1014_seq_2	H11_PD1_KO_clonotype1814	1	TRB:CASGPGTENSDYTF;TRB:CASSLMGQGAGNTLYF;TRA:CAASAADTNAYKVIF;TRA:CASNNAGAKLTF
clone_1015_seq_2	H11_PD1_KO_clonotype1815	1	TRB:CASSLDWGGRRDTQYF;TRA:CALSDGTNKVVF
clone_1016_seq_2	H11_PD1_KO_clonotype1816	1	TRB:CASSFFWGGRQNTLYF;TRB:CASSPGQGAGNTLYF;TRA:CALERGTNTGKLTF;TRA:CAMSMSNYNVLYF
clone_1017_seq_2	H11_PD1_KO_clonotype1817	1	TRB:CTCSPSQGGYGEQYF;TRA:CAMEPNTNKVVF
clone_1018_seq_2	H11_PD1_KO_clonotype1818	1	TRB:CASSIRGGNTEVFF;TRA:CALTSGGNYKPTF
clone_1019_seq_2	H11_PD1_KO_clonotype1819	1	TRB:CASSIDSSQNTLYF;TRA:CAVSIYSNNRLTL
clone_1020_seq_2	H11_PD1_KO_clonotype182	1	TRB:CASSLDRDTEVFF;TRA:CAASTGGYKVVF
clone_1021_seq_2	H11_PD1_KO_clonotype1821	1	TRB:CASSSSGQGPSAETLYF;TRA:CAALNTGNYKYVF
clone_1022_seq_2	H11_PD1_KO_clonotype1822	1	TRB:CASSLVQGYNYAEQFF;TRA:CAAGSFNKLTF
clone_1023_seq_2	H11_PD1_KO_clonotype1823	1	TRB:CTCSAGTGGAETLYF;TRA:CAASTTNAYKVIF
clone_1024_seq_2	H11_PD1_KO_clonotype1824	1	TRB:CTCSAWTGGQDTQYF;TRA:CALSQSNYNVLYF
clone_1025_seq_2	H11_PD1_KO_clonotype1825	1	TRB:CASSPGGSQNTLYF;TRA:CAASLGYNVLYF
clone_1026_seq_2	H11_PD1_KO_clonotype1826	1	TRB:CASSGTANTGQLYF;TRA:CAVSASGNYKYVF
clone_1027_seq_2	H11_PD1_KO_clonotype1827	1	TRB:CASSLLGPNNQDTQYF;TRA:CAVPPGYQNFYF
clone_1028_seq_2	H11_PD1_KO_clonotype1828	1	TRB:CASSLVGGGGQNTLYF;TRA:CALRTNAYKVIF
clone_1029_seq_2	H11_PD1_KO_clonotype1829	1	TRB:CASSIGTGEDSPLYF;TRB:CASSSLQGANTGQLYF;TRA:CATDDASSGQKLVF
clone_1030_seq_2	H11_PD1_KO_clonotype183	1	TRB:CASSYRGEDTQYF;TRA:CAATDYNQGKLIF
clone_1031_seq_2	H11_PD1_KO_clonotype1830	1	TRB:CASSLTGQGRGNTLYF;TRA:CAPNSGTYQRF
clone_1032_seq_2	H11_PD1_KO_clonotype1831	1	TRB:CTCSSWGASQNTLYF;TRA:CALSGTGGNNKLTF
clone_1033_seq_2	H11_PD1_KO_clonotype1832	1	TRB:CTCSADGGRNTEVFF;TRA:CALRSGGSNAKLTF
clone_1034_seq_2	H11_PD1_KO_clonotype1833	1	TRB:CTCSADYTGAYEQYF;TRA:CAVSGSNNRIFF
clone_1035_seq_2	H11_PD1_KO_clonotype1834	1	TRB:CTCSAGDRSYAEQFF;TRA:CAVSMGGGRALIF
clone_1036_seq_2	H11_PD1_KO_clonotype1835	1	TRB:CASTRDGSNERLFF;TRA:CAVRGQGGRALIF
clone_1037_seq_2	H11_PD1_KO_clonotype1836	1	TRB:CASSIAGGNTEVFF;TRA:CAVSAQNTNTGKLTF;TRA:CAVSMRAGFASALTF
clone_1038_seq_2	H11_PD1_KO_clonotype1837	1	TRB:CASSIGVANTEVFF;TRA:CALSSNYNVLYF
clone_1039_seq_2	H11_PD1_KO_clonotype1838	1	TRB:CASSLDWGGGSYEQYF;TRA:CALSDNNNAPRF
clone_1040_seq_2	H11_PD1_KO_clonotype1839	1	TRB:CASSLGQGTSAETLYF;TRA:CALGDPGYQNFYF;TRA:CALWEPNSGGSNAKLTF
clone_1041_seq_2	H11_PD1_KO_clonotype1840	1	TRB:CASSRTGGATQDTQYF;TRA:CAVRTTSGGNYKPTF
clone_1042_seq_2	H11_PD1_KO_clonotype1841	1	TRB:CASSLNRGGSNSDYTF;TRA:CAASKSNYNVLYF
clone_1043_seq_2	H11_PD1_KO_clonotype1842	1	TRB:CASSSRWGASAETLYF;TRA:CAVPHRGSALGRLHF
clone_1044_seq_2	H11_PD1_KO_clonotype1843	1	TRB:CASSSRLGANYAEQFF;TRA:CALSDSGSWQLIF
clone_1045_seq_2	H11_PD1_KO_clonotype1844	1	TRB:CASSQEGWGANQDTQYF;TRA:CALSDVGSSGNKLIF
clone_1046_seq_2	H11_PD1_KO_clonotype1845	1	TRB:CTCSTTGGAHAEQFF;TRA:CAVRSSGGNYKPTF
clone_1047_seq_2	H11_PD1_KO_clonotype1847	1	TRB:CTCSAEQGSQNTLYF;TRA:CAVPDYNQGKLIF
clone_1048_seq_2	H11_PD1_KO_clonotype1848	1	TRB:CASRDWGGAETLYF;TRA:CAASEQGGSSGNKLIF
clone_1049_seq_2	H11_PD1_KO_clonotype1849	1	TRB:CASSPGTTNTEVFF;TRA:CAAPSMSNYNVLYF
clone_1050_seq_2	H11_PD1_KO_clonotype1850	1	TRB:CASSMQGSGNTLYF;TRA:CAVSAPSSSFSKLVF
clone_1051_seq_2	H11_PD1_KO_clonotype1851	1	TRB:CASSMPGGQDTQYF;TRA:CAASESQGGRALIF;TRA:CALGDQTGGYKVVF
clone_1052_seq_2	H11_PD1_KO_clonotype1852	1	TRB:CASSIRTNYAEQFF;TRA:CALSRNAGAKLTF
clone_1053_seq_2	H11_PD1_KO_clonotype1853	1	TRB:CASSPGTGGSDYTF;TRA:CSASPDYSNNRLTL
clone_1054_seq_2	H11_PD1_KO_clonotype1854	1	TRB:CASSPRTGPSAETLYF;TRA:CALGDHGSGGKLTL
clone_1055_seq_2	H11_PD1_KO_clonotype1855	1	TRB:CTCRPGQGAGAEQFF;TRA:CAARTSGGNYKPTF
clone_1056_seq_2	H11_PD1_KO_clonotype1856	1	TRB:CTCSAWQVLNERLFF;TRA:CALGGNNNAPRF
clone_1057_seq_2	H11_PD1_KO_clonotype1857	1	TRB:CASSTGGGSYEQYF;TRA:CAVSSTTASLGKLQF
clone_1058_seq_2	H11_PD1_KO_clonotype1858	1	TRB:CASSIGARIYEQYF;TRA:CALGDSSSGSWQLIF
clone_1059_seq_2	H11_PD1_KO_clonotype1859	1	TRB:CASSIGGVNSDYTF;TRA:CALSPQGTGSKLSF
clone_1060_seq_2	H11_PD1_KO_clonotype1860	1	TRB:CASSIGLYNSPLYF;TRA:CAASAWRGTGSKLSF
clone_1061_seq_2	H11_PD1_KO_clonotype1861	1	TRB:CASSRRPPGLGSYEQYF;TRA:CAPMTNSAGNKLTF
clone_1062_seq_2	H11_PD1_KO_clonotype1862	1	TRB:CTCSAAQGRGERLFF;TRA:CALGRNSGTYQRF
clone_1063_seq_2	H11_PD1_KO_clonotype1864	1	TRB:CASSPPRDISGNTLYF;TRA:CALSDRMDSNYQLIW
clone_1064_seq_2	H11_PD1_KO_clonotype1865	1	TRB:CASSPVGQRNYAEQFF;TRA:CAMREGTGGNNKLTF
clone_1065_seq_2	H11_PD1_KO_clonotype1866	1	TRB:CASSSDWGENTGQLYF;TRA:CALSARWYNQGKLIF
clone_1066_seq_2	H11_PD1_KO_clonotype1867	1	TRB:CTCSVFRDWGYEQYF;TRA:CALSDDGGSNYKLTF
clone_1067_seq_2	H11_PD1_KO_clonotype1868	1	TRB:CASSLEWTGGADTQYF;TRA:CAMREGGYNQGKLIF
clone_1068_seq_2	H11_PD1_KO_clonotype1869	1	TRB:CASSLSGGARTETLYF;TRA:CAMREGGTNAYKVIF
clone_1069_seq_2	H11_PD1_KO_clonotype1870	1	TRB:CSSSPGTGGRGTEVFF;TRA:CALSDPPGTGSNRLTF
clone_1070_seq_2	H11_PD1_KO_clonotype1871	1	TRB:CASSIGTGGEEQYF;TRA:CAARGYGSSGNKLIF;TRA:CAASDNYAQGLTF
clone_1071_seq_2	H11_PD1_KO_clonotype1872	1	TRB:CASSLWGQGYNSPLYF;TRA:CALGLMNYGSSGNKLIF
clone_1072_seq_2	H11_PD1_KO_clonotype1873	1	TRB:CASSTGVDTGQLYF;TRA:CAARVSSGSWQLIF
clone_1073_seq_2	H11_PD1_KO_clonotype1874	1	TRB:CASSLVWGDSQNTLYF;TRA:CAAGAGSGNTGKLIF
clone_1074_seq_2	H11_PD1_KO_clonotype1875	1	TRB:CASSFWGGAGAETLYF;TRA:CAASENYNQGKLIF
clone_1075_seq_2	H11_PD1_KO_clonotype1877	1	TRB:CTCSAAPTGGYEQYF;TRA:CAASADYSNNRLTL
clone_1076_seq_2	H11_PD1_KO_clonotype1878	1	TRB:CASSQGDWGGAGAETLYF;TRA:CAASAYSGGSNAKLTF
clone_1077_seq_2	H11_PD1_KO_clonotype1879	1	TRB:CASSKTGGFQDTQYF
clone_1078_seq_2	H11_PD1_KO_clonotype1880	1	TRB:CASSMGQLNQDTQYF
clone_1079_seq_2	H11_PD1_KO_clonotype1881	1	TRB:CASRPGQGYAETLYF
clone_1080_seq_2	H11_PD1_KO_clonotype1882	1	TRB:CASSRWGGRAETLYF
clone_1081_seq_2	H11_PD1_KO_clonotype1885	1	TRB:CASSPTGVPQNTLYF
clone_1082_seq_2	H11_PD1_KO_clonotype1886	1	TRA:CAASMNYGSSGNKLIF
clone_1083_seq_2	H11_PD1_KO_clonotype1887	1	TRA:CALSGITGNTGKLIF
clone_1084_seq_2	H11_PD1_KO_clonotype1888	1	TRA:CAMREGESNNRIFF
clone_1085_seq_2	H11_PD1_KO_clonotype1889	1	TRA:CAMRGGYNQGKLIF
clone_1086_seq_2	H11_PD1_KO_clonotype1890	1	TRA:CAMRGGYNQGKLIF
clone_1087_seq_2	H11_PD1_KO_clonotype1891	1	TRB:CASSSRDWGGPYAEQFF
clone_1088_seq_2	H11_PD1_KO_clonotype1892	1	TRB:CASSPRLGGCNQDTQYF
clone_1089_seq_2	H11_PD1_KO_clonotype1893	1	TRB:CASSPRTGGTSAETLYF
clone_1090_seq_2	H11_PD1_KO_clonotype1894	1	TRB:CASGNNYAEQFF
clone_1091_seq_2	H11_PD1_KO_clonotype1895	1	TRB:CASSLPGLGGPSAETLYF
clone_1092_seq_2	H11_PD1_KO_clonotype1896	1	TRA:CALGPSGGNYKPTF
clone_1093_seq_2	H11_PD1_KO_clonotype1897	1	TRB:CTCSADWGLDAETLYF
clone_1094_seq_2	H11_PD1_KO_clonotype1899	1	TRB:CASRPGQGYAETLYF;TRA:CAVRGYQNFYL
clone_1095_seq_2	H11_PD1_KO_clonotype190	1	TRB:CASGETANSPLYF;TRA:CAMDTNTGKLTF
clone_1096_seq_2	H11_PD1_KO_clonotype1900	1	TRB:CASRPGQGYAETLYF;TRA:CAVRGYQNFYF
clone_1097_seq_2	H11_PD1_KO_clonotype1901	1	TRB:CASSGQGKAGNTLYF;TRA:CAITNAYKVIF
clone_1098_seq_2	H11_PD1_KO_clonotype1902	1	TRB:CTCSADRGGPTGQLYF;TRA:CAGASSGSWQLIF
clone_1099_seq_2	H11_PD1_KO_clonotype1903	1	TRB:CTCSADSGPPAETLYF;TRA:CAASEGNYAQGLTF;TRA:CAPPPSNTNKVVF
clone_1100_seq_2	H11_PD1_KO_clonotype1904	1	TRB:CASSIGGSYNSPLYF;TRA:CALSDSNNRIFF
clone_1101_seq_2	H11_PD1_KO_clonotype1905	1	TRB:CASSAWGAGQDTQYF;TRA:CIVTDRANSAGNKLTF
clone_1102_seq_2	H11_PD1_KO_clonotype1906	1	TRB:CASSGQISYNSPLYF;TRA:CAVSKGGRALIF
clone_1103_seq_2	H11_PD1_KO_clonotype1907	1	TRB:CTCSEDWGGNYAEQFF;TRA:CAGTGNTGKLIF
clone_1104_seq_2	H11_PD1_KO_clonotype1909	1	TRB:CASSRDGGAEAEQFF;TRA:CVLGLYNQGKLIF
clone_1105_seq_2	H11_PD1_KO_clonotype1910	1	TRB:CASSPTGGSQNTLYF;TRA:CASTGNYKYVF
clone_1106_seq_2	H11_PD1_KO_clonotype1911	1	TRB:CASSFGTGGGVAETLYF;TRA:CILRVGRNQGGSAKLIF
clone_1107_seq_2	H11_PD1_KO_clonotype1912	1	TRB:CTCSAGLGGRYAEQFF;TRA:CAVSGSSGQKLVF
clone_1108_seq_2	H11_PD1_KO_clonotype1913	1	TRB:CASSSRTGGINYAEQFF;TRA:CALKSNYQLIW
clone_1109_seq_2	H11_PD1_KO_clonotype1914	1	TRB:CTCSADWGRGNQAPLF;TRA:CAVRNYNQGKLIF
clone_1110_seq_2	H11_PD1_KO_clonotype1915	1	TRB:CTCSVPGTGVQDTQYF;TRA:CAVSATEGADRLTF
clone_1111_seq_2	H11_PD1_KO_clonotype1916	1	TRB:CASSIQGASGNTLYF;TRA:CAASANSGTYQRF
clone_1112_seq_2	H11_PD1_KO_clonotype1917	1	TRB:CASSIGQGAGERLFF;TRA:CAASKTGGLSGKLTF
clone_1113_seq_2	H11_PD1_KO_clonotype1918	1	TRB:CTCSADRGISAETLYF;TRA:CAATGTGGYKVVF
clone_1114_seq_2	H11_PD1_KO_clonotype1919	1	TRB:CASSRDRGGQNTLYF;TRA:CALDGSSGNKLIF;TRA:CALSGLSNYQLIW
clone_1115_seq_2	H11_PD1_KO_clonotype1920	1	TRB:CASSITGGSYAEQFF;TRA:CVLSAGAGNTGKLIF
clone_1116_seq_2	H11_PD1_KO_clonotype1921	1	TRB:CASSRDWGTDAEQFF;TRA:CALAKNTGYQNFYF
clone_1117_seq_2	H11_PD1_KO_clonotype1922	1	TRB:CASSIGGGRYAEQFF;TRA:CAMRENNAGAKLTF
clone_1118_seq_2	H11_PD1_KO_clonotype1923	1	TRB:CASSRQGLSNERLFF;TRA:CALRPRGSALGRLHF
clone_1119_seq_2	H11_PD1_KO_clonotype1924	1	TRB:CASSQTGYNYAEQFF;TRA:CALSENYGSSGNKLIF
clone_1120_seq_2	H11_PD1_KO_clonotype1925	1	TRB:CASSSPPGQGSQNTLYF;TRA:CAASYQGGRALIF
clone_1121_seq_2	H11_PD1_KO_clonotype1926	1	TRA:CAASEGGRGSALGRLHF
clone_1122_seq_2	H11_PD1_KO_clonotype1927	1	TRB:CASSITAGKNTGQLYF
clone_1123_seq_2	H11_PD1_KO_clonotype1928	1	TRB:CASSIGLGGHTGQLYF
clone_1124_seq_2	H11_PD1_KO_clonotype1929	1	TRB:CASSLDRTGAANTGQLYF
clone_1125_seq_2	H11_PD1_KO_clonotype1930	1	TRB:CTCSAARTGGGQNTLYF
clone_1126_seq_2	H11_PD1_KO_clonotype1931	1	TRB:CASSIGTGGISYEQYF;TRA:CAAGGSNAKLTF
clone_1127_seq_2	H11_PD1_KO_clonotype1932	1	TRB:CASRKGLGNNYAEQFF;TRA:CAVGPDSNYQLIW
clone_1128_seq_2	H11_PD1_KO_clonotype1933	1	TRB:CASSIEAGGSQNTLYF;TRA:CAVKEGSALGRLHF
clone_1129_seq_2	H11_PD1_KO_clonotype1934	1	TRB:CASSPGLGGVSYEQYF;TRA:CAVSNMGYKLTF
clone_1130_seq_2	H11_PD1_KO_clonotype1935	1	TRB:CASSPRTGTYNSPLYF;TRA:CAVSMTNSAGNKLTF
clone_1131_seq_2	H11_PD1_KO_clonotype1936	1	TRB:CASSIDWGGGGGQNTLYF;TRA:CAMEPDSSGSWQLIF
clone_1132_seq_2	H11_PD1_KO_clonotype1938	1	TRB:CTCSADPGGAGQDTQYF;TRA:CALGEGDSNYQLIW
clone_1133_seq_2	H11_PD1_KO_clonotype1939	1	TRB:CTCSARDRGANTGQLYF;TRA:CAATLNTGYQNFYF
clone_1134_seq_2	H11_PD1_KO_clonotype1940	1	TRB:CASGEPRVL;TRA:CAASEHARNNYAQGLTF
clone_1135_seq_2	H11_PD1_KO_clonotype1941	1	TRB:CASSQEGQGEFYNYAEQFF;TRA:CAMREGDTNAYKVIF
clone_1136_seq_2	H11_PD1_KO_clonotype1942	1	TRB:CASSQEGQGEFYNYAEQFF;TRA:CAMREGDTNAYKVIF
clone_1137_seq_2	H11_PD1_KO_clonotype1943	1	TRB:CTCSGGLGGRLSYEQYF;TRA:CAMREGQGSNNRLTL
clone_1138_seq_2	H11_PD1_KO_clonotype1944	1	TRB:CASSIRLGLGAETLYF;TRA:CAASASSGSWQLIF
clone_1139_seq_2	H11_PD1_KO_clonotype1946	1	TRA:CAATRNNNNAPRF
clone_1140_seq_2	H11_PD1_KO_clonotype1947	1	TRB:CASGGYEQYF
clone_1141_seq_2	H11_PD1_KO_clonotype1948	1	TRB:CASGDPGGDTEVFF;TRA:CALERNAGAKLTF
clone_1142_seq_2	H11_PD1_KO_clonotype1949	1	TRB:CASGGQGPNERLFF;TRA:CAADSGGSNAKLTF
clone_1143_seq_2	H11_PD1_KO_clonotype195	1	TRB:CASSDALLGGREQYF;TRB:CASSPGTGHTEVFF;TRA:CAARKYQGGSAKLIF
clone_1144_seq_2	H11_PD1_KO_clonotype1950	1	TRB:CASSIAPGSISNERLFF;TRA:CAMEPGGYKVVF;TRA:CATGSSGSWQLIF
clone_1145_seq_2	H11_PD1_KO_clonotype1951	1	TRB:CASGDPEQYF;TRA:CAVSAGDYANKMIF
clone_1146_seq_2	H11_PD1_KO_clonotype1952	1	TRB:CASSLSEQYF;TRA:CAVSPTASLGKLQF
clone_1147_seq_2	H11_PD1_KO_clonotype1953	1	TRB:CASSVRDRVPSQNTLYF;TRA:CALGDSGGSNAKLTF
clone_1148_seq_2	H11_PD1_KO_clonotype1954	1	TRB:CASGDGEQYF;TRA:CVVGDRGSALGRLHF
clone_1149_seq_2	H11_PD1_KO_clonotype1955	1	TRA:CAASANNNNAPRF
clone_1150_seq_2	H11_PD1_KO_clonotype1956	1	TRA:CAASANNNNAPRF
clone_1151_seq_2	H11_PD1_KO_clonotype1957	1	TRA:CAASANNNNAPRF
clone_1152_seq_2	H11_PD1_KO_clonotype1958	1	TRA:CAAKGSNNRIFF
clone_1153_seq_2	H11_PD1_KO_clonotype1959	1	TRB:CASGDRGLNTGQLYF
clone_1154_seq_2	H11_PD1_KO_clonotype196	1	TRB:CGARDHGTANSDYTF;TRA:CALKYSGTYQRF
clone_1155_seq_2	H11_PD1_KO_clonotype1960	1	TRB:CASGEWDEQYF;TRA:CAAEANSGTYQRF
clone_1156_seq_2	H11_PD1_KO_clonotype1961	1	TRB:CASGDAREQYF;TRA:CATDIDTNAYKVIF
clone_1157_seq_2	H11_PD1_KO_clonotype1962	1	TRB:CASGENERLFF;TRA:CAASKDNQGKLIF
clone_1158_seq_2	H11_PD1_KO_clonotype1963	1	TRB:CASGDRAEQFF;TRA:CAALNTGANTGKLTF
clone_1159_seq_2	H11_PD1_KO_clonotype1964	1	TRA:CAGIASSSFSKLVF
clone_1160_seq_2	H11_PD1_KO_clonotype1965	1	TRA:CAASDNYGNEKITF
clone_1161_seq_2	H11_PD1_KO_clonotype1966	1	TRA:CAASGMSNYNVLYF
clone_1162_seq_2	H11_PD1_KO_clonotype1967	1	TRB:CASASTAYEQYF
clone_1163_seq_2	H11_PD1_KO_clonotype1968	1	TRB:CASGEIPSDYTF
clone_1164_seq_2	H11_PD1_KO_clonotype1969	1	TRB:CASSLHNSPLYF
clone_1165_seq_2	H11_PD1_KO_clonotype1970	1	TRB:CASHNANSDYTF
clone_1166_seq_2	H11_PD1_KO_clonotype1971	1	TRB:CASSPGTQEVFF
clone_1167_seq_2	H11_PD1_KO_clonotype1972	1	TRB:CASGDARGGDYAEQFF;TRA:CALSDYSNNRLTL;TRA:CALVSGYNKLTF
clone_1168_seq_2	H11_PD1_KO_clonotype1973	1	TRB:CASGETAETLYF;TRA:CILRVAQGTGSKLSF
clone_1169_seq_2	H11_PD1_KO_clonotype1974	1	TRB:CASGDGSAEQFF;TRA:CAIPGGSNAKLTF
clone_1170_seq_2	H11_PD1_KO_clonotype1975	1	TRB:CASGGYNSPLYF;TRA:CAAGSSNTNKVVF
clone_1171_seq_2	H11_PD1_KO_clonotype1977	1	TRB:CASGDNNSPLYF;TRA:CAAEAETGGYKVVF
clone_1172_seq_2	H11_PD1_KO_clonotype1978	1	TRB:CASGLGTGQLYF;TRA:CAASGNYGNEKITF;TRA:CAVSNNAGAKLTF
clone_1173_seq_2	H11_PD1_KO_clonotype1980	1	TRB:CASSRDGNTLYF;TRA:CAASKSEGADRLTF
clone_1174_seq_2	H11_PD1_KO_clonotype1981	1	TRB:CASSLDSYEQYF;TRA:CASTSNTNKVVF
clone_1175_seq_2	H11_PD1_KO_clonotype1982	1	TRB:CASSLAGNEQYF;TRA:CALGNSAGNKLTF
clone_1176_seq_2	H11_PD1_KO_clonotype1983	1	TRB:CASGDAGFEQYF;TRA:CAASEGTNAYKVIF
clone_1177_seq_2	H11_PD1_KO_clonotype1984	1	TRB:CASGVNQDTQYF;TRA:CAVSNVGDNSKLIW
clone_1178_seq_2	H11_PD1_KO_clonotype1985	1	TRB:CASSGLGSGQYF;TRA:CAVRYNTNTGKLTF
clone_1179_seq_2	H11_PD1_KO_clonotype1986	1	TRB:CASSWGAETLYF;TRA:CAANTGANTGKLTF
clone_1180_seq_2	H11_PD1_KO_clonotype1987	1	TRB:CASSLERVEQYF;TRB:CASSQGVQDTQYF;TRA:CAVSVGGSALGRLHF
clone_1181_seq_2	H11_PD1_KO_clonotype1988	1	TRB:CASGGGGGTKYF;TRA:CAASANYGNEKITF
clone_1182_seq_2	H11_PD1_KO_clonotype1989	1	TRB:CASSPSGAEVFF;TRA:CALSDDTNAYKVIF
clone_1183_seq_2	H11_PD1_KO_clonotype1990	1	TRA:CAASEDNYAQGLTF
clone_1184_seq_2	H11_PD1_KO_clonotype1991	1	TRA:CAASANTGNYKYVF
clone_1185_seq_2	H11_PD1_KO_clonotype1992	1	TRB:CASGNRGPTEVFF
clone_1186_seq_2	H11_PD1_KO_clonotype1993	1	TRB:CASGDRAGAEQFF
clone_1187_seq_2	H11_PD1_KO_clonotype1994	1	TRB:CASGDARGGEQYF
clone_1188_seq_2	H11_PD1_KO_clonotype1995	1	TRB:CASGDARGGEQYF
clone_1189_seq_2	H11_PD1_KO_clonotype1996	1	TRB:CASGAGVNQAPLF
clone_1190_seq_2	H11_PD1_KO_clonotype1997	1	TRB:CASGGQGKDTQYF
clone_1191_seq_2	H11_PD1_KO_clonotype1998	1	TRB:CASGGTANERLFF
clone_1192_seq_2	H11_PD1_KO_clonotype1999	1	TRB:CASSSGGADTQYF
clone_1193_seq_2	H11_PD1_KO_clonotype2000	1	TRB:CASSPTGNERLFF
clone_1194_seq_2	H11_PD1_KO_clonotype2001	1	TRB:CASSLGTEDTLYF
clone_1195_seq_2	H11_PD1_KO_clonotype2002	1	TRB:CASSLGTEDTLYF
clone_1196_seq_2	H11_PD1_KO_clonotype2003	1	TRB:CASSLGTEDTLYF
clone_1197_seq_2	H11_PD1_KO_clonotype2005	1	TRB:CASSLGGADTQYF
clone_1198_seq_2	H11_PD1_KO_clonotype2006	1	TRB:CASSLTGEDTQYF
clone_1199_seq_2	H11_PD1_KO_clonotype2008	1	TRB:CGSEQGADTEVFF
clone_1200_seq_2	H11_PD1_KO_clonotype2009	1	TRB:CASSPPDRNEQYF
clone_1201_seq_2	H11_PD1_KO_clonotype2011	1	TRB:CASGEGSGAEQFF;TRA:CAMGQGGSAKLIF
clone_1202_seq_2	H11_PD1_KO_clonotype2014	1	TRB:CASSLDTNTEVFF;TRA:CALENDTNAYKVIF;TRA:CAVSEHEYNQGKLIF
clone_1203_seq_2	H11_PD1_KO_clonotype2015	1	TRB:CASSQDWGYEQYF;TRA:CALEHDTNAYKVIF
clone_1204_seq_2	H11_PD1_KO_clonotype2016	1	TRB:CASGENWVYEQYF;TRA:CAAEDVNTGNYKYVF
clone_1205_seq_2	H11_PD1_KO_clonotype2017	1	TRB:CASGDWGAGPQYF;TRA:CAVTGTGSKLSF
clone_1206_seq_2	H11_PD1_KO_clonotype2018	1	TRB:CASSPDWGDTQYF;TRA:CAAEYYGSSGNKLIF
clone_1207_seq_2	H11_PD1_KO_clonotype2019	1	TRB:CASSLTENTEVFF;TRA:CALEHRAGNTGKLIF;TRA:CAMREGANYNVLYF
clone_1208_seq_2	H11_PD1_KO_clonotype2020	1	TRB:CASSLTGAYEQYF;TRA:CAVRNNNAPRF
clone_1209_seq_2	H11_PD1_KO_clonotype2021	1	TRB:CASSLDNQNTLYF;TRA:CILRARNSGGSNYKLTF
clone_1210_seq_2	H11_PD1_KO_clonotype2022	1	TRB:CASSLGDSYEQYF;TRA:CAAKGNNRIFF
clone_1211_seq_2	H11_PD1_KO_clonotype2023	1	TRB:CASSPGLGDEQYF;TRA:CAAAVASSSFSKLVF
clone_1212_seq_2	H11_PD1_KO_clonotype2024	1	TRB:CASSLGNTGQLYF;TRA:CAASTTGYQNFYF
clone_1213_seq_2	H11_PD1_KO_clonotype2025	1	TRB:CASLGDIQDTQYF;TRA:CATEASSGSWQLIF
clone_1214_seq_2	H11_PD1_KO_clonotype2026	1	TRB:CASGLGGQNTLYF;TRA:CALGGNSNNRIFF
clone_1215_seq_2	H11_PD1_KO_clonotype2027	1	TRB:CASGEPGPTEVFF;TRA:CAVRGTQVVGQLTF
clone_1216_seq_2	H11_PD1_KO_clonotype2028	1	TRB:CASGDVSQNTLYF;TRA:CAASRPGGNYKPTF
clone_1217_seq_2	H11_PD1_KO_clonotype2029	1	TRB:CASGDYGPMEQYF;TRA:CAGTTGANTGKLTF
clone_1218_seq_2	H11_PD1_KO_clonotype2030	1	TRB:CASSPGHNYEQYF;TRA:CAATYSNNRLTL
clone_1219_seq_2	H11_PD1_KO_clonotype2032	1	TRB:CASSLLGSYEQYF;TRA:CVLSMSNYNVLYF
clone_1220_seq_2	H11_PD1_KO_clonotype2033	1	TRB:CASSLVGNTEVFF;TRA:CAASERTNAYKVIF;TRA:CALSWYNQGKLIF
clone_1221_seq_2	H11_PD1_KO_clonotype2034	1	TRB:CASSLDREDTQYF;TRA:CAALNNNNAPRF
clone_1222_seq_2	H11_PD1_KO_clonotype2035	1	TRB:CASGEDRVYEQYF;TRA:CAVRDYGNEKITF
clone_1223_seq_2	H11_PD1_KO_clonotype2036	1	TRB:CASGETANSPLYF;TRA:CAMDTNTGKLTF
clone_1224_seq_2	H11_PD1_KO_clonotype2037	1	TRB:CASGDGGDDTLYF;TRA:CALSVSGSWQLIF
clone_1225_seq_2	H11_PD1_KO_clonotype2039	1	TRB:CASSLTGGNTLYF;TRA:CVLSAEVNYNVLYF
clone_1226_seq_2	H11_PD1_KO_clonotype2040	1	TRB:CASGLGGQNTLYF;TRB:CASGRLGGSSQNTLYF;TRA:CAASPYRGSALGRLHF
clone_1227_seq_2	H11_PD1_KO_clonotype2041	1	TRB:CASSLAGEDTLYF;TRA:CALGLDYSNNRLTL
clone_1228_seq_2	H11_PD1_KO_clonotype2042	1	TRB:CASSLAGGYEQYF;TRA:CAASSGTNTGKLTF
clone_1229_seq_2	H11_PD1_KO_clonotype2043	1	TRB:CASSSGLDYEQYF;TRA:CAASRNTNTGKLTF
clone_1230_seq_2	H11_PD1_KO_clonotype2044	1	TRB:CASGDSNTGQLYF;TRA:CAASMLNNNAGAKLTF
clone_1231_seq_2	H11_PD1_KO_clonotype2045	1	TRB:CASGDGGSYEQYF;TRA:CALGDRGSNAKLTF
clone_1232_seq_2	H11_PD1_KO_clonotype2046	1	TRB:CASSLVGGETLYF;TRA:CAARTGYQNFYF
clone_1233_seq_2	H11_PD1_KO_clonotype2047	1	TRB:CASGDWGGAEQYF;TRA:CAASYTGNYKYVF
clone_1234_seq_2	H11_PD1_KO_clonotype2048	1	TRB:CASSLEGGNTLYF;TRA:CAASGGSNAKLTF
clone_1235_seq_2	H11_PD1_KO_clonotype2049	1	TRB:CASSLGTSYEQYF;TRA:CAASPSNYNVLYF
clone_1236_seq_2	H11_PD1_KO_clonotype205	1	TRB:CASSQEGQGDERLFF;TRA:CAVSGSNNRIFF
clone_1237_seq_2	H11_PD1_KO_clonotype2050	1	TRB:CASGDGGSYEQYF;TRA:CAASVGNYAQGLTF
clone_1238_seq_2	H11_PD1_KO_clonotype2051	1	TRB:CASGDAANSDYTF;TRA:CAAGASSGSWQLIF
clone_1239_seq_2	H11_PD1_KO_clonotype2052	1	TRB:CASSLAGNSDYTF;TRA:CALSDRGFASALTF
clone_1240_seq_2	H11_PD1_KO_clonotype2053	1	TRB:CASGSTGDSYEQYF
clone_1241_seq_2	H11_PD1_KO_clonotype2054	1	TRB:CASGEVPGGNTLYF
clone_1242_seq_2	H11_PD1_KO_clonotype2055	1	TRB:CASGDLGVYAEQFF
clone_1243_seq_2	H11_PD1_KO_clonotype2056	1	TRB:CASGDEGTVQAPLF
clone_1244_seq_2	H11_PD1_KO_clonotype2058	1	TRB:CASGDAQSNTEVFF
clone_1245_seq_2	H11_PD1_KO_clonotype2059	1	TRB:CASGDAGSQNTLYF
clone_1246_seq_2	H11_PD1_KO_clonotype2060	1	TRB:CASGDGGGAYEQYF
clone_1247_seq_2	H11_PD1_KO_clonotype2061	1	TRB:CASGDWGDDERLFF
clone_1248_seq_2	H11_PD1_KO_clonotype2062	1	TRB:CASGGTGGAIEQYF
clone_1249_seq_2	H11_PD1_KO_clonotype2063	1	TRB:CASGVTGGAGEQYF
clone_1250_seq_2	H11_PD1_KO_clonotype2064	1	TRB:CASSRQTSAETLYF
clone_1251_seq_2	H11_PD1_KO_clonotype2065	1	TRB:CASSLEDANTEVFF
clone_1252_seq_2	H11_PD1_KO_clonotype2066	1	TRB:CASSLEDANTEVFF
clone_1253_seq_2	H11_PD1_KO_clonotype2067	1	TRB:CASSLWGGDYEQYF
clone_1254_seq_2	H11_PD1_KO_clonotype2068	1	TRB:CASSSTGGAREQYF
clone_1255_seq_2	H11_PD1_KO_clonotype2069	1	TRB:CASSRDRGYQAPLF
clone_1256_seq_2	H11_PD1_KO_clonotype2070	1	TRB:CASSRGQNAETLYF
clone_1257_seq_2	H11_PD1_KO_clonotype2071	1	TRB:CASSQTGGLGEQYF
clone_1258_seq_2	H11_PD1_KO_clonotype2072	1	TRB:CASSQTGGLGEQYF
clone_1259_seq_2	H11_PD1_KO_clonotype2073	1	TRB:CASSPRDWVYEQYF
clone_1260_seq_2	H11_PD1_KO_clonotype2075	1	TRB:CASSLERAFYEQYF
clone_1261_seq_2	H11_PD1_KO_clonotype2076	1	TRB:CASSLGGGGNTLYF
clone_1262_seq_2	H11_PD1_KO_clonotype2078	1	TRB:CASGDRDRVNTLYF;TRA:CANNNNAPRF
clone_1263_seq_2	H11_PD1_KO_clonotype2079	1	TRB:CASGPGLGGREQYF;TRA:CALERFNNRIFF
clone_1264_seq_2	H11_PD1_KO_clonotype208	1	TRB:CASSLGGDSPLYF;TRA:CALTGGYKVVF
clone_1265_seq_2	H11_PD1_KO_clonotype2080	1	TRB:CASGDAGLGVEQYF;TRA:CILRDQGGSAKLIF
clone_1266_seq_2	H11_PD1_KO_clonotype2081	1	TRB:CASSPADANTEVFF;TRA:CAAGPGGRALIF
clone_1267_seq_2	H11_PD1_KO_clonotype2082	1	TRB:CASSPWDVYAEQFF;TRA:CILRANTGYQNFYF
clone_1268_seq_2	H11_PD1_KO_clonotype2083	1	TRB:CASSLDWGAYEQYF;TRA:CALQGGSAKLIF
clone_1269_seq_2	H11_PD1_KO_clonotype2084	1	TRB:CASGDIRLSYEQYF;TRA:CAAGNTNTGKLTF;TRA:CALGMNYGSSGNKLIF
clone_1270_seq_2	H11_PD1_KO_clonotype2085	1	TRB:CASGEDSRAETLYF;TRA:CAAEDPGNYKYVF
clone_1271_seq_2	H11_PD1_KO_clonotype2086	1	TRB:CASGDNWGGYEQYF;TRA:CAASEDYQLIW
clone_1272_seq_2	H11_PD1_KO_clonotype2087	1	TRB:CASGDAGQGSDYTF;TRA:CALERNAGAKLTF
clone_1273_seq_2	H11_PD1_KO_clonotype2088	1	TRB:CASGDAGGGDEQYF;TRA:CALERNAGAKLTF
clone_1274_seq_2	H11_PD1_KO_clonotype2089	1	TRB:CASGDSGGGYEQYF;TRA:CALERNAGAKLTF
clone_1275_seq_2	H11_PD1_KO_clonotype2090	1	TRB:CASAPPGQGANSDYTF;TRB:CASGGTTSGNTLYF;TRA:CAIDDNAGAKLTF
clone_1276_seq_2	H11_PD1_KO_clonotype2091	1	TRB:CASSQDWGVAEQFF;TRA:CAMETSNTNKVVF
clone_1277_seq_2	H11_PD1_KO_clonotype2092	1	TRB:CASSLRPSQDTQYF;TRA:CAMRERNSNNRIFF;TRA:CAVNSNNRIFF
clone_1278_seq_2	H11_PD1_KO_clonotype2093	1	TRB:CASSLRLGDAEQFF;TRA:CIVPNSGGSNAKLTF
clone_1279_seq_2	H11_PD1_KO_clonotype2094	1	TRB:CASGDPGLGVTQYF;TRA:CAADLNTNTGKLTF
clone_1280_seq_2	H11_PD1_KO_clonotype2095	1	TRB:CASGDAQSNTEVFF;TRA:CALGNSGTYQRF
clone_1281_seq_2	H11_PD1_KO_clonotype2096	1	TRB:CASGDALGQDTQYF;TRA:CAVSRSNYQLIW
clone_1282_seq_2	H11_PD1_KO_clonotype2097	1	TRB:CASSAGTGQDTQYF;TRA:CAVKDSNNRLTL;TRA:CAWGMNYNQGKLIF
clone_1283_seq_2	H11_PD1_KO_clonotype2098	1	TRB:CASSLGLNQDTQYF;TRA:CAAERQGGSAKLIF
clone_1284_seq_2	H11_PD1_KO_clonotype2099	1	TRB:CASSAGGARAEQFF;TRA:CAMGMNYNQGKLIF
clone_1285_seq_2	H11_PD1_KO_clonotype2100	1	TRB:CASGEAGGGTEVFF;TRA:CAAPGYQNFYF
clone_1286_seq_2	H11_PD1_KO_clonotype2102	1	TRB:CASSPGWGPETLYF;TRA:CAIDRRGSAGNKLTF
clone_1287_seq_2	H11_PD1_KO_clonotype2103	1	TRB:CASSLYGGGTEVFF;TRA:CAVKAEGADRLTF
clone_1288_seq_2	H11_PD1_KO_clonotype2104	1	TRB:CASSLEDANTEVFF;TRA:CAVSNMGYKLTF
clone_1289_seq_2	H11_PD1_KO_clonotype2105	1	TRB:CASGPGTVGTEVFF;TRA:CAGVVSGSFNKLTF
clone_1290_seq_2	H11_PD1_KO_clonotype2106	1	TRB:CASGDRDRGDTQYF;TRA:CAVLTSGGNYKPTF
clone_1291_seq_2	H11_PD1_KO_clonotype2107	1	TRB:CASGDPISNERLFF;TRA:CAVTSNYNVLYF
clone_1292_seq_2	H11_PD1_KO_clonotype2108	1	TRB:CASGDEGTVQAPLF;TRA:CAAEVVGNTGYQNFYF;TRA:CATDGASSSFSKLVF
clone_1293_seq_2	H11_PD1_KO_clonotype2109	1	TRB:CASGASGGENTLYF;TRA:CAVSAPASLGKLQF
clone_1294_seq_2	H11_PD1_KO_clonotype2110	1	TRB:CASGGGGGQNTLYF;TRA:CAASSGSWQLIF;TRA:CAVSDNYAQGLTF
clone_1295_seq_2	H11_PD1_KO_clonotype2111	1	TRB:CASSLLGSAETLYF;TRA:CALGAHNNAPRF;TRA:CALSGRTGNTGKLIF
clone_1296_seq_2	H11_PD1_KO_clonotype2112	1	TRB:CASSGEISNERLFF;TRA:CALRATSSGQKLVF
clone_1297_seq_2	H11_PD1_KO_clonotype2113	1	TRB:CASSSGGASYEQYF;TRA:CAVSEGNMGYKLTF
clone_1298_seq_2	H11_PD1_KO_clonotype2114	1	TRB:CASSPGTGGFEQYF;TRA:CAMSEPSSGQKLVF
clone_1299_seq_2	H11_PD1_KO_clonotype2115	1	TRB:CASSPTGAGYEQYF;TRA:CALGGHNNRIFF
clone_1300_seq_2	H11_PD1_KO_clonotype2116	1	TRB:CASSLGGGSYEQYF;TRA:CAVSSITGNTGKLIF;TRA:CVVGNNNNAPRF
clone_1301_seq_2	H11_PD1_KO_clonotype2117	1	TRB:CASGDSYSGNTLYF;TRA:CALSLNQGKLIF
clone_1302_seq_2	H11_PD1_KO_clonotype2118	1	TRB:CASGGTGGTDTQYF;TRA:CAAGARAGNKLTF;TRA:CAVSAPSSGQKLVF
clone_1303_seq_2	H11_PD1_KO_clonotype2119	1	TRB:CASGETPSQNTLYF;TRA:CAVTSGSFNKLTF
clone_1304_seq_2	H11_PD1_KO_clonotype2120	1	TRB:CASGDAQGAYEQYF;TRA:CAASGPTSNTNKVVF
clone_1305_seq_2	H11_PD1_KO_clonotype2121	1	TRB:CASGDLGLQDTQYF;TRA:CAVRYTNAYKVIF
clone_1306_seq_2	H11_PD1_KO_clonotype2123	1	TRB:CASSGTGALDTQYF;TRA:CALGYNAGAKLTF
clone_1307_seq_2	H11_PD1_KO_clonotype2124	1	TRB:CASSPDWGGYEQYF;TRA:CVLSGNTGNYKYVF
clone_1308_seq_2	H11_PD1_KO_clonotype2125	1	TRB:CASSHWNRQNTLYF;TRA:CAVSPGGSNAKLTF
clone_1309_seq_2	H11_PD1_KO_clonotype2126	1	TRB:CASSLTGSYAEQFF;TRA:CATDNTGANTGKLTF
clone_1310_seq_2	H11_PD1_KO_clonotype2127	1	TRB:CASSLEQGDSPLYF;TRA:CATDPASSGSWQLIF
clone_1311_seq_2	H11_PD1_KO_clonotype213	1	TRB:CASSFGQTYEQYF;TRA:CALDGAGNTGKLIF
clone_1312_seq_2	H11_PD1_KO_clonotype2130	1	TRB:CASGDENSGNTLYF;TRA:CALGGNTNTGKLTF
clone_1313_seq_2	H11_PD1_KO_clonotype2131	1	TRB:CASGDAGGANTLYF;TRA:CALSDRTGNYKYVF;TRA:CVLSARTGNTGKLIF
clone_1314_seq_2	H11_PD1_KO_clonotype2132	1	TRB:CASGGLGGSYEQYF;TRA:CAASPNTGYQNFYF
clone_1315_seq_2	H11_PD1_KO_clonotype2133	1	TRB:CASSDSADTGQLYF;TRA:CALGSANTNKVVF
clone_1316_seq_2	H11_PD1_KO_clonotype2134	1	TRB:CASSLAGGYAEQFF;TRA:CVVGVSGSFNKLTF
clone_1317_seq_2	H11_PD1_KO_clonotype2135	1	TRB:CASSWDRWGNTLYF;TRA:CALWELDYGSSGNKLIF;TRA:CAVRTSSSFSKLVF
clone_1318_seq_2	H11_PD1_KO_clonotype2136	1	TRB:CASGSDRDGYEQYF;TRA:CALSDGSGYNKLTF
clone_1319_seq_2	H11_PD1_KO_clonotype2137	1	TRB:CASGPGTSAETLYF;TRA:CALRPPSGSWQLIF
clone_1320_seq_2	H11_PD1_KO_clonotype2138	1	TRB:CASGDALGQDTQYF;TRA:CALGDGAGGNNKLTF
clone_1321_seq_2	H11_PD1_KO_clonotype2139	1	TRB:CASGDGGANTEVFF;TRA:CALSDPGSGGKLTL
clone_1322_seq_2	H11_PD1_KO_clonotype2140	1	TRB:CASGADTSGNTLYF;TRA:CALGPSPTNAYKVIF
clone_1323_seq_2	H11_PD1_KO_clonotype2141	1	TRB:CASSRDWEQDTQYF;TRA:CALSLNVGDNSKLIW
clone_1324_seq_2	H11_PD1_KO_clonotype2142	1	TRB:CASGDDWGGYEQYF;TRA:CALSDLSGSFNKLTF
clone_1325_seq_2	H11_PD1_KO_clonotype2143	1	TRB:CASSPTGGFYEQYF;TRA:CAMREYDTNAYKVIF
clone_1326_seq_2	H11_PD1_KO_clonotype2144	1	TRB:CASSLDRSNERLFF;TRA:CALGDQQGGRALIF
clone_1327_seq_2	H11_PD1_KO_clonotype2145	1	TRB:CASSRDRDQDTQYF;TRA:CAVSLIASSSFSKLVF
clone_1328_seq_2	H11_PD1_KO_clonotype2146	1	TRB:CASSPDRDQNTLYF;TRA:CALGATGNTGKLIF
clone_1329_seq_2	H11_PD1_KO_clonotype2147	1	TRB:CASGDWTGGDTQYF;TRA:CAMREASSGSWQLIF
clone_1330_seq_2	H11_PD1_KO_clonotype2148	1	TRB:CASGDKPNTGQLYF;TRA:CAASVGTGSKLSF
clone_1331_seq_2	H11_PD1_KO_clonotype2149	1	TRB:CASSLGGANTEVFF;TRA:CAAIGSALGRLHF
clone_1332_seq_2	H11_PD1_KO_clonotype215	1	TRB:CASSPGLGGREQYF;TRA:CAVRMSNYNVLYF
clone_1333_seq_2	H11_PD1_KO_clonotype2150	1	TRB:CASSSQANTGQLYF;TRA:CAAGGTGGNNKLTF
clone_1334_seq_2	H11_PD1_KO_clonotype2151	1	TRB:CASSLDSSNERLFF;TRA:CAASARNSGTYQRF
clone_1335_seq_2	H11_PD1_KO_clonotype2152	1	TRB:CASSPLRNTGQLYF;TRA:CAASAGYSNNRLTL
clone_1336_seq_2	H11_PD1_KO_clonotype2153	1	TRB:CASSPWTGDAEQFF;TRA:CAASRNSGGSNYKLTF;TRA:CALSDDTGANTGKLTF
clone_1337_seq_2	H11_PD1_KO_clonotype2154	1	TRB:CASSPWVNYAEQFF;TRA:CAAKSGYWSSSSFSKLVF
clone_1338_seq_2	H11_PD1_KO_clonotype2155	1	TRB:CASGDAQGGNTLYF;TRA:CALSDPSSSFSKLVF
clone_1339_seq_2	H11_PD1_KO_clonotype2156	1	TRB:CASGDAWGEDTQYF;TRA:CALSFSGGSNYKLTF
clone_1340_seq_2	H11_PD1_KO_clonotype2157	1	TRB:CASGDATPQNTLYF;TRA:CALSDGGSSGNKLIF
clone_1341_seq_2	H11_PD1_KO_clonotype2158	1	TRB:CASSPHIANTEVFF;TRA:CALTSPSSSFSKLVF
clone_1342_seq_2	H11_PD1_KO_clonotype2159	1	TRB:CASSPGQNYAEQFF;TRA:CALSDLASSSFSKLVF
clone_1343_seq_2	H11_PD1_KO_clonotype2160	1	TRB:CASGESGGNYAEQFF
clone_1344_seq_2	H11_PD1_KO_clonotype2161	1	TRB:CASGDWGSNYAEQFF
clone_1345_seq_2	H11_PD1_KO_clonotype2162	1	TRB:CASGDRGGSQNTLYF
clone_1346_seq_2	H11_PD1_KO_clonotype2163	1	TRB:CASGDQGRGNSDYTF
clone_1347_seq_2	H11_PD1_KO_clonotype2164	1	TRB:CASGDGGGTYAEQFF
clone_1348_seq_2	H11_PD1_KO_clonotype2165	1	TRB:CASGDVGGSQNTLYF
clone_1349_seq_2	H11_PD1_KO_clonotype2166	1	TRB:CASGGTGKDNQAPLF
clone_1350_seq_2	H11_PD1_KO_clonotype2167	1	TRB:CASGGTGGNYAEQFF
clone_1351_seq_2	H11_PD1_KO_clonotype2168	1	TRB:CASGGTGGNYAEQFF
clone_1352_seq_2	H11_PD1_KO_clonotype2169	1	TRB:CASVGLGGRAETLYF
clone_1353_seq_2	H11_PD1_KO_clonotype2170	1	TRB:CASSLMTGSQNTLYF
clone_1354_seq_2	H11_PD1_KO_clonotype2171	1	TRB:CASSPRDWGTDTQYF
clone_1355_seq_2	H11_PD1_KO_clonotype2172	1	TRB:CASSPRDWGTDTQYF
clone_1356_seq_2	H11_PD1_KO_clonotype2173	1	TRB:CASSPRDWGTDTQYF
clone_1357_seq_2	H11_PD1_KO_clonotype2174	1	TRB:CASSPRDWGTDTQYF
clone_1358_seq_2	H11_PD1_KO_clonotype2175	1	TRB:CASSPAGTDYAEQFF
clone_1359_seq_2	H11_PD1_KO_clonotype2177	1	TRB:CASSPGTGGAYEQYF
clone_1360_seq_2	H11_PD1_KO_clonotype2178	1	TRB:CASSPGTGGANEQYF
clone_1361_seq_2	H11_PD1_KO_clonotype2179	1	TRB:CASSLEQNSGNTLYF
clone_1362_seq_2	H11_PD1_KO_clonotype2180	1	TRB:CASSLVWENYAEQFF
clone_1363_seq_2	H11_PD1_KO_clonotype2181	1	TRB:CASSLGTGGPYEQYF
clone_1364_seq_2	H11_PD1_KO_clonotype2182	1	TRB:CASSPGTGANSDYTF
clone_1365_seq_2	H11_PD1_KO_clonotype2183	1	TRB:CASSPGQGPNERLFF
clone_1366_seq_2	H11_PD1_KO_clonotype2184	1	TRB:CASSRTGTSQNTLYF
clone_1367_seq_2	H11_PD1_KO_clonotype2185	1	TRB:CASSRTGTSQNTLYF
clone_1368_seq_2	H11_PD1_KO_clonotype2186	1	TRB:CASSRTGTSQNTLYF
clone_1369_seq_2	H11_PD1_KO_clonotype2187	1	TRB:CASSRDNYSGNTLYF
clone_1370_seq_2	H11_PD1_KO_clonotype2188	1	TRB:CASSLSGYNYAEQFF
clone_1371_seq_2	H11_PD1_KO_clonotype2189	1	TRB:CASSLDRISNERLFF;TRA:CAADGNEKITF
clone_1372_seq_2	H11_PD1_KO_clonotype219	1	TRB:CASSLDWGNYAEQFF;TRA:CALANQGGSAKLIF
clone_1373_seq_2	H11_PD1_KO_clonotype2190	1	TRB:CASSLGPGDQNTLYF;TRA:CAAANSGTYQRF
clone_1374_seq_2	H11_PD1_KO_clonotype2191	1	TRB:CASGDDWGGAETLYF;TRA:CAAAYQGGRALIF
clone_1375_seq_2	H11_PD1_KO_clonotype2192	1	TRB:CASGDAGGASETLYF;TRA:CAAEYTNAYKVIF
clone_1376_seq_2	H11_PD1_KO_clonotype2193	1	TRB:CASGDAGTGRYEQYF;TRA:CAAEAGGNNKLTF
clone_1377_seq_2	H11_PD1_KO_clonotype2194	1	TRB:CASSPYRGSGNTLYF;TRA:CAAEAGGNEKITF
clone_1378_seq_2	H11_PD1_KO_clonotype2195	1	TRB:CASGDARLGGAEQFF;TRA:CASNTGYQNFYF
clone_1379_seq_2	H11_PD1_KO_clonotype2196	1	TRB:CASGDADWGQDTQYF;TRA:CAVNTGYQNFYF
clone_1380_seq_2	H11_PD1_KO_clonotype2197	1	TRB:CASGDVLINQDTQYF;TRA:CARDITGNTGKLIF
clone_1381_seq_2	H11_PD1_KO_clonotype2198	1	TRB:CASGGSGGAGAEQFF;TRA:CAAEAATNAYKVIF;TRA:CAATRGSNYKLTF
clone_1382_seq_2	H11_PD1_KO_clonotype2199	1	TRB:CASSLPDFNYAEQFF;TRA:CAMERRYNQGKLIF
clone_1383_seq_2	H11_PD1_KO_clonotype220	1	TRB:CASSPRGPATGQLYF;TRB:CASSRGHANTEVFF;TRA:CVLSAVTNAYKVIF
clone_1384_seq_2	H11_PD1_KO_clonotype2200	1	TRB:CASGDAGTTNSDYTF;TRA:CAASNSGSWQLIF;TRA:CAVGGTTASLGKLQF
clone_1385_seq_2	H11_PD1_KO_clonotype2201	1	TRB:CASSLTGGAQDTQYF;TRA:CAIDHSGGSNYKLTF
clone_1386_seq_2	H11_PD1_KO_clonotype2202	1	TRB:CASSLPGLGVDTQYF;TRA:CADYQGGRALIF
clone_1387_seq_2	H11_PD1_KO_clonotype2203	1	TRB:CASSLGVSYNSPLYF;TRA:CAVSAEGGRALIF
clone_1388_seq_2	H11_PD1_KO_clonotype2204	1	TRB:CASGGTGGADSDYTF;TRA:CAARTSSGQKLVF
clone_1389_seq_2	H11_PD1_KO_clonotype2205	1	TRB:CASSPGQGSNERLFF;TRA:CAAKGNYAQGLTF
clone_1390_seq_2	H11_PD1_KO_clonotype2206	1	TRB:CASSLEDRSSYEQYF;TRA:CAVSPYGSSGNKLIF
clone_1391_seq_2	H11_PD1_KO_clonotype2207	1	TRB:CASGPGLGNYAEQFF;TRA:CALSYGSSGNKLIF
clone_1392_seq_2	H11_PD1_KO_clonotype2208	1	TRB:CASGSGEGNTGQLYF;TRA:CAVSAPEGADRLTF
clone_1393_seq_2	H11_PD1_KO_clonotype2209	1	TRB:CASGDPGQGYSDYTF;TRA:CAASMNYNQGKLIF
clone_1394_seq_2	H11_PD1_KO_clonotype2210	1	TRB:CASGDAKGVQNTLYF;TRA:CAMENTNTGKLTF
clone_1395_seq_2	H11_PD1_KO_clonotype2211	1	TRB:CASGDAGGDYAEQFF;TRA:CALSDSAGNKLTF
clone_1396_seq_2	H11_PD1_KO_clonotype2213	1	TRB:CASGGPLGGQDTQYF;TRA:CAPLSGSFNKLTF
clone_1397_seq_2	H11_PD1_KO_clonotype2214	1	TRB:CASSLVWENYAEQFF;TRA:CALRSSGSWQLIF
clone_1398_seq_2	H11_PD1_KO_clonotype2215	1	TRB:CASSLENSYNSPLYF;TRA:CAARVTGNTGKLIF;TRA:CAMREFNVGDNSKLIW
clone_1399_seq_2	H11_PD1_KO_clonotype2216	1	TRB:CASGDRGLNTGQLYF;TRA:CAASEHPGTQVVGQLTF
clone_1400_seq_2	H11_PD1_KO_clonotype2217	1	TRB:CASGPRQGAPSDYTF;TRA:CVVGDRGSALGRLHF
clone_1401_seq_2	H11_PD1_KO_clonotype2218	1	TRB:CASGDAHFSNERLFF;TRA:CAASESNSAGNKLTF
clone_1402_seq_2	H11_PD1_KO_clonotype2219	1	TRB:CASGDAWGSQNTLYF;TRA:CAMRGNSNNRIFF
clone_1403_seq_2	H11_PD1_KO_clonotype2220	1	TRB:CASSLDWGVAETLYF;TRA:CAMREGYAQGLTF
clone_1404_seq_2	H11_PD1_KO_clonotype2221	1	TRB:CASGDAPGNNQAPLF;TRA:CAMREGNQGGSAKLIF
clone_1405_seq_2	H11_PD1_KO_clonotype2222	1	TRB:CASGDAGGLAETLYF;TRA:CAAQNQGGSAKLIF
clone_1406_seq_2	H11_PD1_KO_clonotype2223	1	TRB:CASGGTGGFQDTQYF;TRA:CAAKAGNTGKLIF
clone_1407_seq_2	H11_PD1_KO_clonotype2224	1	TRB:CASGDALRGGYEQYF;TRA:CAASSNYNQGKLIF
clone_1408_seq_2	H11_PD1_KO_clonotype2225	1	TRB:CASGDAPGRQDTQYF;TRA:CAASARGSSGNKLIF
clone_1409_seq_2	H11_PD1_KO_clonotype2226	1	TRB:CASSPGTGTNERLFF;TRA:CALSMGYKLTF
clone_1410_seq_2	H11_PD1_KO_clonotype2227	1	TRB:CASGGEGASANSDYTF
clone_1411_seq_2	H11_PD1_KO_clonotype2228	1	TRB:CASGEPGQSSAETLYF
clone_1412_seq_2	H11_PD1_KO_clonotype2229	1	TRB:CASGDAGGRSAETLYF
clone_1413_seq_2	H11_PD1_KO_clonotype2230	1	TRB:CASGDAGGRSAETLYF
clone_1414_seq_2	H11_PD1_KO_clonotype2231	1	TRB:CASGGDWGRSAETLYF
clone_1415_seq_2	H11_PD1_KO_clonotype2232	1	TRB:CASGGGLGLSAETLYF
clone_1416_seq_2	H11_PD1_KO_clonotype2233	1	TRB:CASSRDWGDEYAEQFF
clone_1417_seq_2	H11_PD1_KO_clonotype2234	1	TRB:CASSPDWGGNYAEQFF
clone_1418_seq_2	H11_PD1_KO_clonotype2235	1	TRB:CASSPDWGGNYAEQFF
clone_1419_seq_2	H11_PD1_KO_clonotype2236	1	TRB:CASSPDWGGNYAEQFF
clone_1420_seq_2	H11_PD1_KO_clonotype2238	1	TRB:CASGDRLGSNQDTQYF;TRA:CALSEGADRLTF
clone_1421_seq_2	H11_PD1_KO_clonotype2239	1	TRB:CASGDGLGGRSETLYF;TRA:CAVRYNAGAKLTF
clone_1422_seq_2	H11_PD1_KO_clonotype2240	1	TRB:CASSPSTGGARNTLYF;TRA:CALPYQGGRALIF
clone_1423_seq_2	H11_PD1_KO_clonotype2241	1	TRB:CASGIQGSSYNSPLYF;TRA:CAVSERNSNNRIFF
clone_1424_seq_2	H11_PD1_KO_clonotype2242	1	TRB:CASSLAGGGSQNTLYF;TRA:CAITSSGSWQLIF
clone_1425_seq_2	H11_PD1_KO_clonotype2243	1	TRB:CASSPRQGPSNERLFF;TRA:CAVSGTGNTGKLIF
clone_1426_seq_2	H11_PD1_KO_clonotype2244	1	TRB:CASSPRTRLYYAEQFF;TRA:CALSGFNNNNAPRF
clone_1427_seq_2	H11_PD1_KO_clonotype2245	1	TRB:CASGDRGHTNTGQLYF;TRA:CAMRDNTGANTGKLTF
clone_1428_seq_2	H11_PD1_KO_clonotype2246	1	TRB:CASGDAGSANTGQLYF;TRA:CAASGAGNKLTF
clone_1429_seq_2	H11_PD1_KO_clonotype2248	1	TRB:CASGPGTGGPNQDTQYF;TRA:CAVEPHDTNAYKVIF
clone_1430_seq_2	H11_PD1_KO_clonotype225	1	TRB:CASSPRTGNYAEQFF;TRA:CASNSGTYQRF
clone_1431_seq_2	H11_PD1_KO_clonotype237	1	TRB:CASSRGQPSQNTLYF;TRA:CALSGNYNQGKLIF
clone_1432_seq_2	H11_PD1_KO_clonotype248	1	TRB:CASSPRDSNYAEQFF;TRA:CALSGQGGRALIF;TRA:CAPLTNSAGNKLTF
clone_1433_seq_2	H11_PD1_KO_clonotype258	1	TRB:CASGDAWEQYF;TRA:CAVRDDTNAYKVIF
clone_1434_seq_2	H11_PD1_KO_clonotype260	1	TRB:CASGGEGREQYF;TRA:CAMRGGYNQGKLIF
clone_1435_seq_2	H11_PD1_KO_clonotype261	1	TRB:CASGDGKNTLYF;TRA:CAPTNSAGNKLTF
clone_1436_seq_2	H11_PD1_KO_clonotype268	1	TRB:CASSLGTTNSDYTF;TRA:CALSETSGGNYKPTF
clone_1437_seq_2	H11_PD1_KO_clonotype275	1	TRB:CASSRASSGNTLYF;TRA:CALGESSALGRLHF
clone_1438_seq_2	H11_PD1_KO_clonotype277	1	TRB:CASGEPQGAWAEQFF;TRA:CAVRAMATGGNNKLTF
clone_1439_seq_2	H11_PD1_KO_clonotype283	1	TRB:CARNTLYF;TRB:CASSLEISGNTLYF;TRA:CAVSQNSGGSNAKLTF
clone_1440_seq_2	H11_PD1_KO_clonotype284	1	TRB:CAWSLDWVYF
clone_1441_seq_2	H11_PD1_KO_clonotype285	1	TRB:CAWSLDWVYF
clone_1442_seq_2	H11_PD1_KO_clonotype287	1	TRB:CAWSLASSGNTLYF;TRB:CGAGTGGVFF;TRA:CALSDHNNRIFF
clone_1443_seq_2	H11_PD1_KO_clonotype288	1	TRB:CASSSTGVEQYF;TRB:CASSYEQYF;TRA:CALSDGTNTGKLTF
clone_1444_seq_2	H11_PD1_KO_clonotype289	1	TRB:CASGVEQYF;TRB:CASSHGTGGGYAEQFF;TRA:CAAMGTNKVVF;TRA:CATDVDYSNNRLTL
clone_1445_seq_2	H11_PD1_KO_clonotype290	1	TRA:CAMVSGTYQRF
clone_1446_seq_2	H11_PD1_KO_clonotype291	1	TRB:CAWRLGFEQYF
clone_1447_seq_2	H11_PD1_KO_clonotype292	1	TRB:CASSDGDTQYF
clone_1448_seq_2	H11_PD1_KO_clonotype294	1	TRB:CGATGGSDYTF
clone_1449_seq_2	H11_PD1_KO_clonotype295	1	TRB:CGARLGDTQYF
clone_1450_seq_2	H11_PD1_KO_clonotype296	1	TRB:CAWRQGAEQFF;TRA:CAAEANSGTYQRF
clone_1451_seq_2	H11_PD1_KO_clonotype297	1	TRB:CAWDSQDTQYF;TRA:CAPATGGNNKLTF
clone_1452_seq_2	H11_PD1_KO_clonotype298	1	TRB:CASSDVEQYF;TRA:CAMGRNNNNAPRF
clone_1453_seq_2	H11_PD1_KO_clonotype299	1	TRB:CASSQGTDYTF;TRA:CALELEGADRLTF
clone_1454_seq_2	H11_PD1_KO_clonotype300	1	TRB:CASSWDSSNTGQLYF;TRB:CAWTGESDYTF;TRA:CAATSSGQKLVF;TRA:CAVSARTNKVVF
clone_1455_seq_2	H11_PD1_KO_clonotype301	1	TRB:CAWSRGEAPLF;TRA:CAVSSNYNQGKLIF
clone_1456_seq_2	H11_PD1_KO_clonotype302	1	TRB:CASGQTEVFF;TRA:CVLGDGDYAQGLTF
clone_1457_seq_2	H11_PD1_KO_clonotype303	1	TRB:CASSDGDTQYF;TRA:CAARRSGSWQLIF
clone_1458_seq_2	H11_PD1_KO_clonotype305	1	TRB:CAWSLGQAPLF;TRA:CAASSKDYNQGKLIF
clone_1459_seq_2	H11_PD1_KO_clonotype306	1	TRB:CASGGYEQYF;TRA:CAVSATTSSFSKLVF
clone_1460_seq_2	H11_PD1_KO_clonotype307	1	TRB:CASGEVGNTLYF;TRB:CASSEGDTQYF;TRA:CAARASGSWQLIF
clone_1461_seq_2	H11_PD1_KO_clonotype309	1	TRB:CASTQGERLFF;TRA:CALSEGANTGKLTF
clone_1462_seq_2	H11_PD1_KO_clonotype310	1	TRB:CASSGEDTQYF;TRA:CALSDRYNQGKLIF
clone_1463_seq_2	H11_PD1_KO_clonotype311	1	TRA:CASNTNKVVF
clone_1464_seq_2	H11_PD1_KO_clonotype312	1	TRA:CAMGVGNEKITF
clone_1465_seq_2	H11_PD1_KO_clonotype313	1	TRB:CASSLYEQYF
clone_1466_seq_2	H11_PD1_KO_clonotype314	1	TRA:CAAEPNYNVLYF
clone_1467_seq_2	H11_PD1_KO_clonotype315	1	TRB:CAWSQGNDTQYF
clone_1468_seq_2	H11_PD1_KO_clonotype316	1	TRB:CASRTNTEVFF
clone_1469_seq_2	H11_PD1_KO_clonotype317	1	TRB:CASRYRDTQYF
clone_1470_seq_2	H11_PD1_KO_clonotype318	1	TRB:CASSDGTEVFF
clone_1471_seq_2	H11_PD1_KO_clonotype319	1	TRB:CASSDGDTQYF
clone_1472_seq_2	H11_PD1_KO_clonotype320	1	TRB:CASSQNTGQLYF
clone_1473_seq_2	H11_PD1_KO_clonotype321	1	TRB:CASRGQYAEQFF
clone_1474_seq_2	H11_PD1_KO_clonotype322	1	TRB:CASSSINERLFF
clone_1475_seq_2	H11_PD1_KO_clonotype323	1	TRB:CASSDRDEEVFF
clone_1476_seq_2	H11_PD1_KO_clonotype324	1	TRB:CASSDAAETLYF
clone_1477_seq_2	H11_PD1_KO_clonotype325	1	TRB:CASSDAAETLYF
clone_1478_seq_2	H11_PD1_KO_clonotype326	1	TRB:CASSDAAETLYF
clone_1479_seq_2	H11_PD1_KO_clonotype327	1	TRB:CASSEQNTEVFF
clone_1480_seq_2	H11_PD1_KO_clonotype328	1	TRB:CASSDAYNTLYF
clone_1481_seq_2	H11_PD1_KO_clonotype329	1	TRB:CASSDAYNTLYF
clone_1482_seq_2	H11_PD1_KO_clonotype330	1	TRB:CASSGTGDEQYF
clone_1483_seq_2	H11_PD1_KO_clonotype331	1	TRB:CASGTGGYEQYF
clone_1484_seq_2	H11_PD1_KO_clonotype332	1	TRB:CGARQGQDTQYF
clone_1485_seq_2	H11_PD1_KO_clonotype333	1	TRB:CGARPGSYEQYF
clone_1486_seq_2	H11_PD1_KO_clonotype334	1	TRB:CGARDNTGQLYF
clone_1487_seq_2	H11_PD1_KO_clonotype335	1	TRB:CGARDSAETLYF
clone_1488_seq_2	H11_PD1_KO_clonotype337	1	TRB:CGARGQGDTLYF
clone_1489_seq_2	H11_PD1_KO_clonotype338	1	TRB:CGAWTANSDYTF;TRA:CAASAAGYQNFYF;TRA:CAENTGYQNFYF
clone_1490_seq_2	H11_PD1_KO_clonotype339	1	TRB:CGASYRGSEQYF;TRA:CAASGPAGTGSNRLTF;TRA:CAVKWSNNRIFF
clone_1491_seq_2	H11_PD1_KO_clonotype340	1	TRB:CASSVRAEVFF;TRA:CAAHDTNAYKVIF
clone_1492_seq_2	H11_PD1_KO_clonotype341	1	TRB:CASSRGSDYTF;TRA:CAGSSNTNKVVF
clone_1493_seq_2	H11_PD1_KO_clonotype342	1	TRB:CASEADTGQLYF;TRA:CAVRNSNNRIFF
clone_1494_seq_2	H11_PD1_KO_clonotype343	1	TRB:CASSLSGGAGNTLYF;TRB:CASSQDTQYF;TRA:CAIANSGTYQRF
clone_1495_seq_2	H11_PD1_KO_clonotype344	1	TRB:CGARDRSYEQYF;TRA:CAVLPGTGSNRLTF
clone_1496_seq_2	H11_PD1_KO_clonotype345	1	TRB:CAWSLVGNTLYF;TRA:CAMEPINTGNYKYVF
clone_1497_seq_2	H11_PD1_KO_clonotype346	1	TRB:CATTGQDTQYF;TRA:CATDDTNAYKVIF
clone_1498_seq_2	H11_PD1_KO_clonotype347	1	TRB:CGARDWVYEQYF;TRA:CAVASSSFSKLVF
clone_1499_seq_2	H11_PD1_KO_clonotype348	1	TRB:CGARVNTGQLYF;TRA:CAARANSGTYQRF
clone_1500_seq_2	H11_PD1_KO_clonotype349	1	TRB:CAWSLGGREQYF;TRA:CAATITGNTGKLIF
clone_1501_seq_2	H11_PD1_KO_clonotype350	1	TRB:CASSDITEVFF;TRA:CALRGGNSNNRIFF
clone_1502_seq_2	H11_PD1_KO_clonotype351	1	TRB:CASSQGDPTF;TRA:CAVSAYTGNYKYVF
clone_1503_seq_2	H11_PD1_KO_clonotype352	1	TRB:CGARDRGAEQFF;TRA:CAAHRGSALGRLHF
clone_1504_seq_2	H11_PD1_KO_clonotype353	1	TRB:CGASSSQNTLYF;TRA:CALSYTGNYKYVF;TRA:CANYNVGDNSKLIW
clone_1505_seq_2	H11_PD1_KO_clonotype354	1	TRB:CASSQELGAYEQYF;TRB:CAWSLSQNTLYF;TRA:CAVLLRNSNNRIFF;TRA:CAVSPYNTNTGKLTF
clone_1506_seq_2	H11_PD1_KO_clonotype355	1	TRB:CASSQTGGEQYF;TRA:CAASTSGSWQLIF
clone_1507_seq_2	H11_PD1_KO_clonotype356	1	TRB:CARTGGGDTQYF;TRB:CASSFRTGGARTGQLYF;TRA:CALASGGNYKPTF
clone_1508_seq_2	H11_PD1_KO_clonotype357	1	TRB:CAWRLTIYEQYF;TRA:CVLSAGVGDNSKLIW
clone_1509_seq_2	H11_PD1_KO_clonotype358	1	TRB:CAWSPRGNTLYF;TRA:CAVETTASLGKLQF
clone_1510_seq_2	H11_PD1_KO_clonotype359	1	TRB:CASSDAAETLYF;TRB:CASSQDGRTGNERLFF;TRA:CAATRNNNNAPRF;TRA:CAVGNQGGSAKLIF
clone_1511_seq_2	H11_PD1_KO_clonotype360	1	TRB:CASIQGDTLYF;TRB:CASSEQNTEVFF;TRA:CAVSANYNQGKLIF
clone_1512_seq_2	H11_PD1_KO_clonotype361	1	TRB:CASSSYEQYF;TRA:CAVSAPGNTGKLIF
clone_1513_seq_2	H11_PD1_KO_clonotype363	1	TRB:CGAREGTGQLYF;TRA:CAVSAGNAGAKLTF
clone_1514_seq_2	H11_PD1_KO_clonotype365	1	TRB:CGAGISNERLFF;TRA:CSAIATNSAGNKLTF
clone_1515_seq_2	H11_PD1_KO_clonotype366	1	TRB:CGARGGAYEQYF;TRA:CALEGQTGFASALTF
clone_1516_seq_2	H11_PD1_KO_clonotype367	1	TRB:CASRDRGPEVFF;TRA:CAMREGTGGNNKLTF
clone_1517_seq_2	H11_PD1_KO_clonotype368	1	TRB:CASSDGGGEVFF;TRA:CAASWAGNKLTF
clone_1518_seq_2	H11_PD1_KO_clonotype369	1	TRB:CGARGDRNTLYF;TRA:CAARNSNNRIFF
clone_1519_seq_2	H11_PD1_KO_clonotype370	1	TRB:CASSDAGDEQYF;TRA:CAATGNTGKLIF
clone_1520_seq_2	H11_PD1_KO_clonotype371	1	TRB:CGAREGQNTLYF;TRA:CAAGADTGNYKYVF
clone_1521_seq_2	H11_PD1_KO_clonotype372	1	TRB:CASLRDKETLYF;TRA:CAAMNYNQGKLIF
clone_1522_seq_2	H11_PD1_KO_clonotype373	1	TRB:CAWTGQGTEVFF;TRA:CAASRGTNAYKVIF
clone_1523_seq_2	H11_PD1_KO_clonotype374	1	TRB:CASSDNTEVFF;TRB:CASSQDWGGATLYF;TRA:CAASVYQGGRALIF
clone_1524_seq_2	H11_PD1_KO_clonotype375	1	TRB:CAWSRWGEGQYF;TRA:CAASAGGNNAGAKLTF
clone_1525_seq_2	H11_PD1_KO_clonotype376	1	TRB:CASARHSDYTF;TRA:CALRLMATGGNNKLTF
clone_1526_seq_2	H11_PD1_KO_clonotype377	1	TRA:CAMESQGGRALIF
clone_1527_seq_2	H11_PD1_KO_clonotype378	1	TRA:CAMESQGGRALIF
clone_1528_seq_2	H11_PD1_KO_clonotype379	1	TRB:CASSPDSGVFF
clone_1529_seq_2	H11_PD1_KO_clonotype380	1	TRB:CASSQDQDTQYF
clone_1530_seq_2	H11_PD1_KO_clonotype381	1	TRB:CASSQEDTEVFF
clone_1531_seq_2	H11_PD1_KO_clonotype382	1	TRB:CASSQGEYEQYF
clone_1532_seq_2	H11_PD1_KO_clonotype383	1	TRB:CASSPGLFEQYF
clone_1533_seq_2	H11_PD1_KO_clonotype384	1	TRB:CASSRTGEEQYF
clone_1534_seq_2	H11_PD1_KO_clonotype386	1	TRB:CAWSLTGGREQYF
clone_1535_seq_2	H11_PD1_KO_clonotype387	1	TRB:CAWSLHSSYEQYF
clone_1536_seq_2	H11_PD1_KO_clonotype388	1	TRB:CAWSSDRGDEQYF
clone_1537_seq_2	H11_PD1_KO_clonotype389	1	TRA:CAAENNAGAKLTF
clone_1538_seq_2	H11_PD1_KO_clonotype390	1	TRB:CASSLEEVFF
clone_1539_seq_2	H11_PD1_KO_clonotype391	1	TRB:CASSRGEVFF
clone_1540_seq_2	H11_PD1_KO_clonotype392	1	TRB:CASRGGQDTQYF
clone_1541_seq_2	H11_PD1_KO_clonotype393	1	TRB:CASSERDTEVFF
clone_1542_seq_2	H11_PD1_KO_clonotype394	1	TRB:CASSGTNSDYTF
clone_1543_seq_2	H11_PD1_KO_clonotype395	1	TRB:CASGEGNERLFF
clone_1544_seq_2	H11_PD1_KO_clonotype397	1	TRB:CASSDNSQNTLYF
clone_1545_seq_2	H11_PD1_KO_clonotype398	1	TRB:CASSEAGGFEQYF
clone_1546_seq_2	H11_PD1_KO_clonotype399	1	TRB:CASSDGGATEVFF
clone_1547_seq_2	H11_PD1_KO_clonotype400	1	TRB:CGARQGGYAEQFF
clone_1548_seq_2	H11_PD1_KO_clonotype401	1	TRB:CGARTGRSYEQYF
clone_1549_seq_2	H11_PD1_KO_clonotype402	1	TRB:CGARERGRDTQYF
clone_1550_seq_2	H11_PD1_KO_clonotype403	1	TRB:CGARGVSNERLFF
clone_1551_seq_2	H11_PD1_KO_clonotype404	1	TRB:CGASGLGGYEQYF
clone_1552_seq_2	H11_PD1_KO_clonotype405	1	TRB:CAWSLGGQDTQYF;TRA:CILRAYGNEKITF
clone_1553_seq_2	H11_PD1_KO_clonotype406	1	TRB:CASSFQDTQYF;TRA:CATDSAGNKLTF
clone_1554_seq_2	H11_PD1_KO_clonotype408	1	TRB:CAWSQYNNQAPLF;TRA:CALGGSNAKLTF
clone_1555_seq_2	H11_PD1_KO_clonotype411	1	TRB:CASSGDPYEQYF;TRA:CALVPNTNKVVF;TRA:CAMREGKNTGYQNFYF
clone_1556_seq_2	H11_PD1_KO_clonotype412	1	TRB:CASRDSSGNTLYF;TRA:CEIGANTGKLTF
clone_1557_seq_2	H11_PD1_KO_clonotype413	1	TRB:CASSRTGEEQYF;TRA:CAMDGGSNAKLTF
clone_1558_seq_2	H11_PD1_KO_clonotype414	1	TRB:CASRQQDTQYF;TRB:CAWSLGGQNTLYF;TRA:CAVQVVGQLTF
clone_1559_seq_2	H11_PD1_KO_clonotype416	1	TRB:CASSDRNSDYTF;TRA:CASSTGGNNKLTF
clone_1560_seq_2	H11_PD1_KO_clonotype417	1	TRB:CGARDWGGAEQFF;TRA:CAAEASGSWQLIF
clone_1561_seq_2	H11_PD1_KO_clonotype418	1	TRB:CAWSLGDNAEQFF;TRB:CTCSAGGAETLYF;TRA:CAAASSGSWQLIF;TRA:CAMEQGNMGYKLTF
clone_1562_seq_2	H11_PD1_KO_clonotype419	1	TRB:CASRLGGYEQYF;TRA:CAPCITGNTGKLIF
clone_1563_seq_2	H11_PD1_KO_clonotype420	1	TRB:CASGDAYSDYTF;TRA:CAAEVSGGNYKPTF
clone_1564_seq_2	H11_PD1_KO_clonotype421	1	TRB:CASRVSANSDYTF;TRB:CASSRTGQDTQYF;TRA:CAAGTGANTGKLTF
clone_1565_seq_2	H11_PD1_KO_clonotype422	1	TRB:CGADWGGAETLYF;TRA:CAAEAGTGGYKVVF
clone_1566_seq_2	H11_PD1_KO_clonotype423	1	TRB:CGARLGGTYEQYF;TRA:CAMDPNTGNYKYVF
clone_1567_seq_2	H11_PD1_KO_clonotype424	1	TRB:CAWSLGGYAEQFF;TRA:CSARGNNRIFF;TRA:CVVGARDTNTGKLTF
clone_1568_seq_2	H11_PD1_KO_clonotype425	1	TRB:CASSEYRGNTLYF;TRB:CASSLQGANTEVFF;TRA:CAASGGSNAKLTF
clone_1569_seq_2	H11_PD1_KO_clonotype426	1	TRB:CASSDHRGGEQYF;TRA:CALSTGGYKVVF
clone_1570_seq_2	H11_PD1_KO_clonotype427	1	TRB:CASSLDRNTEVFF;TRB:CGARDSANTEVFF;TRA:CAARTGNTGKLIF
clone_1571_seq_2	H11_PD1_KO_clonotype428	1	TRB:CGARNRVGSDYTF;TRA:CALSGGNYKYVF
clone_1572_seq_2	H11_PD1_KO_clonotype429	1	TRB:CASSQSAETLYF;TRA:CAVSASSGSWQLIF
clone_1573_seq_2	H11_PD1_KO_clonotype430	1	TRB:CASSQTGFEQYF;TRA:CAVSDYQGGRALIF
clone_1574_seq_2	H11_PD1_KO_clonotype431	1	TRB:CASSDPPGGVYAEQFF;TRB:CASSESGDTQYF;TRA:CAARPNYGNEKITF;TRA:CALAGGYKVVF
clone_1575_seq_2	H11_PD1_KO_clonotype432	1	TRB:CASSGQNTEVFF;TRA:CALSARPALGRLHF
clone_1576_seq_2	H11_PD1_KO_clonotype433	1	TRB:CASGDPGERLFF;TRA:CAFITGNTGKLIF
clone_1577_seq_2	H11_PD1_KO_clonotype434	1	TRB:CASSDPGGTEVFF;TRB:CASSWTGQDTQYF;TRA:CALERSRGGSNYKLTF
clone_1578_seq_2	H11_PD1_KO_clonotype435	1	TRB:CASSDASQNTLYF;TRA:CATSSNTNKVVF
clone_1579_seq_2	H11_PD1_KO_clonotype436	1	TRB:CGAWDSSAETLYF;TRA:CALSGTNSAGNKLTF;TRA:CATEATQVVGQLTF
clone_1580_seq_2	H11_PD1_KO_clonotype438	1	TRB:CASSKQGAEQFF;TRA:CAASEQGGNTGKLIF
clone_1581_seq_2	H11_PD1_KO_clonotype439	1	TRB:CASSDTGVYEQYF;TRA:CAASGVTGSGGKLTL
clone_1582_seq_2	H11_PD1_KO_clonotype440	1	TRB:CASSGTDQNTLYF;TRA:CALGDHGNNRIFF
clone_1583_seq_2	H11_PD1_KO_clonotype441	1	TRB:CGASAGANTEVFF;TRA:CALGDPNTNKVVF;TRA:CALSPIITGNTGKLIF
clone_1584_seq_2	H11_PD1_KO_clonotype443	1	TRB:CASSQEGGTGGYEQYF;TRB:CAWSTGGYAEQFF;TRA:CAAKEVGDNSKLIW;TRA:CAVNNSGGSNAKLTF
clone_1585_seq_2	H11_PD1_KO_clonotype444	1	TRB:CASSRASSGNTLYF;TRB:CAWSPDRGPEVFF;TRA:CAVSPMDYANKMIF
clone_1586_seq_2	H11_PD1_KO_clonotype445	1	TRB:CAWSSSSGNTLYF;TRA:CALSEDYSNNRLTL
clone_1587_seq_2	H11_PD1_KO_clonotype446	1	TRB:CASSLDRVGVFF;TRA:CALLTGNTGKLIF
clone_1588_seq_2	H11_PD1_KO_clonotype447	1	TRB:CASSDWDQNTLYF;TRA:CALSMNYNQGKLIF
clone_1589_seq_2	H11_PD1_KO_clonotype448	1	TRB:CASSDARDSDYTF;TRA:CAVSASSGSWQLIF
clone_1590_seq_2	H11_PD1_KO_clonotype449	1	TRB:CASSSRTEVFF;TRA:CAMRENTGYQNFYF
clone_1591_seq_2	H11_PD1_KO_clonotype450	1	TRB:CASSRDRYEQYF;TRA:CALGASSNYQLIW
clone_1592_seq_2	H11_PD1_KO_clonotype451	1	TRB:CAWDWGNYAEQFF;TRA:CVLSARYGSSGNKLIF
clone_1593_seq_2	H11_PD1_KO_clonotype452	1	TRB:CASSADGDTEVFF;TRA:CALSDRPGGYKVVF
clone_1594_seq_2	H11_PD1_KO_clonotype453	1	TRB:CASLGLGYAEQFF;TRA:CALGENSGTYQRF
clone_1595_seq_2	H11_PD1_KO_clonotype454	1	TRB:CGARDGTHSDYTF;TRB:CTCSANSDYTF;TRA:CALEGGGSSSFSKLVF
clone_1596_seq_2	H11_PD1_KO_clonotype455	1	TRB:CASGDGGPYAEQFF;TRB:CAWSLTTNSDYTF;TRA:CALGQSGSFNKLTF
clone_1597_seq_2	H11_PD1_KO_clonotype456	1	TRB:CARLLYEQYF;TRB:CGARDGWGDSQNTLYF;TRA:CAMRARGSALGRLHF
clone_1598_seq_2	H11_PD1_KO_clonotype457	1	TRB:CASSAGADTQYF;TRA:CALSDRYGSSGNKLIF
clone_1599_seq_2	H11_PD1_KO_clonotype458	1	TRB:CASSLREQYF;TRA:CAASDAQGLTF
clone_1600_seq_2	H11_PD1_KO_clonotype459	1	TRB:CASGAGYSDYTF;TRA:CAAKGGADRLTF
clone_1601_seq_2	H11_PD1_KO_clonotype460	1	TRB:CGARLGGGTEQFF;TRA:CAASGGGRALIF
clone_1602_seq_2	H11_PD1_KO_clonotype461	1	TRB:CARGLGGEEQYF;TRA:CAAGDTEGADRLTF
clone_1603_seq_2	H11_PD1_KO_clonotype462	1	TRB:CASPGQGYEQYF;TRB:CASSQDGRTGKGEVFF;TRA:CAASRANNNAPRF
clone_1604_seq_2	H11_PD1_KO_clonotype463	1	TRB:CASGTTSQNTLYF;TRA:CAAGAPSSFSKLVF
clone_1605_seq_2	H11_PD1_KO_clonotype464	1	TRB:CAWSLTGVYEQYF;TRA:CAASDAGSFNKLTF
clone_1606_seq_2	H11_PD1_KO_clonotype465	1	TRB:CASRDWGGEQYF;TRA:CAASANYGNEKITF
clone_1607_seq_2	H11_PD1_KO_clonotype466	1	TRB:CGAQDRAGNTLYF;TRA:CAAMNYNQGKLIF
clone_1608_seq_2	H11_PD1_KO_clonotype467	1	TRB:CAWSLDSHTEVFF;TRA:CAASGGDYANKMIF
clone_1609_seq_2	H11_PD1_KO_clonotype468	1	TRB:CSSPGGARDTQYF;TRA:CAASTGTGGYKVVF
clone_1610_seq_2	H11_PD1_KO_clonotype469	1	TRA:CAAHTNAYKVIF
clone_1611_seq_2	H11_PD1_KO_clonotype470	1	TRA:CAANTGYQNFYF
clone_1612_seq_2	H11_PD1_KO_clonotype471	1	TRA:CALERGYGNEKITF
clone_1613_seq_2	H11_PD1_KO_clonotype472	1	TRA:CALERGYGNEKITF
clone_1614_seq_2	H11_PD1_KO_clonotype473	1	TRA:CALERGYGNEKITF
clone_1615_seq_2	H11_PD1_KO_clonotype475	1	TRB:CASSSGDSDYTF
clone_1616_seq_2	H11_PD1_KO_clonotype476	1	TRB:CASSQEGGTEVFF
clone_1617_seq_2	H11_PD1_KO_clonotype477	1	TRB:CASSQDSAETLYF
clone_1618_seq_2	H11_PD1_KO_clonotype478	1	TRA:CAAEALSNYNVLYF
clone_1619_seq_2	H11_PD1_KO_clonotype479	1	TRA:CAAEESSGSWQLIF
clone_1620_seq_2	H11_PD1_KO_clonotype481	1	TRA:CAAEAWSGYNKLTF
clone_1621_seq_2	H11_PD1_KO_clonotype483	1	TRA:CAAEFMSNYNVLYF
clone_1622_seq_2	H11_PD1_KO_clonotype485	1	TRB:CAWNWGGNQDTQYF
clone_1623_seq_2	H11_PD1_KO_clonotype486	1	TRB:CAWRPQGAGNTLYF
clone_1624_seq_2	H11_PD1_KO_clonotype487	1	TRB:CAWSHGHGNSPLYF
clone_1625_seq_2	H11_PD1_KO_clonotype489	1	TRB:CAWSLTRGGSDYTF
clone_1626_seq_2	H11_PD1_KO_clonotype490	1	TRB:CAWSLEGLQDTQYF
clone_1627_seq_2	H11_PD1_KO_clonotype491	1	TRB:CAWSLQGGGAEQFF
clone_1628_seq_2	H11_PD1_KO_clonotype492	1	TRB:CAWIRLGGQNTLYF
clone_1629_seq_2	H11_PD1_KO_clonotype493	1	TRB:CASSLRDEQYF
clone_1630_seq_2	H11_PD1_KO_clonotype494	1	TRB:CASSFSYEQYF
clone_1631_seq_2	H11_PD1_KO_clonotype495	1	TRB:CASSKGQYEQYF
clone_1632_seq_2	H11_PD1_KO_clonotype496	1	TRB:CASSTGDTQYF
clone_1633_seq_2	H11_PD1_KO_clonotype497	1	TRB:CASSSAETLYF
clone_1634_seq_2	H11_PD1_KO_clonotype498	1	TRB:CASSLDREVFF
clone_1635_seq_2	H11_PD1_KO_clonotype500	1	TRB:CASRLGETLYF
clone_1636_seq_2	H11_PD1_KO_clonotype501	1	TRB:CASSRNYEQYF
clone_1637_seq_2	H11_PD1_KO_clonotype502	1	TRB:CASSGGDTQYF
clone_1638_seq_2	H11_PD1_KO_clonotype503	1	TRB:CASTGGSSYEQYF
clone_1639_seq_2	H11_PD1_KO_clonotype504	1	TRB:CASRDSNNQAPLF
clone_1640_seq_2	H11_PD1_KO_clonotype506	1	TRB:CASSDANNYEQYF
clone_1641_seq_2	H11_PD1_KO_clonotype507	1	TRB:CASSGQYNSPLYF
clone_1642_seq_2	H11_PD1_KO_clonotype508	1	TRB:CASSGGAHAEQFF
clone_1643_seq_2	H11_PD1_KO_clonotype509	1	TRB:CASGHANTGQLYF
clone_1644_seq_2	H11_PD1_KO_clonotype510	1	TRB:CASSDIYNSPLYF
clone_1645_seq_2	H11_PD1_KO_clonotype511	1	TRB:CASGDAGASDYTF
clone_1646_seq_2	H11_PD1_KO_clonotype513	1	TRB:CASGGQGGNTLYF
clone_1647_seq_2	H11_PD1_KO_clonotype515	1	TRB:CASSDRLSSYEQYF
clone_1648_seq_2	H11_PD1_KO_clonotype516	1	TRB:CASSDRTANTEVFF
clone_1649_seq_2	H11_PD1_KO_clonotype517	1	TRB:CASSDRTANTEVFF
clone_1650_seq_2	H11_PD1_KO_clonotype518	1	TRB:CASSDGRDQDTQYF
clone_1651_seq_2	H11_PD1_KO_clonotype519	1	TRB:CASSDSGGKDTQYF
clone_1652_seq_2	H11_PD1_KO_clonotype520	1	TRB:CASSDSGGKDTQYF
clone_1653_seq_2	H11_PD1_KO_clonotype521	1	TRB:CASSADWGADTQYF
clone_1654_seq_2	H11_PD1_KO_clonotype524	1	TRB:CASSLRGYEQYF
clone_1655_seq_2	H11_PD1_KO_clonotype525	1	TRB:CASSYNNYEQYF
clone_1656_seq_2	H11_PD1_KO_clonotype526	1	TRB:CASSSNYAEQFF
clone_1657_seq_2	H11_PD1_KO_clonotype527	1	TRB:CASSFPNSDYTF
clone_1658_seq_2	H11_PD1_KO_clonotype528	1	TRB:CSSRELGGGAEQFF
clone_1659_seq_2	H11_PD1_KO_clonotype529	1	TRB:CGARAGGSQNTLYF
clone_1660_seq_2	H11_PD1_KO_clonotype530	1	TRB:CGARDTASGNTLYF
clone_1661_seq_2	H11_PD1_KO_clonotype531	1	TRB:CAWSLGQGAETLYF;TRA:CGGGRQGKLIF
clone_1662_seq_2	H11_PD1_KO_clonotype532	1	TRB:CGAREGQGSYEQYF;TRA:CIVTDRGGRALIF
clone_1663_seq_2	H11_PD1_KO_clonotype533	1	TRB:CASSPTGGGNTLYF;TRB:CASSQEGTGQLYF;TRA:CATGNSAGNKLTF
clone_1664_seq_2	H11_PD1_KO_clonotype534	1	TRB:CAWSLEGGGNTLYF;TRA:CAIGSAGNKLTF
clone_1665_seq_2	H11_PD1_KO_clonotype535	1	TRB:CAWSLGGSNERLFF;TRA:CATMTNSAGNKLTF;TRA:CAVGTNTGKLTF
clone_1666_seq_2	H11_PD1_KO_clonotype536	1	TRB:CASRKGTLNSDYTF;TRA:CALETNAYKVIF;TRA:CAVDNTNTGKLTF
clone_1667_seq_2	H11_PD1_KO_clonotype537	1	TRB:CASSHGRNTLYF;TRA:CILRVEGNTGKLIF
clone_1668_seq_2	H11_PD1_KO_clonotype538	1	TRB:CASSSDKYEQYF;TRA:CAAENYAQGLTF
clone_1669_seq_2	H11_PD1_KO_clonotype540	1	TRB:CASGPRQGVWDTQYF;TRB:CASRSGVAEVFF;TRA:CAAEGGRALIF
clone_1670_seq_2	H11_PD1_KO_clonotype541	1	TRB:CASSQGESYEQYF;TRA:CAAENTNTGKLTF
clone_1671_seq_2	H11_PD1_KO_clonotype542	1	TRB:CASSRDRYAEQFF;TRA:CAIDRTGGYKVVF;TRA:CAVRVNSNNRIFF
clone_1672_seq_2	H11_PD1_KO_clonotype543	1	TRB:CAWSLRTANTEVFF;TRB:CTCSARGNNERLFF;TRA:CAGTNAYKVIF
clone_1673_seq_2	H11_PD1_KO_clonotype545	1	TRB:CASRGNSDYTF;TRA:CGGSSGNKLIF
clone_1674_seq_2	H11_PD1_KO_clonotype546	1	TRB:CASSLSHEQYF;TRA:CAPHSGGNYKPTF;TRA:CARTQVVGQLTF
clone_1675_seq_2	H11_PD1_KO_clonotype547	1	TRB:CASSDGEQDTQYF;TRA:CAIAPGNTGKLIF
clone_1676_seq_2	H11_PD1_KO_clonotype548	1	TRB:CASSDPRAGTLYF;TRA:CAAEPQGGRALIF
clone_1677_seq_2	H11_PD1_KO_clonotype549	1	TRB:CASSGTGRDTQYF;TRA:CAAGNNYAQGLTF
clone_1678_seq_2	H11_PD1_KO_clonotype550	1	TRB:CGARIAGGNERLFF;TRA:CALEHNYAQGLTF
clone_1679_seq_2	H11_PD1_KO_clonotype551	1	TRB:CGARGGTGGYEQYF;TRA:CAMRRTNTGKLTF
clone_1680_seq_2	H11_PD1_KO_clonotype552	1	TRB:CASSRTAYEQYF;TRA:CAIDETGNTGKLIF
clone_1681_seq_2	H11_PD1_KO_clonotype553	1	TRB:CASSLPGDEQYF;TRA:CAIDRNNYAQGLTF
clone_1682_seq_2	H11_PD1_KO_clonotype554	1	TRB:CASSFRVDTQYF;TRA:CALPNYNQGKLIF;TRA:CAVSMRAQGLTF
clone_1683_seq_2	H11_PD1_KO_clonotype555	1	TRB:CAWSHRDNNQAPLF;TRA:CAARDSNYQLIW
clone_1684_seq_2	H11_PD1_KO_clonotype556	1	TRB:CAWSLRDWGYEQYF;TRA:CAAIYSNYQLIW
clone_1685_seq_2	H11_PD1_KO_clonotype557	1	TRB:CAWSLGTGEDEQYF;TRA:CAMGQQGTGSKLSF
clone_1686_seq_2	H11_PD1_KO_clonotype558	1	TRB:CASSLGDTQYF;TRA:CAAYTGANTGKLTF
clone_1687_seq_2	H11_PD1_KO_clonotype559	1	TRB:CASSDVGGGEQYF;TRA:CAVDTNAYKVIF
clone_1688_seq_2	H11_PD1_KO_clonotype561	1	TRB:CASGDARGGEQYF;TRB:CASSEWGQGWDTQYF;TRA:CALSGTNSAGNKLTF;TRA:CAVSYSNNRIFF
clone_1689_seq_2	H11_PD1_KO_clonotype562	1	TRB:CASGAGTHAEQFF;TRA:CAPDTNAYKVIF
clone_1690_seq_2	H11_PD1_KO_clonotype563	1	TRB:CASRGQANTGQLYF;TRA:CAASGAGNKLTF
clone_1691_seq_2	H11_PD1_KO_clonotype564	1	TRB:CASSDQGAGAEQFF;TRA:CAAGVNTGNYKYVF
clone_1692_seq_2	H11_PD1_KO_clonotype566	1	TRB:CASGETRGISNERLFF;TRB:CGASPGQNYAEQFF;TRA:CAIERGSALGRLHF
clone_1693_seq_2	H11_PD1_KO_clonotype567	1	TRB:CASSLDQNTLYF;TRA:CAVSGAGYQNFYF
clone_1694_seq_2	H11_PD1_KO_clonotype568	1	TRB:CASKQGNTGQLYF;TRA:CAMINTGYQNFYF;TRA:CAVSADGSSGNKLIF
clone_1695_seq_2	H11_PD1_KO_clonotype569	1	TRB:CAWRGGSYNSPLYF;TRA:CALGASNTNKVVF;TRA:CAVSPSNYNVLYF
clone_1696_seq_2	H11_PD1_KO_clonotype570	1	TRB:CAWSPTGRNTEVFF;TRA:CAMERFLSNYNVLYF
clone_1697_seq_2	H11_PD1_KO_clonotype571	1	TRB:CASSGTVSNERLFF;TRB:CAWSRGQSNTEVFF;TRA:CAARYTNAYKVIF;TRA:CALGNYQLIW
clone_1698_seq_2	H11_PD1_KO_clonotype572	1	TRB:CAWSLSRGGNTLYF;TRA:CAGATGGNNKLTF
clone_1699_seq_2	H11_PD1_KO_clonotype573	1	TRB:CASSSGSTLYF;TRA:CAARYQGGRALIF
clone_1700_seq_2	H11_PD1_KO_clonotype574	1	TRB:CASGRQGRREQYF;TRA:CAVRGANTGKLTF
clone_1701_seq_2	H11_PD1_KO_clonotype575	1	TRB:CASGDVRGTEVFF;TRA:CAASIQGGRALIF
clone_1702_seq_2	H11_PD1_KO_clonotype576	1	TRB:CASSLDRAGNTLYF;TRB:CASSRQGANTEVFF;TRA:CAALNNVGDNSKLIW
clone_1703_seq_2	H11_PD1_KO_clonotype577	1	TRB:CASSEGGGRYEQYF;TRA:CAMREDTNTGKLTF;TRA:CVLRTGSFNKLTF
clone_1704_seq_2	H11_PD1_KO_clonotype578	1	TRB:CASSLRDSDYTF;TRA:CAVSMNNNAGAKLTF;TRA:CAVSVNNNAPRF
clone_1705_seq_2	H11_PD1_KO_clonotype579	1	TRB:CASSLRDSDYTF;TRB:CASSRGDRKAEQFF;TRA:CAVSMNNNAGAKLTF;TRA:CAVSVNNNAPRF
clone_1706_seq_2	H11_PD1_KO_clonotype580	1	TRB:CASSGTGDTQYF;TRA:CAVTGNMGYKLTF
clone_1707_seq_2	H11_PD1_KO_clonotype581	1	TRB:CASSLTEGRLFF;TRA:CALSDHVGDNSKLIW;TRA:CAVSATNTNKVVF
clone_1708_seq_2	H11_PD1_KO_clonotype582	1	TRB:CASSLGTKYAEQFF;TRB:CGARKGGGYAEQFF;TRA:CAAGSGGNYKPTF
clone_1709_seq_2	H11_PD1_KO_clonotype583	1	TRB:CASSQEWGVEQYF;TRA:CALSTGYQNFYF
clone_1710_seq_2	H11_PD1_KO_clonotype584	1	TRB:CASSQVGGDTQYF;TRA:CALGENTNKVVF
clone_1711_seq_2	H11_PD1_KO_clonotype585	1	TRB:CAWSLGTGPYEQYF;TRA:CAVSMDTNAYKVIF
clone_1712_seq_2	H11_PD1_KO_clonotype586	1	TRB:CASSLREEVFF;TRA:CALSAYQGGRALIF
clone_1713_seq_2	H11_PD1_KO_clonotype587	1	TRB:CASSSSETLYF;TRA:CAAPLSGSFNKLTF
clone_1714_seq_2	H11_PD1_KO_clonotype588	1	TRB:CASRDRAGNTLYF;TRA:CAVSDYSNNRLTL
clone_1715_seq_2	H11_PD1_KO_clonotype590	1	TRB:CASSDNSNERLFF;TRA:CAASERGGNYKYVF
clone_1716_seq_2	H11_PD1_KO_clonotype591	1	TRB:CASGGDWEYEQYF;TRA:CAMVNYNVLYF
clone_1717_seq_2	H11_PD1_KO_clonotype592	1	TRB:CASSINNYNSPLYF;TRB:CASSPTSSQNTLYF;TRA:CAVRVGYGNEKITF
clone_1718_seq_2	H11_PD1_KO_clonotype593	1	TRB:CASSDRTANTEVFF;TRB:CTCSADGGYNYAEQFF;TRA:CALKGNNRIFF
clone_1719_seq_2	H11_PD1_KO_clonotype594	1	TRB:CASSDPPANSDYTF;TRA:CAMRDDNYAQGLTF
clone_1720_seq_2	H11_PD1_KO_clonotype595	1	TRB:CASSDGGGQNTLYF;TRA:CACNNAGAKLTF
clone_1721_seq_2	H11_PD1_KO_clonotype596	1	TRB:CASSSGGGAETLYF;TRA:CAVSIGTNTGKLTF
clone_1722_seq_2	H11_PD1_KO_clonotype597	1	TRB:CASRGQGGEQYF;TRA:CAQGYNQGKLIF
clone_1723_seq_2	H11_PD1_KO_clonotype598	1	TRB:CASSLYAAEQFF;TRA:CAVSALEGADRLTF
clone_1724_seq_2	H11_PD1_KO_clonotype600	1	TRB:CAWSLGQYNSPLYF;TRA:CAASRTNTGKLTF
clone_1725_seq_2	H11_PD1_KO_clonotype601	1	TRB:CAWSLRINYAEQFF;TRA:CSARGSALGRLHF
clone_1726_seq_2	H11_PD1_KO_clonotype602	1	TRB:CASKRAGAYEQYF;TRA:CAVSIDTGYQNFYF
clone_1727_seq_2	H11_PD1_KO_clonotype603	1	TRB:CASSDPSNTEVFF;TRA:CAPPDSNYQLIW
clone_1728_seq_2	H11_PD1_KO_clonotype604	1	TRB:CASSDWGAYEQYF;TRA:CAMREPNTGNYKYVF
clone_1729_seq_2	H11_PD1_KO_clonotype605	1	TRB:CASSGTANTEVFF;TRA:CAASMDYANKMIF
clone_1730_seq_2	H11_PD1_KO_clonotype606	1	TRB:CASSGDRDTEVFF;TRA:CAVSRNSNNRIFF
clone_1731_seq_2	H11_PD1_KO_clonotype607	1	TRB:CASRRSGGQDTQYF;TRA:CALSVASSGSWQLIF
clone_1732_seq_2	H11_PD1_KO_clonotype608	1	TRB:CASSDQVSGNTLYF;TRA:CAVSNTGGLSGKLTF
clone_1733_seq_2	H11_PD1_KO_clonotype609	1	TRB:CASSQGGSDYTF;TRA:CAVSGTGYQNFYF
clone_1734_seq_2	H11_PD1_KO_clonotype610	1	TRB:CASSQGLDEQYF;TRA:CATYLPGTGSNRLTF
clone_1735_seq_2	H11_PD1_KO_clonotype611	1	TRB:CGARDWGSSYEQYF;TRA:CALGLNNRIFF
clone_1736_seq_2	H11_PD1_KO_clonotype612	1	TRB:CARSQGVSNERLFF;TRB:CASSQDRPGQLYF;TRA:CAVSVSSGSWQLIF
clone_1737_seq_2	H11_PD1_KO_clonotype613	1	TRB:CAWRTGGGNERLFF;TRA:CAASGATGYQNFYF
clone_1738_seq_2	H11_PD1_KO_clonotype615	1	TRB:CAWSRPGGNAEQFF;TRA:CALSGNTGNYKYVF
clone_1739_seq_2	H11_PD1_KO_clonotype616	1	TRB:CASARQGLVFF;TRA:CAVSANTEGADRLTF
clone_1740_seq_2	H11_PD1_KO_clonotype618	1	TRB:CASGINQDTQYF;TRA:CAVSPITGNTGKLIF
clone_1741_seq_2	H11_PD1_KO_clonotype619	1	TRB:CASSPGVEVFF;TRA:CALGDNYGNEKITF
clone_1742_seq_2	H11_PD1_KO_clonotype620	1	TRB:CASQGGSGNTLYF;TRA:CASPHDTNAYKVIF
clone_1743_seq_2	H11_PD1_KO_clonotype621	1	TRB:CASGDARAETLYF;TRA:CALSVNSAGNKLTF
clone_1744_seq_2	H11_PD1_KO_clonotype622	1	TRB:CGARVGTGNTEVFF;TRA:CAASGGNMGYKLTF
clone_1745_seq_2	H11_PD1_KO_clonotype623	1	TRB:CASSQETAETLYF;TRA:CAASMANYGNEKITF
clone_1746_seq_2	H11_PD1_KO_clonotype624	1	TRB:CAWRNWGGSYEQYF;TRA:CALSDRGNQGKLIF
clone_1747_seq_2	H11_PD1_KO_clonotype625	1	TRB:CAWRYRGWNTEVFF;TRA:CAASEPLASSSFSKLVF
clone_1748_seq_2	H11_PD1_KO_clonotype626	1	TRB:CAWSLGISNERLFF;TRA:CAVSGYGSSGNKLIF
clone_1749_seq_2	H11_PD1_KO_clonotype627	1	TRB:CASSDLGGYEQYF;TRA:CAASKGSSSFSKLVF
clone_1750_seq_2	H11_PD1_KO_clonotype628	1	TRB:CASSASSGNTLYF;TRA:CVLSEMNQGGSAKLIF
clone_1751_seq_2	H11_PD1_KO_clonotype629	1	TRB:CASSGGAHAEQFF;TRB:CASSLAQGRDTEVFF;TRA:CAASPLDTNAYKVIF;TRA:CVVGPYGSSGNKLIF
clone_1752_seq_2	H11_PD1_KO_clonotype630	1	TRB:CASSGPRQGYEQYF;TRA:CALSSSGSWQLIF
clone_1753_seq_2	H11_PD1_KO_clonotype631	1	TRB:CASSLDSGEVFF;TRA:CALNHDSGYNKLTF
clone_1754_seq_2	H11_PD1_KO_clonotype632	1	TRB:CAWRTGTANERLFF;TRA:CALSGRNNYAQGLTF
clone_1755_seq_2	H11_PD1_KO_clonotype633	1	TRB:CAWSPGQSNERLFF;TRA:CAMREGPNTGKLTF
clone_1756_seq_2	H11_PD1_KO_clonotype634	1	TRB:CAWSLTRGGYEQYF;TRA:CALGDRGSNAKLTF
clone_1757_seq_2	H11_PD1_KO_clonotype635	1	TRB:CAWSLLDSRGEVFF;TRA:CALSDLTQGGRALIF
clone_1758_seq_2	H11_PD1_KO_clonotype636	1	TRB:CGSKGAETLYF;TRA:CAMRVTSGSWQLIF
clone_1759_seq_2	H11_PD1_KO_clonotype637	1	TRB:CARGQNSDYTF;TRB:CASGDPGQGDTQYF;TRA:CAASVRTGANTGKLTF
clone_1760_seq_2	H11_PD1_KO_clonotype638	1	TRB:CASSDRTANTEVFF;TRA:CALPIASSSFSKLVF
clone_1761_seq_2	H11_PD1_KO_clonotype639	1	TRB:CGARDISGNTEVFF;TRA:CALGRGSALGRLHF
clone_1762_seq_2	H11_PD1_KO_clonotype640	1	TRB:CASRGRNNQAPLF;TRB:CASSPGHPNTEVFF;TRA:CALGRGTGNTGKLIF
clone_1763_seq_2	H11_PD1_KO_clonotype641	1	TRB:CASSDGGNTEVFF;TRA:CAMREGRGSNNRIFF
clone_1764_seq_2	H11_PD1_KO_clonotype643	1	TRB:CASGPGGNTEVFF;TRA:CAASNNRIFF
clone_1765_seq_2	H11_PD1_KO_clonotype644	1	TRB:CASSQSGNTLYF;TRA:CALGPVYSGGSNAKLTF
clone_1766_seq_2	H11_PD1_KO_clonotype645	1	TRB:CARDWGINTGQLYF;TRB:CASGENWGGYAEQFF;TRA:CAGNMGYKLTF
clone_1767_seq_2	H11_PD1_KO_clonotype646	1	TRB:CASRQGWAETLYF;TRB:CSSRADSNQDTQYF;TRA:CAAGALDTNKVVF
clone_1768_seq_2	H11_PD1_KO_clonotype647	1	TRB:CASGEQNNQAPLF;TRA:CAASRNNNAPRF
clone_1769_seq_2	H11_PD1_KO_clonotype648	1	TRB:CASSDAGGSYEQYF;TRA:CAAGDQGGSAKLIF
clone_1770_seq_2	H11_PD1_KO_clonotype649	1	TRB:CASSQANQDTQYF;TRA:CAASASSGSWQLIF
clone_1771_seq_2	H11_PD1_KO_clonotype650	1	TRB:CAWSRGERAETLYF;TRA:CAAATSSGQKLVF
clone_1772_seq_2	H11_PD1_KO_clonotype651	1	TRB:CASRVHSGNTLYF;TRA:CAASDTEGADRLTF
clone_1773_seq_2	H11_PD1_KO_clonotype652	1	TRB:CASSDGWGDEQYF;TRA:CAASYTNAYKVIF
clone_1774_seq_2	H11_PD1_KO_clonotype653	1	TRB:CASSDGGQDTQYF;TRA:CAGNSGGSNAKLTF
clone_1775_seq_2	H11_PD1_KO_clonotype654	1	TRB:CASSAGGALEQYF;TRA:CAAGAGGGGNNKLTF
clone_1776_seq_2	H11_PD1_KO_clonotype655	1	TRB:CASATGSSAETLYF;TRA:CAASLGNNNAPRF
clone_1777_seq_2	H11_PD1_KO_clonotype656	1	TRB:CASSRDIYEQYF;TRA:CAASNQGGRALIF
clone_1778_seq_2	H11_PD1_KO_clonotype657	1	TRB:CGASGEISNERLFF;TRA:CAAISGGNYKPTF
clone_1779_seq_2	H11_PD1_KO_clonotype658	1	TRB:CGARGRVNQDTQYF;TRA:CAAKNYNQGKLIF
clone_1780_seq_2	H11_PD1_KO_clonotype659	1	TRB:CAWSLGGRWNEQYF;TRA:CAAVPNTGNYKYVF
clone_1781_seq_2	H11_PD1_KO_clonotype660	1	TRB:CASSDSGGKDTQYF;TRB:CASSLANERLFF;TRA:CAASGTSSSFSKLVF
clone_1782_seq_2	H11_PD1_KO_clonotype661	1	TRB:CASSRGANQNTLYF;TRA:CAASLMNYNQGKLIF
clone_1783_seq_2	H11_PD1_KO_clonotype663	1	TRB:CASSWGHYEQYF;TRA:CALSDGTGYQNFYF
clone_1784_seq_2	H11_PD1_KO_clonotype665	1	TRA:CAVSMISGTYQRF
clone_1785_seq_2	H11_PD1_KO_clonotype666	1	TRA:CAATTSNTNKVVF
clone_1786_seq_2	H11_PD1_KO_clonotype667	1	TRA:CAARGSALGRLHF
clone_1787_seq_2	H11_PD1_KO_clonotype668	1	TRA:CVLGDPNTGKLTF
clone_1788_seq_2	H11_PD1_KO_clonotype669	1	TRA:CAVSSAYKVIF
clone_1789_seq_2	H11_PD1_KO_clonotype670	1	TRA:CAASYAQGLTF
clone_1790_seq_2	H11_PD1_KO_clonotype671	1	TRB:CASSSQNYAEQFF
clone_1791_seq_2	H11_PD1_KO_clonotype672	1	TRB:CASSLLRENTLYF
clone_1792_seq_2	H11_PD1_KO_clonotype673	1	TRB:CASSLDSPDTLYF
clone_1793_seq_2	H11_PD1_KO_clonotype674	1	TRB:CASSLDSPDTLYF
clone_1794_seq_2	H11_PD1_KO_clonotype675	1	TRB:CASSLDRGNEQYF
clone_1795_seq_2	H11_PD1_KO_clonotype676	1	TRB:CASRAGGADTEVFF
clone_1796_seq_2	H11_PD1_KO_clonotype677	1	TRB:CASRAGGADTEVFF
clone_1797_seq_2	H11_PD1_KO_clonotype678	1	TRB:CASRAGGADTEVFF
clone_1798_seq_2	H11_PD1_KO_clonotype679	1	TRB:CASSRTVSNERLFF
clone_1799_seq_2	H11_PD1_KO_clonotype680	1	TRB:CASSQETGSYEQYF
clone_1800_seq_2	H11_PD1_KO_clonotype682	1	TRB:CASSQDWGGYEQYF
clone_1801_seq_2	H11_PD1_KO_clonotype683	1	TRB:CASSQEGGRNTLYF
clone_1802_seq_2	H11_PD1_KO_clonotype684	1	TRB:CASSQEGGAGEQYF
clone_1803_seq_2	H11_PD1_KO_clonotype685	1	TRB:CASSQEGGAGEQYF
clone_1804_seq_2	H11_PD1_KO_clonotype686	1	TRB:CASSHRDRGYEQYF
clone_1805_seq_2	H11_PD1_KO_clonotype687	1	TRB:CASSHRDRGYEQYF
clone_1806_seq_2	H11_PD1_KO_clonotype688	1	TRB:CASSHRDRGYEQYF
clone_1807_seq_2	H11_PD1_KO_clonotype689	1	TRB:CASSPGLGEDTQYF
clone_1808_seq_2	H11_PD1_KO_clonotype690	1	TRB:CASSPTGANTEVFF
clone_1809_seq_2	H11_PD1_KO_clonotype691	1	TRB:CASSPQANNQAPLF
clone_1810_seq_2	H11_PD1_KO_clonotype692	1	TRB:CASSRDINNQAPLF
clone_1811_seq_2	H11_PD1_KO_clonotype693	1	TRB:CASSRDINNQAPLF
clone_1812_seq_2	H11_PD1_KO_clonotype694	1	TRB:CASSRRDNSYEQYF
clone_1813_seq_2	H11_PD1_KO_clonotype695	1	TRB:CASRQGAGAETLYF
clone_1814_seq_2	H11_PD1_KO_clonotype696	1	TRA:CAAEDSGGSNAKLTF
clone_1815_seq_2	H11_PD1_KO_clonotype697	1	TRA:CAVSAGNYKYVF
clone_1816_seq_2	H11_PD1_KO_clonotype699	1	TRA:CAVSGTGGYKVVF
clone_1817_seq_2	H11_PD1_KO_clonotype700	1	TRB:CAWSLGGQGAETLYF
clone_1818_seq_2	H11_PD1_KO_clonotype701	1	TRB:CASSLDIQAPLF
clone_1819_seq_2	H11_PD1_KO_clonotype702	1	TRB:CASSGGSSYEQYF
clone_1820_seq_2	H11_PD1_KO_clonotype703	1	TRB:CASSLSQNTLYF
clone_1821_seq_2	H11_PD1_KO_clonotype704	1	TRB:CASSVGQYEQYF
clone_1822_seq_2	H11_PD1_KO_clonotype705	1	TRB:CASSSGGSEQYF
clone_1823_seq_2	H11_PD1_KO_clonotype706	1	TRB:CASSLTQWEQYF
clone_1824_seq_2	H11_PD1_KO_clonotype707	1	TRB:CASSLERYEQYF
clone_1825_seq_2	H11_PD1_KO_clonotype708	1	TRB:CASSLGRGEQYF
clone_1826_seq_2	H11_PD1_KO_clonotype709	1	TRB:CASSLGRGEQYF
clone_1827_seq_2	H11_PD1_KO_clonotype711	1	TRB:CASSLGRYEQYF
clone_1828_seq_2	H11_PD1_KO_clonotype712	1	TRB:CASSLGRYEQYF
clone_1829_seq_2	H11_PD1_KO_clonotype713	1	TRB:CASSPHRYEQYF
clone_1830_seq_2	H11_PD1_KO_clonotype714	1	TRB:CASSPQGYEQYF
clone_1831_seq_2	H11_PD1_KO_clonotype715	1	TRB:CASSRDRGEQYF
clone_1832_seq_2	H11_PD1_KO_clonotype716	1	TRB:CASSRNNQAPLF
clone_1833_seq_2	H11_PD1_KO_clonotype717	1	TRB:CASSTDTGQLYF
clone_1834_seq_2	H11_PD1_KO_clonotype718	1	TRB:CASSFGQATQYF
clone_1835_seq_2	H11_PD1_KO_clonotype719	1	TRB:CASSPGSYEQYF
clone_1836_seq_2	H11_PD1_KO_clonotype720	1	TRB:CASSGQKTNERLFF
clone_1837_seq_2	H11_PD1_KO_clonotype721	1	TRB:CASSPGQHTGQLYF
clone_1838_seq_2	H11_PD1_KO_clonotype722	1	TRB:CASSDWGGRTEQFF
clone_1839_seq_2	H11_PD1_KO_clonotype723	1	TRB:CASSDWGGVKTLYF
clone_1840_seq_2	H11_PD1_KO_clonotype724	1	TRB:CASSDRGANTEVFF
clone_1841_seq_2	H11_PD1_KO_clonotype725	1	TRB:CASSDPGRQDTQYF
clone_1842_seq_2	H11_PD1_KO_clonotype726	1	TRB:CASSALGNYAEQFF
clone_1843_seq_2	H11_PD1_KO_clonotype727	1	TRB:CASSVGQGSYEQYF
clone_1844_seq_2	H11_PD1_KO_clonotype728	1	TRB:CASGDTGNQDTQYF
clone_1845_seq_2	H11_PD1_KO_clonotype729	1	TRB:CASRQPGQGYAEQFF
clone_1846_seq_2	H11_PD1_KO_clonotype730	1	TRB:CASSTGLGGRGEQYF
clone_1847_seq_2	H11_PD1_KO_clonotype731	1	TRB:CASSDGQTSAETLYF
clone_1848_seq_2	H11_PD1_KO_clonotype732	1	TRB:CASSDGAGGHSDYTF
clone_1849_seq_2	H11_PD1_KO_clonotype733	1	TRB:CASSDVGTGPDTQYF
clone_1850_seq_2	H11_PD1_KO_clonotype734	1	TRB:CASSQEGNTEVFF
clone_1851_seq_2	H11_PD1_KO_clonotype736	1	TRB:CASSRFANTEVFF
clone_1852_seq_2	H11_PD1_KO_clonotype737	1	TRB:CASSPRTDTEVFF
clone_1853_seq_2	H11_PD1_KO_clonotype738	1	TRB:CASSLGGRDTQYF
clone_1854_seq_2	H11_PD1_KO_clonotype739	1	TRB:CASSDWGQNTLYF
clone_1855_seq_2	H11_PD1_KO_clonotype740	1	TRB:CASSSRWRDTLYF
clone_1856_seq_2	H11_PD1_KO_clonotype741	1	TRB:CSSSQDNQAPLF
clone_1857_seq_2	H11_PD1_KO_clonotype742	1	TRB:CSSRDRAYEQYF
clone_1858_seq_2	H11_PD1_KO_clonotype743	1	TRB:CTCSAESEQYF
clone_1859_seq_2	H11_PD1_KO_clonotype744	1	TRB:CTCSAGDTQYF
clone_1860_seq_2	H11_PD1_KO_clonotype746	1	TRB:CGARGGSLSGNTLYF
clone_1861_seq_2	H11_PD1_KO_clonotype747	1	TRB:CGASTGGYSGNTLYF
clone_1862_seq_2	H11_PD1_KO_clonotype748	1	TRB:CGARDHGAPNERLFF
clone_1863_seq_2	H11_PD1_KO_clonotype749	1	TRB:CGARDRDWNSYEQYF
clone_1864_seq_2	H11_PD1_KO_clonotype750	1	TRB:CGAIGTGGSQNTLYF
clone_1865_seq_2	H11_PD1_KO_clonotype751	1	TRB:CASGRQGEAETLYF;TRA:CATNNVLYF
clone_1866_seq_2	H11_PD1_KO_clonotype752	1	TRB:CASRAGGADTEVFF;TRA:CANSAGNKLTF
clone_1867_seq_2	H11_PD1_KO_clonotype753	1	TRB:CASSRDWGDAEQFF;TRB:CTCSADPGAEVFF;TRA:CILRVASAKLIF
clone_1868_seq_2	H11_PD1_KO_clonotype754	1	TRB:CASSLNRVEQYF;TRA:CAAGDYSNNRLTL;TRA:CIVTDYSNYQLIW
clone_1869_seq_2	H11_PD1_KO_clonotype755	1	TRB:CASSYWGGAEQFF;TRA:CAIDMGYKLTF
clone_1870_seq_2	H11_PD1_KO_clonotype758	1	TRB:CASSRDSYEQYF;TRA:CALEPNYNVLYF
clone_1871_seq_2	H11_PD1_KO_clonotype759	1	TRB:CASSDWDKGGNTLYF;TRA:CAAGSALGRLHF
clone_1872_seq_2	H11_PD1_KO_clonotype760	1	TRB:CASSQWANTGQLYF;TRA:CAADIPGSWQLIF
clone_1873_seq_2	H11_PD1_KO_clonotype761	1	TRB:CASSPPGGQDTQYF;TRA:CAAEPGGNYKPTF
clone_1874_seq_2	H11_PD1_KO_clonotype762	1	TRB:CASSLGRRSQNTLYF;TRB:CASSPWTGGYEQYF;TRA:CAAPRNNNNAPRF
clone_1875_seq_2	H11_PD1_KO_clonotype763	1	TRB:CAWSLGTGRSERLFF;TRA:CALELHNNNAPRF
clone_1876_seq_2	H11_PD1_KO_clonotype764	1	TRB:CASSSANTEVFF;TRA:CALPQGTGSKLSF;TRA:CVLGHQGGSAKLIF
clone_1877_seq_2	H11_PD1_KO_clonotype765	1	TRB:CASSLDRAEVFF;TRB:CTCSADPGLGGSYEQYF;TRA:CAAEGTNTGKLTF
clone_1878_seq_2	H11_PD1_KO_clonotype766	1	TRB:CASSGGQGSYEQYF;TRA:CAVNGSWQLIF
clone_1879_seq_2	H11_PD1_KO_clonotype767	1	TRB:CASSDAQGANSPLYF;TRA:CAAASSSFSKLVF
clone_1880_seq_2	H11_PD1_KO_clonotype768	1	TRB:CASSQEGVFEQYF;TRA:CAIDRNMGYKLTF
clone_1881_seq_2	H11_PD1_KO_clonotype769	1	TRB:CGASGTASSAETLYF;TRA:CILRAYQGGSAKLIF
clone_1882_seq_2	H11_PD1_KO_clonotype770	1	TRB:CASSQYNYAEQFF;TRA:CAASASSGSWQLIF;TRA:CALEPNTGYQNFYF
clone_1883_seq_2	H11_PD1_KO_clonotype771	1	TRB:CAAGTGSNERLFF;TRB:CASSLDSPDTLYF;TRA:CAAHTNAYKVIF;TRA:CAASMTNAYKVIF
clone_1884_seq_2	H11_PD1_KO_clonotype772	1	TRB:CASSQDWGENTLYF;TRA:CAFYSGGSNAKLTF
clone_1885_seq_2	H11_PD1_KO_clonotype773	1	TRB:CASSRGEETLYF;TRA:CAAGSSSSFSKLVF
clone_1886_seq_2	H11_PD1_KO_clonotype774	1	TRB:CASRLQNTEVFF;TRA:CAKSSNYNVLYF
clone_1887_seq_2	H11_PD1_KO_clonotype775	1	TRB:CASSPTATEVFF;TRA:CAIDGGDSNNRIFF
clone_1888_seq_2	H11_PD1_KO_clonotype776	1	TRB:CASSDRVGQNTLYF;TRB:CASSHRGREDNQAPLF;TRA:CAVSSGYNKLTF
clone_1889_seq_2	H11_PD1_KO_clonotype778	1	TRB:CASSDAAGGSYEQYF;TRA:CAVRGYAQGLTF
clone_1890_seq_2	H11_PD1_KO_clonotype780	1	TRB:CASKDWGGAEQYF;TRA:CAVMSNYNVLYF
clone_1891_seq_2	H11_PD1_KO_clonotype781	1	TRB:CASSFRDWAEQFF;TRA:CALEQSSGSWQLIF
clone_1892_seq_2	H11_PD1_KO_clonotype783	1	TRB:CTCSADNTLYF;TRA:CAAEALSNYNVLYF;TRA:CAMELGANTGKLTF
clone_1893_seq_2	H11_PD1_KO_clonotype784	1	TRB:CTCSGQSEVFF;TRA:CAPNYNQGKLIF
clone_1894_seq_2	H11_PD1_KO_clonotype785	1	TRB:CGARDTGQGQNTLYF;TRA:CAVTFYQGGRALIF;TRA:CVLCLGSWQLIF
clone_1895_seq_2	H11_PD1_KO_clonotype786	1	TRB:CASSGTGTGQLYF;TRA:CAVRDTNAYKVIF
clone_1896_seq_2	H11_PD1_KO_clonotype787	1	TRB:CASSLVWENYAEQFF;TRB:CASSPWTGIYEQYF;TRA:CAAEANQGGSAKLIF
clone_1897_seq_2	H11_PD1_KO_clonotype788	1	TRB:CAWRPGGANTGQLYF;TRA:CALRKGRALIF
clone_1898_seq_2	H11_PD1_KO_clonotype789	1	TRB:CAWSLCSHCTGQLYF;TRA:CILRVGGQQGTGSKLSF
clone_1899_seq_2	H11_PD1_KO_clonotype790	1	TRB:CASSLAWGQDTQYF;TRB:CASSNFYAEQFF;TRA:CAVSIRSNNRIFF
clone_1900_seq_2	H11_PD1_KO_clonotype791	1	TRB:CASSLGQYEQYF;TRA:CAVSMNSNNRIFF
clone_1901_seq_2	H11_PD1_KO_clonotype792	1	TRB:CASSLGGDEQYF;TRA:CAVSSGGNYKPTF
clone_1902_seq_2	H11_PD1_KO_clonotype793	1	TRB:CASSPGPYEQYF;TRA:CAAEATGANTGKLTF
clone_1903_seq_2	H11_PD1_KO_clonotype794	1	TRB:CASRWDSYEQYF;TRA:CAAEFQGGRALIF
clone_1904_seq_2	H11_PD1_KO_clonotype795	1	TRB:CASSYRGAEQFF;TRA:CAALSGGNYKPTF
clone_1905_seq_2	H11_PD1_KO_clonotype796	1	TRB:CASRGLGETLYF;TRA:CAAEPSNTGYQNFYF
clone_1906_seq_2	H11_PD1_KO_clonotype797	1	TRB:CASSLGTYEQYF;TRA:CVLSTNAYKVIF
clone_1907_seq_2	H11_PD1_KO_clonotype798	1	TRB:CASSDVRGETGQLYF;TRB:CASSLLGEEQYF;TRA:CAVRTQVVGQLTF
clone_1908_seq_2	H11_PD1_KO_clonotype799	1	TRB:CASSDVRGETGQLYF;TRB:CASSLLGEEQYF;TRA:CAASISGSWQLIF;TRA:CAVRTQVVGQLTF
clone_1909_seq_2	H11_PD1_KO_clonotype800	1	TRB:CASSFDNSDYTF;TRA:CAASTSAGNKLTF
clone_1910_seq_2	H11_PD1_KO_clonotype801	1	TRB:CASSESLVAETLYF;TRA:CALGSNNRIFF
clone_1911_seq_2	H11_PD1_KO_clonotype803	1	TRB:CASSDTGGGTGQLYF;TRA:CAVSGSALGRLHF
clone_1912_seq_2	H11_PD1_KO_clonotype804	1	TRB:CASSDTTGGQDTQYF;TRA:CATDETGGYKVVF
clone_1913_seq_2	H11_PD1_KO_clonotype805	1	TRB:CASSSGRNTEVFF;TRA:CALRNMGYKLTF;TRA:CALSDQGGRALIF
clone_1914_seq_2	H11_PD1_KO_clonotype806	1	TRB:CSSSQDNQAPLF;TRB:CTCSAGDTQYF;TRA:CAASFYQNFYF;TRA:CAASLANYGNEKITF
clone_1915_seq_2	H11_PD1_KO_clonotype807	1	TRB:CSSSQDNQAPLF;TRA:CAASFYQNFYF
clone_1916_seq_2	H11_PD1_KO_clonotype808	1	TRB:CTCSAEYEQYF;TRA:CALTLTNAYKVIF
clone_1917_seq_2	H11_PD1_KO_clonotype809	1	TRB:CASSRQGADTQYF;TRB:CASSWDWGAETLYF;TRA:CAASPTGNTGKLIF
clone_1918_seq_2	H11_PD1_KO_clonotype810	1	TRB:CASSLTGNSDYTF;TRB:CASSPDRDYAEQFF;TRA:CALDSGGSNAKLTF
clone_1919_seq_2	H11_PD1_KO_clonotype811	1	TRB:CASSFASQNTLYF;TRB:CASSPDWGGDTGQLYF;TRA:CAASEESGSFNKLTF;TRA:CVLGASGNTGKLIF
clone_1920_seq_2	H11_PD1_KO_clonotype812	1	TRB:CASSPHIISYEQYF;TRA:CVLSRNSNNRIFF
clone_1921_seq_2	H11_PD1_KO_clonotype814	1	TRB:CAWSSTGSNTGQLYF;TRA:CVLTTGGNNKLTF
clone_1922_seq_2	H11_PD1_KO_clonotype815	1	TRB:CASSQDRGEQYF;TRA:CAVSENSAGNKLTF
clone_1923_seq_2	H11_PD1_KO_clonotype816	1	TRB:CASSLRRNTLYF;TRA:CATDADTGYQNFYF
clone_1924_seq_2	H11_PD1_KO_clonotype817	1	TRB:CASSSGGQDTQYF;TRA:CALSAYNYAQGLTF
clone_1925_seq_2	H11_PD1_KO_clonotype818	1	TRB:CASSTGNTEVFF;TRA:CAANYGNEKITF
clone_1926_seq_2	H11_PD1_KO_clonotype819	1	TRB:CASSFGTYEQYF;TRA:CAASMNYNQGKLIF
clone_1927_seq_2	H11_PD1_KO_clonotype820	1	TRB:CASSQQGFEQYF;TRA:CVLCNSNTNKVVF
clone_1928_seq_2	H11_PD1_KO_clonotype821	1	TRB:CASSPGLGNYEQYF;TRB:CASSSTGNSDYTF;TRA:CALGSNSGTYQRF;TRA:CATDEPGSFNKLTF
clone_1929_seq_2	H11_PD1_KO_clonotype823	1	TRB:CASSGLTPNTEVFF;TRA:CAPTSNTNKVVF
clone_1930_seq_2	H11_PD1_KO_clonotype824	1	TRB:CASGEGTANSDYTF;TRA:CAASASSGSWQLIF
clone_1931_seq_2	H11_PD1_KO_clonotype825	1	TRB:CASGDRTGEYEQYF;TRA:CAGNSGYNKLTF
clone_1932_seq_2	H11_PD1_KO_clonotype826	1	TRB:CASSEWGGSGNTLYF;TRA:CAVSMKDYANKMIF
clone_1933_seq_2	H11_PD1_KO_clonotype827	1	TRB:CASSDGEISNERLFF;TRA:CAVRTANSGTYQRF
clone_1934_seq_2	H11_PD1_KO_clonotype828	1	TRB:CASSLMVGGLAEQFF;TRB:CASSQDNNQAPLF;TRA:CAASMDSNYQLIW;TRA:CAVSMKVSNNRIFF
clone_1935_seq_2	H11_PD1_KO_clonotype829	1	TRB:CASRGINQDTQYF;TRA:CAMSPYTGYQNFYF
clone_1936_seq_2	H11_PD1_KO_clonotype830	1	TRB:CGARAPGQGGYEQYF;TRA:CATGTGGYKVVF
clone_1937_seq_2	H11_PD1_KO_clonotype831	1	TRB:CASSRARNTEVFF;TRA:CALSDPGNYKYVF
clone_1938_seq_2	H11_PD1_KO_clonotype832	1	TRB:CASSWDRKNTLYF;TRA:CALSDRGTNYNVLYF
clone_1939_seq_2	H11_PD1_KO_clonotype833	1	TRB:CASSLYNYAEQFF;TRA:CAVSGDYGNEKITF
clone_1940_seq_2	H11_PD1_KO_clonotype834	1	TRB:CASSFGNYAEQFF;TRA:CALSEGGNEKITF
clone_1941_seq_2	H11_PD1_KO_clonotype836	1	TRB:CASSQDYSQNTLYF;TRA:CAVSKYNTNTGKLTF
clone_1942_seq_2	H11_PD1_KO_clonotype837	1	TRB:CASSQAGDAETLYF;TRA:CAPTASLGKLQF
clone_1943_seq_2	H11_PD1_KO_clonotype838	1	TRB:CASSQGGGSYEQYF;TRA:CARNTGYQNFYF
clone_1944_seq_2	H11_PD1_KO_clonotype839	1	TRB:CASSPRSNQDTQYF;TRA:CAVSTSGGNYKPTF
clone_1945_seq_2	H11_PD1_KO_clonotype840	1	TRB:CASSPSGGGDTQYF;TRA:CAVSAGGSNAKLTF
clone_1946_seq_2	H11_PD1_KO_clonotype841	1	TRB:CASSRTRGYTEVFF;TRA:CAVSLTNAYKVIF
clone_1947_seq_2	H11_PD1_KO_clonotype842	1	TRB:CASSSDWGEQYF;TRA:CAAKSSGSWQLIF
clone_1948_seq_2	H11_PD1_KO_clonotype844	1	TRB:CASSRERGGEQYF;TRA:CAVSADTNAYKVIF
clone_1949_seq_2	H11_PD1_KO_clonotype845	1	TRB:CASGQGQRDTQYF;TRA:CAASSRGNYQLIW
clone_1950_seq_2	H11_PD1_KO_clonotype846	1	TRB:CASSSTGGEQYF;TRA:CALMDSNYQLIW
clone_1951_seq_2	H11_PD1_KO_clonotype847	1	TRB:CASSLGDNYEQYF;TRB:CASSRDKYEQYF;TRA:CAVSSSNMGYKLTF
clone_1952_seq_2	H11_PD1_KO_clonotype848	1	TRB:CASSLLVHEQYF;TRB:CASSSGTNNYAEQFF;TRA:CVLSFTGSGGKLTL
clone_1953_seq_2	H11_PD1_KO_clonotype849	1	TRB:CASSLVQNTLYF;TRA:CVLSPSSGSWQLIF
clone_1954_seq_2	H11_PD1_KO_clonotype850	1	TRB:CASSTGTVEQYF;TRA:CALSMSTNTGKLTF
clone_1955_seq_2	H11_PD1_KO_clonotype851	1	TRB:CASRFNQDTQYF;TRA:CVLSAGGSNAKLTF
clone_1956_seq_2	H11_PD1_KO_clonotype852	1	TRB:CASSGDITEVFF;TRA:CALSQGTGSKLSF
clone_1957_seq_2	H11_PD1_KO_clonotype853	1	TRB:CASSSGGDTQYF;TRA:CAVRYSGYNKLTF
clone_1958_seq_2	H11_PD1_KO_clonotype854	1	TRB:CASSEWGRGNTLYF;TRA:CAVSYSGGSNAKLTF
clone_1959_seq_2	H11_PD1_KO_clonotype855	1	TRB:CASSDHRGHERLFF;TRA:CVLGRGSALGRLHF
clone_1960_seq_2	H11_PD1_KO_clonotype856	1	TRB:CASSGDSNQDTQYF;TRA:CAASNTNTGKLTF
clone_1961_seq_2	H11_PD1_KO_clonotype857	1	TRB:CASSQDPLPEQFF;TRA:CVLSAWSNTNKVVF
clone_1962_seq_2	H11_PD1_KO_clonotype858	1	TRB:CASSPQENTEVFF;TRA:CAASTGNTGKLIF
clone_1963_seq_2	H11_PD1_KO_clonotype859	1	TRB:CASSRDWGREQYF;TRA:CAVRDSGYNKLTF
clone_1964_seq_2	H11_PD1_KO_clonotype860	1	TRB:CAVRLGVYAEQFF;TRA:CILRVAAGVQQGTGSKLSF
clone_1965_seq_2	H11_PD1_KO_clonotype862	1	TRB:CGARDWGANYAEQFF;TRA:CALSESGNEKITF
clone_1966_seq_2	H11_PD1_KO_clonotype863	1	TRB:CASGGDWGGYEQYF;TRB:CGARDHGAPNERLFF;TRA:CALSAGSGGKLTL;TRA:CAVSAWATGGNNKLTF
clone_1967_seq_2	H11_PD1_KO_clonotype864	1	TRB:CASSPGGRDTQYF;TRA:CALEAPQGGSAKLIF
clone_1968_seq_2	H11_PD1_KO_clonotype865	1	TRB:CASSPDWGGYEQYF;TRB:CASSQDRANERLFF;TRA:CAATASSSFSKLVF
clone_1969_seq_2	H11_PD1_KO_clonotype866	1	TRB:CASSLGVSYNSPLYF;TRB:CASSQDQGGNTLYF;TRA:CAVSADTNTGKLTF
clone_1970_seq_2	H11_PD1_KO_clonotype867	1	TRB:CASSLGQNTEVFF;TRB:CASSQDWGRYEQYF;TRA:CAAAPGTGYQNFYF;TRA:CAASRAGNTGKLIF
clone_1971_seq_2	H11_PD1_KO_clonotype868	1	TRB:CASSQGTGNQAPLF;TRA:CAVGPMSNYNVLYF
clone_1972_seq_2	H11_PD1_KO_clonotype869	1	TRB:CASSQTDSAETLYF;TRA:CALGGDNYAQGLTF
clone_1973_seq_2	H11_PD1_KO_clonotype870	1	TRB:CAWSLDRGVNQAPLF;TRA:CALSSNMGYKLTF
clone_1974_seq_2	H11_PD1_KO_clonotype871	1	TRB:CASSPSSYEQYF;TRA:CALSAQGTGSKLSF
clone_1975_seq_2	H11_PD1_KO_clonotype872	1	TRB:CASRRDWGGEQYF;TRA:CAAGPSSNTNKVVF
clone_1976_seq_2	H11_PD1_KO_clonotype873	1	TRB:CASSTRANTEVFF;TRA:CALSLNTGGLSGKLTF
clone_1977_seq_2	H11_PD1_KO_clonotype874	1	TRB:CASSLGYSDYTF;TRA:CAAMATGGNNKLTF
clone_1978_seq_2	H11_PD1_KO_clonotype875	1	TRB:CASRAGDNYAEQFF;TRA:CAVSAWDSNYQLIW
clone_1979_seq_2	H11_PD1_KO_clonotype876	1	TRB:CASRGLGSQNTLYF;TRA:CAASYNYNQGKLIF
clone_1980_seq_2	H11_PD1_KO_clonotype877	1	TRB:CASSLTGTENTLYF;TRA:CAVSAMPNTGKLTF
clone_1981_seq_2	H11_PD1_KO_clonotype878	1	TRB:CASSDSGLSQNTLYF;TRA:CALSASAGNKLTF
clone_1982_seq_2	H11_PD1_KO_clonotype879	1	TRB:CASSYRGNTEVFF;TRA:CALTQGDSNYQLIW
clone_1983_seq_2	H11_PD1_KO_clonotype880	1	TRB:CASSLERGKNTEVFF;TRB:CASSSTGRDTQYF;TRA:CALGTQVVGQLTF
clone_1984_seq_2	H11_PD1_KO_clonotype881	1	TRB:CASRGQTNTEVFF;TRA:CAMREGGLSGSFNKLTF;TRA:CVVGDRGSALGRLHF
clone_1985_seq_2	H11_PD1_KO_clonotype882	1	TRB:CASRDGANERLFF;TRA:CVVGDRGSALGRLHF
clone_1986_seq_2	H11_PD1_KO_clonotype883	1	TRB:CASGTGGSAEQFF;TRA:CALGEGNNAGAKLTF;TRA:CAMREGANSGTYQRF
clone_1987_seq_2	H11_PD1_KO_clonotype884	1	TRB:CASSQEGGSYEQYF;TRA:CAASRDQGGSAKLIF
clone_1988_seq_2	H11_PD1_KO_clonotype885	1	TRB:CAWRFTGGNNQAPLF;TRA:CAASPYNTNTGKLTF
clone_1989_seq_2	H11_PD1_KO_clonotype886	1	TRB:CASSRQGGTLYF;TRA:CAASAGAGDNSKLIW;TRA:CAASMDYANKMIF
clone_1990_seq_2	H11_PD1_KO_clonotype887	1	TRB:CASSWEGNTLYF;TRA:CAASVAGANTGKLTF
clone_1991_seq_2	H11_PD1_KO_clonotype888	1	TRB:CASSLEGGEQYF;TRA:CAYVNNNAGAKLTF
clone_1992_seq_2	H11_PD1_KO_clonotype889	1	TRB:CASSLDRGEVFF;TRA:CALGDRSNNRIFF
clone_1993_seq_2	H11_PD1_KO_clonotype890	1	TRB:CASSEQGWAETLYF;TRA:CALAATGGNNKLTF
clone_1994_seq_2	H11_PD1_KO_clonotype891	1	TRB:CASSDRGYQDTQYF;TRA:CALRVSGSFNKLTF
clone_1995_seq_2	H11_PD1_KO_clonotype892	1	TRB:CASSDWASQNTLYF;TRA:CAMRDNYAQGLTF
clone_1996_seq_2	H11_PD1_KO_clonotype893	1	TRB:CASSDTGGNYEQYF;TRB:CTCSAEGQGKNTLYF;TRA:CALWELPMSNYNVLYF;TRA:CAPLPTSSGQKLVF
clone_1997_seq_2	H11_PD1_KO_clonotype894	1	TRB:CASGTRLGVNTLYF;TRA:CVVGDRGSALGRLHF
clone_1998_seq_2	H11_PD1_KO_clonotype895	1	TRB:CASSDAQGVNTEVFF;TRA:CALSGNQGGRALIF
clone_1999_seq_2	H11_PD1_KO_clonotype896	1	TRB:CASSQGAGNTLYF;TRA:CAASSQNYNQGKLIF
[truncated: 91 more rows]

## Sheet: PD1KO2
Tcell_clone_rank	clonotype_id	count	cdr3s_aa
clone_1_seq_2	H11_PD1_KO_clonotype1	506	TRB:CASGDQNRGRAPLF;TRB:CTCSAGLGGSYEQYF;TRA:CALSIASSGSWQLIF
clone_2_seq_2	H11_PD1_KO_clonotype2	265	TRB:CASRTANSDYTF;TRA:CALSGASGSWQLIF
clone_3_seq_2	H11_PD1_KO_clonotype3	219	TRB:CASSRPGASAETLYF;TRB:CASSRPGQSAETLYF;TRA:CAAEAWTNYNVLYF;TRA:CVLSEYSGTYQRF
clone_4_seq_2	H11_PD1_KO_clonotype4	114	TRB:CASSLSSGVTEVFF;TRA:CAVNGTGGYKVVF;TRA:CAVSPNTNTGKLTF
clone_5_seq_2	H11_PD1_KO_clonotype5	108	TRB:CASSASGRSAETLYF;TRA:CAAEAMSNYNVLYF;TRA:CAALSNYNVLYF
clone_6_seq_2	H11_PD1_KO_clonotype6	99	TRB:CASGDQNRGRAPLF;TRB:CASGVGPGTGGFHTEVFF;TRA:CALSEGYGSSGNKLIF
clone_7_seq_2	H11_PD1_KO_clonotype8	92	TRB:CTCSAGLGGSYEQYF;TRB:CTCSAHRGEQYF;TRA:CAARGYQGGSAKLIF
clone_8_seq_2	H11_PD1_KO_clonotype7	88	TRB:CASSLEDRSSYEQYF;TRA:CAVSPYGSSGNKLIF
clone_9_seq_2	H11_PD1_KO_clonotype9	74	TRB:CASSLTGGAANERLFF;TRA:CALEQAGYQNFYF;TRA:CAMREGDAGNTGKLIF
clone_10_seq_2	H11_PD1_KO_clonotype10	71	TRB:CASGDGGNQAPLF;TRB:CASGDQNRGRAPLF;TRA:CAGNSNNRIFF
clone_11_seq_2	H11_PD1_KO_clonotype11	59	TRB:CASRANTEVFF;TRA:CAMREGDITGNTGKLIF
clone_12_seq_2	H11_PD1_KO_clonotype13	51	TRB:CASSSGTIYEQYF;TRA:CALGGNQGGSAKLIF;TRA:CAMRARNNNNAPRF
clone_13_seq_2	H11_PD1_KO_clonotype14	50	TRB:CASSQDKGLGFQDTQYF;TRB:CASSRPGQSAETLYF;TRB:CASSRPGQSAETLYF;TRA:CAAEMMSNYNVLYF
clone_14_seq_2	H11_PD1_KO_clonotype15	43	TRB:CASSLQGDSDYTF;TRA:CALVRSSGSWQLIF;TRA:CAVTGTGGYKVVF
clone_15_seq_2	H11_PD1_KO_clonotype16	42	TRB:CASSHPGLGGYEQYF;TRA:CAASGYDTNAYKVIF
clone_16_seq_2	H11_PD1_KO_clonotype17	35	TRB:CASSFGRRNTEVFF;TRA:CAVSMTGSGGKLTL
clone_17_seq_2	H11_PD1_KO_clonotype12	29	TRB:CASSLTGGAREQYF;TRA:CAVSSRNNYAQGLTF
clone_18_seq_2	H11_PD1_KO_clonotype18	29	TRB:CASSLLVHEQYF;TRB:CASSSGTNNYAEQFF;TRA:CVLSFTGSGGKLTL
clone_19_seq_2	H11_PD1_KO_clonotype20	29	TRB:CASSLDSQPSDYTF;TRA:CAASAQDTNAYKVIF
clone_20_seq_2	H11_PD1_KO_clonotype19	26	TRB:CASSGTVVFF;TRA:CAAENYGNEKITF
clone_21_seq_2	H11_PD1_KO_clonotype21	25	TRB:CASRANTEVFF;TRB:CASRGQGAREVFF;TRA:CALKSSSSFSKLVF
clone_22_seq_2	H11_PD1_KO_clonotype22	24	TRB:CASSKGGMDSDYTF;TRA:CAAEAPGNYKYVF
clone_23_seq_2	H11_PD1_KO_clonotype23	24	TRB:CTCSAGLGGSYEQYF;TRB:CTCSDRGQNQAPLF;TRA:CAAASSGSWQLIF
clone_24_seq_2	H11_PD1_KO_clonotype24	22	TRB:CTCSADGGRNTEVFF;TRB:CTCSAGLGGSYEQYF;TRA:CALRSGGSNAKLTF
clone_25_seq_2	H11_PD1_KO_clonotype25	21	TRB:CASSIETGGGAETLYF;TRA:CVLGGMSNYNVLYF
clone_26_seq_2	H11_PD1_KO_clonotype26	18	TRB:CASSIGTGGTETLYF;TRA:CALSPANYNVLYF;TRA:CALSVGGGLSGKLTF
clone_27_seq_2	H11_PD1_KO_clonotype27	18	TRB:CASTPGTLYAEQFF;TRA:CAMREGHTNAYKVIF
clone_28_seq_2	H11_PD1_KO_clonotype30	18	TRB:CASSPWGGGAEQYF;TRA:CALGDLRYGSSGNKLIF;TRA:CALRYNQGKLIF
clone_29_seq_2	H11_PD1_KO_clonotype28	16	TRB:CASRANTEVFF;TRA:CAMREGDITGNTGKLIF
clone_30_seq_2	H11_PD1_KO_clonotype29	16	TRB:CASSDAAETLYF;TRA:CAAMATGGNNKLTF
clone_31_seq_2	H11_PD1_KO_clonotype35	14	TRB:CASSFRTGGEQYF;TRA:CAAYNTNTGKLTF
clone_32_seq_2	H11_PD1_KO_clonotype37	14	TRB:CASSIRGTGAYEQYF;TRB:CASSLDGYEQYF;TRA:CALSRGMGYKLTF;TRA:CAVSVGMGYKLTF
clone_33_seq_2	H11_PD1_KO_clonotype31	13	TRB:CTCSAGLGGSYEQYF
clone_34_seq_2	H11_PD1_KO_clonotype33	13	TRB:CASSLTGGAREQYF;TRB:CASSPGQGAGNTLYF;TRA:CVLGDITGNTGKLIF
clone_35_seq_2	H11_PD1_KO_clonotype36	13	TRB:CASSLTGGNYAEQFF;TRA:CAVRVMATGGNNKLTF
clone_36_seq_2	H11_PD1_KO_clonotype38	13	TRB:CASSRDWGGGAETLYF;TRB:CASTPGTLYAEQFF;TRA:CATSGSFNKLTF
clone_37_seq_2	H11_PD1_KO_clonotype40	12	TRB:CASSDRQGAGQLYF;TRA:CAVSMAGGYKVVF
clone_38_seq_2	H11_PD1_KO_clonotype32	11	TRB:CASGDGWDSQNTLYF;TRB:CASGDQNRGRAPLF;TRA:CAIDTNTGKLTF
clone_39_seq_2	H11_PD1_KO_clonotype42	11	TRB:CASPGQGYEQYF;TRB:CASSQDGRTGKGEVFF;TRA:CAASRANNNAPRF
clone_40_seq_2	H11_PD1_KO_clonotype39	10	TRB:CASRDSAETLYF;TRA:CAVEGQGGSAKLIF
clone_41_seq_2	H11_PD1_KO_clonotype43	10	TRB:CASSLSSGVTEVFF;TRA:CAVSANTNTGKLTF
clone_42_seq_2	H11_PD1_KO_clonotype34	9	TRB:CASRANTEVFF
clone_43_seq_2	H11_PD1_KO_clonotype41	9	TRB:CASGDQNRGRAPLF
clone_44_seq_2	H11_PD1_KO_clonotype45	9	TRB:CASSQEGRTGGPEQYF;TRA:CAASTHNNNAPRF
clone_45_seq_2	H11_PD1_KO_clonotype44	8	TRB:CASSQEGKNTGQLYF;TRA:CAMRSITGNTGKLIF
clone_46_seq_2	H11_PD1_KO_clonotype48	8	TRB:CASSQPGQSAETLYF;TRA:CAAEKMSNYNVLYF
clone_47_seq_2	H11_PD1_KO_clonotype51	8	TRB:CASSPAGTGVAEQFF;TRB:CASTPGTLYAEQFF;TRA:CALGGSYQLIW
clone_48_seq_2	H11_PD1_KO_clonotype52	8	TRB:CASGDQNRGRAPLF;TRB:CASGDRGTEVFF;TRA:CALSDPSNYNVLYF
clone_49_seq_2	H11_PD1_KO_clonotype46	7	TRB:CASSPQGAEQYF;TRA:CAVNSAGNKLTF
clone_50_seq_2	H11_PD1_KO_clonotype47	7	TRB:CASSDGRGQNTLYF;TRA:CAMRGGYNQGKLIF
clone_51_seq_2	H11_PD1_KO_clonotype49	7	TRB:CASSFTGNYAEQFF;TRA:CATDPNSGTYQRF
clone_52_seq_2	H11_PD1_KO_clonotype53	7	TRB:CASSIRGTGAYEQYF;TRB:CASSLDGYEQYF;TRA:CALSRGMGYKLTF;TRA:CAVSVGMGYKLTF
clone_53_seq_2	H11_PD1_KO_clonotype54	7	TRB:CASRQGANTLYF;TRA:CAMSPNTGYQNFYF
clone_54_seq_2	H11_PD1_KO_clonotype55	7	TRB:CASSPPWGGYEQYF;TRA:CALEHTNAYKVIF;TRA:CATDSNYQLIW
clone_55_seq_2	H11_PD1_KO_clonotype56	7	TRB:CAWSLSTGGASAETLYF;TRA:CAMREWGYNQGKLIF;TRA:CAMREWGYNQGKLIF;TRA:CAPLAQGLTF
clone_56_seq_2	H11_PD1_KO_clonotype58	7	TRB:CASSLGTGVNYAEQFF;TRA:CALKNSGTYQRF
clone_57_seq_2	H11_PD1_KO_clonotype50	6	TRB:CASSASGRSAETLYF;TRB:CASSLGQTNTGQLYF;TRA:CAASVTNAYKVIF
clone_58_seq_2	H11_PD1_KO_clonotype61	6	TRB:CASSDNYAEQFF;TRB:CASSSTISGNTLYF;TRA:CAAIPDQGGRALIF
clone_59_seq_2	H11_PD1_KO_clonotype63	6	TRB:CASSLLVSQNTLYF;TRA:CAASKDNYAQGLTF
clone_60_seq_2	H11_PD1_KO_clonotype64	6	TRB:CASSLDRRGSDYTF;TRA:CAASAYDTNAYKVIF;TRA:CVFTEGADRLTF
clone_61_seq_2	H11_PD1_KO_clonotype66	6	TRB:CASGGTGAYEQYF;TRA:CALSGGSGGSNYKLTF
clone_62_seq_2	H11_PD1_KO_clonotype57	5	TRB:CASSASGRSAETLYF;TRB:CASSHPGGIAETLYF;TRA:CAAEAFSNYNVLYF
clone_63_seq_2	H11_PD1_KO_clonotype59	5	TRB:CASRDSAETLYF;TRA:CAVEGQGGSAKLIF
clone_64_seq_2	H11_PD1_KO_clonotype60	5	TRB:CGAREKGYEQYF;TRA:CAASWYNVLYF;TRA:CALKNSGTYQRF;TRA:CALSDLGAGNKLTF
clone_65_seq_2	H11_PD1_KO_clonotype62	5	TRB:CASSLQTSGNTLYF;TRA:CAMRGNTGANTGKLTF;TRA:CAVFYGNEKITF
clone_66_seq_2	H11_PD1_KO_clonotype65	5	TRB:CASSIAGGRAAETLYF;TRA:CAVSGAGGYKVVF
clone_67_seq_2	H11_PD1_KO_clonotype67	5	TRB:CASSPFKISNERLFF;TRB:CASSPGQI;TRA:CAAYTGANTGKLTF
clone_68_seq_2	H11_PD1_KO_clonotype68	5	TRB:CASSDQGAGNTLYF;TRA:CAASLGNAGAKLTF
clone_69_seq_2	H11_PD1_KO_clonotype69	5	TRB:CGAKNWGGEDTQYF;TRA:CALPNVGDNSKLIW
clone_70_seq_2	H11_PD1_KO_clonotype73	5	TRB:CASSGRQGGAETLYF;TRA:CAASEETGNTGKLIF
clone_71_seq_2	H11_PD1_KO_clonotype71	4	TRB:CASSLDSAETLYF;TRA:CAASLDYANKMIF;TRA:CAVSAKGYQNFYF
clone_72_seq_2	H11_PD1_KO_clonotype72	4	TRB:CASGEPNSGNTLYF;TRA:CAASWHNNNAPRF
clone_73_seq_2	H11_PD1_KO_clonotype74	4	TRB:CASRDNYAEQFF;TRA:CAVSPRGSALGRLHF
clone_74_seq_2	H11_PD1_KO_clonotype75	4	TRB:CAWSRTGGFSPLYF;TRA:CALSDSLGYNQGKLIF
clone_75_seq_2	H11_PD1_KO_clonotype77	4	TRB:CASSSGTLNTLYF;TRA:CAAAHSAGNKLTF
clone_76_seq_2	H11_PD1_KO_clonotype78	4	TRB:CASSLTGGQLYF;TRA:CAASPNYGNEKITF;TRA:CALSVNTGYQNFYF
clone_77_seq_2	H11_PD1_KO_clonotype79	4	TRB:CASSGTGGAGSDYTF;TRA:CAVSRGNYAQGLTF
clone_78_seq_2	H11_PD1_KO_clonotype80	4	TRB:CASSQELGSAETLYF;TRA:CALSEGAGYQNFYF
clone_79_seq_2	H11_PD1_KO_clonotype83	4	TRB:CASSLQGRNTEVFF;TRA:CAARTSSFSKLVF
clone_80_seq_2	H11_PD1_KO_clonotype86	4	TRB:CTCSAAQGNERLFF;TRB:CTCSAGLGGSYEQYF;TRA:CAAREGADRLTF
clone_81_seq_2	H11_PD1_KO_clonotype87	4	TRB:CASSLARGPNTEVFF;TRA:CAASAVDTNAYKVIF
clone_82_seq_2	H11_PD1_KO_clonotype88	4	TRB:CTCSAAGTGGYEQYF;TRA:CALSDNYAQGLTF
clone_83_seq_2	H11_PD1_KO_clonotype89	4	TRB:CASSLGAGGLSYEQYF;TRA:CALSPNTNTGKLTF
clone_84_seq_2	H11_PD1_KO_clonotype91	4	TRB:CASGDQGGNYAEQFF;TRA:CAVRIMATGGNNKLTF
clone_85_seq_2	H11_PD1_KO_clonotype100	3	TRB:CASSDAGGNYAEQFF;TRA:CAVRRMATGGNNKLTF
clone_86_seq_2	H11_PD1_KO_clonotype101	3	TRB:CASSDVGLGGDTQYF;TRB:CASSRDSSYEQYF;TRA:CAAGDSNYQLIW
clone_87_seq_2	H11_PD1_KO_clonotype102	3	TRB:CASSLIRYEQYF;TRB:CTCSAGLGGSYEQYF;TRA:CAAEANTNKVVF
clone_88_seq_2	H11_PD1_KO_clonotype103	3	TRB:CASSPWTGAYEQYF;TRA:CAASGGSNYKLTF
clone_89_seq_2	H11_PD1_KO_clonotype104	3	TRB:CASSRDNQAPLF;TRA:CAVSAYYNQGKLIF
clone_90_seq_2	H11_PD1_KO_clonotype105	3	TRB:CASSAGLYAEQFF;TRA:CALSEGMQQGTGSKLSF
clone_91_seq_2	H11_PD1_KO_clonotype106	3	TRB:CASSLAVYEQYF;TRA:CAMREWGTGNYKYVF
clone_92_seq_2	H11_PD1_KO_clonotype107	3	TRB:CASSDLGVRAEQFF;TRA:CAASDRGSALGRLHF
clone_93_seq_2	H11_PD1_KO_clonotype108	3	TRB:CASSQDDRANQAPLF;TRA:CILRVSNTGYQNFYF
clone_94_seq_2	H11_PD1_KO_clonotype109	3	TRB:CASSLGLDYEQYF;TRA:CALTPNAGAKLTF;TRA:CAVDYANKMIF
clone_95_seq_2	H11_PD1_KO_clonotype110	3	TRB:CASSFGGQNTLYF;TRA:CAASEITGANTGKLTF
clone_96_seq_2	H11_PD1_KO_clonotype111	3	TRB:CASSQDGGSAETLYF;TRA:CALSGHYGSSGNKLIF
clone_97_seq_2	H11_PD1_KO_clonotype112	3	TRB:CASSQAGTGNERLFF;TRA:CAAMKNYGSSGNKLIF
clone_98_seq_2	H11_PD1_KO_clonotype113	3	TRB:CASSRLGGEYEQYF;TRA:CAIEKSSNTNKVVF
clone_99_seq_2	H11_PD1_KO_clonotype114	3	TRB:CASSLGGTSAETLYF;TRA:CAAEAFSNYNVLYF;TRA:CAVRDNTNTGKLTF
clone_100_seq_2	H11_PD1_KO_clonotype115	3	TRB:CASSLGGRGAETLYF;TRA:CAAEKYSNYNVLYF
clone_101_seq_2	H11_PD1_KO_clonotype116	3	TRB:CASSQEGRTNTGQLYF;TRA:CAVSAHNNNAPRF
clone_102_seq_2	H11_PD1_KO_clonotype117	3	TRB:CASSFWGGNTGQLYF;TRA:CALSAFTGSGGKLTL
clone_103_seq_2	H11_PD1_KO_clonotype118	3	TRB:CASSLMGQYAEQFF;TRA:CALSAQGGRALIF
clone_104_seq_2	H11_PD1_KO_clonotype119	3	TRB:CASSQGNSGNTLYF;TRA:CALSDRTGSGGKLTL
clone_105_seq_2	H11_PD1_KO_clonotype120	3	TRB:CASGDRGTEVFF;TRB:CASSIQGAYEQYF;TRA:CAVISGSWQLIF
clone_106_seq_2	H11_PD1_KO_clonotype122	3	TRB:CTCSADAGLVAEQFF;TRB:CTCSAGLGGSYEQYF;TRA:CALRTGGSNAKLTF
clone_107_seq_2	H11_PD1_KO_clonotype123	3	TRB:CASSIGTDSQNTLYF;TRA:CALVANNRIFF
clone_108_seq_2	H11_PD1_KO_clonotype124	3	TRB:CASSRDWVGAETLYF;TRA:CAASMRDSGTYQRF;TRA:CAVSAHMGYKLTF
clone_109_seq_2	H11_PD1_KO_clonotype125	3	TRB:CASSLSSGGAIAETLYF;TRA:CAMREWGSAGNKLTF
clone_110_seq_2	H11_PD1_KO_clonotype126	3	TRB:CASSLGNSGNTLYF;TRA:CAAGGGDTGYQNFYF;TRA:CALGDHNNAPRF
clone_111_seq_2	H11_PD1_KO_clonotype127	3	TRB:CASSLRRSDYTF;TRA:CANTNTGKLTF
clone_112_seq_2	H11_PD1_KO_clonotype128	3	TRB:CASSPGNERLFF;TRA:CALSPNVGDNSKLIW
clone_113_seq_2	H11_PD1_KO_clonotype129	3	TRB:CASGEGGAPDTQYF;TRA:CAASETGGNNKLTF
clone_114_seq_2	H11_PD1_KO_clonotype130	3	TRB:CASGDAYNANSDYTF;TRA:CALTHTNTGKLTF
clone_115_seq_2	H11_PD1_KO_clonotype131	3	TRB:CASSLEGPRTYEQYF;TRA:CALQGTGSKLSF
clone_116_seq_2	H11_PD1_KO_clonotype132	3	TRB:CASSRNRGGDQDTQYF;TRA:CAATGGYKVVF;TRA:CAMPRGSALGRLHF
clone_117_seq_2	H11_PD1_KO_clonotype70	3	TRB:CATTGGYEQYF;TRA:CAVSIQGGRALIF
clone_118_seq_2	H11_PD1_KO_clonotype76	3	TRB:CASSQEDPNTEVFF;TRA:CAVSAGNNAGAKLTF;TRA:CILRVNYNQGKLIF
clone_119_seq_2	H11_PD1_KO_clonotype81	3	TRB:CASSLVSSGNTLYF;TRA:CALSGSYSGGSNYKLTF
clone_120_seq_2	H11_PD1_KO_clonotype82	3	TRB:CASSRPGASAETLYF
clone_121_seq_2	H11_PD1_KO_clonotype84	3	TRB:CASSLDSQPSDYTF;TRB:CASSLTGYGNTLYF;TRA:CAMRENTGYQNFYF
clone_122_seq_2	H11_PD1_KO_clonotype90	3	TRB:CASGVGPGTGGFHTEVFF;TRA:CALSEGYGSSGNKLIF
clone_123_seq_2	H11_PD1_KO_clonotype92	3	TRB:CASSNREQYF;TRA:CAIDRYAGYQNFYF;TRA:CVLSGMDYANKMIF
clone_124_seq_2	H11_PD1_KO_clonotype93	3	TRB:CASRGGNYAEQFF;TRA:CALGRATGGNNKLTF
clone_125_seq_2	H11_PD1_KO_clonotype94	3	TRB:CASSGGQNSDYTF;TRA:CALGDLGYKLTF;TRA:CATAGTGGYKVVF
clone_126_seq_2	H11_PD1_KO_clonotype95	3	TRB:CASRREDQDTQYF;TRA:CAVKDYNQGKLIF
clone_127_seq_2	H11_PD1_KO_clonotype96	3	TRB:CASWTNTEVFF;TRA:CAVRSPIHNVLYF
clone_128_seq_2	H11_PD1_KO_clonotype97	3	TRB:CASSRNNYEQYF;TRA:CAASAFNSNNRIFF;TRA:CAPNNAGAKLTF
clone_129_seq_2	H11_PD1_KO_clonotype98	3	TRB:CASSDGRGQNTLYF;TRA:CAMRGGYNQGKLIF
clone_130_seq_2	H11_PD1_KO_clonotype99	3	TRB:CASSGDEQYF;TRA:CAVKGGRALIF
clone_131_seq_2	H11_PD1_KO_clonotype121	2	TRB:CASSLDWGRSQNTLYF;TRA:CALYNTNTGKLTF
clone_132_seq_2	H11_PD1_KO_clonotype133	2	TRB:CASRTGNTLYF;TRA:CAVSPDTNAYKVIF
clone_133_seq_2	H11_PD1_KO_clonotype134	2	TRB:CASSLTGGAANERLFF;TRB:CASSSDTQYF;TRA:CATGTSSGQKLVF
clone_134_seq_2	H11_PD1_KO_clonotype137	2	TRB:CASSFIYEQYF;TRA:CAVWSSGSWQLIF
clone_135_seq_2	H11_PD1_KO_clonotype138	2	TRB:CASSDWGQDTQYF;TRA:CVLKGRGSALGRLHF
clone_136_seq_2	H11_PD1_KO_clonotype139	2	TRB:CGARVGNYAEQFF;TRA:CAMREPSYTGANTGKLTF;TRA:CVLGGMSNYNVLYF
clone_137_seq_2	H11_PD1_KO_clonotype140	2	TRB:CASWGGSAETLYF;TRA:CALSSSNTNKVVF
[truncated: 1,028 more rows]
