# Supplementary material for: Propionyl-CoA carboxylase subunit B regulates anti-tumor T cells in a pancreatic cancer mouse model
Source: eLife. 2025 Mar 11;13:RP96925. doi: 10.7554/eLife.96925 (PMC11896608; doi:10.7554/eLife.96925)
Supplement: Supplementary file 1. [file elife-96925-supp1.xlsx]

## Sheet: aKO1
clone	clonotype_id	aKO	cdr3s_aa
clone_1_aK0	clonotype1aKO	183	TRB:CASRDRGLQNTLYF;TRA:CAMTYSAGNKLTF
clone_2_aK0	clonotype2aKO	128	TRB:CASSQEGRTDNERLFF;TRA:CAATRNNNNAPRF;TRA:CALPSNTNKVVF										1
clone_3_aK0	clonotype3aKO	105	TRB:CASSLRGSSAETLYF;TRA:CALGFSTNSAGNKLTF									170	1724
clone_4_aK0	clonotype4aKO	83	TRB:CASSGGAHAEQFF;TRA:CAASYQGGRALIF;TRA:CALRDNTNTGKLTF
clone_5_aK0	clonotype5aKO	83	TRB:CASSSRDFNYAEQFF;TRA:CALSGQGGRALIF;TRA:CAVRDPPWGSSGNKLIF
clone_6_aK0	clonotype6aKO	68	TRB:CASGDIQSNTEVFF;TRA:CAASEHGGSALGRLHF
clone_7_aK0	clonotype7aKO	57	TRB:CASSLGLGVNTGQLYF;TRA:CALGDLYSNNRLTL
clone_8_aK0	clonotype8aKO	57	TRB:CASSRTGLNQDTQYF;TRA:CAARGAGSFNKLTF
clone_9_aK0	clonotype9aKO	47	TRB:CASSLWDTANSDYTF;TRA:CAVSVGNYKYVF
clone_10_aK0	clonotype10aKO	36	TRB:CASGEGRGYEQYF;TRA:CAASKGRGYSNNRLTL
clone_11_aK0	clonotype11aKO	36	TRB:CASSLGGQYAEQFF;TRA:CALGDRGSALGRLHF;TRA:CALSGQGGRALIF
clone_12_aK0	clonotype12aKO	32	TRB:CASSQEGRTDNERLFF
clone_13_aK0	clonotype16aKO	31	TRB:CASSFSGTGNERLFF;TRA:CALTNYNQGKLIF
clone_14_aK0	clonotype13aKO	30	TRB:CASSSGTKDTQYF;TRA:CALGRNSNNRIFF
clone_15_aK0	clonotype18aKO	27	TRB:CTCSADLTGQLYF;TRA:CAANVNTGNYKYVF
clone_16_aK0	clonotype17aKO	24	TRB:CASSTPGTGNERLFF;TRA:CAVASSGSWQLIF
clone_17_aK0	clonotype19aKO	24	TRB:CASSQEGRTDNERLFF;TRA:CAARRNNNNAPRF
clone_18_aK0	clonotype20aKO	22	TRB:CTCSADERKNTLYF;TRA:CAVRLSSSGSWQLIF
clone_19_aK0	clonotype21aKO	21	TRB:CASSPPGRHAEQFF;TRA:CAMRSTSSGQKLVF
clone_20_aK0	clonotype23aKO	21	TRB:CASSQEGRTSNERLFF;TRA:CAAVRNNNNAPRF
clone_21_aK0	clonotype22aKO	19	TRB:CASSLGGASAETLYF;TRA:CAAEAWSNYNVLYF;TRA:CAISNNRIFF
clone_22_aK0	clonotype25aKO	17	TRB:CASSPGQVANSDYTF;TRA:CIVTEQTGGYKVVF
clone_23_aK0	clonotype26aKO	17	TRB:CASSQEGRTNTGQLYF;TRA:CAVSRNNNNAPRF
clone_24_aK0	clonotype27aKO	17	TRB:CTCSAVTGGREQYF;TRA:CALEPTGGNNKLTF;TRA:CAVSGNTGYQNFYF
clone_25_aK0	clonotype30aKO	17	TRB:CASSSRDFNYAEQFF
clone_26_aK0	clonotype14aKO	16	TRB:CASSLGDRQDTQYF;TRA:CAMEWTGGYKVVF
clone_27_aK0	clonotype15aKO	16	TRB:CASRSGTGGAQDTQYF;TRA:CAVSVSNTNKVVF
clone_28_aK0	clonotype28aKO	16	TRB:CASSLSGGGSSAETLYF
clone_29_aK0	clonotype29aKO	16	TRB:CASSQDLGGRGQNTLYF;TRA:CAAGGNNKLTF
clone_30_aK0	clonotype31aKO	15	TRB:CASSDAAERLFF;TRA:CAAMATGGNNKLTF;TRA:CAARALNQGGSAKLIF
clone_31_aK0	clonotype36aKO	14	TRB:CASSDDRNTEVFF;TRA:CAMSHSGTYQRF
clone_32_aK0	clonotype32aKO	13	TRB:CASSPGVSNERLFF;TRB:CASSQDAWGLYAEQFF;TRA:CALGDYSNNRLTL
clone_33_aK0	clonotype34aKO	12	TRB:CTCSAGTGRGTGQLYF;TRA:CALTAGGSNAKLTF
clone_34_aK0	clonotype35aKO	12	TRB:CASSDAAERLFF;TRA:CAGMATGGNNKLTF
clone_35_aK0	clonotype39aKO	12	TRB:CASGVRANSDYTF
clone_36_aK0	clonotype43aKO	12	TRB:CASSLEYEQYF;TRA:CAASNGGNNKLTF
clone_37_aK0	clonotype38aKO	11	TRB:CASSLGGSNERLFF;TRA:CALAYMGYKLTF
clone_38_aK0	clonotype40aKO	11	TRB:CASGDARTGGAHAEQFF;TRA:CAVRNMATGGNNKLTF
clone_39_aK0	clonotype41aKO	11	TRB:CASSLESRGRAQYF;TRA:CALGGGTGNTGKLIF
clone_40_aK0	clonotype42aKO	11	TRB:CASSQDWGGRGIYAEQFF;TRA:CAASEHSNMGYKLTF
clone_41_aK0	clonotype24aKO	10	TRB:CASGDFQPANTEVFF;TRA:CAARPPNQGGSAKLIF;TRA:CALDTQGTGSKLSF
clone_42_aK0	clonotype44aKO	10	TRB:CASSQERETLYF;TRA:CAVMLSGSFNKLTF
clone_43_aK0	clonotype46aKO	10	TRB:CASSQDGSPNSDYTF;TRB:CASSVPGQGRTGQLYF;TRA:CAVNSNNRIFF
clone_44_aK0	clonotype33aKO	9	TRB:CASSFHRGQDTQYF;TRA:CAIDRANSGTYQRF;TRA:CAVSMDMGYKLTF
clone_45_aK0	clonotype47aKO	9	TRB:CASGDYRDWGGRAEQFF;TRA:CAMERRGGATGGNNKLTF
clone_46_aK0	clonotype48aKO	9	TRB:CASSLGRYEQYF;TRA:CAMALNTGNYKYVF
clone_47_aK0	clonotype49aKO	9	TRB:CASSSGTKDTQYF;TRA:CALGRNSNNRIFF
clone_48_aK0	clonotype50aKO	9	TRB:CASSLAGGRDTEVFF;TRA:CAASAHDTNAYKVIF
clone_49_aK0	clonotype45aKO	8	TRB:CASRRDRTIYEQYF;TRA:CILFTGSGGKLTL
clone_50_aK0	clonotype51aKO	8	TRB:CASSLSGGGSSAETLYF;TRA:CAMREWGGSGGKLTL
clone_51_aK0	clonotype56aKO	8	TRB:CASSLGGQYAEQFF
clone_52_aK0	clonotype52aKO	7	TRB:CASSDDIQAPLF;TRA:CAGNNAGAKLTF
clone_53_aK0	clonotype55aKO	7	TRB:CASPTGERGERLFF;TRB:CASSIGGGRGAETLYF;TRA:CSASIYNQGKLIF
clone_54_aK0	clonotype58aKO	7	TRB:CASSLEYEQYF;TRA:CAASSGGNNKLTF;TRA:CALERGSGGSNYKLTF
clone_55_aK0	clonotype59aKO	7	TRB:CASGADRGRAETLYF;TRA:CAAFSGGSNAKLTF
clone_56_aK0	clonotype61aKO	7	TRB:CASSQQGYEQYF;TRA:CALEPGSWQLIF;TRA:CAVNYNQGKLIF
clone_57_aK0	clonotype62aKO	7	TRB:CAWSRLQVSNERLFF;TRA:CALSGGGANTGKLTF
clone_58_aK0	clonotype53aKO	6	TRB:CASSDGGSYEQYF;TRA:CAASATASLGKLQF
clone_59_aK0	clonotype57aKO	6	TRB:CASRDRDTEVFF;TRB:CASSFTGTGEWTLYF;TRA:CALSPYDTNAYKVIF
clone_60_aK0	clonotype64aKO	6	TRB:CASGDEDSAETLYF;TRA:CAVSPTGFASALTF
clone_61_aK0	clonotype71aKO	6	TRB:CASSNWGNYAEQFF;TRB:CASSQDLGGRGQNTLYF;TRA:CAASKGRGYSNNRLTL;TRA:CATGGNNKLTF
clone_62_aK0	clonotype72aKO	6	TRB:CTCSPSRGSAETLYF;TRA:CALRGTGNTGKLIF
clone_63_aK0	clonotype73aKO	6	TRB:CASGDARGYNSPLYF;TRA:CAASEKTGANTGKLTF
clone_64_aK0	clonotype54aKO	5	TRB:CASIGRSGNTLYF;TRB:CASSDQKISNERLFF;TRA:CAIGKMSNYNVLYF
clone_65_aK0	clonotype60aKO	5	TRB:CASSPRLGTNTGQLYF;TRB:CASSRDRRTLYF;TRA:CAARRDYNQGKLIF
clone_66_aK0	clonotype65aKO	5	TRB:CASRDSAETLYF;TRA:CAAEPTGGNNKLTF
clone_67_aK0	clonotype68aKO	5	TRB:CASSQDWVNTGQLYF;TRA:CAASPLLGSGGKLTL;TRA:CAMREGGSSNTNKVVF;TRA:CAMREGGSSNTNKVVF
clone_68_aK0	clonotype74aKO	5	TRB:CASSLVGGAAAEQFF
clone_69_aK0	clonotype75aKO	5	TRB:CASGDIQSNTEVFF;TRA:CAASEHGGSALGRLHF
clone_70_aK0	clonotype76aKO	5	TRB:CASSQELGSAETLYF;TRA:CALSEGTGYQNFYF
clone_71_aK0	clonotype78aKO	5	TRB:CASSMGQYYAEQFF;TRA:CALGGGYQNFYF;TRA:CALWESHMDYANKMIF
clone_72_aK0	clonotype103aKO	4	TRB:CASGGDRGRAETLYF;TRA:CAAFSGGSNAKLTF
clone_73_aK0	clonotype104aKO	4	TRB:CASGDWGGGTGQLYF;TRA:CAVSAHNNNAPRF
clone_74_aK0	clonotype105aKO	4	TRB:CASSLVGGAAAEQFF;TRA:CAADSSGSWQLIF;TRA:CVLSANTGYQNFYF
clone_75_aK0	clonotype37aKO	4	TRB:CASSSSGASAETLYF;TRA:CAAELMSNYNVLYF
clone_76_aK0	clonotype66aKO	4	TRB:CASSPQNTEVFF;TRA:CALRWSSGSWQLIF;TRA:CAMRERGGSALGRLHF
clone_77_aK0	clonotype79aKO	4	TRB:CASSPGGSGERLFF;TRB:CAWSLLLGVDTQYF;TRA:CALNSGGSNAKLTF
clone_78_aK0	clonotype84aKO	4	TRB:CAWSLDGQLYF;TRA:CATYHNYAQGLTF
clone_79_aK0	clonotype85aKO	4	TRB:CASGDQNTEVFF;TRB:CAWRKDRYNSPLYF;TRA:CAAHNNYAQGLTF
clone_80_aK0	clonotype86aKO	4	TRB:CASSDGTGNSDYTF;TRA:CALGAQGGSAKLIF
clone_81_aK0	clonotype92aKO	4	TRB:CASGDWGGNTGQLYF;TRA:CAARTGSGGKLTL
clone_82_aK0	clonotype97aKO	4	TRB:CASGDYRDWGGRAEQFF;TRA:CAMERRGGATGGNNKLTF
clone_83_aK0	clonotype98aKO	4	TRB:CASSIGLVQNTLYF;TRA:CAENTGANTGKLTF
clone_84_aK0	clonotype100aKO	3	TRB:CASGEQLRQYF;TRA:CAFNTGNYKYVF
clone_85_aK0	clonotype101aKO	3	TRB:CASGTGTANTEVFF;TRA:CAASEASSGSWQLIF;TRA:CALSERYNQGKLIF
clone_86_aK0	clonotype102aKO	3	TRB:CASGDARGYNSPLYF;TRA:CAMREAPTGGYKVVF
clone_87_aK0	clonotype106aKO	3	TRB:CASSQGPGVEQYF;TRA:CAIDTEGADRLTF
clone_88_aK0	clonotype107aKO	3	TRB:CAWSIQGNTEVFF;TRA:CILRGMATGGNNKLTF
clone_89_aK0	clonotype109aKO	3	TRB:CAWSLGGAETLYF;TRA:CALALYQGGRALIF
clone_90_aK0	clonotype111aKO	3	TRB:CASSQEDTAEQFF;TRA:CAVRAMDSNYQLIW;TRA:CAVSAASSGQKLVF
clone_91_aK0	clonotype112aKO	3	TRB:CASSENSNQDTQYF;TRA:CAAGNSNNRIFF
clone_92_aK0	clonotype113aKO	3	TRB:CASSQEGDLDTQYF;TRA:CATDAGYGSSGNKLIF
clone_93_aK0	clonotype114aKO	3	TRB:CASSQEDTQDTQYF;TRA:CAVSARTNAYKVIF
clone_94_aK0	clonotype116aKO	3	TRB:CASRTGTGGRVFF;TRA:CAAEAGGSNAKLTF
clone_95_aK0	clonotype117aKO	3	TRB:CASSQEGWGSYEQYF;TRA:CAASEGQGTGSKLSF
clone_96_aK0	clonotype118aKO	3	TRB:CASSFTGGQNTLYF;TRA:CALSTANYNVLYF
clone_97_aK0	clonotype119aKO	3	TRB:CASSSGGWDTQYF;TRA:CASLNTGANTGKLTF
clone_98_aK0	clonotype120aKO	3	TRB:CASSLGLSYEQYF;TRA:CAMREGTSSGQKLVF
clone_99_aK0	clonotype121aKO	3	TRB:CASSLGQNSDYTF;TRA:CAVIWGGGNNKLTF
clone_100_aK0	clonotype122aKO	3	TRB:CASSQELGSAETLYF;TRA:CALSDGTGYQNFYF
clone_101_aK0	clonotype123aKO	3	TRB:CASSLQGAPEQFF;TRA:CALSDPGYQNFYF
clone_102_aK0	clonotype125aKO	3	TRB:CASSPLDRGVEQYF;TRA:CAANQGGSAKLIF
clone_103_aK0	clonotype126aKO	3	TRB:CASSLGQGGNERLFF;TRB:CASSQDGRANTEVFF;TRA:CAALDSNYQLIW
clone_104_aK0	clonotype127aKO	3	TRB:CASSLEGTLNTEVFF;TRA:CAMRPITGNTGKLIF
clone_105_aK0	clonotype130aKO	3	TRB:CASSITTSGNTLYF;TRA:CAANNYAQGLTF
clone_106_aK0	clonotype132aKO	3	TRB:CASGDIQSNTEVFF;TRA:CAASEHGGSALGRLHF
clone_107_aK0	clonotype63aKO	3	TRB:CASSFGGGLNYAEQFF
clone_108_aK0	clonotype67aKO	3	TRB:CASRPGGANTEVFF;TRB:CGASRGTGQLYF;TRA:CAVSARGGRALIF
clone_109_aK0	clonotype69aKO	3	TRB:CASGDARDRGHERLFF;TRB:CASGDARDRGHERLFF;TRB:CASSWDNNYAEQFF;TRA:CAVSAMNYNQGKLIF
clone_110_aK0	clonotype70aKO	3	TRB:CASSPTGGALYEQYF;TRA:CALSEGGYSNNRLTL
clone_111_aK0	clonotype77aKO	3	TRB:CASSQETGGLSYEQYF;TRB:CTCSAAGAETLYF;TRA:CAASMPNYNVLYF
clone_112_aK0	clonotype81aKO	3	TRB:CASSFYNYEQYF;TRB:CASSQETEQFF;TRA:CAASERGSALGRLHF
clone_113_aK0	clonotype82aKO	3	TRB:CASSPGLGGYEQYF;TRA:CAVSRGFASALTF;TRA:CAVYANKMIF
clone_114_aK0	clonotype88aKO	3	TRB:CASSPGTDEQYF;TRA:CALSGQGGRALIF
clone_115_aK0	clonotype89aKO	3	TRB:CASSLRDWNTGQLYF;TRA:CALGTGNTGKLIF
clone_116_aK0	clonotype93aKO	3	TRB:CASSQAGSSAETLYF;TRA:CAAEAMSNYNVLYF;TRA:CAAEAYSGYNKLTF
clone_117_aK0	clonotype94aKO	3	TRB:CASSSTGSVAETLYF;TRA:CAAEPMSNYNVLYF
clone_118_aK0	clonotype96aKO	3	TRB:CASSLEGTSGNTLYF;TRA:CAFNMGYKLTF
clone_119_aK0	clonotype99aKO	3	TRB:CASSLSRHQAPLF;TRA:CALGVTGNTGKLIF
clone_120_aK0	clonotype110aKO	2	TRB:CGATGGLNERLFF;TRA:CALGDPNAGAKLTF
clone_121_aK0	clonotype115aKO	2	TRB:CASKQGAFSQNTLYF;TRA:CAMREGPNTGKLTF
clone_122_aK0	clonotype131aKO	2	TRB:CASSQEGTGKGTQYF;TRA:CAARSNTNKVVF
clone_123_aK0	clonotype136aKO	2	TRB:CASSDAAETLYF;TRA:CAAMATGGNNKLTF
clone_124_aK0	clonotype138aKO	2	TRB:CASGEGRGYEQYF;TRB:CASSQEGHQDTQYF;TRA:CAASKGRGYSNNRLTL
clone_125_aK0	clonotype139aKO	2	TRB:CATGDRGFGNTLYF;TRA:CAAGLYAQGLTF
clone_126_aK0	clonotype140aKO	2	TRB:CASSDGRGQNTLYF;TRA:CAMREGYNQGKLIF
clone_127_aK0	clonotype141aKO	2	TRB:CASSAGGDTGQLYF;TRA:CAASHQGGSAKLIF;TRA:CAMEQGGFASALTF
clone_128_aK0	clonotype142aKO	2	TRB:CASGGQNTLYF;TRA:CAIDLYNQGKLIF
clone_129_aK0	clonotype143aKO	2	TRB:CAWSLQVSNERLFF;TRA:CALGSGGSNAKLTF
clone_130_aK0	clonotype144aKO	2	TRB:CASSDRRNSDYTF;TRA:CAVSMNNYAQGLTF;TRA:CSASKNTNTGKLTF
clone_131_aK0	clonotype145aKO	2	TRB:CGARETVNQDTQYF;TRA:CAVSEVPNTGKLTF
clone_132_aK0	clonotype149aKO	2	TRB:CASSDASSAETLYF;TRA:CAARDNTGKLTF
clone_133_aK0	clonotype153aKO	2	TRB:CASSQDFWSYEQYF;TRA:CAASVGNNAGAKLTF
clone_134_aK0	clonotype155aKO	2	TRB:CASSLSQYEQYF;TRA:CALSDRRNAGAKLTF
clone_135_aK0	clonotype156aKO	2	TRB:CASSQERLGGYEQYF;TRA:CVLSAGSSGNKLIF
clone_136_aK0	clonotype157aKO	2	TRB:CASSQATDSGNTLYF;TRA:CAASMSGSGGKLTL
clone_137_aK0	clonotype159aKO	2	TRB:CASSHVGFNQDTQYF;TRB:CASSPRKQDTQYF;TRA:CALSMLNTNKVVF
clone_138_aK0	clonotype160aKO	2	TRB:CASSLERGREQYF;TRA:CAVSATGGNNKLTF
clone_139_aK0	clonotype161aKO	2	TRB:CASSFLGVSYEQYF;TRA:CAVSATNYNVLYF
clone_140_aK0	clonotype162aKO	2	TRB:CASSQDYANTGQLYF;TRA:CAPNSNNRIFF
clone_141_aK0	clonotype163aKO	2	TRB:CASSQDKYSGNTLYF;TRA:CAALNTNTGKLTF;TRA:CATDAGYNQGKLIF
clone_142_aK0	clonotype164aKO	2	TRB:CASSQMGSSAETLYF;TRA:CAAEEFSNYNVLYF
clone_143_aK0	clonotype165aKO	2	TRB:CASSLEDNSPLYF;TRB:CASSLRDSAETLYF;TRA:CARLTSGGNYKPTF
clone_144_aK0	clonotype167aKO	2	TRB:CASSFGQNYAEQFF;TRB:CAWSSRLGSNTGQLYF;TRA:CVLSAPNTNKVVF
clone_145_aK0	clonotype168aKO	2	TRB:CASSSGGTETLYF;TRA:CVLGEANYNVLYF
clone_146_aK0	clonotype169aKO	2	TRB:CASSLTGGQNTLYF;TRA:CALSPSNYNVLYF
clone_147_aK0	clonotype170aKO	2	TRB:CASSGTGGNYAEQFF;TRA:CATDATSSSFSKLVF
clone_148_aK0	clonotype171aKO	2	TRB:CASSQEGRTNTGQLYF;TRA:CAVSAGNTGKLTF
clone_149_aK0	clonotype172aKO	2	TRB:CASSDAAETLYF;TRB:CASSIEGQNAEQFF;TRA:CAAMATGGNNKLTF;TRA:CALSRGSALGRLHF
clone_150_aK0	clonotype174aKO	2	TRB:CASSLGQGGNTLYF;TRA:CAMREGSNTGKLTF;TRA:CAVKTASLGKLQF
clone_151_aK0	clonotype176aKO	2	TRB:CASSFQGGNTEVFF;TRA:CAASERRYNQGKLIF
clone_152_aK0	clonotype178aKO	2	TRB:CAWSPTSGTGGLDTQYF;TRA:CAVSEPSSGSWQLIF
clone_153_aK0	clonotype180aKO	2	TRB:CASSPLQGANTGQLYF;TRA:CALSGQGTGSKLSF
clone_154_aK0	clonotype183aKO	2	TRB:CASTPDWGGVAEQFF;TRA:CALSDVTGSGGKLTL
clone_155_aK0	clonotype184aKO	2	TRB:CTCSVGGRYAEQFF;TRA:CALTPGGSNAKLTF
clone_156_aK0	clonotype185aKO	2	TRB:CASSLYGGNTGQLYF;TRA:CAASTGSFNKLTF
clone_157_aK0	clonotype187aKO	2	TRB:CTCSARGGAAEQFF;TRA:CALSRNNYAQGLTF
clone_158_aK0	clonotype188aKO	2	TRB:CASSPLDRGVEQYF;TRA:CALGDDSNNRIFF
clone_159_aK0	clonotype189aKO	2	TRB:CTCSARTGVNERLFF;TRA:CAVSGGSGTYQRF
clone_160_aK0	clonotype192aKO	2	TRB:CASSSGTVFSNERLFF;TRA:CAASTGNTGKLIF
clone_161_aK0	clonotype194aKO	2	TRB:CTCSASQGERNSPLYF;TRA:CALKNYNQGKLIF
clone_162_aK0	clonotype196aKO	2	TRB:CASGTGDSDYTF;TRA:CAASEGGNYKYVF
clone_163_aK0	clonotype197aKO	2	TRB:CASGEQGRNSPLYF;TRA:CAAERGSSGNKLIF
clone_164_aK0	clonotype198aKO	2	TRB:CASSLDNSGNTLYF;TRA:CAVSRATSSGQKLVF
clone_165_aK0	clonotype199aKO	2	TRB:CASGDADRANSDYTF;TRA:CAAEANSGTYQRF;TRA:CAAHGGSWQLIF
clone_166_aK0	clonotype201aKO	2	TRB:CASSFGGGLNYAEQFF;TRB:CGARGGRRDTQYF;TRA:CALSVNNNNAPRF;TRA:CAVRVMATGGNNKLTF
clone_167_aK0	clonotype83aKO	2	TRB:CASGDTGGNYAEQFF
clone_168_aK0	clonotype87aKO	2	TRB:CASSLDAEQFF;TRA:CAARRAGNTGKLIF
clone_169_aK0	clonotype91aKO	2	TRB:CASSAAGQFSNERLFF;TRB:CASSSGGSYNSPLYF;TRA:CALGEGQGGRALIF
clone_170_aK0	clonotype95aKO	2	TRB:CASSQTGASAETLYF;TRA:CAAEAFSNYNVLYF
clone_171_aK0	clonotype1000aKO	1	TRB:CASSQEGHSNERLFF;TRA:CAASEGGRALIF
clone_172_aK0	clonotype1002aKO	1	TRB:CASSPLGINQDTQYF;TRA:CAAMDSNYQLIW
clone_173_aK0	clonotype1003aKO	1	TRB:CASSLRDRGAETLYF;TRA:CILRASNQGGSAKLIF
clone_174_aK0	clonotype1005aKO	1	TRB:CASSKGISNERLFF;TRA:CAMERRTNTGKLTF
clone_175_aK0	clonotype1007aKO	1	TRB:CASSLTGGNEQYF;TRA:CAIDRDGSGTYQRF
clone_176_aK0	clonotype1008aKO	1	TRB:CASSFGGAETLYF;TRA:CAVGGYAQGLTF
clone_177_aK0	clonotype1009aKO	1	TRB:CASSEGRGSAETLYF;TRA:CAAGATSSGQKLVF
clone_178_aK0	clonotype1010aKO	1	TRB:CASSDLGGRLAEQFF;TRA:CAVSGNTNKVVF
clone_179_aK0	clonotype1011aKO	1	TRB:CASSDWDRGYAEQFF;TRA:CATGNAGAKLTF
clone_180_aK0	clonotype1012aKO	1	TRB:CASGADRGRAETLYF;TRA:CAAFSGGSNAKLTF
clone_181_aK0	clonotype1013aKO	1	TRB:CASSQDSYNSPLYF;TRA:CAAMTNSAGNKLTF
clone_182_aK0	clonotype1014aKO	1	TRB:CASSQDDSQNTLYF;TRA:CAAEANNAGAKLTF
clone_183_aK0	clonotype1015aKO	1	TRB:CASSQVGGRHEQYF;TRA:CAVSFSNNRIFF
clone_184_aK0	clonotype1016aKO	1	TRB:CASSPTISNERLFF;TRA:CAAEAAGNTGKLIF
clone_185_aK0	clonotype1017aKO	1	TRB:CTCSADRTEVFF;TRA:CAAEEGSALGRLHF
clone_186_aK0	clonotype1018aKO	1	TRB:CASSMRNEQYF;TRA:CALTSGGNYKPTF
clone_187_aK0	clonotype1019aKO	1	TRB:CASSQNRVNYAEQFF;TRA:CALSPITGNTGKLIF;TRA:CAVNAGAKLTF
clone_188_aK0	clonotype1020aKO	1	TRB:CASSQDIYNYAEQFF;TRB:CASSRSGINTEVFF;TRA:CAAHSNNRIFF;TRA:CAVSMWQGGRALIF
clone_189_aK0	clonotype1021aKO	1	TRB:CASSQDRLGKNTLYF;TRA:CALGLNSNNRIFF
clone_190_aK0	clonotype1022aKO	1	TRB:CASSPAGGKEQYF;TRA:CAASRGSNYKLTF
clone_191_aK0	clonotype1023aKO	1	TRB:CASSSTGAYEQYF;TRA:CAARTGNTGKLIF
clone_192_aK0	clonotype1024aKO	1	TRB:CASSLGRQNTLYF;TRA:CAENTEGADRLTF
clone_193_aK0	clonotype1025aKO	1	TRB:CASSLPGTNERLFF;TRB:CASSSWTTNTEVFF;TRA:CASNAGAKLTF
clone_194_aK0	clonotype1026aKO	1	TRB:CASSFTGDTEVFF;TRA:CAAEAFGANTGKLTF
clone_195_aK0	clonotype1027aKO	1	TRB:CASSLGGAYEQYF;TRA:CAVTNYNQGKLIF
clone_196_aK0	clonotype1028aKO	1	TRB:CASSYTGDAEQFF;TRA:CALGNYQLIW
clone_197_aK0	clonotype1029aKO	1	TRB:CASSPLGGHEQYF;TRB:CASSSGQPNTEVFF;TRA:CALDPHDTNAYKVIF;TRA:CAVSVAGGYKVVF
clone_198_aK0	clonotype1030aKO	1	TRB:CASSHRGRSQNTLYF;TRA:CAVSMPGYQNFYF
clone_199_aK0	clonotype1032aKO	1	TRB:CASSQERGNSPLYF;TRA:CGRGGSALGRLHF
clone_200_aK0	clonotype1033aKO	1	TRB:CASSQTGGYAEQFF;TRA:CASSGTGGYKVVF
clone_201_aK0	clonotype1034aKO	1	TRB:CASSLTGAGNTLYF;TRA:CALRRDSGTYQRF
clone_202_aK0	clonotype1035aKO	1	TRB:CTCSAKYTEVFF;TRA:CAASQDYAQGLTF
clone_203_aK0	clonotype1036aKO	1	TRB:CAKRQGSSAETLYF;TRA:CAVSADSNNRIFF
clone_204_aK0	clonotype1037aKO	1	TRB:CASSSPGNNSPLYF;TRA:CARNYAQGLTF
clone_205_aK0	clonotype1039aKO	1	TRB:CASSQEDRGGNTQYF;TRA:CAVSEGPGGRALIF
clone_206_aK0	clonotype1040aKO	1	TRB:CASSQDHRNTGQLYF;TRA:CAVRDDSGYNKLTF
clone_207_aK0	clonotype1041aKO	1	TRB:CASGADRGRAETLYF;TRB:CAWSLWTGGDTGQLYF;TRA:CALEGYNQGKLIF
clone_208_aK0	clonotype1042aKO	1	TRB:CASSRRDWGGEQYF;TRA:CAARAGTGSKLSF
clone_209_aK0	clonotype1044aKO	1	TRB:CASSLDPGYEQYF;TRA:CAASRGNEKITF
clone_210_aK0	clonotype1045aKO	1	TRB:CASSFSYNSPLYF;TRA:CALGANNNNAPRF
clone_211_aK0	clonotype1046aKO	1	TRB:CASSLAWGNTLYF;TRA:CAASHSNNRIFF
clone_212_aK0	clonotype1047aKO	1	TRB:CASSLGNQDTQYF;TRA:CAVKATGGNNKLTF
clone_213_aK0	clonotype1048aKO	1	TRB:CASRGYSGNTLYF;TRA:CALSDGTGGYKVVF
clone_214_aK0	clonotype1049aKO	1	TRB:CASRGQGYNYAEQFF;TRA:CATGANYGNEKITF
clone_215_aK0	clonotype1050aKO	1	TRB:CASSEGTGGFQNTLYF;TRA:CAVRSNYNVLYF
clone_216_aK0	clonotype1051aKO	1	TRB:CASSQDRRQDTQYF;TRA:CAMGLNTGGLSGKLTF
clone_217_aK0	clonotype1052aKO	1	TRB:CASSHTTANTEVFF;TRA:CAVRGSSGSWQLIF
clone_218_aK0	clonotype1053aKO	1	TRB:CASSPQGDNQAPLF;TRA:CATDARTNTGKLTF
clone_219_aK0	clonotype1054aKO	1	TRB:CASSYGTTNSDYTF;TRA:CAVSTGTGGYKVVF
clone_220_aK0	clonotype1055aKO	1	TRB:CASSFQAATGQLYF;TRA:CAARMNYNQGKLIF
clone_221_aK0	clonotype1056aKO	1	TRB:CASSSGTGFSPLYF;TRA:CVLGEPSGSWQLIF
clone_222_aK0	clonotype1057aKO	1	TRB:CASSLSNSGNTLYF;TRA:CAVSAPHSGSWQLIF
clone_223_aK0	clonotype1059aKO	1	TRB:CASSSWGEDTQYF;TRB:CASSTISNERLFF;TRA:CATDYNVGDNSKLIW
clone_224_aK0	clonotype1060aKO	1	TRB:CASSLGQKDTQYF;TRA:CAARDSGYNKLTF
clone_225_aK0	clonotype1061aKO	1	TRB:CASSSDSQNTLYF;TRA:CAASEPNYNQGKLIF
clone_226_aK0	clonotype1062aKO	1	TRB:CASSWRANTEVFF;TRA:CAAHEEGNMGYKLTF
clone_227_aK0	clonotype1064aKO	1	TRB:CASSLDRDYEQYF;TRA:CAASRQAGNTGKLIF
clone_228_aK0	clonotype1065aKO	1	TRB:CASSGIWGGQDTQYF;TRA:CALGGTGSKLSF
clone_229_aK0	clonotype1066aKO	1	TRB:CASSDWGSSSAETLYF;TRA:CAADNTNTGKLTF
clone_230_aK0	clonotype1067aKO	1	TRB:CASSSPGRYAEQFF;TRA:CALSDGGYKVVF
clone_231_aK0	clonotype1068aKO	1	TRB:CASSLGKNTLYF;TRB:CASSPGKENSPLYF;TRA:CALSMGNSAGNKLTF
clone_232_aK0	clonotype1070aKO	1	TRB:CASSQDRGRGERLFF;TRA:CALGHDSGYNKLTF
clone_233_aK0	clonotype1071aKO	1	TRB:CASSQDTGGNSDYTF;TRA:CAVSPSSGSWQLIF
clone_234_aK0	clonotype1072aKO	1	TRB:CASSQGQGSNERLFF;TRB:CASTGHKNYAEQFF;TRA:CALSEWSNYQLIW;TRA:CAVSPPTASLGKLQF
clone_235_aK0	clonotype1073aKO	1	TRB:CASSSEQSYEQYF;TRA:CALGADQGGRALIF
clone_236_aK0	clonotype1074aKO	1	TRB:CASSSGLVYEQYF;TRA:CAVSTYGSSGNKLIF
clone_237_aK0	clonotype1075aKO	1	TRB:CASSLGGNERLFF;TRA:CALGVNYNQGKLIF
clone_238_aK0	clonotype1077aKO	1	TRB:CASSPRDRGGQYF;TRA:CAASEGGSNAKLTF
clone_239_aK0	clonotype1079aKO	1	TRB:CASSRRIGERLFF;TRA:CAASEHGRSGSWQLIF
clone_240_aK0	clonotype1080aKO	1	TRB:CASSDRGQNSGNTLYF;TRA:CAVSGYQGGRALIF
clone_241_aK0	clonotype1081aKO	1	TRB:CASSQEGLNTEVFF;TRA:CALGEPGGNYKPTF
clone_242_aK0	clonotype1082aKO	1	TRB:CASSSTYSGNTLYF;TRA:CALVMSNYNVLYF
clone_243_aK0	clonotype1083aKO	1	TRB:CASSLGPGEDTQYF;TRA:CALSGTTGYQNFYF
clone_244_aK0	clonotype1084aKO	1	TRB:CASSFGQGVYEQYF;TRA:CVVGDRGSALGRLHF
clone_245_aK0	clonotype1085aKO	1	TRB:CASSQDWGGQDTQYF;TRA:CALAPSNSNNRIFF
clone_246_aK0	clonotype1086aKO	1	TRB:CASSQETGANSDYTF;TRA:CALGGNAGAKLTF
clone_247_aK0	clonotype1087aKO	1	TRB:CASSPGLGSAETLYF;TRA:CVVGDRGSALGRLHF
clone_248_aK0	clonotype1088aKO	1	TRB:CASSSSPYAEQFF;TRA:CAVALTNSAGNKLTF
clone_249_aK0	clonotype1089aKO	1	TRB:CASSLVGNERLFF;TRA:CALRENNNAGAKLTF
clone_250_aK0	clonotype108aKO	1	TRB:CASSGGGNSPLYF;TRA:CAASIGDNSKLIW
clone_251_aK0	clonotype1091aKO	1	TRB:CASSRGGGDTEVFF;TRA:CALGDKTSSGQKLVF
clone_252_aK0	clonotype1092aKO	1	TRB:CASSLWSNTEVFF;TRA:CAASTYGSSGNKLIF
clone_253_aK0	clonotype1093aKO	1	TRB:CASSPGSNQAPLF;TRA:CALMTNSAGNKLTF
clone_254_aK0	clonotype1094aKO	1	TRB:CASSDWGANTGQLYF;TRA:CAVNLNNNAGAKLTF
clone_255_aK0	clonotype1095aKO	1	TRB:CTCSGTAYEQYF;TRA:CVVGDRGSALGRLHF
clone_256_aK0	clonotype1096aKO	1	TRB:CTCSGSAETLYF;TRA:CAMREANTGANTGKLTF
clone_257_aK0	clonotype1097aKO	1	TRB:CASSQEGKNTGQLYF;TRA:CAMRAPQGGRALIF
clone_258_aK0	clonotype1098aKO	1	TRB:CASSQDRLAQDTQYF;TRA:CALSELGTNTGKLTF
clone_259_aK0	clonotype1099aKO	1	TRB:CASSPPWGVQDTQYF;TRA:CAMREGDTGNYKYVF
clone_260_aK0	clonotype1100aKO	1	TRB:CASSRGGARYEQYF;TRB:CTCSAGSGNTLYF;TRA:CALGRSSNTNKVVF
clone_261_aK0	clonotype1101aKO	1	TRB:CASSGDSQDTQYF;TRA:CALSPLASSSFSKLVF
clone_262_aK0	clonotype1102aKO	1	TRB:CASGDTDRGNTLYF;TRB:CASSLAGGDEQYF;TRA:CALSDQYNAGAKLTF;TRA:CAMRESTGSGGKLTL
clone_263_aK0	clonotype1103aKO	1	TRB:CASSLTAYAEQFF;TRA:CAVSDANTGANTGKLTF
clone_264_aK0	clonotype1104aKO	1	TRB:CASSLWTQQNTLYF;TRA:CAMREEGTEGADRLTF
clone_265_aK0	clonotype1105aKO	1	TRB:CASSWGQNERLFF;TRA:CAMRKNTGANTGKLTF
clone_266_aK0	clonotype1106aKO	1	TRB:CASSLRVNTEVFF;TRA:CAAGNYNVLYF
clone_267_aK0	clonotype1107aKO	1	TRB:CASGDHRIANSDYTF;TRA:CALTDLPGTGSNRLTF
clone_268_aK0	clonotype1109aKO	1	TRB:CASSLEENTEVFF;TRA:CAASGSNNRIFF
clone_269_aK0	clonotype1110aKO	1	TRB:CASSSNANTEVFF;TRA:CALSDQDSGGSNYKLTF
clone_270_aK0	clonotype1111aKO	1	TRB:CASSPLDRGVEQYF;TRB:CASSSGQGTEVFF;TRA:CAARGSNAKLTF
clone_271_aK0	clonotype1113aKO	1	TRB:CASRPDRGREQYF;TRA:CAAMATGGNNKLTF
clone_272_aK0	clonotype1114aKO	1	TRB:CASSLGRSYEQYF;TRA:CAARVNTGNYKYVF
clone_273_aK0	clonotype1115aKO	1	TRB:CASSRDWGGDTLYF;TRA:CAARGAGGYKVVF
clone_274_aK0	clonotype1116aKO	1	TRB:CASSKQDSNERLFF;TRA:CAARTQVVGQLTF
clone_275_aK0	clonotype1117aKO	1	TRB:CASSPWRGNTEVFF;TRA:CAASESNYAQGLTF
clone_276_aK0	clonotype1119aKO	1	TRB:CASSPDWGDSYEQYF;TRA:CAASEASNNRIFF
clone_277_aK0	clonotype1120aKO	1	TRB:CASSPDWGNQDTQYF;TRA:CAASRSSGSWQLIF
clone_278_aK0	clonotype1121aKO	1	TRB:CASSDWGQGEAERLFF;TRA:CAASDRGGSAKLIF
clone_279_aK0	clonotype1122aKO	1	TRB:CARERGARAETLYF;TRB:CASSQEGTGGAETLYF;TRA:CAAYNTGNYKYVF
clone_280_aK0	clonotype1123aKO	1	TRB:CTCSTQGWEQYF;TRA:CAASETGNYKYVF
clone_281_aK0	clonotype1124aKO	1	TRB:CASGLQGDNQAPLF;TRB:CASRQGANERLFF;TRA:CAAGSLNQGGSAKLIF
clone_282_aK0	clonotype1125aKO	1	TRB:CASSDGGFSSYEQYF;TRA:CAASKAGSGGKLTL
clone_283_aK0	clonotype1126aKO	1	TRB:CASSQDTANSDYTF;TRA:CAASFGSSGNKLIF
clone_284_aK0	clonotype1127aKO	1	TRB:CASSRGQYAEQFF;TRA:CAASAVGSSGNKLIF
clone_285_aK0	clonotype1129aKO	1	TRB:CASSQEPDSGNTLYF;TRA:CALSDRYNKLTF
clone_286_aK0	clonotype1130aKO	1	TRB:CASSTDGFYEQYF;TRA:CALSDSNYQLIW
clone_287_aK0	clonotype1131aKO	1	TRB:CASSFGTKDTQYF;TRA:CALSRNSNNRIFF
clone_288_aK0	clonotype1132aKO	1	TRB:CASSLGQAETLYF;TRA:CALRGTGNTGKLIF
clone_289_aK0	clonotype1133aKO	1	TRB:CASSRDNYAEQFF;TRA:CALTYVGDNSKLIW
clone_290_aK0	clonotype1134aKO	1	TRA:CVVGAGSNYQLIW
clone_291_aK0	clonotype1135aKO	1	TRA:CAASEHSNMGYKLTF
clone_292_aK0	clonotype1136aKO	1	TRA:CAASEHSNMGYKLTF
clone_293_aK0	clonotype1137aKO	1	TRA:CAASEHSNMGYKLTF
clone_294_aK0	clonotype1140aKO	1	TRB:CASSTGGSDYTF
clone_295_aK0	clonotype1141aKO	1	TRB:CASSIRGLEQYF
clone_296_aK0	clonotype1142aKO	1	TRA:CVLGPFNAGAKLTF
clone_297_aK0	clonotype1144aKO	1	TRA:CALSDPGYQNFYF
clone_298_aK0	clonotype1145aKO	1	TRA:CAVSDPGGYKVVF
clone_299_aK0	clonotype1147aKO	1	TRA:CAASYQGGRALIF
clone_300_aK0	clonotype1148aKO	1	TRA:CAASYQGGRALIF
clone_301_aK0	clonotype1149aKO	1	TRB:CASSSGTGNTGQLYF
clone_302_aK0	clonotype1150aKO	1	TRB:CASRDTNSYNSPLYF
clone_303_aK0	clonotype1151aKO	1	TRB:CASSNRGDNNQAPLF
clone_304_aK0	clonotype1153aKO	1	TRB:CASSSGGSYNSPLYF
clone_305_aK0	clonotype1154aKO	1	TRB:CASSLQGQANSDYTF
clone_306_aK0	clonotype1156aKO	1	TRB:CASSLSRASAETLYF
clone_307_aK0	clonotype1157aKO	1	TRB:CASSLSLSNQDTQYF
clone_308_aK0	clonotype1158aKO	1	TRB:CASSLWDSSGNTLYF
clone_309_aK0	clonotype1159aKO	1	TRB:CASSQDGGDNYAEQFF
clone_310_aK0	clonotype1160aKO	1	TRB:CASSQEGHNNNQAPLF
clone_311_aK0	clonotype1161aKO	1	TRB:CASSQEGLGGAETLYF
clone_312_aK0	clonotype1162aKO	1	TRB:CASSQEGRTDNERLFF
clone_313_aK0	clonotype1163aKO	1	TRB:CASSQEGRTDNERLFF
clone_314_aK0	clonotype1164aKO	1	TRB:CASSQEGGGRSYEQYF
clone_315_aK0	clonotype1165aKO	1	TRB:CASSQDMGQGAERLFF
clone_316_aK0	clonotype1166aKO	1	TRB:CASSQDWGRAGNTLYF
clone_317_aK0	clonotype1167aKO	1	TRB:CASSQAGTGGSERLFF
clone_318_aK0	clonotype1168aKO	1	TRB:CASSPLQGANTGQLYF
clone_319_aK0	clonotype1169aKO	1	TRB:CASSPLQGANTGQLYF
clone_320_aK0	clonotype1170aKO	1	TRB:CASSPRLGGYQDTQYF
clone_321_aK0	clonotype1171aKO	1	TRA:CAVSVNTGYQNFYF
clone_322_aK0	clonotype1172aKO	1	TRA:CVLTITGNTGKLIF
clone_323_aK0	clonotype1173aKO	1	TRA:CVLSANTGYQNFYF
clone_324_aK0	clonotype1174aKO	1	TRA:CVLSANTGYQNFYF
clone_325_aK0	clonotype1175aKO	1	TRA:CAVRDPPWGSSGNKLIF
clone_326_aK0	clonotype1176aKO	1	TRB:CAWSPTSGTGGLDTQYF
clone_327_aK0	clonotype1177aKO	1	TRB:CAWSPTSGTGGLDTQYF
clone_328_aK0	clonotype1178aKO	1	TRB:CAWSPTSGTGGLDTQYF
clone_329_aK0	clonotype1179aKO	1	TRB:CAWSLGWGGSSAETLYF
clone_330_aK0	clonotype1180aKO	1	TRA:CALSGQGGRALIF
clone_331_aK0	clonotype1181aKO	1	TRA:CALSGQGGRALIF
clone_332_aK0	clonotype1182aKO	1	TRA:CALGTSNTNKVVF
clone_333_aK0	clonotype1183aKO	1	TRA:CALGETNYNVLYF
clone_334_aK0	clonotype1184aKO	1	TRB:CASSNRGNQDTQYF
clone_335_aK0	clonotype1185aKO	1	TRB:CASSNWGNYAEQFF
clone_336_aK0	clonotype1186aKO	1	TRB:CASSNWGNYAEQFF
clone_337_aK0	clonotype1187aKO	1	TRB:CASSSQRGQNTLYF
clone_338_aK0	clonotype1188aKO	1	TRB:CASSPRGGNTEVFF
clone_339_aK0	clonotype1189aKO	1	TRB:CASSPDRANTEVFF
clone_340_aK0	clonotype1190aKO	1	TRB:CASSRDRGAETLYF
clone_341_aK0	clonotype1191aKO	1	TRB:CASSLRDRKYEQYF
clone_342_aK0	clonotype1192aKO	1	TRB:CASSSPTDTGQLYF
clone_343_aK0	clonotype1193aKO	1	TRB:CASSSLKNTGQLYF
clone_344_aK0	clonotype1194aKO	1	TRB:CASSSGQGYAEQFF
clone_345_aK0	clonotype1195aKO	1	TRB:CASSWDWGVDTQYF
clone_346_aK0	clonotype1196aKO	1	TRB:CASSWGQGGTEVFF
clone_347_aK0	clonotype1197aKO	1	TRB:CASSLKLGENTLYF
clone_348_aK0	clonotype1198aKO	1	TRB:CASSLESRGRAQYF
clone_349_aK0	clonotype1199aKO	1	TRB:CASSLESRGRAQYF
clone_350_aK0	clonotype1200aKO	1	TRB:CASSLESRGRAQYF
clone_351_aK0	clonotype1201aKO	1	TRB:CASSLEGNTGQLYF
clone_352_aK0	clonotype1202aKO	1	TRB:CASSLEGRGNTLYF
clone_353_aK0	clonotype1203aKO	1	TRB:CASSLEGRGNTLYF
clone_354_aK0	clonotype1204aKO	1	TRB:CASSLDRGGTEVFF
clone_355_aK0	clonotype1205aKO	1	TRB:CASSLEGSNTEVFF
clone_356_aK0	clonotype1206aKO	1	TRB:CASSLDGSQDTQYF
clone_357_aK0	clonotype1208aKO	1	TRB:CASSLAGDYAEQFF
clone_358_aK0	clonotype1209aKO	1	TRB:CASSLALRNSDYTF
clone_359_aK0	clonotype1210aKO	1	TRB:CASSLGQSAETLYF
clone_360_aK0	clonotype1211aKO	1	TRB:CASSLGTGTYEQYF
clone_361_aK0	clonotype1212aKO	1	TRB:CASSLGRQGDTQYF
clone_362_aK0	clonotype1213aKO	1	TRB:CASSLGGNYAEQFF
clone_363_aK0	clonotype1215aKO	1	TRB:CASSLVGQNTEVFF
clone_364_aK0	clonotype1216aKO	1	TRB:CASSLVWGAETLYF
clone_365_aK0	clonotype1217aKO	1	TRB:CASSFRGSSYEQYF
clone_366_aK0	clonotype1218aKO	1	TRB:CASSRDRSAETLYF
clone_367_aK0	clonotype1219aKO	1	TRB:CASSSGTGGAEVFF
clone_368_aK0	clonotype1220aKO	1	TRB:CASSRMGESNERLFF
clone_369_aK0	clonotype1221aKO	1	TRB:CASSPLDRGVEQYF
clone_370_aK0	clonotype1222aKO	1	TRB:CASSPLDRGVEQYF
clone_371_aK0	clonotype1223aKO	1	TRB:CASSPGTGGYEQYF
clone_372_aK0	clonotype1224aKO	1	TRB:CASSGTGGYAEQFF
clone_373_aK0	clonotype1225aKO	1	TRB:CASSLEGGQDTQYF
clone_374_aK0	clonotype1226aKO	1	TRB:CASSLGDWGVEQYF
clone_375_aK0	clonotype1227aKO	1	TRB:CASSLGGQYAEQFF
clone_376_aK0	clonotype1228aKO	1	TRB:CASSLGGQYAEQFF
clone_377_aK0	clonotype1229aKO	1	TRB:CASSLGGEQNTLYF
clone_378_aK0	clonotype1230aKO	1	TRB:CASSLGGEQNTLYF
clone_379_aK0	clonotype1232aKO	1	TRB:CASSFDNNNQAPLF
clone_380_aK0	clonotype1233aKO	1	TRB:CASSLGGTGVEQYF
clone_381_aK0	clonotype1234aKO	1	TRB:CASSPGTGENTLYF
clone_382_aK0	clonotype1235aKO	1	TRB:CASSDWGGAREQYF
clone_383_aK0	clonotype1237aKO	1	TRB:CASSPDSNYAEQFF
clone_384_aK0	clonotype1238aKO	1	TRB:CASSRGHSNSDYTF
clone_385_aK0	clonotype1240aKO	1	TRB:CASSLQNSNERLFF
clone_386_aK0	clonotype1241aKO	1	TRB:CASSLDKNTGQLYF
clone_387_aK0	clonotype1242aKO	1	TRB:CASSLDNSGNTLYF
clone_388_aK0	clonotype1243aKO	1	TRB:CASSLDRAGSDYTF
clone_389_aK0	clonotype1244aKO	1	TRB:CASSLSTGNTEVFF
clone_390_aK0	clonotype1245aKO	1	TRB:CASSLQNYNSPLYF
clone_391_aK0	clonotype1246aKO	1	TRB:CASSDWGGGREQYF
clone_392_aK0	clonotype1247aKO	1	TRB:CASSYRDRVTEVFF
clone_393_aK0	clonotype1248aKO	1	TRB:CASRGQSSQNTLYF
clone_394_aK0	clonotype1249aKO	1	TRB:CASRDRGLQNTLYF
clone_395_aK0	clonotype124aKO	1	TRB:CASSLGGRSAETLYF;TRA:CAAEALSNYNVLYF
clone_396_aK0	clonotype1250aKO	1	TRB:CASSLGTANTEVFF
clone_397_aK0	clonotype1251aKO	1	TRB:CASSFHRGQDTQYF
clone_398_aK0	clonotype1252aKO	1	TRB:CASSFHRGQDTQYF
clone_399_aK0	clonotype1254aKO	1	TRB:CASSPDWGGYEQYF
clone_400_aK0	clonotype1255aKO	1	TRB:CASSSDWGDYEQYF
clone_401_aK0	clonotype1256aKO	1	TRB:CASSPGTYYAEQFF
clone_402_aK0	clonotype1257aKO	1	TRB:CASSRDSSQNTLYF
clone_403_aK0	clonotype1260aKO	1	TRB:CASSFDTSSYEQYF
clone_404_aK0	clonotype1261aKO	1	TRB:CASSLGQGAERLFF
clone_405_aK0	clonotype1262aKO	1	TRB:CASSLGGDTGQLYF
clone_406_aK0	clonotype1263aKO	1	TRB:CASSFSVSNERLFF
clone_407_aK0	clonotype1264aKO	1	TRB:CASSDKGQISNERLFF
clone_408_aK0	clonotype1265aKO	1	TRB:CASSERLGGVQDTQYF
clone_409_aK0	clonotype1266aKO	1	TRB:CASSDRDWALQNTLYF
clone_410_aK0	clonotype1267aKO	1	TRB:CASSDGTGGLYTEVFF
clone_411_aK0	clonotype1268aKO	1	TRB:CASGDAGRGGDTEVFF
clone_412_aK0	clonotype1269aKO	1	TRB:CASGDAGQGANTEVFF
clone_413_aK0	clonotype1270aKO	1	TRB:CASGAAGADSGNTLYF
clone_414_aK0	clonotype1271aKO	1	TRB:CASSDPGLGESSYEQYF
clone_415_aK0	clonotype1272aKO	1	TRB:CASSFSGESLSNERLFF
clone_416_aK0	clonotype1273aKO	1	TRB:CASSQSLLGGDTLYF
clone_417_aK0	clonotype1274aKO	1	TRB:CASSQEADSGNTLYF
clone_418_aK0	clonotype1275aKO	1	TRB:CASSQEGTGPETLYF
clone_419_aK0	clonotype1276aKO	1	TRB:CASSRDNSYNSPLYF
clone_420_aK0	clonotype1277aKO	1	TRB:CASSQAGSSAETLYF
clone_421_aK0	clonotype1278aKO	1	TRB:CASSQAGSSAETLYF
clone_422_aK0	clonotype1279aKO	1	TRB:CASSQTGRAGNTLYF
clone_423_aK0	clonotype1280aKO	1	TRB:CASSPRDWTSGTQYF
clone_424_aK0	clonotype1281aKO	1	TRB:CASSPDWGNYAEQFF
clone_425_aK0	clonotype1282aKO	1	TRB:CASSPGTTSQNTLYF
clone_426_aK0	clonotype1283aKO	1	TRB:CASSLRDRGPSDYTF
clone_427_aK0	clonotype1284aKO	1	TRB:CASSLGGASAETLYF
clone_428_aK0	clonotype1285aKO	1	TRB:CASSLGGASAETLYF
clone_429_aK0	clonotype1286aKO	1	TRB:CASSLGGASAETLYF
clone_430_aK0	clonotype1287aKO	1	TRB:CASSFRDKGNTEVFF
clone_431_aK0	clonotype1288aKO	1	TRB:CSSSQGGNTGQLYF
clone_432_aK0	clonotype1289aKO	1	TRB:CTCRTGENTEVFF
clone_433_aK0	clonotype128aKO	1	TRB:CASSSGTANTEVFF;TRA:CVLGDGSNMGYKLTF
clone_434_aK0	clonotype1290aKO	1	TRB:CTCSTGGQNTLYF
clone_435_aK0	clonotype1291aKO	1	TRB:CTCSANRNSDYTF
clone_436_aK0	clonotype1293aKO	1	TRB:CTCSADYYAEQFF
clone_437_aK0	clonotype1295aKO	1	TRB:CTCSAVGGAEQFF
clone_438_aK0	clonotype1296aKO	1	TRB:CTCSAGQKNTLYF
clone_439_aK0	clonotype1297aKO	1	TRB:CTCSAWGGDEQYF
clone_440_aK0	clonotype1299aKO	1	TRB:CASSSGLGGYEQYF;TRA:CAIDSNNRIFF
clone_441_aK0	clonotype1300aKO	1	TRB:CASSLSPGRNSPLYF;TRA:CILRVTGSGGKLTL
clone_442_aK0	clonotype1301aKO	1	TRB:CASSRPGGVSAETLYF;TRA:CAAANSGTYQRF
clone_443_aK0	clonotype1302aKO	1	TRB:CASSLTPLNSDYTF;TRA:CAADANTGKLTF
clone_444_aK0	clonotype1303aKO	1	TRB:CASSLERPNTEVFF;TRA:CATDHYSNNRLTL
clone_445_aK0	clonotype1304aKO	1	TRB:CASSSTDSYNSPLYF;TRA:CAIEGNAYKVIF
clone_446_aK0	clonotype1305aKO	1	TRB:CTCSAALNTEVFF;TRA:CADNNAGAKLTF
clone_447_aK0	clonotype1306aKO	1	TRB:CASSIWGREQYF;TRA:CAIDIGYAQGLTF
clone_448_aK0	clonotype1307aKO	1	TRB:CASSAGDDTQYF;TRA:CATDYAQGLTF
clone_449_aK0	clonotype1308aKO	1	TRB:CASSPQLSGNTLYF;TRA:CALVNNAGAKLTF
clone_450_aK0	clonotype1309aKO	1	TRB:CASSLGTGGYEQYF;TRA:CALADTNAYKVIF
clone_451_aK0	clonotype1310aKO	1	TRB:CASSGWGGQNTLYF;TRA:CALETSSNNRIFF
clone_452_aK0	clonotype1311aKO	1	TRB:CASSLGQSSYEQYF;TRA:CAARNTGKLIF
clone_453_aK0	clonotype1312aKO	1	TRB:CASSLGNSGNTLYF;TRA:CAIDPTNAYKVIF
clone_454_aK0	clonotype1314aKO	1	TRB:CASSPSRGGNTLYF;TRA:CAMGRNNNNAPRF
clone_455_aK0	clonotype1315aKO	1	TRB:CASGDYRGYSGNTLYF;TRB:CASSADWVNQDTQYF;TRA:CALGSSGSWQLIF;TRA:CAMERSQGGRALIF
clone_456_aK0	clonotype1317aKO	1	TRB:CASSSTGGNSDYTF;TRA:CAVDRGSALGRLHF
clone_457_aK0	clonotype1318aKO	1	TRB:CASSLGGRRDTQYF;TRA:CAGRYNQGKLIF
clone_458_aK0	clonotype1319aKO	1	TRB:CASSLGQPNTEVFF;TRA:CALMDSNYQLIW;TRA:CAMREGHYNQGKLIF
clone_459_aK0	clonotype1320aKO	1	TRB:CASRGLGGPETLYF;TRA:CAARYGNEKITF
clone_460_aK0	clonotype1324aKO	1	TRB:CASRPTGERLFF;TRA:CAALSSGSWQLIF
clone_461_aK0	clonotype1325aKO	1	TRB:CASSSGVSNTGQLYF;TRA:CAASLNSGTYQRF
clone_462_aK0	clonotype1326aKO	1	TRB:CASSQEQGAGAETLYF;TRA:CAVGDTNAYKVIF
clone_463_aK0	clonotype1327aKO	1	TRB:CASSPGTLYAEQFF;TRA:CAVRAGGNNKLTF
clone_464_aK0	clonotype1328aKO	1	TRB:CASSAGQGNERLFF;TRA:CAAGRGNSAGNKLTF
clone_465_aK0	clonotype1329aKO	1	TRB:CASSGDWGENTLYF;TRA:CAVSMTGGYKVVF
clone_466_aK0	clonotype1331aKO	1	TRB:CASSFGGNQDTQYF;TRA:CAVSGNNNAPRF
clone_467_aK0	clonotype1332aKO	1	TRB:CASSPQGNQDTQYF;TRA:CAMVAATGGNNKLTF
clone_468_aK0	clonotype1333aKO	1	TRB:CASSSRDRNTEVFF;TRA:CAASPQGGRALIF
clone_469_aK0	clonotype1334aKO	1	TRB:CASSSTGLQDTQYF;TRA:CAATSGGNYKPTF
clone_470_aK0	clonotype1335aKO	1	TRB:CASSPPGQGTTLYF;TRA:CALSNYQLIW
clone_471_aK0	clonotype1336aKO	1	TRB:CASSPGHNNQAPLF;TRA:CAASGQGGRALIF;TRA:CAVSGGQGGRALIF
clone_472_aK0	clonotype1337aKO	1	TRB:CASSLAGTVTEVFF;TRA:CAASYQGGRALIF
clone_473_aK0	clonotype1338aKO	1	TRB:CASSLKGVQNTLYF;TRA:CALNSNNRIFF
clone_474_aK0	clonotype1339aKO	1	TRB:CASSGWPGGDGQDTQYF;TRA:CAVSITGNYKYVF
clone_475_aK0	clonotype133aKO	1	TRB:CGASPGNSDYTF;TRA:CAVSGFWANKMIF
clone_476_aK0	clonotype1340aKO	1	TRB:CASSPTGGWNSPLYF;TRA:CAVRDTNAYKVIF
clone_477_aK0	clonotype1341aKO	1	TRB:CASSAGLANYAEQFF;TRA:CAVSARGNYKPTF
clone_478_aK0	clonotype1343aKO	1	TRB:CASSWLGGRKDTQYF;TRA:CAVATSSGQKLVF
clone_479_aK0	clonotype1344aKO	1	TRB:CSSSQQGSGNTLYF;TRA:CAMRVLTSGGNYKPTF;TRA:CAVSENSGTYQRF
clone_480_aK0	clonotype1345aKO	1	TRB:CTCSAAANSDYTF;TRA:CAALNSGGSNYKLTF
clone_481_aK0	clonotype1346aKO	1	TRB:CASSSGQGANTEVFF;TRA:CALRAGTGGYKVVF
clone_482_aK0	clonotype1347aKO	1	TRB:CAWSLELGNIGDERLFF;TRA:CAARVSGSFNKLTF
clone_483_aK0	clonotype1348aKO	1	TRB:CAWSLGTGGANTGQLYF;TRA:CALGEDRLTL
clone_484_aK0	clonotype134aKO	1	TRB:CGAREGYSDYTF;TRA:CAIDYQGGRALIF
clone_485_aK0	clonotype1350aKO	1	TRB:CASSSDNSGNTLYF;TRA:CAASPNTNKVVF
clone_486_aK0	clonotype1351aKO	1	TRB:CASSSGISGNTLYF;TRA:CVLRPSNYNVLYF
clone_487_aK0	clonotype1352aKO	1	TRB:CASSLGGSQNTLYF;TRB:CASSSSAGAETLYF;TRA:CAVSMDSNYQLIW
clone_488_aK0	clonotype1353aKO	1	TRB:CASSLGLGGDTQYF;TRA:CAVSAYQGGRALIF
clone_489_aK0	clonotype1354aKO	1	TRB:CASSFRGGDERLFF;TRB:CASSQEGQNSYNSPLYF;TRA:CAVGGNYNVLYF
clone_490_aK0	clonotype1355aKO	1	TRB:CASSRGGTGGYEQYF;TRA:CAATSSNMGYKLTF
clone_491_aK0	clonotype1356aKO	1	TRB:CASSPKGVTGQLYF;TRA:CVLSATGNYKYVF
clone_492_aK0	clonotype1357aKO	1	TRB:CASGAWGNYAEQFF;TRB:CASSPDRGNQAPLF;TRA:CATDAGTGGYKVVF
clone_493_aK0	clonotype1358aKO	1	TRB:CASSAGTANTEVFF;TRA:CAASKAGNTGKLIF
clone_494_aK0	clonotype1359aKO	1	TRB:CASSLEGGRDTQYF;TRA:CAMSRTGSGGKLTL
clone_495_aK0	clonotype135aKO	1	TRB:CASSDWGGANTQYF;TRB:CSSTGSSYEQYF;TRA:CALGETTNAYKVIF
clone_496_aK0	clonotype1360aKO	1	TRB:CASSLGGGVYEQYF;TRA:CAVSLTGNTGKLIF
clone_497_aK0	clonotype1361aKO	1	TRB:CASSLPGAGNTLYF;TRA:CAVSGTASLGKLQF
clone_498_aK0	clonotype1363aKO	1	TRB:CASSPGTANTEVFF;TRA:CALTGSGGKLTL
clone_499_aK0	clonotype1365aKO	1	TRB:CASGDRLGGGSYEQYF;TRA:CVLSGSSNNRIFF
clone_500_aK0	clonotype1367aKO	1	TRB:CASSQDWQNNQAPLF;TRA:CVLSVYNQGKLIF
clone_501_aK0	clonotype1368aKO	1	TRB:CASSMGRNTLYF;TRA:CAVSMASSSFSKLVF
clone_502_aK0	clonotype1369aKO	1	TRB:CASSSGGSYNSPLYF;TRA:CVVASSSFSKLVF
clone_503_aK0	clonotype1370aKO	1	TRB:CASSQDRPGSNERLFF;TRA:CAVSNTGNYKYVF
clone_504_aK0	clonotype1371aKO	1	TRB:CASSLNWGAFSYEQYF;TRA:CAASVRGNNKLTF
clone_505_aK0	clonotype1372aKO	1	TRB:CASSNWGNYAEQFF;TRA:CAASRNSNNRIFF
clone_506_aK0	clonotype1373aKO	1	TRB:CASSQGTFQDTQYF;TRA:CAARGYNQGKLIF
clone_507_aK0	clonotype1374aKO	1	TRB:CASSQTGGPETLYF;TRA:CVLSAGTGGYKVVF
clone_508_aK0	clonotype1375aKO	1	TRB:CASSGGTGDAEQFF;TRA:CAVSASTASLGKLQF
clone_509_aK0	clonotype1376aKO	1	TRB:CASSLGDWGVEQFF;TRA:CAVSRGTQVVGQLTF
clone_510_aK0	clonotype1377aKO	1	TRB:CASSRDSGNQDTQYF;TRA:CAASGPNTGKLTF
clone_511_aK0	clonotype1379aKO	1	TRB:CASSPWGADAEQFF;TRA:CAVSAAEGADRLTF
clone_512_aK0	clonotype137aKO	1	TRB:CASGDTGGNYAEQFF;TRB:CASSRQNTEVFF;TRA:CAMRERDNYAQGLTF;TRA:CAVRHMATGGNNKLTF
clone_513_aK0	clonotype1381aKO	1	TRB:CASSDGWGGNQNTLYF;TRA:CAASNYNQGKLIF
clone_514_aK0	clonotype1382aKO	1	TRB:CASGDVWGGSQNTLYF;TRA:CALGASSGSWQLIF
clone_515_aK0	clonotype1383aKO	1	TRB:CASSQDPQGQDTQYF;TRA:CASSNMGYKLTF
clone_516_aK0	clonotype1384aKO	1	TRB:CASSYRTGGGERLFF;TRA:CAASEGNNYAQGLTF
clone_517_aK0	clonotype1385aKO	1	TRB:CASSLDRGRQNTLYF;TRA:CALSDPGNNRIFF
clone_518_aK0	clonotype1386aKO	1	TRB:CTCSAERQNTLYF;TRA:CVLSDASGSWQLIF
clone_519_aK0	clonotype1387aKO	1	TRB:CTCSADPNTEVFF;TRA:CAASEQGYNQGKLIF
clone_520_aK0	clonotype1388aKO	1	TRB:CTCSAGSQNTLYF;TRA:CAVSTASSGSWQLIF
clone_521_aK0	clonotype1389aKO	1	TRB:CASRTGGIDAETLYF;TRA:CALSNTNTGKLTF
clone_522_aK0	clonotype1390aKO	1	TRB:CASSLSGTDNQAPLF;TRA:CALLSSNTNKVVF
clone_523_aK0	clonotype1391aKO	1	TRB:CASSQSPQGGQDTQYF;TRA:CAMEHYNQGKLIF
clone_524_aK0	clonotype1392aKO	1	TRB:CASSQERGTGNERLFF;TRA:CAVRYTEGADRLTF
clone_525_aK0	clonotype1393aKO	1	TRB:CASSQARTGSAETLYF;TRA:CAVRWTLSGSFNKLTF
clone_526_aK0	clonotype1396aKO	1	TRB:CASSRDRQNYAEQFF;TRA:CAVRYNTNTGKLTF
clone_527_aK0	clonotype1397aKO	1	TRB:CASSHRGDTGQLYF;TRA:CALSDRGSWQLIF
clone_528_aK0	clonotype1398aKO	1	TRB:CASSPPPSQNTLYF;TRA:CALSGQGTGSKLSF
clone_529_aK0	clonotype1399aKO	1	TRB:CASSPTGANTEVFF;TRA:CAVEPGTGSNRLTF
clone_530_aK0	clonotype1400aKO	1	TRB:CASSPTGAYAEQFF;TRA:CAAGIDRGSALGRLHF
clone_531_aK0	clonotype1401aKO	1	TRB:CASSSGLGVDTQYF;TRA:CAASSMDSNYQLIW
clone_532_aK0	clonotype1402aKO	1	TRB:CASSLDETNQAPLF;TRA:CALSPGTGGYKVVF
clone_533_aK0	clonotype1403aKO	1	TRB:CASRKTTIQDTQYF;TRA:CALSHRNNYAQGLTF
clone_534_aK0	clonotype1404aKO	1	TRB:CASSPTGEGSPLYF;TRA:CALPGTGGYKVVF
clone_535_aK0	clonotype1405aKO	1	TRB:CASSFGQNYAEQFF;TRA:CALSDPNYAQGLTF
clone_536_aK0	clonotype1407aKO	1	TRB:CTCSADSLYEQYF;TRA:CALTDTNAYKVIF
clone_537_aK0	clonotype1408aKO	1	TRB:CASSSGDGEPSDYTF;TRA:CAMREDSGTYQRF
clone_538_aK0	clonotype1409aKO	1	TRB:CASSLGNLNQDTQYF;TRA:CALSGTSSGQKLVF
clone_539_aK0	clonotype1410aKO	1	TRB:CASSQEDRKNYAEQFF;TRA:CALSRTSSGQKLVF
clone_540_aK0	clonotype1411aKO	1	TRB:CASSFRTGANTGQLYF;TRB:CASSSTGGAETLYF;TRA:CALSDQTNAYKVIF;TRA:CALSDRYSNNRLTL
clone_541_aK0	clonotype1412aKO	1	TRB:CASSLRQGAGQLYF;TRA:CAMDSDTNAYKVIF
clone_542_aK0	clonotype1413aKO	1	TRB:CASSLELGQDTQYF;TRA:CAVRKETGNTGKLIF
clone_543_aK0	clonotype1415aKO	1	TRB:CASSFPGGDYEQYF;TRA:CALGDAGSWQLIF
clone_544_aK0	clonotype1416aKO	1	TRB:CASRSTDSGNTLYF;TRA:CASLSGSFNKLTF
clone_545_aK0	clonotype1417aKO	1	TRB:CASSDTGGLNYAEQFF;TRA:CAMRFDSGYNKLTF
clone_546_aK0	clonotype1420aKO	1	TRB:CASSSGGSYNSPLYF;TRA:CALGRNTNTGKLTF
clone_547_aK0	clonotype1421aKO	1	TRB:CASSLVGGGDTQYF;TRA:CALESSGGSNYKLTF
clone_548_aK0	clonotype1422aKO	1	TRB:CASRDWGGYAEQFF;TRA:CAMREGYNQGKLIF
clone_549_aK0	clonotype1425aKO	1	TRB:CASSLAGAQDTQYF;TRA:CAASITGNTGKLIF;TRA:CALVVPLISNTNKVVF
clone_550_aK0	clonotype1426aKO	1	TRB:CASSLGQGAAEVFF;TRA:CAMRATGFASALTF
clone_551_aK0	clonotype1427aKO	1	TRB:CASSDNRDWGGNAEQFF;TRA:CALSDRASSGSWQLIF
clone_552_aK0	clonotype1428aKO	1	TRB:CASSQGTGGYAEQFF;TRA:CAGAGNTGKLIF
clone_553_aK0	clonotype1429aKO	1	TRB:CASSFLNSGNTLYF;TRA:CAMREGMDSGYNKLTF
clone_554_aK0	clonotype1430aKO	1	TRB:CASSLVWGTYEQYF;TRA:CAASGGGRALIF
clone_555_aK0	clonotype1431aKO	1	TRB:CASSDSDWGGAYAEQFF;TRA:CALHTNAYKVIF
clone_556_aK0	clonotype1432aKO	1	TRB:CASSQPGGAEDTQYF;TRA:CAASARNNRIFF
clone_557_aK0	clonotype1433aKO	1	TRB:CASSFGQGDTEVFF;TRA:CAASGNSGTYQRF
clone_558_aK0	clonotype1434aKO	1	TRB:CASSDNRGQGAETLYF;TRA:CAASVNSNNRIFF
clone_559_aK0	clonotype1435aKO	1	TRB:CASSRQGPNTGQLYF;TRA:CAASGNMGYKLTF
clone_560_aK0	clonotype1436aKO	1	TRB:CASSRLDNSYNSPLYF;TRA:CAASGSSGNKLIF
clone_561_aK0	clonotype1438aKO	1	TRB:CASSLSRDIYEQYF;TRA:CAASATSSGQKLVF
clone_562_aK0	clonotype1439aKO	1	TRB:CASRTGGFSNERLFF;TRA:CAASGNSGTYQRF
clone_563_aK0	clonotype1441aKO	1	TRB:CASSLTRDNSPLYF;TRA:CAARTGNTGKLIF
clone_564_aK0	clonotype1442aKO	1	TRB:CTCSAGSTGQLYF;TRA:CAASFGANTGKLTF
clone_565_aK0	clonotype1443aKO	1	TRB:CASSLDGGGNTLYF;TRA:CAASANYGNEKITF
clone_566_aK0	clonotype1444aKO	1	TRB:CASSLEGGWAEQFF;TRA:CAASDNYGNEKITF
clone_567_aK0	clonotype1445aKO	1	TRB:CASSLKGYTGQLYF;TRB:CTCSADGGYAEQFF;TRA:CAASINTGNYKYVF;TRA:CALSEAGYQNFYF
clone_568_aK0	clonotype1446aKO	1	TRB:CASSWDWGGFYEQYF;TRA:CAASLPGTGSNRLTF
clone_569_aK0	clonotype1447aKO	1	TRB:CTCTRVGNTEVFF;TRA:CAASGSGGSNYKLTF
clone_570_aK0	clonotype1449aKO	1	TRB:CASSLGVSGNTLYF;TRA:CAASANTGANTGKLTF
clone_571_aK0	clonotype1450aKO	1	TRB:CASSNDRGQNTLYF;TRA:CALSELISGSFNKLTF
clone_572_aK0	clonotype1451aKO	1	TRB:CASSLADTYAEQFF;TRA:CALTNYGNEKITF
clone_573_aK0	clonotype1452aKO	1	TRB:CASSLRGQGDTQYF;TRB:CASSSTGGASAETLYF;TRA:CALSANYNQGKLIF
clone_574_aK0	clonotype1453aKO	1	TRB:CASSQSGGGNTEVFF;TRA:CALAPQGTGSKLSF
clone_575_aK0	clonotype1454aKO	1	TRA:CAARGAGSFNKLTF
clone_576_aK0	clonotype1455aKO	1	TRA:CAARGAGSFNKLTF
clone_577_aK0	clonotype1456aKO	1	TRA:CAASEHGGSALGRLHF
clone_578_aK0	clonotype1457aKO	1	TRA:CAASEHGGSALGRLHF
clone_579_aK0	clonotype1458aKO	1	TRA:CAVSIWYGSSGNKLIF
clone_580_aK0	clonotype1459aKO	1	TRB:CASSTRAGNTLYF
clone_581_aK0	clonotype1460aKO	1	TRB:CASSTGQGTEVFF
clone_582_aK0	clonotype1461aKO	1	TRB:CASSIAWGYEQYF
clone_583_aK0	clonotype1462aKO	1	TRB:CASSIGIGSDYTF
clone_584_aK0	clonotype1464aKO	1	TRB:CASSPGHNTEVFF
clone_585_aK0	clonotype1465aKO	1	TRB:CASSGGAGNTLYF
clone_586_aK0	clonotype1466aKO	1	TRB:CASSSGNYAEQFF
clone_587_aK0	clonotype1467aKO	1	TRB:CASSLGHLYEQYF
clone_588_aK0	clonotype1468aKO	1	TRB:CASIHGTGREVFF
clone_589_aK0	clonotype1469aKO	1	TRA:CAVSANNYAQGLTF
clone_590_aK0	clonotype146aKO	1	TRB:CASSQEQGGSDYTF;TRA:CAPGTNAYKVIF
clone_591_aK0	clonotype1470aKO	1	TRB:CASSPSGTGVNSPLYF
clone_592_aK0	clonotype1471aKO	1	TRB:CASSQERGASNTGQLYF
clone_593_aK0	clonotype1472aKO	1	TRB:CASSQDLGGRGQNTLYF
clone_594_aK0	clonotype1473aKO	1	TRB:CASSQDLGGRGQNTLYF
clone_595_aK0	clonotype1474aKO	1	TRA:CAVTPNTGANTGKLTF
clone_596_aK0	clonotype1475aKO	1	TRA:CALRKNNNNAPRF
clone_597_aK0	clonotype1476aKO	1	TRA:CALLTQVVGQLTF
clone_598_aK0	clonotype1477aKO	1	TRA:CALGEAEGADRLTF
clone_599_aK0	clonotype1479aKO	1	TRB:CASSPQTGGALGQYF
clone_600_aK0	clonotype147aKO	1	TRB:CASGDHWGSAETLYF;TRB:CASSQDQGGTEVFF;TRA:CAASANTGYQNFYF
clone_601_aK0	clonotype1480aKO	1	TRB:CASSPGQGRNTEVFF
clone_602_aK0	clonotype1481aKO	1	TRB:CASSPGGAGQNTLYF
clone_603_aK0	clonotype1482aKO	1	TRB:CASSEDWGGAGTQYF
clone_604_aK0	clonotype1483aKO	1	TRB:CASSGTGGSAETLYF
clone_605_aK0	clonotype1484aKO	1	TRB:CASSSGLGGLYEQYF
clone_606_aK0	clonotype1485aKO	1	TRB:CASSLLGGAAETLYF
clone_607_aK0	clonotype1486aKO	1	TRB:CASSLELGGLAEQFF
clone_608_aK0	clonotype1488aKO	1	TRB:CASSLGTGSGNTLYF
clone_609_aK0	clonotype1489aKO	1	TRB:CASSLVQGNYAEQFF
clone_610_aK0	clonotype148aKO	1	TRB:CASSRLNQDTQYF;TRA:CAIRGGYQNFYF
clone_611_aK0	clonotype1490aKO	1	TRB:CASSLSGENYAEQFF
clone_612_aK0	clonotype1491aKO	1	TRB:CASSLWGGAQNTLYF
clone_613_aK0	clonotype1492aKO	1	TRB:CASSFLDNSGNTLYF
clone_614_aK0	clonotype1493aKO	1	TRB:CASSFGGGRAETLYF
clone_615_aK0	clonotype1495aKO	1	TRB:CASSLGQGAGNTLYF
clone_616_aK0	clonotype1496aKO	1	TRB:CASSFNWGNYAEQFF
clone_617_aK0	clonotype1497aKO	1	TRB:CASSFAGAGTGQLYF
clone_618_aK0	clonotype1498aKO	1	TRB:CASSFAGAGTGQLYF
clone_619_aK0	clonotype1499aKO	1	TRB:CASSRGGGISGNTLYF
clone_620_aK0	clonotype1500aKO	1	TRB:CASSPDWGSSYEQYF
clone_621_aK0	clonotype1501aKO	1	TRB:CASSSGQGGQNTLYF
clone_622_aK0	clonotype1502aKO	1	TRB:CASSLEGGGGDTQYF
clone_623_aK0	clonotype1503aKO	1	TRB:CASSLDWGQNQAPLF
clone_624_aK0	clonotype1504aKO	1	TRB:CASSLDWGQNQAPLF
clone_625_aK0	clonotype1505aKO	1	TRB:CASSLAGGRDTEVFF
clone_626_aK0	clonotype1506aKO	1	TRB:CASSLAGGRDTEVFF
clone_627_aK0	clonotype1507aKO	1	TRB:CASSLVGGRAETLYF
clone_628_aK0	clonotype1508aKO	1	TRB:CASSLSGGNYAEQFF
clone_629_aK0	clonotype1509aKO	1	TRB:CASSFTGTGEWTLYF
clone_630_aK0	clonotype150aKO	1	TRB:CASSFSGDEQYF;TRA:CAVRAANTGKLTF
clone_631_aK0	clonotype1510aKO	1	TRB:CASSFTGTGEWTLYF
clone_632_aK0	clonotype1511aKO	1	TRB:CASSFTGTGEWTLYF
clone_633_aK0	clonotype1512aKO	1	TRB:CASSFGTASQNTLYF
clone_634_aK0	clonotype1513aKO	1	TRB:CASSLEGGGSYEQYF
clone_635_aK0	clonotype1514aKO	1	TRB:CASSLYQGSNSDYTF
clone_636_aK0	clonotype1515aKO	1	TRB:CASSRDWGPSYEQYF
clone_637_aK0	clonotype1517aKO	1	TRB:CASSRTGGYNSPLYF
clone_638_aK0	clonotype1518aKO	1	TRB:CASSFLRGDQDTQYF
clone_639_aK0	clonotype1519aKO	1	TRB:CASSFGTDSNERLFF
clone_640_aK0	clonotype1520aKO	1	TRB:CASSFSGTGNERLFF
clone_641_aK0	clonotype1521aKO	1	TRB:CASSFSGTGNERLFF
clone_642_aK0	clonotype1522aKO	1	TRB:CASSFFGGGYAEQFF
clone_643_aK0	clonotype1523aKO	1	TRB:CASSLGGTGYAEQFF
clone_644_aK0	clonotype1524aKO	1	TRB:CASSPAGTSQNTLYF
clone_645_aK0	clonotype1525aKO	1	TRB:CASSLDRNSQNTLYF
clone_646_aK0	clonotype1526aKO	1	TRB:CASSLDRLNYAEQFF
clone_647_aK0	clonotype1527aKO	1	TRB:CASSLAPGLGVEQYF
clone_648_aK0	clonotype1528aKO	1	TRB:CASSLGGSSQNTLYF
clone_649_aK0	clonotype1529aKO	1	TRB:CASGDARTGGAHAEQFF
clone_650_aK0	clonotype152aKO	1	TRB:CASRDISYNSPLYF;TRA:CAVRNYGSSGNKLIF
clone_651_aK0	clonotype1530aKO	1	TRB:CASSQTGAGGQNTLYF
clone_652_aK0	clonotype1531aKO	1	TRB:CASSQDGGHSAETLYF
clone_653_aK0	clonotype1532aKO	1	TRB:CSSSQSVTANTEVFF
clone_654_aK0	clonotype1534aKO	1	TRB:CTCRPTGHTGQLYF
clone_655_aK0	clonotype1535aKO	1	TRB:CTCSDRGTNERLFF
clone_656_aK0	clonotype1537aKO	1	TRB:CTCSARGGAAEQFF
clone_657_aK0	clonotype1539aKO	1	TRB:CTCSADKSNTEVFF
clone_658_aK0	clonotype1540aKO	1	TRB:CTCSADRANTEVFF
clone_659_aK0	clonotype1541aKO	1	TRB:CTCSADGYNQAPLF
clone_660_aK0	clonotype1542aKO	1	TRB:CTCSADQRGERLFF
clone_661_aK0	clonotype1543aKO	1	TRB:CTCSADLGGYEQYF
clone_662_aK0	clonotype1544aKO	1	TRB:CTCSADVRGQAPLF
clone_663_aK0	clonotype1545aKO	1	TRB:CTCSADLYNQAPLF
clone_664_aK0	clonotype1546aKO	1	TRB:CTCSAAGGNYEQYF
clone_665_aK0	clonotype1547aKO	1	TRB:CTCSAGQGAYEQYF
clone_666_aK0	clonotype1548aKO	1	TRB:CTCSAGDISYEQYF
clone_667_aK0	clonotype1549aKO	1	TRB:CTCSAVTGGREQYF
clone_668_aK0	clonotype154aKO	1	TRB:CASGEGWGAAEQFF;TRA:CALGSSGSWQLIF
clone_669_aK0	clonotype1550aKO	1	TRB:CTCSAVTGGREQYF
clone_670_aK0	clonotype1551aKO	1	TRB:CTCSARQGKNTLYF
clone_671_aK0	clonotype1552aKO	1	TRB:CTCSARTGGYEQYF
clone_672_aK0	clonotype1553aKO	1	TRB:CTCSAGTNNQAPLF
clone_673_aK0	clonotype1554aKO	1	TRB:CTCSAGQSSYEQYF
clone_674_aK0	clonotype1555aKO	1	TRB:CTCSGTTNTGQLYF
clone_675_aK0	clonotype1557aKO	1	TRB:CTCSGDRNYAEQFF
clone_676_aK0	clonotype1558aKO	1	TRB:CTCSGGQKNTEVFF
clone_677_aK0	clonotype1559aKO	1	TRB:CTCSVGGRYAEQFF
clone_678_aK0	clonotype1560aKO	1	TRB:CTCSVGGRYAEQFF
clone_679_aK0	clonotype1561aKO	1	TRB:CTCSSGQNYAEQFF
clone_680_aK0	clonotype1562aKO	1	TRB:CASSPGTGGQDTQYF;TRA:CILRDYANKMIF
clone_681_aK0	clonotype1564aKO	1	TRB:CTCSRTGDTGQLYF;TRA:CILITNTGKLTF
clone_682_aK0	clonotype1565aKO	1	TRB:CASSRDWGDAETLYF;TRA:CATVSSNTNKVVF
clone_683_aK0	clonotype1567aKO	1	TRB:CTCSGTGGAETLYF;TRA:CAPPDYSNNRLTL;TRA:CAVSSGTGGYKVVF
clone_684_aK0	clonotype1569aKO	1	TRB:CASSLEGISNERLFF;TRA:CAASNYGNEKITF
clone_685_aK0	clonotype1570aKO	1	TRB:CASSLRDRGFSDYTF;TRA:CAIVRTGGYKVVF
clone_686_aK0	clonotype1572aKO	1	TRB:CASSSVGGGAGEQYF;TRA:CILRVAQGGSAKLIF
clone_687_aK0	clonotype1573aKO	1	TRB:CASSLAQGGNTEVFF;TRA:CATDARGNTGKLIF
clone_688_aK0	clonotype1574aKO	1	TRB:CASGDGLGGNYAEQFF;TRB:CASSLGDRTYAEQFF;TRA:CAASTSSGQKLVF
clone_689_aK0	clonotype1575aKO	1	TRB:CASSFLGGSYAEQFF;TRA:CAAETRGNYKPTF
clone_690_aK0	clonotype1576aKO	1	TRB:CTCSARSANTEVFF;TRA:CAAHRNSNNRIFF
clone_691_aK0	clonotype1577aKO	1	TRB:CTCSGRDSNQAPLF;TRA:CASFSGGNYKPTF
clone_692_aK0	clonotype1578aKO	1	TRB:CASTRTTNSDYTF;TRB:CTCSDQTVSNERLFF;TRA:CAAEEGSALGRLHF;TRA:CALIGQGGRALIF
clone_693_aK0	clonotype1579aKO	1	TRB:CASSAGVYAEQFF;TRB:CTCSAEGQDSNERLFF;TRA:CAARTNTGKLTF
clone_694_aK0	clonotype1580aKO	1	TRB:CASSFDSNERLFF;TRA:CAANTNTGKLTF
clone_695_aK0	clonotype1581aKO	1	TRB:CASSHDRGLNERLFF;TRA:CAIVRGSALGRLHF
clone_696_aK0	clonotype1582aKO	1	TRB:CASSPRDRAPERLFF;TRA:CALAGAGNTGKLIF
clone_697_aK0	clonotype1583aKO	1	TRB:CASSSRLGGRDTQYF;TRA:CAVNYSNNRLTL
clone_698_aK0	clonotype1584aKO	1	TRB:CASSPPLGGPNTLYF;TRA:CALERNTGYQNFYF
clone_699_aK0	clonotype1585aKO	1	TRB:CASSLRKGTSERLFF;TRA:CAASPNTGKLTF
clone_700_aK0	clonotype1586aKO	1	TRB:CASSLDGDWGYEQYF;TRA:CAVSNNNNAPRF
clone_701_aK0	clonotype1587aKO	1	TRB:CASSLESGDNSPLYF;TRA:CAAPLAGNTGKLIF
clone_702_aK0	clonotype1589aKO	1	TRB:CTCSAWGPSAEQFF;TRA:CAMERSTGYQNFYF
clone_703_aK0	clonotype158aKO	1	TRB:CASSQDGRANTEVFF;TRA:CALGGGNNRIFF
clone_704_aK0	clonotype1590aKO	1	TRB:CASIRENYAEQFF;TRA:CAVMSSGSWQLIF
clone_705_aK0	clonotype1591aKO	1	TRB:CASSQEGTGGAQDTQYF;TRA:CVLGDTGGYKVVF
clone_706_aK0	clonotype1594aKO	1	TRB:CASSLGWGSAETLYF;TRA:CAAEVGGGSNAKLTF
clone_707_aK0	clonotype1595aKO	1	TRB:CASSLGGVNYAEQFF;TRA:CALSGYSNNRLTL
clone_708_aK0	clonotype1596aKO	1	TRB:CTCSAKSSAETLYF;TRA:CAATYANKMIF
clone_709_aK0	clonotype1597aKO	1	TRB:CASSMGENTEVFF;TRA:CAARNTGSGGKLTL
clone_710_aK0	clonotype1598aKO	1	TRB:CASSMGGSYEQYF;TRA:CALSDDMGYKLTF;TRA:CAVLTSGGNYKPTF
clone_711_aK0	clonotype1599aKO	1	TRB:CASSPRTEGQNTLYF;TRA:CALSDRPGYNKLTF
clone_712_aK0	clonotype1600aKO	1	TRB:CASSRQGASQNTLYF;TRA:CAASRVNYAQGLTF
clone_713_aK0	clonotype1601aKO	1	TRB:CASSLALGGLYEQYF;TRA:CAARNYAQGLTF
clone_714_aK0	clonotype1604aKO	1	TRB:CASSLGTGRNTEVFF;TRA:CATDAGNMGYKLTF
clone_715_aK0	clonotype1605aKO	1	TRB:CASSWDWGNYAEQFF;TRA:CVLGDHSAGNKLTF
clone_716_aK0	clonotype1606aKO	1	TRB:CASSLRQGGAETLYF;TRA:CALGDEGRALIF
clone_717_aK0	clonotype1607aKO	1	TRB:CASRTGGANTGQLYF;TRA:CAASMCAQGLTF
clone_718_aK0	clonotype1609aKO	1	TRB:CASSPRDWGVNQDTQYF;TRA:CAASYSNYQLIW
clone_719_aK0	clonotype1610aKO	1	TRB:CSSSQSAQYNSPLYF;TRA:CAVRSSNNRIFF
clone_720_aK0	clonotype1611aKO	1	TRB:CTCSAVSYNSPLYF;TRA:CAVPDYSNNRLTL;TRA:CAVSMNQGGRALIF
clone_721_aK0	clonotype1612aKO	1	TRB:CTCSAQGGNERLFF;TRA:CAASASSGSWQLIF
clone_722_aK0	clonotype1613aKO	1	TRB:CASNRGWQNTLYF;TRA:CAVSSGGSNYKLTF
clone_723_aK0	clonotype1614aKO	1	TRB:CASSPGTGGRGTEVFF;TRA:CAVSDNSGTYQRF
clone_724_aK0	clonotype1615aKO	1	TRB:CASSQDFGTFSNERLFF;TRA:CALFRGGRALIF
clone_725_aK0	clonotype1616aKO	1	TRB:CASSLGQGGNERLFF;TRA:CATDNGNYNQGKLIF
clone_726_aK0	clonotype1617aKO	1	TRB:CASSWGGSNTGQLYF;TRA:CALSPNSGTYQRF
clone_727_aK0	clonotype1618aKO	1	TRB:CASSPSGTLNSDYTF;TRA:CAVSASNTNKVVF
clone_728_aK0	clonotype1620aKO	1	TRB:CASSPRDNSGNTLYF;TRA:CAASDTGSSGNKLIF;TRA:CALASSNTNKVVF
clone_729_aK0	clonotype1621aKO	1	TRB:CASSLSGQSNERLFF;TRA:CAVSRYSNNRLTL
clone_730_aK0	clonotype1622aKO	1	TRB:CASSLSWGGYAEQFF;TRA:CAATRNNNNAPRF;TRA:CALGPNTNTGKLTF
clone_731_aK0	clonotype1623aKO	1	TRB:CASSSTGGAREETLYF;TRA:CALSDQDNMGYKLTF
clone_732_aK0	clonotype1624aKO	1	TRB:CTCSADLSNSDYTF;TRA:CSASKNSGTYQRF
clone_733_aK0	clonotype1626aKO	1	TRB:CTCSAQFSNERLFF;TRA:CAASGGSNYQLIW
clone_734_aK0	clonotype1627aKO	1	TRB:CASSIWGPYEQYF;TRA:CAASETVSSGSWQLIF
clone_735_aK0	clonotype1628aKO	1	TRB:CASSRDSQNTLYF;TRA:CATKRANVGDNSKLIW
clone_736_aK0	clonotype1629aKO	1	TRB:CASSWDRGPGNTLYF;TRA:CAASGNYNQGKLIF
clone_737_aK0	clonotype1630aKO	1	TRB:CASSLRQTSQNTLYF;TRA:CALSEDQGGRALIF
clone_738_aK0	clonotype1631aKO	1	TRB:CASSLPDRAGNTLYF;TRA:CALGNYNQGKLIF
clone_739_aK0	clonotype1632aKO	1	TRB:CASRAGDNTGQLYF;TRB:CASTPTGGAQDTQYF;TRA:CALSDYYAQGLTF
clone_740_aK0	clonotype1633aKO	1	TRB:CASSLSQGAAETLYF;TRA:CAASGNNYAQGLTF
clone_741_aK0	clonotype1634aKO	1	TRB:CASSRTGGYNSPLYF;TRA:CAMRDTNAYKVIF
clone_742_aK0	clonotype1635aKO	1	TRB:CASSTGTGGAYSDYTF;TRA:CAVRFPNYGNEKITF
clone_743_aK0	clonotype1636aKO	1	TRB:CTCSARGGAAEQFF;TRA:CALSIWDSAGNKLTF
clone_744_aK0	clonotype1637aKO	1	TRB:CTCSADKRNTEVFF;TRA:CAMREDSNYQLIW
clone_745_aK0	clonotype1638aKO	1	TRB:CASSLNDRGQAEQFF;TRA:CALSDNYNQGKLIF
clone_746_aK0	clonotype1639aKO	1	TRB:CASSLEGGGQNTLYF;TRA:CAVSAAWNSNNRIFF
clone_747_aK0	clonotype1640aKO	1	TRB:CASSLGLGSSYEQYF;TRA:CALSVPGSGGKLTL
clone_748_aK0	clonotype1641aKO	1	TRB:CASSLGRRSQNTLYF;TRA:CAVSARGSALGRLHF
clone_749_aK0	clonotype1642aKO	1	TRB:CASSRTGGYNSPLYF;TRA:CAMRDTNAYKVIF
clone_750_aK0	clonotype1643aKO	1	TRB:CASSFSGTGGDTQYF;TRA:CALSDNYNQGKLIF
clone_751_aK0	clonotype1644aKO	1	TRB:CASSTDWPSQNTLYF;TRA:CALRITGNTGKLIF
clone_752_aK0	clonotype1647aKO	1	TRB:CASSPWGSNYAEQFF;TRA:CALGDRATGGNNKLTF
clone_753_aK0	clonotype1648aKO	1	TRB:CASSLNLGGYAEQFF;TRA:CALGDLSTQVVGQLTF
clone_754_aK0	clonotype1649aKO	1	TRB:CASSLAGGAPETLYF;TRA:CAMREGYNQGKLIF
clone_755_aK0	clonotype1650aKO	1	TRB:CASSLELGEGSEQYF;TRA:CALGENTGGLSGKLTF
clone_756_aK0	clonotype1651aKO	1	TRB:CASSLGDWGGNTLYF;TRA:CAMRGDNTNTGKLTF
clone_757_aK0	clonotype1652aKO	1	TRB:CASSLLTGGPYEQYF;TRA:CAMREGPGGNYKPTF
clone_758_aK0	clonotype1654aKO	1	TRB:CASSQELGASQNTLYF;TRA:CAMRAVNTGNYKYVF
clone_759_aK0	clonotype1657aKO	1	TRB:CASSPDRANTGQLYF;TRA:CAASAANTNKVVF
clone_760_aK0	clonotype1659aKO	1	TRB:CTCSAEAGYAEQFF;TRA:CAASEGNYAQGLTF
clone_761_aK0	clonotype1660aKO	1	TRB:CASSSDWGNQDTQYF;TRA:CALCRDYANKMIF
clone_762_aK0	clonotype1661aKO	1	TRB:CASSLLGYNYAEQFF;TRA:CALSHTGYQNFYF
clone_763_aK0	clonotype1662aKO	1	TRB:CASSQDGTANNQAPLF;TRA:CALSNYNQGKLIF
clone_764_aK0	clonotype1663aKO	1	TRB:CASSIGNQNTLYF;TRA:CALSDPGANTGKLTF
clone_765_aK0	clonotype1665aKO	1	TRB:CASSIGASGNTLYF
clone_766_aK0	clonotype1666aKO	1	TRB:CASSITASQNTLYF
clone_767_aK0	clonotype1667aKO	1	TRB:CASSIQGANSDYTF
clone_768_aK0	clonotype1668aKO	1	TRB:CASSIGTDYAEQFF
clone_769_aK0	clonotype1669aKO	1	TRB:CASSMRTSNERLFF
clone_770_aK0	clonotype166aKO	1	TRB:CASSLDTGDEQYF;TRA:CAASDTNAYKVIF;TRA:CAIDRGSALGRLHF
clone_771_aK0	clonotype1670aKO	1	TRB:CASSMVGGTYEQYF
clone_772_aK0	clonotype1671aKO	1	TRB:CASSIGSYNSPLYF
clone_773_aK0	clonotype1672aKO	1	TRB:CASSPDSSGNTLYF
clone_774_aK0	clonotype1674aKO	1	TRA:CALSDRGGNTGKLIF
clone_775_aK0	clonotype1675aKO	1	TRA:CSATLASSGSWQLIF
clone_776_aK0	clonotype1676aKO	1	TRA:CALVPRNNNNAPRF
clone_777_aK0	clonotype1677aKO	1	TRB:CASSSRLGGNSYEQYF
clone_778_aK0	clonotype1678aKO	1	TRB:CASSLIGESNTGQLYF
clone_779_aK0	clonotype1679aKO	1	TRB:CASSLDGWGSAETLYF
clone_780_aK0	clonotype1680aKO	1	TRB:CASSLEGGANTGQLYF
clone_781_aK0	clonotype1681aKO	1	TRB:CASSLVLGVSAETLYF
clone_782_aK0	clonotype1682aKO	1	TRB:CASSLVSWGNTGQLYF
clone_783_aK0	clonotype1683aKO	1	TRB:CASSPGTEISNERLFF
clone_784_aK0	clonotype1684aKO	1	TRB:CASSGDWGGSAETLYF
clone_785_aK0	clonotype1685aKO	1	TRB:CASSLDKGGRDAEQFF
clone_786_aK0	clonotype1686aKO	1	TRB:CASSLDPRGSGNTLYF
clone_787_aK0	clonotype1687aKO	1	TRB:CASSLDGTVNTGQLYF
clone_788_aK0	clonotype1688aKO	1	TRB:CASSLDGGPSAETLYF
clone_789_aK0	clonotype1689aKO	1	TRB:CASSLGRGPGYAEQFF
clone_790_aK0	clonotype1690aKO	1	TRB:CASSFPGQGTGNTLYF
clone_791_aK0	clonotype1692aKO	1	TRB:CASSPGGGPNYAEQFF
clone_792_aK0	clonotype1693aKO	1	TRB:CASSFRSPLSGNTLYF
clone_793_aK0	clonotype1695aKO	1	TRA:CALGDYSNNRLTL
clone_794_aK0	clonotype1696aKO	1	TRA:CALGDYSNNRLTL
clone_795_aK0	clonotype1697aKO	1	TRA:CALGDYSNNRLTL
clone_796_aK0	clonotype1698aKO	1	TRB:CTCRDWGGNTGQLYF
clone_797_aK0	clonotype1699aKO	1	TRB:CTCSPDRVNNQAPLF
clone_798_aK0	clonotype1700aKO	1	TRB:CTCSARRQTNTEVFF
clone_799_aK0	clonotype1701aKO	1	TRB:CTCSAELGGENTLYF
clone_800_aK0	clonotype1702aKO	1	TRB:CTCSAEGGYNSPLYF
clone_801_aK0	clonotype1703aKO	1	TRB:CTCSADQGAYAEQFF
clone_802_aK0	clonotype1705aKO	1	TRB:CTCSAADSYNSPLYF
clone_803_aK0	clonotype1706aKO	1	TRB:CTCSAGTGGNQAPLF
clone_804_aK0	clonotype1707aKO	1	TRB:CTCSAGGISNERLFF
clone_805_aK0	clonotype1708aKO	1	TRB:CTCSAVRDGAETLYF
clone_806_aK0	clonotype1709aKO	1	TRB:CTCSATGTLNQAPLF
clone_807_aK0	clonotype1710aKO	1	TRB:CTCSARTSNTGQLYF
clone_808_aK0	clonotype1711aKO	1	TRB:CTCSAGTSSAETLYF
clone_809_aK0	clonotype1712aKO	1	TRB:CTCSAGGRSAETLYF
clone_810_aK0	clonotype1713aKO	1	TRB:CTCSGTGGTNERLFF
clone_811_aK0	clonotype1715aKO	1	TRB:CASSLWGQGSNSDYTF;TRA:CATDDSGSWQLIF
clone_812_aK0	clonotype1716aKO	1	TRB:CASSPPGRTYEQYF;TRA:CALGDSGGNYKPTF;TRA:CVANSGTYQRF
clone_813_aK0	clonotype1718aKO	1	TRB:CTCSAVGGAGNTLYF;TRA:CAIDRGNNNAPRF
clone_814_aK0	clonotype1719aKO	1	TRB:CASSIAAGDYEQYF;TRA:CAGNYNQGKLIF
clone_815_aK0	clonotype1720aKO	1	TRB:CASSSDRGSETLYF;TRA:CAVRSGSWQLIF
clone_816_aK0	clonotype1721aKO	1	TRB:CASSSGHRAETLYF;TRA:CAASGLGYKLTF
clone_817_aK0	clonotype1722aKO	1	TRB:CASSLEGGGGAETLYF;TRA:CAMNYNQGKLIF
clone_818_aK0	clonotype1723aKO	1	TRB:CASSPGTGGNYAEQFF;TRA:CAAEADTNAYKVIF
clone_819_aK0	clonotype1725aKO	1	TRB:CASSIVGGQDTQYF;TRA:CVLSAGSAKLIF
clone_820_aK0	clonotype1726aKO	1	TRB:CASSPGLGTSAETLYF;TRA:CATDDGGNNRIFF
clone_821_aK0	clonotype1728aKO	1	TRB:CASSRDWGGDYAEQFF;TRA:CATDGSAGNKLTF
clone_822_aK0	clonotype1730aKO	1	TRB:CASSMGANTGQLYF;TRA:CAVSWTGNYKYVF
clone_823_aK0	clonotype1731aKO	1	TRB:CASSIQGAGERLFF;TRA:CAVTYNNNNAPRF
clone_824_aK0	clonotype1732aKO	1	TRB:CASRRDWGGENTLYF;TRB:CASSIVQNQDTQYF;TRA:CSATSSGQKLVF
clone_825_aK0	clonotype1733aKO	1	TRB:CASSMEGDTGQLYF;TRA:CAVSAHTNTGKLTF
clone_826_aK0	clonotype1734aKO	1	TRB:CASSLGLGSSAETLYF;TRA:CAASGGNAKLTF;TRA:CALSDLKGSSGNKLIF
clone_827_aK0	clonotype1735aKO	1	TRB:CASSFRDWGPSAETLYF;TRA:CALRPDYSNNRLTL
clone_828_aK0	clonotype1736aKO	1	TRB:CTCSATGGWGTEVFF;TRA:CAVSRSNNRIFF
clone_829_aK0	clonotype1739aKO	1	TRB:CASSHGTGGAGNTLYF;TRA:CVLSGYQGGRALIF
clone_830_aK0	clonotype173aKO	1	TRB:CASSLQTSGNTLYF;TRA:CAMRGNTGANTGKLTF
clone_831_aK0	clonotype1740aKO	1	TRB:CASSLGTGGAQNTLYF;TRA:CALSENTGNYKYVF;TRA:CAVTNNAGAKLTF
clone_832_aK0	clonotype1741aKO	1	TRB:CTCSVGQGANERLFF;TRA:CAARNTGYQNFYF
clone_833_aK0	clonotype1743aKO	1	TRB:CASSMGRANTEVFF;TRA:CALGAGGSNAKLTF
clone_834_aK0	clonotype1744aKO	1	TRB:CASSPWKEHSGNTLYF;TRA:CAVRSRHNTNTGKLTF
clone_835_aK0	clonotype1745aKO	1	TRB:CTCSAERGNQDTQYF;TRA:CALSDYSNNRLTL
clone_836_aK0	clonotype1746aKO	1	TRB:CASSLGRVNSGNTLYF;TRA:CALRLTGNTGKLIF
clone_837_aK0	clonotype1747aKO	1	TRB:CASSSDWGGGQDTQYF;TRA:CALGSSGSWQLIF
clone_838_aK0	clonotype1748aKO	1	TRB:CASSIGLVQNTLYF;TRA:CALSAAMNYNQGKLIF
clone_839_aK0	clonotype1749aKO	1	TRB:CASSRGLSQNTLYF;TRA:CAMRAFITGNTGKLIF
clone_840_aK0	clonotype1750aKO	1	TRB:CASSMTGGAETLYF;TRA:CAAEGTGNYKYVF
clone_841_aK0	clonotype1751aKO	1	TRB:CASSLSLGEVAETLYF;TRA:CAAVEGSFNKLTF
clone_842_aK0	clonotype1752aKO	1	TRB:CTCSAPGGSNERLFF;TRA:CAASKPGTGSNRLTF
clone_843_aK0	clonotype1753aKO	1	TRB:CASSMDRNTGQLYF;TRA:CALSLSNNRIFF
clone_844_aK0	clonotype1754aKO	1	TRB:CASSYGLGGLNYAEQFF;TRA:CALWEPLNTGYQNFYF
clone_845_aK0	clonotype1755aKO	1	TRB:CASSAGQGLYEQYF;TRA:CALSDHTEGADRLTF
clone_846_aK0	clonotype1756aKO	1	TRB:CTCSAGTANTGQLYF;TRA:CALSDVTEGADRLTF
clone_847_aK0	clonotype1757aKO	1	TRB:CASTPSTVSGNTLYF
clone_848_aK0	clonotype1758aKO	1	TRB:CASRYRGNSNERLFF
clone_849_aK0	clonotype1759aKO	1	TRB:CASSIAGGSSYEQYF
clone_850_aK0	clonotype175aKO	1	TRB:CASSLGQGEVAPLF;TRA:CALTLDTNAYKVIF
clone_851_aK0	clonotype1760aKO	1	TRB:CASSATGGNTGQLYF
clone_852_aK0	clonotype1761aKO	1	TRB:CASSLGGGPAETLYF
clone_853_aK0	clonotype1762aKO	1	TRA:CALSDRGNYAQGLTF
clone_854_aK0	clonotype1763aKO	1	TRA:CALSDRSSGSWQLIF
clone_855_aK0	clonotype1764aKO	1	TRA:CALSAPNSAGNKLTF
clone_856_aK0	clonotype1765aKO	1	TRA:CAMRGTNYGNEKITF
clone_857_aK0	clonotype1766aKO	1	TRA:CAMRGTSSGQKLVF
clone_858_aK0	clonotype1767aKO	1	TRA:CAMRDLSNTNKVVF
clone_859_aK0	clonotype1768aKO	1	TRB:CASSRDRGNYNNQAPLF
clone_860_aK0	clonotype1769aKO	1	TRB:CASSSGTGGGSQNTLYF
clone_861_aK0	clonotype1770aKO	1	TRB:CASSPPGLGGTYAEQFF
clone_862_aK0	clonotype1771aKO	1	TRB:CASGERGREQYF
clone_863_aK0	clonotype1773aKO	1	TRB:CASSQDWGGRGIYAEQFF
clone_864_aK0	clonotype1774aKO	1	TRA:CALGRNTNTGKLTF
clone_865_aK0	clonotype1775aKO	1	TRA:CALGRNTNTGKLTF
clone_866_aK0	clonotype1776aKO	1	TRA:CALGDSSGSWQLIF
clone_867_aK0	clonotype1777aKO	1	TRA:CALGVGSSGNKLIF
clone_868_aK0	clonotype1778aKO	1	TRB:CTCSAEDFISNERLFF
clone_869_aK0	clonotype1779aKO	1	TRB:CTCSAEDRVYNSPLYF
clone_870_aK0	clonotype177aKO	1	TRB:CASSQTGRAGNTLYF;TRA:CAAEFMSNYNVLYF
clone_871_aK0	clonotype1780aKO	1	TRB:CTCSADRIISNERLFF
clone_872_aK0	clonotype1781aKO	1	TRB:CTCSADGTANTGQLYF
clone_873_aK0	clonotype1782aKO	1	TRB:CTCSADSRGRDTEVFF
clone_874_aK0	clonotype1783aKO	1	TRB:CTCSADWGQGAVTLYF
clone_875_aK0	clonotype1784aKO	1	TRB:CTCSAAGGMNQDTQYF
clone_876_aK0	clonotype1785aKO	1	TRB:CTCSAGPGQGAETLYF
clone_877_aK0	clonotype1786aKO	1	TRB:CTCSVRDRGSNERLFF
clone_878_aK0	clonotype1787aKO	1	TRB:CASSIAGGSAETLYF;TRA:CAVDMGYKLTF
clone_879_aK0	clonotype1788aKO	1	TRB:CASSFPDWEGSAETLYF;TRA:CAMEGNMGYKLTF
clone_880_aK0	clonotype1789aKO	1	TRB:CASSRWTGANERLFF;TRA:CATANNNNAPRF
clone_881_aK0	clonotype1790aKO	1	TRB:CASSIRGANTGQLYF;TRA:CAMPPNYGNEKITF
clone_882_aK0	clonotype1791aKO	1	TRB:CASSLTGGAREQYF;TRB:CTCSPGLGVNQDTQYF;TRA:CAVSSNTNKVVF
clone_883_aK0	clonotype1792aKO	1	TRB:CASSIEGQSQNTLYF;TRA:CAASEPSGSWQLIF
clone_884_aK0	clonotype1794aKO	1	TRB:CTCSADLGLGSYEQYF;TRA:CAVTPNSNNRIFF
clone_885_aK0	clonotype1795aKO	1	TRB:CTCSADLGGSSYEQYF;TRA:CAVMTTASLGKLQF
clone_886_aK0	clonotype1797aKO	1	TRB:CTCSAAGLGGGDTQYF;TRA:CAVNPGANTGKLTF
clone_887_aK0	clonotype1798aKO	1	TRB:CTCSALDREDNERLFF;TRA:CAVSPDGSNNRLTL
clone_888_aK0	clonotype1799aKO	1	TRB:CTCSSSLTGIYAEQFF;TRA:CAVSGYGSSGNKLIF
clone_889_aK0	clonotype179aKO	1	TRB:CASSLEGGRNTLYF;TRA:CALSDGSGGNYKPTF
clone_890_aK0	clonotype1801aKO	1	TRB:CASSPPGHSQNTLYF;TRA:CAAGYAQGLTF
clone_891_aK0	clonotype1802aKO	1	TRB:CASSIGQGSGNTLYF;TRA:CALGGPTSGGNYKPTF
clone_892_aK0	clonotype1803aKO	1	TRB:CASGAAGTNTEVFF;TRB:CASSQDWGGRGIYAEQFF;TRA:CAASPNAYKVIF
clone_893_aK0	clonotype1804aKO	1	TRB:CASSPDIFSNERLFF;TRA:CALSDWSNNRIFF
clone_894_aK0	clonotype1805aKO	1	TRB:CASTPGGPANTGQLYF
clone_895_aK0	clonotype1806aKO	1	TRB:CASSIRQRAGQNTLYF
clone_896_aK0	clonotype1807aKO	1	TRB:CASSIGGGRGAETLYF
clone_897_aK0	clonotype1808aKO	1	TRB:CASSIWDTSYNSPLYF
clone_898_aK0	clonotype1809aKO	1	TRB:CASSIGTGGALAEQFF
clone_899_aK0	clonotype1811aKO	1	TRB:CASGVRGQNTLYF
clone_900_aK0	clonotype1812aKO	1	TRB:CTCSADRGAHDNQAPLF
clone_901_aK0	clonotype1813aKO	1	TRB:CASSIEAGGAADTQYF;TRA:CATDGGSGGKLTL
clone_902_aK0	clonotype1814aKO	1	TRB:CASSIEDRGGAETLYF;TRA:CAGGTNTGKLTF
clone_903_aK0	clonotype1815aKO	1	TRB:CASSIDGQGSQNTLYF;TRA:CAVRNNYAQGLTF
clone_904_aK0	clonotype1816aKO	1	TRB:CASSIGGGRGAETLYF;TRA:CAARVSAGNKLTF
clone_905_aK0	clonotype1817aKO	1	TRB:CASSFPGLGGSNYAEQFF;TRA:CAAANTGYQNFYF
clone_906_aK0	clonotype1818aKO	1	TRB:CASGYEQYF;TRA:CALGDPYQGGRALIF;TRA:CALGHLGYKLTF
clone_907_aK0	clonotype1819aKO	1	TRB:CASSPGTGGAPGQLYF;TRA:CAVSARGSSGNKLIF
clone_908_aK0	clonotype181aKO	1	TRB:CASSLVPANTEVFF;TRA:CAMRDNYAQGLTF
clone_909_aK0	clonotype1821aKO	1	TRA:CAASAYNVLYF
clone_910_aK0	clonotype1822aKO	1	TRA:CAGTGGYKVVF
clone_911_aK0	clonotype1823aKO	1	TRB:CASGEQGYTGQLYF
clone_912_aK0	clonotype1825aKO	1	TRB:CTCSADKSRGASNERLFF
clone_913_aK0	clonotype1826aKO	1	TRB:CASGDSGGAETLYF;TRA:CAAEAPGNTGKLIF
clone_914_aK0	clonotype1827aKO	1	TRB:CASGEPLSGNTLYF;TRA:CAVRGNSNNRIFF
clone_915_aK0	clonotype1828aKO	1	TRB:CASSITRTGGSQNTLYF;TRA:CAVSMVLSGSFNKLTF
clone_916_aK0	clonotype1829aKO	1	TRB:CASGDEDSAETLYF;TRA:CAVSPTGFASALTF
clone_917_aK0	clonotype1830aKO	1	TRB:CASGDDGVFF;TRA:CAARSGGSNAKLTF
clone_918_aK0	clonotype1831aKO	1	TRB:CATSSQNTLYF
clone_919_aK0	clonotype1832aKO	1	TRB:CASGELTDAFF
clone_920_aK0	clonotype1833aKO	1	TRB:CASGDAHEQYF
clone_921_aK0	clonotype1834aKO	1	TRB:CASGDGYEQYF
clone_922_aK0	clonotype1835aKO	1	TRB:CASSPQGEVFF
clone_923_aK0	clonotype1836aKO	1	TRB:CASSLHYEQYF
clone_924_aK0	clonotype1837aKO	1	TRB:CASSDWGTLYF
clone_925_aK0	clonotype1838aKO	1	TRB:CASSGGLEQYF
clone_926_aK0	clonotype1839aKO	1	TRB:CASGDAQAPLF;TRA:CAAEGSGGSNAKLTF
clone_927_aK0	clonotype1840aKO	1	TRB:CASSLGYEQYF;TRA:CAMGPASSGSWQLIF
clone_928_aK0	clonotype1841aKO	1	TRB:CASGDQGRLYF;TRA:CAARGSNYQLIW
clone_929_aK0	clonotype1843aKO	1	TRB:CTCSAPPGLGTVNQDTQYF;TRA:CALATSSGQKLVF
clone_930_aK0	clonotype1845aKO	1	TRB:CASGDEGEQYF;TRA:CAARGGSNAKLTF
clone_931_aK0	clonotype1846aKO	1	TRB:CASSLEYEQYF;TRA:CAASAGGNNKLTF
clone_932_aK0	clonotype1848aKO	1	TRA:CAARKGSNYQLIW
clone_933_aK0	clonotype1849aKO	1	TRA:CAASPSNYNVLYF
clone_934_aK0	clonotype1850aKO	1	TRA:CAARRNNNNAPRF
clone_935_aK0	clonotype1851aKO	1	TRA:CAARRNNNNAPRF
clone_936_aK0	clonotype1852aKO	1	TRA:CAASDYSNNRLTL
clone_937_aK0	clonotype1853aKO	1	TRA:CAASASSGSWQLIF
clone_938_aK0	clonotype1854aKO	1	TRA:CAASGQGGRALIF
clone_939_aK0	clonotype1855aKO	1	TRA:CAADNTNTGKLTF
clone_940_aK0	clonotype1856aKO	1	TRB:CASGDAGGVNQDTQYF
clone_941_aK0	clonotype1857aKO	1	TRB:CASGDADREVFF
clone_942_aK0	clonotype1858aKO	1	TRB:CASGDVWAIEYF
clone_943_aK0	clonotype1859aKO	1	TRB:CASGGGGNTLYF
clone_944_aK0	clonotype1860aKO	1	TRB:CARDRDNQAPLF
clone_945_aK0	clonotype1861aKO	1	TRB:CASSLGQYEQYF
clone_946_aK0	clonotype1862aKO	1	TRB:CASSLGGSEQYF;TRA:CALEPNTNKVVF
clone_947_aK0	clonotype1863aKO	1	TRB:CASGDWGGALYF;TRA:CAHNNNNAPRF
clone_948_aK0	clonotype1864aKO	1	TRB:CASSQQGNTLYF;TRA:CAMRGSALGRLHF
clone_949_aK0	clonotype1865aKO	1	TRB:CASSLDWNEQYF;TRA:CALENTGYQNFYF
clone_950_aK0	clonotype1866aKO	1	TRB:CASSLAQQAPLF;TRA:CAADTNAYKVIF
clone_951_aK0	clonotype1867aKO	1	TRB:CASSLKGWEQYF;TRA:CALSDRNTGNYKYVF;TRA:CVLSDMGYKLTF
clone_952_aK0	clonotype1869aKO	1	TRB:CASGDRGSDYTF;TRA:CAVSATGGNNKLTF
clone_953_aK0	clonotype186aKO	1	TRB:CASSLGQGAGNTLYF;TRA:CAASEHHGSSGNKLIF
clone_954_aK0	clonotype1870aKO	1	TRB:CASGDVGTEVFF;TRA:CALSDTGGYKVVF
clone_955_aK0	clonotype1871aKO	1	TRB:CASGDDNQAPLF;TRA:CAASHPNTGKLTF;TRA:CALSGGSNAKLTF
clone_956_aK0	clonotype1872aKO	1	TRB:CASSLGNSPLYF;TRA:CAASDNTNTGKLTF
clone_957_aK0	clonotype1873aKO	1	TRA:CAASGRAGNYKYVF
clone_958_aK0	clonotype1874aKO	1	TRA:CAASGTEGADRLTF
clone_959_aK0	clonotype1875aKO	1	TRA:CAANVNTGNYKYVF
clone_960_aK0	clonotype1876aKO	1	TRA:CAANVNTGNYKYVF
clone_961_aK0	clonotype1877aKO	1	TRA:CAANVNTGNYKYVF
clone_962_aK0	clonotype1878aKO	1	TRA:CAANVNTGNYKYVF
clone_963_aK0	clonotype1879aKO	1	TRA:CAASRGSNYNVLYF
clone_964_aK0	clonotype1880aKO	1	TRB:CASAGQGSETLYF
clone_965_aK0	clonotype1881aKO	1	TRB:CASGEGGADTQYF
clone_966_aK0	clonotype1882aKO	1	TRB:CASGGDSATEVFF
clone_967_aK0	clonotype1883aKO	1	TRB:CASGWTGEDTQYF
clone_968_aK0	clonotype1884aKO	1	TRB:CASGHFSNERLFF
clone_969_aK0	clonotype1885aKO	1	TRB:CASGPGQQDTQYF
clone_970_aK0	clonotype1886aKO	1	TRB:CASGENRNTEVFF
clone_971_aK0	clonotype1887aKO	1	TRB:CASGETGNSDYTF
clone_972_aK0	clonotype1888aKO	1	TRB:CASGEQNTGQLYF
clone_973_aK0	clonotype1889aKO	1	TRB:CASGEGTHYEQYF
clone_974_aK0	clonotype1890aKO	1	TRB:CASGDRSSYEQYF
clone_975_aK0	clonotype1891aKO	1	TRB:CASGDADNSPLYF
clone_976_aK0	clonotype1893aKO	1	TRB:CASGDGLGNTLYF
clone_977_aK0	clonotype1894aKO	1	TRB:CASAGQNQNTLYF
clone_978_aK0	clonotype1896aKO	1	TRB:CASSHRQGFEQYF
clone_979_aK0	clonotype1897aKO	1	TRB:CASSPSLDSPLYF
clone_980_aK0	clonotype1898aKO	1	TRB:CASSLEQINTLYF
clone_981_aK0	clonotype1899aKO	1	TRB:CASSLGGLDTQYF
clone_982_aK0	clonotype1900aKO	1	TRB:CASSGGAGDTQYF
clone_983_aK0	clonotype1901aKO	1	TRB:CASSPGPNSDYTF
clone_984_aK0	clonotype1902aKO	1	TRB:CASSDSANSDYTF
clone_985_aK0	clonotype1903aKO	1	TRB:CASSPGGYAEQFF
clone_986_aK0	clonotype1905aKO	1	TRB:CASSLAGGLEQYF
clone_987_aK0	clonotype1906aKO	1	TRB:CASSLETEDTQYF
clone_988_aK0	clonotype1907aKO	1	TRB:CASSSGQQNTLYF
clone_989_aK0	clonotype1908aKO	1	TRB:CASGDGGTGQLYF;TRA:CAADDGNEKITF;TRA:CALSSSNNRIFF
clone_990_aK0	clonotype1909aKO	1	TRB:CASGEDWGDTQYF;TRA:CAVSMGYKLTF
clone_991_aK0	clonotype190aKO	1	TRB:CASSPTGGAIYAEQFF;TRA:CALLNTEGADRLTF;TRA:CAVLASSSFSKLVF
clone_992_aK0	clonotype1910aKO	1	TRB:CASSSGTGDTQYF;TRA:CAAEADYANKMIF
clone_993_aK0	clonotype1912aKO	1	TRB:CASSATANSDYTF;TRA:CAAVNNAGAKLTF
clone_994_aK0	clonotype1913aKO	1	TRB:CASSPSGNSDYTF;TRA:CAMERGSALGRLHF
clone_995_aK0	clonotype1914aKO	1	TRB:CASSLTGGWEQYF;TRA:CALENSSGSWQLIF
clone_996_aK0	clonotype1916aKO	1	TRB:CASGDAGGYEQYF;TRA:CAMRGSSGSWQLIF;TRA:CAMVNTNTGKLTF
clone_997_aK0	clonotype1917aKO	1	TRB:CASSDWGGYEQYF;TRA:CAVSRTGGYKVVF
clone_998_aK0	clonotype1918aKO	1	TRB:CASGGTAQNTLYF;TRA:CAVSADQGGRALIF
clone_999_aK0	clonotype1919aKO	1	TRB:CASGDTSQDTQYF;TRA:CAVRYMGYKLTF
clone_1000_aK0	clonotype191aKO	1	TRB:CTCSTTGGAHAEQFF;TRA:CALSIYSNNRLTL
clone_1001_aK0	clonotype1920aKO	1	TRB:CASGDAPGYEQYF;TRA:CAVSIGTGGYKVVF
clone_1002_aK0	clonotype1921aKO	1	TRB:CASGDVGGQAPLF;TRB:CASSPGLGGRRNTQYF;TRA:CAASNNNNAPRF
clone_1003_aK0	clonotype1922aKO	1	TRB:CASGGPGYSDYTF;TRA:CALRWGGTGSKLSF
clone_1004_aK0	clonotype1923aKO	1	TRB:CASGLGVSYEQYF;TRA:CALEGRGTGSKLSF
clone_1005_aK0	clonotype1924aKO	1	TRB:CASGVGNQNTLYF;TRA:CAVRDPPWGSSGNKLIF
clone_1006_aK0	clonotype1926aKO	1	TRB:CASGEGLGASQYF;TRA:CAASKTASLGKLQF
clone_1007_aK0	clonotype1928aKO	1	TRB:CASGDVWGDTLYF;TRA:CVVGDRGSALGRLHF
clone_1008_aK0	clonotype1929aKO	1	TRB:CASSYDPNSDYTF;TRA:CALGDQGGRALIF
clone_1009_aK0	clonotype1930aKO	1	TRB:CASSGGATYEQYF;TRA:CAASPLLGSGGKLTL
clone_1010_aK0	clonotype1931aKO	1	TRB:CASSLGGSSEQYF;TRA:CAVSAGGTQVVGQLTF
clone_1011_aK0	clonotype1932aKO	1	TRB:CASGEGWGGEQYF;TRA:CAAITGANTGKLTF
clone_1012_aK0	clonotype1933aKO	1	TRA:CAASDQANAGAKLTF
clone_1013_aK0	clonotype1934aKO	1	TRB:CASGTGTGNTEVFF
clone_1014_aK0	clonotype1935aKO	1	TRB:CASGLQGDNQAPLF
clone_1015_aK0	clonotype1936aKO	1	TRB:CASGLQGDNQAPLF
clone_1016_aK0	clonotype1937aKO	1	TRB:CASGPTRDTYEQYF
clone_1017_aK0	clonotype1938aKO	1	TRB:CASGPGTGGYEQYF
clone_1018_aK0	clonotype193aKO	1	TRB:CASSPGTTNTEVFF;TRA:CALSDRSNYNVLYF
clone_1019_aK0	clonotype1940aKO	1	TRB:CASGELGNYAEQFF
clone_1020_aK0	clonotype1941aKO	1	TRB:CASGDGGNQDTQYF
clone_1021_aK0	clonotype1942aKO	1	TRB:CASGDWGGANTQYF
clone_1022_aK0	clonotype1943aKO	1	TRB:CASGDPGAYAEQFF
clone_1023_aK0	clonotype1944aKO	1	TRB:CASGDAGLDSDYTF
clone_1024_aK0	clonotype1945aKO	1	TRB:CASGDAGGGQAPLF
clone_1025_aK0	clonotype1946aKO	1	TRB:CASGARRGGNTLYF
clone_1026_aK0	clonotype1947aKO	1	TRB:CASGGDRDGTEVFF
clone_1027_aK0	clonotype1949aKO	1	TRB:CASGSGGSTGQLYF
clone_1028_aK0	clonotype1950aKO	1	TRB:CASSLEGDTGQLYF
clone_1029_aK0	clonotype1951aKO	1	TRB:CASSLTGGFSDYTF
clone_1030_aK0	clonotype1952aKO	1	TRB:CASSHSGDQNTLYF
clone_1031_aK0	clonotype1954aKO	1	TRB:CASSPGLGGYEQYF
clone_1032_aK0	clonotype1955aKO	1	TRB:CASSRGASQNTLYF
clone_1033_aK0	clonotype1956aKO	1	TRB:CASSLGQSSYEQYF
clone_1034_aK0	clonotype1957aKO	1	TRB:CASSLRTGGYEQYF
clone_1035_aK0	clonotype1958aKO	1	TRB:CASSLWGNYAEQFF
clone_1036_aK0	clonotype1959aKO	1	TRB:CASSLTDSQNTLYF
clone_1037_aK0	clonotype1960aKO	1	TRB:CASGEGRGRERLFF;TRA:CASSGSWQLIF
clone_1038_aK0	clonotype1961aKO	1	TRB:CASGRQGANSDYTF;TRA:CAANYNQGKLIF;TRA:CAMREGSSGSWQLIF
clone_1039_aK0	clonotype1962aKO	1	TRB:CASSLRSSAETLYF;TRA:CIVTDMTNTGKLTF
clone_1040_aK0	clonotype1963aKO	1	TRB:CASGDRGLYAEQFF;TRA:CAASMSNMGYKLTF;TRA:CAMELPGGYKVVF
clone_1041_aK0	clonotype1964aKO	1	TRB:CASGGDWGGYEQYF;TRA:CATNGSSGNKLIF
clone_1042_aK0	clonotype1965aKO	1	TRB:CASSLTGAGSDYTF;TRA:CALVMDSNYQLIW
clone_1043_aK0	clonotype1966aKO	1	TRB:CASSLNGANSDYTF;TRA:CAIDNQGGRALIF
clone_1044_aK0	clonotype1968aKO	1	TRB:CASSLVGNTGQLYF;TRA:CAAEADNNNAPRF
clone_1045_aK0	clonotype1969aKO	1	TRB:CASARTYSGNTLYF;TRA:CALERGQGGRALIF
clone_1046_aK0	clonotype1970aKO	1	TRB:CASGRTESNTEVFF;TRA:CALELDYGNEKITF
clone_1047_aK0	clonotype1971aKO	1	TRB:CASGDAGGAIEQYF;TRA:CAALAYQGGRALIF;TRA:CAARGATSSGQKLVF
clone_1048_aK0	clonotype1972aKO	1	TRB:CASGDGLGGYEQYF;TRA:CATDVNTGKLTF
clone_1049_aK0	clonotype1973aKO	1	TRB:CASGGTGGAETLYF;TRA:CAVSRNNNAPRF
clone_1050_aK0	clonotype1974aKO	1	TRB:CASSPDSNQDTQYF;TRA:CILRVEDTEGADRLTF
clone_1051_aK0	clonotype1975aKO	1	TRB:CASARDRDTSDYTF;TRA:CILRVAKATGGNNKLTF
clone_1052_aK0	clonotype1976aKO	1	TRB:CASSLAGESSDYTF;TRA:CAVRMDYANKMIF
clone_1053_aK0	clonotype1977aKO	1	TRB:CASSLGTGGERLFF;TRA:CALRDYGNEKITF
clone_1054_aK0	clonotype1978aKO	1	TRB:CASSSGQPNSDYTF;TRA:CAVSMDYANKMIF
clone_1055_aK0	clonotype1979aKO	1	TRB:CASGAGTGQDTQYF;TRA:CALRGSSNTNKVVF;TRA:CAVSLNYNQGKLIF
clone_1056_aK0	clonotype1980aKO	1	TRB:CASGDAWGEDTQYF;TRA:CAASASSGSWQLIF
clone_1057_aK0	clonotype1981aKO	1	TRB:CASGDGLGGLEQYF;TRA:CAVSMNTGYQNFYF
clone_1058_aK0	clonotype1982aKO	1	TRB:CASSPGQGNSPLYF;TRA:CAPNYGNEKITF
clone_1059_aK0	clonotype1983aKO	1	TRB:CASSLGGAEDTQYF;TRA:CAASSGGNNKLTF;TRA:CALERGSGGSNYKLTF
clone_1060_aK0	clonotype1984aKO	1	TRB:CASGDWGGQDTQYF;TRA:CAASVRGNEKITF
clone_1061_aK0	clonotype1985aKO	1	TRB:CASSPGYSGNTLYF;TRA:CALSSSSGSWQLIF
clone_1062_aK0	clonotype1987aKO	1	TRB:CASSLQGGNPPLYF;TRA:CAARPSSNTNKVVF
clone_1063_aK0	clonotype1988aKO	1	TRB:CASSPPYSAETLYF;TRA:CALDPDYSNNRLTL
clone_1064_aK0	clonotype1989aKO	1	TRB:CASGEGWGAAEQFF;TRA:CALGSSGSWQLIF
clone_1065_aK0	clonotype1990aKO	1	TRB:CASGDAGGTGQLYF;TRA:CALSDLWNQGKLIF
clone_1066_aK0	clonotype1991aKO	1	TRB:CASGDAGSQNTLYF;TRA:CAMVTQVVGQLTF
clone_1067_aK0	clonotype1994aKO	1	TRB:CASSLGDRFYEQYF;TRA:CALGEPSGSWQLIF
clone_1068_aK0	clonotype1995aKO	1	TRB:CASGDAGTNSDYTF;TRA:CALGDPGTGGYKVVF
clone_1069_aK0	clonotype1996aKO	1	TRB:CASSRRLGGSEQYF;TRA:CAASPPGNYKYVF
clone_1070_aK0	clonotype1998aKO	1	TRB:CASSLGLSQNTLYF;TRA:CAASEQGTGSKLSF
clone_1071_aK0	clonotype1999aKO	1	TRB:CASSPGLGDYEQYF;TRA:CAARRNYNQGKLIF
clone_1072_aK0	clonotype2000aKO	1	TRA:CALSGMGYKLTF
clone_1073_aK0	clonotype2003aKO	1	TRB:CASGEGGANTGQLYF
clone_1074_aK0	clonotype2004aKO	1	TRB:CASGDTGVSNERLFF
clone_1075_aK0	clonotype2005aKO	1	TRB:CASGDHRASGNTLYF
clone_1076_aK0	clonotype2006aKO	1	TRB:CASGDAGGTGNTLYF
clone_1077_aK0	clonotype2007aKO	1	TRB:CASGDATGGFAEQFF
clone_1078_aK0	clonotype2008aKO	1	TRB:CASGDGQGFNQAPLF
clone_1079_aK0	clonotype200aKO	1	TRB:CASSLVGGAAAEQFF;TRB:CTCSAEGLGVSAETLYF;TRA:CVLSANTGYQNFYF
clone_1080_aK0	clonotype2010aKO	1	TRB:CASGDWDWVQDTQYF
clone_1081_aK0	clonotype2011aKO	1	TRB:CASGADRGRAETLYF
clone_1082_aK0	clonotype2013aKO	1	TRB:CASGADRGRAETLYF
clone_1083_aK0	clonotype2014aKO	1	TRB:CASGGLGGYSYEQYF
clone_1084_aK0	clonotype2015aKO	1	TRB:CASGGDRGRAETLYF
clone_1085_aK0	clonotype2016aKO	1	TRB:CASGGTGGNYAEQFF
clone_1086_aK0	clonotype2017aKO	1	TRB:CASGGTGGNYAEQFF
clone_1087_aK0	clonotype2018aKO	1	TRB:CASGGTGGNYAEQFF
clone_1088_aK0	clonotype2019aKO	1	TRB:CASGGGTNNQDTQYF
clone_1089_aK0	clonotype2020aKO	1	TRB:CASSPDRISNERLFF
clone_1090_aK0	clonotype2021aKO	1	TRB:CASSRDWGVAETLYF
clone_1091_aK0	clonotype2022aKO	1	TRB:CASSLGTANTGQLYF
clone_1092_aK0	clonotype2023aKO	1	TRB:CASSAHRGSYAEQFF
clone_1093_aK0	clonotype2024aKO	1	TRB:CASSLDWGYQDTQYF
clone_1094_aK0	clonotype2025aKO	1	TRB:CASSLAGQGVAEQFF
clone_1095_aK0	clonotype2027aKO	1	TRB:CASSLGLGSAETLYF
clone_1096_aK0	clonotype2028aKO	1	TRB:CASSQNWGSYAEQFF
clone_1097_aK0	clonotype2029aKO	1	TRB:CASSPSGGAYAEQFF
clone_1098_aK0	clonotype2030aKO	1	TRB:CASSPRQDANSDYTF
clone_1099_aK0	clonotype2031aKO	1	TRB:CASSLGTGGGAEQFF
clone_1100_aK0	clonotype2032aKO	1	TRB:CASSSRLGGYAEQFF
clone_1101_aK0	clonotype2033aKO	1	TRB:CASSSRLGGYAEQFF
clone_1102_aK0	clonotype2034aKO	1	TRB:CASSLGDNLNTEVFF;TRA:CAMELRNYQLIW
clone_1103_aK0	clonotype2035aKO	1	TRB:CASGEAGGSNERLFF;TRA:CAAEGYNQGKLIF
clone_1104_aK0	clonotype2036aKO	1	TRB:CASSLDDRANSDYTF;TRA:CAMDRDSNYQLIW
clone_1105_aK0	clonotype2037aKO	1	TRB:CASSLDGISNERLFF;TRA:CAAEDTNTGKLTF
clone_1106_aK0	clonotype2038aKO	1	TRB:CASSPWGENYAEQFF;TRA:CAIDRWSNYQLIW
clone_1107_aK0	clonotype2039aKO	1	TRB:CASSPHWGNQDTQYF;TRA:CALERRDSNYQLIW
clone_1108_aK0	clonotype203aKO	1	TRB:CAWSPPQYF
clone_1109_aK0	clonotype2041aKO	1	TRB:CASGGTGGNYAEQFF;TRA:CAVSMTGYQNFYF
clone_1110_aK0	clonotype2042aKO	1	TRB:CASSPRPVSQNTLYF;TRA:CALSDNYAQGLTF
clone_1111_aK0	clonotype2043aKO	1	TRB:CASSLWTGGSYEQYF;TRA:CALDGDNNAGAKLTF
clone_1112_aK0	clonotype2044aKO	1	TRB:CASSRLGGGAETLYF;TRA:CATEDSGYNKLTF
clone_1113_aK0	clonotype2045aKO	1	TRB:CASSLDWGNYAEQFF;TRA:CAVTLNAYKVIF
clone_1114_aK0	clonotype2046aKO	1	TRB:CASGPTGGAPAEQFF;TRA:CAVIPSSGSWQLIF
clone_1115_aK0	clonotype2047aKO	1	TRB:CASGAGQDSGNTLYF;TRA:CALSRSNMGYKLTF
clone_1116_aK0	clonotype2048aKO	1	TRB:CASSLGHNSNERLFF;TRA:CAAFNYAQGLTF
clone_1117_aK0	clonotype204aKO	1	TRA:CAISNNRIFF
clone_1118_aK0	clonotype2052aKO	1	TRB:CASGVGTDYNSPLYF;TRA:CAASYQGGRALIF
clone_1119_aK0	clonotype2053aKO	1	TRB:CASSLQGDSGNTLYF;TRA:CAASDNNRIFF;TRA:CALSLDYANKMIF
clone_1120_aK0	clonotype2054aKO	1	TRB:CASSLSDGSSYEQYF;TRA:CALGVNYAQGLTF
clone_1121_aK0	clonotype2055aKO	1	TRB:CASSAPGQGQNTLYF;TRA:CALGDQGGRALIF
clone_1122_aK0	clonotype2057aKO	1	TRB:CASSLGTGGAYEQYF;TRA:CAATPDTGYQNFYF
clone_1123_aK0	clonotype2058aKO	1	TRB:CASGAREGTGNTLYF;TRA:CVVGDRGSALGRLHF
clone_1124_aK0	clonotype2059aKO	1	TRB:CASSLVGGRHAEQFF;TRA:CVLTGMQQGTGSKLSF
clone_1125_aK0	clonotype205aKO	1	TRB:CAWSLYEQYF
clone_1126_aK0	clonotype2060aKO	1	TRB:CASSLEDISGNTLYF;TRA:CALGDPNSAGNKLTF
clone_1127_aK0	clonotype2062aKO	1	TRB:CASSPGGAHYAEQFF;TRA:CALGAYNYAQGLTF
clone_1128_aK0	clonotype2063aKO	1	TRB:CASGAATGSAETLYF;TRA:CAMREGGAGNTGKLIF
clone_1129_aK0	clonotype2064aKO	1	TRB:CASSLEGTYNQAPLF;TRA:CAMREGGGSALGRLHF
clone_1130_aK0	clonotype2065aKO	1	TRB:CASGGGQGGTGQLYF;TRA:CAASNSGSWQLIF
clone_1131_aK0	clonotype2066aKO	1	TRB:CASSLGTGGAYEQYF;TRA:CAASEDQGGRALIF
clone_1132_aK0	clonotype2067aKO	1	TRB:CASPLHRENTGQLYF;TRA:CAASGTDYNQGKLIF
clone_1133_aK0	clonotype2068aKO	1	TRB:CASGDPGGGAETLYF;TRA:CALSETGNTGKLIF
clone_1134_aK0	clonotype2069aKO	1	TRB:CASGAGTGRANTEVFF
clone_1135_aK0	clonotype206aKO	1	TRB:CASSDFEQYF
clone_1136_aK0	clonotype2070aKO	1	TRB:CASGEQGAFNQDTQYF
clone_1137_aK0	clonotype2071aKO	1	TRB:CASGEGTGVNYAEQFF
clone_1138_aK0	clonotype2072aKO	1	TRB:CASGVPGQGADTEVFF
clone_1139_aK0	clonotype2073aKO	1	TRB:CASSLRDWGFYAEQFF
clone_1140_aK0	clonotype2075aKO	1	TRB:CASSLSGAGSQNTLYF
clone_1141_aK0	clonotype2076aKO	1	TRB:CASSHRDTYNYAEQFF
clone_1142_aK0	clonotype2077aKO	1	TRB:CASSPPDKISNERLFF
clone_1143_aK0	clonotype2078aKO	1	TRB:CASSPFRGGSAETLYF
clone_1144_aK0	clonotype2079aKO	1	TRB:CASSLEDWGDTGQLYF
clone_1145_aK0	clonotype207aKO	1	TRB:CGDRQGEQYF;TRA:CAADTNAYKVIF
clone_1146_aK0	clonotype2080aKO	1	TRB:CASSAGLGGSQNTLYF
clone_1147_aK0	clonotype2082aKO	1	TRB:CASGDYRGYSGNTLYF;TRA:CILRVADTGANTGKLTF
clone_1148_aK0	clonotype2083aKO	1	TRB:CASSLGLGASAETLYF;TRA:CATDNYSNNRLTL
clone_1149_aK0	clonotype2084aKO	1	TRB:CASGDAPKISNERLFF;TRA:CAASMNYNQGKLIF
clone_1150_aK0	clonotype2086aKO	1	TRB:CASGDVLGARQDTQYF;TRA:CALSPSGSWQLIF
clone_1151_aK0	clonotype2089aKO	1	TRB:CASSLGDRQDAETLYF;TRA:CALVEASSGQKLVF
clone_1152_aK0	clonotype208aKO	1	TRB:CAWSQAAEQFF
clone_1153_aK0	clonotype2090aKO	1	TRB:CASSLGQGEGAETLYF;TRA:CAMRATSSGQKLVF
clone_1154_aK0	clonotype2091aKO	1	TRA:CALSYNTGNYKYVF
clone_1155_aK0	clonotype2092aKO	1	TRB:CASGDVPGLGGQDTQYF
clone_1156_aK0	clonotype2093aKO	1	TRB:CASSLGSGGYNYAEQFF
clone_1157_aK0	clonotype2094aKO	1	TRB:CASSQRLGGRAQNTLYF;TRA:CATDDTNAYKVIF
clone_1158_aK0	clonotype2095aKO	1	TRB:CASGDGTGGADTGQLYF;TRA:CAASAGYNQGKLIF
clone_1159_aK0	clonotype2096aKO	1	TRA:CALSDLAGGNNKLTF
clone_1160_aK0	clonotype2097aKO	1	TRB:CASGVSGTGDPFSNERLFF
clone_1161_aK0	clonotype209aKO	1	TRA:CILFTGSGGKLTL
clone_1162_aK0	clonotype210aKO	1	TRA:CILFTGSGGKLTL
clone_1163_aK0	clonotype211aKO	1	TRB:CGARGDSIPLF
clone_1164_aK0	clonotype212aKO	1	TRB:CASSLGGQYAEQFF;TRB:CAWSLDSDYTF;TRA:CAISSNTNKVVF
clone_1165_aK0	clonotype213aKO	1	TRB:CASSQATQYF;TRA:CAVREDNTGKLTF
clone_1166_aK0	clonotype214aKO	1	TRB:CASRASAETLYF;TRB:CAWEQDYEQYF;TRA:CAMENTGNYKYVF
clone_1167_aK0	clonotype215aKO	1	TRB:CASSQDTQYF;TRB:CASSQSAGGDNQAPLF;TRA:CAARAGNTGKLIF;TRA:CALGDYSNNRLTL
clone_1168_aK0	clonotype216aKO	1	TRB:CASSSSYEQYF;TRA:CAVSSGGNYKPTF
clone_1169_aK0	clonotype217aKO	1	TRB:CASRGQGYNYAEQFF;TRB:CAWSGVYEQYF;TRA:CAASASSYGSSGNKLIF;TRA:CATGANYGNEKITF
clone_1170_aK0	clonotype218aKO	1	TRB:CASINTGQLYF;TRA:CAMREGAGYQNFYF
clone_1171_aK0	clonotype219aKO	1	TRB:CASGDHLQYF;TRA:CAPTLMDYANKMIF
clone_1172_aK0	clonotype220aKO	1	TRB:CASSFGTEVFF;TRB:CGAREGAEVFF;TRA:CALSETGFASALTF
clone_1173_aK0	clonotype221aKO	1	TRB:CASSLSGGLSYEQYF;TRB:CGAMSPYEQYF;TRA:CAASSGESWQLIF
clone_1174_aK0	clonotype222aKO	1	TRA:CAMRSGSWQLIF
clone_1175_aK0	clonotype223aKO	1	TRA:CAITEGADRLTF
clone_1176_aK0	clonotype224aKO	1	TRB:CASSQETEQFF
clone_1177_aK0	clonotype225aKO	1	TRB:CASSQETEQFF
clone_1178_aK0	clonotype226aKO	1	TRB:CASSQETEQFF
clone_1179_aK0	clonotype227aKO	1	TRA:CAAEYYAQGLTF
clone_1180_aK0	clonotype228aKO	1	TRB:CARTQGNTEVFF
clone_1181_aK0	clonotype229aKO	1	TRB:CAWSQGRDTLYF
clone_1182_aK0	clonotype230aKO	1	TRB:CAWSLRDSDYTF
clone_1183_aK0	clonotype231aKO	1	TRB:CAWDQGRTEVFF
clone_1184_aK0	clonotype232aKO	1	TRB:CASRGINTLYF
clone_1185_aK0	clonotype233aKO	1	TRB:CASGDSYEQYF
clone_1186_aK0	clonotype234aKO	1	TRB:CASGDVDEQYF
clone_1187_aK0	clonotype235aKO	1	TRB:CASKETNYEQYF
clone_1188_aK0	clonotype236aKO	1	TRB:CASRDTNSDYTF
clone_1189_aK0	clonotype237aKO	1	TRB:CASRDSAETLYF
clone_1190_aK0	clonotype238aKO	1	TRB:CASRDSAETLYF
clone_1191_aK0	clonotype239aKO	1	TRB:CASRDSAETLYF
clone_1192_aK0	clonotype240aKO	1	TRB:CASRDSAETLYF
clone_1193_aK0	clonotype241aKO	1	TRB:CASSDATDEQYF
clone_1194_aK0	clonotype242aKO	1	TRB:CASSDAAERLFF
clone_1195_aK0	clonotype243aKO	1	TRB:CASSDAAERLFF
clone_1196_aK0	clonotype244aKO	1	TRB:CASSDAAERLFF
clone_1197_aK0	clonotype245aKO	1	TRB:CASSDAAERLFF
clone_1198_aK0	clonotype246aKO	1	TRB:CASSDAAERLFF
clone_1199_aK0	clonotype247aKO	1	TRB:CASSSNEQYF
clone_1200_aK0	clonotype248aKO	1	TRB:CSSGGRSTEVFF
clone_1201_aK0	clonotype249aKO	1	TRB:CGARQGGAEQFF
clone_1202_aK0	clonotype250aKO	1	TRB:CGARTSNSDYTF
clone_1203_aK0	clonotype251aKO	1	TRB:CGARVPGERLFF
clone_1204_aK0	clonotype252aKO	1	TRB:CGGTGVNQAPLF
clone_1205_aK0	clonotype253aKO	1	TRB:CGARDQANSDYTF;TRB:CGARQGVTEVFF;TRA:CAIGRGYKLTF;TRA:CLGYKLTF
clone_1206_aK0	clonotype254aKO	1	TRB:CASSDGNSDYTF;TRA:CALNTNTGKLTF
clone_1207_aK0	clonotype255aKO	1	TRB:CAWSLTNERLFF;TRA:CAAENTGYQNFYF
clone_1208_aK0	clonotype256aKO	1	TRB:CAWSLARGEQYF;TRA:CAHLYGSSGNKLIF
clone_1209_aK0	clonotype257aKO	1	TRB:CAGLGDGNTLYF;TRA:CALRNNNNAPRF
clone_1210_aK0	clonotype258aKO	1	TRB:CAWSPRGQAPLF;TRA:CAVPLPGTGSNRLTF
clone_1211_aK0	clonotype259aKO	1	TRB:CAWSLGITEVFF;TRA:CAVSIRSNNRIFF
clone_1212_aK0	clonotype260aKO	1	TRB:CASSLRDNAETLYF;TRB:CASSNRDEQYF;TRA:CAAPIASSSFSKLVF
clone_1213_aK0	clonotype261aKO	1	TRB:CGARLGGYEQYF;TRA:CAVRANSGTYQRF
clone_1214_aK0	clonotype263aKO	1	TRB:CAWSRGPERLFF;TRA:CALGGGSNYKLTF;TRA:CAVSLPTGGNNKLTF
clone_1215_aK0	clonotype264aKO	1	TRB:CAWSLRQNTLYF;TRA:CVLSDDSGYNKLTF
clone_1216_aK0	clonotype265aKO	1	TRB:CASGAKDTQYF;TRA:CAASITNYNVLYF
clone_1217_aK0	clonotype266aKO	1	TRB:CASSGTGDEQYF;TRA:CAARPSGSWQLIF
clone_1218_aK0	clonotype267aKO	1	TRB:CGARGGGYEQYF;TRA:CALTSSNYNVLYF
clone_1219_aK0	clonotype268aKO	1	TRB:CAWSWGTYEQYF;TRA:CAASAGTGNYKYVF
clone_1220_aK0	clonotype270aKO	1	TRB:CASSNRGAEQFF;TRA:CAVSDTSNYNVLYF
clone_1221_aK0	clonotype271aKO	1	TRB:CGARADRGEVFF;TRA:CVLGRNYGSSGNKLIF
clone_1222_aK0	clonotype272aKO	1	TRB:CASSGGNTEVFF;TRA:CALIRNYNQGKLIF
clone_1223_aK0	clonotype273aKO	1	TRB:CASSDPGYEQYF;TRA:CALGDTGANTGKLTF
clone_1224_aK0	clonotype274aKO	1	TRB:CASSPSDYTF;TRB:CASSWTGTTGQLYF;TRA:CALSEAGGNYKPTF
clone_1225_aK0	clonotype275aKO	1	TRB:CAWSLDRGEVFF;TRA:CALGRGASSSFSKLVF
clone_1226_aK0	clonotype276aKO	1	TRB:CASLGGAETLYF;TRA:CAATGDSGGSNYKLTF
clone_1227_aK0	clonotype277aKO	1	TRB:CASSPPREGPGQLYF;TRB:CGAREGYSDYTF;TRA:CALSDQDTNTGKLTF
clone_1228_aK0	clonotype278aKO	1	TRB:CSSTGSSYEQYF;TRA:CAASEGYNVLYF
clone_1229_aK0	clonotype279aKO	1	TRB:CASSTAEVFF;TRA:CAARAGTGSNRLTF
clone_1230_aK0	clonotype280aKO	1	TRB:CASRTGQYF;TRB:CASSLAGSQNTLYF;TRA:CAGASSGSWQLIF
clone_1231_aK0	clonotype281aKO	1	TRB:CASSDGGTEVFF;TRA:CAASSGSNYQLIW
clone_1232_aK0	clonotype282aKO	1	TRB:CGARARRDTQYF;TRA:CAASGDSGTYQRF
clone_1233_aK0	clonotype283aKO	1	TRA:CAAGSNYQLIW
clone_1234_aK0	clonotype284aKO	1	TRA:CARASSGSWQLIF
clone_1235_aK0	clonotype285aKO	1	TRA:CAMEPANAYKVIF
clone_1236_aK0	clonotype286aKO	1	TRB:CASNANTEVFF
clone_1237_aK0	clonotype287aKO	1	TRB:CASTDWGEQFF
clone_1238_aK0	clonotype288aKO	1	TRB:CASQGGDTQYF
clone_1239_aK0	clonotype289aKO	1	TRB:CASVMDERLFF
clone_1240_aK0	clonotype290aKO	1	TRB:CASRKGGSEQYF
clone_1241_aK0	clonotype291aKO	1	TRB:CASSQEGTEVFF
clone_1242_aK0	clonotype292aKO	1	TRB:CASSQDNYEQYF
clone_1243_aK0	clonotype293aKO	1	TRB:CASSDDNYEQYF
clone_1244_aK0	clonotype294aKO	1	TRA:CAAVPGNTGKLIF
clone_1245_aK0	clonotype296aKO	1	TRA:CAAEAANTGKLTF
clone_1246_aK0	clonotype297aKO	1	TRB:CAWKLGGEETLYF
clone_1247_aK0	clonotype298aKO	1	TRB:CAWNWGNYAEQFF
clone_1248_aK0	clonotype299aKO	1	TRB:CAWNQGDYAEQFF
clone_1249_aK0	clonotype300aKO	1	TRB:CAWSPGGANEQYF
clone_1250_aK0	clonotype301aKO	1	TRB:CAWSPNSQNTLYF
clone_1251_aK0	clonotype302aKO	1	TRB:CAWSPYRGETLYF
clone_1252_aK0	clonotype303aKO	1	TRB:CAWSLRANSDYTF
clone_1253_aK0	clonotype304aKO	1	TRB:CAWSLEGGLEQYF
clone_1254_aK0	clonotype305aKO	1	TRB:CAWSLEGWAEVFF
clone_1255_aK0	clonotype306aKO	1	TRB:CAWSLWNYAEQFF
clone_1256_aK0	clonotype307aKO	1	TRB:CAWSLRGATEVFF
clone_1257_aK0	clonotype308aKO	1	TRB:CAWSLGDGNTLYF
clone_1258_aK0	clonotype309aKO	1	TRB:CAWSGTANTEVFF
clone_1259_aK0	clonotype310aKO	1	TRB:CAWIQDSQNTLYF
clone_1260_aK0	clonotype311aKO	1	TRB:CAWGDWDYAEQFF
clone_1261_aK0	clonotype312aKO	1	TRB:CAWSSTYNSPLYF
clone_1262_aK0	clonotype313aKO	1	TRB:CASSFYAEQFF
clone_1263_aK0	clonotype314aKO	1	TRB:CASSQGTYEQYF
clone_1264_aK0	clonotype315aKO	1	TRB:CASSDDRYEQYF
clone_1265_aK0	clonotype316aKO	1	TRB:CASSVRKNTLYF
clone_1266_aK0	clonotype317aKO	1	TRB:CASGDAKDTQYF
clone_1267_aK0	clonotype318aKO	1	TRB:CASSRDRNAEQFF
clone_1268_aK0	clonotype319aKO	1	TRB:CASSDDRNTEVFF
clone_1269_aK0	clonotype321aKO	1	TRB:CASSNWGSDEQYF
clone_1270_aK0	clonotype322aKO	1	TRB:CASSHRSAETLYF
clone_1271_aK0	clonotype323aKO	1	TRB:CASSEQKNTEVFF
clone_1272_aK0	clonotype324aKO	1	TRB:CASSDAQGGEQFF
clone_1273_aK0	clonotype325aKO	1	TRB:CASSDAGLYEQYF
clone_1274_aK0	clonotype326aKO	1	TRB:CASSDGRDERLFF
clone_1275_aK0	clonotype327aKO	1	TRB:CASGGTHNTEVFF
clone_1276_aK0	clonotype328aKO	1	TRB:CASSQRDEQYF
clone_1277_aK0	clonotype329aKO	1	TRB:CSSSTGSGNTLYF
clone_1278_aK0	clonotype331aKO	1	TRB:CGASREKNTEVFF
clone_1279_aK0	clonotype332aKO	1	TRB:CGASRDSRSDYTF
clone_1280_aK0	clonotype333aKO	1	TRB:CGARTASAETLYF
clone_1281_aK0	clonotype334aKO	1	TRB:CGARDWGVYEQYF
clone_1282_aK0	clonotype335aKO	1	TRB:CGAHWGSAETLYF
clone_1283_aK0	clonotype336aKO	1	TRB:CGARTGGVAEQFF
clone_1284_aK0	clonotype337aKO	1	TRB:CGAWTGYQDTQYF
clone_1285_aK0	clonotype339aKO	1	TRB:CGAGGGRQNTLYF;TRA:CAISNNRIFF
clone_1286_aK0	clonotype341aKO	1	TRB:CASSGTKYEQYF;TRA:CAAEEGGRALIF
clone_1287_aK0	clonotype342aKO	1	TRB:CASSETGNTEVFF;TRA:CATDASGSWQLIF
clone_1288_aK0	clonotype344aKO	1	TRB:CASSPLDRGVEQYF;TRB:CGARDPDSYEQYF;TRA:CAINYSNNRLTL
clone_1289_aK0	clonotype345aKO	1	TRB:CGARDLANSDYTF;TRA:CAMGTGGYKVVF
clone_1290_aK0	clonotype346aKO	1	TRB:CAWSLGDNSPLYF;TRA:CAAASSGSWQLIF
clone_1291_aK0	clonotype347aKO	1	TRB:CAWSLGDQDTQYF;TRA:CAPNSGGSNAKLTF
clone_1292_aK0	clonotype348aKO	1	TRB:CASSDREETLYF;TRA:CALATGNTGKLIF
clone_1293_aK0	clonotype350aKO	1	TRB:CASRGVGENTLYF;TRB:CASSLDGGWNQNTLYF;TRA:CALLHDTNAYKVIF
clone_1294_aK0	clonotype351aKO	1	TRB:CASSDGYSYEQYF;TRA:CAIASSSFSKLVF
clone_1295_aK0	clonotype352aKO	1	TRB:CASSQRGEVFF;TRA:CAIRMDSNYQLIW
clone_1296_aK0	clonotype353aKO	1	TRB:CGAREGVSYEQYF;TRA:CAASEEDYANKMIF;TRA:CAVNSNNRIFF
clone_1297_aK0	clonotype354aKO	1	TRB:CASSDRNSDYTF;TRA:CAVRNSNNRIFF
clone_1298_aK0	clonotype355aKO	1	TRB:CASSDRSYEQYF;TRA:CAARDSNYQLIW
clone_1299_aK0	clonotype356aKO	1	TRB:CASSDGQKDTQYF;TRA:CAMNYNQGKLIF
clone_1300_aK0	clonotype357aKO	1	TRB:CASSADRGRTLYF;TRA:CILRARASSSFSKLVF
clone_1301_aK0	clonotype358aKO	1	TRB:CASSVGGGNTLYF;TRA:CAGTGGNNKLTF
clone_1302_aK0	clonotype359aKO	1	TRB:CGAREGKDTEVFF;TRA:CAVSRSNNRIFF
clone_1303_aK0	clonotype360aKO	1	TRB:CGAGGQGNSDYTF;TRA:CAENYNQGKLIF
clone_1304_aK0	clonotype361aKO	1	TRB:CASRGRGSQYF;TRA:CAASAHSNYQLIW;TRA:CAVSATDNYAQGLTF
clone_1305_aK0	clonotype362aKO	1	TRB:CAWTWGGQNTLYF;TRA:CAVRRSALGRLHF
clone_1306_aK0	clonotype363aKO	1	TRB:CAWSGQNNQAPLF;TRA:CALSNYGNEKITF
clone_1307_aK0	clonotype364aKO	1	TRB:CASSDRGNTLYF;TRA:CAAEGAGANTGKLTF
clone_1308_aK0	clonotype365aKO	1	TRB:CGAGGGRQNTLYF;TRA:CAVRGNMGYKLTF
clone_1309_aK0	clonotype366aKO	1	TRB:CASLGGAGQLYF;TRA:CAARVTGNTGKLIF
clone_1310_aK0	clonotype367aKO	1	TRB:CASGDINSDYTF;TRA:CAASHDTNAYKVIF
clone_1311_aK0	clonotype368aKO	1	TRB:CSSRRTNSYEQYF;TRA:CAASLASNYNVLYF
clone_1312_aK0	clonotype369aKO	1	TRB:CGARPSVNSDYTF;TRA:CAPRNYNQGKLIF;TRA:CVLKTGNTGKLIF
clone_1313_aK0	clonotype370aKO	1	TRB:CGARDNSGNTLYF;TRA:CAASWGTGGYKVVF
clone_1314_aK0	clonotype371aKO	1	TRB:CGAADRSYAEQFF;TRA:CVLSAYSNNRIFF
clone_1315_aK0	clonotype372aKO	1	TRB:CAWSDRANTEVFF;TRA:CAASFLAKGKLIF
clone_1316_aK0	clonotype373aKO	1	TRB:CAWSLQGNSDYTF;TRA:CALFNTGNYKYVF
clone_1317_aK0	clonotype374aKO	1	TRB:CASRDRGGAEQFF;TRA:CAASERIGSFNKLTF
clone_1318_aK0	clonotype375aKO	1	TRB:CASSDTGKNTLYF;TRA:CAAVGANSAGNKLTF
clone_1319_aK0	clonotype376aKO	1	TRB:CGASGTKNTEVFF;TRA:CALRVYQGGRALIF
clone_1320_aK0	clonotype377aKO	1	TRB:CAWSLGSAETLYF;TRA:CAARSGGSNAKLTF;TRA:CALVSMDYANKMIF
clone_1321_aK0	clonotype378aKO	1	TRB:CASSDAGNYEQYF;TRA:CAVSGGYSNNRLTL
clone_1322_aK0	clonotype379aKO	1	TRB:CGARTGGAGEQYF;TRA:CALGGMGYKLTF
clone_1323_aK0	clonotype380aKO	1	TRB:CGARRHLNSDYTF;TRA:CAAQNLTGANTGKLTF
clone_1324_aK0	clonotype382aKO	1	TRB:CGARDADSDTQYF;TRA:CAASVTNSAGNKLTF
clone_1325_aK0	clonotype383aKO	1	TRB:CAWSQGQNTEVFF;TRA:CAMRERDTGNYKYVF
clone_1326_aK0	clonotype384aKO	1	TRB:CAWSPGSQNTLYF;TRA:CALGSNYGSSGNKLIF
clone_1327_aK0	clonotype385aKO	1	TRB:CGARRTVNTEVFF;TRA:CALGMNYNQGKLIF
clone_1328_aK0	clonotype387aKO	1	TRB:CASSIEGTGDTEVFF;TRB:CGALQGRKNTLYF;TRA:CALDPGTGGYKVVF
clone_1329_aK0	clonotype388aKO	1	TRB:CAWSTGEGSDYTF;TRA:CAARSNNRIFF
clone_1330_aK0	clonotype389aKO	1	TRB:CASSDQGNTEVFF;TRA:CAAMSNYNVLYF
clone_1331_aK0	clonotype390aKO	1	TRB:CAWRPGANTEVFF;TRA:CAASAGVVGQLTF
clone_1332_aK0	clonotype391aKO	1	TRB:CASSSDETLYF;TRA:CAASEVGYKLTF
clone_1333_aK0	clonotype393aKO	1	TRB:CASGDYTYEQYF;TRA:CAASGSSGSWQLIF
clone_1334_aK0	clonotype394aKO	1	TRB:CASGGLGDEQYF;TRA:CAASPSGYNKLTF
clone_1335_aK0	clonotype395aKO	1	TRB:CASGGSGNPLYF;TRA:CAASENTNTGKLTF
clone_1336_aK0	clonotype396aKO	1	TRB:CASSDPGQGGAETLYF;TRB:CGARETGQDTQYF;TRA:CAASVAGMGYKLTF
clone_1337_aK0	clonotype397aKO	1	TRB:CASSRTGASQNTLYF;TRB:CASSVDRGREQYF;TRA:CAASVDYNQGKLIF
clone_1338_aK0	clonotype398aKO	1	TRB:CAWIQNNNQAPLF;TRA:CAASEANSAGNKLTF
clone_1339_aK0	clonotype399aKO	1	TRB:CASSADRGRTLYF;TRA:CALSRSGGSNYKLTF
clone_1340_aK0	clonotype400aKO	1	TRA:CATSSNTNKVVF
clone_1341_aK0	clonotype401aKO	1	TRA:CAASNMGYKLTF
clone_1342_aK0	clonotype402aKO	1	TRA:CAARTNAYKVIF
clone_1343_aK0	clonotype404aKO	1	TRB:CASSPQNTEVFF
clone_1344_aK0	clonotype406aKO	1	TRB:CASSGDRNTLYF
clone_1345_aK0	clonotype407aKO	1	TRB:CASSQEANTEVFF
clone_1346_aK0	clonotype408aKO	1	TRB:CASSQDEGTEVFF
clone_1347_aK0	clonotype409aKO	1	TRB:CASSQGLQDTQYF
clone_1348_aK0	clonotype410aKO	1	TRB:CASSLHRGGTLYF
clone_1349_aK0	clonotype412aKO	1	TRB:CASSSGRNTEVFF
clone_1350_aK0	clonotype413aKO	1	TRA:CAAAANYGNEKITF
clone_1351_aK0	clonotype414aKO	1	TRA:CAAFSGGSNAKLTF
clone_1352_aK0	clonotype415aKO	1	TRA:CAAEAYQGGRALIF
clone_1353_aK0	clonotype416aKO	1	TRA:CAAEVTEGADRLTF
clone_1354_aK0	clonotype417aKO	1	TRA:CAVRGSSAGNKLTF
clone_1355_aK0	clonotype418aKO	1	TRB:CAYPPGQGNERLFF
clone_1356_aK0	clonotype419aKO	1	TRB:CAWRDWGSAETLYF
clone_1357_aK0	clonotype420aKO	1	TRB:CAWRGTGGHERLFF
clone_1358_aK0	clonotype421aKO	1	TRB:CAWSPGLGNYEQYF
clone_1359_aK0	clonotype422aKO	1	TRB:CAWSPRGGYAEQFF
clone_1360_aK0	clonotype423aKO	1	TRB:CAWSRGQGAPDYTF
clone_1361_aK0	clonotype424aKO	1	TRB:CAWSLGQGAVEQFF
clone_1362_aK0	clonotype425aKO	1	TRB:CAWSLGLDSYEQYF
clone_1363_aK0	clonotype426aKO	1	TRB:CAWSLRGPGNTLYF
clone_1364_aK0	clonotype427aKO	1	TRB:CAWSLHRGDSDYTF
clone_1365_aK0	clonotype428aKO	1	TRB:CAWSLEGATYEQYF
clone_1366_aK0	clonotype429aKO	1	TRB:CAWSLDRAGNTLYF
clone_1367_aK0	clonotype430aKO	1	TRB:CASSLRGEQYF
clone_1368_aK0	clonotype431aKO	1	TRB:CASSLDAEQFF
clone_1369_aK0	clonotype432aKO	1	TRB:CASSRDRRTLYF
clone_1370_aK0	clonotype433aKO	1	TRB:CASSREGNTLYF
clone_1371_aK0	clonotype434aKO	1	TRB:CASSPGWEQYF
clone_1372_aK0	clonotype435aKO	1	TRB:CASSYQDTQYF
clone_1373_aK0	clonotype436aKO	1	TRB:CASSLDREQYF
clone_1374_aK0	clonotype437aKO	1	TRB:CASSLAGEVFF
clone_1375_aK0	clonotype438aKO	1	TRB:CASSLVGTLYF
clone_1376_aK0	clonotype439aKO	1	TRB:CASSFLTEQFF
clone_1377_aK0	clonotype440aKO	1	TRB:CASSLHAEQFF
clone_1378_aK0	clonotype441aKO	1	TRB:CASTRGNYAEQFF
clone_1379_aK0	clonotype442aKO	1	TRB:CASRGQANSDYTF
clone_1380_aK0	clonotype443aKO	1	TRB:CASRGTGQDTQYF
clone_1381_aK0	clonotype444aKO	1	TRB:CASSTGGGDTQYF
clone_1382_aK0	clonotype445aKO	1	TRB:CASSDWGFYEQYF
clone_1383_aK0	clonotype446aKO	1	TRB:CASSDKNTGQLYF
clone_1384_aK0	clonotype447aKO	1	TRB:CASSDRGAERLFF
clone_1385_aK0	clonotype449aKO	1	TRB:CASSDSGRHTQYF
clone_1386_aK0	clonotype451aKO	1	TRB:CASSGPNYAEQFF
clone_1387_aK0	clonotype452aKO	1	TRB:CASGDGNYAEQFF
clone_1388_aK0	clonotype454aKO	1	TRB:CASGEGGADTQYF
clone_1389_aK0	clonotype455aKO	1	TRB:CASGDDWGDTQYF
clone_1390_aK0	clonotype456aKO	1	TRB:CASGVRANSDYTF
clone_1391_aK0	clonotype457aKO	1	TRB:CASGVRANSDYTF
clone_1392_aK0	clonotype458aKO	1	TRB:CASGVRANSDYTF
clone_1393_aK0	clonotype459aKO	1	TRB:CASGVRANSDYTF
clone_1394_aK0	clonotype460aKO	1	TRB:CASSVTPSQNTLYF
clone_1395_aK0	clonotype461aKO	1	TRB:CASRHWGSAETLYF
clone_1396_aK0	clonotype462aKO	1	TRB:CASRRDRTIYEQYF
clone_1397_aK0	clonotype464aKO	1	TRB:CASSTSGNYAEQFF
clone_1398_aK0	clonotype465aKO	1	TRB:CASSPQGANTEVFF
clone_1399_aK0	clonotype466aKO	1	TRB:CASSLRDRDAEQFF
clone_1400_aK0	clonotype467aKO	1	TRB:CASSEQGGDTEVFF
clone_1401_aK0	clonotype468aKO	1	TRB:CASSEGAGSDTQYF
clone_1402_aK0	clonotype469aKO	1	TRB:CASSDHYSGNTLYF
clone_1403_aK0	clonotype470aKO	1	TRB:CASSDGTGNSDYTF
clone_1404_aK0	clonotype471aKO	1	TRB:CASSDGTGNSDYTF
clone_1405_aK0	clonotype472aKO	1	TRB:CASSDTDSGNTLYF
clone_1406_aK0	clonotype473aKO	1	TRB:CASSDPGLGESQYF
clone_1407_aK0	clonotype474aKO	1	TRB:CASSDLGGAREQYF
clone_1408_aK0	clonotype475aKO	1	TRB:CASSDAGQNSDYTF
clone_1409_aK0	clonotype476aKO	1	TRB:CASSAWGRDAEQFF
clone_1410_aK0	clonotype477aKO	1	TRB:CASSGQGTGNTLYF
clone_1411_aK0	clonotype478aKO	1	TRB:CASSQVGHEVFF
clone_1412_aK0	clonotype479aKO	1	TRB:CASSYRGREQYF
clone_1413_aK0	clonotype480aKO	1	TRB:CASSWNFYEQYF
clone_1414_aK0	clonotype481aKO	1	TRB:CASSQDSTEVFF
clone_1415_aK0	clonotype482aKO	1	TRB:CGASDWGGQNTLYF
clone_1416_aK0	clonotype483aKO	1	TRB:CGAKTGTSNERLFF
clone_1417_aK0	clonotype484aKO	1	TRB:CGARRDWGAGEQYF
clone_1418_aK0	clonotype485aKO	1	TRB:CGAREGGSGNTLYF
clone_1419_aK0	clonotype486aKO	1	TRB:CGARDRGHHERLFF
clone_1420_aK0	clonotype487aKO	1	TRB:CGARDLTGSERLFF
clone_1421_aK0	clonotype488aKO	1	TRB:CGARDWGPNTEVFF
clone_1422_aK0	clonotype489aKO	1	TRB:CAWTPTGGVYEQYF;TRA:CAYTNTGKLTF
clone_1423_aK0	clonotype490aKO	1	TRB:CASGDYYAEQFF;TRA:CAADYSNNRLTL
clone_1424_aK0	clonotype491aKO	1	TRB:CASSQTSQNTLYF;TRA:CAPDTNAYKVIF
clone_1425_aK0	clonotype492aKO	1	TRB:CASSQDAGGEQYF;TRA:CAVSANRIFF
clone_1426_aK0	clonotype493aKO	1	TRB:CASGETGNTEVFF;TRA:CALGESSGSWQLIF;TRA:CAMDSAGNKLTF
clone_1427_aK0	clonotype494aKO	1	TRB:CASSRDYYEQYF;TRA:CAIGSGYNKLTF;TRA:CAPHQGGRALIF
clone_1428_aK0	clonotype495aKO	1	TRB:CASSYTRGEQYF;TRA:CAFNNYAQGLTF
clone_1429_aK0	clonotype496aKO	1	TRB:CGARPRDRSYEQYF;TRA:CAVSGGNNKLTF
clone_1430_aK0	clonotype497aKO	1	TRB:CASSFDNPNSDYTF;TRB:CASSPGQADTQYF;TRA:CAARPGSNNRIFF
clone_1431_aK0	clonotype498aKO	1	TRB:CAWSPGHLNERLFF;TRA:CAVDYANKMIF
clone_1432_aK0	clonotype499aKO	1	TRB:CAWSLMVANSDYTF;TRA:CAIGRNSNNRIFF
clone_1433_aK0	clonotype500aKO	1	TRB:CASSDSRHQAPLF;TRA:CAAITGNTGKLIF
clone_1434_aK0	clonotype501aKO	1	TRB:CASSRQGANERLFF;TRA:CAIESGSFNKLTF
clone_1435_aK0	clonotype503aKO	1	TRB:CSSREGQGYAEQFF;TRA:CAADSGGNYKPTF
clone_1436_aK0	clonotype505aKO	1	TRB:CASSQDWVYEQYF;TRA:CALEPGGSNAKLTF
clone_1437_aK0	clonotype506aKO	1	TRB:CAWSRDNANSDYTF;TRA:CAPINDSGYNKLTF
clone_1438_aK0	clonotype507aKO	1	TRB:CASSFGDEQYF;TRA:CAVPNYAQGLTF
clone_1439_aK0	clonotype508aKO	1	TRB:CASRQNSGNTLYF;TRA:CADMATGGNNKLTF
clone_1440_aK0	clonotype510aKO	1	TRB:CASSDNIAETLYF;TRA:CAAELTGNTGKLIF
clone_1441_aK0	clonotype511aKO	1	TRB:CASRNRDRGDEQYF;TRA:CAAEGWSNYNVLYF;TRA:CAIRYDTNAYKVIF
clone_1442_aK0	clonotype512aKO	1	TRB:CASSEGTGGTEVFF;TRA:CALDLSSNTNKVVF
clone_1443_aK0	clonotype513aKO	1	TRB:CASSDGGKNTEVFF;TRA:CAVSNYAQGLTF
clone_1444_aK0	clonotype514aKO	1	TRB:CASSARDNYAEQFF;TRA:CAVNTNTGKLTF
clone_1445_aK0	clonotype515aKO	1	TRB:CASSPMGERLFF;TRA:CAVSASNNRIFF
clone_1446_aK0	clonotype516aKO	1	TRB:CASSYRDTEVFF;TRA:CAVSSYAQGLTF
clone_1447_aK0	clonotype517aKO	1	TRB:CASSLLTIDTQYF;TRB:CGARDWGGAETLYF;TRA:CALERDTGYQNFYF
clone_1448_aK0	clonotype518aKO	1	TRB:CASSDIGGQDTQYF;TRB:CASSFGRGEQYF;TRA:CAAGIYGSSGNKLIF;TRA:CVVGDRGSALGRLHF
clone_1449_aK0	clonotype519aKO	1	TRB:CASGQGQNTLYF;TRA:CAMSEQGGRALIF
clone_1450_aK0	clonotype520aKO	1	TRB:CAWSLGQTNTEVFF;TRA:CALSHQGGRALIF
clone_1451_aK0	clonotype521aKO	1	TRB:CAWSLGQSQNTLYF;TRA:CAVRAANTGKLTF
clone_1452_aK0	clonotype522aKO	1	TRB:CAWSSGQGNSPLYF;TRA:CALRGSALGRLHF
clone_1453_aK0	clonotype523aKO	1	TRB:CASSPLKYEQYF;TRA:CAVTGTGSNRLTF
clone_1454_aK0	clonotype524aKO	1	TRB:CGARGHSYNSPLYF;TRA:CAVSIPGNYKYVF
clone_1455_aK0	clonotype525aKO	1	TRB:CACRDWGVAETLYF;TRA:CAVTPTGNTGKLIF
clone_1456_aK0	clonotype527aKO	1	TRB:CAWSLQGVSYEQYF;TRA:CALSPNSAGNKLTF
clone_1457_aK0	clonotype528aKO	1	TRB:CAWMGQVSNERLFF;TRA:CAASRVGDNSKLIW
clone_1458_aK0	clonotype529aKO	1	TRB:CASSLDAEQFF;TRA:CAMRDQGGGYKVVF
clone_1459_aK0	clonotype530aKO	1	TRB:CASSDMGPSDYTF;TRA:CAVSASSGSWQLIF
clone_1460_aK0	clonotype531aKO	1	TRB:CASSDRRGREQYF;TRA:CAVYNAGAKLTF
clone_1461_aK0	clonotype532aKO	1	TRB:CASSDLGGNEQYF;TRA:CAALPGTGSNRLTF
clone_1462_aK0	clonotype535aKO	1	TRB:CASSDRDKNSDYTF;TRA:CAPDMGYKLTF
clone_1463_aK0	clonotype536aKO	1	TRB:CASSDLDNNERLFF;TRA:CALITGNTGKLIF
clone_1464_aK0	clonotype537aKO	1	TRB:CASSPYNSPLYF;TRA:CAVSASSNNRIFF
clone_1465_aK0	clonotype538aKO	1	TRB:CASSSYQDTQYF;TRA:CAVSAQTNTGKLTF
clone_1466_aK0	clonotype539aKO	1	TRB:CASSLQANSDYTF;TRB:CASSSSQNTLYF;TRA:CAVSANQGGRALIF
clone_1467_aK0	clonotype540aKO	1	TRB:CASGSTGGSYEQYF;TRB:CAWSPGTGGYEQYF;TRA:CAARDYSNNRLTL;TRA:CAASGGNMGYKLTF
clone_1468_aK0	clonotype541aKO	1	TRB:CAWSPGLGGLEQYF;TRA:CALGFASALTF
clone_1469_aK0	clonotype542aKO	1	TRB:CAWSLARANTEVFF;TRA:CATEKITGNTGKLIF
clone_1470_aK0	clonotype543aKO	1	TRB:CASSVPGQSNSDYTF;TRB:CAWSLGGAPAEQFF;TRA:CAASETTASLGKLQF
clone_1471_aK0	clonotype544aKO	1	TRB:CAWSLWGGQDTQYF;TRA:CAVSASTNAYKVIF
clone_1472_aK0	clonotype545aKO	1	TRB:CASSGQRDERLFF;TRA:CALSAHWGGNYKPTF
clone_1473_aK0	clonotype546aKO	1	TRB:CASSGTGVFEQYF;TRA:CAVSAPGNTGKLIF
clone_1474_aK0	clonotype547aKO	1	TRB:CASGDTPNSDYTF;TRA:CALGSSNTNKVVF
clone_1475_aK0	clonotype548aKO	1	TRB:CASGDAQNERLFF;TRA:CAASTTGYQNFYF;TRA:CALSELIQTGFASALTF
clone_1476_aK0	clonotype549aKO	1	TRB:CASSPLGNYAEQFF;TRA:CATEGTNSAGNKLTF
clone_1477_aK0	clonotype550aKO	1	TRB:CASSRGNSDYTF;TRA:CAVSMENYNQGKLIF
clone_1478_aK0	clonotype552aKO	1	TRB:CGARDGGNQNTLYF;TRA:CALSENYAQGLTF
clone_1479_aK0	clonotype554aKO	1	TRB:CASSIGQGAKVFF;TRB:CASSRDPTEVFF;TRA:CALSDDTNAYKVIF
clone_1480_aK0	clonotype555aKO	1	TRB:CASSLDNQAPLF;TRA:CAASTGGLSGKLTF
clone_1481_aK0	clonotype556aKO	1	TRB:CASRGGTTGQLYF;TRA:CAASVGSAGNKLTF
clone_1482_aK0	clonotype557aKO	1	TRB:CAWTGQGGAETLYF;TRA:CALSARYSNNRLTL
clone_1483_aK0	clonotype558aKO	1	TRB:CAWRTGGMDAEQFF;TRB:CSSTPGHANTEVFF;TRA:CALRGGSNAKLTF
clone_1484_aK0	clonotype560aKO	1	TRB:CASSLENTLYF;TRA:CALGDGNYQLIW
clone_1485_aK0	clonotype561aKO	1	TRB:CASSDWGGGTQYF;TRA:CALGIGDYANKMIF
clone_1486_aK0	clonotype562aKO	1	TRB:CASSGQGDSDYTF;TRA:CASTHTNAYKVIF
clone_1487_aK0	clonotype563aKO	1	TRB:CGARDWGNYAEQFF;TRA:CALKSNTGYQNFYF
clone_1488_aK0	clonotype564aKO	1	TRB:CGARGQNNYAEQFF;TRA:CALKDTNAYKVIF
clone_1489_aK0	clonotype565aKO	1	TRB:CASSQDWGDEQYF;TRA:CALGDHSNNRIFF
clone_1490_aK0	clonotype566aKO	1	TRB:CASSRDQGEQYF;TRA:CALSDRYNQGKLIF
clone_1491_aK0	clonotype567aKO	1	TRB:CASTPGSGNTLYF;TRA:CVVGDRGSALGRLHF
clone_1492_aK0	clonotype568aKO	1	TRB:CASSGGANTEVFF;TRA:CALGNYNQGKLIF
clone_1493_aK0	clonotype570aKO	1	TRB:CAWNRQGANSDYTF;TRA:CALGDQGGNYKPTF
clone_1494_aK0	clonotype571aKO	1	TRB:CAWSLGTGSYEQYF;TRA:CALRMATGGNNKLTF
clone_1495_aK0	clonotype572aKO	1	TRB:CASSRGDTQYF;TRA:CALSDWGSALGRLHF
clone_1496_aK0	clonotype573aKO	1	TRB:CASSLGGNQDTQYF;TRA:CALGDQTNTGKLTF
clone_1497_aK0	clonotype574aKO	1	TRB:CASSQGQGLGGGYNYAEQFF;TRB:CASSQVGGDTQYF;TRA:CALGETTASLGKLQF
clone_1498_aK0	clonotype575aKO	1	TRB:CASSRDWGYEQYF;TRA:CAAGEDANKMIF
clone_1499_aK0	clonotype576aKO	1	TRB:CASSLGREQYF;TRA:CALSAVYGSSGNKLIF
clone_1500_aK0	clonotype578aKO	1	TRB:CAWSPGTGPYEQYF;TRA:CAASSNNRIFF
clone_1501_aK0	clonotype579aKO	1	TRB:CAWSLGGSNERLFF;TRA:CAASEGNYQLIW
clone_1502_aK0	clonotype580aKO	1	TRB:CAWGTGGAQNTLYF;TRA:CAMRDVNVGDNSKLIW
clone_1503_aK0	clonotype581aKO	1	TRB:CASSGGTEQFF;TRA:CAMREPTSGGNYKPTF
clone_1504_aK0	clonotype582aKO	1	TRB:CASKDRQFYEQYF;TRA:CALGDRGGSALGRLHF
clone_1505_aK0	clonotype583aKO	1	TRB:CASSPTGNTLYF;TRA:CAAGSGGNNKLTF
clone_1506_aK0	clonotype585aKO	1	TRB:CAWSRTVSNERLFF;TRA:CAAGGVNTGNYKYVF
clone_1507_aK0	clonotype586aKO	1	TRB:CASSQEFGEQYF;TRA:CAASRGNYAQGLTF
clone_1508_aK0	clonotype587aKO	1	TRB:CAWSPRDWGDEQYF;TRA:CAASDSTGYQNFYF
clone_1509_aK0	clonotype588aKO	1	TRB:CASSLLNTLYF;TRA:CAASASSALGRLHF
clone_1510_aK0	clonotype589aKO	1	TRB:CAWSPGLGVYEQYF;TRA:CAASRGSSNTNKVVF
clone_1511_aK0	clonotype590aKO	1	TRB:CAWSRDRSGNTLYF;TRA:CALSPITGNTGKLIF
clone_1512_aK0	clonotype591aKO	1	TRA:CAARDTNAYKVIF
clone_1513_aK0	clonotype592aKO	1	TRA:CAVSLNNNNAPRF
clone_1514_aK0	clonotype593aKO	1	TRA:CAVSMTNNNAPRF
clone_1515_aK0	clonotype594aKO	1	TRA:CAVSLTGGYKVVF
clone_1516_aK0	clonotype596aKO	1	TRA:CALSDPSNNRIFF
clone_1517_aK0	clonotype598aKO	1	TRB:CASSPGSAETLYF
clone_1518_aK0	clonotype599aKO	1	TRB:CASSLRRYAEQFF
clone_1519_aK0	clonotype600aKO	1	TRB:CASSLRGNSDYTF
clone_1520_aK0	clonotype601aKO	1	TRB:CASRPGGANTEVFF
clone_1521_aK0	clonotype602aKO	1	TRB:CASRPGGANTEVFF
clone_1522_aK0	clonotype603aKO	1	TRB:CASRPGGANTEVFF
clone_1523_aK0	clonotype604aKO	1	TRB:CASSQEGNQDTQYF
clone_1524_aK0	clonotype605aKO	1	TRB:CASSQDRVYAEQFF
clone_1525_aK0	clonotype606aKO	1	TRB:CASSQENGGYEQYF
clone_1526_aK0	clonotype607aKO	1	TRB:CASSQEGNQDTQYF
clone_1527_aK0	clonotype608aKO	1	TRB:CASSQEGGGNTLYF
clone_1528_aK0	clonotype609aKO	1	TRB:CASSQDGKNTEVFF
clone_1529_aK0	clonotype610aKO	1	TRB:CASSQARVNTEVFF
clone_1530_aK0	clonotype611aKO	1	TRB:CASSQGGYNSPLYF
clone_1531_aK0	clonotype612aKO	1	TRB:CASSQGGSGNTLYF
clone_1532_aK0	clonotype613aKO	1	TRB:CASSPDRGGNTLYF
clone_1533_aK0	clonotype614aKO	1	TRB:CASSPHNNQDTQYF
clone_1534_aK0	clonotype615aKO	1	TRB:CASSPRQAGNTLYF
clone_1535_aK0	clonotype616aKO	1	TRB:CASSRWGSAETLYF
clone_1536_aK0	clonotype617aKO	1	TRB:CASSSRLGTYEQYF
clone_1537_aK0	clonotype618aKO	1	TRA:CAVSSSNTNKVVF
clone_1538_aK0	clonotype619aKO	1	TRA:CAVASSGSWQLIF
clone_1539_aK0	clonotype620aKO	1	TRB:CAWRPPPGTENTLYF
clone_1540_aK0	clonotype621aKO	1	TRB:CAWSPLGQGVERLFF
clone_1541_aK0	clonotype622aKO	1	TRB:CAWSPGLGVSYEQYF
clone_1542_aK0	clonotype623aKO	1	TRB:CAWSRLQVSNERLFF
clone_1543_aK0	clonotype624aKO	1	TRB:CAWSRLQVSNERLFF
clone_1544_aK0	clonotype625aKO	1	TRB:CAWSRLQVSNERLFF
clone_1545_aK0	clonotype626aKO	1	TRB:CAWSLGGGHAETLYF
clone_1546_aK0	clonotype627aKO	1	TRB:CAWSLGWGGAETLYF
clone_1547_aK0	clonotype628aKO	1	TRB:CAWSLAGRVYAEQFF
clone_1548_aK0	clonotype629aKO	1	TRB:CASSYGTETLYF
clone_1549_aK0	clonotype630aKO	1	TRB:CASSYTDAEQFF
clone_1550_aK0	clonotype631aKO	1	TRB:CASSSDGNTLYF
clone_1551_aK0	clonotype632aKO	1	TRB:CASSLRRYEQYF
clone_1552_aK0	clonotype633aKO	1	TRB:CASSLEKNTLYF
clone_1553_aK0	clonotype634aKO	1	TRB:CASSLDDQAPLF
clone_1554_aK0	clonotype635aKO	1	TRB:CASSLGKDTQYF
clone_1555_aK0	clonotype636aKO	1	TRB:CASSLGGNTLYF
clone_1556_aK0	clonotype637aKO	1	TRB:CASSLEQDTQYF
clone_1557_aK0	clonotype638aKO	1	TRB:CASRTVSYEQYF
clone_1558_aK0	clonotype639aKO	1	TRB:CASRTGTGGRVFF
clone_1559_aK0	clonotype640aKO	1	TRB:CASRTGTGGRVFF
clone_1560_aK0	clonotype641aKO	1	TRB:CASSQGGREQYF
clone_1561_aK0	clonotype642aKO	1	TRB:CASSLKNTEVFF
clone_1562_aK0	clonotype643aKO	1	TRB:CASSLSAETLYF
clone_1563_aK0	clonotype644aKO	1	TRB:CASSLPGSDYTF
clone_1564_aK0	clonotype645aKO	1	TRB:CASSLSQYEQYF
clone_1565_aK0	clonotype649aKO	1	TRB:CASSLNSYEQYF
clone_1566_aK0	clonotype650aKO	1	TRB:CASSLSAETLYF
clone_1567_aK0	clonotype651aKO	1	TRB:CASRQGRGQNTLYF
clone_1568_aK0	clonotype652aKO	1	TRB:CASRLGGGQDTQYF
clone_1569_aK0	clonotype653aKO	1	TRB:CASSRQGSNERLFF
clone_1570_aK0	clonotype654aKO	1	TRB:CASRDRATNTEVFF
clone_1571_aK0	clonotype655aKO	1	TRB:CASSPGQNYAEQFF
clone_1572_aK0	clonotype657aKO	1	TRB:CASSPGQNYAEQFF
clone_1573_aK0	clonotype658aKO	1	TRB:CASSERDNNERLFF
clone_1574_aK0	clonotype659aKO	1	TRB:CASSEMGNYAEQFF
clone_1575_aK0	clonotype660aKO	1	TRB:CASSDRGRYTEVFF
clone_1576_aK0	clonotype661aKO	1	TRB:CASSDWGSAETLYF
clone_1577_aK0	clonotype662aKO	1	TRB:CASSEEGSNERLFF
clone_1578_aK0	clonotype663aKO	1	TRB:CASSDRGLGNTLYF
clone_1579_aK0	clonotype664aKO	1	TRB:CASSDGGPNTEVFF
clone_1580_aK0	clonotype665aKO	1	TRB:CASSGQGYNSPLYF
clone_1581_aK0	clonotype666aKO	1	TRB:CASSGTGGKDTQYF
clone_1582_aK0	clonotype667aKO	1	TRB:CASSVRDSGNTLYF
clone_1583_aK0	clonotype668aKO	1	TRB:CASSSGGYQDTQYF
clone_1584_aK0	clonotype669aKO	1	TRB:CASGGLGGIYEQYF
clone_1585_aK0	clonotype670aKO	1	TRB:CASGDNWVQNTLYF
clone_1586_aK0	clonotype671aKO	1	TRB:CASGDDRGRDTQYF
clone_1587_aK0	clonotype672aKO	1	TRB:CASGEDNSNERLFF
clone_1588_aK0	clonotype673aKO	1	TRB:CASGDRLGGETLYF
clone_1589_aK0	clonotype674aKO	1	TRB:CASGDGGTGNTLYF
clone_1590_aK0	clonotype675aKO	1	TRB:CASGDGLLWAEQFF
clone_1591_aK0	clonotype676aKO	1	TRB:CASGGLGSAETLYF
clone_1592_aK0	clonotype677aKO	1	TRB:CASRRLGGNYAEQFF
clone_1593_aK0	clonotype678aKO	1	TRB:CASSDRPNSGNTLYF
clone_1594_aK0	clonotype679aKO	1	TRB:CASSGGGAPGNTLYF
clone_1595_aK0	clonotype680aKO	1	TRB:CASSPGTISNERLFF
clone_1596_aK0	clonotype681aKO	1	TRB:CASSELGSSSYEQYF
clone_1597_aK0	clonotype683aKO	1	TRB:CASSERGQSSYEQYF
clone_1598_aK0	clonotype684aKO	1	TRB:CASSDPGQGGQAPLF
clone_1599_aK0	clonotype685aKO	1	TRB:CASSDAAENTGQLYF
clone_1600_aK0	clonotype686aKO	1	TRB:CASSDGTEDTGQLYF
clone_1601_aK0	clonotype687aKO	1	TRB:CASSDGTGCQDTQYF
clone_1602_aK0	clonotype688aKO	1	TRB:CASSDGGRDAETLYF
clone_1603_aK0	clonotype689aKO	1	TRB:CASSDVGGVGAEQFF
clone_1604_aK0	clonotype690aKO	1	TRB:CASSDVGASSYEQYF
clone_1605_aK0	clonotype691aKO	1	TRB:CASSAGTGNNQAPLF
clone_1606_aK0	clonotype692aKO	1	TRB:CASSQQTNSDYTF
clone_1607_aK0	clonotype694aKO	1	TRB:CASSYRGNSPLYF
clone_1608_aK0	clonotype695aKO	1	TRB:CASSYGGGNTLYF
clone_1609_aK0	clonotype697aKO	1	TRB:CASSYWGAETLYF
clone_1610_aK0	clonotype698aKO	1	TRB:CASSWDCSYEQYF
clone_1611_aK0	clonotype699aKO	1	TRB:CASSWDCSYEQYF
clone_1612_aK0	clonotype700aKO	1	TRB:CASSLTGGYEQYF
clone_1613_aK0	clonotype701aKO	1	TRB:CASSLTGGREQYF
clone_1614_aK0	clonotype702aKO	1	TRB:CASSFDWGYEQYF
clone_1615_aK0	clonotype703aKO	1	TRB:CASRDRRGNTLYF
clone_1616_aK0	clonotype704aKO	1	TRB:CSSSQSGTEVFF
clone_1617_aK0	clonotype705aKO	1	TRB:CTCSARGEQYF
clone_1618_aK0	clonotype706aKO	1	TRB:CTCSVGDTQYF
clone_1619_aK0	clonotype707aKO	1	TRB:CASSQENNQDTQYF;TRA:CAASNYGNEKITF;TRA:CILRGGNNKLTF
clone_1620_aK0	clonotype708aKO	1	TRB:CASSQETTNSDYTF;TRA:CAQSGTYQRF
clone_1621_aK0	clonotype709aKO	1	TRB:CASSDSGLGYEQYF;TRA:CARDGNEKITF
clone_1622_aK0	clonotype710aKO	1	TRB:CGARGQGGSAETLYF;TRA:CILSSNTNKVVF
clone_1623_aK0	clonotype711aKO	1	TRB:CASSLLGGEQYF;TRA:CATSNNNNAPRF;TRA:CAYQGGRALIF
clone_1624_aK0	clonotype712aKO	1	TRB:CASSQGGGAAEQFF;TRA:CAAGSNTNKVVF;TRA:CAMREANYGNEKITF
clone_1625_aK0	clonotype713aKO	1	TRB:CASSYWGGANEQYF;TRB:CAWSPDWGNYAEQFF;TRA:CAERGTQVVGQLTF;TRA:CAMGNSGTYQRF
clone_1626_aK0	clonotype714aKO	1	TRB:CASSSSAETLYF;TRA:CAIGSGYNKLTF
clone_1627_aK0	clonotype715aKO	1	TRB:CASRNGGNYAEQFF;TRA:CALDTGYQNFYF
clone_1628_aK0	clonotype716aKO	1	TRB:CASSDRAGGVNTQYF;TRA:CAAAYGNEKITF
clone_1629_aK0	clonotype717aKO	1	TRB:CASSPRQSYEQYF;TRA:CAIDTNTGKLTF
clone_1630_aK0	clonotype718aKO	1	TRB:CASSSQKNTEVFF;TRA:CARGAYKVIF
clone_1631_aK0	clonotype719aKO	1	TRB:CASVGGPGTGQLYF;TRA:CAAASSGSWQLIF
clone_1632_aK0	clonotype720aKO	1	TRB:CAWSPGQGIAETLYF;TRA:CAAEYSGSWQLIF
clone_1633_aK0	clonotype721aKO	1	TRB:CASSFTGREQYF;TRA:CAFLNNAGAKLTF
clone_1634_aK0	clonotype722aKO	1	TRB:CASSGQGGSAETLYF;TRA:CALRDMGYKLTF;TRA:CAVSGGYKVVF
clone_1635_aK0	clonotype724aKO	1	TRB:CASSQASSGNTLYF;TRB:CASSQTSSQNTLYF;TRA:CAAEGSSGSWQLIF
clone_1636_aK0	clonotype725aKO	1	TRB:CASSQGGYTGQLYF;TRA:CAMNYGSSGNKLIF
clone_1637_aK0	clonotype726aKO	1	TRB:CAWSLAQGANTEVFF;TRA:CAANNAGAKLTF
clone_1638_aK0	clonotype727aKO	1	TRB:CASSLGGDTQYF;TRA:CAVSNYANKMIF
clone_1639_aK0	clonotype728aKO	1	TRB:CASRTGSSDYTF;TRA:CATSGGNYKPTF
clone_1640_aK0	clonotype729aKO	1	TRB:CASTGGRTGNTLYF;TRA:CALSKGGSALGRLHF;TRA:CAPGTGGYKVVF
clone_1641_aK0	clonotype730aKO	1	TRB:CASSPDNSGNTLYF;TRA:CAMERVYGNEKITF
clone_1642_aK0	clonotype731aKO	1	TRB:CASSEQDRDTEVFF;TRA:CAVSSNTNKVVF
clone_1643_aK0	clonotype732aKO	1	TRB:CASSEGGGAGTQYF;TRA:CAASSNAYKVIF
clone_1644_aK0	clonotype733aKO	1	TRB:CASSERDSSYEQYF;TRA:CAAEFMSNYNVLYF
clone_1645_aK0	clonotype734aKO	1	TRB:CASSDAGASAETLYF;TRA:CATDETGFASALTF
clone_1646_aK0	clonotype735aKO	1	TRB:CASSGGLGSSYEQYF;TRA:CAARWNYAQGLTF;TRA:CATGTGGYKVVF
clone_1647_aK0	clonotype736aKO	1	TRB:CASSQELDTEVFF;TRA:CALELNTNTGKLTF
clone_1648_aK0	clonotype737aKO	1	TRB:CASSQGPNTEVFF;TRA:CALNTGYQNFYF
clone_1649_aK0	clonotype738aKO	1	TRB:CASSHGNTGQLYF;TRA:CALSDSNTNKVVF
clone_1650_aK0	clonotype739aKO	1	TRB:CASSQDWGDYEQYF;TRA:CAVRDHNYNQGKLIF
clone_1651_aK0	clonotype740aKO	1	TRB:CAWSLRTGLSYEQYF;TRA:CAVRDRGSALGRLHF
clone_1652_aK0	clonotype741aKO	1	TRB:CASSRDRVEQYF;TRA:CAANDSGYNKLTF
clone_1653_aK0	clonotype742aKO	1	TRB:CASSSDRQAPLF;TRA:CAARGSNYNVLYF
clone_1654_aK0	clonotype743aKO	1	TRB:CASSLDLQEVFF;TRA:CAVRSGTYQRF
clone_1655_aK0	clonotype744aKO	1	TRB:CASSQGDTEVFF;TRA:CAASRGGNYKYVF
clone_1656_aK0	clonotype745aKO	1	TRB:CASSPGPDTGQLYF;TRA:CALSETNTGKLTF
clone_1657_aK0	clonotype746aKO	1	TRB:CASRDISYNSPLYF;TRA:CAVSGGSNYKLTF
clone_1658_aK0	clonotype748aKO	1	TRB:CASSLKANSDYTF;TRB:CASSSHSQNTLYF;TRA:CATDAGGNYKPTF
clone_1659_aK0	clonotype749aKO	1	TRB:CGARDHTASAETLYF;TRA:CVLVDNYAQGLTF
clone_1660_aK0	clonotype750aKO	1	TRB:CGARVPGRANTEVFF;TRA:CAARNNAGAKLTF
clone_1661_aK0	clonotype751aKO	1	TRB:CASSQDVGNSDYTF;TRA:CAVSIGNYAQGLTF
clone_1662_aK0	clonotype754aKO	1	TRB:CASSINQDTQYF;TRB:CAWSLEGQAGNTLYF;TRA:CAVSMRNSNNRIFF
clone_1663_aK0	clonotype755aKO	1	TRB:CASSPSSYEQYF;TRA:CALISNTNKVVF
clone_1664_aK0	clonotype756aKO	1	TRB:CASSAWGVEQYF;TRB:CASSPLQGANTGQLYF;TRA:CAVRTTGNTGKLIF
clone_1665_aK0	clonotype757aKO	1	TRB:CASSSSQNTLYF;TRA:CAVRLSGSFNKLTF
clone_1666_aK0	clonotype758aKO	1	TRB:CASSRTGSTEVFF;TRA:CALDLIASSSFSKLVF
clone_1667_aK0	clonotype759aKO	1	TRB:CASSWGGYEQYF;TRA:CAVRSSGSWQLIF
clone_1668_aK0	clonotype760aKO	1	TRB:CASRDSSYEQYF;TRA:CALSETASLGKLQF
clone_1669_aK0	clonotype761aKO	1	TRB:CASSLTDSGNTLYF;TRA:CALGNSNNRIFF
clone_1670_aK0	clonotype762aKO	1	TRB:CASSRQGVNERLFF;TRA:CAVTSTSSGQKLVF
clone_1671_aK0	clonotype763aKO	1	TRB:CASSEADSGNTLYF;TRA:CAVRTSGGNYKPTF
clone_1672_aK0	clonotype764aKO	1	TRB:CASSADRGQDTQYF;TRA:CAVSARQGGRALIF
clone_1673_aK0	clonotype765aKO	1	TRB:CASGGQGFGNTLYF;TRA:CAAPASSGSWQLIF
clone_1674_aK0	clonotype766aKO	1	TRB:CATGTGGAGNTLYF;TRA:CALGASNTNKVVF
clone_1675_aK0	clonotype767aKO	1	TRB:CASSDGGRNSYEQYF;TRA:CAVSAITNTGKLTF
clone_1676_aK0	clonotype768aKO	1	TRB:CASSSGANSDYTF;TRA:CALSMYNVLYF
clone_1677_aK0	clonotype769aKO	1	TRB:CASSLGGRAEQFF;TRA:CAVVITGNTGKLIF
clone_1678_aK0	clonotype770aKO	1	TRB:CASADWGYAEQFF;TRA:CAMSPNYNQGKLIF
clone_1679_aK0	clonotype771aKO	1	TRB:CSSSQGTTEVFF;TRA:CAARLNYNQGKLIF
clone_1680_aK0	clonotype772aKO	1	TRB:CASSGGLGTNTGQLYF;TRB:CTCSDRDEQYF;TRA:CALSITGGYKVVF
clone_1681_aK0	clonotype774aKO	1	TRB:CAWSFDGTSNTEVFF;TRA:CASYGSSGNKLIF
clone_1682_aK0	clonotype775aKO	1	TRB:CASSPENTEVFF;TRA:CAAGAEGADRLTF
clone_1683_aK0	clonotype776aKO	1	TRB:CASNAGQNTEVFF;TRA:CVLRSTSSGQKLVF
clone_1684_aK0	clonotype777aKO	1	TRB:CASSLETGQLYF;TRA:CATDAGDTNTGKLTF
clone_1685_aK0	clonotype778aKO	1	TRB:CASSEFGTKDTQYF;TRA:CAVSRSNYNVLYF
clone_1686_aK0	clonotype779aKO	1	TRB:CASREGGANTEVFF;TRB:CASSYRVANSDYTF;TRA:CAVSGTGGYKVVF
clone_1687_aK0	clonotype780aKO	1	TRB:CASGDAADNERLFF;TRA:CAVRANYGNEKITF
clone_1688_aK0	clonotype781aKO	1	TRB:CASSASRTGVYEQYF;TRA:CAASKGTGNTGKLIF
clone_1689_aK0	clonotype782aKO	1	TRB:CASSGAGTGDAEQFF;TRA:CAAVRNNNNAPRF;TRA:CALGDQGKVVF
clone_1690_aK0	clonotype783aKO	1	TRB:CASRLGFQDTQYF;TRA:CALSQTGNTGKLIF
clone_1691_aK0	clonotype784aKO	1	TRB:CASSWGANTEVFF;TRA:CALRSNSAGNKLTF
clone_1692_aK0	clonotype785aKO	1	TRB:CASSQEGHQDTQYF;TRA:CAVSAGGDYANKMIF
clone_1693_aK0	clonotype786aKO	1	TRB:CASSQSTGQNTLYF;TRA:CALVGTGGYKVVF
clone_1694_aK0	clonotype787aKO	1	TRB:CASSLGDWVYEQYF;TRA:CAASPRNYAQGLTF
clone_1695_aK0	clonotype788aKO	1	TRB:CAWRTGGVNTGQLYF;TRA:CAASSTSSGQKLVF
clone_1696_aK0	clonotype789aKO	1	TRB:CAWSPQNSYNSPLYF;TRA:CALVGAGGYKVVF
clone_1697_aK0	clonotype790aKO	1	TRB:CASSLEGREQYF;TRA:CALNVGDNSKLIW
clone_1698_aK0	clonotype792aKO	1	TRB:CASSLGQQAPLF;TRA:CAVSQTGFASALTF
clone_1699_aK0	clonotype793aKO	1	TRB:CASNWGDLYAEQFF;TRA:CALSELGAQGLTF
clone_1700_aK0	clonotype794aKO	1	TRB:CASGDRGGQNTLYF;TRB:CASSIGGATYEQYF;TRA:CAFPRYGNEKITF
clone_1701_aK0	clonotype795aKO	1	TRB:CASSDVGQGVDEQYF;TRA:CALTGTGGYKVVF
clone_1702_aK0	clonotype796aKO	1	TRB:CASSQTGDYEQYF;TRA:CAASTGANTGKLTF
clone_1703_aK0	clonotype797aKO	1	TRB:CASSQEREGEQYF;TRA:CAASRTGSFNKLTF
clone_1704_aK0	clonotype798aKO	1	TRB:CASSLLVGSDYTF;TRA:CAVSARAQVVGQLTF
clone_1705_aK0	clonotype799aKO	1	TRB:CASSQGGRRAEQFF;TRA:CALSENNMGYKLTF
clone_1706_aK0	clonotype801aKO	1	TRB:CASSPQNERLFF;TRA:CALSLLTGNTGKLIF
clone_1707_aK0	clonotype802aKO	1	TRB:CASSLERNTLYF;TRA:CAASGATGGNNKLTF
clone_1708_aK0	clonotype803aKO	1	TRB:CASSFEGTEVFF;TRA:CALGRNMGYKLTF
clone_1709_aK0	clonotype804aKO	1	TRB:CASSETGNTGQLYF;TRA:CVLRANTGANTGKLTF
clone_1710_aK0	clonotype805aKO	1	TRB:CASSDAWGHYEQYF;TRA:CALSEDTNTGKLTF
clone_1711_aK0	clonotype806aKO	1	TRB:CGASGLGGRYAEQFF;TRA:CAVSVWGSALGRLHF
clone_1712_aK0	clonotype807aKO	1	TRB:CASSAGGPSDYTF;TRA:CAMREDTEGADRLTF
clone_1713_aK0	clonotype808aKO	1	TRB:CASSYGTGYEQYF;TRA:CALGPSNMGYKLTF
clone_1714_aK0	clonotype809aKO	1	TRB:CASSPLGGREQYF;TRB:CGAPDWGGDQDTQYF;TRA:CAASADYGSSGNKLIF
clone_1715_aK0	clonotype80aKO	1	TRB:CTCSADWGVSAETLYF;TRA:CAALGGYKVVF;TRA:CAASEGNYAQGLTF
clone_1716_aK0	clonotype810aKO	1	TRB:CASSQEGSQNTLYF;TRA:CAMREGITGNTGKLIF
clone_1717_aK0	clonotype811aKO	1	TRB:CASSRDWGYAEQFF;TRA:CALGDPPASLGKLQF
clone_1718_aK0	clonotype812aKO	1	TRB:CASSDRQGAETLYF;TRA:CAASSNYQLIW
clone_1719_aK0	clonotype813aKO	1	TRB:CASHSASSAETLYF;TRA:CAMREDHYGNEKITF
clone_1720_aK0	clonotype814aKO	1	TRB:CANRDREDTEVFF;TRB:CTCSADLGGRNTGQLYF;TRA:CAMRDASSGSWQLIF
clone_1721_aK0	clonotype816aKO	1	TRB:CASSQDNNQDTQYF;TRA:CAASYSNNRLTL
clone_1722_aK0	clonotype817aKO	1	TRB:CASSQGASSYEQYF;TRA:CAARTGSGGKLTL
clone_1723_aK0	clonotype818aKO	1	TRB:CASSDRKDTQYF;TRA:CALSGHMNTGGLSGKLTF
clone_1724_aK0	clonotype819aKO	1	TRB:CASSQQGTSDYTF;TRA:CAASDYSNNRLTL
clone_1725_aK0	clonotype820aKO	1	TRB:CASSSDSAETLYF;TRA:CAAMSNYNVLYF
clone_1726_aK0	clonotype821aKO	1	TRB:CASSQVLGGNQDTQYF;TRB:CAWSRLQVSNERLFF;TRA:CAASDYSNNRLTL
clone_1727_aK0	clonotype822aKO	1	TRB:CAWSLVGASAETLYF;TRA:CAAKATGNTGKLIF
clone_1728_aK0	clonotype823aKO	1	TRB:CASSFDKYEQYF;TRA:CAAGAKAGGSAKLIF
clone_1729_aK0	clonotype825aKO	1	TRB:CASSLGGGEQYF;TRA:CAASAKGTGSKLSF
clone_1730_aK0	clonotype826aKO	1	TRB:CASSLGGAEQFF;TRA:CAAGESSGGSNYKLTF
clone_1731_aK0	clonotype827aKO	1	TRB:CASSYGGHEQYF;TRA:CAASRGSALGRLHF
clone_1732_aK0	clonotype828aKO	1	TRB:CASSDWDNNQAPLF;TRA:CAASATASLGKLQF
clone_1733_aK0	clonotype829aKO	1	TRB:CASSPRGDSDYTF;TRA:CAASASSGSWQLIF
clone_1734_aK0	clonotype830aKO	1	TRB:CASSQDRSNTEVFF;TRA:CAASDIASSSFSKLVF
clone_1735_aK0	clonotype831aKO	1	TRB:CASSQQGAGNTLYF;TRA:CALSELMNYNQGKLIF
clone_1736_aK0	clonotype832aKO	1	TRB:CASSPQGSAETLYF;TRA:CALSELTGDYANKMIF
clone_1737_aK0	clonotype834aKO	1	TRB:CASSFRNYEQYF;TRA:CALSPDTNAYKVIF
clone_1738_aK0	clonotype835aKO	1	TRA:CAASRGYGNEKITF
clone_1739_aK0	clonotype836aKO	1	TRA:CAARSMSNYNVLYF
clone_1740_aK0	clonotype837aKO	1	TRA:CAQTQVVGQLTF
clone_1741_aK0	clonotype838aKO	1	TRB:CASSPGQGNAEQFF
clone_1742_aK0	clonotype839aKO	1	TRB:CASSLQGLNAEQFF
clone_1743_aK0	clonotype840aKO	1	TRB:CASSSQGFGNTLYF
clone_1744_aK0	clonotype841aKO	1	TRB:CASSLTGGYAEQFF
clone_1745_aK0	clonotype842aKO	1	TRB:CASSLETTNTEVFF
clone_1746_aK0	clonotype843aKO	1	TRB:CASSLGDIQDTQYF
clone_1747_aK0	clonotype844aKO	1	TRB:CASSLSLANTEVFF
clone_1748_aK0	clonotype845aKO	1	TRB:CASSFTPSQNTLYF
clone_1749_aK0	clonotype846aKO	1	TRB:CASSFGQNYAEQFF
clone_1750_aK0	clonotype847aKO	1	TRB:CASSFGQNYAEQFF
clone_1751_aK0	clonotype848aKO	1	TRB:CASSQELGSAETLYF
clone_1752_aK0	clonotype850aKO	1	TRB:CASSQELGSAETLYF
clone_1753_aK0	clonotype851aKO	1	TRB:CASSQEGQGGERLFF
clone_1754_aK0	clonotype852aKO	1	TRB:CASSQDSISNERLFF
clone_1755_aK0	clonotype853aKO	1	TRB:CASSQDHRGYAEQFF
clone_1756_aK0	clonotype854aKO	1	TRB:CASSQEGQGNERLFF
clone_1757_aK0	clonotype855aKO	1	TRB:CASSQEGRGAETLYF
clone_1758_aK0	clonotype856aKO	1	TRB:CASSQEGGDAETLYF
clone_1759_aK0	clonotype857aKO	1	TRB:CASSQDYANTGQLYF
clone_1760_aK0	clonotype858aKO	1	TRB:CASSQDYANTGQLYF
clone_1761_aK0	clonotype859aKO	1	TRB:CASSQGTGGSYEQYF
clone_1762_aK0	clonotype860aKO	1	TRB:CASSQVTGYTGQLYF
clone_1763_aK0	clonotype861aKO	1	TRB:CASSQTGNSGNTLYF
clone_1764_aK0	clonotype862aKO	1	TRB:CASSQGLGAYAEQFF
clone_1765_aK0	clonotype863aKO	1	TRB:CASSPGQVANSDYTF
clone_1766_aK0	clonotype864aKO	1	TRB:CASSPGQVANSDYTF
clone_1767_aK0	clonotype865aKO	1	TRB:CASSRQGNSGNTLYF
clone_1768_aK0	clonotype866aKO	1	TRA:CALNTGGLSGKLTF
clone_1769_aK0	clonotype867aKO	1	TRA:CAVRASSGSWQLIF
clone_1770_aK0	clonotype868aKO	1	TRB:CAWSLMGLGTYAEQFF
clone_1771_aK0	clonotype869aKO	1	TRB:CAWSLMGLGTYAEQFF
clone_1772_aK0	clonotype870aKO	1	TRB:CAWSLLGLGAGAEQFF
clone_1773_aK0	clonotype871aKO	1	TRB:CASRDTPNTEVFF
clone_1774_aK0	clonotype872aKO	1	TRB:CASSQQANTEVFF
clone_1775_aK0	clonotype873aKO	1	TRB:CASSRDNNERLFF
clone_1776_aK0	clonotype874aKO	1	TRB:CASSRDIYAEQFF
clone_1777_aK0	clonotype875aKO	1	TRB:CASSSGDNSPLYF
clone_1778_aK0	clonotype876aKO	1	TRB:CASSSWGDAEQFF
clone_1779_aK0	clonotype877aKO	1	TRB:CASSSSSAETLYF
clone_1780_aK0	clonotype878aKO	1	TRB:CASSWDNNQAPLF
clone_1781_aK0	clonotype879aKO	1	TRB:CASSWGSGNTLYF
clone_1782_aK0	clonotype880aKO	1	TRB:CASSWGSGNTLYF
clone_1783_aK0	clonotype881aKO	1	TRB:CASSLNSFYEQYF
clone_1784_aK0	clonotype882aKO	1	TRB:CASSLKANQAPLF
clone_1785_aK0	clonotype883aKO	1	TRB:CASSLEGNTEVFF
clone_1786_aK0	clonotype884aKO	1	TRB:CASSLEGGYEQYF
clone_1787_aK0	clonotype885aKO	1	TRB:CASSLAGTSTQYF
clone_1788_aK0	clonotype886aKO	1	TRB:CASSLGVNSDYTF
clone_1789_aK0	clonotype888aKO	1	TRB:CASSKLGSQNTLYF
clone_1790_aK0	clonotype889aKO	1	TRB:CASSRDPGKDTQYF
clone_1791_aK0	clonotype890aKO	1	TRB:CASSSHKNTGQLYF
clone_1792_aK0	clonotype891aKO	1	TRB:CASSSAGARDTQYF
clone_1793_aK0	clonotype892aKO	1	TRB:CASSPRDTSYEQYF
clone_1794_aK0	clonotype893aKO	1	TRB:CASSPWGGYEQYF
clone_1795_aK0	clonotype894aKO	1	TRB:CASSWDTYAEQFF
clone_1796_aK0	clonotype895aKO	1	TRB:CASSWDTYAEQFF
clone_1797_aK0	clonotype897aKO	1	TRB:CASSLEGVGEQYF
clone_1798_aK0	clonotype898aKO	1	TRB:CASSLDHIYEQYF
clone_1799_aK0	clonotype899aKO	1	TRB:CASSLGGSYEQYF
clone_1800_aK0	clonotype900aKO	1	TRB:CASSFSTNTEVFF
clone_1801_aK0	clonotype901aKO	1	TRB:CASSLTGGYEQYF
clone_1802_aK0	clonotype902aKO	1	TRB:CASSLGGTYEQYF
clone_1803_aK0	clonotype903aKO	1	TRB:CASSLGWYAEQFF
clone_1804_aK0	clonotype904aKO	1	TRB:CASSLSQGGEVFF
clone_1805_aK0	clonotype905aKO	1	TRB:CASSLSTRSDYTF
clone_1806_aK0	clonotype906aKO	1	TRB:CASSPHAEDTQYF
clone_1807_aK0	clonotype907aKO	1	TRB:CASSRDNQDTQYF
clone_1808_aK0	clonotype908aKO	1	TRB:CASSSGTVYEQYF
clone_1809_aK0	clonotype909aKO	1	TRB:CASSSTLNERLFF
clone_1810_aK0	clonotype90aKO	1	TRB:CASSQDLGGRGQNTLYF;TRB:CTCSAGFYEQYF;TRA:CALRGDTNAYKVIF
clone_1811_aK0	clonotype910aKO	1	TRB:CASSSTLNERLFF
clone_1812_aK0	clonotype911aKO	1	TRB:CASSFGGRAEVFF
clone_1813_aK0	clonotype912aKO	1	TRB:CASSLSLQDTQYF
clone_1814_aK0	clonotype913aKO	1	TRB:CASTHSNYAEQFF
clone_1815_aK0	clonotype914aKO	1	TRB:CASTGQGDTEVFF
clone_1816_aK0	clonotype915aKO	1	TRB:CASTGQGDTEVFF
clone_1817_aK0	clonotype916aKO	1	TRB:CASTGQGDTEVFF
clone_1818_aK0	clonotype917aKO	1	TRB:CASRPGGAYEQYF
clone_1819_aK0	clonotype918aKO	1	TRB:CASSRDWGGEQYF
clone_1820_aK0	clonotype919aKO	1	TRB:CASRDRNQDTQYF
clone_1821_aK0	clonotype920aKO	1	TRB:CASSQQNYAEQFF
clone_1822_aK0	clonotype921aKO	1	TRB:CASSGTGGYEQYF
clone_1823_aK0	clonotype922aKO	1	TRB:CASSSDSYAEQFF
clone_1824_aK0	clonotype923aKO	1	TRB:CASSSGTKDTQYF
clone_1825_aK0	clonotype924aKO	1	TRB:CASSSGTKDTQYF
clone_1826_aK0	clonotype925aKO	1	TRB:CASSSGTKDTQYF
clone_1827_aK0	clonotype926aKO	1	TRB:CASSLGTGDEQYF
clone_1828_aK0	clonotype927aKO	1	TRB:CASSFGGGSDYTF
clone_1829_aK0	clonotype929aKO	1	TRB:CASSFGHPYEQYF
clone_1830_aK0	clonotype930aKO	1	TRB:CASRLGYYAEQFF
clone_1831_aK0	clonotype931aKO	1	TRB:CASSWSGRGQNTLYF
clone_1832_aK0	clonotype932aKO	1	TRB:CASSEGGRAIAEQFF
clone_1833_aK0	clonotype933aKO	1	TRB:CASSDRDGGQDTQYF
clone_1834_aK0	clonotype934aKO	1	TRB:CASSDDWGVLYEQYF
clone_1835_aK0	clonotype935aKO	1	TRB:CASSDAQGANERLFF
clone_1836_aK0	clonotype937aKO	1	TRB:CASSDAGASNSDYTF
clone_1837_aK0	clonotype938aKO	1	TRB:CASSDARLSAETLYF
clone_1838_aK0	clonotype939aKO	1	TRB:CASSAPGLGVDTQYF
clone_1839_aK0	clonotype940aKO	1	TRB:CASSAPGLGVDTQYF
clone_1840_aK0	clonotype941aKO	1	TRB:CASSGTTANTGQLYF
clone_1841_aK0	clonotype942aKO	1	TRB:CASSVPGQGTETLYF
clone_1842_aK0	clonotype943aKO	1	TRB:CASSSGTGVSYEQYF
clone_1843_aK0	clonotype944aKO	1	TRB:CASSDSGTGGYEQYF
clone_1844_aK0	clonotype945aKO	1	TRB:CASGDTGGNYAEQFF
clone_1845_aK0	clonotype946aKO	1	TRB:CASGDQGSSQNTLYF
clone_1846_aK0	clonotype947aKO	1	TRB:CASGESDRGNSDYTF
clone_1847_aK0	clonotype948aKO	1	TRB:CASGDAGNSGNTLYF
clone_1848_aK0	clonotype949aKO	1	TRB:CASGDGAGGRSDYTF
clone_1849_aK0	clonotype950aKO	1	TRB:CASGGPGQNNQAPLF
clone_1850_aK0	clonotype951aKO	1	TRB:CASSDAGGPSAETLYF
clone_1851_aK0	clonotype952aKO	1	TRB:CASSDGTGGTNERLFF
clone_1852_aK0	clonotype953aKO	1	TRB:CASSAAGQFSNERLFF
clone_1853_aK0	clonotype954aKO	1	TRB:CASSAAGQFSNERLFF
clone_1854_aK0	clonotype955aKO	1	TRB:CASSAAGQFSNERLFF
clone_1855_aK0	clonotype958aKO	1	TRB:CASSVPGQGRTGQLYF
clone_1856_aK0	clonotype959aKO	1	TRB:CASSQEPTRAEQFF
clone_1857_aK0	clonotype960aKO	1	TRB:CASSQVVDNYEQYF
clone_1858_aK0	clonotype961aKO	1	TRB:CASRLGASQNTLYF
clone_1859_aK0	clonotype962aKO	1	TRB:CASSKARNTGQLYF
clone_1860_aK0	clonotype963aKO	1	TRB:CASSHGTGQDTQYF
clone_1861_aK0	clonotype964aKO	1	TRB:CASSPGTGGTEVFF
clone_1862_aK0	clonotype965aKO	1	TRB:CASSPTNSQNTLYF
clone_1863_aK0	clonotype966aKO	1	TRB:CASSLRDRGDTQYF
clone_1864_aK0	clonotype967aKO	1	TRB:CASSYAGGNQAPLF
clone_1865_aK0	clonotype968aKO	1	TRB:CASSSPGRYAEQFF
clone_1866_aK0	clonotype969aKO	1	TRB:CASSSPGRYAEQFF
clone_1867_aK0	clonotype970aKO	1	TRB:CASSSGGRWNTLYF
clone_1868_aK0	clonotype971aKO	1	TRB:CASSWRVSNERLFF
clone_1869_aK0	clonotype972aKO	1	TRB:CASSFSGTGLEQYF
clone_1870_aK0	clonotype973aKO	1	TRB:CSSSQEADTEVFF
clone_1871_aK0	clonotype974aKO	1	TRB:CSSSQSAQQAPLF
clone_1872_aK0	clonotype976aKO	1	TRB:CTCSAKNTEVFF
clone_1873_aK0	clonotype977aKO	1	TRB:CTCSGSAETLYF
clone_1874_aK0	clonotype978aKO	1	TRB:CASSSGTGVSNERLFF;TRA:CATDYNQGKLIF
clone_1875_aK0	clonotype979aKO	1	TRB:CASSRDRGNSPLYF;TRA:CAADYANKMIF
clone_1876_aK0	clonotype980aKO	1	TRB:CTCSAERDTLYF;TRA:CAGDSGTYQRF
clone_1877_aK0	clonotype981aKO	1	TRB:CASSLEGAYEQYF;TRA:CAAGDSNNRIFF
clone_1878_aK0	clonotype982aKO	1	TRB:CASSFGANTEVFF;TRA:CAVTEGADRLTF
clone_1879_aK0	clonotype983aKO	1	TRB:CASSLTGGYEQYF;TRA:CAGTGKLIF
clone_1880_aK0	clonotype984aKO	1	TRB:CASSSGGDQDTQYF;TRA:CAEGSAGNKLTF
clone_1881_aK0	clonotype985aKO	1	TRB:CTCSAPEDTQYF;TRA:CAVENNNNAPRF
clone_1882_aK0	clonotype986aKO	1	TRB:CASSSDSYNSPLYF;TRA:CAMENYGNEKITF
clone_1883_aK0	clonotype987aKO	1	TRB:CASSLGNNNQAPLF;TRA:CAAYGGSNAKLTF
clone_1884_aK0	clonotype988aKO	1	TRB:CASSPGTTETLYF;TRA:CAAEGSNTNKVVF
clone_1885_aK0	clonotype989aKO	1	TRB:CASSLGPYQAPLF;TRA:CALEQGTGSKLSF
clone_1886_aK0	clonotype990aKO	1	TRB:CASSPNNYAEQFF;TRA:CALVQGTGSKLSF
clone_1887_aK0	clonotype991aKO	1	TRB:CASSLRGQNTLYF;TRA:CAMEVNSGTYQRF
clone_1888_aK0	clonotype992aKO	1	TRB:CASSLGGQNTLYF;TRA:CALGPSNTNKVVF
clone_1889_aK0	clonotype993aKO	1	TRB:CASSFTGGERLFF;TRA:CAASDNVGDNSKLIW;TRA:CAIESTNAYKVIF
clone_1890_aK0	clonotype994aKO	1	TRB:CASGDGAGGAETLYF;TRA:CAAEAGAGNKLTF
clone_1891_aK0	clonotype995aKO	1	TRB:CASSHTINQDTQYF;TRA:CAIVGTGSNRLTF
clone_1892_aK0	clonotype996aKO	1	TRB:CASSQGQTNTEVFF;TRA:CAAVNSAGNKLTF
clone_1893_aK0	clonotype997aKO	1	TRB:CASSGTGAGNTLYF;TRA:CAMAPSNMGYKLTF
clone_1894_aK0	clonotype998aKO	1	TRB:CASSQTGGSAETLYF;TRA:CAVRNSNNRIFF
	sum	3599
	count	1894

## Sheet: p-aKO1
clone	clonotype_id	H11	cdr3s_aa
clone_1_H11	clonotype1H11	694	TRB:CGARDINSYEQYF;TRA:CAVSMTNSGTYQRF
clone_2_H11	clonotype2H11	325	TRB:CASSVGAYAEQFF;TRA:CVLGPSNTNKVVF
clone_3_H11	clonotype3H11	161	TRB:CTCSADPGNYAEQFF;TRA:CALRNGGSNAKLTF
clone_4_H11	clonotype4H11	61	TRB:CASSLDGRGYEQYF;TRA:CAASARDTNAYKVIF
clone_5_H11	clonotype5H11	58	TRB:CARRQSSYEQYF;TRB:CASSAGGGLNERLFF;TRA:CAIDRGGYKLTF
clone_6_H11	clonotype7H11	49	TRB:CASSQDGRTGGGEQYF;TRA:CAGTGNTGKLIF
clone_7_H11	clonotype8H11	46	TRB:CASSQEGRTGNERLFF;TRA:CALTPNNNNAPRF;TRA:CAMRNTEGADRLTF
clone_8_H11	clonotype6H11	45	TRB:CASSLEGWGVNQDTQYF;TRA:CALWELRNTNTGKLTF;TRA:CAMREGPRAGGSNAKLTF;TRA:CAMREGPRAGGSNAKLTF
clone_9_H11	clonotype12H11	32	TRB:CGAREGANNERLFF;TRA:CAASASGSFNKLTF
clone_10_H11	clonotype13H11	30	TRB:CASSQEGRTGSTEVFF;TRA:CALERRTNAYKVIF;TRA:CAVSGNNNNAPRF
clone_11_H11	clonotype15H11	30	TRB:CASSQEVRNQDTQYF;TRA:CILRVANANKMIF
clone_12_H11	clonotype10H11	29	TRB:CASSQTGASAETLYF;TRA:CAAEAMSNYNVLYF
clone_13_H11	clonotype17H11	29	TRB:CASSQAGGYEQYF;TRA:CAVRNNAGAKLTF
clone_14_H11	clonotype9H11	29	TRB:CASSQTGASAETLYF;TRA:CAAEAFSNYNVLYF
clone_15_H11	clonotype16H11	25	TRB:CASSQDGRTGPETLYF;TRA:CALTRNNNNAPRF
clone_16_H11	clonotype11H11	24	TRB:CASSSGGRSAETLYF;TRA:CAAEALSNYNVLYF;TRA:CAMERNTGGLSGKLTF
clone_17_H11	clonotype14H11	24	TRB:CASSPGQTEVFF;TRA:CAMRENGGSGGKLTL;TRA:CAVTLDYANKMIF
clone_18_H11	clonotype21H11	24	TRB:CASSKQGARDQNTLYF;TRB:CASSPLGLQDTQYF;TRA:CAMREGGYSNNRLTL
clone_19_H11	clonotype23H11	22	TRB:CASSPRDLDTQYF;TRA:CAASATGGNNKLTF
clone_20_H11	clonotype26H11	21	TRB:CASSSSGTSAETLYF;TRA:CAAEAMSNYNVLYF
clone_21_H11	clonotype24H11	20	TRB:CASSIEWDQDTQYF;TRA:CAARGGPSSGSWQLIF;TRA:CAASGSSGSWQLIF
clone_22_H11	clonotype18H11	19	TRB:CASSKTGRSAETLYF;TRA:CAAEAMSNYNVLYF
clone_23_H11	clonotype25H11	19	TRB:CASSPLGLQDTQYF
clone_24_H11	clonotype20H11	18	TRB:CASSKTGGVAETLYF;TRA:CAAEEMSNYNVLYF
clone_25_H11	clonotype27H11	18	TRB:CTCSADLRIKSEVFF;TRA:CAATTSSGQKLVF;TRA:CALTFYGSSGNKLIF
clone_26_H11	clonotype31H11	18	TRB:CASGREGRNSPLYF;TRA:CAAERGSSGNKLIF
clone_27_H11	clonotype30H11	17	TRB:CASRRAGADTEVFF;TRA:CATDEDYSNNRLTL;TRA:CAVSAEGGRALIF
clone_28_H11	clonotype19H11	16	TRB:CASSLGRVSGNTLYF;TRA:CALVDPQGGRALIF
clone_29_H11	clonotype22H11	16	TRB:CASGDGNTQYF;TRA:CVRGSALGRLHF
clone_30_H11	clonotype28H11	15	TRB:CASSLDGGGEQYF;TRB:CASSLDGRGYEQYF;TRA:CALRDYTGGNNKLTF
clone_31_H11	clonotype34H11	15	TRB:CASSQEGRTGNERLFF;TRA:CAASRNNNNAPRF;TRA:CAVKTTEGADRLTF
clone_32_H11	clonotype33H11	14	TRB:CASSQEGQGTETLYF;TRA:CAASEGGTNTGKLTF
clone_33_H11	clonotype32H11	13	TRB:CASGDAQSNTEVFF;TRA:CALGNSGTYQRF;TRA:CAVRDGTNTGKLTF
clone_34_H11	clonotype36H11	12	TRB:CASGDLTDTEVFF;TRA:CAANSNNRIFF
clone_35_H11	clonotype37H11	12	TRB:CASSDAAERLFF;TRA:CAVMATGGNNKLTF;TRA:CAVSTTGANTGKLTF
clone_36_H11	clonotype29H11	11	TRB:CASSVGAYAEQFF;TRA:CALGDLGSNNRIFF
clone_37_H11	clonotype40H11	11	TRB:CASSIPGQGAETLYF;TRA:CAAERMSNYNVLYF
clone_38_H11	clonotype44H11	11	TRB:CASSQETSSAETLYF;TRA:CAASEGGSSGNKLIF
clone_39_H11	clonotype38H11	10	TRB:CASSQEGQNTGQLYF;TRA:CAMRGITGNTGKLIF
clone_40_H11	clonotype39H11	10	TRB:CASSQEGWGDEQYF;TRA:CAASEVGDNSKLIW
clone_41_H11	clonotype47H11	10	TRB:CASGDASGGKTLYF;TRA:CALGGPSTNTGKLTF;TRA:CAMERNAGAKLTF
clone_42_H11	clonotype35H11	9	TRB:CASSYGQVVSNERLFF;TRA:CALLRFGDNSKLIW
clone_43_H11	clonotype48H11	9	TRB:CASGREGRNSPLYF;TRA:CAAERGSSGNKLIF
clone_44_H11	clonotype49H11	9	TRB:CASGDDWASSYEQYF;TRA:CAASDGTGNTGKLIF
clone_45_H11	clonotype50H11	9	TRB:CASSFGGHSAETLYF;TRB:CGARGTGPSDYTF;TRA:CAAERMSNYNVLYF
clone_46_H11	clonotype52H11	9	TRB:CASSLDTGDEQYF;TRA:CAASDTNAYKVIF;TRA:CALSETNSAGNKLTF
clone_47_H11	clonotype54H11	9	TRB:CASSQEGRTGDERLFF;TRA:CALGERNNNAPRF
clone_48_H11	clonotype41H11	8	TRB:CASSSGLGGTYEQYF;TRA:CAARVMGYKLTF
clone_49_H11	clonotype42H11	8	TRB:CASSAGQGEQYF;TRA:CAASSGFASALTF
clone_50_H11	clonotype43H11	8	TRB:CASSHRASYEQYF;TRA:CAMEAGSFNKLTF
clone_51_H11	clonotype51H11	8	TRB:CASSDLTGVQDTQYF;TRA:CALGASSSFSKLVF
clone_52_H11	clonotype56H11	8	TRB:CTCSADGGLYAEQFF;TRA:CALRTGGSNAKLTF
clone_53_H11	clonotype59H11	8	TRB:CASSQAQTNTEVFF;TRA:CSANSAGNKLTF
clone_54_H11	clonotype60H11	8	TRB:CASSGQGEDTQYF;TRB:CASSLGRAEQFF;TRB:CASSQTGGVAETLYF;TRB:CTCSGQGNSDYTF;TRA:CAIALNTGNYKYVF
clone_55_H11	clonotype63H11	8	TRB:CASSQEGTGITGQLYF;TRA:CALGDPGNTGKLIF
clone_56_H11	clonotype45H11	7	TRB:CSSSPGTTNSDYTF;TRA:CAVRGGTGNTGKLIF
clone_57_H11	clonotype46H11	7	TRA:CALRDYTGGNNKLTF
clone_58_H11	clonotype53H11	7	TRB:CASSLGQGAETLYF;TRA:CALKTQVVGQLTF
clone_59_H11	clonotype55H11	7	TRB:CASSKQGARDQNTLYF;TRB:CASSPLGLQDTQYF;TRA:CAMREGGYSNNRLTL
clone_60_H11	clonotype61H11	7	TRB:CASSQTGGQDTQYF;TRB:CASTGQGSNERLFF;TRA:CALSDDSNNRIFF
clone_61_H11	clonotype64H11	7	TRB:CASSLEGGLSEQYF;TRA:CALGEGGSNAKLTF;TRA:CVLAPNNNAGAKLTF
clone_62_H11	clonotype66H11	7	TRB:CASSMGGTEVFF;TRA:CAAGETEGADRLTF;TRA:CAVRNTGYQNFYF
clone_63_H11	clonotype62H11	6	TRB:CASSDQGANYAEQFF;TRA:CAVGTGGYKVVF
clone_64_H11	clonotype67H11	6	TRB:CASSLAGGNEQYF;TRA:CALSVFTGGNNKLTF
clone_65_H11	clonotype68H11	6	TRB:CASSWTGANTGQLYF;TRA:CAVSRNSNNRIFF
clone_66_H11	clonotype69H11	6	TRB:CASSRGTGGYEQYF
clone_67_H11	clonotype70H11	6	TRB:CASSQDGRNSGNTLYF;TRA:CALSPGYNKLTF;TRA:CALWERISGTYQRF
clone_68_H11	clonotype72H11	6	TRB:CASSGEGAAPLYF;TRA:CASQTGNTGKLIF
clone_69_H11	clonotype74H11	6	TRB:CASSPNTEVFF;TRA:CAAEDNYAQGLTF
clone_70_H11	clonotype76H11	6	TRB:CASSFTENYAEQFF;TRA:CAMNNYAQGLTF
clone_71_H11	clonotype79H11	6	TRB:CASSLTGVSAETLYF;TRA:CVPGAGNTGKLIF
clone_72_H11	clonotype83H11	6	TRB:CASSSSPRDRNTGQLYF;TRA:CAAPSYSNNRIFF
clone_73_H11	clonotype100H11	5	TRB:CASSIVGADTGQLYF;TRA:CAVKDSNYQLIW
clone_74_H11	clonotype101H11	5	TRB:CASAGNSDYTF;TRB:CASGGDWGGAEQFF;TRA:CILRVARENTGYQNFYF
clone_75_H11	clonotype75H11	5	TRB:CASSQDWGGYEQYF;TRA:CAASEANTGKLTF
clone_76_H11	clonotype77H11	5	TRB:CASSLGGSSAETLYF;TRB:CTCSAVPGLGASQNTLYF;TRA:CAAERMSNYNVLYF;TRA:CVVGATSSGQKLVF
clone_77_H11	clonotype82H11	5	TRB:CASSQAGQGAGTEVFF;TRA:CALSGGGLSGKLTF
clone_78_H11	clonotype84H11	5	TRB:CASGDAAANSDYTF;TRB:CASSERDRGGEQYF;TRA:CALEHNAGAKLTF
clone_79_H11	clonotype86H11	5	TRB:CASGEARGYNSPLYF;TRA:CALSLTSGGNYKPTF
clone_80_H11	clonotype87H11	5	TRB:CASSGRDNTEVFF;TRB:CASSLEDRGRNTEVFF;TRA:CALERNAGAKLTF
clone_81_H11	clonotype89H11	5	TRB:CASSQDNNQDTQYF;TRA:CALSDRGYKVVF
clone_82_H11	clonotype94H11	5	TRB:CASSTVLSAETLYF;TRA:CAALINTGNYKYVF;TRA:CSASISNYQLIW
clone_83_H11	clonotype95H11	5	TRB:CASSQDLGGRGQNTLYF;TRA:CATGGNNKLTF
clone_84_H11	clonotype96H11	5	TRB:CTCSAAGHNQAPLF;TRA:CAAPSGGSNAKLTF
clone_85_H11	clonotype97H11	5	TRB:CASSLGEDTEVFF;TRA:CAANVGDNSKLIW
clone_86_H11	clonotype105H11	4	TRB:CASGREGRNSPLYF;TRA:CAAERGSSGNKLIF
clone_87_H11	clonotype106H11	4	TRB:CASSQEQGNERLFF;TRA:CALGVRNNNNAPRF;TRA:CAVSANAGSGGKLTL
clone_88_H11	clonotype112H11	4	TRB:CASRPPGQGAGDTGQLYF;TRB:CASRRLGGRDTQYF;TRA:CAASENQGGRALIF
clone_89_H11	clonotype113H11	4	TRB:CASSQEGRTGDERLFF;TRB:CASSRVSAETLYF;TRA:CAASASNNNAPRF
clone_90_H11	clonotype114H11	4	TRB:CASSRDWGIQNTLYF;TRA:CAMRNQGGSAKLIF
clone_91_H11	clonotype116H11	4	TRB:CASSADWGNYAEQFF;TRB:CASSLLDAEQFF;TRA:CVLSDSNYQLIW
clone_92_H11	clonotype65H11	4	TRB:CTCSAAKANSDYTF;TRA:CAASPNYNQGKLIF;TRA:CVLSAGFASALTF
clone_93_H11	clonotype78H11	4	TRB:CASSFEGGGNTLYF;TRA:CALRNSNNRIFF;TRA:CALRNYNQGKLIF;TRA:CALRNYNQGKLIF
clone_94_H11	clonotype80H11	4	TRB:CASSQEGTGGAETLYF;TRA:CAAGEQGTGSKLSF
clone_95_H11	clonotype81H11	4	TRB:CASSPDWGNYAEQFF;TRA:CAVSARTNKVVF;TRA:CAVSMDTEGADRLTF
clone_96_H11	clonotype88H11	4	TRB:CASSQDWGGYEQYF;TRA:CAASEANTGKLTF;TRA:CVLSAEGNYAQGLTF
clone_97_H11	clonotype91H11	4	TRB:CASSFGTKDTQYF;TRB:CSSRAGGQDTQYF;TRA:CALGRNSNNRIFF
clone_98_H11	clonotype92H11	4	TRB:CASSLGLSYEQYF;TRA:CALSPGYNKLTF;TRA:CAMREGTSSGQKLVF
clone_99_H11	clonotype93H11	4	TRB:CASSQESPASAETLYF;TRA:CATDTGGYKVVF
clone_100_H11	clonotype99H11	4	TRB:CASSIWGGYAEQFF;TRA:CAASDTGANTGKLTF
clone_101_H11	clonotype102H11	3	TRB:CASGDARGYNSPLYF;TRA:CAASEGGGLSGKLTF
clone_102_H11	clonotype103H11	3	TRB:CAISTGGNTGQLYF;TRA:CVPPVSNYNVLYF
clone_103_H11	clonotype104H11	3	TRB:CASSFSNQAPLF;TRA:CAPPREGYKVVF
clone_104_H11	clonotype109H11	3	TRB:CASSPRLGGDEQYF;TRA:CAGFNTGNYKYVF;TRA:CALSVNSGGSNAKLTF
clone_105_H11	clonotype111H11	3	TRB:CASSPRDRETEVFF;TRA:CAVSPYYNQGKLIF
clone_106_H11	clonotype118H11	3	TRB:CASSLGRASGNTLYF;TRA:CALVETQGGRALIF
clone_107_H11	clonotype120H11	3	TRB:CASSLLGGYNYAEQFF;TRA:CAMREGSGSNNRLTL
clone_108_H11	clonotype121H11	3	TRB:CASGDAWGRDTQYF;TRA:CALILQGGSAKLIF
clone_109_H11	clonotype123H11	3	TRB:CASSDGQYEQYF;TRB:CASSPQKIQDTQYF;TRA:CAASASSSFSKLVF
clone_110_H11	clonotype124H11	3	TRB:CSSRAGGQDTQYF;TRA:CALRGGGNKVVF
clone_111_H11	clonotype125H11	3	TRB:CASSADWGNYAEQFF;TRB:CASSGQGGSTEVFF;TRB:CGVGTGGNSDYTF;TRA:CAMRENTGGYKVVF
clone_112_H11	clonotype127H11	3	TRB:CGARARQDTEVFF;TRB:CGAREAGGFEQYF;TRA:CAARNSGSWQLIF
clone_113_H11	clonotype128H11	3	TRB:CGARDWGGQDTQYF;TRA:CAAEAGYNQGKLIF
clone_114_H11	clonotype130H11	3	TRB:CASSQETGGGNTLYF;TRA:CARDVGDNSKLIW
clone_115_H11	clonotype131H11	3	TRB:CASGREGRNSPLYF;TRA:CAAERGSSGNKLIF
clone_116_H11	clonotype134H11	3	TRB:CASSPGSAETLYF;TRA:CAASEPGLSGKLTF
clone_117_H11	clonotype136H11	3	TRB:CASGDARGYNSPLYF;TRA:CALRNYNQGKLIF;TRA:CAVYSNNRLTL
clone_118_H11	clonotype137H11	3	TRB:CASGEARGYNSPLYF;TRA:CALSLTSGGNYKPTF
clone_119_H11	clonotype139H11	3	TRB:CASNWGGDTQYF;TRB:CASSPWGASYEQYF;TRA:CALAYSNNRIFF
clone_120_H11	clonotype142H11	3	TRB:CASSLEQGSTEVFF;TRA:CAASKKSGGSNAKLTF;TRA:CAASMRPEGADRLTF
clone_121_H11	clonotype144H11	3	TRB:CASSRDRGPDTQYF;TRA:CALSVQGTGSKLSF
clone_122_H11	clonotype145H11	3	TRB:CTCSADIRGKDTQYF;TRA:CAVSDNNYAQGLTF
clone_123_H11	clonotype147H11	3	TRB:CASSIDRGHTGQLYF;TRA:CALSDHRGDNYAQGLTF
clone_124_H11	clonotype148H11	3	TRB:CASGDAQSNTEVFF;TRA:CALGNSGTYQRF;TRA:CAVRDGTNTGKLTF
clone_125_H11	clonotype149H11	3	TRB:CASSLPGHEQYF;TRA:CAAEALSNYNVLYF
clone_126_H11	clonotype151H11	3	TRB:CASGDAAANSDYTF;TRA:CALEHNAGAKLTF
clone_127_H11	clonotype58H11	3	TRB:CASSQEGRNERLFF;TRA:CAAGETEGADRLTF
clone_128_H11	clonotype73H11	3	TRB:CASSAGQGDTQYF;TRB:CGASGRGDTQYF;TRA:CAVSRGNEKITF
clone_129_H11	clonotype85H11	3	TRB:CASSLAGGRVTEVFF;TRB:CASSQANTEVFF;TRA:CALWTGYQNFYF
clone_130_H11	clonotype90H11	3	TRB:CASSRLGVYAEQFF;TRA:CAVSENYAQGLTF
clone_131_H11	clonotype98H11	3	TRB:CTCSAVRGRGDTQYF;TRA:CALSMGGSNAKLTF
clone_132_H11	clonotype107H11	2	TRB:CTCRDNQDTQYF;TRA:CAMEMGYKLTF
clone_133_H11	clonotype108H11	2	TRB:CASSSQGPNYAEQFF;TRA:CAPGTGGYKVVF;TRA:CAVRELAGNKLTF
clone_134_H11	clonotype110H11	2	TRB:CASSQEGQNTGQLYF;TRA:CALTRNNNNAPRF;TRA:CAMRVITGNTGKLIF
clone_135_H11	clonotype117H11	2	TRB:CASSPDRRDTQYF;TRB:CASSTVGLGVWEQYF;TRA:CALSDRDTNAYKVIF
clone_136_H11	clonotype119H11	2	TRB:CASSFTGKEVFF;TRB:CTCSAWASQNTLYF;TRA:CALSHTGSGGKLTL
clone_137_H11	clonotype122H11	2	TRB:CASGEGDTYAEQFF;TRA:CAADNMGYKLTF
clone_138_H11	clonotype126H11	2	TRB:CAWKGTGNQAPLF;TRA:CSASKTGGYKVVF
clone_139_H11	clonotype129H11	2	TRB:CASSDAWDTGQLYF;TRA:CAASRSSNNRIFF
clone_140_H11	clonotype133H11	2	TRB:CASSLTDTEVFF;TRA:CVLRSGGSNAKLTF
clone_141_H11	clonotype138H11	2	TRB:CASSQEGGSNERLFF;TRA:CAVSAGTGSNRLTF
clone_142_H11	clonotype141H11	2	TRB:CTCSYWGGYEQYF;TRA:CALRRNSNNRIFF
clone_143_H11	clonotype143H11	2	TRB:CTCSLGGRYAEQFF;TRA:CALSPGGSNAKLTF
clone_144_H11	clonotype146H11	2	TRB:CASSIEGTNAEQFF;TRA:CVLSGASSGQKLVF
clone_145_H11	clonotype150H11	2	TRB:CASGDSGNTLYF;TRA:CAAWYQGGSAKLIF
clone_146_H11	clonotype152H11	2	TRB:CASSPTGGWNTQYF;TRA:CAVSVNYGNEKITF
clone_147_H11	clonotype153H11	2	TRB:CASGDARGYNSPLYF;TRB:CASSGLGVSAETLYF;TRA:CALRNYNQGKLIF;TRA:CAVYSNNRLTL
clone_148_H11	clonotype154H11	2	TRB:CASGDARGYNSPLYF;TRA:CAVSEHRGGSGGKLTL
clone_149_H11	clonotype155H11	2	TRB:CASSLYGQGYAEQFF;TRA:CAASGTNTNKVVF;TRA:CALGPNTGYQNFYF
clone_150_H11	clonotype156H11	2	TRB:CGATGGAEVFF;TRB:CGAWTGGNSDYTF;TRA:CAADGGSALGRLHF
clone_151_H11	clonotype158H11	2	TRB:CASSIVGLGSAETLYF;TRA:CALNSNNRIFF
clone_152_H11	clonotype159H11	2	TRB:CASQQESQNTLYF;TRA:CAAEATGGYKVVF
clone_153_H11	clonotype160H11	2	TRB:CASSSDWRRYF;TRA:CAADGGSNYKLTF
clone_154_H11	clonotype162H11	2	TRB:CASSAGYNQAPLF;TRA:CAVDTNAYKVIF
clone_155_H11	clonotype163H11	2	TRB:CASSAGLGGNTGQLYF;TRB:CGARVGGDQDTQYF;TRA:CAAPRGSSGNKLIF;TRA:CALSDSNNRIFF
clone_156_H11	clonotype164H11	2	TRB:CASSGRSNYAEQFF;TRA:CAVSVSSNTNKVVF
clone_157_H11	clonotype165H11	2	TRB:CASSDQGGQNTLYF;TRA:CALGDRNTGYQNFYF
clone_158_H11	clonotype166H11	2	TRB:CGARDWGNTGQLYF;TRA:CAMREGRNTEGADRLTF
clone_159_H11	clonotype167H11	2	TRB:CAWSQEGQGSERLFF;TRA:CALSPSAGNKLTF
clone_160_H11	clonotype168H11	2	TRB:CASSHRNTEVFF;TRA:CAAWGTEGADRLTF
clone_161_H11	clonotype169H11	2	TRB:CASSDKANTGQLYF;TRA:CAASEGGSSGNKLIF;TRA:CAVSNTNKVVF
clone_162_H11	clonotype171H11	2	TRB:CASSQEGWGDTQYF;TRA:CALGNAGAKLTF;TRA:CIVTDGGRGSALGRLHF
clone_163_H11	clonotype172H11	2	TRB:CASGDAQSNTEVFF;TRA:CALGNSGTYQRF;TRA:CAVRDGTNTGKLTF
clone_164_H11	clonotype173H11	2	TRB:CASSQGGDNQAPLF;TRA:CAASPNNNAPRF
clone_165_H11	clonotype175H11	2	TRB:CASSPTGGGDGQYF;TRA:CALSDDSNNRIFF
clone_166_H11	clonotype176H11	2	TRB:CASSRGTFNQDTQYF;TRA:CAAKESNYQLIW
clone_167_H11	clonotype177H11	2	TRB:CASSDPDSGNTLYF;TRA:CALGNMGYKLTF
clone_168_H11	clonotype178H11	2	TRB:CASSLANQDTQYF;TRA:CAASANYNQGKLIF
clone_169_H11	clonotype180H11	2	TRB:CASSRLGEDTQYF;TRA:CAASKDSAGNKLTF
clone_170_H11	clonotype181H11	2	TRB:CTCSAQYAEQFF;TRA:CALGDPGSWQLIF
clone_171_H11	clonotype184H11	2	TRB:CASSLLGVYAEQFF;TRA:CAVSENYAQGLTF
clone_172_H11	clonotype185H11	2	TRB:CASSWGSSAETLYF;TRA:CALRGSNYNVLYF
clone_173_H11	clonotype189H11	2	TRB:CASSHQGGNYAEQFF;TRA:CASGSFNKLTF
clone_174_H11	clonotype192H11	2	TRB:CASSQVGGAGQNTLYF;TRA:CAASMDNTNKVVF
clone_175_H11	clonotype193H11	2	TRB:CASSLALGDYEQYF;TRA:CAAAYQGGRALIF;TRA:CAVSRNNTNTGKLTF
clone_176_H11	clonotype194H11	2	TRB:CASSLERGNSDYTF;TRA:CALSAITGNTGKLIF
clone_177_H11	clonotype195H11	2	TRB:CASSPRLGRYAEQFF;TRA:CAASMEPGGYKVVF
clone_178_H11	clonotype196H11	2	TRB:CASTPGLGGYEQYF;TRA:CAAATGGYKVVF;TRA:CAASRGNSNNRIFF
clone_179_H11	clonotype197H11	2	TRB:CASSPRAGRDSDYTF;TRB:CASSPRGSNERLFF;TRA:CALGDGNYAQGLTF
clone_180_H11	clonotype198H11	2	TRB:CASSQDGRTGGRTLYF;TRA:CAASAPNTNKVVF;TRA:CAVSASSNTNKVVF
clone_181_H11	clonotype199H11	2	TRB:CASSQGRANTEVFF;TRA:CASTPTGGNNKLTF
clone_182_H11	clonotype200H11	2	TRB:CASSLAGENSPLYF;TRA:CAASITGNTGKLIF
clone_183_H11	clonotype201H11	2	TRB:CSSRDGDRGYEQYF;TRA:CAVSAYQGGRALIF
clone_184_H11	clonotype203H11	2	TRB:CASSRPGQSAETLYF;TRA:CAAGTGGYKVVF
clone_185_H11	clonotype204H11	2	TRB:CTCSVRDRGYEQYF;TRA:CAARNYGNEKITF
clone_186_H11	clonotype205H11	2	TRB:CASSLEAGLVDTQYF;TRA:CALRSGSFNKLTF
clone_187_H11	clonotype206H11	2	TRB:CASSLDAGGQDTQYF;TRA:CALGSYGSSGNKLIF
clone_188_H11	clonotype208H11	2	TRB:CASSIRGANSDYTF;TRA:CVLSPWNSNNRIFF
clone_189_H11	clonotype209H11	2	TRB:CASSQRTFGNTLYF;TRA:CALGGPLNYAQGLTF
clone_190_H11	clonotype210H11	2	TRB:CTCSGTGGNYAEQFF;TRA:CVLSAKGKGNTGKLIF
clone_191_H11	clonotype211H11	2	TRB:CASSQDWGTYEQYF;TRA:CAASRNNAGAKLTF
clone_192_H11	clonotype212H11	2	TRB:CASGDGLF;TRA:CAVSLVGYKLTF
clone_193_H11	clonotype213H11	2	TRB:CASSPPGQTNERLFF;TRA:CAAPPPPGGNYKPTF;TRA:CAARVGGSALGRLHF
clone_194_H11	clonotype214H11	2	TRB:CASGREGRNSPLYF;TRA:CAAERGSSGNKLIF
clone_195_H11	clonotype215H11	2	TRB:CASSLEYEQYF;TRA:CAASAGGNNKLTF
clone_196_H11	clonotype216H11	2	TRB:CASSPRGEQYF;TRA:CALSTPGGNYKPTF
clone_197_H11	clonotype217H11	2	TRB:CASSLEYEQYF;TRA:CAASSGGNNKLTF
clone_198_H11	clonotype218H11	2	TRB:CASGDGSGNSDYTF;TRB:CASSPGQGAEQFF;TRA:CAWNYNQGKLIF
clone_199_H11	clonotype221H11	2	TRB:CASGDALGGREQYF;TRA:CAVSLWLTGNTGKLIF
clone_200_H11	clonotype223H11	2	TRB:CASSSDWDSYEQYF;TRA:CASFNNRIFF
clone_201_H11	clonotype224H11	2	TRB:CASGDAGQGSDYTF;TRA:CALERNAGAKLTF
clone_202_H11	clonotype225H11	2	TRB:CASGDALGGAEQFF;TRA:CAASMNYNQGKLIF
clone_203_H11	clonotype228H11	2	TRB:CASGENRGYNSPLYF;TRA:CAVSKNTGGLSGKLTF
clone_204_H11	clonotype230H11	2	TRB:CASGDPGGATDTQYF;TRA:CALERTGGYKVVF
clone_205_H11	clonotype232H11	2	TRB:CASGDLGGRRQDTQYF;TRA:CALSATPRGSAKLIF
clone_206_H11	clonotype57H11	2	TRB:CASSLEGWGVNQDTQYF
clone_207_H11	clonotype71H11	2	TRB:CASSPSGGYEQYF;TRA:CATGFASALTF
clone_208_H11	clonotype1000H11	1	TRB:CASSLGQGTEVFF;TRA:CAMREPDTNAYKVIF
clone_209_H11	clonotype1002H11	1	TRB:CASGDLGGSYEQYF;TRA:CALSDWDGSSGNKLIF
clone_210_H11	clonotype1003H11	1	TRB:CTCSAAISQNTLYF;TRB:CTCSTQDTQYF;TRA:CALSALPDSGYNKLTF
clone_211_H11	clonotype1004H11	1	TRB:CASSSAPYEQYF;TRA:CALGDHPGTGSNRLTF
clone_212_H11	clonotype1005H11	1	TRB:CASSPGGGAETLYF;TRB:CASSSGEDTQYF;TRA:CAANSGTYQRF
clone_213_H11	clonotype1006H11	1	TRB:CASSDQGRSAEQFF;TRA:CAAQGGSAKLIF
clone_214_H11	clonotype1008H11	1	TRB:CASSQRGDQNTLYF;TRA:CAASPLAQGLTF
clone_215_H11	clonotype1009H11	1	TRB:CASSLQGSNERLFF;TRA:CAATSSNTNKVVF
clone_216_H11	clonotype1011H11	1	TRB:CASSRGNTGQLYF;TRA:CAMRERDYGSSGNKLIF
clone_217_H11	clonotype1012H11	1	TRB:CASRQDSYEQYF;TRA:CAAASSGSWQLIF
clone_218_H11	clonotype1013H11	1	TRB:CASSPQGSEQYF;TRA:CAGNNAGAKLTF
clone_219_H11	clonotype1014H11	1	TRB:CASSLDTSAETLYF;TRA:CAATDTNTGKLTF
clone_220_H11	clonotype1015H11	1	TRB:CASSDTGGGHTQYF;TRA:CAASGTNTGKLTF
clone_221_H11	clonotype1016H11	1	TRB:CASGVGTANTEVFF;TRA:CAASGSNYNVLYF
clone_222_H11	clonotype1017H11	1	TRB:CASSPPGSTGQLYF;TRA:CAASAIGSAGNKLTF
clone_223_H11	clonotype1018H11	1	TRB:CASSNGLGVYEQYF;TRA:CAAVPGDYAQGLTF
clone_224_H11	clonotype1019H11	1	TRB:CASSGDPGRDTLYF;TRA:CALWELGGYKVVF
clone_225_H11	clonotype1020H11	1	TRB:CASSEGTGKGETLYF;TRA:CAASVVNTGNYKYVF
clone_226_H11	clonotype1021H11	1	TRB:CASSDALGRDAEQFF;TRA:CAASENYSNNRLTL
clone_227_H11	clonotype1022H11	1	TRB:CASNDRDQDTQYF;TRA:CAASDPGANTGKLTF
clone_228_H11	clonotype1023H11	1	TRB:CASSLTRNTEVFF;TRA:CAASGSGGSNAKLTF
clone_229_H11	clonotype1024H11	1	TRB:CASSQEAGGYEQYF;TRA:CAASEDGGLSGKLTF
clone_230_H11	clonotype1025H11	1	TRB:CASSQDFRNTEVFF;TRA:CAASSNSGGSNAKLTF
clone_231_H11	clonotype1026H11	1	TRB:CASSERQGGDTEVFF;TRA:CAASVRGSALGRLHF
clone_232_H11	clonotype1027H11	1	TRB:CASSYWGDTQYF;TRA:CAASPNTGANTGKLTF
clone_233_H11	clonotype1028H11	1	TRB:CASSQDLGGYTQYF;TRA:CALSDPAGGSAKLIF
clone_234_H11	clonotype1029H11	1	TRA:CAASATASLGKLQF
clone_235_H11	clonotype1031H11	1	TRA:CAVMGASGSWQLIF
clone_236_H11	clonotype1033H11	1	TRA:CAASTSGGNYKPTF
clone_237_H11	clonotype1035H11	1	TRA:CAASSGSALGRLHF
clone_238_H11	clonotype1036H11	1	TRA:CAASWAEGADRLTF
clone_239_H11	clonotype1037H11	1	TRA:CAARDNTNTGKLTF
clone_240_H11	clonotype1038H11	1	TRB:CASSIRDTQYF
clone_241_H11	clonotype1039H11	1	TRA:CVLGDRNAGAKLTF
clone_242_H11	clonotype1040H11	1	TRA:CAASSNNNAPRF
clone_243_H11	clonotype1041H11	1	TRA:CAMGTGGLSGKLTF
clone_244_H11	clonotype1042H11	1	TRA:CAMERNTGANTGKLTF
clone_245_H11	clonotype1043H11	1	TRB:CASTLRGGRAEQFF
clone_246_H11	clonotype1045H11	1	TRB:CASSPLGGLAEQFF
clone_247_H11	clonotype1047H11	1	TRB:CASSDRGGNTEVFF
clone_248_H11	clonotype1048H11	1	TRB:CASSLEGAGTEVFF
clone_249_H11	clonotype1049H11	1	TRB:CASSLDRGQDTQYF
clone_250_H11	clonotype1050H11	1	TRB:CASSFRGSQNTLYF
clone_251_H11	clonotype1051H11	1	TRB:CASSFGGSAETLYF
clone_252_H11	clonotype1052H11	1	TRB:CASSQETGGQNTLYF
clone_253_H11	clonotype1054H11	1	TRB:CASSQEGQNTGQLYF
clone_254_H11	clonotype1055H11	1	TRB:CASSQEGQNTGQLYF
clone_255_H11	clonotype1056H11	1	TRB:CASSQEGQNTGQLYF
clone_256_H11	clonotype1057H11	1	TRB:CASSQEGQNTGQLYF
clone_257_H11	clonotype1058H11	1	TRB:CASSQEGGSNERLFF
clone_258_H11	clonotype1059H11	1	TRB:CASSQEGGSNERLFF
clone_259_H11	clonotype1060H11	1	TRB:CASSQEGGSNERLFF
clone_260_H11	clonotype1061H11	1	TRB:CASSQEGGSNERLFF
clone_261_H11	clonotype1062H11	1	TRB:CASSQDEGQNTEVFF
clone_262_H11	clonotype1064H11	1	TRB:CASSQGGGRYAEQFF
clone_263_H11	clonotype1065H11	1	TRB:CASSLMTDNYAEQFF
clone_264_H11	clonotype1067H11	1	TRA:CAAWYQGGSAKLIF
clone_265_H11	clonotype1068H11	1	TRA:CALSGATGYQNFYF
clone_266_H11	clonotype1069H11	1	TRA:CALIATSSGQKLVF
clone_267_H11	clonotype1070H11	1	TRA:CAVSAMRNNRIFF
clone_268_H11	clonotype1071H11	1	TRA:CAVSRGGNYKPTF
clone_269_H11	clonotype1072H11	1	TRA:CALTGSAGNKLTF
clone_270_H11	clonotype1073H11	1	TRA:CAVSANYGNEKITF
clone_271_H11	clonotype1074H11	1	TRB:CAWSLTGGGSQDTQYF
clone_272_H11	clonotype1075H11	1	TRB:CAWSLAAGANTGQLYF
clone_273_H11	clonotype1076H11	1	TRB:CASRRDSQDTQYF
clone_274_H11	clonotype1077H11	1	TRB:CASSTGDSYEQYF
clone_275_H11	clonotype1079H11	1	TRB:CASSPGRNSPLYF
clone_276_H11	clonotype1080H11	1	TRB:CASSLGQFWQLYF
clone_277_H11	clonotype1081H11	1	TRB:CASSSGSSYEQYF
clone_278_H11	clonotype1083H11	1	TRB:CASSLQANTEVFF
clone_279_H11	clonotype1085H11	1	TRB:CASSLDGADTQYF
clone_280_H11	clonotype1086H11	1	TRB:CASSLGSGNTLYF
clone_281_H11	clonotype1087H11	1	TRB:CASSLVRGREQYF
clone_282_H11	clonotype1088H11	1	TRB:CASSLVLNERLFF
clone_283_H11	clonotype1089H11	1	TRB:CASSLTTNSDYTF
clone_284_H11	clonotype1090H11	1	TRB:CASSRELGGDEQYF
clone_285_H11	clonotype1091H11	1	TRB:CASSRRLGYAEQFF
clone_286_H11	clonotype1092H11	1	TRB:CASSSRTGVDTQYF
clone_287_H11	clonotype1093H11	1	TRB:CASRGQANTEVFF
clone_288_H11	clonotype1094H11	1	TRB:CASSPRQYAEQFF
clone_289_H11	clonotype1095H11	1	TRB:CASSPRQENTLYF
clone_290_H11	clonotype1096H11	1	TRB:CASSLDWQNTLYF
clone_291_H11	clonotype1097H11	1	TRB:CASSLEGHYEQYF
clone_292_H11	clonotype1098H11	1	TRB:CASSLDEDTEVFF
clone_293_H11	clonotype1099H11	1	TRB:CASSLGSQNTLYF
clone_294_H11	clonotype1100H11	1	TRB:CASSFRDKDTQYF
clone_295_H11	clonotype1101H11	1	TRB:CASSFRDSYEQYF
clone_296_H11	clonotype1102H11	1	TRB:CASSFAGNTEVFF
clone_297_H11	clonotype1103H11	1	TRB:CASSLAGGNEQYF
clone_298_H11	clonotype1104H11	1	TRB:CASSLAGGNEQYF
clone_299_H11	clonotype1105H11	1	TRB:CASRWGGQDTQYF
clone_300_H11	clonotype1106H11	1	TRB:CASRGTIQDTQYF
clone_301_H11	clonotype1107H11	1	TRB:CASSLPGGYEQYF
clone_302_H11	clonotype1108H11	1	TRB:CASSLGGRVEQYF
clone_303_H11	clonotype1109H11	1	TRB:CASSQDSAETLYF
clone_304_H11	clonotype1110H11	1	TRB:CASSQGAGNTLYF
clone_305_H11	clonotype1111H11	1	TRB:CASSQGGQNTLYF
clone_306_H11	clonotype1112H11	1	TRB:CASSLQGRTEVFF
clone_307_H11	clonotype1113H11	1	TRB:CASSLGLSYEQYF
clone_308_H11	clonotype1114H11	1	TRB:CASSRQNYAEQFF
clone_309_H11	clonotype1115H11	1	TRB:CASSPRLGYEQYF
clone_310_H11	clonotype1117H11	1	TRB:CASNPGLGVEQYF
clone_311_H11	clonotype1118H11	1	TRB:CASSLRDRGQVFF
clone_312_H11	clonotype1120H11	1	TRB:CASSAGSQNTLYF
clone_313_H11	clonotype1121H11	1	TRB:CASSWGGQDTQYF
clone_314_H11	clonotype1122H11	1	TRB:CASSPGTEETLYF
clone_315_H11	clonotype1123H11	1	TRB:CASSRDRAETLYF
clone_316_H11	clonotype1124H11	1	TRB:CASSFGTKDTQYF
clone_317_H11	clonotype1125H11	1	TRB:CASSLGVNTEVFF
clone_318_H11	clonotype1126H11	1	TRB:CASSFYNYAEQFF
clone_319_H11	clonotype1127H11	1	TRB:CASSFSGGAEQYF
clone_320_H11	clonotype1128H11	1	TRB:CASKELGGNQNTLYF
clone_321_H11	clonotype1131H11	1	TRB:CASSGIRFSNERLFF
clone_322_H11	clonotype1132H11	1	TRB:CASSPTGGAPGQLYF
clone_323_H11	clonotype1133H11	1	TRB:CASSEGDRGTGQLYF
clone_324_H11	clonotype1134H11	1	TRB:CASSDLTGVQDTQYF
clone_325_H11	clonotype1135H11	1	TRB:CASSDLTGVQDTQYF
clone_326_H11	clonotype1137H11	1	TRB:CASSDAGGSGNTLYF
clone_327_H11	clonotype1138H11	1	TRB:CASSDGTGPNERLFF
clone_328_H11	clonotype1139H11	1	TRB:CASSDSGQVQNTLYF
clone_329_H11	clonotype1141H11	1	TRB:CASSGGGRVQNTLYF
clone_330_H11	clonotype1142H11	1	TRB:CASSGLGGNTGQLYF
clone_331_H11	clonotype1143H11	1	TRB:CASSVLGANTGQLYF
clone_332_H11	clonotype1144H11	1	TRB:CASAGPGQGDTEVFF
clone_333_H11	clonotype1146H11	1	TRB:CASGDAAGSNSDYTF
clone_334_H11	clonotype1147H11	1	TRB:CASGASGGSSYEQYF
clone_335_H11	clonotype1149H11	1	TRB:CASSDLGGLFSYEQYF
clone_336_H11	clonotype1150H11	1	TRB:CASSQVRDDTEVFF
clone_337_H11	clonotype1151H11	1	TRB:CASSQVGSQNTLYF
clone_338_H11	clonotype1152H11	1	TRB:CAIGRGGHAETLYF
clone_339_H11	clonotype1153H11	1	TRB:CASSPGLGGQEQYF
clone_340_H11	clonotype1154H11	1	TRB:CASSRLGNYAEQFF
clone_341_H11	clonotype1155H11	1	TRB:CASSRRLGDDTQYF
clone_342_H11	clonotype1156H11	1	TRB:CASSYSGGPSEQYF
clone_343_H11	clonotype1157H11	1	TRB:CASSSGLGQDTQYF
clone_344_H11	clonotype1158H11	1	TRB:CASSSQGHAETLYF
clone_345_H11	clonotype1159H11	1	TRB:CASSFQGSQNTLYF
clone_346_H11	clonotype115H11	1	TRB:CASSLYATTNSDYTF;TRA:CASGTGGYKVVF
clone_347_H11	clonotype1160H11	1	TRB:CASSFQGARAEQFF
clone_348_H11	clonotype1161H11	1	TRB:CSSSPGQFYEQYF
clone_349_H11	clonotype1162H11	1	TRB:CTCKRSQDTQYF
clone_350_H11	clonotype1163H11	1	TRB:CTCSPSTDTQYF
clone_351_H11	clonotype1164H11	1	TRB:CTCSANRVEQYF
clone_352_H11	clonotype1165H11	1	TRB:CTCSAHFYEQYF
clone_353_H11	clonotype1166H11	1	TRB:CTCSAGQTEVFF
clone_354_H11	clonotype1167H11	1	TRB:CTCSALRTEVFF
clone_355_H11	clonotype1168H11	1	TRB:CTCSVTEYEQYF
clone_356_H11	clonotype1169H11	1	TRB:CGARDHSGGARAEQFF
clone_357_H11	clonotype1170H11	1	TRB:CGARDPVRASAETLYF
clone_358_H11	clonotype1172H11	1	TRB:CASSRGRGTNTEVFF;TRA:CALSAYGNEKITF;TRA:CVPGDYKYVF
clone_359_H11	clonotype1173H11	1	TRB:CASSLRGEDTQYF;TRA:CILRDNNNAPRF
clone_360_H11	clonotype1174H11	1	TRB:CASSPGGANTLYF;TRB:CASSTGGRNEQYF;TRA:CAAGQQGTGSKLSF;TRA:CATDSNNRIFF
clone_361_H11	clonotype1175H11	1	TRB:CASSDGESSAETLYF;TRA:CAINAYKVIF
clone_362_H11	clonotype1176H11	1	TRB:CASGEARGYNSPLYF;TRB:CASSLSGTIYEQYF;TRA:CALSLTSGGNYKPTF;TRA:CILHTGYQNFYF
clone_363_H11	clonotype1177H11	1	TRB:CASSDAWTGDSYEQYF;TRB:CASSPDRDANSDYTF;TRA:CAISNNRIFF;TRA:CALSDLTQVVGQLTF
clone_364_H11	clonotype1178H11	1	TRB:CASGTFSAETLYF;TRA:CALGAGAKLTF
clone_365_H11	clonotype1179H11	1	TRB:CASRGDRSNTEVFF;TRA:CAKGGSAKLIF
clone_366_H11	clonotype1180H11	1	TRB:CASSFGGDAEQFF;TRA:CATEAGGYKVVF
clone_367_H11	clonotype1181H11	1	TRB:CASSDDHPPSAETLYF;TRB:CASSPSGTGDQAPLF;TRA:CATGHSGTYQRF
clone_368_H11	clonotype1182H11	1	TRB:CASSQRGSGNTLYF;TRA:CILRQGTGSKLSF
clone_369_H11	clonotype1184H11	1	TRB:CASSQRTGSSYEQYF;TRA:CAAEANYNVLYF
clone_370_H11	clonotype1185H11	1	TRB:CASSWTNNQAPLF;TRA:CAVGTNAYKVIF
clone_371_H11	clonotype1186H11	1	TRB:CASSPGQSSYEQYF;TRB:CASSRLGGVRAEQFF;TRA:CVLSRGYQNFYF
clone_372_H11	clonotype1187H11	1	TRB:CASSPDSAETLYF;TRA:CAAPSNYNVLYF
clone_373_H11	clonotype1188H11	1	TRB:CASSLGGQNTLYF;TRA:CVKGAGGYKVVF
clone_374_H11	clonotype1189H11	1	TRB:CASSKGQGYEQYF;TRA:CALANMGYKLTF
clone_375_H11	clonotype1190H11	1	TRB:CASSFGTKDTQYF;TRB:CASSLGLGDTLYF;TRA:CAAVSNYNVLYF;TRA:CALGRNSNNRIFF
clone_376_H11	clonotype1191H11	1	TRB:CASSIGYEQYF;TRA:CAMATGGNNKLTF
clone_377_H11	clonotype1192H11	1	TRB:CASSYPGTGRAPLF;TRA:CAVNNNAGAKLTF
clone_378_H11	clonotype1193H11	1	TRB:CASSQDPTSAETLYF;TRA:CAIEGSSFSKLVF
clone_379_H11	clonotype1194H11	1	TRB:CASSQVQGTDTEVFF;TRA:CAVKTSSGQKLVF
clone_380_H11	clonotype1195H11	1	TRB:CAWTGQGAENQDTQYF;TRA:CAGSSSSFSKLVF
clone_381_H11	clonotype1196H11	1	TRB:CASRRESSYEQYF;TRA:CATASLGKLQF
clone_382_H11	clonotype1197H11	1	TRB:CASSIPDFSNERLFF;TRB:CASSLGQNAEQFF;TRA:CAAAPGGNNKLTF
clone_383_H11	clonotype1198H11	1	TRB:CASRPGHNSDYTF;TRB:CASSLSDTGGHYAEQFF;TRA:CALNMGYKLTF
clone_384_H11	clonotype1199H11	1	TRB:CASSDGGQGAETLYF;TRB:CASSMARGDTEVFF;TRA:CATPVNTGNYKYVF
clone_385_H11	clonotype1200H11	1	TRB:CASSSGLGVGDTQYF;TRA:CAAEGPSFSKLVF
clone_386_H11	clonotype1201H11	1	TRB:CASSSRGDSYEQYF;TRA:CAAPNKVVF
clone_387_H11	clonotype1202H11	1	TRB:CTCSAGGYEQYF;TRA:CTAHVGDNSKLIW
clone_388_H11	clonotype1203H11	1	TRB:CASSIRDTQYF;TRA:CAVSDNNNAPRF
clone_389_H11	clonotype1204H11	1	TRB:CASSRDWGQYF;TRA:CAPRMRNNNNAPRF
clone_390_H11	clonotype1205H11	1	TRB:CASSPGQTNSDYTF;TRA:CALNTNTGKLTF
clone_391_H11	clonotype1206H11	1	TRB:CASSGGQGAETLYF;TRA:CAVYQGGRALIF
clone_392_H11	clonotype1207H11	1	TRB:CASSQDWGSQNTLYF;TRA:CALGVTGSGGKLTL
clone_393_H11	clonotype1208H11	1	TRB:CAWVPLGGSSAETLYF;TRA:CAAEDYYGNEKITF
clone_394_H11	clonotype1209H11	1	TRB:CASSGTGNTEVFF;TRA:CAAMSNYNVLYF
clone_395_H11	clonotype1210H11	1	TRB:CASSSKGNSDYTF;TRA:CAIDLTGNTGKLIF
clone_396_H11	clonotype1211H11	1	TRB:CASSLGRQNTLYF;TRA:CAAVTTGGNNKLTF
clone_397_H11	clonotype1212H11	1	TRB:CASSPSGGTEVFF;TRA:CALSGGGKLIF
clone_398_H11	clonotype1213H11	1	TRB:CASGDAQSNTEVFF;TRB:CASSPQANTEVFF;TRA:CALGNSGTYQRF;TRA:CAVRDGTNTGKLTF
clone_399_H11	clonotype1214H11	1	TRB:CASSLGFQNTLYF;TRA:CALNYNQGKLIF
clone_400_H11	clonotype1215H11	1	TRB:CASSLQGQNTLYF;TRA:CAVLVNTGNYKYVF
clone_401_H11	clonotype1216H11	1	TRB:CASSLTTNSDYTF;TRA:CAARANTNKVVF
clone_402_H11	clonotype1217H11	1	TRB:CASSFRDYYEQYF;TRA:CAARSNYNVLYF
clone_403_H11	clonotype1218H11	1	TRB:CASSFWGGAEQFF;TRA:CALELDTGYQNFYF
clone_404_H11	clonotype1219H11	1	TRB:CASSLDGGFEQYF;TRA:CALRTGGYKVVF
clone_405_H11	clonotype1220H11	1	TRB:CASSPDWGFQDTQYF;TRB:CASSTGTGGNTEVFF;TRA:CAVSSNTNKVVF
clone_406_H11	clonotype1221H11	1	TRB:CASSDRQGGNSDYTF;TRA:CAAEEDYNQGKLIF
clone_407_H11	clonotype1223H11	1	TRB:CASRGTGGASNERLFF;TRA:CAPHRGSALGRLHF
clone_408_H11	clonotype1224H11	1	TRB:CASSQELGGDTQYF;TRA:CAAEIMSNYNVLYF;TRA:CAMGSNYNQGKLIF
clone_409_H11	clonotype1226H11	1	TRB:CASSLTGGNSDYTF;TRA:CAAEVNNAGAKLTF
clone_410_H11	clonotype1227H11	1	TRB:CASSLGLGGFEQYF;TRA:CAMERRTNTGKLTF;TRA:CASTSSGSWQLIF
clone_411_H11	clonotype1228H11	1	TRB:CTCSAQGAEVFF;TRA:CAVGNMGYKLTF
clone_412_H11	clonotype1229H11	1	TRB:CTCSAERYEQYF;TRA:CAAGLTGNTGKLIF
clone_413_H11	clonotype1230H11	1	TRB:CASSQTGQGRDTQYF;TRA:CAAASSGSWQLIF
clone_414_H11	clonotype1231H11	1	TRB:CASSQEGGREDTQYF;TRA:CAAHDTNAYKVIF
clone_415_H11	clonotype1232H11	1	TRB:CASSPEGGSGNTLYF;TRA:CALSGTNTGKLTF
clone_416_H11	clonotype1233H11	1	TRB:CASSRDWGGHDTQYF;TRA:CALRGQGGRALIF
clone_417_H11	clonotype1235H11	1	TRB:CASSPEGVDTQYF;TRA:CALEHSGGSNAKLTF
clone_418_H11	clonotype1236H11	1	TRB:CASSAGQGETLYF;TRA:CAVSTSGSWQLIF
clone_419_H11	clonotype1237H11	1	TRB:CASSLRGITEVFF;TRA:CAAGDSGGSNAKLTF
clone_420_H11	clonotype1238H11	1	TRB:CASSLADNYEQYF;TRA:CAVSANNNNAPRF
clone_421_H11	clonotype1239H11	1	TRB:CASSLEGSDTQYF;TRA:CAMEHSGGSNAKLTF
clone_422_H11	clonotype1240H11	1	TRB:CASSRTGDAETLYF;TRA:CAAASSGSWQLIF
clone_423_H11	clonotype1241H11	1	TRB:CASSFSSQNTLYF;TRA:CAVRKNSNNRIFF
clone_424_H11	clonotype1242H11	1	TRB:CASSFGSGNTLYF;TRA:CALALASSSFSKLVF
clone_425_H11	clonotype1243H11	1	TRB:CASSLGQGGTLYF;TRA:CALSPLDVGDNSKLIW;TRA:CAVTPSNYNVLYF
clone_426_H11	clonotype1244H11	1	TRB:CASSFQVNTEVFF;TRA:CAASGGGSWQLIF
clone_427_H11	clonotype1245H11	1	TRB:CASSEQGADTGQLYF;TRA:CAAGGGNRIFF
clone_428_H11	clonotype1246H11	1	TRB:CASSERDRGAETLYF;TRA:CAVSMTNAYKVIF
clone_429_H11	clonotype1247H11	1	TRB:CASSDGTISNERLFF;TRA:CAVKPSSFSKLVF
clone_430_H11	clonotype1248H11	1	TRB:CASSGRTGWHTEVFF;TRA:CAAEVYDTNAYKVIF
clone_431_H11	clonotype1250H11	1	TRB:CASSQDYRGAEQFF;TRA:CAVSMSNYNVLYF
clone_432_H11	clonotype1251H11	1	TRB:CASSQGTANTEVFF;TRA:CALGDQGGRALIF;TRA:CAVSEPSGSWQLIF
clone_433_H11	clonotype1252H11	1	TRB:CASSVRDANTEVFF;TRA:CAVSAGMGYKLTF
clone_434_H11	clonotype1253H11	1	TRB:CASQTGVDTGQLYF;TRA:CAVSPNSNNRIFF
clone_435_H11	clonotype1255H11	1	TRB:CTCSPQGFEQYF;TRA:CAVSGNNRIFF
clone_436_H11	clonotype1256H11	1	TRB:CASTATGNYAEQFF;TRA:CAASSSSGSWQLIF
clone_437_H11	clonotype1257H11	1	TRB:CASSSGTSNTEVFF;TRA:CALSPNNYAQGLTF
clone_438_H11	clonotype1258H11	1	TRB:CASSQDRGSAETLYF;TRA:CAVSAGNYAQGLTF
clone_439_H11	clonotype1259H11	1	TRB:CASSQTGTGDERLFF;TRA:CAVSMSNYNVLYF
clone_440_H11	clonotype1260H11	1	TRB:CASSPGTKDTQYF;TRA:CAASRAGNTGKLIF
clone_441_H11	clonotype1261H11	1	TRB:CASSSGLVNTLYF;TRA:CAVSPNNNNAPRF
clone_442_H11	clonotype1262H11	1	TRB:CASSRAVSNERLFF;TRA:CAASPSNYQLIW
clone_443_H11	clonotype1264H11	1	TRB:CASSLDWGKEQYF;TRB:CASSPGTGGAENNQAPLF;TRA:CAVLSNYNVLYF
clone_444_H11	clonotype1265H11	1	TRB:CASSLGSQNTLYF;TRA:CATETTASLGKLQF
clone_445_H11	clonotype1266H11	1	TRB:CASRDNANTEVFF;TRA:CAMRENTGNYKYVF
clone_446_H11	clonotype1267H11	1	TRB:CASSSTGQNTLYF;TRA:CAVSSNSAGNKLTF
clone_447_H11	clonotype1268H11	1	TRB:CASSLGTYAEQFF;TRA:CALGNNAGAKLTF
clone_448_H11	clonotype1269H11	1	TRB:CASSEGTGGGERLFF;TRA:CALKGYANKMIF
clone_449_H11	clonotype1270H11	1	TRB:CASSDRTGATGQLYF;TRB:CASSIRLGAKDTQYF;TRA:CATDAMSNYNVLYF
clone_450_H11	clonotype1271H11	1	TRB:CASSDEGSNQDTQYF;TRA:CAVSPYQGGRALIF
clone_451_H11	clonotype1272H11	1	TRB:CASSDAPGGDSDYTF;TRA:CATAASSGSWQLIF
clone_452_H11	clonotype1274H11	1	TRB:CASGSRDRDEDTQYF;TRA:CAGMTNSAGNKLTF
clone_453_H11	clonotype1275H11	1	TRB:CASGDPLGNTGQLYF;TRA:CAASNNYNVLYF
clone_454_H11	clonotype1276H11	1	TRB:CASGDATASQNTLYF;TRA:CALNNAGAKLTF
clone_455_H11	clonotype1277H11	1	TRB:CASGDGTVSQNTLYF;TRA:CAVSPSSNTNKVVF
clone_456_H11	clonotype1278H11	1	TRB:CASSGGLGGPAETLYF;TRA:CAVSSTASLGKLQF
clone_457_H11	clonotype1279H11	1	TRB:CASSQEDSSYEQYF;TRA:CAVRGSGGNYKPTF;TRA:CVLGDHSNNRLTL
clone_458_H11	clonotype1280H11	1	TRB:CASSHGTGGLEQYF;TRB:CASSTQDRSETLYF;TRA:CAASAAGNTGKLIF;TRA:CVLDNNAGAKLTF
clone_459_H11	clonotype1281H11	1	TRB:CASSDGTGVDQAPLF;TRB:CASSPGTFNERLFF;TRA:CAVSIGSGYNKLTF
clone_460_H11	clonotype1282H11	1	TRB:CASSWTGGAYEQYF;TRA:CAARMNYNQGKLIF
clone_461_H11	clonotype1283H11	1	TRB:CTCSAPDYEQYF;TRA:CALEDSGYQNFYF
clone_462_H11	clonotype1284H11	1	TRB:CASRSQNTLYF;TRA:CAAGDRGSALGRLHF
clone_463_H11	clonotype1285H11	1	TRB:CASSPTAYEQYF;TRB:CASTRDRGNSDYTF;TRA:CAVTSTGGYKVVF
clone_464_H11	clonotype1286H11	1	TRB:CASSLKGHQDTQYF;TRA:CAGGGASSSFSKLVF
clone_465_H11	clonotype1287H11	1	TRB:CASGDSRVGTEVFF;TRB:CASSLSSGGETLYF;TRA:CAADSGYNKLTF;TRA:CALGNNNNAPRF
clone_466_H11	clonotype1288H11	1	TRB:CASSQDRLGGLEQYF;TRA:CVLGEGSAGNKLTF
clone_467_H11	clonotype1289H11	1	TRB:CASSLEDSYEQYF;TRA:CAVSAPGNTGKLIF
clone_468_H11	clonotype1290H11	1	TRB:CASSLGSQNTLYF;TRA:CAVSGTSGGNYKPTF
clone_469_H11	clonotype1292H11	1	TRB:CASRDTGGGEQYF;TRA:CALSRTSGGNYKPTF
clone_470_H11	clonotype1293H11	1	TRB:CASSLAAGYEQYF;TRA:CAVSAGGNYKPTF
clone_471_H11	clonotype1294H11	1	TRB:CASSLETGGSWEQYF;TRB:CASSLGNYAEQFF;TRA:CALVENNNAPRF;TRA:CAVSEANTNKVVF
clone_472_H11	clonotype1295H11	1	TRB:CASSFQGQDTQYF;TRA:CALSASNNRIFF
clone_473_H11	clonotype1296H11	1	TRB:CASSLGGAETLYF;TRA:CAAIGQGGRALIF
clone_474_H11	clonotype1297H11	1	TRB:CASSFGRGYEQYF;TRA:CAASGRGSALGRLHF
clone_475_H11	clonotype1298H11	1	TRB:CASRHRGANTGQLYF;TRA:CAASKSSNNRIFF;TRA:CALSDESNNRIFF
clone_476_H11	clonotype1299H11	1	TRB:CASRGWGGNYAEQFF;TRA:CAASPGANTGKLTF;TRA:CAGANTGYQNFYF
clone_477_H11	clonotype1300H11	1	TRB:CASSDAAVSNERLFF;TRA:CAASKNYAQGLTF
clone_478_H11	clonotype1302H11	1	TRB:CASGDSGINQDTQYF;TRA:CAAHVGSNYQLIW
clone_479_H11	clonotype1303H11	1	TRB:CASGVPGQGGNTLYF;TRA:CALLNTGNYKYVF
clone_480_H11	clonotype1304H11	1	TRB:CASSLDRNTGQLYF;TRB:CASSWDWGQDTQYF;TRA:CAVSGNTGNYKYVF
clone_481_H11	clonotype1305H11	1	TRB:CASSWDRVYAEQFF;TRA:CAASRDSGTYQRF
clone_482_H11	clonotype1306H11	1	TRB:CASSLLGEGDTQYF;TRA:CARGSALGRLHF
clone_483_H11	clonotype1307H11	1	TRB:CASSGGTGGVAPLF;TRA:CAVSGVITGNTGKLIF
clone_484_H11	clonotype1309H11	1	TRB:CASGDAQGRDTGQLYF;TRB:CASSQEGSNTGQLYF;TRA:CALSDGTNAYKVIF
clone_485_H11	clonotype1310H11	1	TRB:CASSQEGTGGTEVFF;TRA:CAASTGANTGKLTF
clone_486_H11	clonotype1311H11	1	TRB:CASSQEWGDSYEQYF;TRA:CAASEHWVGDNSKLIW
clone_487_H11	clonotype1312H11	1	TRB:CASSQDGSNNQAPLF;TRA:CAVSGSGSFNKLTF
clone_488_H11	clonotype1313H11	1	TRB:CASSQGGQYNSPLYF;TRA:CALNYGSSGNKLIF
clone_489_H11	clonotype1314H11	1	TRB:CASSRQGNSGNTLYF;TRB:CASSSGGGDTQYF;TRA:CAAAKLTF;TRA:CAAHQGGSAKLIF
clone_490_H11	clonotype1315H11	1	TRB:CASSLARRYEQYF;TRA:CAVSALSGGSNYKLTF
clone_491_H11	clonotype1316H11	1	TRB:CASSLTGGAEQFF;TRA:CALAPYQGGRALIF
clone_492_H11	clonotype1317H11	1	TRB:CASSEIGDSDYTF;TRA:CAASWDSGYNKLTF
clone_493_H11	clonotype1319H11	1	TRB:CASSLGLENTLYF;TRA:CALSITGNTGKLIF
clone_494_H11	clonotype1320H11	1	TRB:CASSRDRDAEQFF;TRA:CAPGFASALTF
clone_495_H11	clonotype1321H11	1	TRB:CASSLGQQDTQYF;TRA:CVLSAPGANTGKLTF
clone_496_H11	clonotype1322H11	1	TRB:CASSLAGGYEQYF;TRA:CALGYGSSGNKLIF
clone_497_H11	clonotype1323H11	1	TRB:CASSLGGGATLYF;TRA:CAARATGGNNKLTF;TRA:CAMREGSGGSNYKLTF
clone_498_H11	clonotype1325H11	1	TRB:CASSDAGRNNSPLYF;TRA:CVLGRMNYNQGKLIF
clone_499_H11	clonotype1326H11	1	TRB:CASSDGGQSNERLFF;TRA:CAASTAGNTGKLIF
clone_500_H11	clonotype1327H11	1	TRB:CASSAGTGGIEQYF;TRB:CASSGTGGADTGQLYF;TRA:CAVSSNTNTGKLTF
clone_501_H11	clonotype1328H11	1	TRB:CASSQETGQNTLYF;TRA:CAVSAGTGGYKVVF
clone_502_H11	clonotype1329H11	1	TRB:CASSQVGGYAEQFF;TRA:CALSPRGSALGRLHF
clone_503_H11	clonotype1330H11	1	TRB:CASSRTGNTGQLYF;TRA:CAVSAGNSGTYQRF
clone_504_H11	clonotype1331H11	1	TRB:CASSGDRIQNTLYF;TRA:CAVDNTNTGKLTF
clone_505_H11	clonotype1332H11	1	TRB:CTCSGVGAEQYF;TRA:CALSEGNMGYKLTF
clone_506_H11	clonotype1333H11	1	TRB:CASSFWGRTGQLYF;TRA:CALGDRDNYAQGLTF
clone_507_H11	clonotype1334H11	1	TRB:CASSQEGQGSYEQYF;TRA:CALGGATGGNNKLTF
clone_508_H11	clonotype1335H11	1	TRB:CASSQEGDWGDEQYF;TRA:CAADLASSSFSKLVF
clone_509_H11	clonotype1336H11	1	TRB:CASSQGTGGSYEQYF;TRA:CALVMNYNQGKLIF
clone_510_H11	clonotype1337H11	1	TRB:CASSHPGNSSYEQYF;TRA:CAASPYDTNAYKVIF
clone_511_H11	clonotype1338H11	1	TRB:CASSPQANTEVFF;TRA:CALGYTGANTGKLTF
clone_512_H11	clonotype1339H11	1	TRB:CASSLTDKYEQYF;TRA:CALGDYNQGKLIF
clone_513_H11	clonotype1340H11	1	TRB:CASSLQGGNTLYF;TRA:CAVSDNVGDNSKLIW
clone_514_H11	clonotype1341H11	1	TRB:CASSLQPNERLFF;TRA:CALKGDYSNNRLTL
clone_515_H11	clonotype1342H11	1	TRB:CASSLEGGYEQYF;TRA:CALRDYTGGNNKLTF
clone_516_H11	clonotype1343H11	1	TRB:CASSLDNQDTQYF;TRA:CAAIMTTASLGKLQF;TRA:CALGNTNTGKLTF
clone_517_H11	clonotype1344H11	1	TRB:CASSLSGTYQDTQYF;TRA:CALGDQGTGGYKVVF
clone_518_H11	clonotype1345H11	1	TRB:CASSQEAGGAEQFF;TRA:CATTEAYGNEKITF
clone_519_H11	clonotype1346H11	1	TRB:CASSQSPANSDYTF;TRA:CAASRVNTGNYKYVF
clone_520_H11	clonotype1347H11	1	TRB:CASKLGGGQNTLYF;TRA:CALSDNNAGAKLTF
clone_521_H11	clonotype1348H11	1	TRB:CASSLWGNTGQLYF;TRA:CAARRRGGSNYKLTF
clone_522_H11	clonotype1349H11	1	TRB:CTCSEQGAEVFF;TRA:CVVGDRGSALGRLHF
clone_523_H11	clonotype1351H11	1	TRB:CTCSAGTYEQYF;TRA:CALSAHNNAGAKLTF
clone_524_H11	clonotype1352H11	1	TRB:CASSQEGSNTGQLYF;TRA:CAMRGITGNTGKLIF
clone_525_H11	clonotype1353H11	1	TRB:CASSQESDNYAEQFF;TRA:CALGDRTGGYKVVF
clone_526_H11	clonotype1354H11	1	TRB:CASSPRGSSAETLYF;TRA:CALGEAGSFNKLTF
clone_527_H11	clonotype1355H11	1	TRB:CASSPRQDANTEVFF;TRA:CALGDQYSNNRIFF
clone_528_H11	clonotype1356H11	1	TRB:CASSPGQPNTLYF;TRA:CALGDLQQGTGSKLSF
clone_529_H11	clonotype1358H11	1	TRB:CASSLTGENTLYF;TRA:CAMRETPSNTNKVVF
clone_530_H11	clonotype1359H11	1	TRB:CASSLREGNTLYF;TRA:CALGDRGSNNRIFF
clone_531_H11	clonotype135H11	1	TRB:CASSQEQGDAETLYF;TRA:CAASSAGSFNKLTF;TRA:CATLNTGGLSGKLTF
clone_532_H11	clonotype1360H11	1	TRB:CASSLGLSYEQYF;TRA:CAMREGTSSGQKLVF
clone_533_H11	clonotype1361H11	1	TRB:CASRGRNYAEQFF;TRA:CAASVMNQGGSAKLIF
clone_534_H11	clonotype1362H11	1	TRB:CASSQQVNQDTQYF;TRA:CALGAYQGGRALIF
clone_535_H11	clonotype1363H11	1	TRB:CASSQVAEASDYTF;TRA:CALATNTGNYKYVF
clone_536_H11	clonotype1364H11	1	TRB:CTCSAGNQAPLF;TRA:CALGEGSGGSNYKLTF
clone_537_H11	clonotype1365H11	1	TRB:CTCARGDERLFF;TRA:CAASANTGANTGKLTF
clone_538_H11	clonotype1366H11	1	TRB:CASSQDGHSGNTLYF;TRA:CALGDQTQGGRALIF
clone_539_H11	clonotype1367H11	1	TRB:CASETGGAREQYF;TRA:CAMREGDNYAQGLTF
clone_540_H11	clonotype1368H11	1	TRB:CASSLGLSYEQYF;TRB:CASSQSGTGRSAEQFF;TRA:CAPGGQKLVF
clone_541_H11	clonotype1369H11	1	TRB:CASSARDWGGGAETLYF;TRB:CASSDARTGGKETLYF;TRA:CALASSSFSKLVF;TRA:CAMRENTEGADRLTF
clone_542_H11	clonotype1370H11	1	TRB:CASSRDNSGNTLYF;TRA:CAEGSWQLIF
clone_543_H11	clonotype1371H11	1	TRB:CASSQEGGSNERLFF;TRA:CAMRGPNTGANTGKLTF
clone_544_H11	clonotype1372H11	1	TRB:CASSQAGWDQNTLYF;TRA:CAMREGETGFASALTF
clone_545_H11	clonotype1373H11	1	TRB:CASSLGLGGQDTQYF;TRA:CAMREGPTQVVGQLTF
clone_546_H11	clonotype1375H11	1	TRB:CASSLGGGQAPLF;TRA:CAAGTGGYKVVF
clone_547_H11	clonotype1376H11	1	TRB:CASSFGTKDTQYF;TRA:CAATSSGQKLVF
clone_548_H11	clonotype1377H11	1	TRB:CASGDANRGRERLFF;TRB:CASSLRTYSDYTF;TRA:CAAGGNSNNRIFF
clone_549_H11	clonotype1378H11	1	TRB:CASSEGWGGPETLYF;TRA:CAARTGGNNKLTF
clone_550_H11	clonotype1379H11	1	TRB:CAWSSGLGGLAETLYF;TRA:CAASGSNNRIFF
clone_551_H11	clonotype1380H11	1	TRB:CASSSRQFTEVFF;TRA:CAAGRQGTGSKLSF
clone_552_H11	clonotype1381H11	1	TRB:CASSWDTNQAPLF;TRA:CAASGGSNAKLTF
clone_553_H11	clonotype1382H11	1	TRB:CASSRQSGNTLYF;TRA:CAASGAGGYKVVF
clone_554_H11	clonotype1383H11	1	TRB:CASSLPGEDTQYF;TRA:CAASVTGYQNFYF
clone_555_H11	clonotype1384H11	1	TRB:CASSLEDTQYF;TRB:CASTPGHQDTQYF;TRA:CAASEGADRLTF
clone_556_H11	clonotype1385H11	1	TRB:CASSGRDRISNERLFF;TRA:CAATHSGYNKLTF
clone_557_H11	clonotype1386H11	1	TRB:CTCSADEDTQYF;TRA:CAASHQGGRALIF
clone_558_H11	clonotype1387H11	1	TRB:CTCSAGGWEQYF;TRA:CAASAGSGGKLTL
clone_559_H11	clonotype1388H11	1	TRB:CASSQDSLGGGEQYF;TRA:CAASNTGYQNFYF
clone_560_H11	clonotype1389H11	1	TRB:CASSQPGLGGYEQYF;TRA:CAASRTGGNNKLTF
clone_561_H11	clonotype1392H11	1	TRB:CASSQDPNNERLFF;TRA:CAARITGNTGKLIF;TRA:CALSGTGNTGKLIF
clone_562_H11	clonotype1393H11	1	TRB:CASSAGLGGNTLYF;TRA:CAASDPSFSKLVF
clone_563_H11	clonotype1394H11	1	TRB:CASSLTGGQDTQYF;TRA:CAASWGGSGGKLTL
clone_564_H11	clonotype1395H11	1	TRB:CASRWGVQDTQYF;TRA:CAAYASSGSWQLIF
clone_565_H11	clonotype1396H11	1	TRB:CASSLSGNSPLYF;TRA:CAASGTGNTGKLIF
clone_566_H11	clonotype1397H11	1	TRB:CASSPGTGTEVFF;TRA:CAAMRGGSNAKLTF
clone_567_H11	clonotype1398H11	1	TRB:CASSFGAGNTLYF;TRA:CAARVITGNTGKLIF
clone_568_H11	clonotype1399H11	1	TRB:CASSDATGDNNQAPLF;TRA:CAASPANSAGNKLTF
clone_569_H11	clonotype1400H11	1	TRB:CASSQDPSQNTLYF;TRA:CAASGRGGSAKLIF
clone_570_H11	clonotype1401H11	1	TRB:CASSQDGTGDTQYF;TRA:CAASDSTGNYKYVF
clone_571_H11	clonotype1402H11	1	TRB:CASSRPDRAGTEVFF;TRA:CAASRASGGNYKPTF
clone_572_H11	clonotype1403H11	1	TRB:CASSQWGANSDYTF;TRA:CAASEGGTNAYKVIF
clone_573_H11	clonotype1404H11	1	TRB:CASSFDTKDTQYF;TRA:CALRNNNNAPRF
clone_574_H11	clonotype1405H11	1	TRB:CASSDRTGGSQNTLYF;TRA:CAARDRAYQGGRALIF
clone_575_H11	clonotype1406H11	1	TRB:CASSSEYNSPLYF;TRA:CALSDTNTNKVVF
clone_576_H11	clonotype1407H11	1	TRB:CASSLGLGGYEQYF;TRA:CALSDLYNQGKLIF
clone_577_H11	clonotype1408H11	1	TRB:CASSPTGVSEQYF;TRA:CALSALYGNAGAKLTF
clone_578_H11	clonotype1409H11	1	TRB:CASSLDLNSPLYF;TRA:CALSDQTGFASALTF
clone_579_H11	clonotype140H11	1	TRB:CASSLSPRATEVFF;TRA:CAAPDYSNNRLTL;TRA:CALESGGNNKLTF
clone_580_H11	clonotype1410H11	1	TRA:CAASKNSGTYQRF
clone_581_H11	clonotype1411H11	1	TRA:CAVSMGAGNTGKLIF
clone_582_H11	clonotype1412H11	1	TRB:CASSPSAETLYF
clone_583_H11	clonotype1413H11	1	TRB:CASSRTGEEVFF
clone_584_H11	clonotype1414H11	1	TRB:CASSMDRGEQYF
clone_585_H11	clonotype1415H11	1	TRB:CASSMDRGEQYF
clone_586_H11	clonotype1416H11	1	TRB:CASSMDRGEQYF
clone_587_H11	clonotype1417H11	1	TRB:CASSLQENTLYF
clone_588_H11	clonotype1418H11	1	TRB:CASGTGEDTQYF
clone_589_H11	clonotype1419H11	1	TRB:CASGTGRDTQYF
clone_590_H11	clonotype1420H11	1	TRA:CVLGASSGSWQLIF
clone_591_H11	clonotype1421H11	1	TRA:CSASKTGGYKVVF
clone_592_H11	clonotype1422H11	1	TRA:CSASKTGGYKVVF
clone_593_H11	clonotype1423H11	1	TRA:CSASKTGGYKVVF
clone_594_H11	clonotype1424H11	1	TRA:CAVRGYNQGKLIF
clone_595_H11	clonotype1425H11	1	TRA:CAVSEAGGYKVVF
clone_596_H11	clonotype1426H11	1	TRA:CAASMGSNNRIFF
clone_597_H11	clonotype1427H11	1	TRB:CASSLSDWGKDTQYF
clone_598_H11	clonotype1428H11	1	TRB:CASSQELGKNTGQLYF
clone_599_H11	clonotype1429H11	1	TRB:CASSQEGTGITGQLYF
clone_600_H11	clonotype1430H11	1	TRB:CASSQEGTGITGQLYF
clone_601_H11	clonotype1431H11	1	TRB:CASSQEGRTGDERLFF
clone_602_H11	clonotype1433H11	1	TRB:CASSQEGRTGDERLFF
clone_603_H11	clonotype1434H11	1	TRB:CASSQEGRTGDERLFF
clone_604_H11	clonotype1435H11	1	TRB:CASSQEGRTGDERLFF
clone_605_H11	clonotype1436H11	1	TRB:CASSQEGRTGDERLFF
clone_606_H11	clonotype1437H11	1	TRB:CASSQEGDSYNSPLYF
clone_607_H11	clonotype1439H11	1	TRB:CASSQEGRTGNERLFF
clone_608_H11	clonotype1440H11	1	TRB:CASSQDAGGNTGQLYF
clone_609_H11	clonotype1441H11	1	TRB:CASSQDGRTGPETLYF
clone_610_H11	clonotype1442H11	1	TRB:CASSQDGRTGPETLYF
clone_611_H11	clonotype1443H11	1	TRB:CASSQDGRTGPETLYF
clone_612_H11	clonotype1444H11	1	TRB:CASSQDGRTGPETLYF
clone_613_H11	clonotype1445H11	1	TRB:CASSQDLGGFQDTQYF
clone_614_H11	clonotype1447H11	1	TRB:CASSPHWGGGAETLYF
clone_615_H11	clonotype1448H11	1	TRB:CASSPQDWGSAETLYF
clone_616_H11	clonotype1449H11	1	TRA:CAVSLNTGNYKYVF
clone_617_H11	clonotype1450H11	1	TRA:CAVSTGANTGKLTF
clone_618_H11	clonotype1451H11	1	TRA:CALSMGGSNAKLTF
clone_619_H11	clonotype1453H11	1	TRA:CALSMGGSNAKLTF
clone_620_H11	clonotype1454H11	1	TRA:CALSASSGSWQLIF
clone_621_H11	clonotype1455H11	1	TRB:CAWSLGTGGAGTGQLYF
clone_622_H11	clonotype1456H11	1	TRA:CALSHNYAQGLTF
clone_623_H11	clonotype1458H11	1	TRA:CALSDDSNNRIFF
clone_624_H11	clonotype1459H11	1	TRA:CALALTNAYKVIF
clone_625_H11	clonotype1460H11	1	TRA:CALGGTNAYKVIF
clone_626_H11	clonotype1461H11	1	TRB:CASRRDRANSDYTF
clone_627_H11	clonotype1462H11	1	TRB:CASSPLGGYAEQFF
clone_628_H11	clonotype1463H11	1	TRB:CASSPTPSQNTLYF
clone_629_H11	clonotype1464H11	1	TRB:CASSPTPSQNTLYF
clone_630_H11	clonotype1465H11	1	TRB:CASSPDWGENTLYF
clone_631_H11	clonotype1466H11	1	TRB:CASSPDWGGTEQFF
clone_632_H11	clonotype1467H11	1	TRB:CASSRDWGSETLYF
clone_633_H11	clonotype1468H11	1	TRB:CASSSLGNTGQLYF
clone_634_H11	clonotype1469H11	1	TRB:CASSLRQNYAEQFF
clone_635_H11	clonotype1470H11	1	TRB:CASSLALGQYEQYF
clone_636_H11	clonotype1471H11	1	TRB:CASSLAGTGNTLYF
clone_637_H11	clonotype1472H11	1	TRB:CASSLGRNYAEQFF
clone_638_H11	clonotype1473H11	1	TRB:CASSLGAGGYEQYF
clone_639_H11	clonotype1474H11	1	TRB:CASSLGISNERLFF
clone_640_H11	clonotype1476H11	1	TRB:CASSFRDRGSDYTF
clone_641_H11	clonotype1477H11	1	TRB:CASSFGGAQDTQYF
clone_642_H11	clonotype1479H11	1	TRB:CASSLGPSAETLYF
clone_643_H11	clonotype1480H11	1	TRB:CASSFDSPNTEVFF
clone_644_H11	clonotype1481H11	1	TRB:CASSFEGGGNTLYF
clone_645_H11	clonotype1482H11	1	TRB:CASSFWGNTGQLYF
clone_646_H11	clonotype1483H11	1	TRB:CASSRTGGDTEVFF
clone_647_H11	clonotype1484H11	1	TRB:CASRRLGFNQDTQYF
clone_648_H11	clonotype1485H11	1	TRB:CASSRDMGNYAEQFF
clone_649_H11	clonotype1487H11	1	TRB:CASSTQGSQNTLYF
clone_650_H11	clonotype1488H11	1	TRB:CASSQPHRGYEQYF
clone_651_H11	clonotype1490H11	1	TRB:CASSVGWGGYEQYF
clone_652_H11	clonotype1491H11	1	TRB:CASSWDSHNERLFF
clone_653_H11	clonotype1492H11	1	TRB:CASSLKLGGPEQYF
clone_654_H11	clonotype1493H11	1	TRB:CASSLQGQNTEVFF
clone_655_H11	clonotype1494H11	1	TRB:CASSLEQANTEVFF
clone_656_H11	clonotype1495H11	1	TRB:CASSLEGSNTEVFF
clone_657_H11	clonotype1496H11	1	TRB:CASSLEGSNTEVFF
clone_658_H11	clonotype1497H11	1	TRB:CASSLDGRGYEQYF
clone_659_H11	clonotype1498H11	1	TRB:CASSLANSGNTLYF
clone_660_H11	clonotype1499H11	1	TRB:CASSLGQGGAEQFF
clone_661_H11	clonotype1500H11	1	TRB:CASSLGGTNERLFF
clone_662_H11	clonotype1502H11	1	TRB:CASSFGISNERLFF
clone_663_H11	clonotype1504H11	1	TRB:CASSRTGGAETLYF
clone_664_H11	clonotype1505H11	1	TRB:CASSGFWGSYEQYF
clone_665_H11	clonotype1506H11	1	TRB:CASRRDRRNTEVFF
clone_666_H11	clonotype1507H11	1	TRB:CASSTGGGQNTLYF
clone_667_H11	clonotype1508H11	1	TRB:CASSPPGRGNTLYF
clone_668_H11	clonotype1510H11	1	TRB:CASSPTVNQDTQYF
clone_669_H11	clonotype1511H11	1	TRB:CASSRTGYNSPLYF
clone_670_H11	clonotype1512H11	1	TRB:CASSLGGKGSPLYF
clone_671_H11	clonotype1514H11	1	TRB:CASSLQGTNSDYTF
clone_672_H11	clonotype1516H11	1	TRB:CASSLGQNYAEQFF
clone_673_H11	clonotype1517H11	1	TRB:CASSLPGARSDYTF
clone_674_H11	clonotype1519H11	1	TRB:CASSRTGGEDTQYF
clone_675_H11	clonotype1520H11	1	TRB:CASSLTGGTYEQYF
clone_676_H11	clonotype1521H11	1	TRB:CASSLGTNTGQLYF
clone_677_H11	clonotype1522H11	1	TRB:CASSLWVGQNTLYF
clone_678_H11	clonotype1523H11	1	TRB:CASSFYFNTGQLYF
clone_679_H11	clonotype1524H11	1	TRB:CASSFWNSNERLFF
clone_680_H11	clonotype1525H11	1	TRB:CASSFWGEGAEQFF
clone_681_H11	clonotype1526H11	1	TRB:CASSQARLGYEQYF
clone_682_H11	clonotype1527H11	1	TRB:CASRPGQANTEVFF
clone_683_H11	clonotype1528H11	1	TRB:CASSRTGGQDTQYF
clone_684_H11	clonotype1529H11	1	TRB:CASSSQGTNTEVFF
clone_685_H11	clonotype1530H11	1	TRB:CASSLVGGQDTQYF
clone_686_H11	clonotype1531H11	1	TRB:CASRGLGPSSQNTLYF
clone_687_H11	clonotype1532H11	1	TRB:CASGDSGGANTGQLYF
clone_688_H11	clonotype1533H11	1	TRB:CASGDATGGNYAEQFF
clone_689_H11	clonotype1534H11	1	TRB:CASGDAGGHSQNTLYF
clone_690_H11	clonotype1535H11	1	TRB:CASSQDWGVENTLYF
clone_691_H11	clonotype1538H11	1	TRB:CASSQTGASAETLYF
clone_692_H11	clonotype1540H11	1	TRB:CASSSRDRGYAEQFF
clone_693_H11	clonotype1541H11	1	TRB:CASSSSGTSAETLYF
clone_694_H11	clonotype1542H11	1	TRB:CASSSSGTSAETLYF
clone_695_H11	clonotype1543H11	1	TRB:CASSSSGTSAETLYF
clone_696_H11	clonotype1545H11	1	TRB:CASSKTGRSAETLYF
clone_697_H11	clonotype1546H11	1	TRB:CASSKTGRSAETLYF
clone_698_H11	clonotype1547H11	1	TRB:CTCSKQSNERLFF
clone_699_H11	clonotype1548H11	1	TRB:CTCSADRNSDYTF
clone_700_H11	clonotype1549H11	1	TRB:CTCSADRGYEQYF
clone_701_H11	clonotype1550H11	1	TRB:CTCSAGDTGQLYF
clone_702_H11	clonotype1551H11	1	TRB:CTCSAGGLTEVFF
clone_703_H11	clonotype1552H11	1	TRB:CTCSASTNTEVFF
clone_704_H11	clonotype1553H11	1	TRB:CTCSADRADTQYF
clone_705_H11	clonotype1554H11	1	TRB:CTCAGQPNSDYTF
clone_706_H11	clonotype1555H11	1	TRB:CASSLNGGVGNTLYF;TRB:CASSQDGGPNTEVFF;TRA:CAVPYQGGRALIF;TRA:CAYNNRIFF
clone_707_H11	clonotype1556H11	1	TRB:CASSSGLGGSYEQYF;TRA:CAIQGKLIF
clone_708_H11	clonotype1557H11	1	TRB:CASSPRTGGYEQYF;TRA:CAASVNNNAPRF;TRA:CAIDHNAPRF
clone_709_H11	clonotype1559H11	1	TRB:CASSPDSSGNTLYF;TRA:CAFNMGYKLTF
clone_710_H11	clonotype1560H11	1	TRB:CTCSGLGGLEQYF;TRA:CATDVHTGKLTF
clone_711_H11	clonotype1561H11	1	TRB:CASSLGVNNQAPLF;TRA:CAAVNNNNAPRF
clone_712_H11	clonotype1562H11	1	TRB:CASSRAGTGGYEQYF;TRA:CIVTDRNSGTYQRF
clone_713_H11	clonotype1563H11	1	TRB:CASSSQGNQNTLYF;TRA:CAPSGSFNKLTF
clone_714_H11	clonotype1564H11	1	TRB:CASSSQGRNSDYTF;TRA:CILRDRYGNEKITF
clone_715_H11	clonotype1565H11	1	TRB:CASSLAGTGNTLYF;TRA:CILRNQGGSAKLIF
clone_716_H11	clonotype1566H11	1	TRB:CASSSGLFQDTQYF;TRA:CAAGSNYNVLYF
clone_717_H11	clonotype1567H11	1	TRB:CASSLGTDNERLFF;TRA:CAAEGSNYQLIW
clone_718_H11	clonotype1568H11	1	TRB:CASSQPGQNYAEQFF;TRA:CALDNNAPRF
clone_719_H11	clonotype1569H11	1	TRB:CTCSADRENTLYF;TRA:CAAAYNQGKLIF
clone_720_H11	clonotype1572H11	1	TRB:CASMGGDSPLYF;TRA:CAAEDTNAYKVIF
clone_721_H11	clonotype1573H11	1	TRB:CASSPGLGGDTQYF;TRA:CAAEAVSNYQLIW
clone_722_H11	clonotype1574H11	1	TRB:CASSLLGGEAEQFF;TRA:CAVNNNNAPRF
clone_723_H11	clonotype1575H11	1	TRB:CASSSGLGVYEQYF;TRA:CAAPTASLGKLQF
clone_724_H11	clonotype1576H11	1	TRB:CASSYGTSQNTLYF;TRA:CILRVEEGTGSKLSF
clone_725_H11	clonotype1577H11	1	TRB:CASSFRGGAETLYF;TRA:CAAPPGGNYKPTF
clone_726_H11	clonotype1578H11	1	TRB:CASSQEGQGSTEVFF;TRA:CAFGDNSKLIW
clone_727_H11	clonotype1579H11	1	TRB:CTCSADRDTEQYF;TRA:CAADLTGNTGKLIF;TRA:CIVTAYNNAGAKLTF
clone_728_H11	clonotype157H11	1	TRB:CASGDASWGGGQNTLYF;TRA:CAAYQGGSAKLIF
clone_729_H11	clonotype1580H11	1	TRB:CTCSADGAETLYF;TRA:CALAYQGGRALIF
clone_730_H11	clonotype1581H11	1	TRB:CTCSADLGAALYF;TRA:CAAEKSNYNVLYF
clone_731_H11	clonotype1582H11	1	TRB:CTCSAGDSYEQYF;TRA:CAMDRTGGYKVVF
clone_732_H11	clonotype1583H11	1	TRB:CASSPRGTEVFF;TRA:CAVSSGSWQLIF
clone_733_H11	clonotype1584H11	1	TRB:CASSFGGQSNTEVFF;TRA:CADGSSGNKLIF
clone_734_H11	clonotype1585H11	1	TRB:CASSQEWGHSGNTLYF;TRA:CAASWDRIFF
clone_735_H11	clonotype1586H11	1	TRB:CASSRGQGNSGNTLYF;TRA:CALVVTGSGGKLTL
clone_736_H11	clonotype1587H11	1	TRB:CASSRGTGGSAETLYF;TRA:CAVEAAGNTGKLIF
clone_737_H11	clonotype1588H11	1	TRB:CASSATGDYAEQFF;TRA:CAVTSGSWQLIF
clone_738_H11	clonotype1589H11	1	TRB:CASSSDRGGTEVFF;TRA:CALSRALIF
clone_739_H11	clonotype1590H11	1	TRB:CASSSEVSNERLFF;TRA:CAAEAYQGGRALIF
clone_740_H11	clonotype1591H11	1	TRB:CASSSDWAQDTQYF;TRA:CAAEADNYAQGLTF
clone_741_H11	clonotype1592H11	1	TRB:CASSLEGGAYEQYF;TRA:CILRVGQQGTGSKLSF
clone_742_H11	clonotype1593H11	1	TRB:CASSLTGGNTEVFF;TRA:CALGNVGDNSKLIW;TRA:CAVSAPNNNAPRF
clone_743_H11	clonotype1596H11	1	TRB:CASSPTANTGQLYF;TRA:CAAEAGTGYQNFYF
clone_744_H11	clonotype1598H11	1	TRB:CASSPTINTGQLYF;TRA:CAAANSGTYQRF
clone_745_H11	clonotype1599H11	1	TRB:CASSRTNSNSDYTF;TRA:CAADQGGRALIF
clone_746_H11	clonotype1600H11	1	TRB:CASSLGGSGNTLYF;TRA:CAVSAGNNRIFF
clone_747_H11	clonotype1601H11	1	TRB:CASSFDWGGYEQYF;TRA:CAVSGSNNRIFF
clone_748_H11	clonotype1602H11	1	TRB:CASGDALGVNQDTQYF;TRA:CAASARGSAGNKLTF;TRA:CAMAHDSGYNKLTF
clone_749_H11	clonotype1603H11	1	TRB:CASSPPGQANTEVFF;TRA:CAIETSGGNYKPTF
clone_750_H11	clonotype1604H11	1	TRB:CASSQTGASAETLYF;TRA:CAAEAMSNYNVLYF
clone_751_H11	clonotype1605H11	1	TRB:CASSRTGRSAETLYF;TRA:CAAEAMSNYNVLYF
clone_752_H11	clonotype1606H11	1	TRB:CSSSQGGDQDTQYF;TRA:CANRNMGYKLTF
clone_753_H11	clonotype1607H11	1	TRB:CTCSAGLQDTQYF;TRA:CAGGTNAYKVIF
clone_754_H11	clonotype1609H11	1	TRB:CASSPSSYEQYF;TRA:CAVRDTGNYKYVF
clone_755_H11	clonotype1610H11	1	TRB:CASLGDWGNYAEQFF;TRA:CVWGNMGYKLTF
clone_756_H11	clonotype1611H11	1	TRB:CASRWRGANTEVFF;TRB:CASSQKGQGADERLFF;TRA:CAASDYSNNRLTL;TRA:CAASMRNSGTYQRF
clone_757_H11	clonotype1612H11	1	TRB:CASSLDWGQNTGQLYF;TRB:CAWSPDRGNSYNSPLYF;TRA:CALGGYKVVF
clone_758_H11	clonotype1613H11	1	TRB:CASSPGLNTGQLYF;TRA:CAVSENSGTYQRF
clone_759_H11	clonotype1614H11	1	TRB:CASSSGTGGYEQYF;TRA:CAVMNTGYQNFYF
clone_760_H11	clonotype1615H11	1	TRB:CASSLEGGQNTLYF;TRA:CAVSAGNNNAPRF
clone_761_H11	clonotype1616H11	1	TRB:CASSLGDSSYEQYF;TRA:CAASDNAGAKLTF
clone_762_H11	clonotype1617H11	1	TRB:CASSLQSSAETLYF;TRA:CALGDRGNNRIFF;TRA:CAVGNYNQGKLIF
clone_763_H11	clonotype1618H11	1	TRB:CASSLGDWGYEQYF;TRA:CAIDMNNNAGAKLTF
clone_764_H11	clonotype1619H11	1	TRB:CASSPDWGGAETLYF;TRA:CAVSRNYAQGLTF
clone_765_H11	clonotype161H11	1	TRB:CGARARVGSDYTF;TRA:CAVSAGNYKYVF
clone_766_H11	clonotype1620H11	1	TRB:CASSLTVSNERLFF;TRA:CAAGNSGGSNAKLTF
clone_767_H11	clonotype1621H11	1	TRB:CASRGQGGYAEQFF;TRA:CAAEAYTEGADRLTF
clone_768_H11	clonotype1622H11	1	TRB:CASSLRTGGARQYF;TRA:CAAESPNSAGNKLTF
clone_769_H11	clonotype1623H11	1	TRB:CASSFAGGEDTQYF;TRA:CALGTGGYKVVF;TRA:CALSDGTGGYKVVF
clone_770_H11	clonotype1625H11	1	TRB:CASSPSPSGNTLYF;TRA:CAAELTSGGNYKPTF
clone_771_H11	clonotype1626H11	1	TRB:CASSSTGGSYEQYF;TRA:CAVSTAGGYKVVF
clone_772_H11	clonotype1627H11	1	TRB:CASSLGDSSYEQYF;TRA:CAVRSTNAYKVIF
clone_773_H11	clonotype1628H11	1	TRB:CASSQDRGAGAEQFF;TRA:CALSVTNTGKLTF
clone_774_H11	clonotype1629H11	1	TRB:CASSQDLGGSYEQYF;TRA:CAVSANTNKVVF
clone_775_H11	clonotype1630H11	1	TRB:CASSPGTGGENTLYF;TRA:CALRANSGTYQRF
clone_776_H11	clonotype1631H11	1	TRB:CASSLGTTSAETLYF;TRA:CAGASSGSWQLIF
clone_777_H11	clonotype1632H11	1	TRB:CSSSHSDRAYEQYF;TRA:CAAEILSGSFNKLTF
clone_778_H11	clonotype1633H11	1	TRB:CTCSAYWGETLYF;TRA:CAAGEGQGTGSKLSF;TRA:CAVRFTGYQNFYF
clone_779_H11	clonotype1634H11	1	TRB:CTCSAAPQGPVFF;TRA:CAASEHDNNAPRF
clone_780_H11	clonotype1635H11	1	TRB:CTCSAGHNQAPLF;TRA:CAARGNSNNRIFF
clone_781_H11	clonotype1636H11	1	TRB:CASSRLGYNYAEQFF;TRA:CAASEGGRALIF
clone_782_H11	clonotype1637H11	1	TRB:CASSASGNYAEQFF;TRA:CAVSMPGGYKVVF
clone_783_H11	clonotype1638H11	1	TRB:CASSGQGRGDTQYF;TRA:CALGNYAQGLTF
clone_784_H11	clonotype1639H11	1	TRB:CASSLKGASTEVFF;TRA:CATDASTNAYKVIF
clone_785_H11	clonotype1640H11	1	TRB:CASSLAGGANTQYF;TRA:CAVSMPGGSAKLIF
clone_786_H11	clonotype1641H11	1	TRB:CASSLGRDYAEQFF;TRA:CVLGPNTNTGKLTF
clone_787_H11	clonotype1642H11	1	TRB:CASSLVRDTGQLYF;TRA:CALERGLSGSFNKLTF;TRA:CALRDRTGGYKVVF
clone_788_H11	clonotype1643H11	1	TRB:CASSLTGGAQEQYF;TRA:CAVSPTGSGGKLTL
clone_789_H11	clonotype1645H11	1	TRB:CASSSLGGSSYEQYF;TRA:CAVRESSGSWQLIF
clone_790_H11	clonotype1646H11	1	TRB:CASSLYWGVYAEQFF;TRB:CASSNRGANTEVFF;TRA:CVLGDPNTNKVVF
clone_791_H11	clonotype1647H11	1	TRB:CASSQGTGGVEQYF;TRA:CVLSGTGGYKVVF
clone_792_H11	clonotype1648H11	1	TRB:CASSPGTTNERLFF;TRA:CVLASSNTNKVVF
clone_793_H11	clonotype1649H11	1	TRB:CASSPDWGRYEQYF;TRA:CALPGNTGKLIF
clone_794_H11	clonotype1650H11	1	TRB:CASSLEGSNTEVFF;TRA:CAVSHNTNTGKLTF
clone_795_H11	clonotype1651H11	1	TRB:CASSLGRGQAEQFF;TRA:CAASGMSNYNVLYF
clone_796_H11	clonotype1652H11	1	TRB:CASGRESGNQAPLF;TRB:CASSLGWGVAEQFF;TRA:CALNQGGRALIF;TRA:CALSDRDQGGRALIF
clone_797_H11	clonotype1653H11	1	TRB:CASSLTGDYAEQFF;TRA:CAMERRRGANTGKLTF
clone_798_H11	clonotype1654H11	1	TRB:CASSTATNTGQLYF;TRA:CAMSEWSNYNVLYF
clone_799_H11	clonotype1656H11	1	TRB:CASSLTGMNTEVFF;TRA:CALSMDSNYQLIW
clone_800_H11	clonotype1658H11	1	TRB:CASSLTGTDYEQYF;TRA:CSASTNTNKVVF
clone_801_H11	clonotype1659H11	1	TRB:CASSLRGQNTEVFF;TRA:CAVSASSGSWQLIF
clone_802_H11	clonotype1660H11	1	TRB:CASSRTHSGNTLYF;TRA:CACNYGNEKITF
clone_803_H11	clonotype1661H11	1	TRB:CASSLTFNQDTQYF;TRA:CAVSMTGYNKLTF
clone_804_H11	clonotype1662H11	1	TRB:CASSFAGTNTEVFF;TRA:CAMRESSGSWQLIF
clone_805_H11	clonotype1663H11	1	TRB:CASSFGRSAETLYF;TRA:CAASEGADRLTF
clone_806_H11	clonotype1664H11	1	TRB:CASSPTSSGNTLYF;TRA:CAVKGSSGSWQLIF
clone_807_H11	clonotype1665H11	1	TRB:CASSLLGGQNTLYF;TRA:CAASEGYQNFYF
clone_808_H11	clonotype1666H11	1	TRB:CASSQTQGNYAEQFF;TRA:CALSDSLGNYQLIW
clone_809_H11	clonotype1667H11	1	TRB:CASSQEGTTNSDYTF;TRA:CAVSATTNTGKLTF
clone_810_H11	clonotype1668H11	1	TRB:CASSQDGRSNTEVFF;TRA:CALGGGNNRIFF
clone_811_H11	clonotype1671H11	1	TRB:CASSLLGGREDTQYF;TRB:CASSPSGEGNSDYTF;TRA:CAVSGSTGNYKYVF
clone_812_H11	clonotype1672H11	1	TRB:CASSRDWGNQDTQYF;TRA:CAVSIWNYAQGLTF
clone_813_H11	clonotype1673H11	1	TRB:CASSSRTGSSYEQYF;TRA:CAASEHDSNYQLIW
clone_814_H11	clonotype1674H11	1	TRB:CTCSGGDYAEQFF;TRA:CAAEADRGSALGRLHF
clone_815_H11	clonotype1675H11	1	TRB:CASSISAETLYF;TRA:CALRNSNNRIFF
clone_816_H11	clonotype1676H11	1	TRB:CASSMEGGTLYF;TRA:CAPFGSFNKLTF;TRA:CATVLDRGSALGRLHF
clone_817_H11	clonotype1677H11	1	TRB:CASSISGNTLYF;TRA:CAVDLPGTGSNRLTF
clone_818_H11	clonotype1678H11	1	TRB:CASSHDRANTGQLYF;TRA:CAVRYQGGRALIF
clone_819_H11	clonotype1679H11	1	TRB:CASSSGTGGNSDYTF;TRA:CAVSMDNYAQGLTF
clone_820_H11	clonotype1680H11	1	TRB:CASSWGTVSNERLFF;TRA:CVVGLSNYNVLYF
clone_821_H11	clonotype1681H11	1	TRB:CASSLFQGANSDYTF;TRA:CAMSLTSGGNYKPTF
clone_822_H11	clonotype1682H11	1	TRB:CASSQDGRGAAETLYF;TRA:CVLGSNYNQGKLIF
clone_823_H11	clonotype1683H11	1	TRB:CASSQETGGSAETLYF;TRA:CAVKMSNYNVLYF
clone_824_H11	clonotype1685H11	1	TRB:CASKPGQGNTGQLYF;TRB:CASSPWDSNSDYTF;TRA:CAVSMLSGSFNKLTF
clone_825_H11	clonotype1686H11	1	TRB:CASSLLGNQDTQYF;TRA:CAASERNYNQGKLIF
clone_826_H11	clonotype1687H11	1	TRB:CASSLEQGDTEVFF;TRA:CALSDSNNRIFF
clone_827_H11	clonotype1688H11	1	TRB:CASSLGGYNERLFF;TRA:CVLSAGASLGKLQF
clone_828_H11	clonotype1690H11	1	TRB:CASSRVGGGAETLYF;TRA:CALEGGTNTGKLTF
clone_829_H11	clonotype1691H11	1	TRB:CASSRGDSNERLFF;TRA:CVLSANYNQGKLIF
clone_830_H11	clonotype1692H11	1	TRB:CASSLRLNQDTQYF;TRA:CALYNTNTGKLTF
clone_831_H11	clonotype1693H11	1	TRB:CASSLDVGGYEQYF;TRA:CAARYQGGRALIF
clone_832_H11	clonotype1694H11	1	TRB:CASSLDRTGYEQYF;TRA:CVLSRTGNTGKLIF
clone_833_H11	clonotype1695H11	1	TRB:CASSLGTGGYEQYF;TRA:CALGDTGYQNFYF
clone_834_H11	clonotype1696H11	1	TRB:CASSLGGRNTEVFF;TRA:CAARSSSFSKLVF
clone_835_H11	clonotype1697H11	1	TRB:CASSRDSYNSPLYF;TRA:CAVSEAGNYKYVF
clone_836_H11	clonotype1698H11	1	TRB:CASSSTGVGNTLYF;TRA:CAASNTNTNKVVF
clone_837_H11	clonotype1699H11	1	TRB:CASSFRDSYAEQFF;TRB:CASSMGAHEQYF;TRA:CAVSMQQGTGSKLSF
clone_838_H11	clonotype1700H11	1	TRB:CASSFSGGGSDYTF;TRA:CAVSGENYNQGKLIF
clone_839_H11	clonotype1701H11	1	TRB:CASSGTGGYAEQFF;TRA:CAASSRGGYKVVF
clone_840_H11	clonotype1703H11	1	TRB:CASSLEGVPYEQYF;TRA:CALGPNAGAKLTF;TRA:CALSGSSNTNKVVF
clone_841_H11	clonotype1704H11	1	TRB:CASSTGTGGNQDTQYF;TRA:CASTGANTGKLTF
clone_842_H11	clonotype1705H11	1	TRB:CASGDVGLGGYAEQFF;TRA:CALGDQTGGYKVVF
clone_843_H11	clonotype1706H11	1	TRB:CASSPWDRANSDYTF;TRA:CALRSGSWQLIF
clone_844_H11	clonotype1707H11	1	TRB:CTCSAGGNYEQYF;TRA:CVLGDGGSALGRLHF
clone_845_H11	clonotype1708H11	1	TRB:CASTAWGYEQYF;TRA:CAASEPYGSSGNKLIF
clone_846_H11	clonotype1709H11	1	TRB:CASSLTGTNTGQLYF;TRA:CAVRRTGNTGKLIF
clone_847_H11	clonotype170H11	1	TRB:CASSSGGDTEVFF;TRA:CALERNAGAKLTF
clone_848_H11	clonotype1710H11	1	TRB:CASSLPTGASYEQYF;TRA:CAVSGYTGNYKYVF
clone_849_H11	clonotype1711H11	1	TRB:CASSQDWGINQDTQYF;TRA:CALSNYNQGKLIF
clone_850_H11	clonotype1712H11	1	TRB:CASSQDIRGFYAEQFF;TRA:CALDNNAGAKLTF
clone_851_H11	clonotype1714H11	1	TRB:CASSQGWGGGTGQLYF;TRA:CAASRGTNTGKLTF
clone_852_H11	clonotype1715H11	1	TRB:CASSSGISNERLFF;TRA:CAASATGGNNKLTF
clone_853_H11	clonotype1716H11	1	TRB:CASSPSGGYAEQFF;TRA:CAMSYYGNEKITF
clone_854_H11	clonotype1718H11	1	TRB:CASSSTGAQDTQYF;TRA:CALSASSGSWQLIF
clone_855_H11	clonotype1719H11	1	TRB:CASSFRKGNSDYTF;TRA:CAASIRGSALGRLHF;TRA:CALGAMSNYNVLYF
clone_856_H11	clonotype1720H11	1	TRB:CASSFGTDNERLFF;TRA:CAVSLLPGTGSNRLTF
clone_857_H11	clonotype1722H11	1	TRB:CASSLSGANTEVFF;TRA:CALGSSGSWQLIF
clone_858_H11	clonotype1723H11	1	TRB:CASSSGTANSDYTF;TRA:CALEGPGANTGKLTF
clone_859_H11	clonotype1724H11	1	TRB:CASSPQGWAETLYF;TRA:CALVRDYANKMIF
clone_860_H11	clonotype1725H11	1	TRB:CASSPWGGQNTLYF;TRA:CALGEDNYAQGLTF
clone_861_H11	clonotype1726H11	1	TRB:CASSLGQGGNTLYF;TRA:CALSDQRTGNTGKLIF
clone_862_H11	clonotype1727H11	1	TRB:CASSLGQGMDEQYF;TRA:CALRGWSNNRIFF
clone_863_H11	clonotype1728H11	1	TRB:CASGDGTGGRKDTQYF;TRB:CTCSARGGNTEVFF;TRA:CAAVTNSAGNKLTF
clone_864_H11	clonotype1729H11	1	TRB:CASSQGGGANERLFF;TRA:CAFNQGGSAKLIF
clone_865_H11	clonotype1731H11	1	TRB:CTCSAGNTGQLYF;TRA:CALGENNAGAKLTF
clone_866_H11	clonotype1732H11	1	TRB:CASSMDRGEQYF;TRA:CAVSSSNTGNYKYVF
clone_867_H11	clonotype1733H11	1	TRB:CASGDRLNTLYF;TRA:CALSDRDSGTYQRF
clone_868_H11	clonotype1734H11	1	TRB:CASSAPGQLYAEQFF;TRA:CALSEIGTNSAGNKLTF
clone_869_H11	clonotype1736H11	1	TRB:CASSRDWDSYEQYF;TRA:CAMRGTEGADRLTF
clone_870_H11	clonotype1738H11	1	TRB:CASSSGTGSYEQYF;TRA:CAMREGKNNNAPRF
clone_871_H11	clonotype1739H11	1	TRB:CASSSTGANERLFF;TRA:CAAVGGTQVVGQLTF
clone_872_H11	clonotype1740H11	1	TRB:CASRDWGTSQNTLYF;TRA:CALGMSNYNVLYF
clone_873_H11	clonotype1741H11	1	TRB:CASSFDWGQNTLYF;TRA:CALSDGTGNYKYVF
clone_874_H11	clonotype1742H11	1	TRB:CASSFGTGNQAPLF;TRA:CAASAEMDSNYQLIW
clone_875_H11	clonotype1743H11	1	TRB:CASSLDSANTEVFF;TRA:CALVAGTGGYKVVF
clone_876_H11	clonotype1744H11	1	TRB:CASGEDRGRGQNTLYF;TRA:CALVEGNMGYKLTF
clone_877_H11	clonotype1745H11	1	TRB:CASSEPGTGGSNERLFF;TRA:CALSYSSSSFSKLVF
clone_878_H11	clonotype1747H11	1	TRB:CASSFDRAGNQAPLF;TRA:CALGHNSNNRIFF
clone_879_H11	clonotype1748H11	1	TRB:CSSSPQASNERLFF;TRA:CALAANSGTYQRF
clone_880_H11	clonotype1749H11	1	TRB:CASSIGGNEQYF;TRA:CALSELSSGSWQLIF
clone_881_H11	clonotype174H11	1	TRB:CASSQSGGQDTQYF;TRA:CALSDDSNNRIFF
clone_882_H11	clonotype1750H11	1	TRB:CASSSDRINTEVFF;TRA:CALVRVNSAGNKLTF
clone_883_H11	clonotype1751H11	1	TRB:CASSLIRGQDTQYF;TRB:CASSPPGQGGKAPLF;TRA:CAASDYSNNRLTL;TRA:CAVSGHNVGDNSKLIW
clone_884_H11	clonotype1752H11	1	TRB:CASSLSAGNERLFF;TRA:CALSELMDSNYQLIW
clone_885_H11	clonotype1754H11	1	TRB:CASSPDWGGNYAEQFF;TRA:CALSDRDQGGSAKLIF
clone_886_H11	clonotype1755H11	1	TRB:CASSEWTGGGNYAEQFF;TRA:CALSDMNYNQGKLIF
clone_887_H11	clonotype1756H11	1	TRB:CASSPPGQGGKAPLF;TRA:CAVSGHNVGDNSKLIW
clone_888_H11	clonotype1757H11	1	TRB:CASSRDWGYAEQFF;TRA:CALGDPGFASALTF
clone_889_H11	clonotype1758H11	1	TRB:CASSQEGQGAETLYF;TRA:CAAMNNRIFF
clone_890_H11	clonotype1759H11	1	TRB:CASSRDWGAYEQYF;TRA:CAMREGRGNMGYKLTF
clone_891_H11	clonotype1760H11	1	TRB:CASSLSINQDTQYF;TRA:CAASANYNVLYF
clone_892_H11	clonotype1761H11	1	TRB:CASRQGLSNERLFF;TRB:CASSIARGDAEQFF;TRA:CAARTGGNNKLTF
clone_893_H11	clonotype1762H11	1	TRB:CASSQDLLGPGNTLYF;TRA:CAAPSSNTNKVVF
clone_894_H11	clonotype1763H11	1	TRB:CASSLEQGNTEVFF;TRA:CAATSNYNVLYF
clone_895_H11	clonotype1764H11	1	TRB:CASSLTGNSYEQYF;TRA:CAASGPSNYQLIW
clone_896_H11	clonotype1765H11	1	TRB:CASSLQNSGNTLYF;TRA:CAASAGNNNAPRF
clone_897_H11	clonotype1766H11	1	TRB:CASSTVGAPNERLFF;TRA:CAMREGNSGGSNAKLTF
clone_898_H11	clonotype1767H11	1	TRB:CASSTGQGSETLYF;TRA:CAASRQGGSAKLIF
clone_899_H11	clonotype1768H11	1	TRB:CASSPWTVQDTQYF;TRA:CAAGDSGGSNAKLTF
clone_900_H11	clonotype1769H11	1	TRB:CASGTGGNQNTLYF;TRB:CASSADRTNSDYTF;TRA:CAASADYAQGLTF
clone_901_H11	clonotype1770H11	1	TRB:CASSYGISNERLFF;TRA:CAASTGGNNKLTF
clone_902_H11	clonotype1772H11	1	TRB:CASSLVAGEDTQYF;TRA:CAARNTNTGKLTF
clone_903_H11	clonotype1773H11	1	TRB:CASSLEGAGGSLYF;TRA:CAASAKGGSAKLIF
clone_904_H11	clonotype1774H11	1	TRB:CASSLVWDSYEQYF;TRA:CAPRATSSGQKLVF
clone_905_H11	clonotype1775H11	1	TRB:CASSLSGGQDTQYF;TRA:CAASAGNYAQGLTF
clone_906_H11	clonotype1776H11	1	TRB:CASSRDWGSETLYF;TRA:CAASVYSGTYQRF
clone_907_H11	clonotype1777H11	1	TRB:CASSMTGPSYEQYF;TRA:CAARMNYAQGLTF
clone_908_H11	clonotype1778H11	1	TRB:CASSLGTGGNTLYF;TRA:CAASGIYNQGKLIF
clone_909_H11	clonotype1779H11	1	TRB:CASSQDWESSYEQYF;TRA:CAASASSGSWQLIF
clone_910_H11	clonotype1780H11	1	TRB:CASNNHWGQDTQYF;TRB:CASSQGSGGALEQYF;TRA:CAASGRGSNYKLTF
clone_911_H11	clonotype1781H11	1	TRB:CASRKGTYNYAEQFF;TRA:CAATSTNAYKVIF
clone_912_H11	clonotype1782H11	1	TRB:CASSSRGGAETLYF;TRA:CAASGASGSWQLIF
clone_913_H11	clonotype1783H11	1	TRB:CASSLGTNYAEQFF;TRA:CAAKGGTNAYKVIF
clone_914_H11	clonotype1784H11	1	TRB:CASSGLGDQNTLYF;TRA:CAASTTASLGKLQF
clone_915_H11	clonotype1785H11	1	TRB:CASSQEDWGSDTQYF;TRA:CAASWGGSALGRLHF
clone_916_H11	clonotype1786H11	1	TRB:CASSSDSNTGQLYF;TRA:CAASARDTNAYKVIF
clone_917_H11	clonotype1787H11	1	TRB:CASSNWGGENTLYF;TRA:CAASQDSGGSNYKLTF
clone_918_H11	clonotype1788H11	1	TRB:CASSPSGGYEQYF;TRB:CASSRTGGNERLFF;TRA:CAASAPGTGSNRLTF
clone_919_H11	clonotype1789H11	1	TRB:CASSSDWRSQNTLYF;TRA:CAASAGTQVVGQLTF
clone_920_H11	clonotype1790H11	1	TRB:CTCSARGVYEQYF;TRA:CAASGATGGNNKLTF
clone_921_H11	clonotype1791H11	1	TRB:CASSSGTGGYEQYF;TRA:CAASANSGGSNAKLTF
clone_922_H11	clonotype1792H11	1	TRB:CASSLPANTGQLYF;TRA:CALSVDSNNRIFF
clone_923_H11	clonotype1793H11	1	TRB:CASSDGGGWRAETLYF;TRB:CASSLTGGPNQDTQYF;TRA:CALSDRGNNNAPRF
clone_924_H11	clonotype1794H11	1	TRB:CASSLDWGGAEQFF;TRA:CALSDATEGADRLTF
clone_925_H11	clonotype1795H11	1	TRB:CASSLRTGQNTLYF;TRA:CALSDRGTGYQNFYF
clone_926_H11	clonotype1796H11	1	TRA:CAASENTGYQNFYF
clone_927_H11	clonotype1797H11	1	TRA:CAASDPEGADRLTF
clone_928_H11	clonotype1798H11	1	TRA:CAASATGGNNKLTF
clone_929_H11	clonotype1799H11	1	TRA:CAASATGGNNKLTF
clone_930_H11	clonotype179H11	1	TRB:CASSPDRKNTLYF;TRA:CAASMYNQGKLIF
clone_931_H11	clonotype1800H11	1	TRA:CAASGDSGYNKLTF
clone_932_H11	clonotype1801H11	1	TRB:CASSLDSSYEQYF
clone_933_H11	clonotype1802H11	1	TRB:CASRGQGAYEQYF
clone_934_H11	clonotype1803H11	1	TRB:CASSIQGAPEQYF
clone_935_H11	clonotype1804H11	1	TRB:CASSIEPNSDYTF
clone_936_H11	clonotype1805H11	1	TRB:CASSIVSQNTLYF
clone_937_H11	clonotype1806H11	1	TRB:CASSIAYNSPLYF
clone_938_H11	clonotype1807H11	1	TRB:CASSMRGRTEVFF
clone_939_H11	clonotype1808H11	1	TRB:CASSMASQNTLYF
clone_940_H11	clonotype1809H11	1	TRB:CASSHRGAETLYF
clone_941_H11	clonotype1810H11	1	TRB:CASSRRGGDTQYF
clone_942_H11	clonotype1811H11	1	TRB:CASSRDWGDEQYF
clone_943_H11	clonotype1812H11	1	TRA:CALSEGTGNYKYVF
clone_944_H11	clonotype1813H11	1	TRA:CALASSGSWQLIF
clone_945_H11	clonotype1814H11	1	TRA:CSATPSNMGYKLTF
clone_946_H11	clonotype1815H11	1	TRA:CAVSAGTGSNRLTF
clone_947_H11	clonotype1816H11	1	TRA:CAASGGSSGNKLIF
clone_948_H11	clonotype1817H11	1	TRA:CAASKSSGSWQLIF
clone_949_H11	clonotype1818H11	1	TRB:CASSKQGARDQNTLYF
clone_950_H11	clonotype1819H11	1	TRB:CASSLGDRNSGNTLYF
clone_951_H11	clonotype1820H11	1	TRB:CASSQERGGNSGNTLYF
clone_952_H11	clonotype1821H11	1	TRB:CASSQDLGGRGQNTLYF
clone_953_H11	clonotype1822H11	1	TRB:CASSQDLGGRGQNTLYF
clone_954_H11	clonotype1823H11	1	TRA:CAPLMSNYNVLYF
clone_955_H11	clonotype1824H11	1	TRA:CALSEKNAYKVIF
clone_956_H11	clonotype1825H11	1	TRA:CALSFNTNTGKLTF
clone_957_H11	clonotype1826H11	1	TRA:CALSGGGLSGKLTF
clone_958_H11	clonotype1827H11	1	TRA:CALGDMDYANKMIF
clone_959_H11	clonotype1828H11	1	TRB:CASRDWGGSYAEQFF
clone_960_H11	clonotype1829H11	1	TRB:CASSTGTGHNQAPLF
clone_961_H11	clonotype182H11	1	TRB:CASSPRQTYNSPLYF;TRA:CAMEKGADRLTF
clone_962_H11	clonotype1831H11	1	TRB:CASSADWGNYAEQFF
clone_963_H11	clonotype1832H11	1	TRB:CASSADWGNYAEQFF
clone_964_H11	clonotype1833H11	1	TRB:CASSADWGNYAEQFF
clone_965_H11	clonotype1834H11	1	TRB:CASSADWGNYAEQFF
clone_966_H11	clonotype1835H11	1	TRB:CASSSGGRIAETLYF
clone_967_H11	clonotype1836H11	1	TRB:CASSLRGTENTEVFF
clone_968_H11	clonotype1837H11	1	TRB:CASSLEWGGYAEQFF
clone_969_H11	clonotype1838H11	1	TRB:CASSLAGQGNSDYTF
clone_970_H11	clonotype1839H11	1	TRB:CASSLAGANTGQLYF
clone_971_H11	clonotype1840H11	1	TRB:CASSLGRVSGNTLYF
clone_972_H11	clonotype1842H11	1	TRB:CASSLGRVSGNTLYF
clone_973_H11	clonotype1843H11	1	TRB:CASSLGGGVAETLYF
clone_974_H11	clonotype1844H11	1	TRB:CASSLVPGSQNTLYF
clone_975_H11	clonotype1845H11	1	TRB:CASSKGLGGAETLYF
clone_976_H11	clonotype1846H11	1	TRB:CASSPDGISNERLFF
clone_977_H11	clonotype1847H11	1	TRB:CASSSGQGSAETLYF
clone_978_H11	clonotype1849H11	1	TRB:CASSLDPGGAREQYF
clone_979_H11	clonotype1850H11	1	TRB:CASSLDPGGAREQYF
clone_980_H11	clonotype1851H11	1	TRB:CASSLGGGGQDTQYF
clone_981_H11	clonotype1852H11	1	TRB:CASSLGGADTGQLYF
clone_982_H11	clonotype1854H11	1	TRB:CASSLVQGNYAEQFF
clone_983_H11	clonotype1855H11	1	TRB:CASSLAGISNERLFF
clone_984_H11	clonotype1856H11	1	TRB:CASSFLGVNYAEQFF
clone_985_H11	clonotype1857H11	1	TRB:CASSFGGGGAETLYF
clone_986_H11	clonotype1858H11	1	TRB:CASSLGHANTGQLYF
clone_987_H11	clonotype1859H11	1	TRB:CASSRRTGVYAEQFF
clone_988_H11	clonotype1860H11	1	TRB:CASSLRTHANSDYTF
clone_989_H11	clonotype1861H11	1	TRB:CASSLPGPSNSDYTF
clone_990_H11	clonotype1863H11	1	TRB:CASSLWDSPYAEQFF
clone_991_H11	clonotype1864H11	1	TRB:CASTLGLGGSYEQYF
clone_992_H11	clonotype1865H11	1	TRB:CASSPGTISNERLFF
clone_993_H11	clonotype1867H11	1	TRB:CASSFRRGGQNTLYF
clone_994_H11	clonotype1868H11	1	TRB:CASSFDWGNSYEQYF
clone_995_H11	clonotype186H11	1	TRB:CASSQELGSAETLYF;TRA:CALSEGTGYQNFYF
clone_996_H11	clonotype1870H11	1	TRB:CASSLRQGGNERLFF
clone_997_H11	clonotype1871H11	1	TRB:CASSLMGGSNERLFF
clone_998_H11	clonotype1872H11	1	TRB:CASSLLGLSAETLYF
clone_999_H11	clonotype1873H11	1	TRB:CASSDRPGGAGQDTQYF
clone_1000_H11	clonotype1874H11	1	TRB:CASSQPGQGSGNTLYF
clone_1001_H11	clonotype1875H11	1	TRB:CASSQDSWGVSYEQYF
clone_1002_H11	clonotype1877H11	1	TRB:CASSQAGQGAGTEVFF
clone_1003_H11	clonotype1878H11	1	TRB:CASSQAGQGAGTEVFF
clone_1004_H11	clonotype1879H11	1	TRB:CASSPPGLENTGQLYF
clone_1005_H11	clonotype1880H11	1	TRB:CSSSQMGVNYAEQFF
clone_1006_H11	clonotype1881H11	1	TRB:CSSSPTGWNTGQLYF
clone_1007_H11	clonotype1882H11	1	TRB:CTCSGDNSGNTLYF
clone_1008_H11	clonotype1883H11	1	TRB:CTCSDRQGQNTLYF
clone_1009_H11	clonotype1884H11	1	TRB:CTCSADNSAETLYF
clone_1010_H11	clonotype1885H11	1	TRB:CTCSADRQNTEVFF
clone_1011_H11	clonotype1886H11	1	TRB:CTCSADLGAETLYF
clone_1012_H11	clonotype1888H11	1	TRB:CTCSAARGDTEVFF
clone_1013_H11	clonotype1889H11	1	TRB:CTCSAGQNTGQLYF
clone_1014_H11	clonotype188H11	1	TRB:CASSLEGSQDTQYF;TRA:CALGQSNYNVLYF
clone_1015_H11	clonotype1890H11	1	TRB:CTCSAGTSGNTLYF
clone_1016_H11	clonotype1891H11	1	TRB:CTCSAGTGGRTLYF
clone_1017_H11	clonotype1892H11	1	TRB:CTCSAGERQDTQYF
clone_1018_H11	clonotype1893H11	1	TRB:CTCSATGENSPLYF
clone_1019_H11	clonotype1894H11	1	TRB:CTCSAGGRGAEQFF
clone_1020_H11	clonotype1895H11	1	TRB:CTCSGQDSAETLYF
clone_1021_H11	clonotype1896H11	1	TRB:CTCSGRDKNTEVFF
clone_1022_H11	clonotype1897H11	1	TRB:CTCSGTGAQNTLYF
clone_1023_H11	clonotype1898H11	1	TRA:CALEPITGNTGKLIF
clone_1024_H11	clonotype1899H11	1	TRB:CASSPRENTEVFF;TRA:CWGYAQGLTF
clone_1025_H11	clonotype1900H11	1	TRB:CASSLGTDTEVFF;TRA:CILRAGYQNFYF
clone_1026_H11	clonotype1901H11	1	TRB:CASSQDLGGRGQNTLYF;TRA:CATGSNNRIFF
clone_1027_H11	clonotype1902H11	1	TRB:CASSPDRDANSDYTF;TRA:CAISNNRIFF
clone_1028_H11	clonotype1903H11	1	TRB:CTCSTGSYNSPLYF;TRA:CAMVGNRIFF
clone_1029_H11	clonotype1904H11	1	TRB:CASSIRDKNTLYF;TRA:CAGTGKLTF
clone_1030_H11	clonotype1905H11	1	TRB:CASSDRGTSAETLYF;TRA:CAPDTNAYKVIF
clone_1031_H11	clonotype1906H11	1	TRB:CASSPTNYAEQFF;TRA:CAFLDYANKMIF
clone_1032_H11	clonotype1907H11	1	TRB:CASSFWGGSSAETLYF;TRA:CAARNSNNRIFF
clone_1033_H11	clonotype1908H11	1	TRB:CASSPGTGVRGEQFF;TRA:CIVTDRGYAQGLTF
clone_1034_H11	clonotype1909H11	1	TRB:CASSFYWGDYAEQFF;TRA:CILRSPSNTNKVVF
clone_1035_H11	clonotype1910H11	1	TRB:CTCSDRGANTEVFF;TRA:CAAATNTGKLTF
clone_1036_H11	clonotype1911H11	1	TRB:CTCSAPGQQNTLYF;TRA:CATAMSNYNVLYF
clone_1037_H11	clonotype1912H11	1	TRB:CASSRSNYAEQFF;TRA:CATPNYNQGKLIF
clone_1038_H11	clonotype1913H11	1	TRB:CASSLDLGGRREQYF;TRB:CASSLDRGRAETLYF;TRA:CAAEASNTGKLTF;TRA:CALSKNYAQGLTF
clone_1039_H11	clonotype1914H11	1	TRB:CASTRTGTTNERLFF;TRA:CAVTSNNRLTL
clone_1040_H11	clonotype1915H11	1	TRB:CASSRLGGNQDTQYF;TRA:CALERGNTNKVVF
clone_1041_H11	clonotype1916H11	1	TRB:CASSDPQGRSSGNTLYF;TRA:CAIFSGGNYKPTF;TRA:CAVEEMTNSAGNKLTF
clone_1042_H11	clonotype1917H11	1	TRB:CASGDAGGGGGQDTQYF;TRA:CAPESGSFNKLTF
clone_1043_H11	clonotype1918H11	1	TRB:CASSQERGPLGNTLYF;TRA:CAAEINGNEKITF
clone_1044_H11	clonotype1919H11	1	TRB:CSSSPGGARAETLYF;TRA:CAADGTGNYKYVF;TRA:CAMEASSGSWQLIF
clone_1045_H11	clonotype191H11	1	TRB:CASSFGGNSAETLYF;TRA:CAAEWMSNYNVLYF
clone_1046_H11	clonotype1920H11	1	TRB:CTCSGDISQNTLYF;TRA:CATSYGSSGNKLIF
clone_1047_H11	clonotype1921H11	1	TRB:CTCSGDRSSYEQYF;TRA:CAATGFASALTF;TRA:CAVSSSSGSWQLIF
clone_1048_H11	clonotype1922H11	1	TRB:CTCAPGQDTGQLYF;TRA:CAAEVGSNYQLIW
clone_1049_H11	clonotype1924H11	1	TRB:CASSLERGPNTEVFF;TRB:CASSRLGQDTQYF;TRA:CATGNYAQGLTF
clone_1050_H11	clonotype1925H11	1	TRB:CASSPEGVATGQLYF;TRA:CAATGGGGYKVVF;TRA:CALRLNYNVLYF
clone_1051_H11	clonotype1926H11	1	TRB:CASSLQGDGNSDYTF;TRA:CASNQGKLIF
clone_1052_H11	clonotype1927H11	1	TRB:CASSLSTGGGSDYTF;TRA:CAGNYNQGKLIF
clone_1053_H11	clonotype1928H11	1	TRB:CASSLEPGLGANTGQLYF;TRB:CASTPQTFNQDTQYF;TRA:CAGMSNYNVLYF
clone_1054_H11	clonotype1929H11	1	TRB:CASSQEGLENTGQLYF;TRA:CAAERGSALGRLHF;TRA:CALSDQNTGNYKYVF
clone_1055_H11	clonotype1930H11	1	TRB:CASSRGLGASAETLYF;TRA:CASHYNTNTGKLTF
clone_1056_H11	clonotype1931H11	1	TRB:CTCSARQGNQAPLF;TRA:CAVSSGSWQLIF
clone_1057_H11	clonotype1932H11	1	TRB:CTCSATGGDTEVFF;TRA:CAVDNAGAKLTF
clone_1058_H11	clonotype1933H11	1	TRB:CTCSGLASQNTLYF;TRA:CAAGEQGTGSKLSF;TRA:CAAPSGGSNAKLTF
clone_1059_H11	clonotype1934H11	1	TRB:CASNDNNNQAPLF;TRA:CAASINNRIFF
clone_1060_H11	clonotype1935H11	1	TRB:CASSTGVQDTQYF;TRB:CTCSAWASQNTLYF;TRA:CAAPMSNYNVLYF;TRA:CALSHTGSGGKLTL
clone_1061_H11	clonotype1936H11	1	TRB:CASSIPSNTEVFF;TRA:CAASMGSNNRIFF
clone_1062_H11	clonotype1937H11	1	TRB:CASSLTHPGGYEQYF;TRA:CSASHNYQLIW
clone_1063_H11	clonotype1938H11	1	TRB:CASSLEAGGRDTQYF;TRA:CAVSIPNTNKVVF
clone_1064_H11	clonotype1939H11	1	TRB:CASSLEDSANSDYTF;TRA:CALSANSNNRIFF
clone_1065_H11	clonotype1940H11	1	TRB:CASSSHRDNNQAPLF;TRA:CATEPSGSWQLIF
clone_1066_H11	clonotype1942H11	1	TRB:CASSRTGGSQNTLYF;TRA:CAMERQQGTGSKLSF
clone_1067_H11	clonotype1943H11	1	TRB:CASSPRLPSAETLYF;TRA:CAVSNMGYKLTF
clone_1068_H11	clonotype1944H11	1	TRB:CASSLPRERGTEVFF;TRA:CVLGFNYANKMIF
clone_1069_H11	clonotype1945H11	1	TRB:CASSFVGASQNTLYF;TRA:CALGTGNTGKLIF
clone_1070_H11	clonotype1946H11	1	TRB:CASSFWGASQNTLYF;TRA:CAVGTGSNRLTF
clone_1071_H11	clonotype1947H11	1	TRB:CASRKLGASSYEQYF;TRA:CAVSMNSGTYQRF
clone_1072_H11	clonotype1948H11	1	TRB:CASSQAGGRDYAEQFF;TRA:CALTHNNNNAPRF
clone_1073_H11	clonotype1949H11	1	TRB:CTCSADPRGYEQYF;TRA:CAVSGSNNRIFF
clone_1074_H11	clonotype1950H11	1	TRB:CASSLEDWDEQYF;TRB:CTCSADAQFTEVFF;TRA:CALEGGGRALIF
clone_1075_H11	clonotype1951H11	1	TRB:CTCSAVTRNTEVFF;TRA:CAVSALSNNRIFF
clone_1076_H11	clonotype1952H11	1	TRB:CTCSARVNQDTQYF;TRA:CATGTGNTGKLIF
clone_1077_H11	clonotype1953H11	1	TRB:CTCSAQGSGNTLYF;TRA:CAASTMGNNRIFF
clone_1078_H11	clonotype1954H11	1	TRB:CTCSARQGQDTQYF;TRA:CAPSNNRIFF
clone_1079_H11	clonotype1955H11	1	TRB:CASSFYWGGADAEQFF;TRB:CTCSGGPSNTEVFF;TRA:CAVSMGYQNFYF
clone_1080_H11	clonotype1956H11	1	TRB:CASSIGEDTEVFF;TRA:CALEGAGYQNFYF;TRA:CAVRDTEGADRLTF
clone_1081_H11	clonotype1957H11	1	TRB:CASSIWGDYEQYF;TRA:CAVSSNYGNEKITF
clone_1082_H11	clonotype1958H11	1	TRB:CASSMGTGAEVFF;TRA:CALSDYNVLYF
clone_1083_H11	clonotype1959H11	1	TRB:CASSIRQNTEVFF;TRA:CAASRDTGYQNFYF
clone_1084_H11	clonotype1960H11	1	TRB:CASSQRTGGANTGQLYF;TRB:CASSTGDWGEGQNTLYF;TRA:CAASEHGGNYQLIW
clone_1085_H11	clonotype1961H11	1	TRB:CASSLAGRDTGQLYF;TRB:CASSLGRASGNTLYF;TRA:CALVETQGGRALIF;TRA:CATDEGTGGYKVVF
clone_1086_H11	clonotype1962H11	1	TRB:CASSPQGATGNTLYF;TRA:CAVRDLGNTNTGKLTF
clone_1087_H11	clonotype1963H11	1	TRB:CASSSRDRANSDYTF;TRA:CAASGTSGSWQLIF
clone_1088_H11	clonotype1964H11	1	TRB:CASSSTGGNYAEQFF;TRA:CAVMSNYNVLYF
clone_1089_H11	clonotype1965H11	1	TRB:CASSLEPNSGNTLYF;TRA:CAVSAYNQGKLIF
clone_1090_H11	clonotype1966H11	1	TRB:CASSLETGRNSDYTF;TRA:CAASEGYSNNRLTL
clone_1091_H11	clonotype1967H11	1	TRB:CASSPRLGGLYEQYF;TRB:CTCSLGGRYAEQFF;TRA:CAASGTGTGSNRLTF;TRA:CALSPGGSNAKLTF
clone_1092_H11	clonotype1968H11	1	TRB:CASSPHREGTGQLYF;TRA:CAVMVNYNQGKLIF
clone_1093_H11	clonotype1970H11	1	TRB:CASSLDWGGAETLYF;TRB:CASSRTGGSSYEQYF;TRA:CAASETTGNYKYVF;TRA:CAVHDSGYNKLTF
clone_1094_H11	clonotype1971H11	1	TRB:CASSQDWGASSYEQYF;TRA:CALGDTSSGQKLVF;TRA:CALRRTGNTGKLIF
clone_1095_H11	clonotype1972H11	1	TRB:CASSQDLGQDSYEQYF;TRA:CAASRYAQGLTF
clone_1096_H11	clonotype1973H11	1	TRB:CSSSQEGGTAETLYF;TRA:CAAKYNQGKLIF
clone_1097_H11	clonotype1974H11	1	TRB:CSSSQSIEGYTEVFF;TRA:CAVSMRQGGRALIF
clone_1098_H11	clonotype1975H11	1	TRB:CSSSQSAGGSAEQFF;TRA:CALRNYAQGLTF
clone_1099_H11	clonotype1976H11	1	TRB:CSSSGGTPPNERLFF;TRA:CAVSIGNSGTYQRF
clone_1100_H11	clonotype1977H11	1	TRB:CTCSAGQVNSPLYF;TRA:CAASYYNQGKLIF;TRA:CALSRTGGYKVVF
clone_1101_H11	clonotype1978H11	1	TRB:CTCSAGRGLTEVFF;TRA:CALPSSGSFNKLTF
clone_1102_H11	clonotype1979H11	1	TRB:CTCSGRDKNTEVFF;TRA:CAASRVGDNSKLIW
clone_1103_H11	clonotype1980H11	1	TRB:CASSIRAQDTQYF;TRA:CAIDNNAGAKLTF;TRA:CALTRNNNNAPRF
clone_1104_H11	clonotype1981H11	1	TRB:CASRRDWGNYAEQFF;TRA:CAASTANYNVLYF
clone_1105_H11	clonotype1982H11	1	TRB:CASSPDWGNYAEQFF;TRA:CAVWGATNAYKVIF
clone_1106_H11	clonotype1983H11	1	TRB:CASSWTGGLRAEQFF;TRA:CALSDPAEGADRLTF
clone_1107_H11	clonotype1984H11	1	TRB:CASSLRWGSAETLYF;TRA:CAVSPYQGGRALIF
clone_1108_H11	clonotype1985H11	1	TRB:CASSLEASTNSDYTF;TRA:CAASMEVVGQLTF
clone_1109_H11	clonotype1986H11	1	TRB:CASSLASGGYAEQFF;TRA:CALSIGNYAQGLTF
clone_1110_H11	clonotype1987H11	1	TRB:CASSLSWGNYAEQFF;TRA:CAASGRGYQNFYF
clone_1111_H11	clonotype1988H11	1	TRB:CASSRDWGSAETLYF;TRA:CAVRTTASLGKLQF
clone_1112_H11	clonotype1989H11	1	TRB:CASSIEGVNSPLYF;TRB:CASSSWTGGSYEQYF;TRA:CALGEGSNYQLIW;TRA:CALSMSASLGKLQF
clone_1113_H11	clonotype1990H11	1	TRB:CASSLNWGGTGQLYF;TRA:CVLRFQGGSAKLIF
clone_1114_H11	clonotype1991H11	1	TRB:CASSRFGTGQDTQYF;TRA:CALGTGNTGKLIF;TRA:CAVSGSSSSFSKLVF
clone_1115_H11	clonotype1992H11	1	TRB:CASSTTGGANERLFF;TRA:CAASELNYNQGKLIF
clone_1116_H11	clonotype1993H11	1	TRB:CASSLGGAGTGQLYF;TRA:CAASKNSNNRIFF
clone_1117_H11	clonotype1994H11	1	TRB:CASSGRTGGFNQDTQYF;TRA:CAASLPGTGSNRLTF
clone_1118_H11	clonotype1995H11	1	TRB:CASSQDGSANTGQLYF;TRA:CALGLNYNQGKLIF;TRA:CAMERGGSALGRLHF
clone_1119_H11	clonotype1996H11	1	TRB:CTCSATTSQNTLYF;TRA:CAASNSAGNKLTF;TRA:CALWELASDSGYNKLTF
clone_1120_H11	clonotype1998H11	1	TRB:CASSRGAGNTLYF;TRA:CAASLNNAGAKLTF
clone_1121_H11	clonotype1999H11	1	TRB:CASSIRGYAEQFF;TRA:CALSEDTGNYKYVF
clone_1122_H11	clonotype2000H11	1	TRB:CASGDEAGGNTGQLYF;TRB:CASGHISNERLFF;TRA:CALGSGGNYKPTF
clone_1123_H11	clonotype2002H11	1	TRB:CASSYGTGGHSDYTF;TRA:CAVSLSNTGYQNFYF
clone_1124_H11	clonotype2003H11	1	TRB:CASSSQGNNQDTQYF;TRA:CAVSAGTNAYKVIF
clone_1125_H11	clonotype2004H11	1	TRB:CASSSDWGGTGQLYF;TRA:CAYITGNTGKLIF
clone_1126_H11	clonotype2005H11	1	TRB:CASSLEQGAGNTLYF;TRB:CASSLLGGADQDTQYF;TRA:CALSRLTSGGNYKPTF
clone_1127_H11	clonotype2006H11	1	TRB:CASSLAGRGQGEVFF;TRA:CALSEDSGTYQRF
clone_1128_H11	clonotype2007H11	1	TRB:CASSIASLYAEQFF;TRB:CASSQAGQGAGTEVFF;TRA:CAAGASQGGSAKLIF;TRA:CALSGGGLSGKLTF
clone_1129_H11	clonotype2008H11	1	TRB:CTCSATDSGNTLYF;TRA:CAASIKNSGTYQRF
clone_1130_H11	clonotype2010H11	1	TRB:CASSQEGLGGRQDTQYF;TRA:CALSESSGSWQLIF
clone_1131_H11	clonotype2011H11	1	TRB:CASSTTGASSYEQYF;TRA:CALSDQDYAQGLTF
clone_1132_H11	clonotype2012H11	1	TRB:CASSLTGGYNSPLYF;TRA:CALGGTNAYKVIF
clone_1133_H11	clonotype2013H11	1	TRB:CASGDPGQGADNQAPLF;TRA:CAMRPQGTGSKLSF
clone_1134_H11	clonotype2014H11	1	TRB:CASSLDGRGNYAEQFF;TRB:CTCSAGLGPYEQYF;TRA:CALALRTQVVGQLTF;TRA:CALGNSGGSNYKLTF
clone_1135_H11	clonotype2015H11	1	TRB:CTCSADRDQDTQYF;TRA:CVVGDRGSALGRLHF
clone_1136_H11	clonotype2016H11	1	TRB:CTCSGTGSQNTLYF;TRA:CALAPNMGYKLTF
clone_1137_H11	clonotype2017H11	1	TRB:CASSEQVSNERLFF;TRB:CASSLSGTAIGQLYF;TRA:CAVSLVTSGGNYKPTF
clone_1138_H11	clonotype2018H11	1	TRB:CASSQDAASSNERLFF;TRA:CALSLNVGDNSKLIW
clone_1139_H11	clonotype2019H11	1	TRB:CSSSLGLGVYAEQFF;TRA:CALGDRTGYQNFYF
clone_1140_H11	clonotype2020H11	1	TRB:CASSLRDNNNQAPLF;TRA:CAAADYANKMIF
clone_1141_H11	clonotype2021H11	1	TRB:CASSHGLGGRGAETLYF;TRA:CAAGDYANKMIF
clone_1142_H11	clonotype2022H11	1	TRB:CASSLGPGTGVTLYF;TRA:CAVRSNNRIFF
clone_1143_H11	clonotype2023H11	1	TRB:CTCSARHRGGEQYF;TRA:CAAGSGGSNAKLTF
clone_1144_H11	clonotype2024H11	1	TRB:CASSISSQNTLYF;TRA:CAANYQGGSAKLIF
clone_1145_H11	clonotype2025H11	1	TRB:CASSLARVANERLFF;TRA:CAATASSGSWQLIF
clone_1146_H11	clonotype2026H11	1	TRB:CASSFPGGGNTEVFF;TRA:CAASEGSALGRLHF
clone_1147_H11	clonotype2027H11	1	TRB:CASSFWGANTGQLYF;TRA:CAASGNTGYQNFYF
clone_1148_H11	clonotype2028H11	1	TRB:CASSQELGEGQDTQYF;TRA:CAAGANTEGADRLTF
clone_1149_H11	clonotype2029H11	1	TRB:CTCSADRDGFEQYF;TRA:CAASANTGYQNFYF
clone_1150_H11	clonotype202H11	1	TRB:CASSLGRRSQNTLYF;TRA:CALSDANSGTYQRF
clone_1151_H11	clonotype2030H11	1	TRB:CASSIDPGREQYF;TRA:CAASKGQGGSAKLIF
clone_1152_H11	clonotype2031H11	1	TRB:CASSPWQGGAETLYF;TRA:CAARNTEGADRLTF
clone_1153_H11	clonotype2032H11	1	TRB:CASSLEQTSQNTLYF;TRA:CAARRGSALGRLHF
clone_1154_H11	clonotype2033H11	1	TRB:CASSVPGQANTEVFF;TRA:CAASGHTGNYKYVF
clone_1155_H11	clonotype2034H11	1	TRB:CASSLLGGGAETLYF;TRA:CAASGSSALGRLHF
clone_1156_H11	clonotype2036H11	1	TRB:CASSRLGGGNTGQLYF;TRA:CAASGTGNTGKLIF
clone_1157_H11	clonotype2037H11	1	TRB:CASSPGTGRQDTQYF;TRA:CAASRGNTGGLSGKLTF
clone_1158_H11	clonotype2038H11	1	TRB:CTCSATGDNSPLYF;TRA:CAASATNTGANTGKLTF
clone_1159_H11	clonotype2039H11	1	TRB:CTCSGDRANTEVFF;TRA:CALSTQGGSAKLIF
clone_1160_H11	clonotype2040H11	1	TRB:CASSRDWGGNYAEQFF;TRA:CALSDHSSSFSKLVF
clone_1161_H11	clonotype2041H11	1	TRB:CASSLGQGYNSPLYF;TRA:CALSASYGSSGNKLIF
clone_1162_H11	clonotype2042H11	1	TRB:CATGDRGPNSDYTF
clone_1163_H11	clonotype2043H11	1	TRB:CASSKTGGSGQLYF
clone_1164_H11	clonotype2044H11	1	TRB:CASSIRGAQDTQYF
clone_1165_H11	clonotype2046H11	1	TRB:CASSIDWGSYEQYF
clone_1166_H11	clonotype2047H11	1	TRB:CASSIEGTNAEQFF
clone_1167_H11	clonotype2048H11	1	TRB:CASSIEGTNAEQFF
clone_1168_H11	clonotype2049H11	1	TRB:CASSIVGSQNTLYF
clone_1169_H11	clonotype2050H11	1	TRB:CASSIWGAHAEQFF
clone_1170_H11	clonotype2051H11	1	TRB:CASSIWGGYAEQFF
clone_1171_H11	clonotype2052H11	1	TRB:CASSIWGGYAEQFF
clone_1172_H11	clonotype2053H11	1	TRB:CASSIRDRGYEQYF
clone_1173_H11	clonotype2054H11	1	TRB:CASSIGTGSYEQYF
clone_1174_H11	clonotype2055H11	1	TRB:CASSISSSGNTLYF
clone_1175_H11	clonotype2056H11	1	TRB:CASSICRVTERLFF
clone_1176_H11	clonotype2057H11	1	TRB:CASSPRQGRDTQYF
clone_1177_H11	clonotype2058H11	1	TRB:CASSLQGGQNTLYF
clone_1178_H11	clonotype2059H11	1	TRB:CASSWDSANTEVFF
clone_1179_H11	clonotype2060H11	1	TRA:CALRWKGGSAKLIF
clone_1180_H11	clonotype2061H11	1	TRA:CAVSEGGSALGRLHF
clone_1181_H11	clonotype2062H11	1	TRA:CAASMTNSAGNKLTF
clone_1182_H11	clonotype2063H11	1	TRA:CALRNQGGSAKLIF
clone_1183_H11	clonotype2064H11	1	TRA:CALSDHNMGYKLTF
clone_1184_H11	clonotype2065H11	1	TRA:CAMREGYANKMIF
clone_1185_H11	clonotype2066H11	1	TRA:CALGEATGGNNKLTF
clone_1186_H11	clonotype2067H11	1	TRA:CALGDPNSAGNKLTF
clone_1187_H11	clonotype2068H11	1	TRB:CASSSTGGVTTGQLYF
clone_1188_H11	clonotype2069H11	1	TRB:CASSSDWGGNYAEQFF
clone_1189_H11	clonotype2070H11	1	TRB:CASSSDWGGNYAEQFF
clone_1190_H11	clonotype2071H11	1	TRB:CASSSGRDGYTGQLYF
clone_1191_H11	clonotype2072H11	1	TRB:CASSLGGLGNYAEQFF
clone_1192_H11	clonotype2073H11	1	TRB:CASSSGTGGNTGQLYF
clone_1193_H11	clonotype2074H11	1	TRB:CASSSGLGPSQNTLYF
clone_1194_H11	clonotype2075H11	1	TRB:CASSWDRGRSQNTLYF
clone_1195_H11	clonotype2076H11	1	TRB:CASSLLGGYNYAEQFF
clone_1196_H11	clonotype2077H11	1	TRB:CASSLLGGYNYAEQFF
clone_1197_H11	clonotype2078H11	1	TRB:CASSLLGGYNYAEQFF
clone_1198_H11	clonotype2079H11	1	TRB:CASSLLGGYNYAEQFF
clone_1199_H11	clonotype2081H11	1	TRB:CASSLDLWGGYAEQFF
clone_1200_H11	clonotype2082H11	1	TRB:CASSPTGLGGNERLFF
clone_1201_H11	clonotype2083H11	1	TRB:CASSLLGGYNYAEQFF
clone_1202_H11	clonotype2084H11	1	TRB:CASSSDWGGAGQNTLYF
clone_1203_H11	clonotype2085H11	1	TRA:CALTRNNNNAPRF
clone_1204_H11	clonotype2086H11	1	TRB:CSSSQSKGQSSYEQYF
clone_1205_H11	clonotype2088H11	1	TRB:CTCSARDRNTGQLYF
clone_1206_H11	clonotype2089H11	1	TRB:CTCSARDRGNTEVFF
clone_1207_H11	clonotype2090H11	1	TRB:CTCSADLRIKSEVFF
clone_1208_H11	clonotype2091H11	1	TRB:CTCSADLRIKSEVFF
clone_1209_H11	clonotype2093H11	1	TRB:CTCSADFSPGERLFF
clone_1210_H11	clonotype2095H11	1	TRB:CTCSAVRGRGDTQYF
clone_1211_H11	clonotype2097H11	1	TRB:CTCSATGGSQDTQYF
clone_1212_H11	clonotype2098H11	1	TRB:CTCSGYWGNQDTQYF
clone_1213_H11	clonotype2099H11	1	TRB:CTCSADNWGGETLYF;TRA:CILQGTGSKLSF
clone_1214_H11	clonotype2100H11	1	TRB:CARGLQNTLYF;TRB:CASSIGGADTEVFF;TRA:CILRVNYAQGLTF
clone_1215_H11	clonotype2101H11	1	TRB:CASSLGDRAYNSPLYF;TRA:CERDMGYKLTF
clone_1216_H11	clonotype2102H11	1	TRB:CTCSAETGVAETLYF;TRA:CAIGNYNVLYF
clone_1217_H11	clonotype2103H11	1	TRB:CASSIDLNQDTQYF;TRA:CALVNYAQGLTF
clone_1218_H11	clonotype2104H11	1	TRB:CASSMGQGASDYTF;TRA:CIVTDQDSGTYQRF
clone_1219_H11	clonotype2106H11	1	TRB:CASSLGTGGDSYEQYF;TRA:CAVSDNRIFF
clone_1220_H11	clonotype2107H11	1	TRB:CTCSAEDIYNSPLYF;TRA:CAANYNQGKLIF;TRA:CAATSNTNKVVF
clone_1221_H11	clonotype2108H11	1	TRB:CTCSGQGGSGNTLYF;TRA:CAANYNQGKLIF
clone_1222_H11	clonotype2109H11	1	TRB:CASRPGLGGVEQYF;TRB:CASSLTPNRGNSPLYF;TRA:CAAEATNAYKVIF
clone_1223_H11	clonotype2110H11	1	TRB:CAKLGGPNTEVFF;TRB:CASSDWGGAETLYF;TRA:CALERNNNNAPRF
clone_1224_H11	clonotype2111H11	1	TRB:CASSSGTGGNTLYF;TRA:CAAVHNAGAKLTF
clone_1225_H11	clonotype2112H11	1	TRB:CASSSLWGSSAETLYF;TRA:CAMRGSAKLIF
clone_1226_H11	clonotype2113H11	1	TRB:CASSLVGGWGQNTLYF;TRA:CILRVGGTGYQNFYF
clone_1227_H11	clonotype2114H11	1	TRB:CTCSAEGGLQNTLYF;TRA:CAVGSFNKLTF
clone_1228_H11	clonotype2115H11	1	TRB:CTCSADDYNNQAPLF;TRA:CILRGLTGNTGKLIF
clone_1229_H11	clonotype2116H11	1	TRB:CTCSAVGQGDQAPLF;TRA:CAVGSNNRIFF
clone_1230_H11	clonotype2117H11	1	TRB:CASSIAAGQYEQYF;TRA:CALDASNMGYKLTF
clone_1231_H11	clonotype2118H11	1	TRB:CASSIGTGWDTQYF;TRA:CALAPEGADRLTF;TRA:CVLYTGANTGKLTF
clone_1232_H11	clonotype2120H11	1	TRB:CASSLARQLSNERLFF;TRA:CAAVPNTNKVVF
clone_1233_H11	clonotype2121H11	1	TRB:CASSLSRGAANERLFF;TRA:CASTSSGQKLVF
clone_1234_H11	clonotype2122H11	1	TRB:CASSLDRAFYNSPLYF;TRB:CASSPDRPYSGNTLYF;TRA:CAVRQGGRALIF
clone_1235_H11	clonotype2123H11	1	TRB:CTCSAEGQGGTEVFF;TRA:CAASKRYNVLYF
clone_1236_H11	clonotype2124H11	1	TRB:CASSLAFYEQYF;TRB:CTCSADTGRTERLFF;TRA:CALSNRIFF
clone_1237_H11	clonotype2125H11	1	TRB:CTCSAYRLSGNTLYF;TRA:CAMEQQGTGSKLSF
clone_1238_H11	clonotype2126H11	1	TRB:CASTPGQGWAEQFF;TRA:CALRDTNAYKVIF
clone_1239_H11	clonotype2127H11	1	TRB:CASSIEDRVNTQYF;TRA:CALSRYSNNRLTL
clone_1240_H11	clonotype2128H11	1	TRB:CASSIFGYNQAPLF;TRA:CAVSRNSNNRIFF
clone_1241_H11	clonotype2129H11	1	TRB:CASSIWGANSDYTF;TRA:CAFMNYNQGKLIF
clone_1242_H11	clonotype2130H11	1	TRB:CASSIRGDNSPLYF;TRA:CAVASSGSWQLIF
clone_1243_H11	clonotype2131H11	1	TRB:CASSFDRENQAPLF;TRA:CALILYSNNRLTL
clone_1244_H11	clonotype2132H11	1	TRB:CASSLLRQGGAETLYF;TRA:CAVSAQSNNRIFF
clone_1245_H11	clonotype2133H11	1	TRB:CTCSETGGAPGQLYF;TRA:CAAEDASSGSWQLIF
clone_1246_H11	clonotype2134H11	1	TRB:CTCSADAGAGAEQFF;TRA:CAVGPGGNYKPTF
clone_1247_H11	clonotype2135H11	1	TRB:CTCSATGIGAETLYF;TRA:CAASINMGYKLTF
clone_1248_H11	clonotype2136H11	1	TRB:CASSTTGGARAETLYF;TRA:CAASGTGNTGKLIF
clone_1249_H11	clonotype2137H11	1	TRB:CASSRDWGGLQDTQYF;TRB:CTCSDDWVSQNTLYF;TRA:CAASDRAGTGSNRLTF;TRA:CVLRNTNTGKLTF
clone_1250_H11	clonotype2138H11	1	TRB:CASSSDWGGNYAEQFF;TRA:CALSYGSSGNKLIF
clone_1251_H11	clonotype2139H11	1	TRB:CASSLDGGANYAEQFF;TRA:CAASEAGNTGKLIF
clone_1252_H11	clonotype2140H11	1	TRB:CASSKGDSGNTLYF;TRA:CAASRQGGRALIF
clone_1253_H11	clonotype2141H11	1	TRB:CASSIEQANTEVFF;TRA:CVLSAGSALGRLHF
clone_1254_H11	clonotype2142H11	1	TRB:CASSLQGGAETLYF;TRA:CAASMAGYQNFYF
clone_1255_H11	clonotype2143H11	1	TRB:CASSLGWGANTGQLYF;TRA:CAPGDYSNNRLTL
clone_1256_H11	clonotype2144H11	1	TRB:CASSQDLGNSYNSPLYF;TRA:CVLGDNSAGNKLTF
clone_1257_H11	clonotype2145H11	1	TRB:CTCSADWGNYAEQFF;TRA:CAATPSNTNKVVF
clone_1258_H11	clonotype2146H11	1	TRB:CTCSADNRGNQAPLF;TRA:CALKGTGGYKVVF
clone_1259_H11	clonotype2147H11	1	TRB:CASSQASRDWGVAETLYF;TRA:CALGASSGSWQLIF
clone_1260_H11	clonotype2148H11	1	TRB:CASSPGTGGRQNTLYF;TRA:CALITGGSNAKLTF;TRA:CALVKSSGSWQLIF
clone_1261_H11	clonotype2149H11	1	TRB:CASSLYWGGGYAEQFF;TRA:CAASITGNTGKLIF
clone_1262_H11	clonotype2150H11	1	TRB:CASSLDSPRDRDTQYF;TRA:CAVSEGGSNAKLTF
clone_1263_H11	clonotype2151H11	1	TRB:CASSQEGLGSSQNTLYF;TRA:CALVPDTNAYKVIF
clone_1264_H11	clonotype2152H11	1	TRB:CASSQDPGTGVWNTLYF;TRA:CVLGGGRGSALGRLHF
clone_1265_H11	clonotype2154H11	1	TRB:CASSPGTGYAEQFF;TRA:CAMREGRNNNAPRF
clone_1266_H11	clonotype2155H11	1	TRB:CASGQGWNYAEQFF;TRA:CAMSPSGGSNYKLTF
clone_1267_H11	clonotype2156H11	1	TRB:CASSFLGGYNYAEQFF;TRA:CAMREGSGGNNKLTF
clone_1268_H11	clonotype2158H11	1	TRB:CTCSAEGLGEDTQYF;TRA:CALREASSGSWQLIF
clone_1269_H11	clonotype2159H11	1	TRB:CTCSADWGGSYEQYF;TRA:CALGDHTNTGKLTF
clone_1270_H11	clonotype2160H11	1	TRB:CASSSRDRDSDYTF;TRA:CALGDLTSGGNYKPTF
clone_1271_H11	clonotype2161H11	1	TRB:CTCSAGTGGSYEQYF;TRA:CALGGLANSAGNKLTF
clone_1272_H11	clonotype2163H11	1	TRB:CASSKTGGRNTGQLYF;TRA:CAARMDYANKMIF
clone_1273_H11	clonotype2164H11	1	TRB:CASTRDRGQNTLYF;TRA:CAAIGNYAQGLTF
clone_1274_H11	clonotype2165H11	1	TRB:CASSIAWVFYEQYF;TRA:CAAGASGGSNYKLTF
clone_1275_H11	clonotype2166H11	1	TRB:CASSPPGLRNTGQLYF;TRA:CAASASGSFNKLTF
clone_1276_H11	clonotype2167H11	1	TRB:CASSLGTHLSNERLFF;TRA:CAASPLNNYAQGLTF
clone_1277_H11	clonotype2168H11	1	TRB:CASSTGTGAYEQYF;TRA:CALIPNTGYQNFYF
clone_1278_H11	clonotype2169H11	1	TRB:CASRLQGFSNERLFF
clone_1279_H11	clonotype2170H11	1	TRB:CASSIDLSGNTEVFF
clone_1280_H11	clonotype2171H11	1	TRB:CASSIAGQGTETLYF
clone_1281_H11	clonotype2172H11	1	TRB:CASSIGRVYNSPLYF
clone_1282_H11	clonotype2173H11	1	TRB:CASSIGTGSAETLYF
clone_1283_H11	clonotype2174H11	1	TRB:CASSMGRTGSAEQFF
clone_1284_H11	clonotype2175H11	1	TRB:CASSPGGALQNTLYF
clone_1285_H11	clonotype2176H11	1	TRB:CASSRLGGSQNTLYF
clone_1286_H11	clonotype2177H11	1	TRB:CASSLWGINYAEQFF
clone_1287_H11	clonotype2180H11	1	TRA:CALSDSSSGSWQLIF
clone_1288_H11	clonotype2181H11	1	TRA:CALGDLLNTNTGKLTF
clone_1289_H11	clonotype2182H11	1	TRB:CASSLGTGGLSAETLYF
clone_1290_H11	clonotype2183H11	1	TRB:CASSLDSGLGGRGTQYF
clone_1291_H11	clonotype2184H11	1	TRB:CASSLELGPFNQDTQYF
clone_1292_H11	clonotype2185H11	1	TRB:CASSLSMSGASGNTLYF
clone_1293_H11	clonotype2186H11	1	TRA:CALGPNYNQGKLIF
clone_1294_H11	clonotype2187H11	1	TRA:CALGEGTNAYKVIF
clone_1295_H11	clonotype2188H11	1	TRB:CTCSAEDWGSQNTLYF
clone_1296_H11	clonotype2189H11	1	TRB:CTCSADKTGGNSPLYF
clone_1297_H11	clonotype2190H11	1	TRB:CTCSADNGISNERLFF
clone_1298_H11	clonotype2191H11	1	TRB:CTCSADTGASQNTLYF
clone_1299_H11	clonotype2192H11	1	TRB:CTCSADLQENYAEQFF
clone_1300_H11	clonotype2193H11	1	TRB:CTCSADWGGRYAEQFF
clone_1301_H11	clonotype2194H11	1	TRB:CTCSAVGTGVGNTLYF
clone_1302_H11	clonotype2195H11	1	TRB:CTCSAQTGGAGTEVFF
clone_1303_H11	clonotype2196H11	1	TRB:CTCSAVQNSYNSPLYF
clone_1304_H11	clonotype2197H11	1	TRB:CTCSVGLGGGQDTQYF
clone_1305_H11	clonotype2198H11	1	TRB:CASSRDWASAETLYF;TRA:CALEPGYQNFYF
clone_1306_H11	clonotype2199H11	1	TRB:CASSSGLGGRSSYEQYF;TRA:CALEKGGRALIF
clone_1307_H11	clonotype219H11	1	TRB:CASGETANSDYTF;TRA:CAMGGNYAQGLTF
clone_1308_H11	clonotype2200H11	1	TRB:CTCSAELGANTGQLYF;TRA:CAFMSNYNVLYF
clone_1309_H11	clonotype2202H11	1	TRB:CASSTRGFNQDTQYF;TRA:CAMERNSNNRIFF
clone_1310_H11	clonotype2203H11	1	TRB:CASSIRTGGSYEQYF;TRA:CAVRNTGKLTF
clone_1311_H11	clonotype2204H11	1	TRB:CASSIRDWDLYEQYF;TRA:CATDAASNYNVLYF;TRA:CAVSMGYSNNRLTL
clone_1312_H11	clonotype2205H11	1	TRB:CASSPGTGSQNTLYF;TRA:CALRNSNNRIFF
clone_1313_H11	clonotype2206H11	1	TRB:CASSIRDRGDTEVFF;TRA:CAANTGANTGKLTF
clone_1314_H11	clonotype2207H11	1	TRB:CASSMGQGYQNTLYF;TRA:CALWQGGRALIF
clone_1315_H11	clonotype2208H11	1	TRB:CTCSADAVYNYAEQFF;TRA:CASGGTGGYKVVF
clone_1316_H11	clonotype2209H11	1	TRB:CTCSAGTGWGTGQLYF;TRA:CALRGNSNNRIFF
clone_1317_H11	clonotype220H11	1	TRB:CAAGGGRSYEQYF;TRB:CASGDAAWGGYAEQFF;TRA:CALSLSGSFNKLTF
clone_1318_H11	clonotype2211H11	1	TRB:CASSQKLGGRGQDTQYF;TRA:CAASMTNYNVLYF;TRA:CAVTFTGSGGKLTL
clone_1319_H11	clonotype2212H11	1	TRB:CASSLSWGGSDTGQLYF;TRA:CAVSADYGNEKITF
clone_1320_H11	clonotype2213H11	1	TRB:CASGAGATGQLYF;TRB:CASGEGQYEQYF;TRA:CAVPHDTNAYKVIF
clone_1321_H11	clonotype2214H11	1	TRB:CTCSATGQTNTGQLYF;TRA:CAVSMSNYNVLYF
clone_1322_H11	clonotype2215H11	1	TRB:CASSPGTGGYAEQFF;TRA:CAVSDGSFNKLTF
clone_1323_H11	clonotype2216H11	1	TRB:CASSFGRLGGAQNTLYF;TRA:CAVKGYSNNRLTL
clone_1324_H11	clonotype2217H11	1	TRB:CASSKDWGNYAEQFF;TRA:CAVSMYTGANTGKLTF
clone_1325_H11	clonotype2218H11	1	TRB:CASSITQGAGERLFF;TRA:CAASTTEGADRLTF
clone_1326_H11	clonotype2219H11	1	TRB:CASSMGWESSYEQYF;TRA:CAASSQYGSSGNKLIF
clone_1327_H11	clonotype2220H11	1	TRB:CASSIWGSSAETLYF;TRA:CALSVNTGNYKYVF
clone_1328_H11	clonotype2221H11	1	TRB:CASSLVGGAQGAETLYF;TRA:CAMREGLNNNAPRF
clone_1329_H11	clonotype2222H11	1	TRB:CASSLRLGGRGAETLYF;TRA:CAMREVYNNNAPRF
clone_1330_H11	clonotype2223H11	1	TRB:CASSIGGGGQDTQYF;TRA:CAMRENTGYQNFYF
clone_1331_H11	clonotype2224H11	1	TRB:CASGTGDPYNSPLYF;TRA:CALGDWDTNAYKVIF
clone_1332_H11	clonotype2225H11	1	TRB:CASSYYWGGAGQNTLYF;TRA:CALVDYGSSGNKLIF
clone_1333_H11	clonotype2226H11	1	TRB:CASSPGFTGLNYAEQFF;TRA:CAAGEEGTGSKLSF
clone_1334_H11	clonotype2227H11	1	TRB:CASSLARRGSNTGQLYF;TRA:CAASNMGYKLTF
clone_1335_H11	clonotype2228H11	1	TRB:CTCSAGGLISNERLFF;TRA:CAASAGSGGKLTL
clone_1336_H11	clonotype2229H11	1	TRB:CASSIGQGSGNTLYF;TRA:CAAGASGGNYKPTF
clone_1337_H11	clonotype222H11	1	TRB:CASSRLGGDWEQYF;TRA:CAMRDTEGADRLTF
clone_1338_H11	clonotype2231H11	1	TRB:CASSFPSGAANTGQLYF;TRA:CAASVGTGGLSGKLTF
clone_1339_H11	clonotype2232H11	1	TRB:CASSIRGTGNTGQLYF
clone_1340_H11	clonotype2233H11	1	TRB:CASSIAHRDYNSPLYF
clone_1341_H11	clonotype2235H11	1	TRA:CAMREGGTGGYKVVF
clone_1342_H11	clonotype2236H11	1	TRB:CASGGQNYAEQFF
clone_1343_H11	clonotype2237H11	1	TRB:CASSIKRTGRGNTLYF;TRA:CAIDRSGSWQLIF;TRA:CALGASGYNKLTF
clone_1344_H11	clonotype2240H11	1	TRB:CASRSGTGEGIWNSPLYF;TRA:CAIDYGSSGNKLIF
clone_1345_H11	clonotype2241H11	1	TRB:CASSPLGGISNERLFF;TRA:CAVRDTNAYKVIF
clone_1346_H11	clonotype2242H11	1	TRB:CASSLLWTGGALAETLYF;TRA:CALSDGMGYKLTF
clone_1347_H11	clonotype2243H11	1	TRB:CASSIRAGGSQNTLYF;TRA:CALSDSNNRIFF
clone_1348_H11	clonotype2244H11	1	TRB:CTCSAPRGRISNERLFF;TRA:CAASHNAGAKLTF
clone_1349_H11	clonotype2245H11	1	TRB:CASSIERAGEGAEQFF;TRA:CALNSGGSNYKLTF
clone_1350_H11	clonotype2246H11	1	TRB:CASSIDGAGSAETLYF;TRA:CALRNYNQGKLIF
clone_1351_H11	clonotype2247H11	1	TRB:CASSSSGTISNERLFF;TRA:CALSAPISNNRIFF
clone_1352_H11	clonotype2248H11	1	TRB:CASSLDHWGASNTGQLYF;TRA:CALSKRGSALGRLHF
clone_1353_H11	clonotype2249H11	1	TRB:CASGQGNNQAPLF;TRA:CALVRTNAYKVIF
clone_1354_H11	clonotype2250H11	1	TRB:CTCSADPGTVNNQAPLF;TRA:CAPSSSNTNKVVF
clone_1355_H11	clonotype2251H11	1	TRB:CTCSADWTGGSNERLFF;TRA:CAASYGSSGNKLIF
clone_1356_H11	clonotype2252H11	1	TRB:CTCSGPGLGANTGQLYF;TRA:CVVGDRGSALGRLHF
clone_1357_H11	clonotype2253H11	1	TRB:CTCSADRGGTGAETLYF;TRA:CAASGSAGNKLTF
clone_1358_H11	clonotype2254H11	1	TRB:CASSIAPTGGGAETLYF
clone_1359_H11	clonotype2255H11	1	TRB:CASGELGVQDTQYF
clone_1360_H11	clonotype2256H11	1	TRB:CASGDEQGGYEQYF
clone_1361_H11	clonotype2257H11	1	TRB:CASGDAPGFDTQYF
clone_1362_H11	clonotype2259H11	1	TRB:CASGATGANF
clone_1363_H11	clonotype2260H11	1	TRB:CASGEDTQYF
clone_1364_H11	clonotype2261H11	1	TRB:CASGENSYNSPLYF;TRA:CAAGSNTNKVVF
clone_1365_H11	clonotype2262H11	1	TRB:CASFQNTLYF;TRA:CAALDSNYQLIW
clone_1366_H11	clonotype2263H11	1	TRB:CASSIDGLGGYQNTLYF;TRA:CAVDGQGGRALIF
clone_1367_H11	clonotype2264H11	1	TRB:CASGDAEVFF;TRA:CAIDMSNYNVLYF
clone_1368_H11	clonotype2265H11	1	TRB:CASGQDTQYF;TRA:CALSLNTGNYKYVF
clone_1369_H11	clonotype2266H11	1	TRB:CASSLGGVFF;TRA:CAVDTNAYKVIF
clone_1370_H11	clonotype2267H11	1	TRB:CASSLYEQYF;TRA:CAVSMGSGSWQLIF
clone_1371_H11	clonotype2268H11	1	TRB:CASSLERLFF;TRA:CAVSMDNYAQGLTF
clone_1372_H11	clonotype2269H11	1	TRB:CASGDRTFNTEVFF;TRA:CAAENTNTGKLTF;TRA:CAASNFSGSWQLIF
clone_1373_H11	clonotype226H11	1	TRB:CASGGTGGVYEQYF;TRA:CALRDYTGGNNKLTF;TRA:CALSGDSGYNKLTF
clone_1374_H11	clonotype2270H11	1	TRB:CASGGGPAGDTLYF;TRB:CASSPRQGRGTEVFF;TRA:CAMREGMGYKLTF;TRA:CAVSEHLGNMGYKLTF
clone_1375_H11	clonotype2271H11	1	TRB:CTCSAVPGLGASQNTLYF;TRA:CALSDRIPGSFNKLTF
clone_1376_H11	clonotype2272H11	1	TRA:CAAANQGGSAKLIF
clone_1377_H11	clonotype2273H11	1	TRA:CAAGEGGSNYKLTF
clone_1378_H11	clonotype2274H11	1	TRA:CAARVMGYKLTF
clone_1379_H11	clonotype2275H11	1	TRA:CAASQGGNEKITF
clone_1380_H11	clonotype2277H11	1	TRA:CAAMNYNQGKLIF
clone_1381_H11	clonotype2278H11	1	TRB:CASGQGTEVFF
clone_1382_H11	clonotype2279H11	1	TRB:CASGDAWAPLF
clone_1383_H11	clonotype227H11	1	TRB:CASSLTGGGERLFF;TRA:CAAEAFSNYNVLYF;TRA:CAASDNYGNEKITF
clone_1384_H11	clonotype2280H11	1	TRB:CASGDGVEQYF
clone_1385_H11	clonotype2281H11	1	TRB:CASGDYTEVFF
clone_1386_H11	clonotype2282H11	1	TRB:CASGAKDTQYF
clone_1387_H11	clonotype2283H11	1	TRB:CASSLTAEVFF
clone_1388_H11	clonotype2284H11	1	TRB:CASSDDAEQFF;TRA:CAAELGAGNKLTF
clone_1389_H11	clonotype2285H11	1	TRB:CASSLQDTQYF;TRA:CAADTNAYKVIF
clone_1390_H11	clonotype2286H11	1	TRB:CASSPRGEQYF;TRA:CATGTNAYKVIF
clone_1391_H11	clonotype2287H11	1	TRB:CASSGGYEQYF;TRA:CAAEREAYGNEKITF
clone_1392_H11	clonotype2288H11	1	TRB:CASGRWAEQFF;TRA:CAASPNTGNYKYVF
clone_1393_H11	clonotype2289H11	1	TRB:CASSLLYEQYF;TRA:CAASHDTNAYKVIF
clone_1394_H11	clonotype2290H11	1	TRB:CASGEARGYNSPLYF;TRA:CALSLTSGGNYKPTF
clone_1395_H11	clonotype2291H11	1	TRB:CASGDTDTQYF;TRA:CVVADRGSALGRLHF
clone_1396_H11	clonotype2292H11	1	TRB:CASGEGDTQYF;TRA:CALILPGTGSNRLTF
clone_1397_H11	clonotype2293H11	1	TRB:CASGEYERLFF;TRA:CAASASSGSWQLIF
clone_1398_H11	clonotype2294H11	1	TRB:CASSLEYEQYF;TRA:CAASVETGANTGKLTF
clone_1399_H11	clonotype2295H11	1	TRA:CAAGAWQGGSAKLIF
clone_1400_H11	clonotype2296H11	1	TRA:CAMREGPRAGGSNAKLTF
clone_1401_H11	clonotype2298H11	1	TRA:CAASRAGGYKVVF
clone_1402_H11	clonotype2299H11	1	TRA:CAARKQGTGSKLSF
clone_1403_H11	clonotype2300H11	1	TRA:CAASAGNTGKLTF
clone_1404_H11	clonotype2301H11	1	TRA:CAANLTGSGGKLTL
clone_1405_H11	clonotype2302H11	1	TRA:CAASASSGSWQLIF
clone_1406_H11	clonotype2304H11	1	TRB:CASGDSGNTLYF
clone_1407_H11	clonotype2305H11	1	TRB:CASGDGQEVQYF
clone_1408_H11	clonotype2306H11	1	TRB:CASGDGGGEQYF
clone_1409_H11	clonotype2307H11	1	TRB:CASGGDNPDYTF
clone_1410_H11	clonotype2309H11	1	TRB:CASSPGQDTQYF
clone_1411_H11	clonotype2310H11	1	TRB:CASSPGQDTQYF
clone_1412_H11	clonotype2311H11	1	TRB:CASSRHNSPLYF
clone_1413_H11	clonotype2312H11	1	TRB:CASSLNNQAPLF
clone_1414_H11	clonotype2313H11	1	TRB:CASSLTGVEQYF
clone_1415_H11	clonotype2314H11	1	TRB:CASWGQGGEVFF
clone_1416_H11	clonotype2315H11	1	TRB:CASSRNQDTQYF;TRA:CAAEGSNNRIFF
clone_1417_H11	clonotype2316H11	1	TRB:CASWHRENTLYF;TRA:CAAPDSNYQLIW
clone_1418_H11	clonotype2317H11	1	TRB:CASGDVRQGGNSDYTF;TRA:CAASDYNVLYF
clone_1419_H11	clonotype2318H11	1	TRB:CASEAGVPEVFF;TRA:CAMPATGGNNKLTF
clone_1420_H11	clonotype2319H11	1	TRB:CASGDPGSEVFF;TRA:CAIDPSSGSWQLIF
clone_1421_H11	clonotype2322H11	1	TRB:CASGDVGYEQYF;TRA:CAVSLDSNYQLIW
clone_1422_H11	clonotype2323H11	1	TRB:CASGVGTPNERLFF;TRB:CASSHPNTEVFF;TRA:CAAIGQGTGSKLSF;TRA:CAVASSGSWQLIF
clone_1423_H11	clonotype2324H11	1	TRB:CARTGGQDTQYF;TRA:CAASMNSGTYQRF;TRA:CALTHDSGYNKLTF
clone_1424_H11	clonotype2325H11	1	TRB:CASGDPGNTLYF;TRA:CAPNYGNEKITF
clone_1425_H11	clonotype2326H11	1	TRB:CASGDAQYEQYF;TRA:CALDQGGRALIF
clone_1426_H11	clonotype2327H11	1	TRB:CASGDSGYEQYF;TRA:CAALNNYAQGLTF
clone_1427_H11	clonotype2328H11	1	TRB:CASGDSNERLFF;TRA:CAVSESSGSWQLIF
clone_1428_H11	clonotype2329H11	1	TRB:CASSPQGDTLYF;TRB:CASSVRDRESAEQFF;TRA:CAVSAREGGYKLTF
clone_1429_H11	clonotype2330H11	1	TRB:CASSLEGAEQFF;TRB:CASSLEGWGVNQDTQYF;TRA:CALWELRNTNTGKLTF;TRA:CAMREGPRAGGSNAKLTF
clone_1430_H11	clonotype2332H11	1	TRA:CAASASGSFNKLTF
clone_1431_H11	clonotype2333H11	1	TRA:CAASANNAGAKLTF
clone_1432_H11	clonotype2334H11	1	TRA:CAASEGGTNTGKLTF
clone_1433_H11	clonotype2335H11	1	TRA:CAASEGGTNTGKLTF
clone_1434_H11	clonotype2336H11	1	TRB:CASGGGGYAEQFF
clone_1435_H11	clonotype2337H11	1	TRB:CASGDIWDQAPLF
clone_1436_H11	clonotype2338H11	1	TRB:CASGDLTDTEVFF
clone_1437_H11	clonotype233H11	1	TRA:CASHYNVLYF
clone_1438_H11	clonotype2340H11	1	TRB:CASGDDRNSDYTF
clone_1439_H11	clonotype2341H11	1	TRB:CASSHRANERLFF
clone_1440_H11	clonotype2342H11	1	TRB:CASSSGGGDTQYF
clone_1441_H11	clonotype2343H11	1	TRB:CASSPSGGYEQYF
clone_1442_H11	clonotype2344H11	1	TRB:CASSRDNYAEQFF
clone_1443_H11	clonotype2345H11	1	TRB:CASSTGTGAGVFF
clone_1444_H11	clonotype2347H11	1	TRB:CASSLGGATEVFF
clone_1445_H11	clonotype2348H11	1	TRB:CASSLLGYAEQFF
clone_1446_H11	clonotype2349H11	1	TRB:CASGDAKDTEVFF;TRA:CAAETGGYKVVF;TRA:CAASPDYSNNRLTL
clone_1447_H11	clonotype2350H11	1	TRB:CASSLEGNSDYTF;TRA:CATENNYAQGLTF
clone_1448_H11	clonotype2351H11	1	TRB:CASGDRAQNTLYF;TRA:CAASITGTYQRF;TRA:CAIPHNMGYKLTF
clone_1449_H11	clonotype2352H11	1	TRB:CASGDVDRYEQYF;TRA:CALEHSGYNKLTF
clone_1450_H11	clonotype2354H11	1	TRB:CASSRDRGQEQYF;TRA:CAAENSAGNKLTF;TRA:CAMEQRRGSALGRLHF
clone_1451_H11	clonotype2355H11	1	TRB:CASGTGGVYEQYF;TRA:CAVKHTNAYKVIF
clone_1452_H11	clonotype2356H11	1	TRB:CASGDAGLYEQYF;TRA:CAVSHYGNEKITF
clone_1453_H11	clonotype2357H11	1	TRB:CASSLSNTGQLYF;TRA:CAASEQDNNRIFF
clone_1454_H11	clonotype2358H11	1	TRB:CASSLGGPDTQYF;TRA:CAVSAANTNKVVF
clone_1455_H11	clonotype2359H11	1	TRB:CASGAAQGREQYF;TRA:CALETGNTGKLIF
clone_1456_H11	clonotype2360H11	1	TRB:CASSLGGNTEVFF;TRA:CALHDSGYNKLTF
clone_1457_H11	clonotype2361H11	1	TRB:CASGQGTGNTLYF;TRA:CAASASGSFNKLTF;TRA:CAAVQITGNTGKLIF
clone_1458_H11	clonotype2362H11	1	TRB:CASGPGPATEVFF;TRA:CAVSIRTQVVGQLTF
clone_1459_H11	clonotype2363H11	1	TRB:CASGAGTGVEQYF;TRA:CALGYNYAQGLTF
clone_1460_H11	clonotype2364H11	1	TRB:CASGGQNYAEQFF;TRA:CALSEGNQGKLIF
clone_1461_H11	clonotype2365H11	1	TRB:CASSLGRGNTLYF;TRA:CALGEGSALGRLHF
clone_1462_H11	clonotype2366H11	1	TRB:CASSLYTQDTQYF;TRA:CALEGYSNTNKVVF
clone_1463_H11	clonotype2367H11	1	TRB:CASGEGTDTEVFF;TRA:CAAQNTEGADRLTF
clone_1464_H11	clonotype2368H11	1	TRB:CASSLDWDSPLYF;TRA:CAMTINTGANTGKLTF
clone_1465_H11	clonotype2369H11	1	TRB:CASSLERGVEQYF;TRA:CAVSVAGNTGKLIF
clone_1466_H11	clonotype236H11	1	TRB:CAWSRYEQYF;TRA:CAAPNTGNYKYVF
clone_1467_H11	clonotype2371H11	1	TRB:CASGDRDTETLYF;TRA:CALGPHDSGYNKLTF;TRA:CAMREGRGGSWQLIF
clone_1468_H11	clonotype2372H11	1	TRB:CASGAGTEDTLYF;TRA:CALSEPGSFNKLTF
clone_1469_H11	clonotype2373H11	1	TRB:CASGDGLNTEVFF;TRA:CALSDSGGSNAKLTF
clone_1470_H11	clonotype2374H11	1	TRB:CASSPWTAFEQYF;TRA:CALRLNTGANTGKLTF
clone_1471_H11	clonotype2375H11	1	TRB:CASGDHGTSEVFF;TRA:CAAVNTGNYKYVF
clone_1472_H11	clonotype2376H11	1	TRB:CASGDWGQDTQYF;TRA:CAAVPTGNYKYVF
clone_1473_H11	clonotype2377H11	1	TRB:CASGDWGGATLYF;TRA:CAASRTGNYKYVF
clone_1474_H11	clonotype2378H11	1	TRB:CASGDVGEDTQYF;TRA:CAASASSGSWQLIF
clone_1475_H11	clonotype2379H11	1	TRB:CASSPRVVYEQYF;TRA:CAATQQGTGSKLSF
clone_1476_H11	clonotype237H11	1	TRB:CAWGDERLFF;TRA:CALGITGNTGKLIF
clone_1477_H11	clonotype2380H11	1	TRB:CASGGRDNSPLYF;TRA:CAASETASLGKLQF
clone_1478_H11	clonotype2381H11	1	TRB:CASSLEPEYEQYF;TRA:CAASWGVGDNSKLIW
clone_1479_H11	clonotype2382H11	1	TRA:CALWERGSFNKLTF
clone_1480_H11	clonotype2383H11	1	TRA:CALWELAGYQNFYF
clone_1481_H11	clonotype2384H11	1	TRB:CASGRDRGRDTQYF
clone_1482_H11	clonotype2385H11	1	TRB:CASGDWGNQDTQYF
clone_1483_H11	clonotype2388H11	1	TRB:CASGREGRNSPLYF
clone_1484_H11	clonotype2389H11	1	TRB:CASGREGRNSPLYF
clone_1485_H11	clonotype238H11	1	TRB:CARKEQYF;TRB:CASSQGTPGNTLYF;TRA:CAAEASSGSWQLIF;TRA:CAVMGYNQGKLIF
clone_1486_H11	clonotype2390H11	1	TRB:CASGERGNQDTQYF
clone_1487_H11	clonotype2391H11	1	TRB:CASGDRGVQNTLYF
clone_1488_H11	clonotype2392H11	1	TRB:CASGDDRGQDTQYF
clone_1489_H11	clonotype2393H11	1	TRB:CASGAGTGGYEQYF
clone_1490_H11	clonotype2394H11	1	TRB:CASSLQGNQDTQYF
clone_1491_H11	clonotype2395H11	1	TRB:CASSPQDNQDTQYF
clone_1492_H11	clonotype2396H11	1	TRB:CASSLRVNQDTQYF
clone_1493_H11	clonotype2397H11	1	TRB:CASSSDWDSYEQYF
clone_1494_H11	clonotype2398H11	1	TRB:CASSSDWDSYEQYF
clone_1495_H11	clonotype2399H11	1	TRB:CASSSDWDSYEQYF
clone_1496_H11	clonotype239H11	1	TRB:CGADSYEQYF;TRA:CAASETASLGKLQF
clone_1497_H11	clonotype2400H11	1	TRB:CASSLDWGYAEQFF
clone_1498_H11	clonotype2401H11	1	TRB:CASSRDGDGNTLYF
clone_1499_H11	clonotype2402H11	1	TRB:CASSRGGAAETLYF
clone_1500_H11	clonotype2403H11	1	TRB:CASSLDSSGNTLYF
clone_1501_H11	clonotype2404H11	1	TRB:CASSLWGGDAEQFF
clone_1502_H11	clonotype2405H11	1	TRB:CASSPLGNYAEQFF;TRA:CIVTDITGGYKVVF
clone_1503_H11	clonotype2406H11	1	TRB:CASSQTGGAYEQYF;TRA:CAISSSGQKLVF
clone_1504_H11	clonotype2407H11	1	TRB:CASGDRLGGLEQYF;TRA:CAAEPEGADRLTF
clone_1505_H11	clonotype2409H11	1	TRB:CASGDAGEGYEQYF;TRA:CALERNAGAKLTF
clone_1506_H11	clonotype240H11	1	TRB:CAWMGHEQYF;TRA:CAARSNSAGNKLTF
clone_1507_H11	clonotype2412H11	1	TRB:CASSRGGGSETLYF;TRA:CATVASSGSWQLIF
clone_1508_H11	clonotype2413H11	1	TRB:CASSLGLGGYEQYF;TRA:CAMVGDSNYQLIW
clone_1509_H11	clonotype2414H11	1	TRB:CASSLGQGGDTQYF;TRA:CATDWDYNQGKLIF
clone_1510_H11	clonotype2415H11	1	TRB:CASSLGGSSYEQYF;TRA:CAVRDLVGYKLTF
clone_1511_H11	clonotype2416H11	1	TRB:CASGDQDRGDTQYF;TRA:CAASRNTNTGKLTF;TRA:CAVSANTGKLTF
clone_1512_H11	clonotype2417H11	1	TRB:CASGDPGGAREQYF;TRA:CILRVGNQGGSAKLIF
clone_1513_H11	clonotype2418H11	1	TRB:CASGGGTTNTEVFF;TRA:CAAEATSGSWQLIF
clone_1514_H11	clonotype2419H11	1	TRB:CASSRQGANSDYTF;TRA:CAAERGSSGNKLIF;TRA:CAALNQGGSAKLIF
clone_1515_H11	clonotype241H11	1	TRB:CAWTGDTEVFF
clone_1516_H11	clonotype2420H11	1	TRB:CASSDYRSAETLYF;TRA:CAAERRSGSWQLIF
clone_1517_H11	clonotype2421H11	1	TRB:CASSPAASGNTLYF;TRA:CAVSISNNRIFF
clone_1518_H11	clonotype2422H11	1	TRB:CASGDRGLSYEQYF;TRA:CAAANYGNEKITF
clone_1519_H11	clonotype2423H11	1	TRB:CASGEGTSQNTLYF;TRA:CAAHNTNTGKLTF
clone_1520_H11	clonotype2424H11	1	TRB:CASGGGTGENTLYF;TRA:CAVSGSMGYKLTF;TRA:CVVGADSNNRIFF
clone_1521_H11	clonotype2425H11	1	TRB:CASGDPGGAGEQYF;TRA:CAASMGQGGRALIF
clone_1522_H11	clonotype2426H11	1	TRB:CASGGGTSNSDYTF;TRA:CALFSNTNKVVF;TRA:CAVRTGNYAQGLTF
clone_1523_H11	clonotype2427H11	1	TRB:CASPPGQSAETLYF;TRA:CALSYNSNYQLIW
clone_1524_H11	clonotype2428H11	1	TRB:CASSRDNNQDTQYF;TRA:CAVSLGTGGYKVVF
clone_1525_H11	clonotype2429H11	1	TRB:CASSPPGQQDTQYF;TRA:CAVRDRRGSALGRLHF
clone_1526_H11	clonotype2430H11	1	TRB:CASSPSGGRSDYTF;TRA:CALTVSGSFNKLTF
clone_1527_H11	clonotype2431H11	1	TRB:CASSLLGGLAEQFF;TRA:CAAYNTNTGKLTF
clone_1528_H11	clonotype2432H11	1	TRB:CASGGTGGNTEVFF;TRA:CALMNYGSSGNKLIF
clone_1529_H11	clonotype2433H11	1	TRB:CASSPRGPGNTLYF;TRA:CAVSMWAGNTGKLIF
clone_1530_H11	clonotype2435H11	1	TRB:CASSPTGWGNTLYF;TRA:CAVSMNQGGRALIF
clone_1531_H11	clonotype2437H11	1	TRB:CASSLEQGNSDYTF;TRA:CAPHSGYNKLTF
clone_1532_H11	clonotype2438H11	1	TRB:CASSLDWGTYEQYF;TRA:CVLSADYSNNRLTL
clone_1533_H11	clonotype2439H11	1	TRB:CASGDLGVQNTLYF;TRA:CAVSQSSGSWQLIF
clone_1534_H11	clonotype243H11	1	TRB:CASSTGDEQYF
clone_1535_H11	clonotype2440H11	1	TRB:CASSPDSSQNTLYF;TRA:CAVSRYNTNTGKLTF
clone_1536_H11	clonotype2441H11	1	TRB:CASGDRGLGTEQFF;TRA:CALSRNNYAQGLTF
clone_1537_H11	clonotype2442H11	1	TRB:CASGDGANQDTQYF;TRA:CAVSAQNYGSSGNKLIF
clone_1538_H11	clonotype2444H11	1	TRB:CASSRDRGLDTQYF;TRA:CAASEPLTSGGNYKPTF
clone_1539_H11	clonotype2445H11	1	TRB:CASGDRANNQAPLF;TRA:CAASDNNNAPRF
clone_1540_H11	clonotype2446H11	1	TRB:CASSLGLGGYAQYF;TRA:CAASQGGRALIF
clone_1541_H11	clonotype2447H11	1	TRB:CASGDDWGGYEQYF;TRA:CAGQQGTGSKLSF
clone_1542_H11	clonotype2448H11	1	TRB:CASSRDTANTEVFF;TRA:CAAGPNYNQGKLIF
clone_1543_H11	clonotype2449H11	1	TRB:CASSLEGAGAEQFF;TRA:CAASEDNSAGNKLTF
clone_1544_H11	clonotype244H11	1	TRB:CGARQNTEVFF
clone_1545_H11	clonotype2450H11	1	TRB:CASSHDWGGWKQYF;TRA:CAASSLPGTGSNRLTF
clone_1546_H11	clonotype2451H11	1	TRB:CASGEPGLGAEQFF;TRA:CALSDPEGADRLTF
clone_1547_H11	clonotype2452H11	1	TRA:CALLYGNEKITF
clone_1548_H11	clonotype2453H11	1	TRA:CAAKGLPGTGSNRLTF
clone_1549_H11	clonotype2454H11	1	TRB:CASGDPGTGNTEVFF
clone_1550_H11	clonotype2455H11	1	TRB:CASGETGGTGNTLYF
clone_1551_H11	clonotype2456H11	1	TRB:CASGDRWGAYAEQFF
clone_1552_H11	clonotype2457H11	1	TRB:CASGDLGASAETLYF
clone_1553_H11	clonotype2458H11	1	TRB:CASGDAGWGEDTQYF
clone_1554_H11	clonotype2459H11	1	TRB:CASGDARGYNSPLYF
clone_1555_H11	clonotype245H11	1	TRB:CGARTNTEVFF
clone_1556_H11	clonotype2460H11	1	TRB:CASGDARGYNSPLYF
clone_1557_H11	clonotype2461H11	1	TRB:CASGDAGLGEDEQYF
clone_1558_H11	clonotype2462H11	1	TRB:CASGDAWGFQDTQYF
clone_1559_H11	clonotype2463H11	1	TRB:CASGDASGGQDTQYF
clone_1560_H11	clonotype2464H11	1	TRB:CASGDAWTGDYEQYF
clone_1561_H11	clonotype2465H11	1	TRB:CASGDVGGDQDTQYF
clone_1562_H11	clonotype2466H11	1	TRB:CASSPDWDNYAEQFF
clone_1563_H11	clonotype2467H11	1	TRB:CASSRTGGDNQAPLF
clone_1564_H11	clonotype2468H11	1	TRB:CASSQGASGQNTLYF
clone_1565_H11	clonotype2469H11	1	TRB:CASSLGGAGAETLYF
clone_1566_H11	clonotype246H11	1	TRB:CASSGTGGQYF;TRA:CGGAGAKLTF
clone_1567_H11	clonotype2470H11	1	TRB:CASSLGQPYTGQLYF
clone_1568_H11	clonotype2472H11	1	TRB:CASSPSDRSQDTQYF
clone_1569_H11	clonotype2473H11	1	TRB:CASSRYWGSSYEQYF
clone_1570_H11	clonotype2474H11	1	TRB:CASSLGTGRGSDYTF
clone_1571_H11	clonotype2475H11	1	TRB:CASSLEGGPGNTLYF
clone_1572_H11	clonotype2476H11	1	TRB:CASSLGGFNQDTQYF
clone_1573_H11	clonotype2477H11	1	TRB:CASSLVGNNYAEQFF
clone_1574_H11	clonotype2478H11	1	TRB:CASSLDTGSQNTLYF;TRA:CAMTYAQGLTF
clone_1575_H11	clonotype2479H11	1	TRB:CASGDPGGNYAEQFF;TRA:CALERNAGAKLTF
clone_1576_H11	clonotype2480H11	1	TRB:CASSPDWGGSYEQYF;TRA:CAVRADMGYKLTF
clone_1577_H11	clonotype2481H11	1	TRB:CASSRQGASAETLYF;TRA:CAGMNYNQGKLIF
clone_1578_H11	clonotype2482H11	1	TRB:CASSLDMGDTGQLYF;TRA:CAAEGSGSWQLIF
clone_1579_H11	clonotype2483H11	1	TRB:CASSPGNISNERLFF;TRA:CALERSTNTGKLTF
clone_1580_H11	clonotype2484H11	1	TRB:CASGEGQGANTEVFF;TRA:CAASANSGTYQRF
clone_1581_H11	clonotype2485H11	1	TRB:CASGNRGLSNERLFF;TRA:CAVSNMGYKLTF
clone_1582_H11	clonotype2486H11	1	TRB:CASGDIGGAPDTQYF;TRA:CAVSLSNYNVLYF
clone_1583_H11	clonotype2487H11	1	TRB:CASGDAGGVSYEQYF;TRA:CAASSNMGYKLTF
clone_1584_H11	clonotype2488H11	1	TRB:CASSGGQANTGQLYF;TRA:CAMGLLSGSFNKLTF
clone_1585_H11	clonotype2489H11	1	TRB:CASSPPGQGNERLFF;TRA:CAASHTNTGKLTF
clone_1586_H11	clonotype248H11	1	TRB:CGARVRGEVFF;TRA:CALSVATSSGQKLVF;TRA:CATDARTGGYKVVF
clone_1587_H11	clonotype2490H11	1	TRB:CASGDWGANTGQLYF;TRA:CAVRLSGSFNKLTF
clone_1588_H11	clonotype2491H11	1	TRB:CASGESGGSAETLYF;TRA:CAMERPMSNYNVLYF
clone_1589_H11	clonotype2492H11	1	TRB:CASGDASGGYAEQFF;TRA:CALSDYNQGKLIF
clone_1590_H11	clonotype2493H11	1	TRB:CASSLDQGAGYTLYF;TRA:CVLSANTGNYKYVF
clone_1591_H11	clonotype2494H11	1	TRB:CASSPTGRGQDTQYF;TRA:CALLPSSFSKLVF
clone_1592_H11	clonotype2495H11	1	TRB:CASGERLGGRAEQFF;TRA:CALIRSGSWQLIF
clone_1593_H11	clonotype2496H11	1	TRB:CASGDADGYNSPLYF;TRA:CALSAPSNYQLIW
clone_1594_H11	clonotype2497H11	1	TRB:CASGAGTGSSYEQYF;TRA:CAVSASNSGTYQRF
clone_1595_H11	clonotype2499H11	1	TRB:CASGEGSVSQNTLYF;TRA:CVVGDRGSALGRLHF
clone_1596_H11	clonotype249H11	1	TRB:CASGGAEVFF;TRA:CALPPSNTNKVVF;TRA:CASLPSSSFSKLVF
clone_1597_H11	clonotype2500H11	1	TRB:CASGDDGGDQDTQYF;TRA:CAMREGYYANKMIF
clone_1598_H11	clonotype2501H11	1	TRB:CASGDAGGDSYEQYF;TRA:CVVGDRGSALGRLHF
clone_1599_H11	clonotype2502H11	1	TRB:CASGDAGQTNSDYTF;TRA:CAMEATASLGKLQF
clone_1600_H11	clonotype2503H11	1	TRB:CASGDGDISQNTLYF;TRA:CAMRESNMGYKLTF
clone_1601_H11	clonotype2504H11	1	TRB:CASGGPTDSGNTLYF;TRA:CALGGAAGNTGKLIF
clone_1602_H11	clonotype2505H11	1	TRB:CASSPGQGGTGQLYF;TRA:CAMEGQGGSAKLIF
clone_1603_H11	clonotype2506H11	1	TRB:CASSLRTTNYAEQFF;TRA:CALGDYSNNRLTL
clone_1604_H11	clonotype2507H11	1	TRB:CASSLGTNANSDYTF;TRA:CALSPRGGSALGRLHF
clone_1605_H11	clonotype2508H11	1	TRB:CASGELGGADAEQFF;TRA:CALGDRTGGLSGKLTF
clone_1606_H11	clonotype2509H11	1	TRB:CASSPGTTNNQAPLF;TRA:CAATGNTGKLIF
clone_1607_H11	clonotype250H11	1	TRB:CASSDKNTLYF;TRA:CALDRNNAGAKLTF
clone_1608_H11	clonotype2510H11	1	TRB:CASGEIRGYNSPLYF;TRA:CAAGPNQGGSAKLIF
clone_1609_H11	clonotype2511H11	1	TRB:CASGDAGGNYAEQFF;TRA:CAASEYSNNRLTL
clone_1610_H11	clonotype2512H11	1	TRB:CASGQTGGATGQLYF;TRA:CAASAGYNQGKLIF
clone_1611_H11	clonotype2513H11	1	TRB:CASGDTGGRAETLYF;TRA:CAASVNTGNYKYVF
clone_1612_H11	clonotype2514H11	1	TRB:CASGDGTGGSYEQYF;TRA:CAASAGGGSAKLIF
clone_1613_H11	clonotype2515H11	1	TRB:CASSPETNNQDTQYF;TRA:CAASESGGSNYKLTF
clone_1614_H11	clonotype2516H11	1	TRB:CASSLGQGSQNTLYF;TRA:CAASAPTGYQNFYF
clone_1615_H11	clonotype2517H11	1	TRB:CASGDAGGSQNTLYF;TRA:CAASDGTQVVGQLTF
clone_1616_H11	clonotype2518H11	1	TRB:CASSLDVNYNSPLYF;TRA:CALSARNAKLTF
clone_1617_H11	clonotype2519H11	1	TRA:CALTPNNNNAPRF
clone_1618_H11	clonotype251H11	1	TRB:CGARGDAEQFF;TRA:CAAGASSGSWQLIF
clone_1619_H11	clonotype2520H11	1	TRA:CALTPNNNNAPRF
clone_1620_H11	clonotype2521H11	1	TRA:CALTPNNNNAPRF
clone_1621_H11	clonotype2522H11	1	TRB:CASGDASGGSSYEQYF
clone_1622_H11	clonotype2523H11	1	TRB:CASGDAAGGRQDTQYF
clone_1623_H11	clonotype2526H11	1	TRB:CASGDSWGGAQNTLYF
clone_1624_H11	clonotype2527H11	1	TRB:CASGDAGGANQDTQYF;TRA:CAAEAYSSGQKLVF
clone_1625_H11	clonotype2528H11	1	TRB:CASGPGQKISNERLFF;TRA:CAVSISAGNKLTF
clone_1626_H11	clonotype2529H11	1	TRB:CASGDETGGSNSDYTF;TRA:CAALLTSGGNYKPTF
clone_1627_H11	clonotype252H11	1	TRB:CASSVQTEVFF;TRA:CATEGTGGYKVVF
clone_1628_H11	clonotype2530H11	1	TRB:CASSLGTGGFSYEQYF;TRA:CAVWTGGYKVVF
clone_1629_H11	clonotype2531H11	1	TRB:CASGDPGQGRKDTLYF;TRA:CAASPNTGYQNFYF
clone_1630_H11	clonotype2533H11	1	TRB:CASSRDRGISNERLFF;TRA:CATDWDYSNNRLTL
clone_1631_H11	clonotype2534H11	1	TRB:CASGDRLGLNQDTQYF;TRA:CALSLYAQGLTF
clone_1632_H11	clonotype2535H11	1	TRB:CASSLDHPGGGNTLYF;TRA:CALSMIAGGYKVVF
clone_1633_H11	clonotype2536H11	1	TRB:CASGDGRDRGGGEQYF;TRA:CVVGDRGSALGRLHF
clone_1634_H11	clonotype2538H11	1	TRB:CASGDAFGTGVGEQYF;TRA:CALGDLTTGGNNKLTF
clone_1635_H11	clonotype2539H11	1	TRB:CASGDATGGAQDTQYF;TRA:CAASASSGSWQLIF
clone_1636_H11	clonotype253H11	1	TRB:CASSYEQYF;TRB:CTCSAGDRGAEQFF;TRA:CALGGSWQLIF
clone_1637_H11	clonotype2540H11	1	TRB:CASSTGTDSYNSPLYF;TRA:CAASETNSAGNKLTF
clone_1638_H11	clonotype2541H11	1	TRA:CALSDDTGYQNFYF
clone_1639_H11	clonotype2542H11	1	TRB:CASSSGTGGATTGQLYF
clone_1640_H11	clonotype2543H11	1	TRB:CASGDALGLASSYEQYF;TRA:CALSSATSSGQKLVF
clone_1641_H11	clonotype2544H11	1	TRB:CASSLEAGTGNYAEQFF;TRA:CAASMPGGYKVVF
clone_1642_H11	clonotype2545H11	1	TRB:CASSPGLGGIDSYEQYF;TRA:CALSDFYNQGKLIF
clone_1643_H11	clonotype2546H11	1	TRB:CASSLPHLGGAAETLYF;TRA:CAMRENTGNYKYVF
clone_1644_H11	clonotype2547H11	1	TRB:CASSLGGLVSSAETLYF;TRA:CAASEPSGSWQLIF
clone_1645_H11	clonotype2548H11	1	TRB:CASGEISRDRDSGNTLYF
clone_1646_H11	clonotype2549H11	1	TRB:CASGAPLGTKISNERLFF;TRA:CVVGDRGSALGRLHF
clone_1647_H11	clonotype254H11	1	TRB:CAWSGGGEQYF;TRA:CAASYGSSGNKLIF
clone_1648_H11	clonotype255H11	1	TRB:CASSGRYEQYF;TRA:CAASDSNNRIFF
clone_1649_H11	clonotype256H11	1	TRB:CASKQGTEVFF;TRB:CASSPGTENTLYF;TRA:CAASNTGYQNFYF
clone_1650_H11	clonotype257H11	1	TRB:CASSETGGSQNTLYF;TRB:CAWSPGDEQYF;TRA:CALGGRESNNRIFF
clone_1651_H11	clonotype258H11	1	TRB:CASSDGTGGSF;TRA:CVVGDRGSALGRLHF
clone_1652_H11	clonotype259H11	1	TRB:CASSDTAEVFF;TRA:CAASRNSNNRIFF
clone_1653_H11	clonotype260H11	1	TRB:CGARTHTEVFF;TRA:CAARQQGTGSKLSF
clone_1654_H11	clonotype261H11	1	TRB:CAWSLGDTQYF;TRA:CAAGAMATGGNNKLTF
clone_1655_H11	clonotype263H11	1	TRA:CAIDPNTNKVVF
clone_1656_H11	clonotype264H11	1	TRB:CASSLSEQYF
clone_1657_H11	clonotype265H11	1	TRA:CATGGTNAYKVIF
clone_1658_H11	clonotype266H11	1	TRA:CAGDTNAYKVIF
clone_1659_H11	clonotype267H11	1	TRB:CAWSQGPQAPLF
clone_1660_H11	clonotype269H11	1	TRA:CAVSSNTNKVVF
clone_1661_H11	clonotype270H11	1	TRB:CASSLDKPL
clone_1662_H11	clonotype271H11	1	TRA:CILRLQGGSAKLIF
clone_1663_H11	clonotype272H11	1	TRA:CILRANTGYQNFYF
clone_1664_H11	clonotype273H11	1	TRA:CILRVRGGSAKLIF
clone_1665_H11	clonotype274H11	1	TRA:CILRVSNNNNAPRF
clone_1666_H11	clonotype275H11	1	TRB:CASSDIYEQYF
clone_1667_H11	clonotype276H11	1	TRB:CASSGGGEQYF
clone_1668_H11	clonotype277H11	1	TRB:CASRDSAETLYF
clone_1669_H11	clonotype278H11	1	TRB:CASRDSAETLYF
clone_1670_H11	clonotype279H11	1	TRB:CASRDSAETLYF
clone_1671_H11	clonotype280H11	1	TRB:CASRGQSYEQYF
clone_1672_H11	clonotype281H11	1	TRB:CASSDLGGILYF
clone_1673_H11	clonotype282H11	1	TRB:CASSDPTYEQYF
clone_1674_H11	clonotype283H11	1	TRB:CASSGLTAEQYF
clone_1675_H11	clonotype284H11	1	TRB:CASSVNTGQLYF
clone_1676_H11	clonotype285H11	1	TRB:CASSQNTLYF
clone_1677_H11	clonotype286H11	1	TRB:CSSRTVYAEQFF
clone_1678_H11	clonotype287H11	1	TRB:CGATGQYAEQFF
clone_1679_H11	clonotype288H11	1	TRB:CGANRDRNTLYF
clone_1680_H11	clonotype289H11	1	TRB:CGATSGGTEVFF
clone_1681_H11	clonotype290H11	1	TRB:CGARYSGNTLYF
clone_1682_H11	clonotype293H11	1	TRB:CGARGTGTEVFF
clone_1683_H11	clonotype294H11	1	TRB:CGASGQNQAPLF
clone_1684_H11	clonotype295H11	1	TRB:CASTRGTGQLYF;TRA:CAPYGNEKITF
clone_1685_H11	clonotype296H11	1	TRB:CGARDRQDTQYF;TRA:CAASETNSAGNKLTF;TRA:CVFPQGGRALIF
clone_1686_H11	clonotype297H11	1	TRB:CGAGTSQNTLYF;TRA:CAVYQGGRALIF
clone_1687_H11	clonotype298H11	1	TRB:CAWSPVNSDYTF;TRA:CAAETSSGQKLVF;TRA:CALSNMGYKLTF
clone_1688_H11	clonotype299H11	1	TRB:CASSDRGYTLYF;TRB:CASSLEREGYNSPLYF;TRA:CAAEAGNNNAPRF
clone_1689_H11	clonotype300H11	1	TRB:CSSTGNQDTQYF;TRA:CAAEAHMGYKLTF
clone_1690_H11	clonotype301H11	1	TRB:CGANRDRHTQYF;TRA:CAMTNSAGNKLTF
clone_1691_H11	clonotype303H11	1	TRB:CASSEGTEVFF;TRA:CAIDQNSAGNKLTF
clone_1692_H11	clonotype304H11	1	TRB:CASSEPGQQYF;TRA:CAARNSGGSNYKLTF
clone_1693_H11	clonotype306H11	1	TRB:CASSGLDTQYF;TRA:CATDATGNYKYVF
clone_1694_H11	clonotype307H11	1	TRB:CASSEGFSDYTF;TRA:CAARRNSNNRIFF
clone_1695_H11	clonotype308H11	1	TRB:CASSDASNTQYF;TRA:CAASENSNYQLIW
clone_1696_H11	clonotype309H11	1	TRB:CGARSYNSPLYF;TRA:CALSRNSNNRIFF
clone_1697_H11	clonotype310H11	1	TRB:CASSLRRNTGQLYF;TRB:CAWRWGPYEQYF;TRA:CALEGGGSAKLIF;TRA:CAVSSDRGSALGRLHF
clone_1698_H11	clonotype311H11	1	TRB:CAWSLDKYEQYF;TRA:CAASRSTNTGKLTF
clone_1699_H11	clonotype312H11	1	TRB:CASSDPSYEQYF;TRA:CAVGTGANTGKLTF
clone_1700_H11	clonotype313H11	1	TRB:CASSLGGDTQYF;TRB:CGARLGGWEQYF;TRA:CAASMGGNTGKLIF
clone_1701_H11	clonotype315H11	1	TRB:CASTPTGDEQYF;TRA:CAARSSGSWQLIF
clone_1702_H11	clonotype316H11	1	TRB:CASSDGNQAPLF;TRA:CAARLPGTGSNRLTF
clone_1703_H11	clonotype317H11	1	TRB:CGARRGNTEVFF;TRA:CAASERVGDNSKLIW
clone_1704_H11	clonotype318H11	1	TRB:CGARGGGNTLYF;TRA:CAASDSNNRIFF;TRA:CAVSISGGSNAKLTF
clone_1705_H11	clonotype319H11	1	TRB:CGARVQENTLYF;TRA:CAVSSYQGGRALIF
clone_1706_H11	clonotype320H11	1	TRB:CAWSLADSDYTF;TRA:CAASIDTGYQNFYF
clone_1707_H11	clonotype321H11	1	TRB:CASRDSAETLYF;TRA:CAVENQGGSAKLIF
clone_1708_H11	clonotype322H11	1	TRB:CASSQDNSPLYF;TRA:CAASGTQVVGQLTF
clone_1709_H11	clonotype323H11	1	TRB:CASGEPYEQYF;TRA:CALGAMNYNQGKLIF
clone_1710_H11	clonotype324H11	1	TRB:CAWSRQNSDYTF;TRA:CALGDQNSGTYQRF
clone_1711_H11	clonotype325H11	1	TRB:CGARTGKTDYTF;TRA:CALGDRGSNNRIFF
clone_1712_H11	clonotype326H11	1	TRB:CGARDNQDTQYF;TRA:CALGGMQQGTGSKLSF
clone_1713_H11	clonotype327H11	1	TRB:CGAGQNTGQLYF;TRA:CAARLNYGSSGNKLIF;TRA:CVVGDGLPGTGSNRLTF
clone_1714_H11	clonotype328H11	1	TRB:CAWIELGGRMYF;TRA:CAASPNTNKVVF
clone_1715_H11	clonotype329H11	1	TRB:CASGPRDEQYF;TRA:CAPNNAGAKLTF
clone_1716_H11	clonotype330H11	1	TRB:CASSGQYEQYF;TRA:CAASDYSNNRLTL
clone_1717_H11	clonotype331H11	1	TRB:CASSAAGSDYTF;TRA:CAAGVTGSGGKLTL
clone_1718_H11	clonotype332H11	1	TRB:CGARGSAETLYF;TRA:CAANYQGGRALIF
clone_1719_H11	clonotype333H11	1	TRB:CASKQGGAEQFF;TRA:CAASGPGGNYKPTF
clone_1720_H11	clonotype334H11	1	TRB:CGARDWVYEQYF;TRA:CAARGTGANTGKLTF
clone_1721_H11	clonotype335H11	1	TRB:CAWSHRGYEQYF;TRA:CAASDPGTGSNRLTF
clone_1722_H11	clonotype336H11	1	TRB:CASGWGTEVFF;TRA:CALRITGSGGKLTL
clone_1723_H11	clonotype337H11	1	TRA:CAVDNNNAPRF
clone_1724_H11	clonotype338H11	1	TRA:CAIDRHNTGKLTF
clone_1725_H11	clonotype340H11	1	TRA:CAFLSGSFNKLTF
clone_1726_H11	clonotype341H11	1	TRB:CASSFRTEVFF
clone_1727_H11	clonotype342H11	1	TRB:CASRDRGPEVFF
clone_1728_H11	clonotype343H11	1	TRB:CASRDRGPEVFF
clone_1729_H11	clonotype344H11	1	TRB:CASSQEHSDYTF
clone_1730_H11	clonotype345H11	1	TRB:CASSQVGAEVFF
clone_1731_H11	clonotype346H11	1	TRB:CASSHQNTEVFF
clone_1732_H11	clonotype347H11	1	TRB:CASSHLGSEQYF
clone_1733_H11	clonotype348H11	1	TRA:CATDYDTNAYKVIF
clone_1734_H11	clonotype349H11	1	TRA:CAAEADSNYQLIW
clone_1735_H11	clonotype350H11	1	TRA:CAAEAGSGGKLTL
clone_1736_H11	clonotype351H11	1	TRA:CAVRNNAGAKLTF
clone_1737_H11	clonotype352H11	1	TRA:CAVRNNAGAKLTF
clone_1738_H11	clonotype355H11	1	TRB:CAQSGTNNSPLYF
clone_1739_H11	clonotype356H11	1	TRB:CAWKPVPNERLFF
clone_1740_H11	clonotype357H11	1	TRB:CAWTNSYNSPLYF
clone_1741_H11	clonotype358H11	1	TRB:CAWRTKPNTEVFF
clone_1742_H11	clonotype359H11	1	TRB:CAWRDRGGERLFF
clone_1743_H11	clonotype361H11	1	TRB:CAWSLDRNSPLYF
clone_1744_H11	clonotype362H11	1	TRB:CAWSLPGQDTQYF
clone_1745_H11	clonotype364H11	1	TRB:CAWSLGGRGEQYF
clone_1746_H11	clonotype365H11	1	TRB:CASSKDYEQYF
clone_1747_H11	clonotype366H11	1	TRB:CASSKDYEQYF
clone_1748_H11	clonotype367H11	1	TRB:CASSPSQNTLYF
clone_1749_H11	clonotype368H11	1	TRB:CASSDYSYEQYF
clone_1750_H11	clonotype369H11	1	TRB:CASSGSQDTQYF
clone_1751_H11	clonotype370H11	1	TRB:CASGDREAEVFF
clone_1752_H11	clonotype371H11	1	TRB:CASGQGGDEQYF
clone_1753_H11	clonotype373H11	1	TRB:CASSDNRGAEQFF
clone_1754_H11	clonotype374H11	1	TRB:CASSVGAYAEQFF
clone_1755_H11	clonotype375H11	1	TRB:CASSVGGQDTQYF
clone_1756_H11	clonotype376H11	1	TRB:CASSQNTEVFF
clone_1757_H11	clonotype377H11	1	TRB:CASSPRDTQYF
clone_1758_H11	clonotype378H11	1	TRB:CASWGLAALYF
clone_1759_H11	clonotype379H11	1	TRB:CSSRAGGQDTQYF
clone_1760_H11	clonotype380H11	1	TRB:CSSRAGGQDTQYF
clone_1761_H11	clonotype381H11	1	TRB:CSSRGQDAERLFF
clone_1762_H11	clonotype382H11	1	TRB:CGAYWASAETLYF
clone_1763_H11	clonotype383H11	1	TRB:CGARQGTNERLFF
clone_1764_H11	clonotype384H11	1	TRB:CGARTVSNERLFF
clone_1765_H11	clonotype385H11	1	TRB:CGARRTVQDTQYF
clone_1766_H11	clonotype386H11	1	TRB:CGAREGWGNTLYF
clone_1767_H11	clonotype387H11	1	TRB:CGASPGRGNTLYF
clone_1768_H11	clonotype388H11	1	TRB:CGALTGPNTEVFF
clone_1769_H11	clonotype389H11	1	TRB:CASSGREQDTQYF;TRB:CASSTTGGSYEQYF;TRA:CATRNMGYKLTF
clone_1770_H11	clonotype390H11	1	TRB:CAWRQFSNERLFF;TRB:CTCSAVNWGGRDF;TRA:CAVGGSNAKLTF
clone_1771_H11	clonotype391H11	1	TRB:CAAGTGNSDYTF;TRA:CALSDRWNNNNAPRF;TRA:CILRVSGGNEKITF
clone_1772_H11	clonotype392H11	1	TRB:CASSDSSAETLYF;TRA:CAVSYNRIFF
clone_1773_H11	clonotype393H11	1	TRB:CASSDAVGGGLYF;TRB:CASSQINERLFF;TRA:CAAGARQQGTGSKLSF;TRA:CAALNNNNAPRF
clone_1774_H11	clonotype394H11	1	TRB:CASGGQDTQYF;TRA:CAAEDQGGRALIF
clone_1775_H11	clonotype396H11	1	TRB:CASSQAGYEQYF;TRA:CAPRGYNQGKLIF
clone_1776_H11	clonotype397H11	1	TRB:CASSAGGAYEQYF;TRA:CILRVNQGTGSKLSF
clone_1777_H11	clonotype398H11	1	TRB:CASSGTGADTQYF;TRA:CAMEDTNAYKVIF
clone_1778_H11	clonotype399H11	1	TRB:CASSFTGSAEQFF;TRB:CASSIQDTQYF;TRA:CAASPSNTNKVVF;TRA:CAPITGNTGKLIF
clone_1779_H11	clonotype400H11	1	TRB:CGAKTGSQNTLYF;TRA:CAMGTGSGGKLTL
clone_1780_H11	clonotype401H11	1	TRB:CACSPWSSYEQYF;TRA:CAIDQGTGGYKVVF
clone_1781_H11	clonotype402H11	1	TRB:CASSGQGAEQFF;TRA:CAAYYNVLYF
clone_1782_H11	clonotype403H11	1	TRB:CASSVGQNTLYF;TRA:CAMKSNYNVLYF
clone_1783_H11	clonotype404H11	1	TRB:CASTGGYNSPLYF;TRA:CASDTGNYKYVF
clone_1784_H11	clonotype405H11	1	TRB:CASSFQDTQYF;TRA:CAARKGADRLTF
clone_1785_H11	clonotype406H11	1	TRB:CGASSGYNSPLYF;TRA:CALERVYGNEKITF
clone_1786_H11	clonotype407H11	1	TRB:CASSVGGNYAEQFF;TRB:CGARDRDGERLFF;TRA:CALERSGNTGKLIF
clone_1787_H11	clonotype408H11	1	TRB:CAWNPGQGALVFF;TRA:CALSDKYANKMIF
clone_1788_H11	clonotype409H11	1	TRB:CASSDDGDEQYF;TRA:CATDRSGSWQLIF
clone_1789_H11	clonotype410H11	1	TRB:CASRDSGNTLYF;TRA:CAVKNTNTGKLTF
clone_1790_H11	clonotype411H11	1	TRB:CASSDGPNSDYTF;TRA:CAARRNAGAKLTF;TRA:CAMRVNYNQGKLIF
clone_1791_H11	clonotype412H11	1	TRB:CASSAGDYAEQFF;TRA:CAVMDTNTGKLTF
clone_1792_H11	clonotype413H11	1	TRB:CSSRGGPNTEVFF;TRA:CAVSMRGADRLTF
clone_1793_H11	clonotype414H11	1	TRB:CGARRDRVETLYF;TRA:CALSGYNQGKLIF
clone_1794_H11	clonotype415H11	1	TRB:CGAITGGLSEQYF;TRA:CATDDTNAYKVIF
clone_1795_H11	clonotype416H11	1	TRB:CGGGGDGQLYF;TRA:CAVSMPGSGGKLTL
clone_1796_H11	clonotype417H11	1	TRB:CAWSHGRGTEVFF;TRA:CAAEFNTGANTGKLTF
clone_1797_H11	clonotype418H11	1	TRB:CAWSLPGGYEQYF;TRA:CALSDGSSGNKLIF
clone_1798_H11	clonotype419H11	1	TRB:CAWSLPEGYEQYF;TRA:CAASSMSNYNVLYF
clone_1799_H11	clonotype420H11	1	TRB:CAWSLGADTEVFF;TRA:CAASDMSNYNVLYF;TRA:CATQAYQGGRALIF
clone_1800_H11	clonotype421H11	1	TRB:CASSEQVAEQFF;TRA:CATDRGSALGRLHF
clone_1801_H11	clonotype422H11	1	TRB:CASKKGGDERLFF;TRA:CAARTNTGNYKYVF
clone_1802_H11	clonotype423H11	1	TRB:CASRQGRQDTQYF;TRA:CVPHANSGTYQRF
clone_1803_H11	clonotype424H11	1	TRB:CASSQNTEVFF;TRB:CAWSWGGSSYEQYF;TRA:CAVSAGNYKYVF
clone_1804_H11	clonotype425H11	1	TRB:CSSREGIAETLYF;TRA:CAASVNYSNNRLTL
clone_1805_H11	clonotype426H11	1	TRB:CGARGSANTEVFF;TRA:CAVNYNQGKLIF
clone_1806_H11	clonotype428H11	1	TRB:CAWSPPNQDTQYF;TRA:CALGRASSGSWQLIF
clone_1807_H11	clonotype429H11	1	TRB:CAWSLGQNTEVFF;TRA:CAAFYSNNRLTL;TRA:CAASTSSGQKLVF
clone_1808_H11	clonotype430H11	1	TRB:CAWGRDSNERLFF;TRA:CAVSPYNTNTGKLTF
clone_1809_H11	clonotype431H11	1	TRB:CASSEGSYEQYF;TRB:CGARDLDRDGNSPLYF;TRA:CAQGYNQGKLIF
clone_1810_H11	clonotype432H11	1	TRB:CASSDTGSPLYF;TRA:CAVSMNYNQGKLIF
clone_1811_H11	clonotype433H11	1	TRB:CASGGSGNTLYF;TRA:CVLGPDTNAYKVIF
clone_1812_H11	clonotype434H11	1	TRB:CGARGGVSYEQYF;TRA:CAASLGAGAKLTF
clone_1813_H11	clonotype435H11	1	TRB:CGARDWSSYEQYF;TRA:CAVRSSNTNKVVF
clone_1814_H11	clonotype436H11	1	TRB:CGASQGANTEVFF;TRA:CALGDPNTNKVVF
clone_1815_H11	clonotype437H11	1	TRB:CGASPGDQDTQYF;TRA:CALGNTGYQNFYF
clone_1816_H11	clonotype438H11	1	TRB:CGAGTGYAETLYF;TRA:CAMERSNSAGNKLTF;TRA:CAMREGPTSSGQKLVF
clone_1817_H11	clonotype439H11	1	TRB:CGVLTGVYAEQFF;TRA:CALGRTGGYKVVF
clone_1818_H11	clonotype440H11	1	TRB:CASRDAYEQYF;TRA:CAASVGNYAQGLTF
clone_1819_H11	clonotype441H11	1	TRB:CASSRTGYEQYF;TRA:CALSDRNSNNRIFF
clone_1820_H11	clonotype442H11	1	TRB:CARGTGRDSDYTF;TRB:CASTDGTEVFF;TRA:CALSASAGNKLTF
clone_1821_H11	clonotype443H11	1	TRB:CASSMTDYEQYF;TRA:CAASANTGNYKYVF
clone_1822_H11	clonotype444H11	1	TRB:CASSERQYEQYF;TRA:CAASSTGGNNKLTF
clone_1823_H11	clonotype445H11	1	TRB:CASRGWEQYF;TRB:CASSDTGQAPLF;TRA:CAVSENTNAYKVIF
clone_1824_H11	clonotype446H11	1	TRB:CASGDKSSDYTF;TRA:CAVSDDTGANTGKLTF
clone_1825_H11	clonotype447H11	1	TRB:CASSEAGCQAPLF;TRA:CAASRGGGNNKLTF
clone_1826_H11	clonotype449H11	1	TRB:CGARRGSSYEQYF;TRA:CALSAEGGRALIF
clone_1827_H11	clonotype450H11	1	TRB:CGARDVTQDTQYF;TRA:CALRGQGGRALIF
clone_1828_H11	clonotype452H11	1	TRB:CASSSTETLYF;TRA:CALSRYGSSGNKLIF
clone_1829_H11	clonotype453H11	1	TRB:CASGAHRANTEVFF;TRB:CASSRVYEQYF;TRA:CALSAANYNQGKLIF;TRA:CAMREGFGSAGNKLTF
clone_1830_H11	clonotype454H11	1	TRB:CASKPIQDTQYF;TRA:CALSDLAGSFNKLTF
clone_1831_H11	clonotype455H11	1	TRB:CASSENNSGNTLYF;TRB:CGARLGSQNTLYF;TRA:CALTRNNNNAPRF
clone_1832_H11	clonotype456H11	1	TRB:CGARDRDYAEQFF;TRA:CAMREDYGNEKITF
clone_1833_H11	clonotype457H11	1	TRB:CASSDPGYEQYF;TRA:CAMRGMSNYNVLYF
clone_1834_H11	clonotype458H11	1	TRB:CASGTGDHERLFF;TRA:CAASALTNSAGNKLTF
clone_1835_H11	clonotype459H11	1	TRB:CGAPGTGNTEVFF;TRA:CAMGGAYTGYQNFYF
clone_1836_H11	clonotype460H11	1	TRB:CASGEGGKDTQYF;TRB:CAWGDRVDTEVFF;TRA:CALSSRNSGGSNAKLTF
clone_1837_H11	clonotype461H11	1	TRB:CASSEGNSDYTF;TRA:CAAANNNNAPRF
clone_1838_H11	clonotype462H11	1	TRB:CASRRTGGREQYF;TRA:CAATSNNRIFF
clone_1839_H11	clonotype463H11	1	TRB:CASSEVAETLYF;TRA:CAATASLGKLQF
clone_1840_H11	clonotype464H11	1	TRB:CAWMGGGAETLYF;TRA:CAARGAGSGGKLTL
clone_1841_H11	clonotype465H11	1	TRB:CASKGRGNTLYF;TRA:CAAHNTNTGKLTF
clone_1842_H11	clonotype466H11	1	TRB:CASSSGGTETLYF;TRA:CAASAPSGSWQLIF
clone_1843_H11	clonotype468H11	1	TRB:CAQGAAETLYF;TRA:CAARLPGTGSNRLTF
clone_1844_H11	clonotype469H11	1	TRB:CASSPGGGERLFF;TRA:CAASPTGFASALTF
clone_1845_H11	clonotype470H11	1	TRB:CASSQEGEQYF;TRA:CAASASSGSWQLIF
clone_1846_H11	clonotype471H11	1	TRB:CSAGTGRNTEVFF;TRA:CAASGMSNYNVLYF
clone_1847_H11	clonotype473H11	1	TRB:CARPGQGHSDYTF;TRB:CAWSSGAGNTLYF;TRA:CAASGIGNNYAQGLTF
clone_1848_H11	clonotype474H11	1	TRB:CAWSQTGQDTQYF;TRA:CALSEQGTGSKLSF
clone_1849_H11	clonotype475H11	1	TRB:CASSLRSQNTLYF;TRA:CALILNTGYQNFYF
clone_1850_H11	clonotype476H11	1	TRB:CASSSGWDTQYF;TRA:CALRGTPGTGSNRLTF
clone_1851_H11	clonotype477H11	1	TRA:CAVKDSNYQLIW
clone_1852_H11	clonotype478H11	1	TRA:CAVKDSNYQLIW
clone_1853_H11	clonotype479H11	1	TRA:CAATSNTNKVVF
clone_1854_H11	clonotype480H11	1	TRA:CAASKGGRALIF
clone_1855_H11	clonotype481H11	1	TRA:CALERRSNTNKVVF
clone_1856_H11	clonotype482H11	1	TRA:CAMDSNTGYQNFYF
clone_1857_H11	clonotype484H11	1	TRB:CASSPGQTEVFF
clone_1858_H11	clonotype487H11	1	TRB:CASSQANTEVFF
clone_1859_H11	clonotype488H11	1	TRB:CASSARAAEQFF
clone_1860_H11	clonotype489H11	1	TRB:CASSLTGDEQYF
clone_1861_H11	clonotype490H11	1	TRB:CASSQDRAERLFF
clone_1862_H11	clonotype491H11	1	TRB:CASSQEGFYEQYF
clone_1863_H11	clonotype492H11	1	TRB:CASSQAGTHEQYF
clone_1864_H11	clonotype493H11	1	TRB:CASSQAGGYEQYF
clone_1865_H11	clonotype494H11	1	TRB:CASSQAGGYEQYF
clone_1866_H11	clonotype495H11	1	TRB:CASSHRGEDTQYF
clone_1867_H11	clonotype496H11	1	TRB:CASSPRDLDTQYF
clone_1868_H11	clonotype499H11	1	TRB:CASSRQGRDEQYF
clone_1869_H11	clonotype501H11	1	TRB:CASRDWGENEQYF
clone_1870_H11	clonotype502H11	1	TRA:CAAEANNYAQGLTF
clone_1871_H11	clonotype504H11	1	TRA:CAAEAFSNYNVLYF
clone_1872_H11	clonotype507H11	1	TRA:CAAERGSSGNKLIF
clone_1873_H11	clonotype508H11	1	TRA:CAAERGSSGNKLIF
clone_1874_H11	clonotype509H11	1	TRA:CAAERGSSGNKLIF
clone_1875_H11	clonotype510H11	1	TRA:CAAERGSSGNKLIF
clone_1876_H11	clonotype511H11	1	TRA:CAAEAATGYQNFYF
clone_1877_H11	clonotype512H11	1	TRA:CALNNYAQGLTF
clone_1878_H11	clonotype513H11	1	TRA:CAGTGNTGKLIF
clone_1879_H11	clonotype514H11	1	TRA:CAGTGNTGKLIF
clone_1880_H11	clonotype516H11	1	TRA:CAVRDGTNTGKLTF
clone_1881_H11	clonotype519H11	1	TRA:CAVRDGTNTGKLTF
clone_1882_H11	clonotype520H11	1	TRB:CAWSHRGSQNTLYF
clone_1883_H11	clonotype521H11	1	TRB:CAGPGQGTNERLFF
clone_1884_H11	clonotype522H11	1	TRB:CAWSPAGRYAEQFF
clone_1885_H11	clonotype523H11	1	TRB:CAWSRDRANSDYTF
clone_1886_H11	clonotype524H11	1	TRB:CAWSRGQGNTEVFF
clone_1887_H11	clonotype526H11	1	TRB:CAWSLTGTGNTLYF
clone_1888_H11	clonotype527H11	1	TRB:CAWSLGASQNTLYF
clone_1889_H11	clonotype528H11	1	TRB:CAWSPQVSNERLFF
clone_1890_H11	clonotype530H11	1	TRB:CAWSPGTGGYEQYF
clone_1891_H11	clonotype531H11	1	TRB:CAWSPWGIDSDYTF
clone_1892_H11	clonotype532H11	1	TRB:CAWSLQGSNTEVFF
clone_1893_H11	clonotype533H11	1	TRB:CAWSLDRNYAEQFF
clone_1894_H11	clonotype534H11	1	TRB:CAWSLGEGYAEQFF
clone_1895_H11	clonotype535H11	1	TRB:CAWSLVSTNSDYTF
clone_1896_H11	clonotype536H11	1	TRB:CAWSLVVANERLFF
clone_1897_H11	clonotype537H11	1	TRB:CAWSLGTNNSPLYF
clone_1898_H11	clonotype538H11	1	TRB:CAWSLSWGEAEQFF
clone_1899_H11	clonotype539H11	1	TRB:CAWSLGGRDAEQFF
clone_1900_H11	clonotype540H11	1	TRB:CAWSLGTGDTEVFF
clone_1901_H11	clonotype541H11	1	TRB:CAWSGLGGSYEQYF
clone_1902_H11	clonotype542H11	1	TRB:CASRQGFTQYF
clone_1903_H11	clonotype543H11	1	TRB:CASSSEDTQYF
clone_1904_H11	clonotype544H11	1	TRB:CASSLDYEQYF
clone_1905_H11	clonotype545H11	1	TRB:CASSFTVEQYF
clone_1906_H11	clonotype546H11	1	TRB:CASRGATEVFF
clone_1907_H11	clonotype547H11	1	TRB:CASSLWDEQYF
clone_1908_H11	clonotype548H11	1	TRB:CASSLGTGQYF
clone_1909_H11	clonotype549H11	1	TRB:CASSNNERLFF
clone_1910_H11	clonotype550H11	1	TRB:CASSHYNNQAPLF
clone_1911_H11	clonotype552H11	1	TRB:CASSEQSNTEVFF
clone_1912_H11	clonotype553H11	1	TRB:CASSDHRDTEVFF
clone_1913_H11	clonotype554H11	1	TRB:CASSDAGNSPLYF
clone_1914_H11	clonotype555H11	1	TRB:CASGDRSQNTLYF
clone_1915_H11	clonotype556H11	1	TRB:CASGETGGDTQYF
clone_1916_H11	clonotype557H11	1	TRB:CASKNRGHGNTLYF
clone_1917_H11	clonotype558H11	1	TRB:CASSRQGTNERLFF
clone_1918_H11	clonotype559H11	1	TRB:CASSPGTGKTEVFF
clone_1919_H11	clonotype560H11	1	TRB:CASSDRDSGNTLYF
clone_1920_H11	clonotype561H11	1	TRB:CASSDGGANTEVFF
clone_1921_H11	clonotype563H11	1	TRB:CASSDPPDRDEQYF
clone_1922_H11	clonotype564H11	1	TRB:CASSDAAGNTEVFF
clone_1923_H11	clonotype565H11	1	TRB:CASSVRGGQNTLYF
clone_1924_H11	clonotype566H11	1	TRB:CASSVGGSAETLYF
clone_1925_H11	clonotype569H11	1	TRB:CASSQTGGTLYF
clone_1926_H11	clonotype570H11	1	TRB:CASSRSSYEQYF
clone_1927_H11	clonotype571H11	1	TRB:CASSYRNSPLYF
clone_1928_H11	clonotype574H11	1	TRB:CASSSWYAEQFF
clone_1929_H11	clonotype575H11	1	TRB:CGASPGHYNSPLYF
clone_1930_H11	clonotype576H11	1	TRB:CGARKGAYNSPLYF
clone_1931_H11	clonotype577H11	1	TRB:CGARDWGNTGQLYF
clone_1932_H11	clonotype578H11	1	TRB:CGARDWGSSYEQYF
clone_1933_H11	clonotype579H11	1	TRB:CGARDPGSGNTLYF
clone_1934_H11	clonotype580H11	1	TRB:CGARGLGGAETLYF
clone_1935_H11	clonotype582H11	1	TRB:CAWSHWGGRDTQYF;TRA:CATSNSNNRIFF
clone_1936_H11	clonotype583H11	1	TRB:CASRQGGGNSDYTF;TRA:CILNATGYQNFYF
clone_1937_H11	clonotype584H11	1	TRB:CASSDGGDTGQLYF;TRA:CAASRQGGSAKLIF;TRA:CILRADYANKMIF
clone_1938_H11	clonotype585H11	1	TRB:CASSSGKYEQYF;TRA:CAAQVVGQLTF
clone_1939_H11	clonotype586H11	1	TRB:CAWSRIGVGDTQYF;TRA:CAADAGYQNFYF
clone_1940_H11	clonotype587H11	1	TRB:CAWSLTRIGAEQFF;TRA:CAPANSGTYQRF
clone_1941_H11	clonotype588H11	1	TRB:CAWSLLGDQNTLYF;TRA:CAAITNTNKVVF
clone_1942_H11	clonotype589H11	1	TRB:CAWSLQGIHSDYTF;TRA:CAIETNYNVLYF
clone_1943_H11	clonotype590H11	1	TRB:CASGEGGSYEQYF;TRA:CALRNSNNRIFF
clone_1944_H11	clonotype591H11	1	TRB:CASSGGLGPYEQYF;TRA:CAIDLGYNKLTF
clone_1945_H11	clonotype594H11	1	TRB:CASSFRDSPYEQYF;TRB:CASSRQNSPLYF;TRA:CAMNAAGGYKVVF
clone_1946_H11	clonotype595H11	1	TRB:CASSPTSNTLYF;TRA:CALEGGAGNKLTF
clone_1947_H11	clonotype596H11	1	TRB:CASSPTGGHYEQYF;TRB:CAWRPLGSQNTLYF;TRA:CALRRGSNAKLTF
clone_1948_H11	clonotype597H11	1	TRB:CAWSLGLSGNTLYF;TRA:CAIDRGTGSKLSF
clone_1949_H11	clonotype598H11	1	TRB:CAWLWGGNQDTQYF;TRA:CALNNNAGAKLTF
clone_1950_H11	clonotype599H11	1	TRB:CASRGQVQAPLF;TRA:CAAGRYNVLYF
clone_1951_H11	clonotype600H11	1	TRB:CASTSNERLFF;TRA:CAMGGGSNYKLTF
clone_1952_H11	clonotype601H11	1	TRB:CASRGGSAETLYF;TRA:CAMVHNNNNAPRF
clone_1953_H11	clonotype602H11	1	TRB:CASRRGETGQLYF;TRA:CAMEYNAGAKLTF
clone_1954_H11	clonotype603H11	1	TRB:CASGDRGWDTQYF;TRA:CAMWGGSNAKLTF;TRA:CVVVITGNTGKLIF
clone_1955_H11	clonotype604H11	1	TRB:CASSDVGGATEVFF;TRA:CASSSSGSWQLIF
clone_1956_H11	clonotype605H11	1	TRB:CASSQEGAETLYF;TRA:CALEQRSGSWQLIF
clone_1957_H11	clonotype606H11	1	TRB:CASSQDWNTEVFF;TRA:CALVTSSGSWQLIF
clone_1958_H11	clonotype607H11	1	TRB:CASSRDLNERLFF;TRA:CAVLYNTNTGKLTF
clone_1959_H11	clonotype608H11	1	TRB:CAWSRDNSQNTLYF;TRA:CAIWGVNAGAKLTF
clone_1960_H11	clonotype609H11	1	TRB:CAWSLAGGAREQYF;TRA:CALEPGYNQGKLIF
clone_1961_H11	clonotype610H11	1	TRB:CASSLRGEVFF;TRA:CAAEGQGGSAKLIF
clone_1962_H11	clonotype611H11	1	TRB:CASSPDSGNTLYF;TRA:CAAHTNAYKVIF
clone_1963_H11	clonotype612H11	1	TRB:CASSDAPNTEVFF;TRA:CAAKGMSNYNVLYF;TRA:CALSDQTGFASALTF
clone_1964_H11	clonotype613H11	1	TRB:CASRDRAIYEQYF;TRA:CAIDPNNYAQGLTF
clone_1965_H11	clonotype614H11	1	TRB:CASGGGQQDTQYF;TRA:CAADTNAYKVIF
clone_1966_H11	clonotype615H11	1	TRB:CASSDAQNTGQLYF;TRA:CAELYNVLYF
clone_1967_H11	clonotype616H11	1	TRB:CASSAVGNQDTQYF;TRA:CAALTTASLGNLQF
clone_1968_H11	clonotype618H11	1	TRB:CASSHRENTLYF;TRA:CAANYNQGKLIF
clone_1969_H11	clonotype619H11	1	TRB:CASSRSSYEQYF;TRA:CAFQGGSAKLIF
clone_1970_H11	clonotype620H11	1	TRB:CASSQEGNSNERLFF;TRB:CASSRSSYEQYF;TRA:CAVSGSNYQLIW
clone_1971_H11	clonotype621H11	1	TRB:CASSWTEDTQYF;TRA:CAASPNTNKVVF
clone_1972_H11	clonotype622H11	1	TRB:CSSSQGGTLYF;TRA:CALERSTNTGKLTF
clone_1973_H11	clonotype623H11	1	TRB:CASSSRDRYNSPLYF;TRB:CGARSVNSGNTLYF;TRA:CALSGTSSGQKLVF;TRA:CAVSRGGTYQRF
clone_1974_H11	clonotype624H11	1	TRB:CGARDRNNNQAPLF;TRA:CAVSNYAQGLTF
clone_1975_H11	clonotype625H11	1	TRB:CASSQESNSDYTF;TRA:CAAEVDGSSGNKLIF
clone_1976_H11	clonotype626H11	1	TRB:CASSQARVAEQFF;TRA:CALNYNTNTGKLTF;TRA:CAVSGSALGRLHF
clone_1977_H11	clonotype627H11	1	TRB:CASSPGQPETLYF;TRA:CAVKGNMGYKLTF
clone_1978_H11	clonotype628H11	1	TRB:CASSAGQGYEQYF;TRA:CALRSSNYNVLYF
clone_1979_H11	clonotype629H11	1	TRB:CASSMDREQYF;TRA:CAVSAGGNYQLIW
clone_1980_H11	clonotype630H11	1	TRB:CASSRQDTQYF;TRA:CAIDQASSSFSKLVF
clone_1981_H11	clonotype631H11	1	TRB:CASSSQQAPLF;TRA:CAPNNNAPRF
clone_1982_H11	clonotype632H11	1	TRB:CASRLNYEQYF;TRA:CAIARNTEGADRLTF
clone_1983_H11	clonotype633H11	1	TRB:CASSSGVEQYF;TRA:CAASPDSNYQLIW
clone_1984_H11	clonotype634H11	1	TRB:CASSDRGAETLYF;TRA:CAASERYTNKVVF
clone_1985_H11	clonotype635H11	1	TRB:CASSDRDRDTQYF;TRA:CAVSRNSNNRIFF
clone_1986_H11	clonotype636H11	1	TRB:CASGDLTDTEVFF;TRA:CAANSNNRIFF
clone_1987_H11	clonotype637H11	1	TRB:CASSLTGEGSDYTF;TRA:CASISGSFNKLTF
clone_1988_H11	clonotype638H11	1	TRB:CASSEGRGYAEQFF;TRA:CAAESSNTNKVVF
clone_1989_H11	clonotype639H11	1	TRB:CASSDALGGYEQYF;TRA:CAEVNTGNYKYVF
clone_1990_H11	clonotype640H11	1	TRB:CASSQVNSDYTF;TRA:CALNPNSNNRIFF
clone_1991_H11	clonotype641H11	1	TRB:CASNGGWGEQYF;TRA:CAADFTGANTGKLTF
clone_1992_H11	clonotype642H11	1	TRB:CASSRGNSPLYF;TRA:CAVSATGNYKYVF
clone_1993_H11	clonotype643H11	1	TRB:CASSYRNSDYTF;TRA:CAATGTGGYKVVF
clone_1994_H11	clonotype644H11	1	TRB:CASSFPTGDSDYTF;TRB:CGASAWGNQDTQYF;TRA:CAMRDRGNNRIFF
clone_1995_H11	clonotype645H11	1	TRB:CASSSGSYEQYF;TRA:CAVPTEGADRLTF
clone_1996_H11	clonotype646H11	1	TRB:CASSQGAHAEQFF;TRA:CAAVRGSALGRLHF
clone_1997_H11	clonotype647H11	1	TRB:CAWSTGHNYAEQFF;TRA:CAVRGNNNNAPRF
clone_1998_H11	clonotype648H11	1	TRB:CAWSPGTSGERLFF;TRA:CAVSMRSGYNKLTF
clone_1999_H11	clonotype649H11	1	TRB:CAWSLGQSGNTLYF;TRA:CAANYNQGKLIF;TRA:CALSPNNRIFF
[truncated: 318 more rows]

## Sheet: aKO2
Tcell_clone_rank	clonotype_id	count	cdr3s_aa
clone_1_seq_1	aKO_aKO_clonotype1	567	TRB:CASSPADWGESQNTLYF;TRA:CAMREGGNYNQGKLIF
clone_2_seq_1	aKO_aKO_clonotype2	310	TRB:CASSQDFQGVGNTLYF;TRA:CAMREGEDNTGKLTF;TRA:CAMREGEDNTGKLTF;TRA:CVLGDLNRIFF
clone_3_seq_1	aKO_aKO_clonotype3	141	TRB:CASSQDFQGAGDTQYF;TRA:CAMRDHDTNAYKVIF;TRA:CAMRDHDTNAYKVIF
clone_4_seq_1	aKO_aKO_clonotype4	138	TRB:CAWSPRNTEVFF;TRA:CAAEARNYAQGLTF;TRA:CALASNTNKVVF
clone_5_seq_1	aKO_aKO_clonotype5	46	TRB:CASSAGGGSPLYF;TRA:CALSEAGGSNAKLTF
clone_6_seq_1	aKO_aKO_clonotype6	45	TRB:CASSLAGSSAETLYF;TRA:CAAEAWSNYNVLYF;TRA:CAVSVTNTGKLTF
clone_7_seq_1	aKO_aKO_clonotype7	44	TRB:CASSQGASAEQFF;TRA:CALIESNNRIFF;TRA:CAVSMRTNTNKVVF
clone_8_seq_1	aKO_aKO_clonotype8	41	TRB:CTCSADGGAYAEQFF;TRA:CALRGGGSNAKLTF
clone_9_seq_1	aKO_aKO_clonotype10	39	TRB:CASGESRGYNSPLYF;TRA:CAVSEHTGGLSGKLTF
clone_10_seq_1	aKO_aKO_clonotype9	36	TRB:CASSSGGTEVFF;TRA:CAVRNTGYQNFYF
clone_11_seq_1	aKO_aKO_clonotype11	31	TRB:CASSFSGSSAETLYF;TRA:CAVSMNYNQGKLIF
clone_12_seq_1	aKO_aKO_clonotype12	24	TRB:CTCSAGGRYAEQFF;TRA:CALSPGGSNAKLTF
clone_13_seq_1	aKO_aKO_clonotype15	21	TRB:CASGADRGLAETLYF;TRA:CAAFSGGSNAKLTF
clone_14_seq_1	aKO_aKO_clonotype13	20	TRB:CASSQDGRTGNTEVFF;TRA:CALGRNNNNAPRF
clone_15_seq_1	aKO_aKO_clonotype14	18	TRB:CASSRDRGEQYF;TRA:CALRGGGRALIF
clone_16_seq_1	aKO_aKO_clonotype17	17	TRB:CASRGLVNEQYF;TRA:CAVRVLNNAGAKLTF
clone_17_seq_1	aKO_aKO_clonotype16	16	TRB:CASSWGRAEQFF
clone_18_seq_1	aKO_aKO_clonotype18	15	TRB:CASRRDWGSTLYF;TRA:CALSRNSNNRIFF
clone_19_seq_1	aKO_aKO_clonotype19	15	TRB:CASGEQGSVAETLYF;TRB:CASGEQGSVAETLYF;TRB:CASSLKVGGREQYF;TRA:CAAEYMSNYNVLYF
clone_20_seq_1	aKO_aKO_clonotype21	13	TRB:CTCSARPNYAEQFF;TRA:CALSEGTGGNNKLTF
clone_21_seq_1	aKO_aKO_clonotype20	12	TRB:CASSQEGRTGNTEVFF;TRA:CALSRNNNNAPRF
clone_22_seq_1	aKO_aKO_clonotype23	12	TRB:CASGDWGSAETLYF;TRA:CAASKQGGSAKLIF
clone_23_seq_1	aKO_aKO_clonotype22	10	TRB:CASSLEYEQYF;TRA:CAASSGGNNKLTF
clone_24_seq_1	aKO_aKO_clonotype24	10	TRB:CASSYRSANSDYTF;TRA:CAIPLSGGSNAKLTF
clone_25_seq_1	aKO_aKO_clonotype25	9	TRB:CASSSGTKDTQYF;TRA:CAIDRDSGGSNAKLTF;TRA:CALGRNSNNRIFF;TRA:CVVASNYAQGLTF
clone_26_seq_1	aKO_aKO_clonotype27	9	TRB:CASSLEYEQYF;TRA:CAASSGGNNKLTF
clone_27_seq_1	aKO_aKO_clonotype26	8	TRB:CASSQDGRTGPTEVFF;TRA:CALSVNNNNAPRF
clone_28_seq_1	aKO_aKO_clonotype28	8	TRB:CASSQEYTEVFF;TRA:CAASDVDYNQGKLIF
clone_29_seq_1	aKO_aKO_clonotype30	8	TRB:CASSQEGGVNQDTQYF;TRA:CAATTNAYKVIF
clone_30_seq_1	aKO_aKO_clonotype32	7	TRB:CASRRGGADTEVFF;TRA:CAVSAEGGRALIF
clone_31_seq_1	aKO_aKO_clonotype35	7	TRB:CTCSAAWQNTEVFF;TRA:CAAEAGGTNAYKVIF
clone_32_seq_1	aKO_aKO_clonotype31	6	TRB:CASSWGRAEQFF;TRA:CAIAHNTGNYKYVF
clone_33_seq_1	aKO_aKO_clonotype33	6	TRB:CASSQEWAANTEVFF
clone_34_seq_1	aKO_aKO_clonotype34	6	TRB:CASSQEGGRDNERLFF;TRA:CAVMASSSFSKLVF;TRA:CAVSTSGGNYKPTF
clone_35_seq_1	aKO_aKO_clonotype36	6	TRB:CASSPGRGSYEQYF;TRA:CAINSAGNKLTF
clone_36_seq_1	aKO_aKO_clonotype38	6	TRB:CASSRQNTEVFF
clone_37_seq_1	aKO_aKO_clonotype41	6	TRB:CASGADSYSGNTLYF;TRA:CAASKAGTYQRF
clone_38_seq_1	aKO_aKO_clonotype29	5	TRB:CASSQEGGRDNERLFF
clone_39_seq_1	aKO_aKO_clonotype39	5	TRB:CASSQEWAANTEVFF;TRA:CAANGSSGNKLIF
clone_40_seq_1	aKO_aKO_clonotype40	5	TRB:CTCSAGGRYAEQFF
clone_41_seq_1	aKO_aKO_clonotype42	5	TRB:CGASRVANSDYTF;TRA:CAVSEGSNYKLTF
clone_42_seq_1	aKO_aKO_clonotype43	5	TRB:CASNPGNSGNTLYF;TRA:CAAREGGGFTSGGNYKPTF;TRA:CAASLNTGGLSGKLTF
clone_43_seq_1	aKO_aKO_clonotype44	5	TRB:CAWTPGQNTEVFF;TRA:CAMRERDTGNYKYVF
clone_44_seq_1	aKO_aKO_clonotype37	4	TRB:CAWTPGQNTEVFF
clone_45_seq_1	aKO_aKO_clonotype45	4	TRB:CASSDGTGNSDYTF;TRA:CALGPQGGSAKLIF
clone_46_seq_1	aKO_aKO_clonotype46	4	TRB:CASSQEDSQNTLYF
clone_47_seq_1	aKO_aKO_clonotype49	4	TRB:CASSRVGSSAETLYF;TRA:CAAEFMSNYNVLYF
clone_48_seq_1	aKO_aKO_clonotype51	4	TRB:CTCSRDERKATLYF;TRA:CAVKTQVVGQLTF
clone_49_seq_1	aKO_aKO_clonotype47	3	TRB:CASGADRGLAETLYF;TRA:CAAFSGGSNAKLTF
clone_50_seq_1	aKO_aKO_clonotype48	3	TRB:CASSAGTPNSDYTF;TRB:CASSSGTKDTQYF;TRA:CALGRNSNNRIFF
clone_51_seq_1	aKO_aKO_clonotype53	3	TRB:CASSRGQTGQLYF;TRA:CAVSGPPDYSNNRLTL
clone_52_seq_1	aKO_aKO_clonotype54	3	TRB:CASSLQGAGGNTLYF;TRB:CASSPGGADERLFF;TRA:CAVKWDYNQGKLIF
clone_53_seq_1	aKO_aKO_clonotype55	3	TRB:CASRGAGANTEVFF;TRA:CAVSYSNTNKVVF
clone_54_seq_1	aKO_aKO_clonotype58	3	TRB:CASSDPGKNNERLFF;TRA:CAADRNSNNRIFF
clone_55_seq_1	aKO_aKO_clonotype59	3	TRB:CASSQEGTGGAETLYF;TRA:CAASEQGTGSKLSF
clone_56_seq_1	aKO_aKO_clonotype62	3	TRB:CASSQESRTGFYEQYF;TRA:CALRAGNTGKLIF
clone_57_seq_1	aKO_aKO_clonotype63	3	TRB:CSSSSRLGGRGYEQYF;TRA:CALGDLPGGYKVVF
clone_58_seq_1	aKO_aKO_clonotype64	3	TRB:CASSLEYEQYF;TRA:CAVSGQDTGNYKYVF
clone_59_seq_1	aKO_aKO_clonotype65	3	TRB:CASSLEYEQYF;TRA:CAASAGGNNKLTF
clone_60_seq_1	aKO_aKO_clonotype50	2	TRB:CASSFSGTGGDTQYF
clone_61_seq_1	aKO_aKO_clonotype52	2	TRB:CASSDWGSSYEQYF;TRA:CALSDRSGNTGKLIF
clone_62_seq_1	aKO_aKO_clonotype56	2	TRB:CASSRWGGADEQYF
clone_63_seq_1	aKO_aKO_clonotype57	2	TRB:CASSQENWGDEQYF;TRB:CASSSPGRPQAPLF;TRA:CAMRGTSSGQKLVF
clone_64_seq_1	aKO_aKO_clonotype60	2	TRB:CASSFDRATGQLYF
clone_65_seq_1	aKO_aKO_clonotype61	2	TRB:CASSQTGGSAETLYF;TRA:CAAERMSNYNVLYF;TRA:CAAERNNAGAKLTF
clone_66_seq_1	aKO_aKO_clonotype66	2	TRB:CASSLLGGAETLYF
clone_67_seq_1	aKO_aKO_clonotype67	2	TRB:CASSGPYAEQFF;TRA:CAEYTNAYKVIF
clone_68_seq_1	aKO_aKO_clonotype68	2	TRB:CASSPGANTEVFF;TRA:CALGRMSNYNVLYF
clone_69_seq_1	aKO_aKO_clonotype70	2	TRB:CASSRQNTEVFF;TRA:CAMRERDSGGSNAKLTF
clone_70_seq_1	aKO_aKO_clonotype72	2	TRB:CASSLQGYEQYF;TRA:CALEQGSWQLIF
clone_71_seq_1	aKO_aKO_clonotype73	2	TRB:CASGDWGSAETLYF;TRA:CAASKQGGSAKLIF
clone_72_seq_1	aKO_aKO_clonotype74	2	TRB:CASSLSKYEQYF;TRA:CAMEAGSWQLIF
clone_73_seq_1	aKO_aKO_clonotype75	2	TRB:CASSQETGGYEQYF;TRA:CAVSTSGGNYKPTF
clone_74_seq_1	aKO_aKO_clonotype76	2	TRB:CASSQDPDGDTQYF;TRA:CAMEAGGYKVVF;TRA:CASNMGYKLTF
clone_75_seq_1	aKO_aKO_clonotype77	2	TRB:CASSQEDWGDEQYF;TRA:CAASETGSGGKLTL
clone_76_seq_1	aKO_aKO_clonotype78	2	TRB:CASSQENWGDEQYF;TRA:CALSRNTGNYKYVF
clone_77_seq_1	aKO_aKO_clonotype79	2	TRB:CASSQEGTDNERLFF;TRA:CALSGGNYAQGLTF
clone_78_seq_1	aKO_aKO_clonotype80	2	TRB:CASSLDRVTEVFF;TRA:CALDRGTNKVVF
clone_79_seq_1	aKO_aKO_clonotype81	2	TRB:CASSVAGGAGNSPLYF;TRA:CALGDSGGSNAKLTF
clone_80_seq_1	aKO_aKO_clonotype82	2	TRB:CASSQETGSAETLYF;TRA:CALSESTGYQNFYF
clone_81_seq_1	aKO_aKO_clonotype83	2	TRB:CASSRDRAYNSPLYF;TRA:CAASMMDSNYQLIW
clone_82_seq_1	aKO_aKO_clonotype86	2	TRB:CASSIEQTNTEVFF;TRA:CVLSGGSALGRLHF
clone_83_seq_1	aKO_aKO_clonotype88	2	TRB:CASSQDAGLGSYEQYF;TRA:CAASEHTGYQNFYF
clone_84_seq_1	aKO_aKO_clonotype89	2	TRB:CASSLEGNSNERLFF;TRA:CAVSIRDMGYKLTF
clone_85_seq_1	aKO_aKO_clonotype90	2	TRB:CASSFDWGNTGQLYF;TRA:CALGARTGGYKVVF
clone_86_seq_1	aKO_aKO_clonotype91	2	TRB:CASSILLGGPNTGQLYF;TRA:CALSDRNYAQGLTF
clone_87_seq_1	aKO_aKO_clonotype93	2	TRB:CASGETANSDYTF;TRA:CAMGGNYAQGLTF
clone_88_seq_1	aKO_aKO_clonotype94	2	TRB:CASGDAGLGGFSAETLYF;TRA:CAMSGYNQGKLIF
clone_89_seq_1	aKO_aKO_clonotype100	1	TRB:CSSREQTEVFF;TRA:CAVRMSNYNVLYF
clone_90_seq_1	aKO_aKO_clonotype101	1	TRB:CGARDTGQLYF;TRA:CAASERRGTGSNRLTF
clone_91_seq_1	aKO_aKO_clonotype102	1	TRB:CAWSLQGTDYTF
clone_92_seq_1	aKO_aKO_clonotype103	1	TRB:CASSDGYEQYF
clone_93_seq_1	aKO_aKO_clonotype104	1	TRB:CGARQGSDTQYF
clone_94_seq_1	aKO_aKO_clonotype105	1	TRB:CAWSLGIGEVFF;TRA:CAAESYYNQGKLIF
clone_95_seq_1	aKO_aKO_clonotype106	1	TRB:CSGTGGRAEVFF;TRA:CAVRPNYNVLYF
clone_96_seq_1	aKO_aKO_clonotype108	1	TRA:CAAEANYAQGLTF
clone_97_seq_1	aKO_aKO_clonotype109	1	TRB:CASRWTGSEVFF
clone_98_seq_1	aKO_aKO_clonotype110	1	TRB:CASSLQNSPLYF
clone_99_seq_1	aKO_aKO_clonotype111	1	TRB:CASGDAAAEVFF
clone_100_seq_1	aKO_aKO_clonotype112	1	TRB:CASSMGGQDTQYF
clone_101_seq_1	aKO_aKO_clonotype113	1	TRB:CASSAAGTAEVFF
clone_102_seq_1	aKO_aKO_clonotype114	1	TRB:CASSGTGNSDYTF
clone_103_seq_1	aKO_aKO_clonotype115	1	TRB:CASSGGLGAEQFF
clone_104_seq_1	aKO_aKO_clonotype118	1	TRB:CASSEGNTEVFF;TRA:CALPRNNYAQGLTF
clone_105_seq_1	aKO_aKO_clonotype119	1	TRB:CASSGGLGAEQFF;TRA:CAMDPNNYAQGLTF
clone_106_seq_1	aKO_aKO_clonotype120	1	TRB:CASSSRVEVFF;TRA:CAAHRGSALGRLHF
clone_107_seq_1	aKO_aKO_clonotype121	1	TRB:CGARDRSTGQLYF;TRA:CALGDNRIFF
clone_108_seq_1	aKO_aKO_clonotype122	1	TRB:CAWTPGQNTEVFF;TRA:CAASRGGTGNYKYVF
clone_109_seq_1	aKO_aKO_clonotype123	1	TRB:CSSRGGTNTEVFF;TRA:CAVSETGGYKVVF
clone_110_seq_1	aKO_aKO_clonotype124	1	TRB:CASSLETLYF;TRA:CAVSAGGSNAKLTF
clone_111_seq_1	aKO_aKO_clonotype125	1	TRB:CAAGQNYAEQFF;TRB:CTCSAEGTPNSDYTF;TRA:CAASVTGSGGKLTL
clone_112_seq_1	aKO_aKO_clonotype126	1	TRB:CASGDGGDTQYF;TRA:CALSEPGTGSNRLTF
clone_113_seq_1	aKO_aKO_clonotype127	1	TRB:CASREGQEVFF;TRA:CALSLNSGGSNAKLTF
clone_114_seq_1	aKO_aKO_clonotype128	1	TRA:CAARDSNYQLIW
clone_115_seq_1	aKO_aKO_clonotype129	1	TRA:CAARQGGRALIF
clone_116_seq_1	aKO_aKO_clonotype130	1	TRB:CASSQSSYEQYF
clone_117_seq_1	aKO_aKO_clonotype131	1	TRA:CAAFSGGSNAKLTF
clone_118_seq_1	aKO_aKO_clonotype132	1	TRB:CAWSLLASAETLYF
clone_119_seq_1	aKO_aKO_clonotype133	1	TRB:CAWSLWLGGFEQYF
clone_120_seq_1	aKO_aKO_clonotype134	1	TRB:CAWDRDRGPGQLYF
clone_121_seq_1	aKO_aKO_clonotype135	1	TRB:CASSLQDEQYF
clone_122_seq_1	aKO_aKO_clonotype136	1	TRB:CASSPQGAETLYF
clone_123_seq_1	aKO_aKO_clonotype137	1	TRB:CASSEGTPYEQYF
clone_124_seq_1	aKO_aKO_clonotype138	1	TRB:CASSAGGGSPLYF
clone_125_seq_1	aKO_aKO_clonotype139	1	TRB:CASSAGGGSPLYF
clone_126_seq_1	aKO_aKO_clonotype140	1	TRB:CASSDWGSSYEQYF
clone_127_seq_1	aKO_aKO_clonotype141	1	TRB:CASSDWGSSYEQYF
clone_128_seq_1	aKO_aKO_clonotype142	1	TRB:CASSETDNNQAPLF
clone_129_seq_1	aKO_aKO_clonotype143	1	TRB:CASSDMGRNTEVFF
clone_130_seq_1	aKO_aKO_clonotype144	1	TRB:CASSDMGRNTEVFF
clone_131_seq_1	aKO_aKO_clonotype145	1	TRB:CASSDAQRAETLYF
clone_132_seq_1	aKO_aKO_clonotype147	1	TRB:CASSDGGNTGQLYF
clone_133_seq_1	aKO_aKO_clonotype148	1	TRB:CASSDWGLGDTQYF
clone_134_seq_1	aKO_aKO_clonotype149	1	TRB:CASSYPRGEQYF
clone_135_seq_1	aKO_aKO_clonotype150	1	TRB:CGARDLISNERLFF
clone_136_seq_1	aKO_aKO_clonotype151	1	TRB:CASSDGTGGYEQYF;TRA:CALNYNQGKLIF
clone_137_seq_1	aKO_aKO_clonotype152	1	TRB:CASSRDNYEQYF;TRA:CALERDNYAQGLTF
clone_138_seq_1	aKO_aKO_clonotype153	1	TRB:CGARHWGSAETLYF;TRA:CALERGTGYQNFYF
clone_139_seq_1	aKO_aKO_clonotype154	1	TRB:CASSAGTPNSDYTF;TRA:CAASRWNYNVLYF
clone_140_seq_1	aKO_aKO_clonotype155	1	TRB:CASSDGGNTGQLYF;TRB:CASSQDWGGYEQYF;TRA:CAASEANTGKLTF;TRA:CAASLYSNNRLTL
clone_141_seq_1	aKO_aKO_clonotype156	1	TRB:CASSDGGNTGQLYF;TRA:CAASLYSNNRLTL
clone_142_seq_1	aKO_aKO_clonotype157	1	TRB:CASSWTPSYEQYF;TRA:CAVSLTGNTGKLIF
clone_143_seq_1	aKO_aKO_clonotype158	1	TRB:CASSRQNTEVFF;TRA:CAMRERDSGGSNAKLTF
clone_144_seq_1	aKO_aKO_clonotype159	1	TRB:CASSDRDNQAPLF;TRA:CAASDYSNNRLTL
clone_145_seq_1	aKO_aKO_clonotype160	1	TRB:CASSQDWGEEQYF;TRA:CAARYTGNYKYVF
clone_146_seq_1	aKO_aKO_clonotype161	1	TRB:CASSLQGTLYF;TRA:CAAGSLTGSGGKLTL
clone_147_seq_1	aKO_aKO_clonotype162	1	TRB:CASSRDNYAEQFF
clone_148_seq_1	aKO_aKO_clonotype163	1	TRB:CASSRDNYAEQFF
clone_149_seq_1	aKO_aKO_clonotype164	1	TRB:CASSSGGYAEQFF
clone_150_seq_1	aKO_aKO_clonotype165	1	TRB:CASRRGGADTEVFF
clone_151_seq_1	aKO_aKO_clonotype166	1	TRB:CASRRGGADTEVFF
clone_152_seq_1	aKO_aKO_clonotype167	1	TRB:CASSQRDWGETLYF
clone_153_seq_1	aKO_aKO_clonotype168	1	TRB:CASSQDNSNTEVFF
clone_154_seq_1	aKO_aKO_clonotype169	1	TRB:CASSQENWGDEQYF
clone_155_seq_1	aKO_aKO_clonotype170	1	TRB:CASRGAGANTEVFF
clone_156_seq_1	aKO_aKO_clonotype171	1	TRB:CASRGAGANTEVFF
clone_157_seq_1	aKO_aKO_clonotype172	1	TRB:CAWSLDRGGGNTLYF
clone_158_seq_1	aKO_aKO_clonotype173	1	TRA:CAAAMLSGSFNKLTF
clone_159_seq_1	aKO_aKO_clonotype174	1	TRB:CASSSRADEQFF
clone_160_seq_1	aKO_aKO_clonotype175	1	TRB:CASRSGGYEQYF
clone_161_seq_1	aKO_aKO_clonotype176	1	TRB:CASSSDTYEQYF
clone_162_seq_1	aKO_aKO_clonotype177	1	TRB:CASSLDPERLFF
clone_163_seq_1	aKO_aKO_clonotype178	1	TRB:CASSPGTETLYF
clone_164_seq_1	aKO_aKO_clonotype179	1	TRB:CASSYNNQAPLF
clone_165_seq_1	aKO_aKO_clonotype180	1	TRB:CASSTGGGYAEQFF
clone_166_seq_1	aKO_aKO_clonotype181	1	TRB:CASSEGAGGLEQYF
clone_167_seq_1	aKO_aKO_clonotype182	1	TRB:CASSDGTGGDEQYF
clone_168_seq_1	aKO_aKO_clonotype183	1	TRB:CASSPGTPNYAEQFF
clone_169_seq_1	aKO_aKO_clonotype184	1	TRB:CASSPGTPNYAEQFF
clone_170_seq_1	aKO_aKO_clonotype185	1	TRB:CASSDARGANSDYTF
clone_171_seq_1	aKO_aKO_clonotype186	1	TRB:CTCSARAEQYF
clone_172_seq_1	aKO_aKO_clonotype188	1	TRB:CGARDRWGNYAEQFF
clone_173_seq_1	aKO_aKO_clonotype189	1	TRB:CASSSQGANTGQLYF;TRA:CAISGGKLIF
clone_174_seq_1	aKO_aKO_clonotype190	1	TRB:CASSGWESSYEQYF;TRA:CAFNNNNAPRF
clone_175_seq_1	aKO_aKO_clonotype191	1	TRB:CASSDNRGQDTQYF;TRA:CAVMNYNQGKLIF
clone_176_seq_1	aKO_aKO_clonotype192	1	TRB:CASSRDNYAEQFF;TRA:CAMRTNAYKVIF
clone_177_seq_1	aKO_aKO_clonotype193	1	TRB:CASSPPGGSDYTF;TRA:CARDTNAYKVIF
clone_178_seq_1	aKO_aKO_clonotype194	1	TRB:CASSQDGGNSPLYF;TRA:CAASEHAGAKLTF
clone_179_seq_1	aKO_aKO_clonotype195	1	TRB:CTGHSGNTLYF;TRA:CALAFNVGDNSKLIW
clone_180_seq_1	aKO_aKO_clonotype196	1	TRB:CTGHSGNTLYF;TRA:CAAEAWTEGADRLTF
clone_181_seq_1	aKO_aKO_clonotype197	1	TRB:CASSDAQGGYEQYF;TRB:CTCSAGALEVFF;TRA:CAARGGPNTGKLTF
clone_182_seq_1	aKO_aKO_clonotype198	1	TRB:CASSQDWGGYEQYF;TRA:CAASEANTGKLTF
clone_183_seq_1	aKO_aKO_clonotype200	1	TRB:CASSWGRAEQFF;TRA:CALRAGNTGKLIF
clone_184_seq_1	aKO_aKO_clonotype201	1	TRB:CASSDARGAETLYF;TRB:CASSDLQGNAEQFF;TRA:CAASINYNQGKLIF
clone_185_seq_1	aKO_aKO_clonotype202	1	TRB:CASSDPGKNNERLFF;TRA:CAASKQGGSAKLIF
clone_186_seq_1	aKO_aKO_clonotype203	1	TRB:CASSQEGDRDTLYF;TRA:CAASMNNNAGAKLTF
clone_187_seq_1	aKO_aKO_clonotype204	1	TRB:CASRGEIYEQYF;TRB:CASSLDRTSAETLYF;TRA:CAASADYQGGRALIF
clone_188_seq_1	aKO_aKO_clonotype205	1	TRB:CASSRRDWDEQYF;TRA:CALSAYQGGRALIF
clone_189_seq_1	aKO_aKO_clonotype206	1	TRB:CAWSLGQGSNERLFF;TRA:CALGDISAGNKLTF
clone_190_seq_1	aKO_aKO_clonotype207	1	TRB:CASSLNSGNTLYF;TRA:CAMRGPFNYGNEKITF
clone_191_seq_1	aKO_aKO_clonotype208	1	TRB:CASSDAGASAETLYF;TRA:CAGHNTNTGKLTF
clone_192_seq_1	aKO_aKO_clonotype209	1	TRB:CASRGDGQNTLYF;TRA:CAASATSSGQKLVF
clone_193_seq_1	aKO_aKO_clonotype210	1	TRA:CAVSIRDMGYKLTF
clone_194_seq_1	aKO_aKO_clonotype211	1	TRA:CAVSIRDMGYKLTF
clone_195_seq_1	aKO_aKO_clonotype212	1	TRA:CVLGDGGGRALIF
clone_196_seq_1	aKO_aKO_clonotype213	1	TRA:CAASNNNNAPRF
clone_197_seq_1	aKO_aKO_clonotype214	1	TRB:CASSLNRVYAEQFF
clone_198_seq_1	aKO_aKO_clonotype215	1	TRB:CASSFNRGVTEVFF
clone_199_seq_1	aKO_aKO_clonotype216	1	TRB:CASSLWGDNQAPLF
clone_200_seq_1	aKO_aKO_clonotype217	1	TRB:CASSQETGSAETLYF
clone_201_seq_1	aKO_aKO_clonotype218	1	TRB:CASSQDGVNQDTQYF
clone_202_seq_1	aKO_aKO_clonotype219	1	TRB:CASSQGTGWDSPLYF
clone_203_seq_1	aKO_aKO_clonotype220	1	TRB:CASSPPGVSAETLYF
clone_204_seq_1	aKO_aKO_clonotype221	1	TRB:CASSRLGANTGQLYF
clone_205_seq_1	aKO_aKO_clonotype222	1	TRB:CASSRLGANTGQLYF
clone_206_seq_1	aKO_aKO_clonotype224	1	TRB:CASSRDSNSDYTF
clone_207_seq_1	aKO_aKO_clonotype225	1	TRB:CASSGGSAETLYF
clone_208_seq_1	aKO_aKO_clonotype226	1	TRB:CASSTGTANTEVFF
clone_209_seq_1	aKO_aKO_clonotype227	1	TRB:CASSSRDWGDEQYF
clone_210_seq_1	aKO_aKO_clonotype228	1	TRB:CASSPGSNSDYTF
clone_211_seq_1	aKO_aKO_clonotype229	1	TRB:CASSLQANTEVFF
clone_212_seq_1	aKO_aKO_clonotype230	1	TRB:CASSAGLSYEQYF
clone_213_seq_1	aKO_aKO_clonotype231	1	TRB:CASSSGTKDTQYF
clone_214_seq_1	aKO_aKO_clonotype232	1	TRB:CASSSGTKDTQYF
clone_215_seq_1	aKO_aKO_clonotype233	1	TRB:CASSAGEGNTLYF
clone_216_seq_1	aKO_aKO_clonotype234	1	TRB:CASSLEIYAEQFF
clone_217_seq_1	aKO_aKO_clonotype237	1	TRB:CASSSPGRPQAPLF
clone_218_seq_1	aKO_aKO_clonotype238	1	TRB:CTCSEQGYEQYF
clone_219_seq_1	aKO_aKO_clonotype239	1	TRB:CTCSADRDTQYF
clone_220_seq_1	aKO_aKO_clonotype240	1	TRB:CTCSADRDTQYF
clone_221_seq_1	aKO_aKO_clonotype241	1	TRB:CTCGLGEDTQYF
clone_222_seq_1	aKO_aKO_clonotype242	1	TRB:CASRGPNYAEQFF;TRA:CAAEASYANKMIF
clone_223_seq_1	aKO_aKO_clonotype243	1	TRB:CASSPHRLQDTQYF;TRA:CAMEGNYAQGLTF
clone_224_seq_1	aKO_aKO_clonotype244	1	TRB:CASSWDRGDTQYF;TRA:CATEDSGTYQRF
clone_225_seq_1	aKO_aKO_clonotype246	1	TRB:CASSSGTKDTQYF;TRA:CALGRNSNNRIFF
clone_226_seq_1	aKO_aKO_clonotype247	1	TRB:CASSRDWGYEQYF;TRA:CAGRAGNTGKLIF
clone_227_seq_1	aKO_aKO_clonotype248	1	TRB:CASSEGDRLGAEQFF;TRA:CALSNNRIFF
clone_228_seq_1	aKO_aKO_clonotype249	1	TRB:CASSWTGGANTLYF;TRA:CAVSARGGRALIF
clone_229_seq_1	aKO_aKO_clonotype250	1	TRB:CASSQETGSAETLYF;TRA:CAVSIRDMGYKLTF
clone_230_seq_1	aKO_aKO_clonotype252	1	TRB:CASSLGTNTEVFF;TRA:CAASRASGSWQLIF
clone_231_seq_1	aKO_aKO_clonotype254	1	TRB:CASSQEWAANTEVFF;TRA:CAANGSSGNKLIF
clone_232_seq_1	aKO_aKO_clonotype255	1	TRB:CASKQNSYNSPLYF;TRA:CAASGASAGNKLTF;TRA:CALGERENSNNRIFF
clone_233_seq_1	aKO_aKO_clonotype256	1	TRB:CASSQEGTINERLFF;TRA:CAASRNNAGAKLTF
clone_234_seq_1	aKO_aKO_clonotype257	1	TRB:CASSSTGQNTLYF;TRA:CALGPSTGGYKVVF;TRA:CAVSGAGNTGKLIF
clone_235_seq_1	aKO_aKO_clonotype258	1	TRB:CASSEGWGGSETLYF;TRA:CAASVGGSNAKLTF
clone_236_seq_1	aKO_aKO_clonotype259	1	TRB:CASSQEWGGADTQYF;TRA:CAMREGRANTGKLTF
clone_237_seq_1	aKO_aKO_clonotype260	1	TRB:CASSGAPNTGQLYF;TRA:CALSDRGMLSGSFNKLTF
clone_238_seq_1	aKO_aKO_clonotype261	1	TRB:CASSPEGFSNERLFF;TRA:CAASEGGSAKLIF
clone_239_seq_1	aKO_aKO_clonotype262	1	TRB:CASSIDTGQLYF
clone_240_seq_1	aKO_aKO_clonotype263	1	TRB:CASSMGEDTQYF
clone_241_seq_1	aKO_aKO_clonotype264	1	TRA:CAVRVNSNNRIFF
clone_242_seq_1	aKO_aKO_clonotype265	1	TRB:CASSRQDLSNERLFF
clone_243_seq_1	aKO_aKO_clonotype266	1	TRB:CASSQEQGENNSPLYF
clone_244_seq_1	aKO_aKO_clonotype267	1	TRB:CASSQEGRTANTEVFF
clone_245_seq_1	aKO_aKO_clonotype270	1	TRB:CASSQEGGRDNERLFF
clone_246_seq_1	aKO_aKO_clonotype271	1	TRB:CASSQEARTGPTEVFF
clone_247_seq_1	aKO_aKO_clonotype272	1	TRB:CASSQEARTGPTEVFF
clone_248_seq_1	aKO_aKO_clonotype273	1	TRB:CASSQESRTGFYEQYF
clone_249_seq_1	aKO_aKO_clonotype274	1	TRB:CASSQDFQGVGNTLYF
clone_250_seq_1	aKO_aKO_clonotype275	1	TRA:CALSPNYNQGKLIF
clone_251_seq_1	aKO_aKO_clonotype276	1	TRA:CALGDESNYQLIW
clone_252_seq_1	aKO_aKO_clonotype277	1	TRB:CASSDWGNYAEQFF
clone_253_seq_1	aKO_aKO_clonotype278	1	TRB:CASSDWGNYAEQFF
clone_254_seq_1	aKO_aKO_clonotype279	1	TRB:CASSWTISGNTLYF
clone_255_seq_1	aKO_aKO_clonotype280	1	TRB:CASSWGTGFAEQFF
clone_256_seq_1	aKO_aKO_clonotype281	1	TRB:CASSFGHSAETLYF
clone_257_seq_1	aKO_aKO_clonotype282	1	TRB:CASSRRWGGTETLYF
clone_258_seq_1	aKO_aKO_clonotype283	1	TRB:CASSRDAGADAEQFF
clone_259_seq_1	aKO_aKO_clonotype284	1	TRB:CASSRVGSSAETLYF
clone_260_seq_1	aKO_aKO_clonotype285	1	TRB:CASSRVGSSAETLYF
clone_261_seq_1	aKO_aKO_clonotype286	1	TRB:CASSSPGTNQDTQYF
clone_262_seq_1	aKO_aKO_clonotype287	1	TRB:CASSWGQGGSDYTF
clone_263_seq_1	aKO_aKO_clonotype288	1	TRB:CASSLGGRNTEVFF
clone_264_seq_1	aKO_aKO_clonotype289	1	TRB:CASSLGGALAEQFF
clone_265_seq_1	aKO_aKO_clonotype291	1	TRB:CASSTGTANSDYTF
clone_266_seq_1	aKO_aKO_clonotype292	1	TRB:CASSRQGGTGQLYF
clone_267_seq_1	aKO_aKO_clonotype293	1	TRB:CASSPMGTGVEQYF
clone_268_seq_1	aKO_aKO_clonotype294	1	TRB:CASSELQGGGQNTLYF
clone_269_seq_1	aKO_aKO_clonotype295	1	TRB:CASSDGPGGGQNTLYF
clone_270_seq_1	aKO_aKO_clonotype296	1	TRB:CASSDAGTFTSQNTLYF
clone_271_seq_1	aKO_aKO_clonotype297	1	TRB:CASSQTGGSAETLYF
clone_272_seq_1	aKO_aKO_clonotype298	1	TRB:CTCSADDRYEQYF
clone_273_seq_1	aKO_aKO_clonotype299	1	TRB:CTCSGGTYTEVFF
clone_274_seq_1	aKO_aKO_clonotype300	1	TRB:CASSLDSGVNTLYF;TRA:CAAGNTGYQNFYF;TRA:CAASVTGNYKYVF
clone_275_seq_1	aKO_aKO_clonotype302	1	TRB:CTCSVSYNSPLYF;TRA:CILRVWGGNAGAKLTF
clone_276_seq_1	aKO_aKO_clonotype303	1	TRB:CASSLGGARTEVFF;TRA:CALERKGGSNAKLTF
clone_277_seq_1	aKO_aKO_clonotype304	1	TRB:CASSRGQNSGNTLYF;TRA:CAASQNSNNRIFF
clone_278_seq_1	aKO_aKO_clonotype305	1	TRB:CASSQESRTGFYEQYF;TRA:CAMRDTGGSNAKLTF
clone_279_seq_1	aKO_aKO_clonotype307	1	TRB:CASSFGGIQDTQYF;TRA:CAVSATDSNYQLIW
clone_280_seq_1	aKO_aKO_clonotype308	1	TRB:CASSLEQGGNTLYF;TRA:CAASRTGGYKVVF
clone_281_seq_1	aKO_aKO_clonotype309	1	TRB:CASSNGLGGQDTQYF;TRA:CAASTNMGYKLTF
clone_282_seq_1	aKO_aKO_clonotype310	1	TRB:CASSQEARTGPTEVFF;TRA:CAMSGYNQGKLIF
clone_283_seq_1	aKO_aKO_clonotype311	1	TRB:CASSQEGARDTQYF;TRA:CALSERTNAYKVIF
clone_284_seq_1	aKO_aKO_clonotype312	1	TRB:CASSLGQGVTEVFF;TRA:CAVSANTNTGKLTF
clone_285_seq_1	aKO_aKO_clonotype313	1	TRB:CASSQEGGRDNERLFF;TRA:CALGDLYTNTGKLTF
clone_286_seq_1	aKO_aKO_clonotype314	1	TRB:CASSLTTDSYEQYF;TRA:CAMRSSSGSWQLIF
clone_287_seq_1	aKO_aKO_clonotype315	1	TRB:CASSLEASNSDYTF;TRA:CAAMKGGRALIF
clone_288_seq_1	aKO_aKO_clonotype316	1	TRB:CASSLGASAETLYF;TRA:CAARYNQGKLIF
clone_289_seq_1	aKO_aKO_clonotype317	1	TRB:CASSLGDWGYEQYF;TRA:CAAGAGGSNAKLTF
clone_290_seq_1	aKO_aKO_clonotype319	1	TRA:CAVSEHTGGLSGKLTF
clone_291_seq_1	aKO_aKO_clonotype320	1	TRB:CASSRDRGWEQYF
clone_292_seq_1	aKO_aKO_clonotype321	1	TRB:CASSIKGNSPLYF
clone_293_seq_1	aKO_aKO_clonotype322	1	TRB:CASGAGGYAEQFF
clone_294_seq_1	aKO_aKO_clonotype324	1	TRB:CASRPRGWGGQNTLYF
clone_295_seq_1	aKO_aKO_clonotype325	1	TRB:CASSQEGTGANQDTQYF
clone_296_seq_1	aKO_aKO_clonotype326	1	TRB:CASSPQGISNERLFF
clone_297_seq_1	aKO_aKO_clonotype327	1	TRB:CASSSPGGSAETLYF
clone_298_seq_1	aKO_aKO_clonotype328	1	TRB:CASSLEGNSNERLFF
clone_299_seq_1	aKO_aKO_clonotype329	1	TRB:CASSLEGNSNERLFF
clone_300_seq_1	aKO_aKO_clonotype330	1	TRB:CASSLGRASQNTLYF
clone_301_seq_1	aKO_aKO_clonotype331	1	TRB:CASSFDWGNTGQLYF
clone_302_seq_1	aKO_aKO_clonotype332	1	TRB:CASSFDWGNTGQLYF
clone_303_seq_1	aKO_aKO_clonotype333	1	TRB:CASSSRDWDSAETLYF
clone_304_seq_1	aKO_aKO_clonotype334	1	TRB:CASSRTGGGYAEQFF
clone_305_seq_1	aKO_aKO_clonotype335	1	TRB:CASSPLWDRVAEQFF
clone_306_seq_1	aKO_aKO_clonotype336	1	TRB:CASSPGTGGYAEQFF
clone_307_seq_1	aKO_aKO_clonotype337	1	TRB:CASSLPGEANTEVFF
clone_308_seq_1	aKO_aKO_clonotype338	1	TRB:CASSQRLGASAETLYF
clone_309_seq_1	aKO_aKO_clonotype339	1	TRB:CASSQDRDRGYAEQFF
clone_310_seq_1	aKO_aKO_clonotype341	1	TRB:CTCSADRANAEQFF
clone_311_seq_1	aKO_aKO_clonotype342	1	TRB:CTCSAGQGAAEQFF
clone_312_seq_1	aKO_aKO_clonotype343	1	TRB:CTCSAGGGNSPLYF
clone_313_seq_1	aKO_aKO_clonotype344	1	TRB:CTCSAVFGKDTQYF
clone_314_seq_1	aKO_aKO_clonotype345	1	TRB:CTCSAQGADERLFF
clone_315_seq_1	aKO_aKO_clonotype346	1	TRB:CTCSGTGTGNTLYF
clone_316_seq_1	aKO_aKO_clonotype347	1	TRB:CTCSVEFNQDTQYF
clone_317_seq_1	aKO_aKO_clonotype348	1	TRB:CTCSADSSGNTLYF;TRA:CAVSNYNVLYF
clone_318_seq_1	aKO_aKO_clonotype349	1	TRB:CASSPGLGNQDTQYF;TRA:CAVRMSNYNVLYF
clone_319_seq_1	aKO_aKO_clonotype350	1	TRB:CASSFSGTGGDTQYF;TRA:CVLSVNYNQGKLIF
clone_320_seq_1	aKO_aKO_clonotype352	1	TRB:CASSFSGTGGDTQYF;TRA:CAASKQGGSAKLIF
clone_321_seq_1	aKO_aKO_clonotype353	1	TRB:CASSTDRVYSNERLFF;TRA:CAASVYYGNEKITF
clone_322_seq_1	aKO_aKO_clonotype354	1	TRB:CTCRAGGAGSDYTF;TRA:CAATTNAYKVIF;TRA:CALDRNSNNRIFF
clone_323_seq_1	aKO_aKO_clonotype355	1	TRB:CASSQEGPGTGQDTQYF;TRA:CALGDNYAQGLTF
clone_324_seq_1	aKO_aKO_clonotype356	1	TRB:CASSQDWGGSMAEQFF;TRA:CASSSGGSNAKLTF
clone_325_seq_1	aKO_aKO_clonotype358	1	TRB:CASSSPGQGKDEQYF;TRA:CAASSNNNNAPRF
clone_326_seq_1	aKO_aKO_clonotype359	1	TRB:CASSLDPDWGYEQYF;TRA:CAASATTQVVGQLTF
clone_327_seq_1	aKO_aKO_clonotype362	1	TRB:CASSIEQTNTEVFF
clone_328_seq_1	aKO_aKO_clonotype363	1	TRB:CASSIEQTNTEVFF
clone_329_seq_1	aKO_aKO_clonotype364	1	TRB:CASSIGVSNERLFF
clone_330_seq_1	aKO_aKO_clonotype365	1	TRB:CASSMQKNTGQLYF
clone_331_seq_1	aKO_aKO_clonotype366	1	TRB:CASSQGLGAETLYF
clone_332_seq_1	aKO_aKO_clonotype367	1	TRA:CALSEGDNYAQGLTF
clone_333_seq_1	aKO_aKO_clonotype368	1	TRA:CALRPPNMGYKLTF
clone_334_seq_1	aKO_aKO_clonotype369	1	TRB:CASSFPPGGLNTEVFF
clone_335_seq_1	aKO_aKO_clonotype370	1	TRB:CASSLTLGANTGQLYF
clone_336_seq_1	aKO_aKO_clonotype371	1	TRB:CASSQDVDWTSQNTLYF
clone_337_seq_1	aKO_aKO_clonotype372	1	TRB:CASSQDVDWTSQNTLYF
clone_338_seq_1	aKO_aKO_clonotype373	1	TRB:CTCSAEGTPNSDYTF
clone_339_seq_1	aKO_aKO_clonotype374	1	TRB:CTCSADRWSSYEQYF
clone_340_seq_1	aKO_aKO_clonotype375	1	TRB:CTCSADGGVTGTLYF
clone_341_seq_1	aKO_aKO_clonotype376	1	TRB:CTCSAAQAANQAPLF
clone_342_seq_1	aKO_aKO_clonotype377	1	TRB:CTCSAVGGADSDYTF
clone_343_seq_1	aKO_aKO_clonotype378	1	TRB:CTCSAGHTPNERLFF
clone_344_seq_1	aKO_aKO_clonotype379	1	TRB:CASSIEGGQYEQYF;TRA:CAMNSGTYQRF
clone_345_seq_1	aKO_aKO_clonotype380	1	TRB:CASRLDPGISNERLFF;TRA:CAARPNYNVLYF
clone_346_seq_1	aKO_aKO_clonotype381	1	TRB:CTCSGRGLGAETLYF;TRA:CAARPSGTYQRF
clone_347_seq_1	aKO_aKO_clonotype382	1	TRB:CASSLEAGAATGQLYF;TRA:CAAEDYSNNRLTL
clone_348_seq_1	aKO_aKO_clonotype383	1	TRB:CTCSATPGVQDTQYF;TRA:CALAVSGSFNKLTF
clone_349_seq_1	aKO_aKO_clonotype384	1	TRB:CTCSAEGHPNSDYTF;TRA:CAASTGSSGNKLIF
clone_350_seq_1	aKO_aKO_clonotype386	1	TRB:CASNPGLGNTGQLYF
clone_351_seq_1	aKO_aKO_clonotype387	1	TRA:CAMRDHDTNAYKVIF
clone_352_seq_1	aKO_aKO_clonotype388	1	TRA:CAMRDHDTNAYKVIF
clone_353_seq_1	aKO_aKO_clonotype389	1	TRA:CAMREGEDNTGKLTF
clone_354_seq_1	aKO_aKO_clonotype390	1	TRA:CAMREGEDNTGKLTF
clone_355_seq_1	aKO_aKO_clonotype391	1	TRB:CASSPADWGESQNTLYF
clone_356_seq_1	aKO_aKO_clonotype392	1	TRB:CASSPRDWGHNYAEQFF
clone_357_seq_1	aKO_aKO_clonotype393	1	TRB:CASSLDPGQGDAETLYF
clone_358_seq_1	aKO_aKO_clonotype395	1	TRB:CTCSAPRLGGLDTQYF
clone_359_seq_1	aKO_aKO_clonotype396	1	TRB:CASSPTGGARDTQYF;TRA:CAVSMGYKLTF
clone_360_seq_1	aKO_aKO_clonotype397	1	TRB:CASSIAGGNYAEQFF;TRA:CAASGRNNRIFF
clone_361_seq_1	aKO_aKO_clonotype398	1	TRB:CASSIEGPSAETLYF;TRA:CALVDRNTNTGKLTF
clone_362_seq_1	aKO_aKO_clonotype399	1	TRB:CASSIEGGFSYEQYF;TRA:CAASEEGANTGKLTF
clone_363_seq_1	aKO_aKO_clonotype400	1	TRB:CASSIKRSPANTEVFF
clone_364_seq_1	aKO_aKO_clonotype401	1	TRA:CAMREGGNYNQGKLIF
clone_365_seq_1	aKO_aKO_clonotype402	1	TRB:CASALGGQVDTQYF
clone_366_seq_1	aKO_aKO_clonotype403	1	TRA:CAATTNAYKVIF
clone_367_seq_1	aKO_aKO_clonotype404	1	TRA:CAAGQGGRALIF
clone_368_seq_1	aKO_aKO_clonotype405	1	TRA:CAASSGGNNKLTF
clone_369_seq_1	aKO_aKO_clonotype406	1	TRA:CAASSGGNNKLTF
clone_370_seq_1	aKO_aKO_clonotype407	1	TRA:CAASETNTNKVVF
clone_371_seq_1	aKO_aKO_clonotype408	1	TRB:CASGESRGYNSPLYF
clone_372_seq_1	aKO_aKO_clonotype409	1	TRB:CASSLEYEQYF
clone_373_seq_1	aKO_aKO_clonotype410	1	TRB:CAGGQGYEQYF;TRA:CALEGRGNTGKLIF
clone_374_seq_1	aKO_aKO_clonotype411	1	TRA:CAAASSGSWQLIF
clone_375_seq_1	aKO_aKO_clonotype412	1	TRB:CASSPGQDTQYF
clone_376_seq_1	aKO_aKO_clonotype413	1	TRB:CASSLVGGEQYF
clone_377_seq_1	aKO_aKO_clonotype414	1	TRB:CASGESNERLFF;TRA:CALNYGSSGNKLIF
clone_378_seq_1	aKO_aKO_clonotype415	1	TRB:CASGPRGLEQYF;TRA:CAVSLTGNTGKLIF
clone_379_seq_1	aKO_aKO_clonotype416	1	TRB:CASGTGNYAEQFF
clone_380_seq_1	aKO_aKO_clonotype417	1	TRB:CASGDPSAETLYF
clone_381_seq_1	aKO_aKO_clonotype418	1	TRB:CASGDAGASDYTF
clone_382_seq_1	aKO_aKO_clonotype419	1	TRB:CASGDAGASDYTF
clone_383_seq_1	aKO_aKO_clonotype420	1	TRB:CASGDFGTYEQYF
clone_384_seq_1	aKO_aKO_clonotype421	1	TRB:CASSHRDGNTLYF
clone_385_seq_1	aKO_aKO_clonotype422	1	TRB:CASSLQGSDTLYF
clone_386_seq_1	aKO_aKO_clonotype423	1	TRB:CASSLGANSDYTF
clone_387_seq_1	aKO_aKO_clonotype424	1	TRB:CASSPGQDYEQYF;TRA:CALSMSNYNVLYF
clone_388_seq_1	aKO_aKO_clonotype425	1	TRB:CASGDAGASDYTF;TRA:CAVRPNTGANTGKLTF
clone_389_seq_1	aKO_aKO_clonotype426	1	TRB:CASGDAQYAEQFF;TRA:CAADTNAYKVIF
clone_390_seq_1	aKO_aKO_clonotype427	1	TRB:CASGGTASAETLYF
clone_391_seq_1	aKO_aKO_clonotype428	1	TRB:CASSLLGGLDTLYF
clone_392_seq_1	aKO_aKO_clonotype429	1	TRB:CASSQGTGAETLYF;TRA:CAIDKYDSGYNKLTF
clone_393_seq_1	aKO_aKO_clonotype431	1	TRB:CASGDRGNNQAPLF;TRA:CAASDNNNAPRF
clone_394_seq_1	aKO_aKO_clonotype432	1	TRB:CASGAGQNNQAPLF;TRA:CAAMTGGYKVVF
clone_395_seq_1	aKO_aKO_clonotype433	1	TRB:CASGEGGGWNSPLYF
clone_396_seq_1	aKO_aKO_clonotype435	1	TRB:CASGDRQGTTGQLYF
clone_397_seq_1	aKO_aKO_clonotype436	1	TRB:CASGDARGYNSPLYF
clone_398_seq_1	aKO_aKO_clonotype438	1	TRB:CASGDAGDSNSDYTF;TRA:CAFPRNTGNYKYVF
clone_399_seq_1	aKO_aKO_clonotype439	1	TRB:CASSLDGGGNERLFF;TRA:CALGSSNTNKVVF
clone_400_seq_1	aKO_aKO_clonotype441	1	TRB:CASSPPGPLSNERLFF
clone_401_seq_1	aKO_aKO_clonotype442	1	TRB:CASGSGTGVGTGQLYF;TRA:CAVSAEASGGNYKPTF
clone_402_seq_1	aKO_aKO_clonotype443	1	TRA:CALTRNTGNYKYVF
clone_403_seq_1	aKO_aKO_clonotype444	1	TRB:CASGDATGGADTGQLYF
clone_404_seq_1	aKO_aKO_clonotype69	1	TRB:CASSDMGRNTEVFF;TRA:CVLGEPGGRALIF
clone_405_seq_1	aKO_aKO_clonotype71	1	TRB:CASGDADSPSGNTLYF;TRA:CATRAGNTGKLIF
clone_406_seq_1	aKO_aKO_clonotype84	1	TRB:CASSSPGRPQAPLF;TRA:CALGHVNTGNYKYVF
clone_407_seq_1	aKO_aKO_clonotype85	1	TRB:CASSQETGGYEQYF;TRA:CAMRDPNNYAQGLTF
clone_408_seq_1	aKO_aKO_clonotype87	1	TRB:CASSGTGGAHEQYF;TRA:CAATGGYKVVF
clone_409_seq_1	aKO_aKO_clonotype92	1	TRB:CASSSGLGGRQNTLYF;TRA:CAMRDANSGTYQRF
clone_410_seq_1	aKO_aKO_clonotype95	1	TRB:CAWGAGERLFF
clone_411_seq_1	aKO_aKO_clonotype96	1	TRB:CASSEQYEQYF
clone_412_seq_1	aKO_aKO_clonotype97	1	TRB:CSSREQTEVFF
clone_413_seq_1	aKO_aKO_clonotype98	1	TRB:CSSREQTEVFF
clone_414_seq_1	aKO_aKO_clonotype99	1	TRB:CSSREQTEVFF

## Sheet: p-aKO2
Tcell_clone_rank	clonotype_id	count	cdr3s_aa
clone_1_seq_2	H11_clonotype1	314	TRB:CASSDSLGFNYAEQFF;TRA:CAMREGWDSNYQLIW
clone_2_seq_2	H11_clonotype2	185	TRB:CTCSADPGAYAEQFF;TRA:CALRAGGSNAKLTF
clone_3_seq_2	H11_clonotype3	137	TRB:CASRDRVYEQYF;TRA:CAVSAVSYGNEKITF
clone_4_seq_2	H11_clonotype4	118	TRB:CASSDSLGFNYAEQFF
clone_5_seq_2	H11_clonotype5	93	TRB:CASSPGTGGYEQYF;TRA:CAANTGYQNFYF;TRA:CAVSARGGSNYKLTF
clone_6_seq_2	H11_clonotype6	79	TRB:CASSDSLGFNYAEQFF;TRA:CAMREGWDSNYQLIW
clone_7_seq_2	H11_clonotype7	48	TRB:CASSHGGRSAETLYF;TRB:CASSLPRNERLFF;TRA:CAAEAMSNYNVLYF
clone_8_seq_2	H11_clonotype10	42	TRB:CASSQERLGGLEQYF;TRA:CVWGSNNRIFF
clone_9_seq_2	H11_clonotype8	41	TRB:CTCSADLTGQLYF;TRA:CAANVNTGNYKYVF
clone_10_seq_2	H11_clonotype9	41	TRB:CASRRQGNTEVFF;TRA:CAASGTGYQNFYF
clone_11_seq_2	H11_clonotype12	39	TRB:CASSLGGASAETLYF;TRA:CAAEAFSNYNVLYF;TRA:CALGLLSGSFNKLTF
clone_12_seq_2	H11_clonotype11	35	TRB:CASSQAGASAETLYF;TRA:CAAEALSNYNVLYF
clone_13_seq_2	H11_clonotype14	35	TRB:CASSLTGGLAEQFF;TRA:CALYNTNTGKLTF
clone_14_seq_2	H11_clonotype13	32	TRB:CASSLVVGPSQNTLYF;TRA:CAASAMDTNAYKVIF
clone_15_seq_2	H11_clonotype15	32	TRB:CASSIEAQDTQYF;TRA:CATVEGADRLTF
clone_16_seq_2	H11_clonotype16	31	TRB:CASRTGDNQAPLF;TRA:CAAPSNMGYKLTF;TRA:CAEMLSGSFNKLTF
clone_17_seq_2	H11_clonotype19	28	TRB:CASSLGGAATEVFF;TRA:CVLTSNYNQGKLIF
clone_18_seq_2	H11_clonotype20	27	TRB:CASSGTGVSYEQYF;TRA:CAERTSSGQKLVF;TRA:CAVHTNAYKVIF
clone_19_seq_2	H11_clonotype18	26	TRB:CASSLGGREQYF;TRA:CAVRPDTNAYKVIF
clone_20_seq_2	H11_clonotype21	26	TRB:CASGDGGHEQYF;TRA:CAASRTGNYKYVF
clone_21_seq_2	H11_clonotype17	25	TRB:CASSQEGRTGGGEVFF;TRA:CALRLNNNNAPRF
clone_22_seq_2	H11_clonotype22	22	TRB:CASGDVGTAETLYF;TRA:CAAYVTGSGGKLTL
clone_23_seq_2	H11_clonotype23	20	TRB:CASSQDGRTGNERLFF;TRA:CAASRNNNNAPRF
clone_24_seq_2	H11_clonotype25	18	TRB:CASSPTGGENTLYF;TRA:CAVRGTGYQNFYF
clone_25_seq_2	H11_clonotype24	16	TRB:CASRDSAETLYF;TRA:CAAEPTGGNNKLTF;TRA:CILRDSGGSNYKLTF
clone_26_seq_2	H11_clonotype26	16	TRB:CASGDVGTAETLYF
clone_27_seq_2	H11_clonotype32	15	TRB:CGARVQGSSNERLFF;TRA:CADTEGADRLTF
clone_28_seq_2	H11_clonotype34	15	TRB:CASSTGTKDTQYF;TRA:CALGRNSNNRIFF
clone_29_seq_2	H11_clonotype27	14	TRB:CAWGRGEVFF;TRA:CAIERTGNYKYVF
clone_30_seq_2	H11_clonotype30	14	TRB:CASSQEGRTDNQAPLF
clone_31_seq_2	H11_clonotype39	14	TRB:CASSLWGQSSSAETLYF;TRA:CAMREGGNYNQGKLIF
clone_32_seq_2	H11_clonotype37	13	TRB:CASSQAGASAETLYF;TRA:CAAEAMSNYNVLYF
clone_33_seq_2	H11_clonotype28	12	TRB:CASSLRTEVFF;TRA:CALSAQGTGSKLSF
clone_34_seq_2	H11_clonotype31	12	TRB:CASGGRENTGQLYF;TRA:CAASWGGRALIF
clone_35_seq_2	H11_clonotype33	12	TRB:CASRPGGGNTGQLYF;TRA:CAVSGTNTGKLTF
clone_36_seq_2	H11_clonotype40	12	TRB:CASSQDGRTGDERLFF;TRA:CAAPRNNNNAPRF
clone_37_seq_2	H11_clonotype41	12	TRB:CASGGLGRYAEQFF;TRA:CAMRGTSSGQKLVF
clone_38_seq_2	H11_clonotype46	12	TRB:CASGDPGGAFQDTQYF;TRA:CALERNAGAKLTF;TRA:CAVMGGSNAKLTF
clone_39_seq_2	H11_clonotype29	11	TRB:CASSHTGGAHEQYF;TRA:CATMNYGSSGNKLIF
clone_40_seq_2	H11_clonotype42	11	TRB:CASSRTGNSAETLYF;TRA:CAAELMSNYNVLYF;TRA:CAVSSDRGSALGRLHF
clone_41_seq_2	H11_clonotype50	11	TRB:CTCSAAGLGVAETLYF;TRA:CAVSGHDSGYNKLTF
clone_42_seq_2	H11_clonotype36	10	TRB:CASSESSQNTLYF;TRA:CAARTQVVGQLTF
clone_43_seq_2	H11_clonotype38	10	TRB:CASSQSGTGDNYAEQFF;TRA:CAASEHSNMGYKLTF
clone_44_seq_2	H11_clonotype43	10	TRB:CASRPLQGANTEVFF;TRA:CALERFSGGSNAKLTF;TRA:CALSFFNTGNYKYVF
clone_45_seq_2	H11_clonotype44	10	TRB:CASSYRGENTEVFF;TRA:CAVRSWNSNNRIFF
clone_46_seq_2	H11_clonotype48	10	TRB:CASSLGGTEVFF;TRA:CAVRNTGYQNFYF
clone_47_seq_2	H11_clonotype51	10	TRB:CAWGRQNTLYF;TRA:CAIENYGNEKITF;TRA:CALSDRATGGNNKLTF
clone_48_seq_2	H11_clonotype52	10	TRB:CASSIEQGTEVFF;TRA:CAFNVGDNSKLIW
clone_49_seq_2	H11_clonotype45	9	TRB:CASSRDTQYF;TRA:CAAEVPTGGNNKLTF
clone_50_seq_2	H11_clonotype47	9	TRB:CASSQEGRTDNQAPLF;TRB:CASSYSAETLYF;TRA:CALGANNNNAPRF
clone_51_seq_2	H11_clonotype49	9	TRB:CASSQETGFAETLYF;TRA:CAARGPPSSFSKLVF;TRA:CAVSAGTGYQNFYF
clone_52_seq_2	H11_clonotype53	9	TRB:CASGGQGNSDYTF;TRB:CASGGQGNSDYTF;TRB:CASSRDSFSGNTLYF;TRA:CAASVGTNTGKLTF
clone_53_seq_2	H11_clonotype54	9	TRB:CASSGTGGNYAEQFF;TRA:CAVRIMATGGNNKLTF
clone_54_seq_2	H11_clonotype55	9	TRB:CASSQTGGSAETLYF;TRA:CAAEFMSNYNVLYF
clone_55_seq_2	H11_clonotype57	9	TRB:CASSQDQQGAGNTLYF;TRA:CAMRRAEGADRLTF;TRA:CAVSARPGYGNEKITF
clone_56_seq_2	H11_clonotype58	9	TRB:CASGDARAYNSPLYF;TRA:CAYYSNNRLTL
clone_57_seq_2	H11_clonotype35	8	TRB:CASSQEGRTGGGEVFF;TRA:CAAGRNNNNAPRF;TRA:CALDNNAGAKLTF
clone_58_seq_2	H11_clonotype56	8	TRB:CASGRGGVVAETLYF;TRA:CAAEPMSNYNVLYF
clone_59_seq_2	H11_clonotype60	8	TRB:CGASFRGGDTEVFF;TRA:CALSRNSNNRIFF
clone_60_seq_2	H11_clonotype66	8	TRB:CASSPNRNTGQLYF;TRA:CAVSGGSNAKLTF
clone_61_seq_2	H11_clonotype67	8	TRB:CASSQEGGNNYAEQFF;TRA:CAVSTLNTGNYKYVF
clone_62_seq_2	H11_clonotype68	8	TRB:CASSPRPDNNQAPLF;TRB:CASSQDGRTGNERLFF;TRA:CAAGRNNNNAPRF
clone_63_seq_2	H11_clonotype69	8	TRB:CASSAYRDTSGNTLYF;TRA:CAASEGMGYKLTF;TRA:CAVSMLSGSFNKLTF
clone_64_seq_2	H11_clonotype72	8	TRB:CASSPAGGYEQYF;TRA:CATGFASALTF
clone_65_seq_2	H11_clonotype59	7	TRB:CASSLQDSGNTLYF;TRB:CAWSPSNTEVFF;TRA:CAAEARNYAQGLTF
clone_66_seq_2	H11_clonotype61	7	TRB:CASRRQGNTEVFF
clone_67_seq_2	H11_clonotype63	7	TRB:CASSQEGRTGGGEVFF
clone_68_seq_2	H11_clonotype65	7	TRB:CASSQVGGRAQDTQYF;TRB:CTCSAGRGSSEVFF;TRA:CAMERQGGRALIF
clone_69_seq_2	H11_clonotype70	7	TRB:CTCSATGGRYAEQFF;TRA:CIVTAASSGSWQLIF
clone_70_seq_2	H11_clonotype74	7	TRB:CASSDLGSAETLYF;TRB:CTCSADGDSGNTLYF;TRA:CAAYVTGSGGKLTL
clone_71_seq_2	H11_clonotype79	7	TRB:CASRDSGNTLYF;TRA:CALSPYSGTYQRF
clone_72_seq_2	H11_clonotype80	7	TRB:CASGDGGNQAPLF;TRA:CAGNSNNRIFF
clone_73_seq_2	H11_clonotype62	6	TRB:CASSPLGVYAEQFF;TRA:CAVSNNYAQGLTF
clone_74_seq_2	H11_clonotype71	6	TRB:CTCSAPGQGNERLFF;TRA:CAASAGSGYNKLTF
clone_75_seq_2	H11_clonotype73	6	TRB:CASSPRDLDTQYF;TRA:CAASATGGNNKLTF
clone_76_seq_2	H11_clonotype75	6	TRB:CASSIWGANSDYTF;TRB:CASSQEGRTGGGEQYF;TRA:CAVSPNNNNAPRF
clone_77_seq_2	H11_clonotype81	6	TRB:CASGRTGGNYAEQFF;TRA:CAVRKMATGGNNKLTF
clone_78_seq_2	H11_clonotype84	6	TRB:CASGDVGTAETLYF;TRA:CAAYVTGSGGKLTL
clone_79_seq_2	H11_clonotype85	6	TRB:CASSRGGGDSDYTF;TRA:CAAEDAGNYKYVF
clone_80_seq_2	H11_clonotype86	6	TRB:CASSSGTKDTQYF;TRA:CALGRNSNNRIFF
clone_81_seq_2	H11_clonotype87	6	TRB:CASSQDGRTGDAEQFF;TRA:CAVSVNNNNAPRF
clone_82_seq_2	H11_clonotype89	6	TRB:CASSRDRVPGQLYF;TRA:CAVSYNTNTGKLTF
clone_83_seq_2	H11_clonotype90	6	TRB:CTCSADAGHERLFF;TRA:CALKGGGSNAKLTF
clone_84_seq_2	H11_clonotype91	6	TRB:CASSSTGGARTGQLYF;TRA:CALTDSNYQLIW
clone_85_seq_2	H11_clonotype92	6	TRB:CASSPDPLDSDYTF;TRB:CASSRSGNTLYF;TRA:CAVSPDTNAYKVIF
clone_86_seq_2	H11_clonotype101	5	TRB:CASGGLGRYAEQFF
clone_87_seq_2	H11_clonotype64	5	TRB:CASSFLGLDAEQFF;TRA:CAASKGGTNAYKVIF
clone_88_seq_2	H11_clonotype78	5	TRB:CASSFNSAETLYF;TRA:CAMREGTTASLGKLQF;TRA:CAMRNSGGSNYKLTF
clone_89_seq_2	H11_clonotype82	5	TRB:CASGRPDWGGYAEQFF;TRB:CASSRQNTEVFF;TRA:CAMRERDGGSNAKLTF;TRA:CATHYSNNRLTL
clone_90_seq_2	H11_clonotype88	5	TRB:CASSPNRNTGQLYF;TRA:CARTGGSNAKLTF
clone_91_seq_2	H11_clonotype98	5	TRB:CASSYFRGANTEVFF;TRA:CALSDQDAYKVIF
clone_92_seq_2	H11_clonotype100	4	TRB:CASGDWGDEQYF;TRA:CIVTDSAGNKLTF
clone_93_seq_2	H11_clonotype102	4	TRB:CASGDRQVNQDTQYF;TRA:CAVSGPNTGKLTF
clone_94_seq_2	H11_clonotype103	4	TRB:CASRTRELYF;TRA:CALSGSGGSNYKLTF
clone_95_seq_2	H11_clonotype105	4	TRB:CASSSGFTGQLYF;TRA:CALGATGGNNKLTF
clone_96_seq_2	H11_clonotype107	4	TRB:CAWSLPGTGKNSDYTF;TRA:CAVRRMATGGNNKLTF
clone_97_seq_2	H11_clonotype110	4	TRB:CASSLDTGDEQYF;TRA:CAASDTNAYKVIF
clone_98_seq_2	H11_clonotype111	4	TRB:CASSTGTKDTQYF;TRA:CALSRNSNNRIFF
clone_99_seq_2	H11_clonotype112	4	TRB:CASSQVGGAGQNTLYF;TRA:CAASMDNTNKVVF
clone_100_seq_2	H11_clonotype113	4	TRB:CASSQEGRTGGGEVFF;TRA:CAPMRNNNNAPRF
clone_101_seq_2	H11_clonotype114	4	TRB:CASSQDGRTGNERLFF;TRA:CALAHNNNNAPRF;TRA:CAVSMPGNTGKLIF
clone_102_seq_2	H11_clonotype115	4	TRB:CASSLSGRTNSDYTF;TRA:CAARGPGSFNKLTF
clone_103_seq_2	H11_clonotype116	4	TRB:CASSWTGGTNTEVFF;TRA:CAMRSITGNTGKLIF
clone_104_seq_2	H11_clonotype117	4	TRB:CASSLEGRDNSPLYF;TRB:CGARQGKDTGQLYF;TRA:CALRGGSNAKLTF
clone_105_seq_2	H11_clonotype120	4	TRB:CTCSALGGRGDTQYF;TRA:CATPDTNAYKVIF
clone_106_seq_2	H11_clonotype121	4	TRB:CTCSAVYKSNERLFF;TRA:CALAGTNTGKLTF
clone_107_seq_2	H11_clonotype122	4	TRB:CTCSALGGRSYEQYF;TRA:CALEGSGGNNKLTF
clone_108_seq_2	H11_clonotype123	4	TRB:CASSLWGQSSSAETLYF;TRA:CAMREGGNYNQGKLIF
clone_109_seq_2	H11_clonotype124	4	TRB:CASSTGNTGQLYF;TRA:CAASANYGNEKITF
clone_110_seq_2	H11_clonotype125	4	TRB:CASGEPGDQDTQYF;TRA:CALERNAGAKLTF
clone_111_seq_2	H11_clonotype76	4	TRA:CALERFSGGSNAKLTF
clone_112_seq_2	H11_clonotype77	4	TRB:CASSPNWGRQDTQYF;TRA:CAANTGANTGKLTF
clone_113_seq_2	H11_clonotype83	4	TRA:CAAEVPTGGNNKLTF
clone_114_seq_2	H11_clonotype93	4	TRB:CASSQEVTGGFTGQLYF;TRA:CAVSADNAPRF
clone_115_seq_2	H11_clonotype95	4	TRB:CASSQDGRTGNERLFF
clone_116_seq_2	H11_clonotype96	4	TRB:CASSLLLGQNTLYF
clone_117_seq_2	H11_clonotype97	4	TRB:CASSPGGRQDTQYF;TRA:CAIEATASLGKLQF
clone_118_seq_2	H11_clonotype99	4	TRB:CASSPLQEISNERLFF;TRA:CAMREGGNYNQGKLIF
clone_119_seq_2	H11_clonotype104	3	TRB:CASSQEGGPTEVFF;TRA:CAVSGDMGYKLTF
clone_120_seq_2	H11_clonotype106	3	TRB:CASSQVGQNTEVFF;TRA:CAASTNSNNRIFF
clone_121_seq_2	H11_clonotype108	3	TRB:CASRGGLGYEQYF;TRA:CALAGNYKYVF
clone_122_seq_2	H11_clonotype109	3	TRB:CASSRDFQDTQYF;TRA:CAASVVSNNRLTL
clone_123_seq_2	H11_clonotype118	3	TRB:CTCSAGRGSSEVFF;TRA:CALEGYANKMIF
clone_124_seq_2	H11_clonotype119	3	TRB:CTCSADGGVYAEQFF
clone_125_seq_2	H11_clonotype126	3	TRB:CASGGLGRYAEQFF;TRA:CAMRGTSSGQKLVF
clone_126_seq_2	H11_clonotype127	3	TRB:CASSQEGTNTGQLYF;TRA:CAAHNNNAPRF;TRA:CAASESNYQLIW
clone_127_seq_2	H11_clonotype128	3	TRB:CASSRTTNNQAPLF;TRA:CAAGTNAYKVIF
clone_128_seq_2	H11_clonotype130	3	TRB:CASSDRGAQAPLF;TRA:CAAATNSAGNKLTF
clone_129_seq_2	H11_clonotype131	3	TRB:CASSETGENTLYF;TRA:CAASKGGTNAYKVIF
clone_130_seq_2	H11_clonotype132	3	TRB:CASSLRRGEVFF;TRA:CALRGTGANTGKLTF
clone_131_seq_2	H11_clonotype133	3	TRB:CASSPGQYEQYF;TRA:CALAHRGSALGRLHF
clone_132_seq_2	H11_clonotype136	3	TRB:CASSDPGQGWEQYF;TRA:CAASAGRGTGSKLSF
clone_133_seq_2	H11_clonotype137	3	TRB:CASSMEDWGYEQYF;TRA:CALSMHNQGKLIF
clone_134_seq_2	H11_clonotype138	3	TRB:CASSLAGGLAEQFF;TRA:CALYNTNTGKLTF
clone_135_seq_2	H11_clonotype139	3	TRB:CASSGLGFYEQYF;TRA:CALRPMDYANKMIF
clone_136_seq_2	H11_clonotype140	3	TRB:CASSSQGDSDYTF;TRA:CAAVTGYQNFYF
clone_137_seq_2	H11_clonotype141	3	TRB:CASSRGQGARDTEVFF;TRA:CAASANVGDNSKLIW;TRA:CAAYVTGSGGKLTL
clone_138_seq_2	H11_clonotype143	3	TRB:CASSLGGSSAETLYF;TRA:CAAEALSNYNVLYF
clone_139_seq_2	H11_clonotype146	3	TRB:CASSLFLGGYAEQFF;TRB:CASSNRGRDTEVFF;TRA:CAVSASYNQGKLIF
clone_140_seq_2	H11_clonotype148	3	TRB:CTCSADGGVYAEQFF;TRA:CALRSGGSNAKLTF
clone_141_seq_2	H11_clonotype150	3	TRB:CASSIEGAGNTLYF;TRA:CALGDQNYAQGLTF
clone_142_seq_2	H11_clonotype152	3	TRB:CASGQGTGQLYF;TRA:CAASPNYGNEKITF
clone_143_seq_2	H11_clonotype153	3	TRB:CASGWGAGEQYF;TRA:CAASANYGNEKITF
clone_144_seq_2	H11_clonotype154	3	TRB:CASDPGQNQAPLF;TRA:CAVRPPNQGGSAKLIF
clone_145_seq_2	H11_clonotype155	3	TRB:CASSLSSGNTLYF;TRB:CTCSEGQAERLFF;TRA:CAASPNYGNEKITF
clone_146_seq_2	H11_clonotype156	3	TRB:CASGGTGAYEQYF;TRA:CALSGGSGGSNYKLTF
clone_147_seq_2	H11_clonotype157	3	TRB:CASGDAGGAREQYF;TRA:CALVDRRTGSGGKLTL
clone_148_seq_2	H11_clonotype158	3	TRB:CASGDASANSDYTF;TRA:CALEHNAGAKLTF
clone_149_seq_2	H11_clonotype159	3	TRB:CASGDAAGGDTLYF;TRA:CALERNAGAKLTF
clone_150_seq_2	H11_clonotype160	3	TRB:CASGDAGVGSDYTF;TRA:CALEHNAGAKLTF
clone_151_seq_2	H11_clonotype129	2	TRB:CASSQTVNSDYTF;TRA:CALSERTGGYKVVF
clone_152_seq_2	H11_clonotype134	2	TRB:CASSRDRGAPLF;TRA:CALVQGGRALIF
clone_153_seq_2	H11_clonotype135	2	TRB:CASSQGQYEQYF;TRA:CAASSPYQGGRALIF
clone_154_seq_2	H11_clonotype144	2	TRB:CASSRGTGRDTQYF;TRB:CASSSGTKDTQYF;TRA:CALGKNSNNRIFF
clone_155_seq_2	H11_clonotype145	2	TRB:CASSLETLYF;TRB:CASSLLLGQNTLYF;TRA:CALGDPGTQVVGQLTF
clone_156_seq_2	H11_clonotype147	2	TRB:CASSPMGQGRSEQYF;TRA:CAVRDSNYQLIW
clone_157_seq_2	H11_clonotype149	2	TRB:CTCSADGGVYAEQFF;TRA:CALRGGGSNAKLTF;TRA:CVWGSNNRIFF
clone_158_seq_2	H11_clonotype151	2	TRB:CASGDNNERLFF;TRA:CAAEAETGGYKVVF
clone_159_seq_2	H11_clonotype161	2	TRB:CASSQEGRTGGGEVFF;TRA:CALRPNNNNAPRF
clone_160_seq_2	H11_clonotype163	2	TRB:CASRLGGLEQYF;TRA:CAVSNTNAYKVIF
clone_161_seq_2	H11_clonotype164	2	TRB:CGARLGGQNTLYF;TRA:CALRRTGYQNFYF
clone_162_seq_2	H11_clonotype166	2	TRB:CASSGLSQNTLYF;TRB:CASSLIGQGYEQYF;TRA:CAASGSNNRIFF
clone_163_seq_2	H11_clonotype168	2	TRB:CASSRTGSNERLFF;TRA:CALGVHTGNYKYVF;TRA:CALSAGTGGYKVVF
clone_164_seq_2	H11_clonotype171	2	TRB:CASSQDVGNQAPLF;TRA:CAASIRSNNRIFF
clone_165_seq_2	H11_clonotype174	2	TRB:CASGDAAGGDTLYF;TRA:CALERNAGAKLTF
clone_166_seq_2	H11_clonotype175	2	TRB:CASSDGGQGYAEQFF;TRA:CAASKLPGTGSNRLTF
clone_167_seq_2	H11_clonotype177	2	TRB:CASSFDRGDTQYF;TRB:CASSPGQGGSQNTLYF;TRA:CAASSGSWQLIF
clone_168_seq_2	H11_clonotype178	2	TRB:CASSQEGQGAEQFF;TRA:CAVNYNQGKLIF
clone_169_seq_2	H11_clonotype182	2	TRB:CASRPLGTNTGQLYF;TRA:CALGDLVDYANKMIF
clone_170_seq_2	H11_clonotype185	2	TRB:CASSQEGTNTGQLYF;TRA:CAMRGITGNTGKLIF
clone_171_seq_2	H11_clonotype188	2	TRB:CASSRGLNQDTQYF;TRB:CTCSAGQGMGQDTQYF;TRA:CIVTSLDAQGLTF
clone_172_seq_2	H11_clonotype189	2	TRB:CASSLEQNTEVFF;TRA:CAAEATSSGQKLVF;TRA:CAAGTGYQNFYF
clone_173_seq_2	H11_clonotype190	2	TRB:CASSQEGHSNERLFF;TRA:CAASEGGRALIF
clone_174_seq_2	H11_clonotype191	2	TRB:CASSLQGANYAEQFF;TRA:CALGEVSNYNVLYF;TRA:CAVGTGGYKVVF
clone_175_seq_2	H11_clonotype192	2	TRB:CASSLGSYAEQFF;TRA:CAVSTTGGYKVVF
clone_176_seq_2	H11_clonotype193	2	TRB:CASSQGTGVYEQYF;TRA:CATDALSNYNVLYF
clone_177_seq_2	H11_clonotype194	2	TRB:CASSDAWFNQDTQYF;TRA:CALGDRITGNTGKLIF
clone_178_seq_2	H11_clonotype196	2	TRB:CTCSARTGGADQDTQYF;TRA:CALGNSAGNKLTF
clone_179_seq_2	H11_clonotype197	2	TRB:CASSSDWGTYEQYF;TRA:CAASSKGNMGYKLTF
clone_180_seq_2	H11_clonotype200	2	TRB:CASSLAWRDTEVFF;TRA:CAIDHNTNTGKLTF
clone_181_seq_2	H11_clonotype201	2	TRB:CASSQVGSANTEVFF;TRA:CALAHNAGAKLTF;TRA:CALAPSSGSWQLIF
clone_182_seq_2	H11_clonotype202	2	TRB:CASSIQGTSAETLYF;TRA:CAAEAYSGYNKLTF
clone_183_seq_2	H11_clonotype203	2	TRB:CASGRGGVVAETLYF;TRA:CAAEVMSNYNVLYF;TRA:CALSATSSGQKLVF
clone_184_seq_2	H11_clonotype204	2	TRB:CASSLFLGGYAEQFF;TRB:CASSNRGRDTEVFF;TRA:CAMRGNTGYQNFYF;TRA:CAVSASYNQGKLIF
clone_185_seq_2	H11_clonotype205	2	TRB:CASRPDWGGYEQYF;TRA:CALRLNNNNAPRF;TRA:CAVSIYQGGRALIF
clone_186_seq_2	H11_clonotype208	2	TRB:CASSFGGRVDTQYF;TRA:CAIVWNQTGFASALTF;TRA:CALFNVGDNSKLIW
clone_187_seq_2	H11_clonotype209	2	TRB:CASSLGMRAETLYF;TRB:CTCSADGGLYAEQFF;TRA:CALGGTGNTGKLIF
clone_188_seq_2	H11_clonotype210	2	TRB:CTCSANYNSPLYF;TRA:CALRRGSSGNKLIF;TRA:CAMRDTNNNAPRF
clone_189_seq_2	H11_clonotype211	2	TRB:CASSRGQGSGNTLYF;TRA:CAMRGYSGGSNAKLTF
clone_190_seq_2	H11_clonotype212	2	TRB:CASSLAGYNSPLYF;TRA:CAMREGSSGGSNYKLTF
clone_191_seq_2	H11_clonotype213	2	TRB:CASSPGQGAGNTLYF;TRB:CASSQDGGRGTEVFF;TRA:CATSNYNVLYF
clone_192_seq_2	H11_clonotype214	2	TRB:CASSLGGGIAETLYF;TRA:CAPPDGNNYAQGLTF
clone_193_seq_2	H11_clonotype215	2	TRB:CASRKDWGGFYEQYF;TRB:CASSQEGGSYEQYF;TRA:CILRGPGGSNAKLTF
clone_194_seq_2	H11_clonotype216	2	TRB:CTCSGLLSQNTLYF;TRA:CAVPSGGSNAKLTF
clone_195_seq_2	H11_clonotype217	2	TRB:CASSSLQGSGAEQFF;TRA:CALSDITGNTGKLIF;TRA:CAMTNSAGNKLTF
clone_196_seq_2	H11_clonotype218	2	TRB:CASSSPGQGAREQYF;TRA:CAADTNAYKVIF
clone_197_seq_2	H11_clonotype220	2	TRB:CASGVLGVQDTQYF;TRB:CASSISQGVAEQFF;TRA:CAVTSNNRIFF;TRA:CVLGPLQGGRALIF
clone_198_seq_2	H11_clonotype221	2	TRB:CASSLGQYNSPLYF;TRA:CAVNPFYQGGRALIF
clone_199_seq_2	H11_clonotype222	2	TRB:CASSLLGGRDYAEQFF;TRA:CAMREATGGNNKLTF
clone_200_seq_2	H11_clonotype224	2	TRB:CASSIVWSQNTLYF;TRA:CALSIIASSSFSKLVF
clone_201_seq_2	H11_clonotype225	2	TRB:CTCSADPAQTSAETLYF;TRA:CAMPGTQVVGQLTF;TRA:CAVSPGTGGYKVVF
clone_202_seq_2	H11_clonotype228	2	TRB:CASGVSRGEQYF;TRA:CALSDVGDNSKLIW
clone_203_seq_2	H11_clonotype229	2	TRB:CASSLGKNTLYF;TRA:CALSVDTNAYKVIF
clone_204_seq_2	H11_clonotype230	2	TRB:CASSPTKNTLYF;TRA:CALRNTGANTGKLTF
clone_205_seq_2	H11_clonotype232	2	TRB:CASGDAEGREQYF;TRA:CAAEAKGDTGYQNFYF;TRA:CAVTYNNNAPRF
clone_206_seq_2	H11_clonotype233	2	TRB:CASGDAGTGTEVFF;TRA:CALERNAGAKLTF
clone_207_seq_2	H11_clonotype234	2	TRB:CASSPGIGQDTQYF;TRA:CASLSGSFNKLTF
clone_208_seq_2	H11_clonotype235	2	TRB:CASGDAGGVTEVFF;TRA:CALSERYNQGKLIF;TRA:CALSERYNQGKLIF;TRA:CALSGATSSGQKLVF
clone_209_seq_2	H11_clonotype236	2	TRB:CASGDPGGVYAEQFF;TRA:CAGSNTNKVVF;TRA:CALERNAGAKLTF
clone_210_seq_2	H11_clonotype238	2	TRB:CASSPPTGGMYEQYF;TRA:CAVPTQVVGQLTF
clone_211_seq_2	H11_clonotype94	2	TRB:CGASWTGNYAEQFF;TRA:CAVSVGPNTGKLTF
clone_212_seq_2	H11_clonotype1001	1	TRB:CASSLGSSAETLYF;TRA:CAMRASSGSWQLIF
clone_213_seq_2	H11_clonotype1002	1	TRB:CASSQDWGGYEQYF;TRA:CAASGGASSSFSKLVF
clone_214_seq_2	H11_clonotype1003	1	TRB:CASSFVGAGNTLYF;TRA:CAMRETTGSGGKLTL
clone_215_seq_2	H11_clonotype1004	1	TRB:CASSRLINTGQLYF;TRA:CAMREGTGGNNKLTF
clone_216_seq_2	H11_clonotype1005	1	TRB:CASSGDAARNSPLYF;TRA:CAMRDSGGNYKPTF
clone_217_seq_2	H11_clonotype1006	1	TRB:CASSYGTGGYAEQFF;TRA:CALVERGSALGRLHF
clone_218_seq_2	H11_clonotype1007	1	TRB:CTCSASGNTEVFF;TRA:CAAVNNRIFF
clone_219_seq_2	H11_clonotype1008	1	TRB:CASSQDPRRSQNTLYF;TRA:CALSDRYGSSGNKLIF
clone_220_seq_2	H11_clonotype1009	1	TRB:CASSLDGENTEVFF;TRA:CALGDRRGNTGKLIF
clone_221_seq_2	H11_clonotype1011	1	TRB:CASSLAGYNSPLYF;TRA:CAMRESDTNAYKVIF
clone_222_seq_2	H11_clonotype1012	1	TRB:CASSLDRGSYEQYF;TRA:CAMRENGASSSFSKLVF
clone_223_seq_2	H11_clonotype1013	1	TRB:CASSSGQGWDTQYF;TRA:CAMREGRGNNAGAKLTF
clone_224_seq_2	H11_clonotype1014	1	TRB:CASSLDRNQDTQYF;TRA:CAAYTNTGKLTF
clone_225_seq_2	H11_clonotype1015	1	TRB:CASSTGTGGYEQYF;TRA:CAASDYSNNRLTL
clone_226_seq_2	H11_clonotype1016	1	TRB:CASSLGGAHERLFF;TRA:CAASAQGGSAKLIF
clone_227_seq_2	H11_clonotype1018	1	TRB:CASSLRVSQNTLYF;TRA:CAATKPTGNTGKLIF
clone_228_seq_2	H11_clonotype1019	1	TRB:CASSFLGGRDEQYF;TRB:CASSLGQGGEQYF;TRA:CAASVNNAGAKLTF
clone_229_seq_2	H11_clonotype1020	1	TRB:CTCSADGGTEVFF;TRA:CAASEAGNTGKLIF
clone_230_seq_2	H11_clonotype1021	1	TRB:CASSLEGSSERLFF;TRA:CAASSGTQVVGQLTF
clone_231_seq_2	H11_clonotype1022	1	TRB:CASSPDWGVDTQYF;TRA:CAASPHDTNAYKVIF
clone_232_seq_2	H11_clonotype1023	1	TRB:CASSPGHLYAEQFF;TRA:CAARSASSGSWQLIF
clone_233_seq_2	H11_clonotype1024	1	TRB:CASSIPADTQYF;TRA:CALGNYGNEKITF
clone_234_seq_2	H11_clonotype1025	1	TRB:CASRQGTNERLFF
clone_235_seq_2	H11_clonotype1027	1	TRB:CASSPGGITEVFF
clone_236_seq_2	H11_clonotype1028	1	TRB:CASSIWGQDTQYF
clone_237_seq_2	H11_clonotype1029	1	TRB:CASIRDSGNTLYF
clone_238_seq_2	H11_clonotype1030	1	TRA:CVLGDHGNAGAKLTF
clone_239_seq_2	H11_clonotype1031	1	TRA:CALSDHGNNNAPRF
clone_240_seq_2	H11_clonotype1033	1	TRA:CAVSMRRGSALGRLHF
clone_241_seq_2	H11_clonotype1034	1	TRB:CASSQDLTGGGYAEQFF
clone_242_seq_2	H11_clonotype1035	1	TRB:CASSQEVTGGFTGQLYF
clone_243_seq_2	H11_clonotype1036	1	TRB:CASSQEVTGGFTGQLYF
clone_244_seq_2	H11_clonotype1037	1	TRB:CASSPRTGSNERLFF
clone_245_seq_2	H11_clonotype1038	1	TRB:CASSAGGWSAETLYF
clone_246_seq_2	H11_clonotype1039	1	TRB:CASSSGQGRNTEVFF
clone_247_seq_2	H11_clonotype1040	1	TRB:CASSSLGGFNQDTQYF
clone_248_seq_2	H11_clonotype1041	1	TRB:CASSNSGTGEYEQYF
clone_249_seq_2	H11_clonotype1042	1	TRB:CASSPRDWGGVGQYF
clone_250_seq_2	H11_clonotype1043	1	TRB:CASSLDNISNERLFF
clone_251_seq_2	H11_clonotype1044	1	TRB:CASSLGDINTGQLYF
clone_252_seq_2	H11_clonotype1045	1	TRB:CASRARGRGYAEQFF
clone_253_seq_2	H11_clonotype1046	1	TRB:CASSPMGQGRSEQYF
clone_254_seq_2	H11_clonotype1048	1	TRB:CASSPMGQGRSEQYF
clone_255_seq_2	H11_clonotype1049	1	TRB:CASSFGAANTGQLYF
clone_256_seq_2	H11_clonotype1050	1	TRB:CASSFGAANTGQLYF
clone_257_seq_2	H11_clonotype1051	1	TRB:CASSFYTISNERLFF
clone_258_seq_2	H11_clonotype1052	1	TRB:CASRKDWGGFYEQYF
clone_259_seq_2	H11_clonotype1054	1	TRB:CASSPRPDNNQAPLF
clone_260_seq_2	H11_clonotype1055	1	TRB:CASSSPGTGAYEQYF
clone_261_seq_2	H11_clonotype1056	1	TRB:CASSLDWGGAGEQYF
clone_262_seq_2	H11_clonotype1057	1	TRB:CASSLEPGGKNTLYF
clone_263_seq_2	H11_clonotype1058	1	TRB:CASSQPGLGDYAEQFF
clone_264_seq_2	H11_clonotype1059	1	TRB:CASSQASGQGYAEQFF
clone_265_seq_2	H11_clonotype1060	1	TRB:CASSHGQNSYNSPLYF
clone_266_seq_2	H11_clonotype1061	1	TRB:CASSQGLGVSAETLYF
clone_267_seq_2	H11_clonotype1062	1	TRB:CASSHPGTGGSYEQYF
clone_268_seq_2	H11_clonotype1063	1	TRB:CSSSQTGGFNERLFF
clone_269_seq_2	H11_clonotype1064	1	TRB:CSSSQGQGGNTEVFF
clone_270_seq_2	H11_clonotype1065	1	TRB:CTCSALRGSYEQYF
clone_271_seq_2	H11_clonotype1066	1	TRB:CTCSADRQNTEVFF
clone_272_seq_2	H11_clonotype1068	1	TRB:CTCSAGRGSSEVFF
clone_273_seq_2	H11_clonotype1069	1	TRB:CTCSAVGRDTEVFF
clone_274_seq_2	H11_clonotype1070	1	TRB:CTCSAGQGNAEQFF
clone_275_seq_2	H11_clonotype1071	1	TRB:CTCSGGTVYAEQFF
clone_276_seq_2	H11_clonotype1072	1	TRB:CASRRDSQNTLYF;TRA:CAFHTGNYKYVF
clone_277_seq_2	H11_clonotype1073	1	TRB:CASSSGTGGSYEQYF;TRA:CAARTGGYKVVF
clone_278_seq_2	H11_clonotype1074	1	TRB:CASSLLSGVQDTQYF;TRA:CAIHSNTNKVVF
clone_279_seq_2	H11_clonotype1076	1	TRB:CSSSQGTGSSYEQYF;TRA:CAADTNTGKLTF
clone_280_seq_2	H11_clonotype1077	1	TRB:CASSLVWTGVGQLYF;TRA:CAAAPNSGTYQRF
clone_281_seq_2	H11_clonotype1078	1	TRB:CASSLGGVSSYEQYF;TRA:CAADMSNYNVLYF
clone_282_seq_2	H11_clonotype1079	1	TRB:CTCSADARGAEQYF;TRA:CAANYAQGLTF
clone_283_seq_2	H11_clonotype1080	1	TRB:CASSMPGLGEVFF;TRA:CAIDPMSNYNVLYF
clone_284_seq_2	H11_clonotype1081	1	TRB:CASSQKWDGTSNERLFF;TRA:CAASDSNNRIFF;TRA:CALSDTNAYKVIF
clone_285_seq_2	H11_clonotype1082	1	TRB:CASSADWGGNYAEQFF;TRA:CALSESNNRIFF
clone_286_seq_2	H11_clonotype1083	1	TRB:CTCSAEISNERLFF;TRA:CAARGGGNTGKLIF;TRA:CAIAFTGSGGKLTL
clone_287_seq_2	H11_clonotype1084	1	TRB:CASGRDRDAEQFF;TRB:CTCSAGLNQDTQYF;TRA:CAMREGVGNNAPRF;TRA:CAVSMYAYKVIF
clone_288_seq_2	H11_clonotype1085	1	TRB:CTCSAVTNTGQLYF;TRA:CAAPSGGSNAKLTF
clone_289_seq_2	H11_clonotype1087	1	TRB:CASRQGTNERLFF;TRA:CAVEGVTGSGGKLTL
clone_290_seq_2	H11_clonotype1088	1	TRB:CASRDRYNSPLYF;TRA:CATEGQGGRALIF
clone_291_seq_2	H11_clonotype1089	1	TRB:CASSLKAANTGQLYF;TRA:CAADDSGYNKLTF
clone_292_seq_2	H11_clonotype1090	1	TRB:CASSLRLGSQNTLYF;TRA:CAPPHMGYKLTF;TRA:CAVSNSAGNKLTF
clone_293_seq_2	H11_clonotype1091	1	TRB:CASSLSQGNYAEQFF;TRA:CAASDTGNYKYVF
clone_294_seq_2	H11_clonotype1092	1	TRB:CASSPWGAIAETLYF;TRA:CAESSSNTNKVVF
clone_295_seq_2	H11_clonotype1093	1	TRB:CASSRDRSGTGQLYF;TRA:CAVRGNSNNRIFF
clone_296_seq_2	H11_clonotype1094	1	TRB:CASSPSGTGGFEQYF;TRA:CAVYSNYQLIW
clone_297_seq_2	H11_clonotype1095	1	TRB:CASSLSWGGQDTQYF;TRA:CAVRLALGRLHF
clone_298_seq_2	H11_clonotype1096	1	TRB:CASSQGLGGLQNTLYF;TRA:CAVSSDYANKMIF
clone_299_seq_2	H11_clonotype1098	1	TRB:CASSPTANSDYTF;TRA:CALSASGSWQLIF
clone_300_seq_2	H11_clonotype1099	1	TRB:CASSSTGGNYAEQFF;TRA:CVLGINSAGNKLTF
clone_301_seq_2	H11_clonotype1100	1	TRB:CASSLAGNSGNTLYF;TRA:CVLGDRTNTGKLTF
clone_302_seq_2	H11_clonotype1101	1	TRB:CASSFRQGSAETLYF;TRA:CALSIASSSFSKLVF;TRA:CAVNYNQGKLIF
clone_303_seq_2	H11_clonotype1102	1	TRB:CASSLAGTINTEVFF;TRA:CAASLTGNTGKLIF
clone_304_seq_2	H11_clonotype1103	1	TRB:CASSRRLGGNQDTQYF;TRA:CATDADYSNNRLTL
clone_305_seq_2	H11_clonotype1104	1	TRB:CASQNWGGQNSQNTLYF;TRB:CASTRDRADTGQLYF;TRA:CAITTSSGQKLVF
clone_306_seq_2	H11_clonotype1105	1	TRB:CASSRQGASNSDYTF;TRA:CAVSPDQGGRALIF;TRA:CAVSRTGGYKVVF
clone_307_seq_2	H11_clonotype1106	1	TRB:CASRARGRGYAEQFF;TRB:CASSGGFYEQYF;TRA:CAVDTNAYKVIF;TRA:CVLALNYNQGKLIF
clone_308_seq_2	H11_clonotype1107	1	TRB:CASRARGRGYAEQFF;TRA:CAVDTNAYKVIF
clone_309_seq_2	H11_clonotype1108	1	TRB:CASSFAGTTNTEVFF;TRA:CAVSANQGGRALIF
clone_310_seq_2	H11_clonotype1109	1	TRB:CASSSGDSNNQAPLF;TRA:CAVSSGSWQLIF
clone_311_seq_2	H11_clonotype1110	1	TRB:CASSSFLGLSAETLYF;TRA:CAVRVDSNYQLIW
clone_312_seq_2	H11_clonotype1111	1	TRB:CASSIRVQNTLYF;TRA:CAVSLNTGYQNFYF
clone_313_seq_2	H11_clonotype1112	1	TRB:CASSIGHYAEQFF;TRA:CAVSMNQGGSAKLIF
clone_314_seq_2	H11_clonotype1113	1	TRB:CASSMGQTYEQYF;TRA:CALSMNNYAQGLTF
clone_315_seq_2	H11_clonotype1114	1	TRB:CASSIGKNTEVFF;TRA:CAVSGSAGNKLTF
clone_316_seq_2	H11_clonotype1115	1	TRB:CASSQEWGGANTGQLYF;TRA:CVLSRGQGGRALIF
clone_317_seq_2	H11_clonotype1116	1	TRB:CASSLDMRGGNTLYF;TRA:CALRALANSGTYQRF
clone_318_seq_2	H11_clonotype1117	1	TRB:CASSLTGGSSYEQYF;TRA:CAASELNNAGAKLTF
clone_319_seq_2	H11_clonotype1118	1	TRB:CASSFLGGSQDTQYF;TRA:CAASTSNTNKVVF
clone_320_seq_2	H11_clonotype1119	1	TRB:CASSLAGQGRNTLYF;TRA:CAMRDTTASLGKLQF
clone_321_seq_2	H11_clonotype1123	1	TRB:CASSINKYAEQFF;TRA:CAASANTGNYKYVF
clone_322_seq_2	H11_clonotype1124	1	TRB:CASSITVQDTQYF;TRA:CAASGVTNTGKLTF
clone_323_seq_2	H11_clonotype1125	1	TRB:CASSIAGEDTQYF;TRA:CALLDTNAYKVIF
clone_324_seq_2	H11_clonotype1126	1	TRB:CASSLDRGFNERLFF;TRA:CAVSEGYSNNRLTL
clone_325_seq_2	H11_clonotype1127	1	TRB:CASSLELVSQNTLYF;TRA:CALAGTGGYKVVF
clone_326_seq_2	H11_clonotype1128	1	TRB:CASSLTGGSTGQLYF;TRA:CAATSGGSNAKLTF
clone_327_seq_2	H11_clonotype1129	1	TRB:CASGDATGGADYAEQFF;TRA:CALGEDYSNNRLTL
clone_328_seq_2	H11_clonotype1130	1	TRB:CSSRPYWGNQDTQYF;TRA:CALYNAGAKLTF
clone_329_seq_2	H11_clonotype1131	1	TRB:CTCSADRQNTEVFF;TRA:CALSGGSNNRIFF
clone_330_seq_2	H11_clonotype1132	1	TRB:CASRRDRGVSNERLFF;TRA:CVVGDRGSALGRLHF
clone_331_seq_2	H11_clonotype1133	1	TRB:CASSRHWGGSQNTLYF;TRA:CALGDNAGAKLTF
clone_332_seq_2	H11_clonotype1134	1	TRB:CASSFYRGRRYAEQFF;TRA:CAMREQGGSAKLIF
clone_333_seq_2	H11_clonotype1135	1	TRB:CASSRRPGMTNERLFF;TRB:CTCSGLLSQNTLYF;TRA:CALSEASGSWQLIF
clone_334_seq_2	H11_clonotype1136	1	TRB:CTCSGTAYNSPLYF;TRA:CALSEGGFASALTF
clone_335_seq_2	H11_clonotype1137	1	TRB:CASSQGQASNERLFF;TRA:CAMRGNTEGADRLTF
clone_336_seq_2	H11_clonotype1138	1	TRB:CASSPGTGSNERLFF;TRA:CALSDWGTGGYKVVF
clone_337_seq_2	H11_clonotype1139	1	TRB:CASSQGLGSSEEQYF;TRA:CALGDLGGSALGRLHF
clone_338_seq_2	H11_clonotype1142	1	TRB:CTCSADWKAERLFF;TRA:CAASPTGKLTF
clone_339_seq_2	H11_clonotype1143	1	TRB:CTCSGRDWRDTQYF;TRA:CAMREGGSNYNVLYF
clone_340_seq_2	H11_clonotype1144	1	TRB:CASRQGTNERLFF;TRA:CAMRGVSGGSNAKLTF
clone_341_seq_2	H11_clonotype1145	1	TRB:CASSLSGGNQDTQYF;TRA:CALGDHRGSALGRLHF
clone_342_seq_2	H11_clonotype1146	1	TRB:CASSMRENTEVFF;TRA:CAASEGNNRIFF
clone_343_seq_2	H11_clonotype1147	1	TRB:CASSRGRNSPLYF;TRA:CAASGANTGKLTF
clone_344_seq_2	H11_clonotype1148	1	TRB:CASSFWGGNTGQLYF;TRA:CAAGNGANTGKLTF
clone_345_seq_2	H11_clonotype1150	1	TRB:CASSLVGSSNERLFF;TRA:CAARSSNTNKVVF
clone_346_seq_2	H11_clonotype1152	1	TRB:CASSFGQGGDERLFF;TRA:CAASVGTGGYKVVF
clone_347_seq_2	H11_clonotype1153	1	TRB:CASSFPGTGVWEQYF;TRA:CAASAGSSGSWQLIF
clone_348_seq_2	H11_clonotype1154	1	TRB:CASSLRTASAETLYF;TRA:CAATSSSGSWQLIF
clone_349_seq_2	H11_clonotype1155	1	TRB:CASSPRDWGGYEQYF;TRA:CAASALWTQVVGQLTF
clone_350_seq_2	H11_clonotype1156	1	TRB:CASSDFDWGYNYAEQFF;TRA:CAARLMYRGSALGRLHF
clone_351_seq_2	H11_clonotype1157	1	TRB:CASSRQANSDYTF;TRA:CALRLNYNQGKLIF
clone_352_seq_2	H11_clonotype1158	1	TRB:CASSIQNYAEQFF;TRA:CALSLNTGANTGKLTF
clone_353_seq_2	H11_clonotype1159	1	TRB:CASSIHRVGNTLYF
clone_354_seq_2	H11_clonotype1160	1	TRB:CASSIRRSGNTLYF
clone_355_seq_2	H11_clonotype1161	1	TRB:CASSIEGNNERLFF
clone_356_seq_2	H11_clonotype1162	1	TRB:CASSLQGNQDTQYF
clone_357_seq_2	H11_clonotype1163	1	TRB:CASSADRENAEQFF
clone_358_seq_2	H11_clonotype1164	1	TRA:CAVSLASSSFSKLVF
clone_359_seq_2	H11_clonotype1165	1	TRA:CAASGMNYNQGKLIF
clone_360_seq_2	H11_clonotype1166	1	TRA:CALVRSSNTNKVVF
clone_361_seq_2	H11_clonotype1167	1	TRB:CASSQEGGGQGSNERLFF
clone_362_seq_2	H11_clonotype1168	1	TRA:CALSELDMGYKLTF
clone_363_seq_2	H11_clonotype1169	1	TRA:CALTRNNYAQGLTF
clone_364_seq_2	H11_clonotype1170	1	TRA:CALRANSAGNKLTF
clone_365_seq_2	H11_clonotype1171	1	TRB:CASSFGQGRDAETLYF
clone_366_seq_2	H11_clonotype1174	1	TRB:CASSLETRGSNERLFF
clone_367_seq_2	H11_clonotype1177	1	TRB:CTCSAPGQGNERLFF
clone_368_seq_2	H11_clonotype1178	1	TRB:CTCSAPGQGNERLFF
clone_369_seq_2	H11_clonotype1180	1	TRB:CTCSAEQINQDTQYF
clone_370_seq_2	H11_clonotype1181	1	TRB:CTCSADLTTNTEVFF
clone_371_seq_2	H11_clonotype1182	1	TRB:CTCSADRGAGAEQFF
clone_372_seq_2	H11_clonotype1183	1	TRB:CTCSADRLGGDTQYF
clone_373_seq_2	H11_clonotype1184	1	TRB:CTCSADGGLYAEQFF
clone_374_seq_2	H11_clonotype1186	1	TRB:CTCSALGGRSYEQYF
clone_375_seq_2	H11_clonotype1187	1	TRB:CTCSALGGRSYEQYF
clone_376_seq_2	H11_clonotype1188	1	TRB:CTCSALGGRSYEQYF
clone_377_seq_2	H11_clonotype1190	1	TRB:CTCSAVDRANERLFF
clone_378_seq_2	H11_clonotype1191	1	TRB:CASSIAGGADTQYF;TRA:CAASAGGTGSNRLTF;TRA:CAIYNQGKLIF
clone_379_seq_2	H11_clonotype1192	1	TRB:CASSLEDWGIQDTQYF;TRA:CTPLNYNQGKLIF
clone_380_seq_2	H11_clonotype1195	1	TRB:CASSQPGLGGDQDTQYF;TRA:CILRVYGGNNKLTF
clone_381_seq_2	H11_clonotype1196	1	TRB:CASGDAEGNSDYTF;TRB:CASSINGDSYEQYF;TRA:CAADDTNAYKVIF
clone_382_seq_2	H11_clonotype1197	1	TRB:CASSLAGGYNQDTQYF;TRA:CAIYQGGSAKLIF
clone_383_seq_2	H11_clonotype1198	1	TRB:CASSIRTGKDTQYF;TRA:CAARRSNNRIFF;TRA:CAILLNAYKVIF
clone_384_seq_2	H11_clonotype1199	1	TRB:CASSIRGGEYEQYF;TRA:CAVNQGGRALIF
clone_385_seq_2	H11_clonotype1201	1	TRB:CASSPRLGASAETLYF;TRA:CATVEGADRLTF
clone_386_seq_2	H11_clonotype1202	1	TRB:CASSITDSGNTLYF;TRA:CAASAYSGTYQRF;TRA:CAPDTNAYKVIF
clone_387_seq_2	H11_clonotype1203	1	TRB:CASSIAGSQDTQYF;TRA:CALERSNYNQGKLIF
clone_388_seq_2	H11_clonotype1204	1	TRB:CASSIRTGGIEQYF;TRA:CALSGTNKVVF
clone_389_seq_2	H11_clonotype1205	1	TRB:CASGAPLWDYAEQFF;TRB:CASSGDRDLYEQYF;TRA:CAVKSSGSWQLIF
clone_390_seq_2	H11_clonotype1206	1	TRB:CASSLMAGGGGTEVFF;TRA:CALGERGRIFF
clone_391_seq_2	H11_clonotype1207	1	TRB:CASRGQPSAETLYF;TRA:CAMERGSGGSNYKLTF
clone_392_seq_2	H11_clonotype1208	1	TRB:CASSIRDNYAEQFF;TRA:CAHYNQGKLIF
clone_393_seq_2	H11_clonotype1209	1	TRB:CASSMKGAGNTLYF;TRA:CALSENNAGAKLTF
clone_394_seq_2	H11_clonotype1210	1	TRB:CASSPYRLSYNSPLYF;TRA:CAASGVDSNYQLIW
clone_395_seq_2	H11_clonotype1211	1	TRB:CASSLSWGASAETLYF;TRA:CVLSLNSNNRIFF
clone_396_seq_2	H11_clonotype1213	1	TRB:CTCSADGGLYAEQFF;TRA:CALRAGGSNAKLTF
clone_397_seq_2	H11_clonotype1214	1	TRB:CTCSAGLADTGQLYF;TRA:CAAGEVITGNTGKLIF
clone_398_seq_2	H11_clonotype1215	1	TRB:CASSIEHSNTEVFF;TRA:CALSPGSALGRLHF
clone_399_seq_2	H11_clonotype1216	1	TRB:CASSAGTGGLSNERLFF;TRA:CAVSRGGNMGYKLTF
clone_400_seq_2	H11_clonotype1217	1	TRB:CTCSAGNRVGTEVFF;TRA:CAASRVSSGSWQLIF
clone_401_seq_2	H11_clonotype1218	1	TRB:CASSMEYSGNTLYF;TRA:CAASHNNAGAKLTF
clone_402_seq_2	H11_clonotype1219	1	TRB:CASSPDWGANTGQLYF;TRA:CALGDPSGSWQLIF
clone_403_seq_2	H11_clonotype1220	1	TRB:CASSRLGGRDAETLYF;TRA:CAASLRNSNNRIFF
clone_404_seq_2	H11_clonotype1221	1	TRB:CSSSQSAGGGGSDYTF;TRA:CAVSGYQGGRALIF
clone_405_seq_2	H11_clonotype1222	1	TRB:CTCSADGGLYAEQFF;TRA:CALGHTEGADRLTF
clone_406_seq_2	H11_clonotype1223	1	TRB:CTCSAATGEGERLFF;TRA:CALSGTSSGQKLVF
clone_407_seq_2	H11_clonotype1224	1	TRB:CASSPLRGASQNTLYF;TRA:CALGDQGGNTGKLIF
clone_408_seq_2	H11_clonotype1225	1	TRB:CTCRLGQGGGTEVFF;TRA:CAASLITGNTGKLIF
clone_409_seq_2	H11_clonotype1226	1	TRB:CTCSADQGARAEQFF;TRA:CALRALNTGNYKYVF
clone_410_seq_2	H11_clonotype1229	1	TRB:CTCSAAPTGGNTLYF;TRA:CALGDRAGANTGKLTF
clone_411_seq_2	H11_clonotype1230	1	TRB:CASNAGTGADEQYF;TRA:CALGDLNYNQGKLIF
clone_412_seq_2	H11_clonotype1231	1	TRB:CASRRDWGEGQNTLYF;TRA:CAMREDDSGYNKLTF
clone_413_seq_2	H11_clonotype1232	1	TRB:CASSLSGGARYAEQFF;TRA:CAMREGLTGGYKVVF
clone_414_seq_2	H11_clonotype1233	1	TRB:CTCSAQGYNNQAPLF;TRA:CAMREGNYNQGKLIF
clone_415_seq_2	H11_clonotype1234	1	TRB:CASSLVQGARGNTLYF;TRA:CAASAGGGRALIF
clone_416_seq_2	H11_clonotype1235	1	TRB:CTCSANSNNYAEQFF;TRA:CAASTNSNNRIFF
clone_417_seq_2	H11_clonotype1236	1	TRB:CSSSQSGRGPNERLFF;TRA:CAASDPSGSWQLIF
clone_418_seq_2	H11_clonotype1237	1	TRB:CASSLIPVISNERLFF;TRA:CALRNNNNAPRF
clone_419_seq_2	H11_clonotype1238	1	TRB:CASSIGDWGYEQYF;TRA:CALSDPTGGNNKLTF
clone_420_seq_2	H11_clonotype1239	1	TRB:CASSIAQGYTEVFF;TRA:CALSDPSGGSNYKLTF
clone_421_seq_2	H11_clonotype1240	1	TRB:CASSIPWASAETLYF
clone_422_seq_2	H11_clonotype1242	1	TRA:CALSFFNTGNYKYVF
clone_423_seq_2	H11_clonotype1243	1	TRA:CALSFFNTGNYKYVF
clone_424_seq_2	H11_clonotype1245	1	TRA:CAMREGWDSNYQLIW
clone_425_seq_2	H11_clonotype1246	1	TRA:CAMREGWDSNYQLIW
clone_426_seq_2	H11_clonotype1247	1	TRB:CASSLRGLGYNYAEQFF
clone_427_seq_2	H11_clonotype1250	1	TRB:CASSLWGQSSSAETLYF
clone_428_seq_2	H11_clonotype1252	1	TRB:CTCSAGTGRSSYEQYF
clone_429_seq_2	H11_clonotype1254	1	TRB:CASSIPDGKNTEVFF;TRA:CAARGTGNTGKLIF
clone_430_seq_2	H11_clonotype1255	1	TRB:CASSIWGASSYEQYF;TRA:CALDNNNNAPRF
clone_431_seq_2	H11_clonotype1256	1	TRB:CASSIPTISQNTLYF;TRA:CAMVASSGSWQLIF
clone_432_seq_2	H11_clonotype1258	1	TRB:CASSIAGENTGQLYF;TRA:CALSGASGSFNKLTF
clone_433_seq_2	H11_clonotype1259	1	TRB:CASSPGGLSNERLFF;TRA:CAARDSGYNKLTF
clone_434_seq_2	H11_clonotype1260	1	TRB:CASSPGTTSAETLYF;TRA:CAVSVAGTGSNRLTF
clone_435_seq_2	H11_clonotype1261	1	TRB:CASSLGLGGRNTGQLYF;TRA:CAVRVDYANKMIF
clone_436_seq_2	H11_clonotype1262	1	TRB:CASTSPQVSSYEQYF;TRA:CAASTGANTGKLTF
clone_437_seq_2	H11_clonotype1264	1	TRB:CTCSADPRLGVYEQYF;TRA:CALRATASLGKLQF
clone_438_seq_2	H11_clonotype1265	1	TRB:CASSIRPIYNSPLYF;TRA:CAMSNRNSNNRIFF
clone_439_seq_2	H11_clonotype1266	1	TRB:CTCSADSTYYNSPLYF;TRA:CAVGAMNYNQGKLIF
clone_440_seq_2	H11_clonotype1268	1	TRB:CASSIEGGSAETLYF;TRA:CAMREGDNYAQGLTF
clone_441_seq_2	H11_clonotype1269	1	TRB:CASSRPGQGGERLFF;TRA:CAARNYNQGKLIF
clone_442_seq_2	H11_clonotype1270	1	TRB:CTCSADGWGAYAEQFF;TRA:CAASAGSNNRIFF
clone_443_seq_2	H11_clonotype1271	1	TRB:CASSLDGRGLANSDYTF;TRA:CALSDTNKVVF
clone_444_seq_2	H11_clonotype1272	1	TRB:CASSLNWGGADQNTLYF;TRA:CAARLNTGGLSGKLTF
clone_445_seq_2	H11_clonotype1273	1	TRB:CASSKRQGNYAEQFF;TRA:CALSANYGNEKITF
clone_446_seq_2	H11_clonotype1274	1	TRB:CASSLGWGGLGQDTQYF;TRA:CALSDQGQGGSAKLIF
clone_447_seq_2	H11_clonotype1275	1	TRA:CAMREGWDSNYQLIW
clone_448_seq_2	H11_clonotype1276	1	TRA:CAMREGWDSNYQLIW
clone_449_seq_2	H11_clonotype1277	1	TRA:CAMREGWDSNYQLIW
clone_450_seq_2	H11_clonotype1278	1	TRA:CAMREGWDSNYQLIW
clone_451_seq_2	H11_clonotype1280	1	TRB:CASGEEQYF
clone_452_seq_2	H11_clonotype1281	1	TRB:CTCSAGTGGFYNSPLYF;TRA:CAVPWGRALIF
clone_453_seq_2	H11_clonotype1282	1	TRB:CTCSSPLTGASAETLYF;TRA:CAMERGSAGNKLTF
clone_454_seq_2	H11_clonotype1283	1	TRB:CASSIPQGATTGQLYF;TRA:CVLSALENYAQGLTF
clone_455_seq_2	H11_clonotype1284	1	TRB:CTCSADRGLGELDEQYF;TRA:CALAPSNTNKVVF
clone_456_seq_2	H11_clonotype1285	1	TRB:CTCSADLRDWGAETLYF;TRA:CAASIGTNAYKVIF
clone_457_seq_2	H11_clonotype1286	1	TRB:CASSRTGGPSQNTLYF;TRA:CALNTGGLSGKLTF
clone_458_seq_2	H11_clonotype1287	1	TRA:CAASPNYNVLYF
clone_459_seq_2	H11_clonotype1288	1	TRA:CAASTNYNVLYF
clone_460_seq_2	H11_clonotype1289	1	TRB:CASGDVGTAETLYF
clone_461_seq_2	H11_clonotype1290	1	TRB:CASGDVGTAETLYF
clone_462_seq_2	H11_clonotype1291	1	TRB:CASGEDTQYF;TRA:CALGNTGNYKYVF
clone_463_seq_2	H11_clonotype1292	1	TRB:CASGDERLFF;TRA:CAAEAVGDNSKLIW
clone_464_seq_2	H11_clonotype1293	1	TRB:CASSILPGLGFAETLYF;TRA:CAVQNYNQGKLIF
clone_465_seq_2	H11_clonotype1294	1	TRB:CASGDLGGYAEQFF;TRA:CAVRDYNVGDNSKLIW
clone_466_seq_2	H11_clonotype1295	1	TRB:CASGDVGTAETLYF;TRA:CAAYVTGSGGKLTL
clone_467_seq_2	H11_clonotype1296	1	TRB:CASSLGGQYF;TRA:CAMREGAGANTGKLTF
clone_468_seq_2	H11_clonotype1297	1	TRA:CAVNNAGAKLTF
clone_469_seq_2	H11_clonotype1298	1	TRA:CAASDTNAYKVIF
clone_470_seq_2	H11_clonotype1299	1	TRB:CASGNDTEVFF
clone_471_seq_2	H11_clonotype1300	1	TRB:CASSPNTEVFF
clone_472_seq_2	H11_clonotype1301	1	TRB:CASSRGSEVFF
clone_473_seq_2	H11_clonotype1303	1	TRB:CASGDIYEQYF;TRA:CILRVNTEGADRLTF
clone_474_seq_2	H11_clonotype1304	1	TRB:CASTGGTEVFF;TRA:CALSPSNTNKVVF
clone_475_seq_2	H11_clonotype1306	1	TRB:CASGDVYEQYF;TRA:CALSPPSGSWQLIF
clone_476_seq_2	H11_clonotype1307	1	TRB:CASSLDQAPLF;TRA:CAVSPTSGGNYKPTF
clone_477_seq_2	H11_clonotype1308	1	TRB:CASSLGDTLYF;TRA:CAVRDTGANTGKLTF
clone_478_seq_2	H11_clonotype1309	1	TRB:CASGEIYEQYF;TRA:CALSRNNYAQGLTF
clone_479_seq_2	H11_clonotype1310	1	TRB:CASGETGGARDTQYF;TRA:CAAKAASLGKLQF
clone_480_seq_2	H11_clonotype1311	1	TRB:CASSINSDYTF;TRA:CAASVSGSWQLIF
clone_481_seq_2	H11_clonotype1313	1	TRB:CASGDSEDTQYF
clone_482_seq_2	H11_clonotype1314	1	TRB:CASGVQGYEQYF
clone_483_seq_2	H11_clonotype1315	1	TRB:CASSPTKNTLYF
clone_484_seq_2	H11_clonotype1316	1	TRB:CASSPTKNTLYF
clone_485_seq_2	H11_clonotype1318	1	TRB:CASSLWGGEQYF
clone_486_seq_2	H11_clonotype1320	1	TRB:CASGDGDYEQYF;TRA:CALERQGGRALIF;TRA:CAMREGISSGSWQLIF
clone_487_seq_2	H11_clonotype1321	1	TRB:CASGARNSPLYF;TRA:CARPSNNRIFF
clone_488_seq_2	H11_clonotype1322	1	TRB:CASGTGGFEQYF;TRA:CAAEAFSNYNVLYF;TRA:CAMERDYAQGLTF
clone_489_seq_2	H11_clonotype1323	1	TRB:CASSLGTGQLYF;TRA:CAIGRNSNNRIFF
clone_490_seq_2	H11_clonotype1324	1	TRB:CASGDWDYEQYF;TRA:CAASAGNTGKLIF;TRA:CAIDPAGSGGKLTL
clone_491_seq_2	H11_clonotype1325	1	TRB:CASGDAGYEQYF;TRA:CAIDLTGSGGKLTL
clone_492_seq_2	H11_clonotype1326	1	TRB:CASGDANTEVFF;TRA:CAVSMNTGNYKYVF
clone_493_seq_2	H11_clonotype1329	1	TRB:CASGEAGNTLYF;TRA:CVLSPPGNTGKLIF
clone_494_seq_2	H11_clonotype1330	1	TRB:CASSESQNTLYF;TRA:CAMERSGSWQLIF
clone_495_seq_2	H11_clonotype1331	1	TRB:CASSLAGREQYF;TRA:CALGPITGNTGKLIF;TRA:CALWERGSGGSNAKLTF
clone_496_seq_2	H11_clonotype1332	1	TRB:CASSTSQNTLYF;TRA:CALGENYAQGLTF
clone_497_seq_2	H11_clonotype1333	1	TRB:CASSSNTGQLYF;TRA:CAASASSGSWQLIF
clone_498_seq_2	H11_clonotype1334	1	TRB:CASGKGVYEQYF;TRA:CAASSGGSNYKLTF
clone_499_seq_2	H11_clonotype1335	1	TRA:CAARPDYSNNRLTL
clone_500_seq_2	H11_clonotype1336	1	TRA:CAASRDTNAYKVIF
clone_501_seq_2	H11_clonotype1337	1	TRA:CAASMQQGTGSKLSF
clone_502_seq_2	H11_clonotype1338	1	TRB:CASDPGQNQAPLF
clone_503_seq_2	H11_clonotype1339	1	TRB:CASDPGQNQAPLF
clone_504_seq_2	H11_clonotype1340	1	TRB:CASDPGQNQAPLF
clone_505_seq_2	H11_clonotype1341	1	TRB:CASGWDSQDTQYF
clone_506_seq_2	H11_clonotype1342	1	TRB:CASGRHNYAEQFF
clone_507_seq_2	H11_clonotype1344	1	TRB:CASSLDWGVEQYF
clone_508_seq_2	H11_clonotype1345	1	TRB:CASSATGAYEQYF
clone_509_seq_2	H11_clonotype1346	1	TRB:CASSPSYNSPLYF
clone_510_seq_2	H11_clonotype1348	1	TRB:CASSLGGGDEQYF
clone_511_seq_2	H11_clonotype1350	1	TRB:CASGTGRTERLFF;TRA:CAFNVGDNSKLIW
clone_512_seq_2	H11_clonotype1351	1	TRB:CASSPGHYAEQFF;TRA:CASHTEGADRLTF
clone_513_seq_2	H11_clonotype1352	1	TRB:CASSLGGEDTQYF;TRA:CILRVSGAGYQNFYF
clone_514_seq_2	H11_clonotype1353	1	TRB:CASGRDRDAEQFF;TRA:CAVSMYAYKVIF
clone_515_seq_2	H11_clonotype1354	1	TRB:CASSQDGQNTLYF;TRA:CAVSMMGYKLTF
clone_516_seq_2	H11_clonotype1355	1	TRB:CASSRDNYAEQFF;TRA:CALELGNAGAKLTF
clone_517_seq_2	H11_clonotype1356	1	TRB:CASSLGGGSDYTF;TRA:CASDTNAYKVIF
clone_518_seq_2	H11_clonotype1357	1	TRB:CASGVKYNSPLYF;TRA:CAVFSGGNYKPTF
clone_519_seq_2	H11_clonotype1358	1	TRB:CASGEGGQNTLYF;TRA:CASSNTNKVVF
clone_520_seq_2	H11_clonotype1360	1	TRB:CASSPTGYSDYTF;TRA:CAASTGGSNAKLTF
clone_521_seq_2	H11_clonotype1361	1	TRB:CASGDAGGDEQYF;TRA:CALWDSNYQLIW
clone_522_seq_2	H11_clonotype1362	1	TRB:CASGDKGSYEQYF;TRA:CAVGITGNTGKLIF
clone_523_seq_2	H11_clonotype1363	1	TRB:CASGATGDSDYTF;TRA:CAVSDYGSSGNKLIF
clone_524_seq_2	H11_clonotype1364	1	TRB:CASSLDNTGQLYF;TRA:CALSTEGADRLTF
clone_525_seq_2	H11_clonotype1365	1	TRB:CASSLGQGAEQFF;TRA:CAVSPRDYANKMIF
clone_526_seq_2	H11_clonotype1366	1	TRB:CASGDWGNAEQFF;TRA:CVVGNRGSALGRLHF
clone_527_seq_2	H11_clonotype1367	1	TRB:CASGQGAGNTLYF;TRA:CAMREGETSSFSKLVF
clone_528_seq_2	H11_clonotype1369	1	TRB:CASSLDNNSPLYF;TRA:CAASRWSNNRIFF
clone_529_seq_2	H11_clonotype1372	1	TRB:CASGDRGVPGQLYF
clone_530_seq_2	H11_clonotype1373	1	TRB:CASGESGGGTEVFF
clone_531_seq_2	H11_clonotype1374	1	TRB:CASGDRGGQDTQYF
clone_532_seq_2	H11_clonotype1375	1	TRB:CASGEPGDQDTQYF
clone_533_seq_2	H11_clonotype1376	1	TRB:CASGEPGDQDTQYF
clone_534_seq_2	H11_clonotype1377	1	TRB:CASGDADWGGEQYF
clone_535_seq_2	H11_clonotype1378	1	TRB:CASGDAAVNTEVFF
clone_536_seq_2	H11_clonotype1380	1	TRB:CASGDAGGGHTLYF
clone_537_seq_2	H11_clonotype1381	1	TRB:CASGDLKGAETLYF
clone_538_seq_2	H11_clonotype1382	1	TRB:CASGGGGQNTEVFF
clone_539_seq_2	H11_clonotype1384	1	TRB:CASGGRENTGQLYF
clone_540_seq_2	H11_clonotype1387	1	TRB:CASSLGGANSDYTF
clone_541_seq_2	H11_clonotype1388	1	TRB:CASSLGGSAETLYF
clone_542_seq_2	H11_clonotype1389	1	TRB:CASSLGTASYEQYF
clone_543_seq_2	H11_clonotype1390	1	TRB:CASSPTGANTEVFF
clone_544_seq_2	H11_clonotype1391	1	TRB:CASSRGQDNTEVFF
clone_545_seq_2	H11_clonotype1392	1	TRB:CASSLQGDQDTQYF
clone_546_seq_2	H11_clonotype1393	1	TRB:CASSLDWGQNTLYF
clone_547_seq_2	H11_clonotype1394	1	TRB:CASSGDWGEDTQYF
clone_548_seq_2	H11_clonotype1395	1	TRB:CASGGDRTNERLFF;TRA:CAMLQGGRALIF
clone_549_seq_2	H11_clonotype1396	1	TRB:CASSLTGGNSDYTF;TRA:CAAASGSWQLIF
clone_550_seq_2	H11_clonotype1397	1	TRB:CASSFGGYQDTQYF;TRA:CAMMDSNYQLIW
clone_551_seq_2	H11_clonotype1398	1	TRB:CASGPGSYNSPLYF;TRA:CAFNVGDNSKLIW
clone_552_seq_2	H11_clonotype1399	1	TRB:CASGEGDSGNTLYF;TRA:CAAATSSGQKLVF
clone_553_seq_2	H11_clonotype1400	1	TRB:CASGDTGQGYEQYF;TRA:CALERNAGAKLTF
clone_554_seq_2	H11_clonotype1401	1	TRB:CASGDRGSAETLYF;TRA:CAVDTNKVVF
clone_555_seq_2	H11_clonotype1402	1	TRB:CASGDIGGQDTQYF;TRA:CAVSESYQLIW
clone_556_seq_2	H11_clonotype1403	1	TRB:CASGDAGVGTEVFF;TRA:CALERNAGAKLTF
clone_557_seq_2	H11_clonotype1404	1	TRB:CASGDAWGQNTLYF;TRA:CAMGGANTGKLTF
clone_558_seq_2	H11_clonotype1405	1	TRB:CASGDAGGAIEQYF;TRA:CALERNAGAKLTF;TRA:CATFNSGGSNAKLTF
clone_559_seq_2	H11_clonotype1406	1	TRB:CASSLEGVSYEQYF;TRA:CILRAIQGGSAKLIF
clone_560_seq_2	H11_clonotype1407	1	TRB:CASSPGQGNERLFF;TRA:CAVRSNNRIFF
clone_561_seq_2	H11_clonotype1408	1	TRB:CASGDGGAGNTLYF;TRA:CATDNAGAKLTF
clone_562_seq_2	H11_clonotype1409	1	TRB:CASGDASYNSPLYF;TRA:CAAGYTEGADRLTF
clone_563_seq_2	H11_clonotype1410	1	TRB:CASSPGWGSAEQFF;TRA:CAVRNSNNRIFF;TRA:CAVSMNYNQGKLIF
clone_564_seq_2	H11_clonotype1411	1	TRB:CASGETGTGDTQYF;TRA:CAASTGSGGKLTL
clone_565_seq_2	H11_clonotype1412	1	TRB:CASGDKGGNTEVFF;TRA:CAASTNSGTYQRF
clone_566_seq_2	H11_clonotype1413	1	TRB:CASSLQISNERLFF;TRA:CAAGPFAGAKLTF;TRA:CVLSGPNTNKVVF
clone_567_seq_2	H11_clonotype1414	1	TRB:CASSLRQGRGEQYF;TRA:CATTTASLGKLQF
clone_568_seq_2	H11_clonotype1416	1	TRB:CASGEGTKNSDYTF;TRA:CALPRGSALGRLHF
clone_569_seq_2	H11_clonotype1417	1	TRB:CASGDAGQGDTQYF;TRA:CAASLNTNTGKLTF
clone_570_seq_2	H11_clonotype1418	1	TRB:CASGGRGLNSPLYF;TRA:CAVALSNYNVLYF
clone_571_seq_2	H11_clonotype1419	1	TRB:CASSPQGFNERLFF;TRA:CAVITGNTGKLIF
clone_572_seq_2	H11_clonotype142	1	TRB:CASSLDRGPSDYTF;TRA:CAAETNSAGNKLTF;TRA:CAASARDTNAYKVIF
clone_573_seq_2	H11_clonotype1420	1	TRB:CASSLGGSNERLFF;TRA:CALSGATNAYKVIF;TRA:CAMRETGSGGKLTL
clone_574_seq_2	H11_clonotype1421	1	TRB:CASSLGTGNSPLYF;TRA:CALRRNSNNRIFF
clone_575_seq_2	H11_clonotype1422	1	TRB:CASSPRTGSDTQYF;TRA:CVLSGDYNQGKLIF
clone_576_seq_2	H11_clonotype1423	1	TRB:CASSLGLGENTLYF;TRA:CAVRIASSSFSKLVF
clone_577_seq_2	H11_clonotype1424	1	TRB:CASSLGQNTGQLYF;TRA:CAVIPGTQVVGQLTF
clone_578_seq_2	H11_clonotype1425	1	TRB:CASGETGGGNTLYF;TRA:CALRGGNTGKLIF
clone_579_seq_2	H11_clonotype1426	1	TRB:CASGDLGGYAEQFF;TRA:CAVRDYNVGDNSKLIW
clone_580_seq_2	H11_clonotype1427	1	TRB:CASSLAVGQNTLYF;TRA:CALGDSSGSWQLIF
clone_581_seq_2	H11_clonotype1428	1	TRB:CASSLEKDWGEQYF;TRA:CALGEKGSFNKLTF
clone_582_seq_2	H11_clonotype1429	1	TRB:CASGDPGGAFEQYF;TRA:CALSDWTNAYKVIF
clone_583_seq_2	H11_clonotype1430	1	TRB:CASGDAQGQNTLYF;TRA:CALSVNSAGNKLTF
clone_584_seq_2	H11_clonotype1431	1	TRB:CASGDGTGKNTLYF;TRA:CVVGDRGSALGRLHF
clone_585_seq_2	H11_clonotype1433	1	TRB:CASAPKGSGNTLYF;TRA:CALEGSPGGSNAKLTF
clone_586_seq_2	H11_clonotype1434	1	TRB:CASSQDWEQNTLYF;TRA:CALSLNVGDNSKLIW
clone_587_seq_2	H11_clonotype1435	1	TRB:CASSPGHSGNTLYF;TRA:CALSGYGSSGNKLIF
clone_588_seq_2	H11_clonotype1436	1	TRB:CASSLQGRDSDYTF;TRA:CALSDSSGSWQLIF
clone_589_seq_2	H11_clonotype1437	1	TRB:CASSQDWGVYEQYF;TRA:CAMRGNGGSNYKLTF
clone_590_seq_2	H11_clonotype1438	1	TRB:CASSLRGEEDTQYF;TRA:CAMRELNTGYQNFYF
clone_591_seq_2	H11_clonotype1439	1	TRB:CASSLVQTNTEVFF;TRA:CAASANSGTYQRF;TRA:CASPTTSSGQKLVF
clone_592_seq_2	H11_clonotype1440	1	TRB:CASSLDRGGDTQYF;TRA:CAAHMDYANKMIF
clone_593_seq_2	H11_clonotype1441	1	TRB:CASLQGANTGQLYF;TRA:CAARGNSNNRIFF
clone_594_seq_2	H11_clonotype1442	1	TRB:CASGDAGGKDEQYF;TRA:CAASDTNAYKVIF
clone_595_seq_2	H11_clonotype1444	1	TRB:CASGGTTDNERLFF;TRA:CAARDTGNYKYVF
clone_596_seq_2	H11_clonotype1445	1	TRB:CASSLKGDGNTLYF;TRA:CAASANSGTYQRF
clone_597_seq_2	H11_clonotype1446	1	TRB:CASSLGTSAETLYF;TRA:CAASRNSNNRIFF
clone_598_seq_2	H11_clonotype1447	1	TRB:CASGSGTGDTGQLYF
clone_599_seq_2	H11_clonotype1448	1	TRB:CASGEGGANTGQLYF
clone_600_seq_2	H11_clonotype1449	1	TRB:CASGEGGANTGQLYF
clone_601_seq_2	H11_clonotype1450	1	TRB:CASGDARAYNSPLYF
clone_602_seq_2	H11_clonotype1451	1	TRB:CASGDARAYNSPLYF
clone_603_seq_2	H11_clonotype1452	1	TRB:CASGDAGTGGYEQYF
clone_604_seq_2	H11_clonotype1453	1	TRB:CASGDAKGPNSDYTF
clone_605_seq_2	H11_clonotype1454	1	TRB:CASGARLGNSYEQYF
clone_606_seq_2	H11_clonotype1455	1	TRB:CASSPDWASQNTLYF
clone_607_seq_2	H11_clonotype1457	1	TRB:CASSRDRSNTGQLYF
clone_608_seq_2	H11_clonotype1458	1	TRB:CASSPLRNSGNTLYF
clone_609_seq_2	H11_clonotype1459	1	TRB:CASSPGTGGVYEQYF
clone_610_seq_2	H11_clonotype1460	1	TRB:CASSLSGDGAETLYF
clone_611_seq_2	H11_clonotype1461	1	TRB:CASGGSGGSSYEQYF;TRA:CAIDSNYQLIW
clone_612_seq_2	H11_clonotype1462	1	TRB:CASGDIAINQDTQYF;TRA:CAAVTGGYKVVF
clone_613_seq_2	H11_clonotype1463	1	TRB:CASGDADKSNSDYTF;TRA:CAAGDSNYQLIW
clone_614_seq_2	H11_clonotype1464	1	TRB:CASGGDWGSQNTLYF;TRA:CAIDPYANKMIF
clone_615_seq_2	H11_clonotype1465	1	TRB:CASSPGGTSAETLYF;TRA:CAAEGSNYQLIW
clone_616_seq_2	H11_clonotype1466	1	TRB:CASGDPGGNYAEQFF;TRA:CALERNAGAKLTF
clone_617_seq_2	H11_clonotype1467	1	TRB:CASGDPGGQGDTQYF;TRA:CALERNAGAKLTF
clone_618_seq_2	H11_clonotype1468	1	TRB:CASGGRGGRFYEQYF;TRA:CATDSNYQLIW
clone_619_seq_2	H11_clonotype1469	1	TRB:CASSDRQGSGNTLYF;TRA:CATDSGTYQRF
clone_620_seq_2	H11_clonotype1470	1	TRB:CASGTSGTGGYEQYF;TRA:CAANTNTGKLTF
clone_621_seq_2	H11_clonotype1471	1	TRB:CASSLRDWGGDTQYF;TRA:CAIVRPSSFSKLVF
clone_622_seq_2	H11_clonotype1472	1	TRB:CASSLVGGSNSDYTF;TRA:CAVSRGGRALIF
clone_623_seq_2	H11_clonotype1473	1	TRB:CASGDAGDRGYEQYF;TRA:CAASMRVYAQGLTF;TRA:CALKSNNRIFF
clone_624_seq_2	H11_clonotype1474	1	TRB:CASGAPGQGNERLFF;TRA:CAVSMTSGTYQRF
clone_625_seq_2	H11_clonotype1475	1	TRB:CASGARTGGDSDYTF;TRA:CAVSTYQGGRALIF
clone_626_seq_2	H11_clonotype1476	1	TRB:CASSPFRDNQDTQYF;TRA:CAMRVDTGYQNFYF
clone_627_seq_2	H11_clonotype1477	1	TRB:CASGDARGYNSPLYF;TRA:CAASGTGGLSGKLTF
clone_628_seq_2	H11_clonotype1478	1	TRB:CASSSRTGGAETLYF;TRA:CAVSPSSGSWQLIF
clone_629_seq_2	H11_clonotype1479	1	TRB:CASSLKGQGSSDYTF;TRA:CAVLQQGTGSKLSF
clone_630_seq_2	H11_clonotype1480	1	TRB:CASSGTGVGNSPLYF;TRA:CAVSARDTNAYKVIF
clone_631_seq_2	H11_clonotype1481	1	TRB:CASSRDWGSQNTLYF;TRA:CALSGKGTGSKLSF
clone_632_seq_2	H11_clonotype1483	1	TRB:CASSLWGANTGQLYF;TRA:CAAPNTEGADRLTF
clone_633_seq_2	H11_clonotype1484	1	TRB:CASSLGNSYNSPLYF;TRA:CALASSGSWQLIF
clone_634_seq_2	H11_clonotype1485	1	TRB:CASGPRDRNNQAPLF;TRA:CALRMATGGNNKLTF
clone_635_seq_2	H11_clonotype1486	1	TRB:CASGDAGTGGETLYF;TRA:CVVGDRGSALGRLHF
clone_636_seq_2	H11_clonotype1487	1	TRB:CASGGTGGNYAEQFF;TRA:CALSVYQGGRALIF
clone_637_seq_2	H11_clonotype1488	1	TRB:CASSRPDRRGDTQYF;TRA:CVLSAMNTEGADRLTF
clone_638_seq_2	H11_clonotype1489	1	TRB:CASSPGTTNTGQLYF;TRA:CALSDTSSGQKLVF
clone_639_seq_2	H11_clonotype1490	1	TRB:CASGDVSGGAREQYF;TRA:CALVDMNYNQGKLIF
clone_640_seq_2	H11_clonotype1491	1	TRB:CASGASGTGNYEQYF;TRA:CAVREMATGGNNKLTF
clone_641_seq_2	H11_clonotype1492	1	TRB:CASSPLGGYYAEQFF;TRA:CALSETTASLGKLQF
clone_642_seq_2	H11_clonotype1493	1	TRB:CASSLGGASQNTLYF;TRA:CAAPSSFSKLVF
clone_643_seq_2	H11_clonotype1494	1	TRB:CASSLETHSAETLYF;TRA:CAAGASNYQLIW
clone_644_seq_2	H11_clonotype1495	1	TRB:CASGDATGGQNTLYF;TRA:CAARRSNNRLTL
clone_645_seq_2	H11_clonotype1496	1	TRB:CASGDAGASQNTLYF;TRA:CAATTGYQNFYF
clone_646_seq_2	H11_clonotype1497	1	TRA:CALRLNNNNAPRF
clone_647_seq_2	H11_clonotype1498	1	TRB:CASGDGGGAANERLFF
clone_648_seq_2	H11_clonotype1499	1	TRB:CASSPRTGGNYAEQFF
clone_649_seq_2	H11_clonotype1500	1	TRB:CASSLYWGDNYAEQFF;TRA:CAIDTNAYKVIF
clone_650_seq_2	H11_clonotype1501	1	TRB:CASGDDPGTGQNTLYF;TRA:CAAPGSALGRLHF
clone_651_seq_2	H11_clonotype1502	1	TRB:CASSPRTGGYNSPLYF;TRA:CAVPLPGTGSNRLTF;TRA:CAVSQGGRALIF
clone_652_seq_2	H11_clonotype1503	1	TRB:CASSLLGGPSAETLYF;TRA:CALTGSGGKLTL
clone_653_seq_2	H11_clonotype1504	1	TRB:CASSLGGLLSAETLYF;TRA:CALSDRGYKLTF
clone_654_seq_2	H11_clonotype1505	1	TRB:CASGDAGGANTGQLYF;TRA:CAASRDSGYNKLTF
clone_655_seq_2	H11_clonotype1506	1	TRB:CASGDAPGSSQNTLYF;TRA:CAASELNYNQGKLIF
clone_656_seq_2	H11_clonotype1507	1	TRB:CASGDARRVGAETLYF;TRA:CAVSRNYGSSGNKLIF
clone_657_seq_2	H11_clonotype1508	1	TRB:CASGDEGLGGAETLYF;TRA:CAASPDYANKMIF
clone_658_seq_2	H11_clonotype1509	1	TRB:CASGDRTGGAVQNTLYF
clone_659_seq_2	H11_clonotype1510	1	TRB:CASGDQGTGGSQNTLYF;TRA:CALSDRGQGKLIF
clone_660_seq_2	H11_clonotype1511	1	TRB:CASGDRGPGGAPREQYF;TRA:CALGVYNTNTGKLTF;TRA:CALMNYNQGKLIF
clone_661_seq_2	H11_clonotype1513	1	TRB:CASSLDWGGPSQNTLYF;TRA:CALGGGTGANTGKLTF
clone_662_seq_2	H11_clonotype1514	1	TRB:CASGDWSGPNSYNSPLYF;TRA:CAAITSGGNYKPTF
clone_663_seq_2	H11_clonotype1515	1	TRB:CASSPSTGRRDGQNTLYF;TRA:CALSDMSNYNVLYF
clone_664_seq_2	H11_clonotype165	1	TRB:CASSDGDWGEQYF;TRA:CALEPTGNTGKLIF
clone_665_seq_2	H11_clonotype167	1	TRB:CASSLETLYF;TRA:CAMVLNSGGSNAKLTF;TRA:CAVSAGGSNAKLTF
clone_666_seq_2	H11_clonotype169	1	TRB:CGARDWGSSYEQYF;TRA:CAATANTGANTGKLTF;TRA:CALSGNNRIFF
clone_667_seq_2	H11_clonotype170	1	TRB:CASSQEGGGYEQYF;TRA:CAANTGGNNKLTF
clone_668_seq_2	H11_clonotype172	1	TRB:CASSLDNYEQYF;TRA:CALSYLSGSFNKLTF
clone_669_seq_2	H11_clonotype173	1	TRB:CASSRASSYEQYF;TRA:CAASGANTGKLTF
clone_670_seq_2	H11_clonotype176	1	TRB:CASSDHRGENTLYF;TRA:CAIDANKMIF
clone_671_seq_2	H11_clonotype180	1	TRB:CASRLGGYEQYF;TRA:CAVSFTGANTGKLTF
clone_672_seq_2	H11_clonotype181	1	TRB:CASRKDWGGFYEQYF;TRB:CASSQEGGSYEQYF;TRA:CAASEDQGGSAKLIF
clone_673_seq_2	H11_clonotype183	1	TRB:CASSDAGTDYAEQFF;TRA:CAASRPGSGGKLTL
clone_674_seq_2	H11_clonotype184	1	TRB:CASSQETRGQYF;TRA:CAVSINTGNYKYVF
clone_675_seq_2	H11_clonotype186	1	TRB:CASSRDRGQDTQYF;TRA:CALRPSGSWQLIF
clone_676_seq_2	H11_clonotype187	1	TRB:CASRTGTGGAQDTQYF;TRA:CALPITGNTGKLIF;TRA:CAVSHSNTNKVVF
clone_677_seq_2	H11_clonotype195	1	TRB:CASSLHRDANTEVFF;TRA:CAASAGMGYKLTF
clone_678_seq_2	H11_clonotype198	1	TRB:CASSPDWVNQDTQYF;TRA:CALGSSGSWQLIF
clone_679_seq_2	H11_clonotype199	1	TRB:CTCSEGQAERLFF;TRA:CALRTTASLGKLQF;TRA:CAPSMSNYNVLYF
clone_680_seq_2	H11_clonotype206	1	TRB:CASSFHRGDERLFF;TRB:CASSSSGQANQAPLF;TRA:CALGDPNSGTYQRF
clone_681_seq_2	H11_clonotype207	1	TRB:CASSPTASAETLYF;TRA:CAARRSGGSNAKLTF
clone_682_seq_2	H11_clonotype219	1	TRB:CASSILGGYAEQFF;TRA:CALSLTGFASALTF
clone_683_seq_2	H11_clonotype223	1	TRB:CTCSAVTTNTGQLYF;TRA:CAAEAGNTGKLIF
clone_684_seq_2	H11_clonotype227	1	TRB:CASGDGGGEVFF;TRA:CAMEVETGFASALTF;TRA:CAVRPSNQGGSAKLIF
clone_685_seq_2	H11_clonotype231	1	TRB:CASGETANSDYTF;TRA:CAMGGNYAQGLTF
clone_686_seq_2	H11_clonotype237	1	TRB:CASGGGQGENSPLYF;TRA:CVRNNAGAKLTF
clone_687_seq_2	H11_clonotype239	1	TRB:CAWGRGEVFF
clone_688_seq_2	H11_clonotype240	1	TRB:CAWGRGEVFF
clone_689_seq_2	H11_clonotype241	1	TRB:CAWGRGEVFF
clone_690_seq_2	H11_clonotype242	1	TRB:CAWGRGEVFF
clone_691_seq_2	H11_clonotype244	1	TRB:CAWSLRYEQYF;TRA:CALSGGGSNAKLTF;TRA:CAVSGNYNQGKLIF
clone_692_seq_2	H11_clonotype245	1	TRB:CASSGRDTQYF;TRB:CAWSPGVYAEQFF;TRA:CAVSPGGSNAKLTF
clone_693_seq_2	H11_clonotype246	1	TRB:CASSDTAEVFF;TRA:CAASRNSNNRIFF
clone_694_seq_2	H11_clonotype247	1	TRB:CARTYAEQFF
clone_695_seq_2	H11_clonotype248	1	TRA:CAALLSNYQLIW
clone_696_seq_2	H11_clonotype250	1	TRA:CAANTGYQNFYF
clone_697_seq_2	H11_clonotype253	1	TRB:CAWSPGGDTLYF
clone_698_seq_2	H11_clonotype254	1	TRB:CAWSPGGDTLYF
clone_699_seq_2	H11_clonotype255	1	TRB:CASSDTRDEQYF
clone_700_seq_2	H11_clonotype256	1	TRB:CASSDDKNTLYF
clone_701_seq_2	H11_clonotype258	1	TRB:CASSAGTKTLYF
clone_702_seq_2	H11_clonotype259	1	TRB:CGAREGNTEVFF
clone_703_seq_2	H11_clonotype260	1	TRB:CGARGQYAEQFF
clone_704_seq_2	H11_clonotype261	1	TRB:CGAQISQNTLYF
clone_705_seq_2	H11_clonotype263	1	TRB:CACRLGGGEQYF;TRB:CASSENTLYF;TRA:CAPLNTGNYKYVF
clone_706_seq_2	H11_clonotype264	1	TRB:CASRDSAETLYF;TRB:CASSLDTNTEVFF;TRA:CAAEPTGGNNKLTF;TRA:CILRDSGGSNYKLTF
clone_707_seq_2	H11_clonotype265	1	TRB:CGARDNNERLFF;TRA:CAAEATGGYKVVF
clone_708_seq_2	H11_clonotype266	1	TRB:CASRDWGYEQYF;TRA:CAAENTEGADRLTF
clone_709_seq_2	H11_clonotype267	1	TRB:CGAKTGNERLFF;TRA:CAVSLTGSGGKLTL
clone_710_seq_2	H11_clonotype268	1	TRB:CGARPGGASQYF;TRA:CAASDNTNTGKLTF
clone_711_seq_2	H11_clonotype269	1	TRB:CGAREGADTQYF;TRA:CALSDLSGNEKITF
clone_712_seq_2	H11_clonotype270	1	TRB:CASRGGQNTLYF;TRA:CVVGATNTGKLTF
clone_713_seq_2	H11_clonotype271	1	TRB:CASSERGDEQYF;TRB:CASSPSGTGGGNTLYF;TRA:CAASSGGNYKPTF;TRA:CALSASSNMGYKLTF
clone_714_seq_2	H11_clonotype272	1	TRB:CASSAYRDTSGNTLYF;TRB:CGVTDSGNTLYF;TRA:CAASEGMGYKLTF;TRA:CAVSMLSGSFNKLTF
clone_715_seq_2	H11_clonotype273	1	TRB:CAWSLTGGAPLF;TRA:CAASPNSGGSNAKLTF
clone_716_seq_2	H11_clonotype274	1	TRB:CASGGTSEVFF;TRA:CAVSPNTGYQNFYF
clone_717_seq_2	H11_clonotype275	1	TRB:CASSSDTYEQYF;TRA:CALSDRFGSWQLIF
clone_718_seq_2	H11_clonotype276	1	TRB:CGARDTANTLYF;TRA:CAASGGTGGYKVVF;TRA:CAVSAGTQVVGQLTF
clone_719_seq_2	H11_clonotype279	1	TRA:CAFNVGDNSKLIW
clone_720_seq_2	H11_clonotype280	1	TRA:CALERNAGAKLTF
clone_721_seq_2	H11_clonotype281	1	TRB:CASSSQREQYF
clone_722_seq_2	H11_clonotype282	1	TRA:CAAAMSNYNVLYF
clone_723_seq_2	H11_clonotype283	1	TRA:CAAAMSNYNVLYF
clone_724_seq_2	H11_clonotype284	1	TRA:CAYYSNNRLTL
clone_725_seq_2	H11_clonotype285	1	TRB:CAWRDNSAETLYF
clone_726_seq_2	H11_clonotype286	1	TRB:CAWSLRGGAEVFF
clone_727_seq_2	H11_clonotype287	1	TRB:CAWSLSANTEVFF
clone_728_seq_2	H11_clonotype291	1	TRB:CASSEGHSYEQYF
clone_729_seq_2	H11_clonotype292	1	TRB:CASSGQGNTEVFF
clone_730_seq_2	H11_clonotype293	1	TRB:CASSGGPQNTLYF
clone_731_seq_2	H11_clonotype294	1	TRB:CGARGVPYAEQFF
clone_732_seq_2	H11_clonotype295	1	TRB:CASGDWGDEQYF;TRA:CIVTDSAGNKLTF
clone_733_seq_2	H11_clonotype297	1	TRB:CAWSLGTNTEVFF;TRA:CILRLQGTGSKLSF
clone_734_seq_2	H11_clonotype298	1	TRB:CASSLREVFF;TRA:CAADTGYQNFYF
clone_735_seq_2	H11_clonotype299	1	TRB:CGARGRAGSDYTF;TRA:CASFYSNYQLIW
clone_736_seq_2	H11_clonotype300	1	TRB:CAWRGQGNERLFF;TRA:CAVRDNNAPRF
clone_737_seq_2	H11_clonotype301	1	TRB:CATGTGNTEVFF;TRA:CIVTHASSGSWQLIF
clone_738_seq_2	H11_clonotype302	1	TRB:CASSELGGPEQYF;TRA:CAVRGNMGYKLTF
clone_739_seq_2	H11_clonotype303	1	TRB:CGARDWGLDTQYF;TRA:CIVTDRGSALGRLHF
clone_740_seq_2	H11_clonotype304	1	TRB:CGARAGSQNTLYF;TRA:CAYSGGSNAKLTF
clone_741_seq_2	H11_clonotype305	1	TRB:CASGDNNERLFF;TRA:CAAEAETGGYKVVF
clone_742_seq_2	H11_clonotype307	1	TRB:CAWSARGGSPLYF;TRA:CALSDTNTGANTGKLTF;TRA:CAVRVDSNYQLIW
clone_743_seq_2	H11_clonotype308	1	TRB:CASSDSGYEQYF;TRA:CAAESPNTGYQNFYF
clone_744_seq_2	H11_clonotype310	1	TRB:CASSEEGHTEVFF;TRB:CASSLRLGGYAEQFF;TRA:CAARNNAGAKLTF;TRA:CAMREAYQGGRALIF
clone_745_seq_2	H11_clonotype311	1	TRB:CASSEEGHTEVFF;TRA:CAARNNAGAKLTF
clone_746_seq_2	H11_clonotype313	1	TRB:CASSGTAKETLYF;TRA:CAASNNSNNRIFF
clone_747_seq_2	H11_clonotype314	1	TRB:CGAKTGRNTEVFF;TRA:CAVRSTGGYKVVF
clone_748_seq_2	H11_clonotype315	1	TRB:CGAKDNSGNTLYF;TRA:CAAEAYQGGSAKLIF
clone_749_seq_2	H11_clonotype316	1	TRB:CGARVPGSYEQYF;TRA:CALSDDSNNRIFF
clone_750_seq_2	H11_clonotype317	1	TRB:CASSRDRGEVFF;TRA:CALSMSNYNVLYF
clone_751_seq_2	H11_clonotype319	1	TRB:CASSTGDEQYF;TRA:CAVSESSGYNKLTF
clone_752_seq_2	H11_clonotype320	1	TRB:CASGDGYQAPLF;TRB:CASSGQNTEVFF;TRA:CAVVPGTGSNRLTF
clone_753_seq_2	H11_clonotype321	1	TRB:CASGDAAPDYTF;TRA:CAANTNSAGNKLTF
clone_754_seq_2	H11_clonotype322	1	TRB:CASGDGGHEQYF;TRA:CAPMRNNNNAPRF
clone_755_seq_2	H11_clonotype323	1	TRB:CASSQGAYAEQFF;TRA:CVFPDYSNNRLTL
clone_756_seq_2	H11_clonotype324	1	TRB:CASSEGHRGNSPLYF;TRB:CASSGQGNERLFF;TRA:CAVSSPSNTNKVVF
clone_757_seq_2	H11_clonotype325	1	TRB:CSSRVGTNTEVFF;TRA:CAMRYNSAGNKLTF
clone_758_seq_2	H11_clonotype327	1	TRB:CGARDRNTGQLYF;TRA:CAASEREAGAKLTF
clone_759_seq_2	H11_clonotype328	1	TRB:CASSHSGNTLYF;TRA:CVLSANYGNEKITF
clone_760_seq_2	H11_clonotype329	1	TRB:CASSQDPGVTSGNTLYF;TRB:CASSRSQNTLYF;TRA:CAASEPGGSNYQLIW
clone_761_seq_2	H11_clonotype330	1	TRB:CASGDRNTEVFF;TRA:CARTSGGNYKPTF
clone_762_seq_2	H11_clonotype331	1	TRB:CGAGTGANTEVFF;TRA:CALGDPNTNKVVF
clone_763_seq_2	H11_clonotype332	1	TRB:CGARTGGLYEQYF;TRA:CALSSNTNKVVF
clone_764_seq_2	H11_clonotype333	1	TRB:CASSPQGSGNTLYF;TRB:CGASRGVYAEQFF;TRA:CAVPRGGNYKYVF
clone_765_seq_2	H11_clonotype334	1	TRB:CGASWGNYAEQFF;TRA:CALRDVNTGNYKYVF
clone_766_seq_2	H11_clonotype335	1	TRB:CASSQVQNEQYF;TRA:CALSDRQGGRALIF
clone_767_seq_2	H11_clonotype336	1	TRB:CAWSQTGAYEQYF;TRA:CALGITGNTGKLIF
clone_768_seq_2	H11_clonotype337	1	TRB:CAWSQNSGNTLYF;TRA:CALSVSGGNYKPTF
clone_769_seq_2	H11_clonotype338	1	TRB:CASSNSFGNTLYF;TRA:CVLTLTSGGNYKPTF
clone_770_seq_2	H11_clonotype339	1	TRB:CASSDTGGQAPLF;TRA:CALSRTSSGQKLVF
clone_771_seq_2	H11_clonotype342	1	TRB:CASSDRVTEVFF;TRA:CALALTGNTGKLIF
clone_772_seq_2	H11_clonotype343	1	TRB:CASSAGSSYEQYF;TRA:CALGNTNTGKLTF
clone_773_seq_2	H11_clonotype344	1	TRB:CASSLKYEQYF;TRA:CALGVSNTNKVVF
clone_774_seq_2	H11_clonotype345	1	TRB:CGALDWGSYEQYF;TRA:CALNVGDNSKLIW
clone_775_seq_2	H11_clonotype346	1	TRB:CAWSRQGNSPLYF;TRA:CALGDSSNYNVLYF
clone_776_seq_2	H11_clonotype347	1	TRB:CASSDHRASLFF;TRA:CAASDSSFSKLVF;TRA:CALRENQGGSAKLIF
clone_777_seq_2	H11_clonotype348	1	TRB:CASSWDWTAEQFF;TRA:CALGGNNYAQGLTF
clone_778_seq_2	H11_clonotype349	1	TRB:CGARPGGAETLYF;TRA:CAVSDMRGSSGNKLIF
clone_779_seq_2	H11_clonotype350	1	TRB:CGARDINQDTQYF;TRA:CALWELSSGSWQLIF;TRA:CAMREGMSNYNVLYF
clone_780_seq_2	H11_clonotype351	1	TRB:CGARQGGNTEVFF;TRA:CALGDRSGSWQLIF
clone_781_seq_2	H11_clonotype352	1	TRB:CASSDEDSPLYF;TRA:CAMREDLMDYANKMIF
clone_782_seq_2	H11_clonotype353	1	TRB:CASSLTGGDSDYTF;TRB:CASSQRDWEQYF;TRA:CAASAGGYKVVF
clone_783_seq_2	H11_clonotype354	1	TRB:CGARDSLNTEVFF;TRA:CAMRDPYGSSGNKLIF
clone_784_seq_2	H11_clonotype355	1	TRB:CASSDRQAEEVFF;TRA:CAASDYANKMIF
clone_785_seq_2	H11_clonotype356	1	TRB:CAWSLEQPYEQYF;TRA:CAASGGSFNKLTF
clone_786_seq_2	H11_clonotype357	1	TRB:CSSRTTWGERLFF;TRA:CAASANSNNRIFF
clone_787_seq_2	H11_clonotype358	1	TRB:CASSGDNQDTQYF;TRA:CALWELEDYQLIW
clone_788_seq_2	H11_clonotype360	1	TRA:CAASPGGRALIF
clone_789_seq_2	H11_clonotype361	1	TRA:CASSSNTNKVVF
clone_790_seq_2	H11_clonotype362	1	TRB:CASSRQNTEVFF
clone_791_seq_2	H11_clonotype363	1	TRB:CASSRQNTEVFF
clone_792_seq_2	H11_clonotype364	1	TRB:CASSQDGQYEQYF
clone_793_seq_2	H11_clonotype366	1	TRA:CAAEPMSNYNVLYF
clone_794_seq_2	H11_clonotype367	1	TRA:CAAEPMSNYNVLYF
clone_795_seq_2	H11_clonotype369	1	TRA:CAAEALSNYNVLYF
clone_796_seq_2	H11_clonotype370	1	TRA:CAAEALSNYNVLYF
clone_797_seq_2	H11_clonotype371	1	TRA:CAAEAFSNYNVLYF
clone_798_seq_2	H11_clonotype372	1	TRA:CAAEAMSNYNVLYF
clone_799_seq_2	H11_clonotype373	1	TRA:CVWGSNNRIFF
clone_800_seq_2	H11_clonotype374	1	TRB:CASGLGDSAETLYF
clone_801_seq_2	H11_clonotype375	1	TRB:CASGLGDSAETLYF
clone_802_seq_2	H11_clonotype376	1	TRB:CAWSRLGANSDYTF
clone_803_seq_2	H11_clonotype377	1	TRB:CAWSPWGGAHEQYF
clone_804_seq_2	H11_clonotype378	1	TRB:CAWSPWGGAHEQYF
clone_805_seq_2	H11_clonotype379	1	TRB:CAWSPWGGAHEQYF
clone_806_seq_2	H11_clonotype380	1	TRB:CAWSRTSSQNTLYF
clone_807_seq_2	H11_clonotype381	1	TRB:CAWSLTWGGGEQYF
clone_808_seq_2	H11_clonotype382	1	TRB:CAWSLAGMNTEVFF
clone_809_seq_2	H11_clonotype383	1	TRB:CASSSGERLFF
clone_810_seq_2	H11_clonotype384	1	TRB:CASGREAETLYF
clone_811_seq_2	H11_clonotype385	1	TRB:CASSIKDTQYF
clone_812_seq_2	H11_clonotype387	1	TRB:CASSHYAEQFF
clone_813_seq_2	H11_clonotype388	1	TRB:CASKDNSGNTLYF
clone_814_seq_2	H11_clonotype389	1	TRB:CASSETGENTLYF
clone_815_seq_2	H11_clonotype390	1	TRB:CASSSGTGDEQYF
clone_816_seq_2	H11_clonotype391	1	TRB:CASRDNISNERLFF
clone_817_seq_2	H11_clonotype392	1	TRB:CASSRDWGDAEQFF
clone_818_seq_2	H11_clonotype393	1	TRB:CASRAGENTGQLYF
clone_819_seq_2	H11_clonotype394	1	TRB:CASSELYNYAEQFF
clone_820_seq_2	H11_clonotype395	1	TRB:CASSDPGSNSDYTF
clone_821_seq_2	H11_clonotype396	1	TRB:CASSDRQDFTEVFF
clone_822_seq_2	H11_clonotype397	1	TRB:CASSDPGAQDTQYF
clone_823_seq_2	H11_clonotype398	1	TRB:CASSDEDRNSDYTF
clone_824_seq_2	H11_clonotype399	1	TRB:CASSDDSYNSPLYF
clone_825_seq_2	H11_clonotype401	1	TRB:CASSDLGSAETLYF
clone_826_seq_2	H11_clonotype402	1	TRB:CASSDLGSAETLYF
clone_827_seq_2	H11_clonotype403	1	TRB:CASSGPQGAYEQYF
clone_828_seq_2	H11_clonotype404	1	TRB:CGARKQGAHSDYTF
clone_829_seq_2	H11_clonotype409	1	TRB:CGVRDWGAQDTQYF
clone_830_seq_2	H11_clonotype410	1	TRB:CGVRDWGAQDTQYF
clone_831_seq_2	H11_clonotype411	1	TRB:CASSFSERLFF;TRA:CAIAPNYNVLYF
clone_832_seq_2	H11_clonotype412	1	TRB:CASRGDWVYEQYF;TRA:CIVTASSGSWQLIF
clone_833_seq_2	H11_clonotype413	1	TRB:CASSDGGLTDYTF;TRA:CAAVTNTGKLTF
clone_834_seq_2	H11_clonotype414	1	TRB:CASGLGDSAETLYF;TRB:CASRQGNSDYTF;TRA:CALERSNNNAPRF;TRA:CAVMTGNTGKLIF
clone_835_seq_2	H11_clonotype415	1	TRB:CASNRGDTQYF;TRA:CATNNNAGAKLTF
clone_836_seq_2	H11_clonotype416	1	TRB:CASSARQNTLYF;TRA:CIVTVTSYNQGKLIF
clone_837_seq_2	H11_clonotype417	1	TRB:CASSQRQFYEQYF;TRA:CAVSTNTGKLTF
clone_838_seq_2	H11_clonotype418	1	TRB:CASSRGTDEQYF;TRA:CATETNTGKLTF
clone_839_seq_2	H11_clonotype420	1	TRB:CGARDWGNTGQLYF;TRA:CAAGLTGGNNKLTF
clone_840_seq_2	H11_clonotype421	1	TRB:CGARDWGSSYEQYF;TRA:CATGNMGYKLTF
clone_841_seq_2	H11_clonotype422	1	TRB:CASSLVGYEQYF;TRA:CAAEGINTGNYKYVF
clone_842_seq_2	H11_clonotype423	1	TRB:CASSPRQQDTQYF;TRA:CAVSMTGGYKVVF
clone_843_seq_2	H11_clonotype424	1	TRB:CASSLEDIYEQYF;TRA:CAVTSSGSWQLIF
clone_844_seq_2	H11_clonotype425	1	TRB:CASSDAGTGGYEQYF;TRB:CAWSPWGGAHEQYF;TRA:CAAEVPTGGNNKLTF;TRA:CAVKGGTGGYKVVF
clone_845_seq_2	H11_clonotype426	1	TRB:CAWSFGGARAEQFF;TRA:CATFNYNQGKLIF
clone_846_seq_2	H11_clonotype427	1	TRB:CASSLGAEQFF;TRA:CAVSGPNTNKVVF
clone_847_seq_2	H11_clonotype428	1	TRB:CASSPRQGYEQYF;TRA:CATDDTNAYKVIF
clone_848_seq_2	H11_clonotype429	1	TRB:CASSDWGEDTQYF;TRA:CAAERATGGNNKLTF
clone_849_seq_2	H11_clonotype430	1	TRB:CASSETGENTLYF;TRB:CASSGTGVSYEQYF;TRA:CAASKGGTNAYKVIF;TRA:CAERTSSGQKLVF
clone_850_seq_2	H11_clonotype431	1	TRB:CGARQGKDTGQLYF;TRA:CAASPNSNNRIFF
clone_851_seq_2	H11_clonotype432	1	TRB:CGARSGTSAETLYF;TRA:CAVSDTNTGKLTF
clone_852_seq_2	H11_clonotype433	1	TRB:CGARGTSSGNTLYF;TRA:CAVSMYLGYKLTF
clone_853_seq_2	H11_clonotype434	1	TRB:CASSQEAGDTQYF;TRB:CASSYRGLEQYF;TRA:CAVRSNTGYQNFYF
clone_854_seq_2	H11_clonotype435	1	TRB:CAWSRTASAETLYF;TRA:CALRMSNYNVLYF
clone_855_seq_2	H11_clonotype438	1	TRB:CASSFRYEQYF;TRA:CATDDGYNQGKLIF
clone_856_seq_2	H11_clonotype439	1	TRB:CASSEGPQNTLYF;TRA:CAASPDTNAYKVIF
clone_857_seq_2	H11_clonotype440	1	TRB:CASSDFGGAREQYF;TRA:CAASLTGSGGKLTL
clone_858_seq_2	H11_clonotype441	1	TRB:CGARDWGSSYEQYF;TRA:CATDATEGADRLTF
clone_859_seq_2	H11_clonotype442	1	TRB:CGAREWGREDTQYF;TRA:CALAGSGGKLTL
clone_860_seq_2	H11_clonotype443	1	TRB:CASSQGWEQYF;TRA:CAARFYGSSGNKLIF
clone_861_seq_2	H11_clonotype444	1	TRB:CASRQEGTQYF;TRA:CAASMDSNNRIFF
clone_862_seq_2	H11_clonotype445	1	TRB:CASSDAGTGYEQYF;TRA:CALGSAGNKLTF;TRA:CAMREGPGGNYKPTF
clone_863_seq_2	H11_clonotype446	1	TRB:CASSGDINYAEQFF;TRA:CAVSEDYANKMIF
clone_864_seq_2	H11_clonotype447	1	TRB:CASSFGNSDYTF;TRA:CAMDSGTGSFNKLTF
clone_865_seq_2	H11_clonotype448	1	TRB:CGARDWGSSYEQYF;TRA:CALGHYGNEKITF
clone_866_seq_2	H11_clonotype449	1	TRB:CAWSLDRGNTEVFF;TRA:CALSADSNYQLIW
clone_867_seq_2	H11_clonotype450	1	TRB:CAVGQGRGVFF;TRA:CAASTDGSSGNKLIF;TRA:CAVSASSNYNVLYF
clone_868_seq_2	H11_clonotype451	1	TRB:CASSSGQNTEVFF;TRA:CAVTASSGSWQLIF
clone_869_seq_2	H11_clonotype452	1	TRB:CASSDWGSYEQYF;TRA:CAASVTASLGKLQF
clone_870_seq_2	H11_clonotype453	1	TRB:CASSDKGNSDYTF;TRA:CAASPSSGSWQLIF
clone_871_seq_2	H11_clonotype454	1	TRB:CASSDWGSSYEQYF;TRA:CAASLGNSGTYQRF
clone_872_seq_2	H11_clonotype455	1	TRB:CASPNRNSDYTF;TRB:CASRRDWGGSAETLYF;TRA:CVVGDRGSALGRLHF
clone_873_seq_2	H11_clonotype456	1	TRB:CASSDAGNSDYTF;TRA:CAVSAWGTGYQNFYF
clone_874_seq_2	H11_clonotype457	1	TRB:CASSGDSSYEQYF;TRB:CASSLDTAETLYF;TRA:CARPLSSNTNKVVF
clone_875_seq_2	H11_clonotype458	1	TRB:CASSAGQGVTEVFF;TRA:CVVGDRGSALGRLHF
clone_876_seq_2	H11_clonotype459	1	TRB:CASSFSQNTLYF;TRA:CAASMVKNYAQGLTF
clone_877_seq_2	H11_clonotype460	1	TRB:CASSQDPNQAPLF;TRA:CAASLMATGGNNKLTF
clone_878_seq_2	H11_clonotype461	1	TRB:CASSPTGNAEQFF;TRA:CAASNTNAYKVIF;TRA:CALTLVTNSAGNKLTF
clone_879_seq_2	H11_clonotype462	1	TRB:CASSRDWGYEQYF;TRA:CAMREGNTGNYKYVF
clone_880_seq_2	H11_clonotype463	1	TRB:CASDPGQNQAPLF;TRA:CAVRPPNQGGSAKLIF
clone_881_seq_2	H11_clonotype464	1	TRB:CASSDGRGQNTLYF;TRA:CAMREGYNQGKLIF
clone_882_seq_2	H11_clonotype468	1	TRB:CASSHNANTEVFF;TRA:CAASVGSNNRIFF
clone_883_seq_2	H11_clonotype470	1	TRB:CASSDRGDTEVFF;TRA:CAASRSTGNYKYVF
clone_884_seq_2	H11_clonotype471	1	TRB:CSSRHWGNQDTQYF;TRA:CALRGNEKITF
clone_885_seq_2	H11_clonotype473	1	TRB:CAWSLYPDIYEQYF;TRA:CALWELDTNAYKVIF
clone_886_seq_2	H11_clonotype474	1	TRB:CASSPRSSYEQYF;TRA:CALSLISGGSNAKLTF
clone_887_seq_2	H11_clonotype475	1	TRA:CAMRDYNQGKLIF
clone_888_seq_2	H11_clonotype476	1	TRB:CASSPSGQYEQYF
clone_889_seq_2	H11_clonotype478	1	TRB:CASSLPRNERLFF
clone_890_seq_2	H11_clonotype480	1	TRB:CASSQEGWGDEQYF
clone_891_seq_2	H11_clonotype481	1	TRB:CASSQVGQNTEVFF
clone_892_seq_2	H11_clonotype482	1	TRB:CASSQVGQNTEVFF
clone_893_seq_2	H11_clonotype483	1	TRB:CASSQVGQNTEVFF
clone_894_seq_2	H11_clonotype484	1	TRB:CASSQWRNYAEQFF
clone_895_seq_2	H11_clonotype485	1	TRB:CASSQGLGQDTQYF
clone_896_seq_2	H11_clonotype486	1	TRB:CASSPSGAQNTLYF
clone_897_seq_2	H11_clonotype487	1	TRA:CAVSGTNTGKLTF
clone_898_seq_2	H11_clonotype488	1	TRA:CAVSGTNTGKLTF
clone_899_seq_2	H11_clonotype489	1	TRA:CAFLSGSFNKLTF
clone_900_seq_2	H11_clonotype490	1	TRB:CAWSPGQTSAETLYF
clone_901_seq_2	H11_clonotype491	1	TRB:CAWSRGLGDYAEQFF
clone_902_seq_2	H11_clonotype492	1	TRB:CAWSLGTGGAETLYF
clone_903_seq_2	H11_clonotype493	1	TRB:CASSLRDSDYTF
clone_904_seq_2	H11_clonotype496	1	TRB:CASSLADAEQFF
clone_905_seq_2	H11_clonotype497	1	TRB:CASSLGAREVFF
clone_906_seq_2	H11_clonotype498	1	TRB:CASRYSSYEQYF
clone_907_seq_2	H11_clonotype499	1	TRB:CASSRQVNTEVFF
clone_908_seq_2	H11_clonotype503	1	TRB:CASRLGGYEQYF
clone_909_seq_2	H11_clonotype504	1	TRB:CASRLGGYEQYF
clone_910_seq_2	H11_clonotype505	1	TRB:CASRLGGYEQYF
clone_911_seq_2	H11_clonotype506	1	TRB:CASRLGGYEQYF
clone_912_seq_2	H11_clonotype507	1	TRB:CASSLEGGEQYF
clone_913_seq_2	H11_clonotype508	1	TRB:CASSLAGGEQFF
clone_914_seq_2	H11_clonotype509	1	TRB:CASSFGAETLYF
clone_915_seq_2	H11_clonotype510	1	TRB:CASSLQGGEQYF
clone_916_seq_2	H11_clonotype511	1	TRB:CASSPGQYEQYF
clone_917_seq_2	H11_clonotype512	1	TRB:CASSPGQYEQYF
clone_918_seq_2	H11_clonotype513	1	TRB:CASSRGQETLYF
clone_919_seq_2	H11_clonotype514	1	TRB:CASSLGGTEVFF
clone_920_seq_2	H11_clonotype515	1	TRB:CASSLGGTEVFF
clone_921_seq_2	H11_clonotype516	1	TRB:CASSLGGTEVFF
clone_922_seq_2	H11_clonotype517	1	TRB:CASSLGGTEVFF
clone_923_seq_2	H11_clonotype518	1	TRB:CASSLEGGTLYF
clone_924_seq_2	H11_clonotype519	1	TRB:CASSLGGDTQYF
clone_925_seq_2	H11_clonotype520	1	TRB:CASSFGFAEQFF
clone_926_seq_2	H11_clonotype521	1	TRB:CASNLGGGQNTLYF
clone_927_seq_2	H11_clonotype523	1	TRB:CASSRDWGVDTQYF
clone_928_seq_2	H11_clonotype524	1	TRB:CASSERQNNSPLYF
clone_929_seq_2	H11_clonotype525	1	TRB:CASSEGDANSDYTF
clone_930_seq_2	H11_clonotype526	1	TRB:CASSDAGSNERLFF
clone_931_seq_2	H11_clonotype527	1	TRB:CASSDGWGSYEQYF
clone_932_seq_2	H11_clonotype528	1	TRB:CASGGLGRYAEQFF
clone_933_seq_2	H11_clonotype529	1	TRB:CASGPLGGQNTLYF
clone_934_seq_2	H11_clonotype530	1	TRB:CASGDRRGGAEQFF
clone_935_seq_2	H11_clonotype531	1	TRB:CASGEGQGRNTLYF
clone_936_seq_2	H11_clonotype532	1	TRB:CASGDRGSAETLYF
clone_937_seq_2	H11_clonotype533	1	TRB:CASGDRGSAETLYF
clone_938_seq_2	H11_clonotype534	1	TRB:CASSDIRSNYAEQFF
clone_939_seq_2	H11_clonotype538	1	TRB:CASSGDRGRGTEVFF
clone_940_seq_2	H11_clonotype539	1	TRB:CASSGGQGSNERLFF
clone_941_seq_2	H11_clonotype540	1	TRB:CASSQTGATEVFF
clone_942_seq_2	H11_clonotype541	1	TRB:CASSQDRLNTLYF
clone_943_seq_2	H11_clonotype542	1	TRB:CASSYDNNQAPLF
clone_944_seq_2	H11_clonotype544	1	TRB:CASSYRDGTEVFF
clone_945_seq_2	H11_clonotype546	1	TRB:CTCSGDKEVFF
clone_946_seq_2	H11_clonotype547	1	TRB:CASSDAGSAETLYF;TRA:CAALDYSNNRLTL;TRA:CAIEGNNRIFF
clone_947_seq_2	H11_clonotype548	1	TRB:CASSSEQDTQYF;TRA:CALETNTNKVVF
clone_948_seq_2	H11_clonotype549	1	TRB:CASSLSGYEQYF;TRA:CALEPGSWQLIF
clone_949_seq_2	H11_clonotype550	1	TRB:CASSDTYNNQAPLF;TRA:CAIHQGGRALIF
clone_950_seq_2	H11_clonotype551	1	TRB:CASSSGAGNTLYF;TRA:CAARTNAYKVIF
clone_951_seq_2	H11_clonotype552	1	TRB:CASRLGQYAEQFF;TRA:CAFDSGYNKLTF
clone_952_seq_2	H11_clonotype553	1	TRB:CASSRGEVFF;TRA:CAIVNSAGNKLTF
clone_953_seq_2	H11_clonotype554	1	TRB:CASSHGGRSAETLYF;TRB:CASSLPRNERLFF;TRA:CAAEAMSNYNVLYF;TRA:CILRVVGTGYQNFYF
clone_954_seq_2	H11_clonotype555	1	TRB:CASSQERGRVEQFF;TRA:CAVRGNYQLIW
clone_955_seq_2	H11_clonotype556	1	TRB:CASREGISNERLFF;TRB:CASSQEAGGESQYF;TRA:CAIDPGGNYKPTF
clone_956_seq_2	H11_clonotype557	1	TRB:CASRKDWGGFYEQYF;TRB:CASSQEGGSYEQYF;TRA:CAAPSNMGYKLTF;TRA:CILRGPGGSNAKLTF
clone_957_seq_2	H11_clonotype558	1	TRB:CASRKDWGGFYEQYF;TRB:CASSQEGGSYEQYF;TRA:CAASEDQGGSAKLIF;TRA:CILRGPGGSNAKLTF
clone_958_seq_2	H11_clonotype559	1	TRB:CASSRDFYEQYF;TRA:CALEPTNAYKVIF
clone_959_seq_2	H11_clonotype561	1	TRB:CASSLGTTEVFF;TRA:CAAPTNYGNEKITF;TRA:CALESNYQLIW
clone_960_seq_2	H11_clonotype562	1	TRB:CASGEPGDQDTQYF;TRA:CALERNAGAKLTF
clone_961_seq_2	H11_clonotype563	1	TRB:CASSGDRGANERLFF;TRA:CAAERGGSAKLIF
clone_962_seq_2	H11_clonotype565	1	TRB:CASSQTGGRVQYF;TRA:CAIPNNYAQGLTF
clone_963_seq_2	H11_clonotype566	1	TRB:CASRGQLSAETLYF;TRB:CASSESGRDTQYF;TRA:CATDPTQVVGQLTF
clone_964_seq_2	H11_clonotype567	1	TRB:CASSPNWGQDTQYF;TRA:CAMEGIGTGSKLSF
clone_965_seq_2	H11_clonotype569	1	TRB:CAWSLGGLSYAEQFF;TRA:CAVYTGNYKYVF
clone_966_seq_2	H11_clonotype570	1	TRB:CASSLAGTGVFF;TRA:CAAEAGGSSGNKLIF;TRA:CAMGMNYNQGKLIF
clone_967_seq_2	H11_clonotype571	1	TRB:CASSLDRNTLYF;TRA:CAVLNSNNRIFF
clone_968_seq_2	H11_clonotype574	1	TRB:CASGDRVNNQAPLF;TRA:CALSGGAGAKLTF;TRA:CAVPGDNSKLIW
clone_969_seq_2	H11_clonotype576	1	TRB:CASSYWSAETLYF;TRA:CAIRTNSAGNKLTF
clone_970_seq_2	H11_clonotype577	1	TRB:CASSQDLGDAEQFF;TRA:CAASGTGSNRLTF;TRA:CALVANYNQGKLIF
clone_971_seq_2	H11_clonotype578	1	TRB:CAWTPLRVSGNTLYF;TRA:CAVSMWSNYQLIW
clone_972_seq_2	H11_clonotype579	1	TRB:CASSPGSYEQYF;TRA:CAMRDTNAYKVIF
clone_973_seq_2	H11_clonotype580	1	TRB:CASSLVRDEQYF;TRA:CAVTSNTGKLIF
clone_974_seq_2	H11_clonotype581	1	TRB:CASSFNRGEQYF;TRA:CAARGDSNYQLIW;TRA:CALSAHNYAQGLTF
clone_975_seq_2	H11_clonotype582	1	TRB:CASSPRRIQNTLYF;TRA:CAVSDNNAPRF
clone_976_seq_2	H11_clonotype584	1	TRB:CASSPNRDKEVFF;TRA:CAAATSSGQKLVF;TRA:CAASPSNTNKVVF
clone_977_seq_2	H11_clonotype585	1	TRB:CASKRQGSTEVFF;TRA:CAAEASGGSNYKLTF
clone_978_seq_2	H11_clonotype586	1	TRB:CTCSAGTVLFF;TRA:CAARGGSNAKLTF
clone_979_seq_2	H11_clonotype587	1	TRB:CASSQDLLGGTQYF;TRA:CAVQGGSAKLIF
clone_980_seq_2	H11_clonotype588	1	TRB:CASGDAEGREQYF;TRB:CASSQVGQNTEVFF;TRA:CAAEAKGDTGYQNFYF;TRA:CAVTYNNNAPRF
clone_981_seq_2	H11_clonotype589	1	TRB:CASSPGGRNTEVFF;TRB:CAWRTGVANTGQLYF;TRA:CATEISSSFSKLVF
clone_982_seq_2	H11_clonotype591	1	TRB:CAWGPSGINTGQLYF;TRA:CAVSASNYQLIW
clone_983_seq_2	H11_clonotype592	1	TRB:CASSPSSYEQYF;TRA:CAVSSNTNKVVF
clone_984_seq_2	H11_clonotype593	1	TRB:CASSPGNAEQFF;TRA:CVLRASNTNKVVF
clone_985_seq_2	H11_clonotype594	1	TRB:CASSSQNYEQYF;TRA:CALGEGNNRIFF
clone_986_seq_2	H11_clonotype595	1	TRB:CASSKASNTEVFF;TRB:CAWSLLTGGRAETLYF;TRA:CALGGQGGRALIF
clone_987_seq_2	H11_clonotype596	1	TRB:CASSFWGHEQYF;TRB:CASSRESGGEVNNQAPLF;TRA:CALEGRGYANKMIF;TRA:CAVSADGNEKITF
clone_988_seq_2	H11_clonotype597	1	TRB:CASRTRGGQNTLYF;TRA:CVLGVGTGGYKVVF
clone_989_seq_2	H11_clonotype598	1	TRB:CASRDWGGYAEQFF;TRA:CAASRVTNAYKVIF
clone_990_seq_2	H11_clonotype599	1	TRB:CASRWDRENTEVFF;TRA:CAPYQGGRALIF
clone_991_seq_2	H11_clonotype600	1	TRB:CASSGGTGGNTLYF;TRA:CAVSAAGYQNFYF
clone_992_seq_2	H11_clonotype601	1	TRB:CASRAGGLGTGQLYF;TRA:CVLSAGSNNRIFF
clone_993_seq_2	H11_clonotype602	1	TRB:CASSDPGGGGTPLYF;TRA:CAASMSSGSWQLIF
clone_994_seq_2	H11_clonotype603	1	TRB:CASSDAGTGGYEQYF;TRA:CAVKGGTGGYKVVF
clone_995_seq_2	H11_clonotype605	1	TRB:CTCSAAQEQYF;TRA:CAVSQGGRALIF
clone_996_seq_2	H11_clonotype607	1	TRB:CASSRQSNTEVFF;TRB:CAWGQFQGANSDYTF;TRA:CALGGLAGSFNKLTF;TRA:CALRTGGYKVVF
clone_997_seq_2	H11_clonotype608	1	TRB:CASSLFIYEQYF;TRA:CAAAPSGSWQLIF
clone_998_seq_2	H11_clonotype609	1	TRB:CASSLEGAEQFF;TRA:CALGRTGGYKVVF
clone_999_seq_2	H11_clonotype610	1	TRB:CASSLEGGEQYF;TRA:CALGRTGGYKVVF
clone_1000_seq_2	H11_clonotype611	1	TRB:CASSLRNTEVFF;TRA:CALRTLYSNNRLTL
clone_1001_seq_2	H11_clonotype612	1	TRB:CASSLSENTLYF;TRA:CAVRYNTNTGKLTF
clone_1002_seq_2	H11_clonotype613	1	TRB:CASSEREDQDTQYF;TRA:CALSDWNNNAPRF
clone_1003_seq_2	H11_clonotype614	1	TRB:CASSDWGGAGDTQYF;TRA:CAAIKSGGSNYKLTF
clone_1004_seq_2	H11_clonotype615	1	TRB:CASSDAQNSGNTLYF;TRA:CAVSGYNQGKLIF
clone_1005_seq_2	H11_clonotype618	1	TRB:CASSSQGYAEQFF;TRA:CAVSQPNAYKVIF
clone_1006_seq_2	H11_clonotype619	1	TRB:CASSLGRGETLYF;TRA:CAVSSSNMGYKLTF
clone_1007_seq_2	H11_clonotype621	1	TRB:CAWSHQGANTGQLYF;TRA:CALLSGGSNAKLTF
clone_1008_seq_2	H11_clonotype622	1	TRB:CASRGLGGLNQDTQYF;TRB:CASSDDRSAETLYF;TRA:CALSESGTGSKLSF
clone_1009_seq_2	H11_clonotype623	1	TRB:CASSDAGPGNTLYF;TRA:CALTYQGGRALIF
clone_1010_seq_2	H11_clonotype624	1	TRB:CASGDLGGYAEQFF;TRA:CAVRDYNVGDNSKLIW
clone_1011_seq_2	H11_clonotype625	1	TRB:CASSWTRHTEVFF;TRA:CAASGGANTGKLTF
clone_1012_seq_2	H11_clonotype627	1	TRB:CASSQDRENTEVFF;TRA:CALSEWSNYNVLYF
clone_1013_seq_2	H11_clonotype628	1	TRB:CASSQVGGDAEQFF;TRA:CALGTGSFNKLTF
clone_1014_seq_2	H11_clonotype629	1	TRB:CAWSPGTGWNSPLYF;TRA:CAVSAPSSSFSKLVF
clone_1015_seq_2	H11_clonotype630	1	TRB:CAWEEGSVSNERLFF;TRA:CALSEGTASLGKLQF
clone_1016_seq_2	H11_clonotype631	1	TRB:CASRRQGNTEVFF;TRB:CASSPGQYEQYF;TRA:CALAHRGSALGRLHF
clone_1017_seq_2	H11_clonotype632	1	TRB:CASSPGTGRNSDYTF;TRB:CASSRDTQYF;TRA:CALVGPTSSGQKLVF
clone_1018_seq_2	H11_clonotype633	1	TRB:CASSQVGSAETLYF;TRA:CAMREGNNNNAPRF
clone_1019_seq_2	H11_clonotype634	1	TRB:CASSQRGFQDTQYF;TRA:CAMRDPSNTNKVVF
clone_1020_seq_2	H11_clonotype636	1	TRB:CAWSFLRDSYAEQFF;TRA:CAMRPSSGSWQLIF
clone_1021_seq_2	H11_clonotype637	1	TRB:CASDPGQNQAPLF;TRB:CASSLKQYEQYF;TRA:CALSDHVGDNSKLIW
clone_1022_seq_2	H11_clonotype638	1	TRB:CASRGQNTEVFF;TRA:CALGGNYNQGKLIF
clone_1023_seq_2	H11_clonotype639	1	TRB:CASSERDSQDTQYF;TRA:CALGDRNSNNRIFF
clone_1024_seq_2	H11_clonotype640	1	TRB:CASGDADGLYEQYF;TRA:CALSRTSGGNYKPTF
clone_1025_seq_2	H11_clonotype641	1	TRB:CASSPDRGRGTEVFF;TRA:CALAASSGSWQLIF
clone_1026_seq_2	H11_clonotype642	1	TRB:CASSDNWGNYAEQFF;TRA:CAMRETDTNAYKVIF
clone_1027_seq_2	H11_clonotype643	1	TRB:CASSRTGQDTQYF;TRA:CALGPDTNAYKVIF
clone_1028_seq_2	H11_clonotype644	1	TRB:CASSQGTGGTEVFF;TRA:CAMREPLSGSFNKLTF
clone_1029_seq_2	H11_clonotype645	1	TRB:CASSDGVEGNSDYTF;TRA:CAMREGASGYNKLTF
clone_1030_seq_2	H11_clonotype646	1	TRB:CASGDAGGSYEQYF;TRA:CAGGNNNNAPRF
clone_1031_seq_2	H11_clonotype647	1	TRB:CASSQEEGYEQYF;TRA:CAAINTGKLTF
clone_1032_seq_2	H11_clonotype648	1	TRB:CASSLDRGRAAQYF;TRA:CAAPGGNNKLTF;TRA:CAARVNNNNAPRF
clone_1033_seq_2	H11_clonotype649	1	TRB:CAWSGDWGNTGQLYF;TRA:CAANQGGSAKLIF
clone_1034_seq_2	H11_clonotype650	1	TRB:CASSVRRNTLYF;TRA:CAMREGRDSGGSNYKLTF
clone_1035_seq_2	H11_clonotype652	1	TRB:CASSPDQSEQYF;TRA:CAARKQGTGSKLSF
clone_1036_seq_2	H11_clonotype653	1	TRB:CASSLGDLEQYF;TRA:CAAFSSNTNKVVF
clone_1037_seq_2	H11_clonotype654	1	TRB:CASSFRPSGNTLYF;TRB:CASSPQGGQDTQYF;TRA:CAARGYNQGKLIF
clone_1038_seq_2	H11_clonotype655	1	TRB:CASSVGGSTGQLYF;TRA:CAASGNQGGRALIF
clone_1039_seq_2	H11_clonotype656	1	TRB:CASSDAGRGNQAPLF;TRA:CAAQRNSNNRIFF
clone_1040_seq_2	H11_clonotype658	1	TRB:CASSETGGREETLYF;TRA:CAASLSSGSWQLIF
clone_1041_seq_2	H11_clonotype661	1	TRA:CAASWGGRALIF
clone_1042_seq_2	H11_clonotype662	1	TRA:CAAYNYAQGLTF
clone_1043_seq_2	H11_clonotype663	1	TRA:CAVSSNYNQGKLIF
clone_1044_seq_2	H11_clonotype664	1	TRA:CAVRKTASLGKLQF
clone_1045_seq_2	H11_clonotype667	1	TRA:CAASITGNTGKLIF
clone_1046_seq_2	H11_clonotype668	1	TRA:CAASQNYNQGKLIF
clone_1047_seq_2	H11_clonotype669	1	TRB:CASSTSGQLYF
clone_1048_seq_2	H11_clonotype670	1	TRA:CALRAGGSNAKLTF
clone_1049_seq_2	H11_clonotype671	1	TRA:CALRAGGSNAKLTF
clone_1050_seq_2	H11_clonotype673	1	TRB:CASSQETGGGNTQYF
clone_1051_seq_2	H11_clonotype674	1	TRB:CASSQDPGGDYEQYF
clone_1052_seq_2	H11_clonotype675	1	TRB:CASSQDGTGGGEQYF
clone_1053_seq_2	H11_clonotype676	1	TRB:CASSPGLDSQNTLYF
clone_1054_seq_2	H11_clonotype678	1	TRB:CASSSGQKNTLYF
clone_1055_seq_2	H11_clonotype680	1	TRB:CASSRDRGGNTLYF
clone_1056_seq_2	H11_clonotype681	1	TRB:CASSRDAGGNTLYF
clone_1057_seq_2	H11_clonotype682	1	TRB:CASSSAVSGNTLYF
clone_1058_seq_2	H11_clonotype683	1	TRB:CASSTSTNSDYTF
clone_1059_seq_2	H11_clonotype684	1	TRB:CASSLLQGNTLYF
clone_1060_seq_2	H11_clonotype685	1	TRB:CASSLDFGYEQYF
clone_1061_seq_2	H11_clonotype686	1	TRB:CASSLEDGNTLYF
clone_1062_seq_2	H11_clonotype687	1	TRB:CASSQGPQDTQYF
clone_1063_seq_2	H11_clonotype688	1	TRB:CASSRRSQNTLYF
clone_1064_seq_2	H11_clonotype689	1	TRB:CASSLSTNTEVFF
clone_1065_seq_2	H11_clonotype690	1	TRB:CASRPSNTGQLYF
clone_1066_seq_2	H11_clonotype691	1	TRB:CASSPDNNERLFF
clone_1067_seq_2	H11_clonotype692	1	TRB:CASRRNSGNTLYF
clone_1068_seq_2	H11_clonotype694	1	TRB:CASSTGTKDTQYF
clone_1069_seq_2	H11_clonotype696	1	TRB:CASSTGTKDTQYF
clone_1070_seq_2	H11_clonotype698	1	TRB:CASSYWGDAEQFF
clone_1071_seq_2	H11_clonotype701	1	TRB:CASSWGSSYEQYF
clone_1072_seq_2	H11_clonotype703	1	TRB:CASRPGGGNTGQLYF
clone_1073_seq_2	H11_clonotype705	1	TRB:CASSPDRVNQDTQYF
clone_1074_seq_2	H11_clonotype707	1	TRB:CASSDMGLSNERLFF
clone_1075_seq_2	H11_clonotype708	1	TRB:CASSGTGGNYAEQFF
clone_1076_seq_2	H11_clonotype709	1	TRB:CASGDWGHSQNTLYF
clone_1077_seq_2	H11_clonotype710	1	TRB:CASSDSLGFNYAEQFF
clone_1078_seq_2	H11_clonotype711	1	TRB:CASRTGTGGVYAEQFF
clone_1079_seq_2	H11_clonotype712	1	TRB:CASSDLDWGSQNTLYF
clone_1080_seq_2	H11_clonotype713	1	TRB:CASSQGVGAETLYF
clone_1081_seq_2	H11_clonotype714	1	TRB:CASSRTVGNSDYTF
clone_1082_seq_2	H11_clonotype715	1	TRB:CASSKGLGGDTQYF
clone_1083_seq_2	H11_clonotype716	1	TRB:CASSYSGGYAEQFF
clone_1084_seq_2	H11_clonotype717	1	TRB:CASSSGTGRSDYTF
clone_1085_seq_2	H11_clonotype718	1	TRB:CASSLPGGNERLFF
clone_1086_seq_2	H11_clonotype719	1	TRB:CASSPGQYNSPLYF;TRA:CAVRIFF;TRA:CAVSVTASLGKLQF
clone_1087_seq_2	H11_clonotype720	1	TRB:CASSLGGRDTQYF;TRA:CAIVDYNVLYF
clone_1088_seq_2	H11_clonotype721	1	TRB:CASSLTGWDTEVFF;TRA:CILRGTGYQNFYF
clone_1089_seq_2	H11_clonotype722	1	TRB:CASSLGRPYEQYF;TRA:CAMSYGNEKITF
clone_1090_seq_2	H11_clonotype723	1	TRB:CASGAGGANTGQLYF;TRA:CAIKTGGYKVVF
clone_1091_seq_2	H11_clonotype724	1	TRB:CASGDKENNYAEQFF;TRA:CILRVQGYANKMIF
clone_1092_seq_2	H11_clonotype725	1	TRB:CTCSAGNSPLYF;TRA:CAAMDSNYQLIW
clone_1093_seq_2	H11_clonotype726	1	TRB:CASSQLGGSAETLYF;TRA:CALGARSNTNKVVF;TRA:CALVRNSNNRIFF
clone_1094_seq_2	H11_clonotype727	1	TRB:CASSQELGGEDTQYF;TRA:CAIDKSNYNVLYF
clone_1095_seq_2	H11_clonotype728	1	TRB:CASGDRGPGGAPREQYF;TRB:CASRTGDNQAPLF;TRA:CAAPSNMGYKLTF;TRA:CAEMLSGSFNKLTF
clone_1096_seq_2	H11_clonotype729	1	TRB:CASSLGRLYEQYF;TRA:CALITGNTGKLIF
clone_1097_seq_2	H11_clonotype730	1	TRB:CASSDRGRGYAEQFF;TRB:CASSLPGDNSDYTF;TRA:CAILSGGNYKPTF
clone_1098_seq_2	H11_clonotype731	1	TRB:CASSGGQGAGNTLYF;TRA:CALERTNTNKVVF
clone_1099_seq_2	H11_clonotype732	1	TRB:CASGDARAYNSPLYF;TRA:CAYYSNNRLTL
clone_1100_seq_2	H11_clonotype733	1	TRB:CASSQDTQQNTLYF;TRA:CAAFTGSGGKLTL
clone_1101_seq_2	H11_clonotype734	1	TRB:CASSQDRVNERLFF;TRA:CAAESSNTNKVVF;TRA:CAARATSSGQKLVF
clone_1102_seq_2	H11_clonotype735	1	TRB:CASSYRDWGDEQYF;TRA:CAVDAGYKLTF;TRA:CAVSMRTNSAGNKLTF
clone_1103_seq_2	H11_clonotype736	1	TRB:CASSYWGGEDTQYF;TRA:CARESGGNNKLTF
clone_1104_seq_2	H11_clonotype737	1	TRB:CASSQPGQVQDTQYF;TRA:CAAEYMSNYNVLYF
clone_1105_seq_2	H11_clonotype739	1	TRB:CASSPRGAYNSPLYF;TRA:CATDNMGYKLTF
clone_1106_seq_2	H11_clonotype740	1	TRB:CASSDAGGRYAEQFF;TRA:CAMEPNTGYQNFYF
clone_1107_seq_2	H11_clonotype741	1	TRB:CASSDGGGRYAEQFF;TRA:CAVMSNYNVLYF
clone_1108_seq_2	H11_clonotype742	1	TRB:CASSRDWGGGEQYF;TRA:CAIDQGTGNYKYVF
clone_1109_seq_2	H11_clonotype743	1	TRB:CASSLGLGENTLYF;TRA:CAFFTGANTGKLTF
clone_1110_seq_2	H11_clonotype744	1	TRB:CASRTGSSAETLYF;TRA:CAASTGSFNKLTF
clone_1111_seq_2	H11_clonotype745	1	TRB:CASSPGTGVDEQYF;TRB:CSSSQSTGGTTGQLYF;TRA:CVQDYSNNRLTL
clone_1112_seq_2	H11_clonotype746	1	TRB:CASSLVKKDTQYF;TRA:CALSENSNNRIFF;TRA:CAVRNTEGADRLTF
clone_1113_seq_2	H11_clonotype747	1	TRB:CASSLNNYAEQFF;TRA:CAAETGNTGKLIF
clone_1114_seq_2	H11_clonotype748	1	TRB:CASSFQQRETLYF;TRA:CAGDDSGYNKLTF
clone_1115_seq_2	H11_clonotype750	1	TRB:CASSQDRGGNTEVFF;TRA:CADGSSGNKLIF
clone_1116_seq_2	H11_clonotype751	1	TRB:CASSQEGQGEDTQYF;TRA:CAVRMNYNQGKLIF
clone_1117_seq_2	H11_clonotype752	1	TRB:CASSQAGKANTEVFF;TRA:CAGFHDTNAYKVIF
clone_1118_seq_2	H11_clonotype754	1	TRB:CASSLADSTEVFF;TRA:CAVSTGANTGKLTF
clone_1119_seq_2	H11_clonotype755	1	TRB:CASRPLQGANTEVFF;TRB:CASSRLGGYAEQFF;TRA:CALERFSGGSNAKLTF;TRA:CALSFFNTGNYKYVF
clone_1120_seq_2	H11_clonotype756	1	TRB:CASSPTGGNTLYF;TRA:CALSDPGNRIFF
clone_1121_seq_2	H11_clonotype757	1	TRB:CASSFGRNTEVFF;TRA:CALSLNNYAQGLTF
clone_1122_seq_2	H11_clonotype758	1	TRB:CASSEGTGGPDTQYF;TRA:CAPIITGSGGKLTL
clone_1123_seq_2	H11_clonotype759	1	TRB:CASGDADKSGNTLYF;TRA:CAVSPWAQGLTF;TRA:CAVSQNTGGLSGKLTF
clone_1124_seq_2	H11_clonotype760	1	TRB:CASSQRGGNTEVFF;TRA:CAASHNTNTGKLTF
clone_1125_seq_2	H11_clonotype762	1	TRB:CASSYRGNYAEQFF;TRA:CAASPGNYKYVF
clone_1126_seq_2	H11_clonotype763	1	TRB:CASSLGLGIDTQYF;TRA:CAASNSNNRLTL
clone_1127_seq_2	H11_clonotype765	1	TRB:CASSSPWGRQNTLYF;TRA:CALETNYGNEKITF
clone_1128_seq_2	H11_clonotype766	1	TRB:CASSQEQGVAETLYF;TRA:CAAGGTGSNRLTF
clone_1129_seq_2	H11_clonotype767	1	TRB:CASSQVGKNYAEQFF;TRA:CAASKSNYNVLYF
clone_1130_seq_2	H11_clonotype769	1	TRB:CASSLNKITEVFF;TRA:CVLGDSSGSWQLIF
clone_1131_seq_2	H11_clonotype770	1	TRB:CASSLEGSSDYTF;TRA:CALRGSNTNKVVF
clone_1132_seq_2	H11_clonotype771	1	TRB:CASSLGANTEVFF;TRA:CAASAGSGGKLTL
clone_1133_seq_2	H11_clonotype773	1	TRB:CASSLATNTEVFF;TRA:CAASLSGGSNAKLTF
clone_1134_seq_2	H11_clonotype774	1	TRB:CASSFRVGTEVFF;TRA:CAASARNNNAPRF
clone_1135_seq_2	H11_clonotype775	1	TRB:CASNTGGSERLFF;TRA:CAAPVGDNSKLIW
clone_1136_seq_2	H11_clonotype776	1	TRB:CASSYGHYAEQFF;TRA:CAVSDQGGSAKLIF
clone_1137_seq_2	H11_clonotype777	1	TRB:CASSQEEGRAEQFF;TRA:CAASPVTGSGGKLTL
clone_1138_seq_2	H11_clonotype778	1	TRB:CASSAGTGGDTQYF;TRA:CAARSSGSWQLIF
clone_1139_seq_2	H11_clonotype779	1	TRB:CASSVWGGDNTLYF;TRA:CAVSMGYNQGKLIF
clone_1140_seq_2	H11_clonotype782	1	TRB:CASSLNRGVTEVFF;TRA:CAVSASSGSWQLIF
clone_1141_seq_2	H11_clonotype783	1	TRB:CASSQELGGRAEQFF;TRA:CALGGNTGNYKYVF
clone_1142_seq_2	H11_clonotype784	1	TRB:CASSQEWTANTEVFF;TRA:CAARDDTNAYKVIF
clone_1143_seq_2	H11_clonotype786	1	TRB:CASSQDRGGLAEQFF;TRA:CALSDRSNNRIFF
clone_1144_seq_2	H11_clonotype787	1	TRB:CASSQGGASGNTLYF;TRA:CAVGGGSALGRLHF
clone_1145_seq_2	H11_clonotype788	1	TRB:CAWSPGLGGSQNTLYF;TRA:CAMRDWNNNAPRF
clone_1146_seq_2	H11_clonotype789	1	TRB:CASSPQGIGNTLYF;TRB:CASSSGHNQAPLF;TRA:CAVRPSSGSWQLIF
clone_1147_seq_2	H11_clonotype790	1	TRB:CASSLGQNSDYTF;TRA:CAARATSSGQKLVF
clone_1148_seq_2	H11_clonotype791	1	TRB:CASSLGSQNTLYF;TRA:CAVSAIYGSSGNKLIF
clone_1149_seq_2	H11_clonotype792	1	TRB:CASSLGAYAEQFF;TRA:CALVPNTGYQNFYF
clone_1150_seq_2	H11_clonotype793	1	TRB:CASSLDSQNTLYF;TRA:CAVSSASSGSWQLIF
clone_1151_seq_2	H11_clonotype794	1	TRB:CASSDAGGYNSPLYF;TRA:CAASKTGNTGKLIF
clone_1152_seq_2	H11_clonotype795	1	TRB:CASSGTGGNYAEQFF;TRB:CASSPTGGQDTQYF;TRA:CAVSPNNYAQGLTF
clone_1153_seq_2	H11_clonotype796	1	TRB:CASSDSRDWVSYEQYF;TRA:CALSPQGGRALIF
clone_1154_seq_2	H11_clonotype797	1	TRB:CASSYYGGADEQYF;TRA:CAVRSNTGYQNFYF
clone_1155_seq_2	H11_clonotype798	1	TRB:CASSLARARAEVFF;TRA:CAASVGVGDNSKLIW
clone_1156_seq_2	H11_clonotype799	1	TRB:CASSLGGQGYEQYF;TRA:CVVGDRGSALGRLHF
clone_1157_seq_2	H11_clonotype800	1	TRB:CASSQSRGRQNTLYF;TRA:CALSDRPGNTGKLIF
clone_1158_seq_2	H11_clonotype802	1	TRB:CASSQGWGGEDTQYF;TRA:CALSDWAGNYKYVF
clone_1159_seq_2	H11_clonotype803	1	TRB:CASSLGNQDTQYF;TRA:CALSESNMGYKLTF
clone_1160_seq_2	H11_clonotype804	1	TRB:CASSDRGLSGNTLYF;TRA:CALGATSGGNYKPTF
clone_1161_seq_2	H11_clonotype805	1	TRB:CASGDARTFPYEQYF;TRA:CVVGDRGSALGRLHF
clone_1162_seq_2	H11_clonotype806	1	TRB:CASSQDRENSDYTF;TRA:CALGEINTGNYKYVF
clone_1163_seq_2	H11_clonotype807	1	TRB:CASSQDSANTEVFF;TRA:CAVSTNTEGADRLTF
clone_1164_seq_2	H11_clonotype808	1	TRB:CASSQAGGAREQYF;TRA:CVLSEGNQGGSAKLIF
clone_1165_seq_2	H11_clonotype809	1	TRB:CSSSQDRQDTQYF;TRA:CALSDLNYNQGKLIF
clone_1166_seq_2	H11_clonotype810	1	TRB:CASSQEGANTGQLYF;TRA:CAMRVITGNTGKLIF
clone_1167_seq_2	H11_clonotype811	1	TRB:CASSQDGNSGNTLYF;TRA:CAASEVATGGNNKLTF
clone_1168_seq_2	H11_clonotype812	1	TRB:CASSSGTEYEQYF;TRA:CAMREGQYNQGKLIF
clone_1169_seq_2	H11_clonotype813	1	TRB:CASRWTGNTEVFF;TRA:CAMRDSSGSWQLIF
clone_1170_seq_2	H11_clonotype814	1	TRB:CASSPGGYAEQFF;TRA:CAMREGDTGNYKYVF
clone_1171_seq_2	H11_clonotype815	1	TRB:CASSEFNSYNSPLYF;TRA:CALSVGYGSSGNKLIF
clone_1172_seq_2	H11_clonotype816	1	TRB:CASSQVSNTGQLYF;TRA:CAMRETSNTNKVVF
clone_1173_seq_2	H11_clonotype817	1	TRB:CASSRRDWGYEQYF;TRA:CAASKNYGSSGNKLIF
clone_1174_seq_2	H11_clonotype818	1	TRB:CASSLNWVREQYF;TRA:CAMRVDSGGSNYKLTF
clone_1175_seq_2	H11_clonotype819	1	TRB:CASSQTDRGYEQYF;TRA:CALGDRGTGANTGKLTF
clone_1176_seq_2	H11_clonotype820	1	TRB:CASSSGTGSGNTLYF;TRA:CAMREGVSGSFNKLTF
clone_1177_seq_2	H11_clonotype821	1	TRB:CASSHGTAAEQFF;TRA:CAASSYGNEKITF
clone_1178_seq_2	H11_clonotype822	1	TRB:CASSRRQNTEVFF;TRA:CAARDYSNNRLTL
clone_1179_seq_2	H11_clonotype823	1	TRB:CASSDLGGSAETLYF;TRA:CAASDTNAYKVIF
clone_1180_seq_2	H11_clonotype824	1	TRB:CASSAGGGNTGQLYF;TRA:CAAPSSFSKLVF
clone_1181_seq_2	H11_clonotype826	1	TRB:CASSLGENTEVFF;TRA:CAASDQGGSAKLIF
clone_1182_seq_2	H11_clonotype829	1	TRB:CASSFGVLYEQYF;TRA:CALSDNNNAGAKLTF
clone_1183_seq_2	H11_clonotype830	1	TRA:CAGETGGNNKLTF
clone_1184_seq_2	H11_clonotype831	1	TRA:CAASEHSNMGYKLTF
clone_1185_seq_2	H11_clonotype832	1	TRB:CASRVQGQAPLF
clone_1186_seq_2	H11_clonotype833	1	TRB:CASSIYNSEVFF
clone_1187_seq_2	H11_clonotype834	1	TRA:CAVSGPNTGKLTF
clone_1188_seq_2	H11_clonotype835	1	TRA:CAVSGPNTGKLTF
clone_1189_seq_2	H11_clonotype836	1	TRA:CAARKGGSAKLIF
clone_1190_seq_2	H11_clonotype837	1	TRB:CASSSGTANTGQLYF
clone_1191_seq_2	H11_clonotype838	1	TRB:CASSFSGTGDTEVFF
clone_1192_seq_2	H11_clonotype839	1	TRB:CASSTTGGGNYAEQFF
clone_1193_seq_2	H11_clonotype840	1	TRB:CASSQEGTGLAETLYF
clone_1194_seq_2	H11_clonotype841	1	TRB:CASSQEGRTGGGEQYF
clone_1195_seq_2	H11_clonotype843	1	TRB:CASSQEGRTGGGEQYF
clone_1196_seq_2	H11_clonotype844	1	TRB:CASSQEGRTGGGEQYF
clone_1197_seq_2	H11_clonotype845	1	TRB:CASSQEGGNNYAEQFF
clone_1198_seq_2	H11_clonotype846	1	TRB:CASSQEGGNNYAEQFF
clone_1199_seq_2	H11_clonotype848	1	TRB:CASSQDRGFSNERLFF
clone_1200_seq_2	H11_clonotype850	1	TRB:CASSQGTGGYNSPLYF
clone_1201_seq_2	H11_clonotype851	1	TRB:CASSRLGGRSSYEQYF
clone_1202_seq_2	H11_clonotype852	1	TRB:CASSRWGLGGQDTQYF
clone_1203_seq_2	H11_clonotype853	1	TRB:CASSRWGLGGQDTQYF
clone_1204_seq_2	H11_clonotype854	1	TRA:CAVSAATGYQNFYF
clone_1205_seq_2	H11_clonotype855	1	TRA:CALGSSNTNKVVF
clone_1206_seq_2	H11_clonotype856	1	TRA:CALGRNSNNRIFF
clone_1207_seq_2	H11_clonotype857	1	TRB:CASSPNRNTGQLYF
clone_1208_seq_2	H11_clonotype858	1	TRB:CASSPNRNTGQLYF
clone_1209_seq_2	H11_clonotype859	1	TRB:CASSPNRNTGQLYF
clone_1210_seq_2	H11_clonotype860	1	TRB:CASSLESANSDYTF
clone_1211_seq_2	H11_clonotype861	1	TRB:CASSLGTGGYEQYF
clone_1212_seq_2	H11_clonotype862	1	TRB:CASSSQGAVNTQYF
clone_1213_seq_2	H11_clonotype863	1	TRB:CASSSTGRGDTQYF
clone_1214_seq_2	H11_clonotype864	1	TRB:CASSLDRGNSDYTF
clone_1215_seq_2	H11_clonotype865	1	TRB:CASSLDWSQNTLYF
clone_1216_seq_2	H11_clonotype866	1	TRB:CASSLARDIYEQYF
clone_1217_seq_2	H11_clonotype867	1	TRB:CASSLGGGEDTQYF
clone_1218_seq_2	H11_clonotype868	1	TRB:CASSLVGTENTLYF
clone_1219_seq_2	H11_clonotype869	1	TRB:CASSFDNNQDTQYF
clone_1220_seq_2	H11_clonotype871	1	TRB:CASSRGQGSGNTLYF
clone_1221_seq_2	H11_clonotype872	1	TRB:CASSRGQGSGNTLYF
clone_1222_seq_2	H11_clonotype873	1	TRB:CASSSRDRDTEVFF
clone_1223_seq_2	H11_clonotype874	1	TRB:CASSSGQGDERLFF
clone_1224_seq_2	H11_clonotype875	1	TRB:CASSLDHSGNTLYF
clone_1225_seq_2	H11_clonotype876	1	TRB:CASSLDRGQYEQYF
clone_1226_seq_2	H11_clonotype877	1	TRB:CASSLWTIQNTLYF
clone_1227_seq_2	H11_clonotype879	1	TRB:CASRTGVSAETLYF
clone_1228_seq_2	H11_clonotype881	1	TRB:CASSLGGAATEVFF
clone_1229_seq_2	H11_clonotype882	1	TRB:CASSLGGAATEVFF
clone_1230_seq_2	H11_clonotype883	1	TRB:CASSHRGLNTEVFF
clone_1231_seq_2	H11_clonotype884	1	TRB:CASSLWTGGDEQYF
clone_1232_seq_2	H11_clonotype887	1	TRB:CASRGLGGRGEQYF
clone_1233_seq_2	H11_clonotype888	1	TRB:CASSPGHLYAEQFF
clone_1234_seq_2	H11_clonotype889	1	TRB:CASGDGPGQANTEVFF
clone_1235_seq_2	H11_clonotype890	1	TRB:CASRPLQGANTEVFF
clone_1236_seq_2	H11_clonotype891	1	TRB:CASSQAGASAETLYF
clone_1237_seq_2	H11_clonotype892	1	TRB:CASSQAGASAETLYF
clone_1238_seq_2	H11_clonotype893	1	TRB:CASGRGGVVAETLYF
clone_1239_seq_2	H11_clonotype894	1	TRB:CSSSTGLGEDTQYF
clone_1240_seq_2	H11_clonotype895	1	TRB:CTCSADGGDEQYF
clone_1241_seq_2	H11_clonotype897	1	TRB:CASSFWDWGYEQYF;TRA:CASSNNRIFF
clone_1242_seq_2	H11_clonotype898	1	TRB:CASSFGGNTGQLYF;TRB:CASSQVTANQDTQYF;TRA:CAPASSGSWQLIF;TRA:CILQGTGSKLSF
clone_1243_seq_2	H11_clonotype900	1	TRB:CASSSGTGGWEQYF;TRA:CALSSNTNKVVF
clone_1244_seq_2	H11_clonotype901	1	TRB:CASSPDGSSYEQYF;TRA:CALELYAQGLTF
clone_1245_seq_2	H11_clonotype902	1	TRB:CASSQTGTGWNTLYF;TRA:CILRVNTGNYKYVF
clone_1246_seq_2	H11_clonotype903	1	TRB:CTCSAGGGSEVFF;TRA:CAATDTNAYKVIF;TRA:CADNTNTGKLTF
clone_1247_seq_2	H11_clonotype904	1	TRB:CASRTGQTEVFF;TRA:CAAEAGGGYKVVF
clone_1248_seq_2	H11_clonotype905	1	TRB:CASSQVWGGNYAEQFF;TRA:CATDANTNTGKLTF
clone_1249_seq_2	H11_clonotype906	1	TRB:CASSPGTGGYEQYF;TRA:CVLSYNRIFF
clone_1250_seq_2	H11_clonotype907	1	TRB:CASSYGTGRETLYF;TRA:CAASTGNTGKLIF
clone_1251_seq_2	H11_clonotype908	1	TRB:CASSSRGENTEVFF;TRA:CAIDPASSSFSKLVF;TRA:CTGRVEGADRLTF
clone_1252_seq_2	H11_clonotype909	1	TRB:CASSGDWGGYEQYF;TRA:CAIDRTGGYKVVF
clone_1253_seq_2	H11_clonotype911	1	TRB:CASSFEGGRNTLYF;TRA:CAVANTNKVVF;TRA:CAVSLMNYNQGKLIF
clone_1254_seq_2	H11_clonotype912	1	TRB:CASSFGTGTERLFF;TRA:CILRVTNTGYQNFYF
clone_1255_seq_2	H11_clonotype914	1	TRB:CASGQGTGQLYF;TRB:CASSPDWVNQDTQYF;TRA:CAASPNYGNEKITF;TRA:CALGSSGSWQLIF
clone_1256_seq_2	H11_clonotype915	1	TRB:CTCSAPTAETLYF;TRA:CAPRNNYAQGLTF
clone_1257_seq_2	H11_clonotype916	1	TRB:CASSHRTGGNYAEQFF;TRA:CASMNYNQGKLIF;TRA:CATDNYAQGLTF
clone_1258_seq_2	H11_clonotype917	1	TRB:CASSPRADTGQLYF;TRA:CALERGNAGAKLTF
clone_1259_seq_2	H11_clonotype918	1	TRB:CASSLAGTNERLFF;TRA:CATPLTGGNNKLTF
clone_1260_seq_2	H11_clonotype919	1	TRB:CASSLAGSAETLYF;TRA:CAMGSNTNKVVF
clone_1261_seq_2	H11_clonotype920	1	TRB:CASSLTGGSYEQYF;TRA:CAASSGSWQLIF
clone_1262_seq_2	H11_clonotype921	1	TRB:CASSLWGSGTEVFF;TRB:CASSPPWGGNYAEQFF;TRA:CAADPLDYANKMIF;TRA:CAVRLSGGSNAKLTF
clone_1263_seq_2	H11_clonotype922	1	TRB:CASSPGHLYAEQFF;TRA:CVLVGDNSKLIW
clone_1264_seq_2	H11_clonotype923	1	TRB:CASSRTGNSAETLYF;TRB:CASSTGTGGGQNTLYF;TRA:CAAELMSNYNVLYF;TRA:CAVSSDRGSALGRLHF
clone_1265_seq_2	H11_clonotype924	1	TRB:CASSVDWGGSSYEQYF;TRA:CAIDHDTGNYKYVF
clone_1266_seq_2	H11_clonotype926	1	TRB:CASSQTGVSAETLYF;TRA:CAAEPMSNYNVLYF
clone_1267_seq_2	H11_clonotype927	1	TRB:CASSYWGERQNTLYF;TRA:CAAEGGFASALTF;TRA:CAGSTGGNNKLTF
clone_1268_seq_2	H11_clonotype928	1	TRB:CTCSGWDQNTLYF;TRA:CAFTGSGGKLTL
clone_1269_seq_2	H11_clonotype929	1	TRB:CASSRTGGGYEQYF;TRA:CALGRGAGSGGKLTL;TRA:CALWEPNTGYQNFYF
clone_1270_seq_2	H11_clonotype930	1	TRB:CASSLTISNERLFF;TRA:CAARGSALGRLHF
clone_1271_seq_2	H11_clonotype931	1	TRB:CASSLLGGAETLYF;TRA:CAVSAYGNEKITF
clone_1272_seq_2	H11_clonotype932	1	TRB:CASSLGLGENTLYF;TRA:CAVMNYNQGKLIF
clone_1273_seq_2	H11_clonotype933	1	TRB:CASSLVWGGAEQYF;TRA:CATLNTGYQNFYF
clone_1274_seq_2	H11_clonotype934	1	TRB:CASSFGTGNQAPLF;TRA:CAASGTNTGKLTF
clone_1275_seq_2	H11_clonotype935	1	TRB:CASSRGRAPNERLFF;TRA:CATETSSGQKLVF
clone_1276_seq_2	H11_clonotype936	1	TRB:CASSRVAGGQDTQYF;TRA:CAVSMRSNNRIFF
clone_1277_seq_2	H11_clonotype937	1	TRB:CATGGGDRGWEQYF;TRA:CALWEPNYAQGLTF;TRA:CVLSGGGRALIF
clone_1278_seq_2	H11_clonotype938	1	TRB:CASSRTGGANTGQLYF;TRB:CASSSLGTPDTQYF;TRA:CAVRDYAQGLTF;TRA:CAVSMESNYQLIW
clone_1279_seq_2	H11_clonotype939	1	TRB:CASSLQDSGNTLYF;TRA:CAADMATGGNNKLTF;TRA:CVVGANQGGSAKLIF
clone_1280_seq_2	H11_clonotype940	1	TRB:CASSRDRGGSDYTF;TRA:CATDAGSNNRIFF
clone_1281_seq_2	H11_clonotype942	1	TRB:CASSGGLGGGSAETLYF;TRA:CAARGYNQGKLIF;TRA:CALGGQLSGSFNKLTF
clone_1282_seq_2	H11_clonotype943	1	TRB:CASSQEGPNYAEQFF;TRA:CALTGYKLTF
clone_1283_seq_2	H11_clonotype945	1	TRB:CASSQTGRANTEVFF;TRA:CAVSAANKMIF
clone_1284_seq_2	H11_clonotype946	1	TRB:CASSSMGYEQYF;TRA:CAVSTSSGSWQLIF
clone_1285_seq_2	H11_clonotype947	1	TRB:CASSLGGHGQDTQYF;TRA:CALGESNNRIFF
clone_1286_seq_2	H11_clonotype948	1	TRB:CASSQDFWASAETLYF;TRA:CAVRYNTNTGKLTF
clone_1287_seq_2	H11_clonotype950	1	TRB:CASSLFLGGYAEQFF;TRB:CASSNRGRDTEVFF;TRA:CAMRGNTGYQNFYF;TRA:CAVSASYNQGKLIF
clone_1288_seq_2	H11_clonotype951	1	TRB:CASSPGDSGNTLYF;TRA:CADTNAYKVIF
clone_1289_seq_2	H11_clonotype953	1	TRB:CASSLHKNNQAPLF;TRA:CAVSAEGSNAKLTF
clone_1290_seq_2	H11_clonotype954	1	TRB:CASSSDRENTEVFF;TRA:CAARHYANKMIF
clone_1291_seq_2	H11_clonotype955	1	TRB:CASSFYRGAETLYF;TRA:CALSDHDANKMIF;TRA:CAVSMNSNNRIFF
clone_1292_seq_2	H11_clonotype956	1	TRB:CASSGTSSAETLYF;TRA:CAASEHSNMGYKLTF;TRA:CAMGYNTNTGKLTF
clone_1293_seq_2	H11_clonotype958	1	TRB:CTCSGRSGYEQYF;TRA:CALSLTGNTGKLIF
clone_1294_seq_2	H11_clonotype959	1	TRB:CTCGGQGPERLFF;TRA:CAVRPNTGYQNFYF
clone_1295_seq_2	H11_clonotype961	1	TRB:CASSQEGRTGRAEQFF;TRA:CAASLNNNNAPRF
clone_1296_seq_2	H11_clonotype963	1	TRB:CASTPGLIQDTQYF;TRA:CAATNSAGNKLTF
clone_1297_seq_2	H11_clonotype964	1	TRB:CASRPGVSNERLFF;TRA:CAVSSTGGNNKLTF
clone_1298_seq_2	H11_clonotype966	1	TRB:CASSPAGLGYEQYF;TRA:CAVSAGGNNRLTL
clone_1299_seq_2	H11_clonotype968	1	TRB:CASSSPGTAYEQYF;TRA:CAVSASSNNRIFF
clone_1300_seq_2	H11_clonotype970	1	TRB:CASSPGTGGDTQYF;TRA:CALSGSNTNKVVF
clone_1301_seq_2	H11_clonotype971	1	TRB:CASSFWGGSYEQYF;TRA:CALSRSNNRIFF
clone_1302_seq_2	H11_clonotype972	1	TRB:CASNRDWGYEQYF;TRB:CASRPTGLNTEVFF;TRA:CSASRTNTGKLTF
clone_1303_seq_2	H11_clonotype974	1	TRB:CASSGGLGANTGQLYF;TRA:CALSSNNNAPRF
clone_1304_seq_2	H11_clonotype975	1	TRB:CASSQEGQGGATQYF;TRA:CALGYNAGAKLTF
clone_1305_seq_2	H11_clonotype976	1	TRB:CASSMGAETLYF;TRA:CVLRIASSSFSKLVF
clone_1306_seq_2	H11_clonotype977	1	TRB:CASSHGGGSNTGQLYF;TRB:CASSPRDRGRDTQYF;TRA:CAASSGGSNYKLTF;TRA:CALEGKSNAGAKLTF
clone_1307_seq_2	H11_clonotype979	1	TRB:CASSFDREGSDYTF;TRA:CVLSHYGSSGNKLIF
clone_1308_seq_2	H11_clonotype980	1	TRB:CASSEEGNQDTQYF;TRA:CAVSMGTTASLGKLQF
clone_1309_seq_2	H11_clonotype981	1	TRB:CASSLGGQGGEVFF;TRA:CAASGSSGSWQLIF
clone_1310_seq_2	H11_clonotype982	1	TRB:CASSLSKGVTEVFF;TRA:CAVSHNTNTGKLTF
clone_1311_seq_2	H11_clonotype983	1	TRB:CASSLLLGQNTLYF;TRA:CAMVLNSGGSNAKLTF;TRA:CAVSAGGSNAKLTF
clone_1312_seq_2	H11_clonotype984	1	TRB:CASSLWDRGHEQYF;TRA:CALVDRSNNRIFF
clone_1313_seq_2	H11_clonotype985	1	TRB:CASRLGGNTGQLYF;TRA:CALEGHVGDNSKLIW
clone_1314_seq_2	H11_clonotype986	1	TRB:CASSLLGGAREQYF;TRA:CALRSPLTGSGGKLTL
clone_1315_seq_2	H11_clonotype987	1	TRB:CASSFGTANERLFF;TRA:CALKTQVVGQLTF
clone_1316_seq_2	H11_clonotype988	1	TRB:CASSQEGRTDNQAPLF;TRB:CTCSANYNSPLYF;TRA:CALRRGSSGNKLIF;TRA:CAMRDTNNNAPRF
clone_1317_seq_2	H11_clonotype989	1	TRB:CASSFWVSGNTLYF;TRB:CASSQEGGGNAETLYF;TRA:CAVSEGSSGSWQLIF
clone_1318_seq_2	H11_clonotype990	1	TRB:CASSLDWANQDTQYF;TRB:CASSQAQGARQNTLYF;TRA:CALSASSGSWQLIF
clone_1319_seq_2	H11_clonotype994	1	TRB:CASSWGGLGAEQFF;TRA:CAVSLNYGSSGNKLIF
clone_1320_seq_2	H11_clonotype995	1	TRB:CASSPDWGGGSAETLYF;TRA:CVVGDRGSALGRLHF
clone_1321_seq_2	H11_clonotype996	1	TRB:CASSQDGQGGIDYTF;TRA:CAVSELNTGANTGKLTF
clone_1322_seq_2	H11_clonotype997	1	TRB:CASSQDWGNYAEQFF;TRA:CALGNSNTGYQNFYF
clone_1323_seq_2	H11_clonotype998	1	TRB:CASSPGLGGVETLYF;TRA:CAVSRNTGGLSGKLTF
clone_1324_seq_2	H11_clonotype999	1	TRB:CTCSPRGNTEVFF;TRA:CALNTGANTGKLTF

## Sheet: PD1KO1
Tcell_clone_rank	clonotype_id	count	cdr3s_aa
clone_1_seq_2	H11_PD1_KO_clonotype1	390	TRB:CASSLTGGSEQYF;TRA:CAVSPDTNAYKVIF
clone_2_seq_2	H11_PD1_KO_clonotype2	148	TRB:CASSSGLGGRGQFF;TRA:CAVRYTNTGKLTF
clone_3_seq_2	H11_PD1_KO_clonotype3	132	TRB:CASGDWGDAEQFF;TRA:CAVPRNSNNRIFF
clone_4_seq_2	H11_PD1_KO_clonotype4	107	TRB:CASSSGQGAGNTLYF;TRA:CAVSMLSTNAYKVIF;TRA:CVLGDLTGNTGKLIF
clone_5_seq_2	H11_PD1_KO_clonotype5	66	TRB:CASSETGGNSGNTLYF;TRA:CAMSNTNTGKLTF;TRA:CAVRTNSGTYQRF
clone_6_seq_2	H11_PD1_KO_clonotype6	52	TRB:CASSLTGKDTQYF;TRA:CAVRTSGGNYKPTF
clone_7_seq_2	H11_PD1_KO_clonotype7	47	TRB:CASSLGGAVAETLYF;TRA:CAAEALSNYNVLYF;TRA:CAVSGSGTYQRF
clone_8_seq_2	H11_PD1_KO_clonotype8	42	TRB:CASGEQGRSAETLYF;TRA:CAAEAWANYNVLYF;TRA:CAVSSAYKVIF
clone_9_seq_2	H11_PD1_KO_clonotype10	36	TRB:CASSLGQGALAPLF;TRA:CVLSARTSGGNYKPTF
clone_10_seq_2	H11_PD1_KO_clonotype11	35	TRB:CASSRQGSSAETLYF;TRA:CAAEAWSGYNKLTF
clone_11_seq_2	H11_PD1_KO_clonotype9	35	TRB:CASSLLGGRQNTLYF;TRA:CAVSSLPGTGSNRLTF
clone_12_seq_2	H11_PD1_KO_clonotype12	32	TRB:CASSQDGRTGDERLFF;TRA:CAAVRNNNNAPRF
clone_13_seq_2	H11_PD1_KO_clonotype13	31	TRB:CASSPPWGGYEQYF;TRA:CALVPNTNKVVF
clone_14_seq_2	H11_PD1_KO_clonotype14	31	TRB:CASSQEGRTGSYEQYF;TRA:CAASANNNNAPRF
clone_15_seq_2	H11_PD1_KO_clonotype15	31	TRB:CASSLGRRSQNTLYF;TRA:CAVRVTGSGGKLTL
clone_16_seq_2	H11_PD1_KO_clonotype16	30	TRB:CASSLWGNNQAPLF;TRA:CALSDRGSSGNKLIF
clone_17_seq_2	H11_PD1_KO_clonotype17	26	TRB:CASSDGGAETLYF;TRA:CALGVYGSSGNKLIF
clone_18_seq_2	H11_PD1_KO_clonotype22	25	TRB:CASSLGRRSQNTLYF
clone_19_seq_2	H11_PD1_KO_clonotype23	25	TRB:CTCSAEVAQNTLYF;TRA:CAASAGNSNNRIFF;TRA:CALSLSNYNVLYF
clone_20_seq_2	H11_PD1_KO_clonotype18	24	TRB:CASSQEGRTGGPGQLYF;TRA:CALPPNNNNAPRF
clone_21_seq_2	H11_PD1_KO_clonotype19	24	TRB:CTCSSGGSYAEQFF;TRA:CALITGGSNAKLTF
clone_22_seq_2	H11_PD1_KO_clonotype21	24	TRB:CASSQETGGISYEQYF;TRA:CAASMPNYNVLYF;TRA:CAVSADGSSGNKLIF
clone_23_seq_2	H11_PD1_KO_clonotype20	23	TRB:CASSQGLGGREQYF;TRA:CALSPNSGGSNAKLTF
clone_24_seq_2	H11_PD1_KO_clonotype24	22	TRB:CASSQEGANTEVFF;TRA:CALERGYGNEKITF
clone_25_seq_2	H11_PD1_KO_clonotype26	20	TRB:CASSPLGNSQNTLYF;TRA:CAVSMGNYNQGKLIF
clone_26_seq_2	H11_PD1_KO_clonotype27	19	TRB:CARGQESNERLFF;TRB:CGAGTGGYEQYF;TRA:CAMREGEGGSAKLIF
clone_27_seq_2	H11_PD1_KO_clonotype29	19	TRB:CASSEWVNTGQLYF;TRA:CAVSGETSSFSKLVF
clone_28_seq_2	H11_PD1_KO_clonotype31	19	TRB:CTCSHRGGNQAPLF;TRA:CAGASSGSWQLIF
clone_29_seq_2	H11_PD1_KO_clonotype30	18	TRB:CASSDGRGQNTLYF;TRA:CALGEGTGSNRLTF;TRA:CAMRGGYNQGKLIF;TRA:CAMRGGYNQGKLIF
clone_30_seq_2	H11_PD1_KO_clonotype25	17	TRB:CASSLDRGEVFF;TRA:CAIDHNTGKLTF
clone_31_seq_2	H11_PD1_KO_clonotype28	17	TRB:CASSQDPGAGQLYF;TRA:CAIYVTGSGGKLTL;TRA:CILRVVGANTGKLTF
clone_32_seq_2	H11_PD1_KO_clonotype33	17	TRA:CAVSPDTNAYKVIF
clone_33_seq_2	H11_PD1_KO_clonotype34	15	TRB:CASSGHNQDTQYF;TRA:CAVTRESNYNVLYF
clone_34_seq_2	H11_PD1_KO_clonotype36	14	TRB:CASSYGGTSAETLYF;TRA:CAAEYMSNYNVLYF;TRA:CAVSMTNSAGNKLTF
clone_35_seq_2	H11_PD1_KO_clonotype32	13	TRB:CASSLEQNTEVFF;TRA:CAAGTGYQNFYF
clone_36_seq_2	H11_PD1_KO_clonotype35	13	TRB:CASSLEGGLFEQYF
clone_37_seq_2	H11_PD1_KO_clonotype37	13	TRB:CTCSAEGQGKNTLYF;TRA:CALWELPMSNYNVLYF;TRA:CAPLPTSSGQKLVF
clone_38_seq_2	H11_PD1_KO_clonotype39	13	TRB:CASSLEYEQYF;TRA:CAASAGGNNKLTF
clone_39_seq_2	H11_PD1_KO_clonotype41	12	TRB:CASSHRDRGYEQYF;TRA:CAMESQGGRALIF
clone_40_seq_2	H11_PD1_KO_clonotype38	11	TRB:CASSQGTGIGNTLYF;TRA:CALRGTGGYKVVF
clone_41_seq_2	H11_PD1_KO_clonotype42	11	TRB:CASSSLGVYAEQFF;TRA:CAVSDNYAQGLTF
clone_42_seq_2	H11_PD1_KO_clonotype44	11	TRB:CASSDPPRGYNNQAPLF;TRB:CTCSAEVAQNTLYF;TRA:CALGDSNYQLIW
clone_43_seq_2	H11_PD1_KO_clonotype47	11	TRB:CASSLEDANTEVFF;TRB:CASSLTGGTQNTLYF;TRA:CAVSNMGYKLTF
clone_44_seq_2	H11_PD1_KO_clonotype40	10	TRB:CASSLGTEDTLYF;TRA:CAAEASGSWQLIF;TRA:CALGVNYNQGKLIF
clone_45_seq_2	H11_PD1_KO_clonotype43	10	TRB:CASSMGERLFF;TRA:CAASDYQGGRALIF;TRA:CALSDAQGGRALIF
clone_46_seq_2	H11_PD1_KO_clonotype45	10	TRB:CASGGTGGNYAEQFF;TRA:CAVRQMATGGNNKLTF
clone_47_seq_2	H11_PD1_KO_clonotype49	10	TRB:CASRQPGQGYAEQFF;TRA:CAMREGLGSNYQLIW
clone_48_seq_2	H11_PD1_KO_clonotype50	10	TRB:CASSETGGNSGNTLYF
clone_49_seq_2	H11_PD1_KO_clonotype51	10	TRB:CASSQDWGGQDTQYF;TRA:CAASEGGGSGGKLTL
clone_50_seq_2	H11_PD1_KO_clonotype53	9	TRB:CASSRTGTSQNTLYF;TRA:CAVSDLPGTGSNRLTF
clone_51_seq_2	H11_PD1_KO_clonotype56	9	TRB:CASGDARGGEQYF;TRA:CALSGTNSAGNKLTF
clone_52_seq_2	H11_PD1_KO_clonotype48	8	TRB:CASSLGGTEVFF;TRA:CAVRDTGYQNFYF
clone_53_seq_2	H11_PD1_KO_clonotype54	8	TRB:CASSLRLGGRGYAEQFF
clone_54_seq_2	H11_PD1_KO_clonotype60	8	TRB:CASSQEDWGGSYEQYF;TRA:CAVSADSNNRIFF
clone_55_seq_2	H11_PD1_KO_clonotype61	8	TRB:CASSFVGRSQNTLYF;TRA:CAGDMGYKLTF
clone_56_seq_2	H11_PD1_KO_clonotype46	7	TRB:CASSLRLGGRGYAEQFF;TRA:CAAADYSNNRLTL
clone_57_seq_2	H11_PD1_KO_clonotype55	7	TRB:CASSLGAGQDTQYF;TRA:CATDTNAYKVIF
clone_58_seq_2	H11_PD1_KO_clonotype57	7	TRB:CASSDGGNTGQLYF;TRA:CAASLYSNNRLTL
clone_59_seq_2	H11_PD1_KO_clonotype58	7	TRB:CASSLVLAETLYF;TRA:CAAYNTNTGKLTF
clone_60_seq_2	H11_PD1_KO_clonotype59	7	TRB:CASSQGGASAETLYF;TRA:CAAELMSNYNVLYF
clone_61_seq_2	H11_PD1_KO_clonotype62	7	TRB:CTCSAGRGHTEVFF;TRA:CARNTGANTGKLTF
clone_62_seq_2	H11_PD1_KO_clonotype65	7	TRB:CASSPLGGAEVFF;TRA:CARYNNNAPRF;TRA:CAVRNNAGAKLTF
clone_63_seq_2	H11_PD1_KO_clonotype66	7	TRB:CASSADRGRERLFF
clone_64_seq_2	H11_PD1_KO_clonotype67	7	TRB:CASSLDSPDTLYF;TRA:CAAHTNAYKVIF;TRA:CALGDRDYSNNRLTL
clone_65_seq_2	H11_PD1_KO_clonotype68	7	TRB:CASSLETNSDYTF;TRA:CAAIRNSNNRIFF
clone_66_seq_2	H11_PD1_KO_clonotype71	7	TRB:CASSLTGRSAETLYF;TRA:CAAEAMSNYNVLYF;TRA:CAVVQTGFASALTF
clone_67_seq_2	H11_PD1_KO_clonotype75	7	TRB:CASRPRLGEDTQYF;TRA:CAAPDTNAYKVIF
clone_68_seq_2	H11_PD1_KO_clonotype63	6	TRB:CASSDAAETLYF;TRA:CAVGNQGGSAKLIF
clone_69_seq_2	H11_PD1_KO_clonotype69	6	TRB:CASSDGGAYEQYF;TRB:CASSPGGREQYF;TRA:CAASEHAGDNSKLIW;TRA:CALWGNNNNAPRF
clone_70_seq_2	H11_PD1_KO_clonotype70	6	TRB:CASSQEGRTGSYEQYF
clone_71_seq_2	H11_PD1_KO_clonotype72	6	TRB:CASSQEGWGNTGQLYF;TRA:CAASEGGGGSAKLIF
clone_72_seq_2	H11_PD1_KO_clonotype73	6	TRB:CASSLEGGLFEQYF;TRA:CAMREGQGSNNRLTL
clone_73_seq_2	H11_PD1_KO_clonotype74	6	TRB:CASSLGRYEQYF;TRB:CAWSLRGSQNTLYF;TRA:CAASAMDYANKMIF
clone_74_seq_2	H11_PD1_KO_clonotype76	6	TRB:CASGDAQSNTEVFF;TRB:CASSEQNTEVFF;TRB:CASSLEQGGHTLYF;TRA:CALGNSGTYQRF
clone_75_seq_2	H11_PD1_KO_clonotype77	6	TRB:CASGDAGGRSAETLYF;TRA:CAARGSGGSNAKLTF;TRA:CAVEASSSFSKLVF
clone_76_seq_2	H11_PD1_KO_clonotype78	6	TRB:CASSLDRGEVFF
clone_77_seq_2	H11_PD1_KO_clonotype81	6	TRB:CASSLDSREQYF;TRB:CASSYTGGQNTLYF;TRA:CAVSAKNANKMIF
clone_78_seq_2	H11_PD1_KO_clonotype82	6	TRB:CASSIRAETLYF;TRA:CARMDYANKMIF
clone_79_seq_2	H11_PD1_KO_clonotype85	6	TRB:CASSADRGRERLFF;TRB:CASSLWTGLSNERLFF;TRB:CASSSPGTGKDTQYF;TRA:CALSAVDTNAYKVIF
clone_80_seq_2	H11_PD1_KO_clonotype86	6	TRB:CASSLGGGNTGQLYF;TRB:CASSPRDWGTDTQYF;TRA:CAVSAGGGLSGKLTF
clone_81_seq_2	H11_PD1_KO_clonotype101	5	TRB:CASSWTGQDTQYF;TRA:CAMREMQQGTGSKLSF
clone_82_seq_2	H11_PD1_KO_clonotype102	5	TRB:CASSWDNANSDYTF;TRA:CALELESNYQLIW
clone_83_seq_2	H11_PD1_KO_clonotype52	5	TRB:CTCSSGGSYAEQFF
clone_84_seq_2	H11_PD1_KO_clonotype79	5	TRB:CASSDAGGTGQLYF;TRB:CASSDRFSNERLFF;TRB:CASSQAPISQNTLYF;TRA:CAVRATGYQNFYF
clone_85_seq_2	H11_PD1_KO_clonotype80	5	TRB:CASTSGLGGYEQYF;TRA:CAASNTGYQNFYF
clone_86_seq_2	H11_PD1_KO_clonotype83	5	TRB:CASSLEGRNTEVFF;TRA:CAVRSSSFSKLVF
clone_87_seq_2	H11_PD1_KO_clonotype84	5	TRB:CASSPSWGGYEQYF;TRA:CALEMGNNRIFF
clone_88_seq_2	H11_PD1_KO_clonotype87	5	TRB:CASSDGDTQYF;TRA:CAFDNNNAPRF;TRA:CALITGGSNAKLTF
clone_89_seq_2	H11_PD1_KO_clonotype88	5	TRB:CASSLEGAANTEVFF;TRB:CGARVGQSQNTLYF;TRA:CALSGGSNYNVLYF;TRA:CAPNSAGNKLTF
clone_90_seq_2	H11_PD1_KO_clonotype89	5	TRB:CASSGGAHAEQFF;TRB:CASSYYWGGDAEQFF;TRA:CAAAYQGGRALIF;TRA:CVVGPYGSSGNKLIF
clone_91_seq_2	H11_PD1_KO_clonotype90	5	TRB:CASSLVGGRTGQLYF;TRB:CASSPRDWGEEQYF;TRA:CAATSSGQKLVF
clone_92_seq_2	H11_PD1_KO_clonotype91	5	TRB:CGARDHGAPNERLFF;TRA:CAVSAWATGGNNKLTF
clone_93_seq_2	H11_PD1_KO_clonotype92	5	TRB:CAWSLQRDRGTERLFF;TRA:CAATGYQNFYF;TRA:CALRDTGNYKYVF;TRA:CAVRNNAGAKLTF
clone_94_seq_2	H11_PD1_KO_clonotype93	5	TRB:CASSSGTKDTQYF;TRA:CALGRNSNNRIFF;TRA:CAVRPGTGSNRLTF
clone_95_seq_2	H11_PD1_KO_clonotype94	5	TRB:CASSLGTGNDERLFF;TRA:CAVITTASLGKLQF
clone_96_seq_2	H11_PD1_KO_clonotype96	5	TRB:CASGAGQGPNERLFF;TRB:CASSLDWGNTGQLYF;TRB:CASSLGTGGSETLYF;TRA:CVLSDSNYQLIW
clone_97_seq_2	H11_PD1_KO_clonotype97	5	TRB:CASSSLRRSGNTLYF;TRB:CTCSTRTGGFAEQFF;TRA:CALSGATGGNNKLTF
clone_98_seq_2	H11_PD1_KO_clonotype98	5	TRB:CASSLRLGGRGYAEQFF;TRA:CAVSPDTNAYKVIF
clone_99_seq_2	H11_PD1_KO_clonotype99	5	TRB:CASGGTDQAPLF;TRA:CAARNSAGNKLTF
clone_100_seq_2	H11_PD1_KO_clonotype100	4	TRB:CASSWTGQDTQYF
clone_101_seq_2	H11_PD1_KO_clonotype103	4	TRB:CASREGNTLYF;TRA:CALGPSSGSWQLIF;TRA:CAVSDITGNTGKLIF
clone_102_seq_2	H11_PD1_KO_clonotype104	4	TRB:CGARDWINQDTQYF;TRA:CAASMWGGSALGRLHF
clone_103_seq_2	H11_PD1_KO_clonotype105	4	TRB:CASSLEGAANTEVFF;TRB:CGARVGQSQNTLYF;TRA:CALSGGSNYNVLYF
clone_104_seq_2	H11_PD1_KO_clonotype106	4	TRB:CASSTGDTQYF;TRA:CAASASSGSWQLIF
clone_105_seq_2	H11_PD1_KO_clonotype107	4	TRB:CASSPNNYAEQFF;TRA:CAMREANSNNRIFF
clone_106_seq_2	H11_PD1_KO_clonotype108	4	TRB:CASSRDINNQAPLF;TRA:CAAVYGSSGNKLIF
clone_107_seq_2	H11_PD1_KO_clonotype109	4	TRB:CAWSLGPSSAETLYF;TRB:CTCSAGRGHTEVFF;TRA:CAAEAPPGGNYKPTF
clone_108_seq_2	H11_PD1_KO_clonotype110	4	TRB:CASSASGHHNSPLYF;TRA:CAVSGAGNTGKLIF
clone_109_seq_2	H11_PD1_KO_clonotype111	4	TRB:CASRQPGQGYAEQFF;TRA:CAMREGLGSNYQLIW
clone_110_seq_2	H11_PD1_KO_clonotype112	4	TRB:CASSQEGGAGEQYF;TRA:CAMREGDYNQGKLIF
clone_111_seq_2	H11_PD1_KO_clonotype113	4	TRB:CASSLRTGGYEQYF;TRB:CATRQNSYNSPLYF;TRA:CATSASSGSWQLIF
clone_112_seq_2	H11_PD1_KO_clonotype115	4	TRB:CASSQEGRTANTEVFF;TRA:CAAIKNNNNAPRF
clone_113_seq_2	H11_PD1_KO_clonotype117	4	TRB:CASSQEGREDAETLYF;TRB:CAWSQTGGADTQYF;TRA:CAASASSSFSKLVF;TRA:CANYSGGSNAKLTF
clone_114_seq_2	H11_PD1_KO_clonotype118	4	TRB:CASSDRDWASAETLYF;TRB:CASSSGQYEQYF;TRB:CAWSTSSGNTLYF;TRA:CAVRNYNQGKLIF
clone_115_seq_2	H11_PD1_KO_clonotype119	4	TRB:CTCSAAFSGNTLYF;TRA:CAGLNYGSSGNKLIF
clone_116_seq_2	H11_PD1_KO_clonotype120	4	TRB:CASSWDSSNTGQLYF;TRB:CAWTGESDYTF;TRA:CAVSARTNKVVF
clone_117_seq_2	H11_PD1_KO_clonotype121	4	TRB:CASSQEGGAGEQYF;TRB:CTCSAGGRTGQLYF;TRA:CALTPGGSNAKLTF
clone_118_seq_2	H11_PD1_KO_clonotype122	4	TRB:CASSLGGGNTGQLYF;TRA:CAVSDSGYNKLTF
clone_119_seq_2	H11_PD1_KO_clonotype123	4	TRB:CASSYYWGGDAEQFF;TRA:CALGERNNNNAPRF
clone_120_seq_2	H11_PD1_KO_clonotype124	4	TRB:CASSLRDWGAGTGQLYF;TRA:CALGTGNTGKLIF;TRA:CAVNYLPGTGSNRLTF
clone_121_seq_2	H11_PD1_KO_clonotype125	4	TRB:CASSLMGQGAGNTLYF;TRA:CAASAADTNAYKVIF;TRA:CASNNAGAKLTF
clone_122_seq_2	H11_PD1_KO_clonotype126	4	TRB:CASSLTNQDTQYF;TRB:CASSPTGNEQYF;TRA:CATTTASLGKLQF
clone_123_seq_2	H11_PD1_KO_clonotype128	4	TRB:CASGDRDRNTEVFF;TRB:CASSFGVVNTEVFF;TRA:CAAEGVDSNYQLIW
clone_124_seq_2	H11_PD1_KO_clonotype129	4	TRB:CASSAPNSDYTF;TRB:CASSQTGGLGEQYF;TRA:CVSYNTNTGKLTF
clone_125_seq_2	H11_PD1_KO_clonotype64	4	TRB:CASSDAYNTLYF;TRA:CAAKDTGGNNKLTF
clone_126_seq_2	H11_PD1_KO_clonotype95	4	TRB:CTCSAGRGHTEVFF
clone_127_seq_2	H11_PD1_KO_clonotype114	3	TRB:CASSPRRHSDYTF;TRA:CAARLTGNTGKLIF;TRA:CALSELHNVGDNSKLIW
clone_128_seq_2	H11_PD1_KO_clonotype116	3	TRB:CASSQAGNSGNTLYF;TRA:CAAEFLSNYNVLYF;TRA:CAVRDRNYGSSGNKLIF
clone_129_seq_2	H11_PD1_KO_clonotype127	3	TRB:CASGDRGYGSDYTF;TRB:CASSRQFNERLFF;TRA:CAIDRPGGYKVVF
clone_130_seq_2	H11_PD1_KO_clonotype130	3	TRB:CASSPDWGGNYAEQFF;TRB:CASSPRDWGTDTQYF;TRA:CAVRRSGSWQLIF
clone_131_seq_2	H11_PD1_KO_clonotype131	3	TRB:CASSDGDTQYF;TRA:CAFDNNNAPRF
clone_132_seq_2	H11_PD1_KO_clonotype132	3	TRB:CASRQGTLYF;TRB:CTCSAGDTQYF;TRA:CAMGGGNNKLTF
clone_133_seq_2	H11_PD1_KO_clonotype133	3	TRB:CASSDGGGPDYTF;TRA:CAAEAASSGSWQLIF;TRA:CAIDLGGSNAKLTF
clone_134_seq_2	H11_PD1_KO_clonotype134	3	TRB:CASSGYAEQFF;TRB:CASSLSTNSAETLYF;TRA:CAVSVMSNYNVLYF
clone_135_seq_2	H11_PD1_KO_clonotype136	3	TRB:CASSQEGRNTEVFF;TRB:CASSSKNERLFF;TRA:CVLSYGSSGNKLIF
clone_136_seq_2	H11_PD1_KO_clonotype137	3	TRB:CASSLKGGEVFF;TRA:CAVSYYQGGRALIF
clone_137_seq_2	H11_PD1_KO_clonotype138	3	TRB:CASSQDWGRYEQYF;TRB:CASSQEGRTGSYEQYF;TRA:CAAAPGTGYQNFYF
clone_138_seq_2	H11_PD1_KO_clonotype141	3	TRB:CASSGGGYAEQFF;TRA:CAASDTEGADRLTF
clone_139_seq_2	H11_PD1_KO_clonotype142	3	TRB:CASSLEQNTEVFF;TRA:CAAGTGYQNFYF;TRA:CALSETNYGNEKITF
clone_140_seq_2	H11_PD1_KO_clonotype143	3	TRB:CASSFPGGYEQYF;TRA:CAAGGGSNAKLTF
clone_141_seq_2	H11_PD1_KO_clonotype144	3	TRB:CASSLTGRTEVFF;TRA:CAARATASLGKLQF
clone_142_seq_2	H11_PD1_KO_clonotype145	3	TRB:CASSLYSGNTLYF;TRA:CAASLNTGNYKYVF
clone_143_seq_2	H11_PD1_KO_clonotype146	3	TRB:CASSLNRRDTQYF;TRB:CASSRLGGGQDTQYF;TRA:CAVSPNNYAQGLTF
clone_144_seq_2	H11_PD1_KO_clonotype148	3	TRB:CTCSPRQTGQLYF;TRA:CALSEGANTGKLTF
clone_145_seq_2	H11_PD1_KO_clonotype149	3	TRB:CTCSAQGNSPLYF;TRA:CAASHNTNTGKLTF
clone_146_seq_2	H11_PD1_KO_clonotype151	3	TRB:CASSPQGDQDTQYF;TRA:CAVRDTNAYKVIF
clone_147_seq_2	H11_PD1_KO_clonotype152	3	TRB:CASSFDRLDTEVFF;TRB:CASSLEGGDAEQFF;TRB:CASSWTGQDTQYF;TRA:CAASANYNQGKLIF;TRA:CALKGGGGNYKPTF
clone_148_seq_2	H11_PD1_KO_clonotype153	3	TRB:CASSLEGGLFEQYF;TRA:CAMREGQGSNNRLTL
clone_149_seq_2	H11_PD1_KO_clonotype154	3	TRB:CASSQDGGWQNTLYF;TRA:CAMRENQGGSAKLIF
clone_150_seq_2	H11_PD1_KO_clonotype155	3	TRB:CASSQDGRTGNERLFF;TRA:CAATRNNNNAPRF
clone_151_seq_2	H11_PD1_KO_clonotype156	3	TRB:CASSRDRGGTGQLYF;TRA:CAASDYNQGKLIF
clone_152_seq_2	H11_PD1_KO_clonotype157	3	TRB:CASSLDGRGYEQYF;TRA:CAASERTTNAYKVIF
clone_153_seq_2	H11_PD1_KO_clonotype159	3	TRB:CASSRDAGGNYAEQFF;TRA:CAMRERNNYAQGLTF
clone_154_seq_2	H11_PD1_KO_clonotype160	3	TRB:CASSPGNQAPLF;TRA:CALSDSGGSNAKLTF
clone_155_seq_2	H11_PD1_KO_clonotype161	3	TRB:CASGDASANSDYTF;TRA:CALERNAGAKLTF
clone_156_seq_2	H11_PD1_KO_clonotype162	3	TRB:CASGDGGDNSPLYF;TRB:CASSSPGTGKDTQYF;TRA:CAAISSGSWQLIF
clone_157_seq_2	H11_PD1_KO_clonotype163	3	TRB:CASSFRDTYAEQFF;TRA:CAVDDTNAYKVIF
clone_158_seq_2	H11_PD1_KO_clonotype164	3	TRB:CASGDEGGALAEQFF;TRA:CAVRLMATGGNNKLTF
clone_159_seq_2	H11_PD1_KO_clonotype135	2	TRB:CASSSGTGYEQYF;TRA:CALRISANSGTYQRF
clone_160_seq_2	H11_PD1_KO_clonotype139	2	TRB:CTCSAGDTQYF;TRA:CAASLANYGNEKITF
clone_161_seq_2	H11_PD1_KO_clonotype140	2	TRB:CASSQGTGSSYEQYF;TRA:CALNRGSALGRLHF
clone_162_seq_2	H11_PD1_KO_clonotype147	2	TRB:CASNRDRGYAEQFF;TRA:CAVTPNTNTGKLTF
clone_163_seq_2	H11_PD1_KO_clonotype150	2	TRB:CASSTTGGAWAEQFF;TRA:CALGVNYGSSGNKLIF;TRA:CVLGDQGGRALIF
clone_164_seq_2	H11_PD1_KO_clonotype158	2	TRB:CASSFWGQGGNTLYF;TRA:CAVTRYNVLYF
clone_165_seq_2	H11_PD1_KO_clonotype165	2	TRB:CAWSLDWVYF;TRA:CAIDRASSSFSKLVF
clone_166_seq_2	H11_PD1_KO_clonotype166	2	TRB:CTCSARDRGNSDYTF;TRB:CTCSSGGSYAEQFF;TRA:CAADSGNKLTF
clone_167_seq_2	H11_PD1_KO_clonotype167	2	TRB:CGALSSYEQYF;TRA:CAAFNSAGNKLTF;TRA:CALSSRNMGYKLTF
clone_168_seq_2	H11_PD1_KO_clonotype170	2	TRB:CASRDSAETLYF;TRB:CASSDAWGINYAEQFF;TRA:CAAEPTGGNNKLTF
clone_169_seq_2	H11_PD1_KO_clonotype171	2	TRB:CGASGGQNTLYF;TRA:CAASENSNNRIFF
clone_170_seq_2	H11_PD1_KO_clonotype172	2	TRB:CASSPNQDTQYF;TRA:CAASPSSNTNKVVF
clone_171_seq_2	H11_PD1_KO_clonotype174	2	TRB:CATLGTSQNTLYF;TRA:CALGIHSNYQLIW
clone_172_seq_2	H11_PD1_KO_clonotype175	2	TRB:CASNRGGTEVFF;TRA:CAARTGGYKVVF
clone_173_seq_2	H11_PD1_KO_clonotype176	2	TRB:CASSEGAETLYF;TRA:CAASGGYKVVF
clone_174_seq_2	H11_PD1_KO_clonotype177	2	TRB:CGARLGGDSDYTF;TRA:CAARPSSSFSKLVF
clone_175_seq_2	H11_PD1_KO_clonotype178	2	TRB:CASSRTGEEQYF;TRA:CAIGNYAQGLTF
clone_176_seq_2	H11_PD1_KO_clonotype179	2	TRB:CASSDQGAGAEQFF;TRB:CAWSWGFQDTQYF;TRA:CILRVEEGGSAKLIF
clone_177_seq_2	H11_PD1_KO_clonotype180	2	TRB:CASSAQSSYEQYF;TRA:CAAEVYTEGADRLTF
clone_178_seq_2	H11_PD1_KO_clonotype184	2	TRB:CASSRDWGYEQYF;TRA:CAASPRNNNNAPRF
clone_179_seq_2	H11_PD1_KO_clonotype185	2	TRB:CASSDYSGNTLYF;TRA:CAAYTNAYKVIF
clone_180_seq_2	H11_PD1_KO_clonotype186	2	TRB:CASSPRANTGQLYF;TRA:CAVRDFMDYANKMIF
clone_181_seq_2	H11_PD1_KO_clonotype187	2	TRB:CGARDWESSYEQYF;TRA:CAVSPLPGTGSNRLTF
clone_182_seq_2	H11_PD1_KO_clonotype188	2	TRB:CASRLGETLYF;TRA:CATLTNSAGNKLTF
clone_183_seq_2	H11_PD1_KO_clonotype189	2	TRB:CAWSLGGGAETLYF;TRA:CAASTNAYKVIF
clone_184_seq_2	H11_PD1_KO_clonotype191	2	TRB:CGARDHGHQNTLYF;TRA:CALSNSGTYQRF
clone_185_seq_2	H11_PD1_KO_clonotype192	2	TRB:CASSPGVDTEVFF;TRA:CAASARNYAQGLTF
clone_186_seq_2	H11_PD1_KO_clonotype193	2	TRB:CASSLEGRDNSPLYF;TRB:CTCSAENEQYF;TRA:CALREGSNNRIFF
clone_187_seq_2	H11_PD1_KO_clonotype194	2	TRB:CASGDAQSNTEVFF;TRA:CALGNSGTYQRF
clone_188_seq_2	H11_PD1_KO_clonotype197	2	TRB:CASSPRGYEQYF;TRA:CALEPGDYNQGKLIF;TRA:CVLTLNSGGSNAKLTF
clone_189_seq_2	H11_PD1_KO_clonotype198	2	TRB:CASSLRRTEVFF;TRA:CAMRVPATSSGQKLVF
clone_190_seq_2	H11_PD1_KO_clonotype199	2	TRB:CASSADRGRERLFF;TRA:CALSITGNTGKLIF
clone_191_seq_2	H11_PD1_KO_clonotype200	2	TRB:CASSYQGGTEVFF;TRA:CAVTQTTASLGKLQF
clone_192_seq_2	H11_PD1_KO_clonotype201	2	TRB:CASSQERGGETLYF;TRB:CASSQGTGSSYEQYF;TRA:CAASETTGGNNKLTF
clone_193_seq_2	H11_PD1_KO_clonotype202	2	TRB:CASSLGRGEQYF;TRA:CAASDTEGADRLTF
clone_194_seq_2	H11_PD1_KO_clonotype203	2	TRB:CASSPRQANTEVFF;TRA:CAAHRGSALGRLHF
clone_195_seq_2	H11_PD1_KO_clonotype204	2	TRB:CASSQELGSAETLYF;TRA:CALSDGTGYQNFYF;TRA:CAMERGSGGSNAKLTF
clone_196_seq_2	H11_PD1_KO_clonotype206	2	TRB:CASSLSISGFSGNTLYF;TRA:CALGNMGYKLTF
clone_197_seq_2	H11_PD1_KO_clonotype207	2	TRB:CASSLNSQDTQYF;TRA:CAMSDSNNRIFF
clone_198_seq_2	H11_PD1_KO_clonotype209	2	TRB:CASSPDWGYEQYF;TRA:CAVSETASLGKLQF
clone_199_seq_2	H11_PD1_KO_clonotype210	2	TRB:CASGEQGRSAETLYF;TRA:CAAEAWANYNVLYF;TRA:CAVSSAYKVIF
clone_200_seq_2	H11_PD1_KO_clonotype211	2	TRB:CASSGVRGHSGNTLYF;TRA:CAVKGADRLTF
clone_201_seq_2	H11_PD1_KO_clonotype212	2	TRB:CASSLDISNERLFF;TRA:CAIDRDNYAQGLTF
clone_202_seq_2	H11_PD1_KO_clonotype214	2	TRB:CASSFPGRDQAPLF;TRA:CAASSMGYKLTF
clone_203_seq_2	H11_PD1_KO_clonotype216	2	TRB:CASSHWGGAETLYF;TRA:CAVSPSNMGYKLTF
clone_204_seq_2	H11_PD1_KO_clonotype217	2	TRB:CASSLQGANSDYTF;TRA:CAASKGGTNAYKVIF
clone_205_seq_2	H11_PD1_KO_clonotype218	2	TRB:CASSLGDRDGEQYF;TRA:CAVSAGANTGKLTF
clone_206_seq_2	H11_PD1_KO_clonotype221	2	TRB:CASSILGVYAEQFF;TRB:CASSRKQGTEVFF;TRA:CAVSENYAQGLTF
clone_207_seq_2	H11_PD1_KO_clonotype222	2	TRB:CASSGLGGLEQYF;TRA:CAMRGMDYANKMIF
clone_208_seq_2	H11_PD1_KO_clonotype223	2	TRB:CASSLGGTGQLYF;TRA:CAASHNYGNEKITF;TRA:CAVSADSNNRLTL
clone_209_seq_2	H11_PD1_KO_clonotype224	2	TRB:CASSLSTDNNQAPLF;TRB:CASSQEGLGGYEQYF;TRA:CALSDETGNYKYVF
clone_210_seq_2	H11_PD1_KO_clonotype226	2	TRB:CASSRGTDTEVFF;TRA:CAVSMETGGYKVVF
clone_211_seq_2	H11_PD1_KO_clonotype227	2	TRB:CASSLGLGGLEQYF;TRA:CAMREGNSGGSNAKLTF
clone_212_seq_2	H11_PD1_KO_clonotype228	2	TRB:CASSLAGSNQAPLF;TRA:CALSGGGYKVVF
clone_213_seq_2	H11_PD1_KO_clonotype229	2	TRB:CASSQTGRSAETLYF;TRA:CAADRGSALGRLHF;TRA:CAAEVLSNYNVLYF
clone_214_seq_2	H11_PD1_KO_clonotype230	2	TRB:CASSPGTGGRDTQYF;TRA:CAARAGGYKVVF;TRA:CAASGEGGRALIF
clone_215_seq_2	H11_PD1_KO_clonotype231	2	TRB:CASSGQGAGTGQLYF;TRA:CAALNNNNAPRF;TRA:CVVGATNTNKVVF
clone_216_seq_2	H11_PD1_KO_clonotype232	2	TRB:CASSMTISGNTLYF;TRA:CAASTLSSGSWQLIF
clone_217_seq_2	H11_PD1_KO_clonotype233	2	TRB:CASSQDTYSGNTLYF;TRA:CAVSAWGSNTNKVVF
clone_218_seq_2	H11_PD1_KO_clonotype234	2	TRB:CASSRDLGGSYEQYF;TRB:CASSSRGAGNERLFF;TRA:CAASMPGGNYKPTF
clone_219_seq_2	H11_PD1_KO_clonotype235	2	TRB:CASSRRGDSAETLYF;TRA:CAVRESSGSWQLIF
clone_220_seq_2	H11_PD1_KO_clonotype236	2	TRB:CASSQEGQGTNERLFF;TRA:CALGANSGTYQRF
clone_221_seq_2	H11_PD1_KO_clonotype238	2	TRB:CASSWTGGENTLYF;TRA:CALGDGNNAGAKLTF
clone_222_seq_2	H11_PD1_KO_clonotype239	2	TRB:CASSIRGGEQYF;TRA:CAASPSSGQKLVF
clone_223_seq_2	H11_PD1_KO_clonotype240	2	TRB:CASRGGQNERLFF;TRB:CASSQDWGSSYEQYF;TRA:CAAESNTGYQNFYF
clone_224_seq_2	H11_PD1_KO_clonotype241	2	TRB:CASSPTGADSDYTF;TRA:CAARANSGTYQRF
clone_225_seq_2	H11_PD1_KO_clonotype242	2	TRB:CASSIGGANTLYF;TRA:CAASLNSGGSNAKLTF
clone_226_seq_2	H11_PD1_KO_clonotype243	2	TRB:CASSLEGQLSNERLFF;TRB:CASSQEGTGGNEQYF;TRA:CAAGTGGYKVVF;TRA:CALGDQVGDNSKLIW
clone_227_seq_2	H11_PD1_KO_clonotype244	2	TRB:CASSSGRRSGNTLYF;TRA:CALSDPGSSGNKLIF
clone_228_seq_2	H11_PD1_KO_clonotype245	2	TRB:CASSLARRSGNTLYF;TRA:CAVSAGNYNQGKLIF
clone_229_seq_2	H11_PD1_KO_clonotype246	2	TRB:CASSLGGGAENTLYF;TRA:CALGEPNTNKVVF
clone_230_seq_2	H11_PD1_KO_clonotype247	2	TRB:CASSPLGGSAETLYF;TRA:CAMESNMGYKLTF
clone_231_seq_2	H11_PD1_KO_clonotype249	2	TRB:CARPWGHYAEQFF;TRB:CASGGTGGAEQFF;TRA:CALGDGNMGYKLTF
clone_232_seq_2	H11_PD1_KO_clonotype250	2	TRB:CASSSQGAGGERLFF;TRA:CALEGPPGANTGKLTF
clone_233_seq_2	H11_PD1_KO_clonotype251	2	TRB:CASSLQGACAETLYF;TRA:CALEGPTGANTGKLTF
clone_234_seq_2	H11_PD1_KO_clonotype252	2	TRB:CASSIGTANTEVFF;TRA:CALVDQGNMGYKLTF
clone_235_seq_2	H11_PD1_KO_clonotype253	2	TRB:CASSRGTGEGAETLYF;TRA:CALSAPWEGIFF
clone_236_seq_2	H11_PD1_KO_clonotype254	2	TRB:CASSFFWGGRQNTLYF;TRA:CALERGTNTGKLTF
clone_237_seq_2	H11_PD1_KO_clonotype255	2	TRB:CTCSAVGAGQNTLYF;TRA:CALMAGGSNAKLTF
clone_238_seq_2	H11_PD1_KO_clonotype256	2	TRB:CASSMGGAPYAEQFF;TRA:CAMRASSGSWQLIF
clone_239_seq_2	H11_PD1_KO_clonotype257	2	TRB:CASSLGAGQDTQYF;TRB:CASSQEGRTDNERLFF;TRA:CAASPSNTNKVVF;TRA:CATDTNAYKVIF
clone_240_seq_2	H11_PD1_KO_clonotype259	2	TRB:CASSLEYEQYF;TRA:CAASAEGTGSKLSF;TRA:CAASSGGNNKLTF
clone_241_seq_2	H11_PD1_KO_clonotype262	2	TRB:CASSWGENTLYF;TRA:CAAPEITGNTGKLIF;TRA:CAATMNYNQGKLIF
[truncated: 1,849 more rows]

## Sheet: PD1KO2
Tcell_clone_rank	clonotype_id	count	cdr3s_aa
[truncated: 1,165 more rows]
