# Supplementary material for: Propionyl-CoA carboxylase subunit B regulates anti-tumor T cells in a pancreatic cancer mouse model
Source: eLife. 2025 Mar 11;13:RP96925. doi: 10.7554/eLife.96925 (PMC11896608; doi:10.7554/eLife.96925)
Supplement: Supplementary file 3. [file elife-96925-supp3.xlsx]

## Sheet: Sheet1
Time (minutes)	Control	Control	Control	Control	Control	Control	Control	Control	Control	Control	Control	Control	KPC 10	KPC 10	KPC 10	KPC 10	KPC 10	KPC 10	KPC 10	KPC 10	KPC 10	KPC 10	KPC 10	KPC 10	KPC 20	KPC 20	KPC 20	KPC 20	KPC 20	KPC 20	KPC 20	KPC 20	KPC 20	KPC 20	KPC 20	KPC 20	aKO 10	aKO 10	aKO 10	aKO 10	aKO 10	aKO 10	aKO 10	aKO 10	aKO 10	aKO 10	aKO 10	aKO 10	aKO 20
1.30899	0	0	0	0	0	0	0	0	0	0	0	0	1.86844	1.9761	1.75706	1.83286	2.31367	1.66755	1.60915	1.72564					1.55041	1.6095	1.85676	1.59353	1.55331	1.70948	1.66634	1.87547					1.35083	1.06993	1.13925	1.23023	1.20494	1.2868	1.31541	1.48295					1.57051
7.76976	0	0	0	0	0	0	0	0	0	0	0	0	1.68528	1.8093	1.67492	1.73537	2.19359	1.59358	1.55529	1.60428					1.39803	1.50564	1.71693	1.50114	1.46634	1.60241	1.57952	1.70867					1.17893	0.996518	1.08085	1.16059	1.1419	1.17662	1.22141	1.33721					1.42228
14.2317	0	0	0	0	0	0	0	0	0	0	0	0	1.65187	1.77792	1.64915	1.71049	2.1596	1.57502	1.54109	1.58166					1.36715	1.48141	1.67495	1.46918	1.43949	1.56757	1.55519	1.6789					1.11524	0.986013	1.07316	1.13121	1.12109	1.14067	1.19803	1.29284					1.37785
20.7931	0	0	0	0	0	0	0	0	0	0	0	0	0.662363	0.727342	0.716315	0.812537	0.885593	0.708597	0.647509	0.617828					0.562992	0.550283	0.655714	0.548148	0.523935	0.579515	0.539218	0.633303					0.481989	0.415989	0.486051	1.11964	0.478502	0.479761	0.503108	0.499387					0.545798
27.2578	0	0	0	0	0	0	0	0	0	0	0	0	0.636798	0.692545	0.665187	0.747628	0.859289	0.679766	0.631174	0.61528					0.52795	0.539858	0.636133	0.545711	0.533255	0.574544	0.55822	0.620461					0.477583	0.443056	0.493345	1.10204	0.497994	0.491161	0.533434	0.538753					0.557127
33.7255	0	0	0	0	0	0	0	0	0	0	0	0	0.659661	0.710522	0.679053	0.752974	0.887027	0.695548	0.667429	0.637032					0.532516	0.561495	0.659364	0.567306	0.558804	0.61025	0.586146	0.637758					0.487719	0.445982	0.502451	1.07217	0.523086	0.511992	0.546784	0.550714					0.584113
40.2854	0	0	0	0	0	0	0	0	0	0	0	0	2.09632	2.16809	2.05536	2.48489	2.67398	1.66592	2.4168	0.670907					1.86204	2.32765	2.03649	1.91558	1.71187	2.63599	2.67438	2.27839					1.3342	1.55129	0.559139	1.07988	0.579344	0.561058	1.54927	1.56567					2.30035
46.7559	0	0	0	0	0	0	0	0	0	0	0	0	2.36456	2.37521	2.2297	2.49157	2.8928	1.89715	2.32561	0.681142					2.22747	2.20542	2.45243	2.32665	2.12214	2.37907	2.47091	2.71045					1.26151	1.47183	0.553366	1.06922	0.583978	0.564529	1.43923	1.48912					2.2508
53.2253	0	0	0	0	0	0	0	0	0	0	0	0	2.49244	2.4537	2.28481	2.47907	2.94126	2.02777	2.29473	0.654512					2.34324	1.81476	2.6656	2.31566	2.28584	2.01307	2.1595	2.65267					1.23525	1.43252	0.524748	1.07426	0.554884	0.524928	1.38768	1.45247					2.2027
59.7849	0	0	0	0	0	0	0	0	0	0	0	0	0.364619	0.392995	0.351314	0.435303	0.439512	0.369251	0.347896	0.272356					0.336586	0.268363	0.337495	0.286145	0.283739	0.299795	0.271473	0.32081					0.285492	0.251516	0.444325	1.02375	0.268317	0.199571	0.266714	0.260983					0.317033
66.2541	0	0	0	0	0	0	0	0	0	0	0	0	0.326953	0.355085	0.333162	0.39774	0.433314	0.349991	0.338592	0.25212					0.296337	0.273816	0.331165	0.284845	0.275884	0.302162	0.283418	0.318388					0.242334	0.222421	0.403928	0.996094	0.234629	0.183359	0.247513	0.264275					0.296539
72.7292	0	0	0	0	0	0	0	0	0	0	0	0	0.312051	0.345165	0.329011	0.386066	0.42248	0.337309	0.331225	0.251346					0.284796	0.267885	0.321807	0.280218	0.277525	0.296475	0.286009	0.313044					0.247153	0.222287	0.375311	1.01181	0.239714	0.175041	0.242051	0.261303					0.290853
[truncated: 35 more columns]
