# Supplementary material for: Propionyl-CoA carboxylase subunit B regulates anti-tumor T cells in a pancreatic cancer mouse model
Source: eLife. 2025 Mar 11;13:RP96925. doi: 10.7554/eLife.96925 (PMC11896608; doi:10.7554/eLife.96925)
Supplement: Supplementary file 4. [file elife-96925-supp4.xlsx]

## Sheet: Sheet1
compound	aKO_1	aKO_2	aKO_3	p-aKO1	p-aKO2	p-aKO3
Histidine	1.79137e+07	1.87691e+07	1.55892e+07	1.67003e+07	1.90218e+07	1.82227e+07
PosIS_Glutamine-2H5-15N2	6.52984e+07	6.25886e+07	6.95914e+07	6.02305e+07	5.7191e+07	5.99526e+07
PosIS_Lysine-2H8	1.48335e+06	1.57023e+06	1.45804e+06	1.4631e+06	1.52373e+06	1.42998e+06
Glutamate	1.38116e+08	1.39766e+08	1.52682e+08	1.27726e+08	1.44971e+08	1.45651e+08
Lysine	2.03629e+07	2.44613e+07	1.98676e+07	2.54069e+07	3.07673e+07	2.66013e+07
Glutamine	5.35695e+07	5.59212e+07	4.54285e+07	5.30975e+07	7.55844e+07	6.96882e+07
Deoxycarnitine	315538	266972	433569	552775	159892	177989
4-Guanidinobutyrate	345446	356544	419545	251680	270191	284962
3-Methylglutaconate	44348.3	53900.7	50074.9	66985.3	69362.3	58179.4
Guanine	97325.9	105097	144845	77523.3	73326	103966
Methionine	1.19386e+07	1.27054e+07	1.29123e+07	1.46183e+07	2.48712e+07	1.63955e+07
Glycerol 3-phosphate	659114	706885	753083	491264	601040	506839
Methyl-histidine	86674.3	103795	97218.3	116896	139454	133616
Pyridoxine	6.41575e+07	6.76652e+07	6.65517e+07	6.79596e+07	8.47615e+07	7.01453e+07
N-Acetyl-aspartate	8703.37	8671.2	9923.73	7781.55	3777.6	7150.3
Arginine	4.43408e+07	4.77084e+07	4.44769e+07	4.79283e+07	5.16722e+07	4.77218e+07
Aconitate	8992.13	9779.92	9528.12	9003.36	6249.71	7487.45
Quinoline-4-carboxylic acid	306306	319497	334792	269844	371802	288386
Carnitine	4.32095e+06	3.77373e+06	5.78965e+06	8.27563e+06	3.22528e+06	3.83166e+06
Uric acid	161812	182229	170984	182062	181584	253857
Isovalerylglycine	735920	744132	798410	901061	1.06307e+06	942237
Indole-3-acetaldehyde	90554.4	113742	109957	143015	163506	139222
PosIS_Methionine-2H8	2.43181e+06	2.29167e+06	2.43218e+06	2.35532e+06	2.8752e+06	2.53063e+06
Pyridoxal	128568	161106	199483	230579	239519	218472
Methionine sulfoxide	660054	690182	700364	785916	857479	825861
Phenylalanine	7.97123e+07	8.80259e+07	8.49556e+07	9.89007e+07	1.17159e+08	1.01686e+08
Proline	7.23129e+06	6.65781e+06	7.52294e+06	8.43369e+06	8.39903e+06	8.83751e+06
Creatinine	323719	354715	552562	415426	448862	391839
PosIS_Serine-13C3-15N1	845412	763242	786029	781201	762172	754643
Hypotaurine	2.08602e+06	1.97602e+06	2.651e+06	2.62211e+06	2.19059e+06	2.35253e+06
Threonine	3.42839e+07	3.60118e+07	3.73758e+07	3.87364e+07	4.49239e+07	4.03887e+07
Valine	5.58034e+07	6.11594e+07	5.82666e+07	6.79027e+07	7.45588e+07	6.98535e+07
Guanidineacetic acid	5.80888e+07	5.33142e+07	6.2941e+07	2.26903e+07	3.30565e+07	3.65374e+07
Trimethylglycine (Betaine)	1.26135e+07	1.30702e+07	1.79436e+07	1.22503e+08	6.36898e+06	5.92752e+06
1-Aminocyclopropanecarboxylate	4.16267e+06	4.37076e+06	4.67526e+06	4.61884e+06	5.29265e+06	4.79708e+06
Beta-Alanine	5.69376e+06	5.60343e+06	7.43967e+06	8.33004e+06	6.16602e+06	6.59073e+06
Alanine	2.37993e+07	2.64293e+07	2.9274e+07	2.95813e+07	3.34328e+07	3.46437e+07
2 3-Butanedione	528000	538620	680506	759149	860985	950907
Glycine	2.47108e+06	2.34173e+06	3.25387e+06	3.13937e+06	3.298e+06	3.31521e+06
Diethanolamine	2.23587e+06	2.02797e+06	2.75415e+06	1.9963e+06	2.24595e+06	1.9032e+06
Serine	5.19864e+06	5.03472e+06	5.45954e+06	5.54801e+06	7.1708e+06	6.63944e+06
Choline	1.30874e+08	1.17665e+08	9.9249e+07	1.46435e+08	1.33638e+08	1.13802e+08
4-Aminobutyrate (GABA)	2.82542e+06	2.91361e+06	3.58767e+06	3.93262e+06	4.63503e+06	4.87436e+06
N-Formylglycine	21377.6	21380.7	22350.2	23400.8	36604.4	27371.7
Methylnicotinamide	2.40441e+06	2.22332e+06	2.53039e+06	2.16477e+06	7.49199e+06	8.01487e+06
Hypoxanthine	93441.8	228605	259172	300170	281556	416244
Adenine	1.34671e+06	1.39127e+06	1.77965e+06	1.4935e+06	1.29231e+06	1.76797e+06
Aspartate	1.00181e+06	1.10664e+06	1.51248e+06	1.46547e+06	1.38596e+06	1.51393e+06
Ornithine	1.78406e+06	2.00106e+06	1.69413e+06	2.12016e+06	2.43034e+06	2.15784e+06
Asparagine	159626	119993	225156	155084	165731	186966
PosIS_Ornithine-2H6	3.20086e+06	3.21774e+06	3.05618e+06	2.8803e+06	2.87541e+06	2.87428e+06
Taurine	1.71312e+07	1.61823e+07	2.15374e+07	2.23039e+07	1.91501e+07	1.9669e+07
Leucine	1.01234e+08	1.09359e+08	1.03049e+08	1.24882e+08	1.20043e+08	1.29182e+08
Nicotinamide	1.08358e+07	1.27653e+07	1.05239e+07	1.3201e+07	1.66303e+07	1.32383e+07
Isoleucine	1.14468e+08	1.28127e+08	1.2306e+08	1.41719e+08	1.54195e+08	1.47708e+08
Creatine	9.92861e+07	9.52649e+07	1.1824e+08	1.08741e+08	1.33174e+08	1.45034e+08
Itaconic acid	234710	232771	242716	222432	232895	249311
Acetylputrescine	627598	717931	782256	606567	930487	1.07857e+06
UDP	330160	296759	376527	358311	313810	325615
CDP	18110.2	26983	28785.2	31744.1	34382.7	30127.3
Palmitoyl-Carnitine	83951.6	91889	127040	168558	93572.9	93875.7
S-Adenosylmethionine	540489	530786	737731	486593	440102	451222
Pregnenolone sulfate	172683	138276	186385	128009	146422	128480
Indole-3-acetate	1.66813e+06	1.89437e+06	1.59655e+06	1.84145e+06	2.62806e+06	1.84017e+06
Riboflavin	66173.6	74002.6	63587.8	76090.1	96426.1	63217.7
GMP	5773.55	8074.97	9737.77	5278.13	7982.71	8652.93
IMP	3681.34	3175.92	8495.6	2951.11	7137.77	10962.7
AMP	347076	360130	746461	434385	424435	535439
S-Adenosyl-homocysteine	55378.5	51921.2	83416.7	67567.1	57189.9	59860.2
Hydrocortisone 21-acetate	138611	121335	154358	123384	160167	122059
Folic acid	191363	218735	198606	251599	273433	251416
ADP	186119	186327	299648	184869	225706	245526
Thiamine pyrophosphate	10345.8	7943.49	12091.2	11548.8	8233.45	5515
GDP	12377.7	12577.4	23215.3	15809.9	21092.9	20531.2
N-Acetylneuraminic acid	44829.8	41273.9	51218.5	41738.9	59581.6	58258.1
Glutathione	5.39473e+07	5.14823e+07	7.04485e+07	6.47519e+07	4.23841e+07	4.41835e+07
5-Deoxy-5-(methylthio)adenosine	780443	965975	956638	725322	967754	880802
Ophthalmate	65107.2	88226.2	82580.8	128530	68127.8	99110.3
Xanthosine	24794.4	31595.5	31828.1	22813.6	40701.8	29431.5
Guanosine	83967.7	83817.3	100033	89635.6	88654.8	82195.4
Arginino-succinate	8673.9	9408.92	12301.2	13069.8	9416.2	14748.8
dAMP	106943	111478	120795	84990.8	98456.1	108457
3 5-cAMP	12312.6	14755.3	19692.9	23039.7	15105.6	14856.3
UMP	36558.6	39578.2	57491.1	58626.9	39823.4	47334.2
CMP	38128	32081.4	44454	36720	35816.5	39989.7
PosIS_Alanine-2H4-15N	9.56997e+07	9.22806e+07	9.78256e+07	9.1083e+07	8.44205e+07	9.11695e+07
CTP	129478	120516	147419	137562	176999	168240
PosIS_Glycine-13C2_15N1	1.68177e+06	1.63613e+06	1.70528e+06	1.67495e+06	1.58263e+06	1.61849e+06
PosIS_Inosine-15N4	5.41272e+06	7.65375e+06	4.95475e+06	8.35712e+06	8.08168e+06	7.71062e+06
PosIS_Phosphorylcholine-2H9	1.23752e+07	1.21489e+07	1.19633e+07	1.19669e+07	1.20311e+07	1.19801e+07
ADP-Glucose	18690.6	18688.8	27160	22272	22970.3	19064
UDP-glucuronate	17004.6	26569	33666.8	24154	27040	30663.1
UDP-Glucose	38901.7	41726.3	44344.4	43231.9	36716.6	32694.4
GTP	40640.8	38385.4	58729.6	52215.1	57814.1	58082.6
ATP	1.55732e+06	1.48316e+06	1.85561e+06	1.8093e+06	2.1918e+06	1.90625e+06
CDP-choline	10467.6	6954.84	9648.8	12481.3	21670.5	21305.5
UTP	180679	153582	233403	219084	249482	241485
Acetyl CoA	34171.6	33736	37456.2	24454.5	27282.2	24402.5
FAD	20105.8	20064	11259.3	23321	17827.4	21971.5
Coenzyme A	29827.2	27207.7	39799.8	30642.6	23360.1	25228.2
NADPH	60060.3	62217.8	68086.6	45134.8	44032.2	43912.1
GDP-Mannose	14799.1	14357.5	19891.9	17637.2	14733.7	15493.1
NADP	29100.1	28606.3	45157.5	61015.3	57258.6	55231.4
NADH	134158	128978	160068	169897	127947	112289
NAD	1.26876e+06	1.27876e+06	1.76306e+06	1.50184e+06	1.50678e+06	1.6079e+06
Glutathione Disulfide	1.55274e+06	1.67096e+06	1.59239e+06	2.02226e+06	2.09293e+06	2.15416e+06
UDP-N-acetylglucosamine	860285	832338	1.13301e+06	992611	940731	941779
PosIS_Inositol-2H6	174573	161562	198093	179861	175859	200055
N-Acetyl-methionine	49136.5	36600.7	24230.8	25094.2	45886.2	35499.3
Isocitrate	7592.92	10376.8	16697	17579	19482.5	18066.4
Glucosamine	398598	471195	365443	540728	556195	502469
Mannosamine	398598	471195	365443	540728	556195	502469
N-carbamoyl-aspartate	40194.8	49542.9	58137.3	51801	58060.4	57298.1
Citrulline	49388.4	45137.5	69869.3	41150.4	43122	33758.7
O-Phospho-serine	89898.8	106863	143724	111113	101763	108915
Phosphocholine	8.97911e+07	8.52787e+07	1.00705e+08	8.40742e+07	9.89859e+07	9.45536e+07
Sorbitol	2.33584e+06	2.62623e+06	2.54116e+06	2.95883e+06	3.18851e+06	2.93036e+06
Tyrosine	2.37155e+07	2.64333e+07	2.55679e+07	2.95595e+07	3.27165e+07	2.9538e+07
Glycerophosphocholine	2.10533e+08	2.00196e+08	2.58889e+08	2.50509e+08	2.55822e+08	2.73026e+08
5-Deoxyadenosine	6771.2	10971.3	9797.49	10235.4	8088.62	9149.16
2-Deoxyadenosine	45213.8	53526.2	52113.9	34741.8	40763.4	30154.8
Cytidine	109879	123132	179012	105108	76383	99878.7
Inosine	63188	131296	138839	187284	161938	236672
Adenosine	454689	277920	372050	498668	520599	400533
Glucose 1-phosphate	41369.2	38333.5	57530.4	34280.4	31901.7	31360.9
Glucose 6-phosphate	43790.8	43779.8	45003.4	38846.1	49467.4	38969.1
Glucosamine 6-phosphate	12494.6	9597.63	11982.7	15642.7	17013.1	15180.5
Thiamine	1.19511e+07	1.3975e+07	1.15708e+07	1.39333e+07	1.6713e+07	1.46418e+07
Creatine phosphate	2.5541e+06	2.35655e+06	3.56207e+06	2.9046e+06	1.64731e+06	1.71006e+06
Kynurenine	64724.8	69445.1	71016.9	84597.8	99511.9	84805.2
2-methylcitrate	11654.9	12695.9	11836	15144.1	17997.6	16882.4
Tryptophan	2.30062e+07	2.4012e+07	2.38525e+07	2.69226e+07	3.23924e+07	2.78229e+07
Dimethyl-arginine	456440	565196	555840	513152	464990	456223
Deoxycytidine	121350	184533	219621	162974	204262	247352
Carnosine	78282.5	68122.6	74941.2	61693.7	98590.4	97540
Cystathionine	27957.1	29319.6	40283.1	9033.68	35392.7	30385.2
5-Hydroxy-L-tryptophan	43637.7	47948.2	51948.3	55709.3	86020.6	63705.5
Acetyl-arginine	205695	173166	244278	198430	132647	144073
2-Deoxy-D-glucose	9562.53	7318.13	5547.27	7739.55	15232.7	13203.6
7 8-Dihydro-L-biopterin	11909.5	11588.8	17109.1	39259	49879.4	29970.2
Biotin	8394.58	11730	18959	8932.23	5026.61	11033.1
Cytosine	420363	635964	782450	573814	699603	875629
Dihydrouracil	17171.7	16469.7	21372.6	14082.5	15852.6	14825
Fructose 1 6-bisphosphate	16937.9	16806.9	24375.4	27221.7	22214.9	23946.8
Glyceraldehyde-3-phosphate	1725.81	2476.16	2760.29	2703.78	2374.48	3681.06
Octopamine	44488.6	42392.8	54487.2	38390.1	51185.6	63548.1
