# Supplementary figures and images for: Propionyl-CoA carboxylase subunit B regulates anti-tumor T cells in a pancreatic cancer mouse model
Source: eLife journal article supplement (doi:10.7554/elife.96925), 2024-04-22

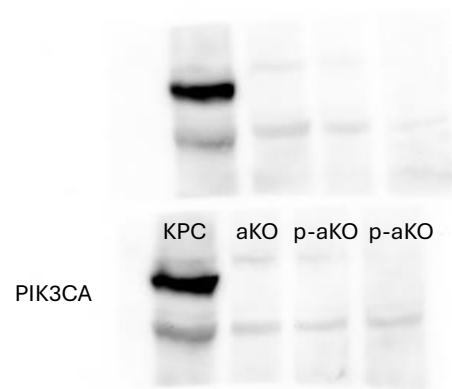

Supplement: fig3-data1 [file elife-96925-fig3-data1-v1.zip]

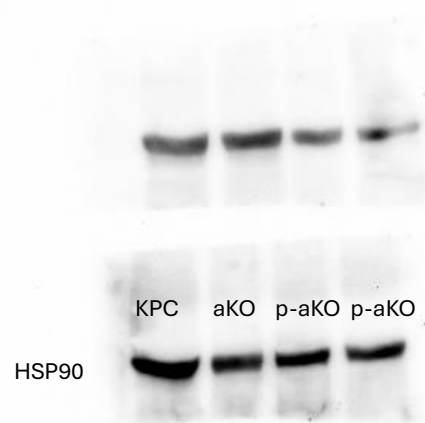

Supplement: fig3-data1 [file elife-96925-fig3-data1-v1.zip]

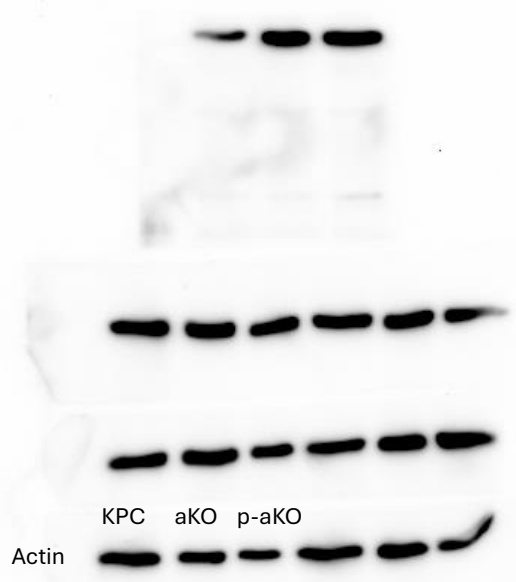

Supplement: fig3-data1 [file elife-96925-fig3-data1-v1.zip]

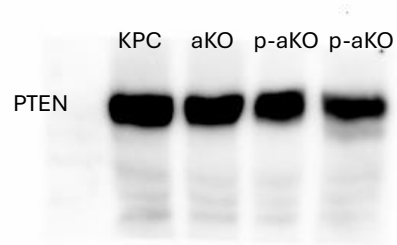

Supplement: fig3-data1 [file elife-96925-fig3-data1-v1.zip]

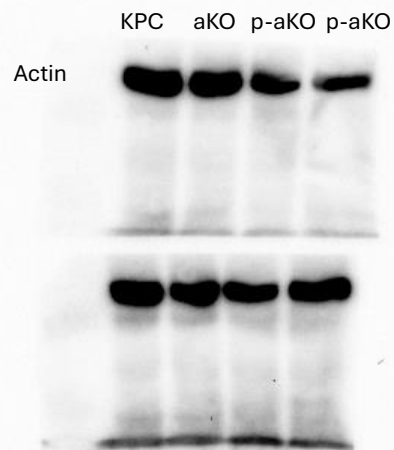

Supplement: fig3-data1 [file elife-96925-fig3-data1-v1.zip]

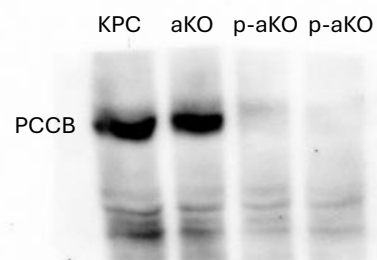

Supplement: fig3-data1 [file elife-96925-fig3-data1-v1.zip]

HSP90

| KPC                                                                               | aKO                                                                               | p-aKO                                                                             |
|-----------------------------------------------------------------------------------|-----------------------------------------------------------------------------------|-----------------------------------------------------------------------------------|
|  |  |  |

Supplement: fig3-data1 [file elife-96925-fig3-data1-v1.zip]

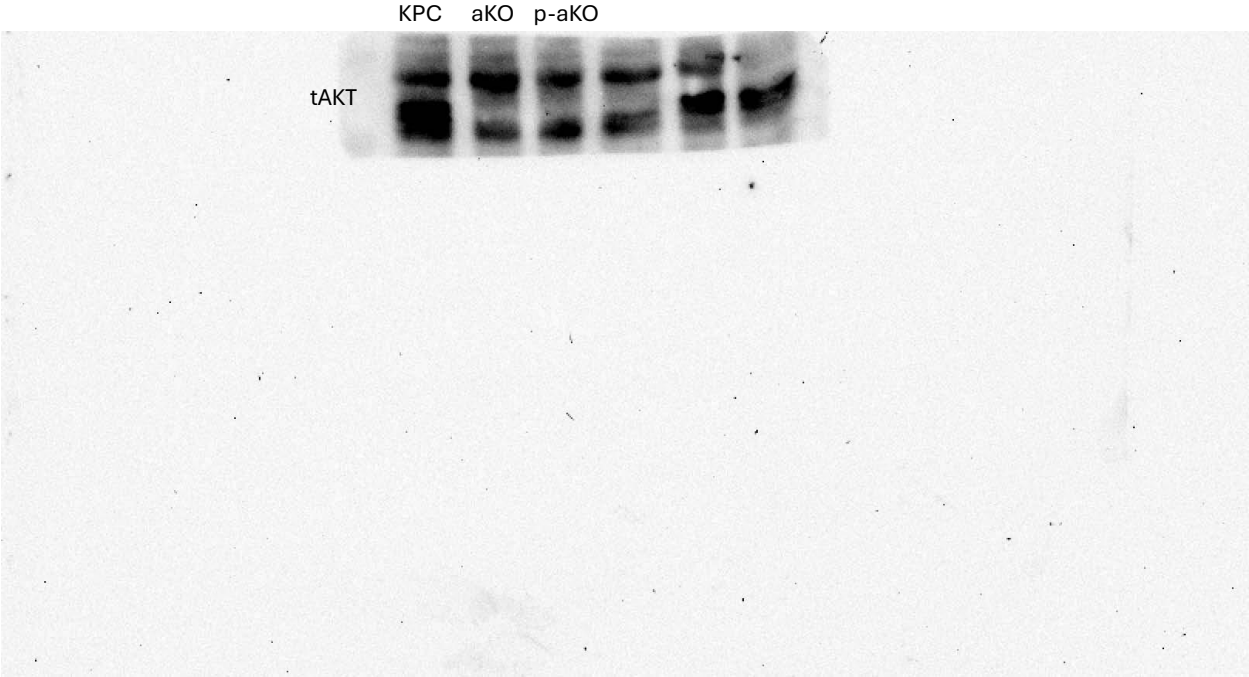

Supplement: fig3-data1 [file elife-96925-fig3-data1-v1.zip]

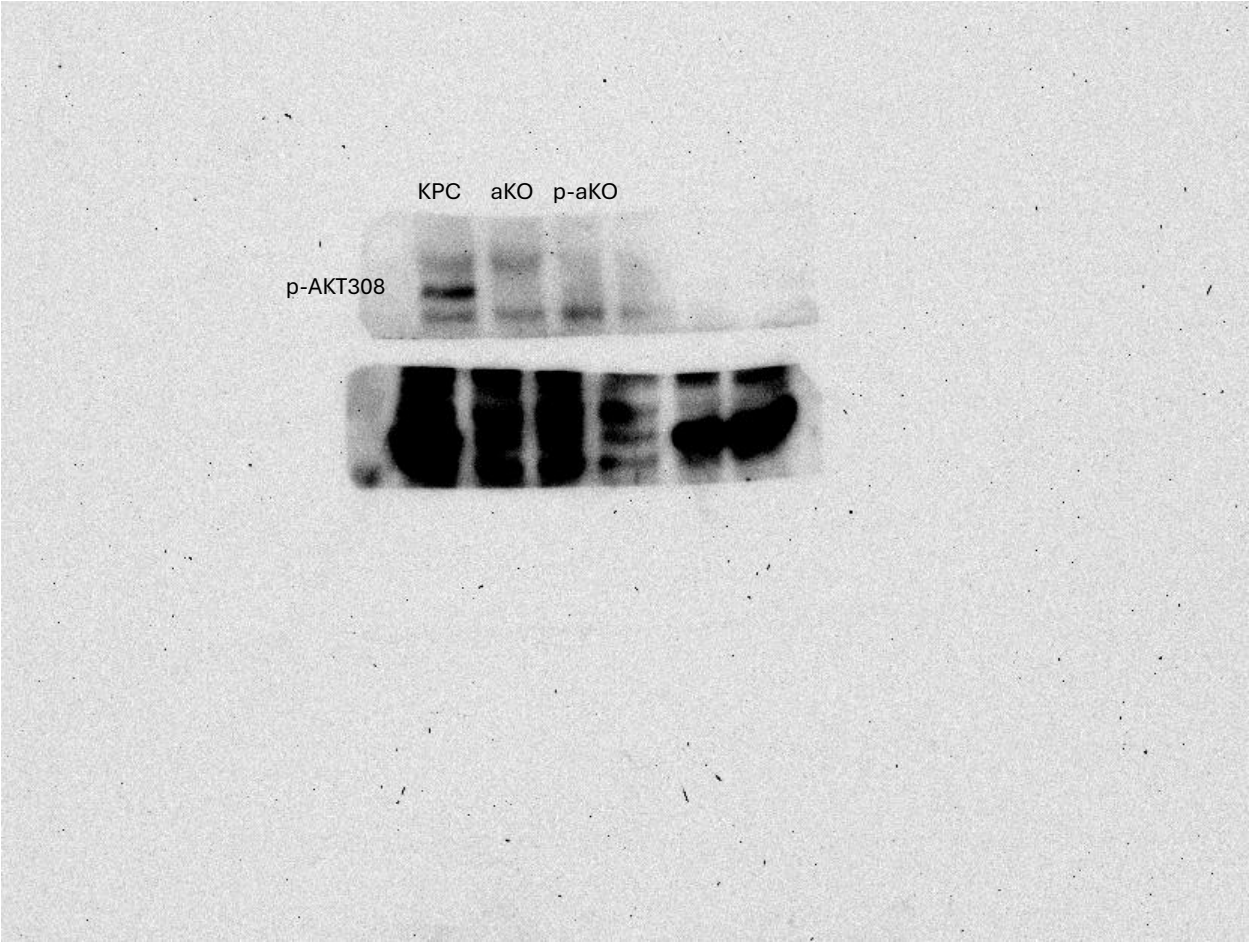

Supplement: fig3-data1 [file elife-96925-fig3-data1-v1.zip]

pAKT473

KPC aKO p-aKO

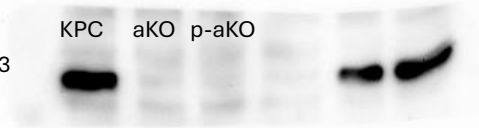

Supplement: fig3-data1 [file elife-96925-fig3-data1-v1.zip]

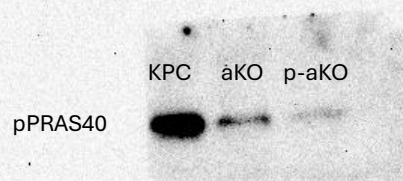

Supplement: fig3-data1 [file elife-96925-fig3-data1-v1.zip]
